# Supplementary material for: A large-scale nanoscopy and biochemistry analysis of postsynaptic dendritic spines
Source: Springer Nature journal article supplement (doi:10.1038/s41593-021-00874-w), 2021-06-24
Supplement: MOESM1 [file 41593_2021_874_MOESM1_ESM.pdf › 41593_2021_874_MOESM1_ESM.pdf]

---

**Supplementary information**

---

**A large-scale nanoscopy and biochemistry analysis of postsynaptic dendritic spines**

---

In the format provided by the  
authors and unedited



Protein name (Synonyms, Genename, Uniprot ID)

**Known function:** determined from literature

**Known organization:** determined from literature

**Known Interactions:** Only interactions with other proteins from this dataset are considered.

Rat hippocampal cultures were immunostained for the he protein of interest (red, STED) , the PSD marker Homer1 (blue, confocal), and the membrane was stained using DiO (green, confocal). Representative images for both classes are shown. The heatmap represents the average distribution of the protein of interest, obtained by aligning and averaging many spines of each class. The used colormap is inferno. The green outline represents the average membrane border of the spine, the blue circle the average position of the PSD. Scale bar is 500 nm for all images

The average distribution of the protein of interest is shown as a heatmap, obtained by aligning and averaging many spines of each class. The colormap is inferno, the green outline represents the average membrane border of the spine, the blue circle the average position of the PSD. Scale bar is 500 nm.

To quantify the protein localization and to make it comparable between the two classes, we defined corresponding functional zones (see Fig. S5). The fluorescence intensity was summed for each zone and normalized to the size of the zone. Then the fold difference to an average protein localization was calculated. The average protein localization was obtained using all proteins in this study.

Rat hippocampal were immunostained against the protein of interest (red) and the PSD marker Homer1 (blue), and imaged in epifluorescence to obtain the proportion of protein located in dendritic spines. A representative image is shown. Scale bar is 5  $\mu$ m.

|                        |                            |                |
|------------------------|----------------------------|----------------|
| Whole cell copy number | Mean $\pm$ SEM             |                |
| Spine copy number      | Mean $\pm$ SEM             |                |
| Function               | Determined from literature |                |
|                        | Mushroom                   | Stubby         |
| Spine copy number      | Mean $\pm$ SEM             | Mean $\pm$ SEM |
| % of total protein     | Mean $\pm$ SEM             | Mean $\pm$ SEM |
| Molarity ( $\mu$ M)    | Mean $\pm$ SEM             | Mean $\pm$ SEM |
| PSD copy number        | Mean $\pm$ SEM             | Mean $\pm$ SEM |
| % in PSD               | Mean $\pm$ SEM             | Mean $\pm$ SEM |

|          | Spine copy number | % of total protein | Molarity (μM) | PSD copy number |
|----------|-------------------|--------------------|---------------|-----------------|
| Mushroom | Mean ± SEM        | Mean ± SEM         | Mean ± SEM    | Mean ± SEM      |
| Stubby   | Mean ± SEM        | Mean ± SEM         | Mean ± SEM    | Mean ± SEM      |

Molecular structure of the protein of interest

Model of the average mushroom spine indicating the spatial organization of the protein of interest. The PSD is highlighted in red.

A zoom into the PSD of the mushroom model, which is highlighted in red.

A zoom into the neck of the mushroom model.

Several parameters were measured for each individual spine. The distribution is presented as a violin plot, the thick line indicates the median, the dotted lines upper and lower quartiles.

Enrichment head: The fluorescence signal within the head is calculated and compared to the fluorescence signal in the shaft.

Enrichment PSD: The fluorescence signal in the PSD was calculated and compared to the fluorescence signal in the shaft.

Nearest neighbor: For each protein spot the closest distance to the next spot of the protein of interest.

Distance to PSD: The shortest distance of every spot to the PSD.

Eccentricity: The position of all spots in the head is determined on the top-bottom axis and normalized. The top of the head is 1, the bottom is -1.

Laterality: The position of all spots in the head is determined on the lateral/center axis is determined. The center of the spine is 0, 1 is most left/right position.

For each spine class the correlation between the protein of interest signal with Homer1 signal was calculated. The color intensity represents the value. A solid border indicates a significant correlation, a grey border is non-significant. See also Fig. 5.

|          | Spine copy number | % of total protein | Molarity (μM) | PSD copy number |
|----------|-------------------|--------------------|---------------|-----------------|
| Mushroom | Mean ± SEM        | Mean ± SEM         | Mean ± SEM    | Mean ± SEM      |
| Stubby   | Mean ± SEM        | Mean ± SEM         | Mean ± SEM    | Mean ± SEM      |

Molecular structure of the protein of interest

Model of the average stubby spine indicating the spatial organization of the protein of interest. The PSD is highlighted in red.

A zoom into the PSD of the stubby model, which is highlighted in red.

A zoom into the interior of the mushroom model. The organelle on the left is the ER.

References

List of primary antibodies used for this protein.      **PDB Identifier:** Used to extract the protein structure

**Literature:**

A list of references used to additionally determine the appropriate organization, localization and function of the protein of interest.

## Actin (Genes: Actg1, Actb, Actc1, Uniprot ID: P63259, P60711, P68035)

**Known function:** Shapes spine morphology, serves as scaffold for transport

**Known organization:** Cytosolic, forms filaments, rings in neck and shaft

**Known Interactions:**  $\beta$ -2-spectrin

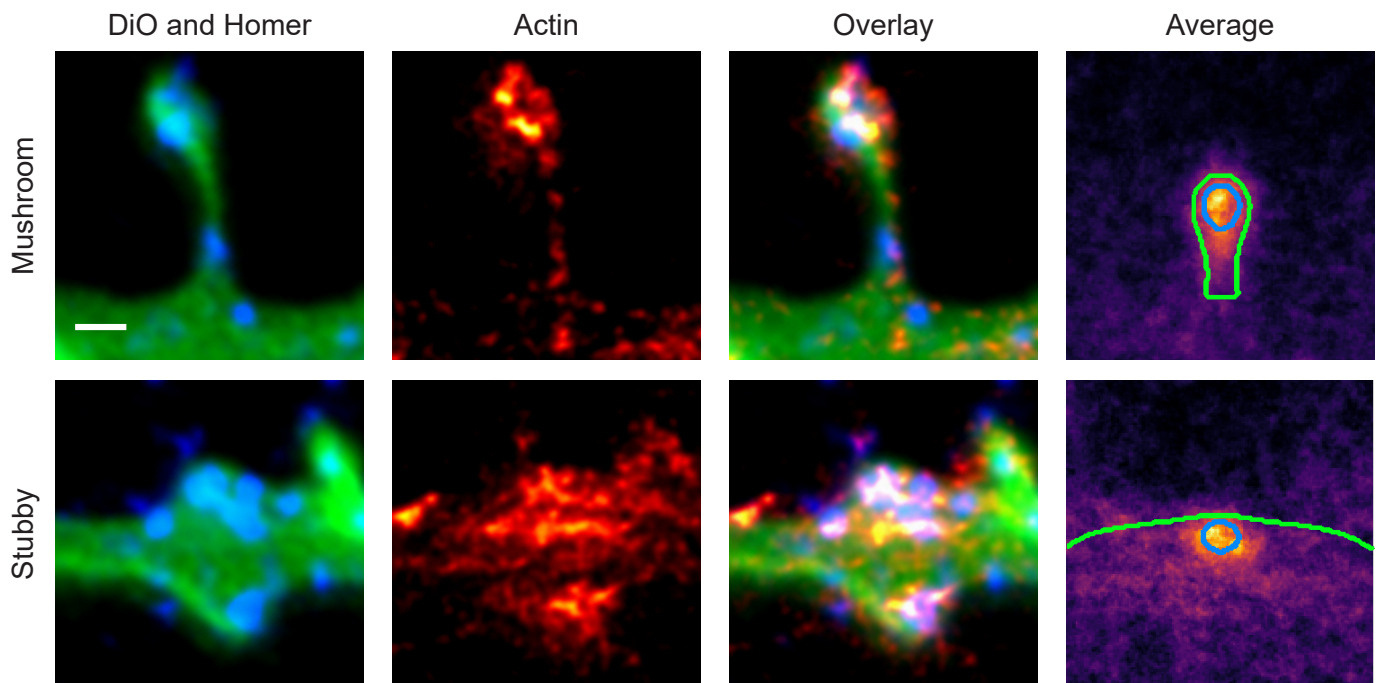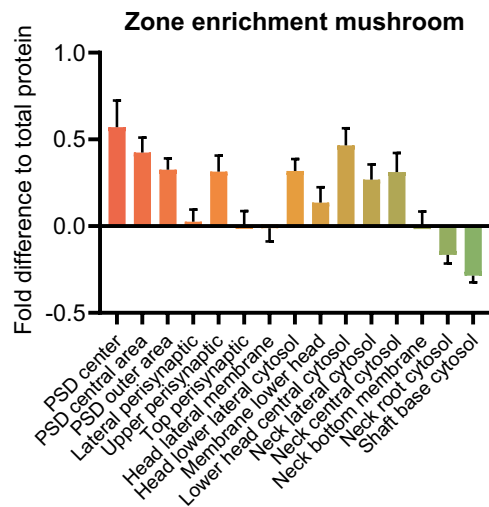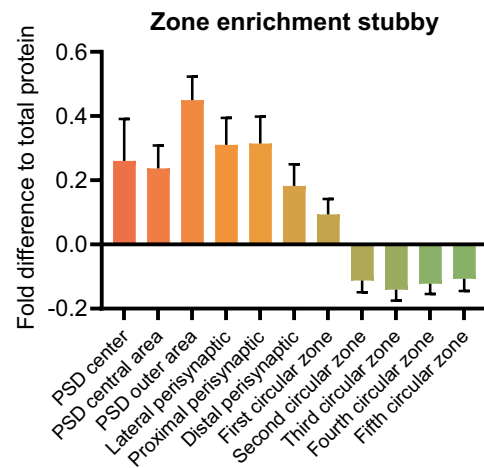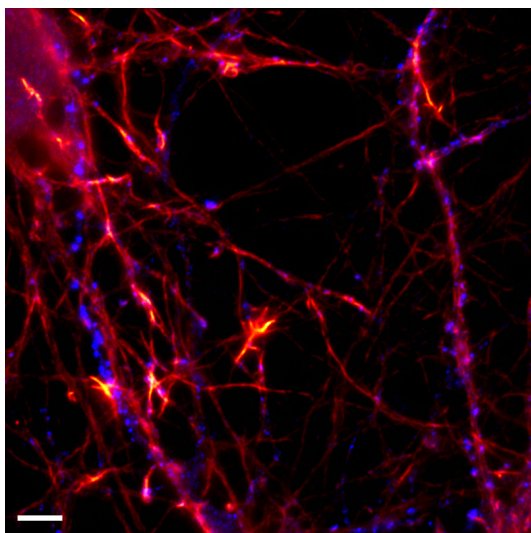

|                        |                             |                       |
|------------------------|-----------------------------|-----------------------|
| Whole cell copy number | 481057719.6<br>± 45433802.4 |                       |
| Spine copy number      | 213638.4<br>± 331711.4      |                       |
| Function               | Cytoskeleton                |                       |
|                        | Mushroom                    | Stubby                |
| Spine copy number      | 241916.1<br>± 35908.8       | 185822.6<br>± 27582.6 |
| % of total protein     | 49.3 ± 7.3%                 | 32.6 ± 4.8%           |
| Molarity (μM)          | 3072.4 ± 456.0              | 1756.2 ± 260.7        |
| PSD copy number        | 95755<br>± 14213.4          | 69304<br>± 10287.1    |
| % in PSD               | 39.6 ± 5.9%                 | 37.3 ± 37.3           |

|          | Spine copy number      | % of total protein | Molarity ( $\mu\text{M}$ ) | PSD copy number     |
|----------|------------------------|--------------------|----------------------------|---------------------|
| Mushroom | $241916.1 \pm 35908.8$ | $49.3 \pm 7.3\%$   | $3072.4 \pm 456.0$         | $95755 \pm 14213.4$ |
| Stubby   | $185822.6 \pm 27582.6$ | $32.6 \pm 4.8\%$   | $1756.2 \pm 260.7$         | $69304 \pm 10287.1$ |

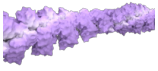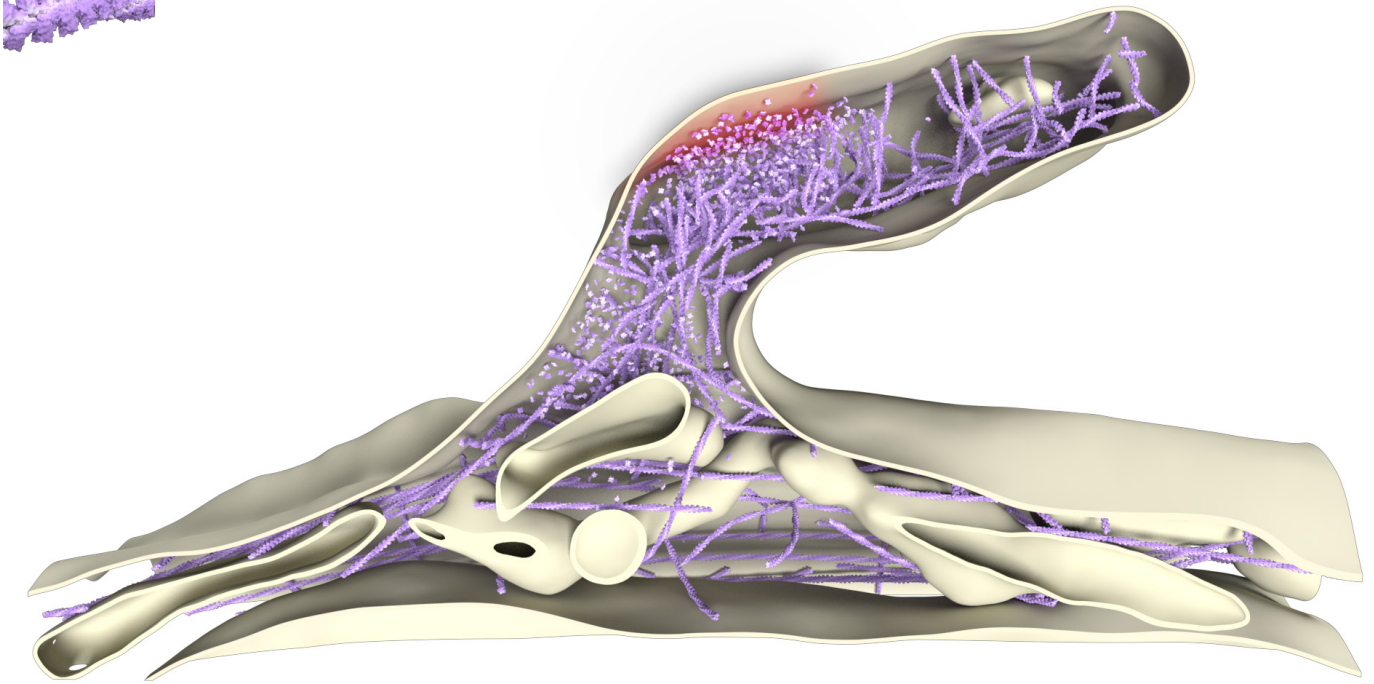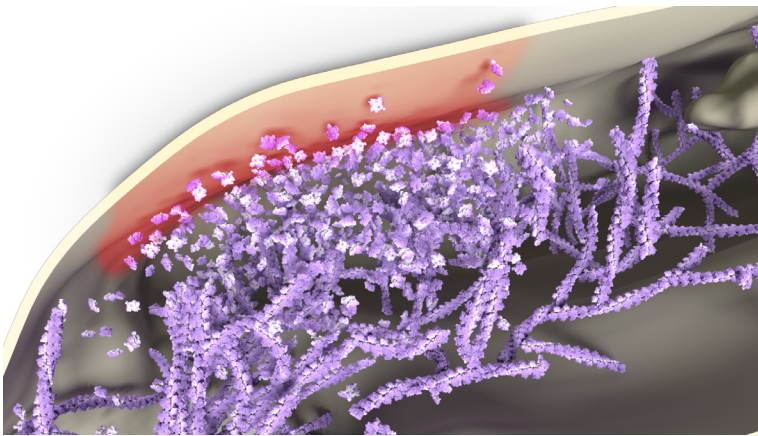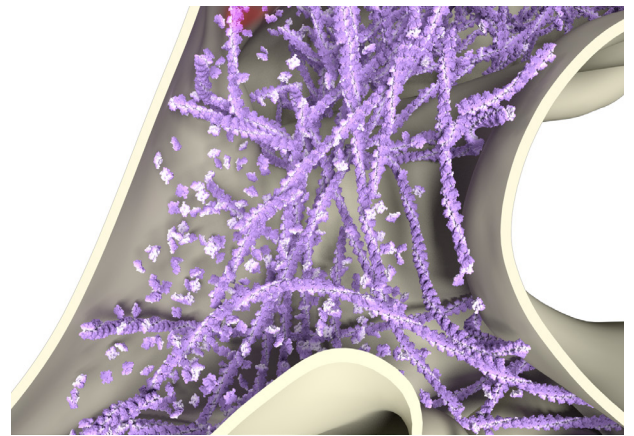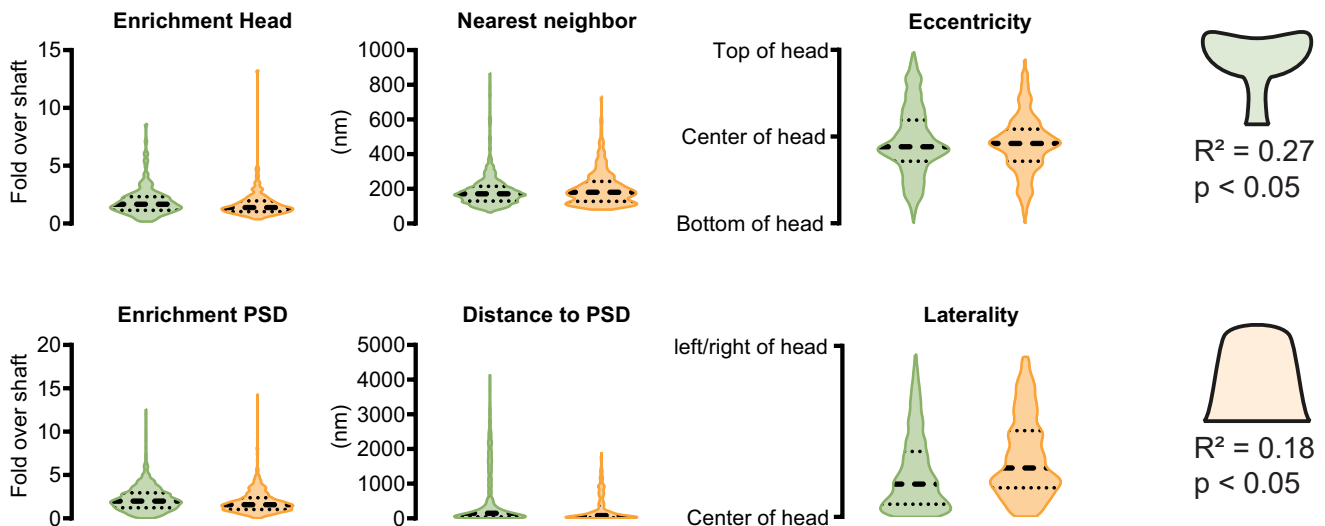



|          | Spine copy number      | % of total protein | Molarity ( $\mu\text{M}$ ) | PSD copy number     |
|----------|------------------------|--------------------|----------------------------|---------------------|
| Mushroom | $241916.1 \pm 35908.8$ | $49.3 \pm 7.3\%$   | $3072.4 \pm 456.0$         | $95755 \pm 14213.4$ |
| Stubby   | $185822.6 \pm 27582.6$ | $32.6 \pm 4.8\%$   | $1756.2 \pm 260.7$         | $69304 \pm 10287.1$ |

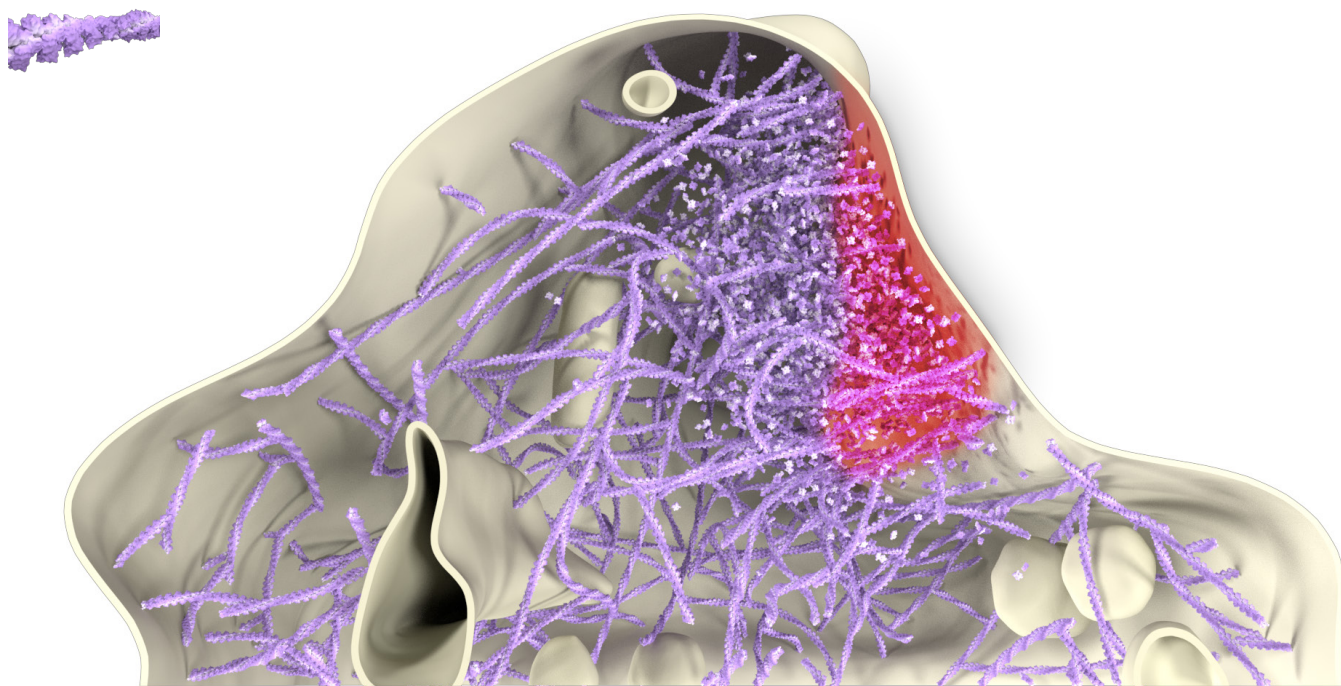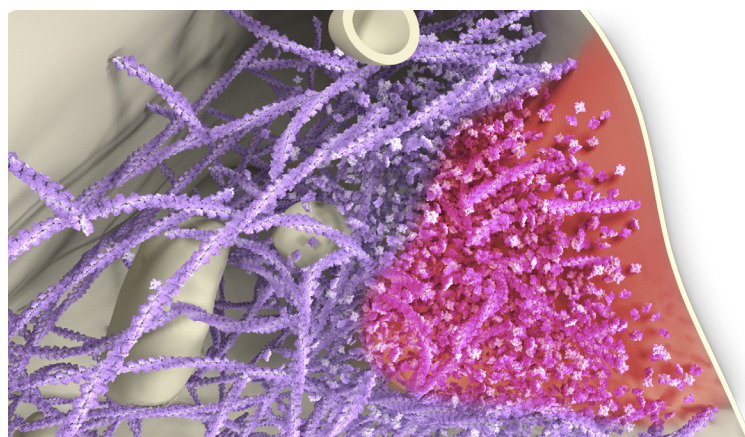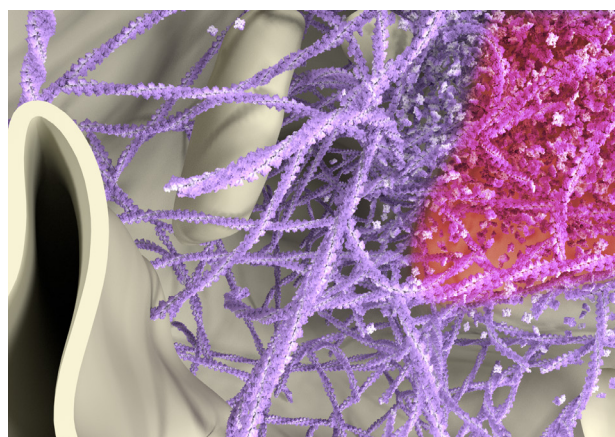

## References

**Phalloidin** Sigma Aldrich 65906

**PDB Identifier:** 1j6z

### Literature:

Bär et al., 2016, Sci. Rep.

Burette et al., 2012, J. Comp. Neurol.

Chaezeau et al., 2014, Cell. Mol. Life Sci.

D'Este et al., 2015, Cell Rep.

D'Este et al., 2016, Sci. Rep.

Korobova and Svitkina, 2010, Mol. Biol. Cell

Sidenstein et al., 2016, Sci. Rep.

Xu et al., 2013, Science

## ADAM22 (Gene: Adam22, Uniprot ID: M0R5P8)

**Known function:** Catalytically inactive metalloprotease, Involved in cell adhesion, Regulation of AMPAR, K<sub>v</sub>1 channels and PSD95

**Known organization:** Transmembrane protein, On PM

**Known Interactions:** K<sub>v</sub>1.1, PSD95, AMPA receptors

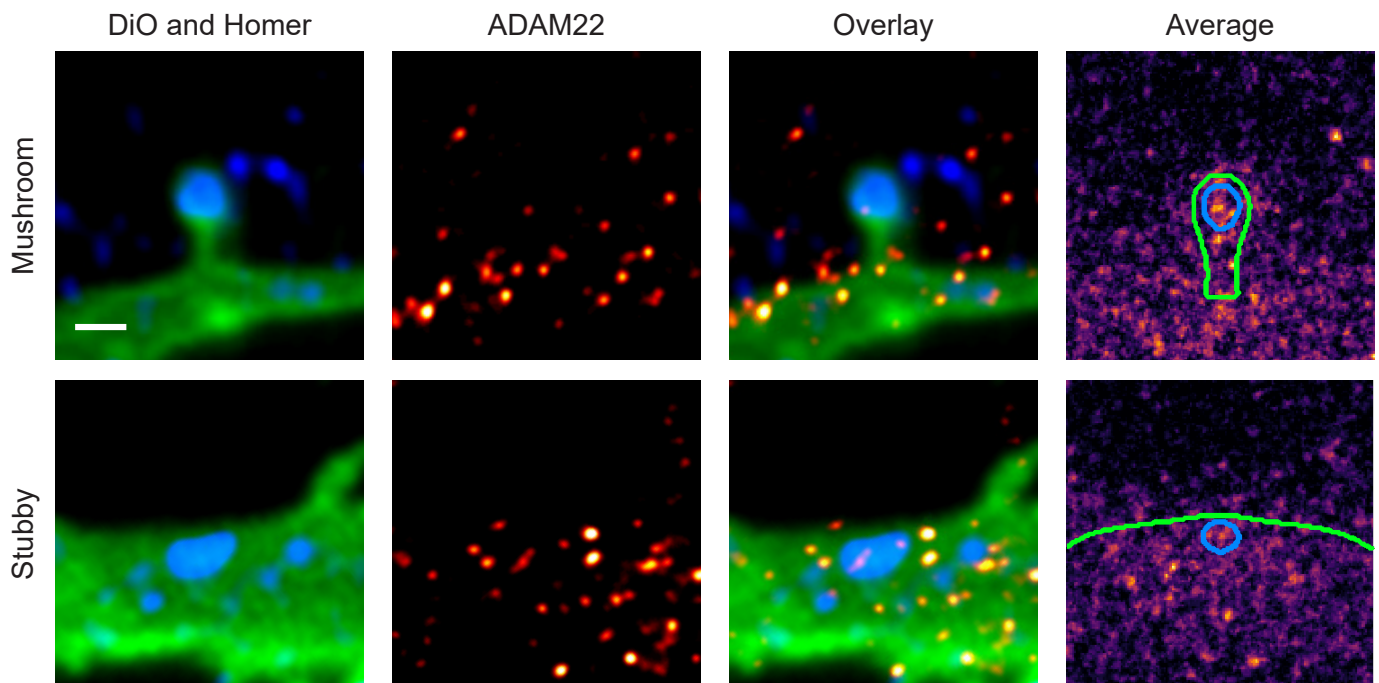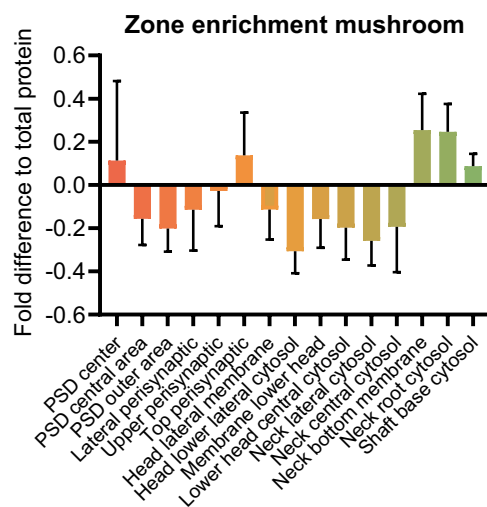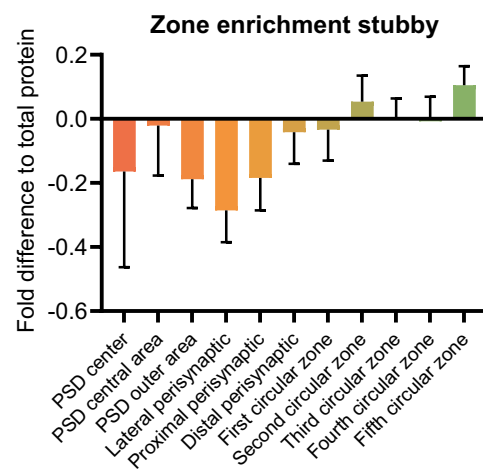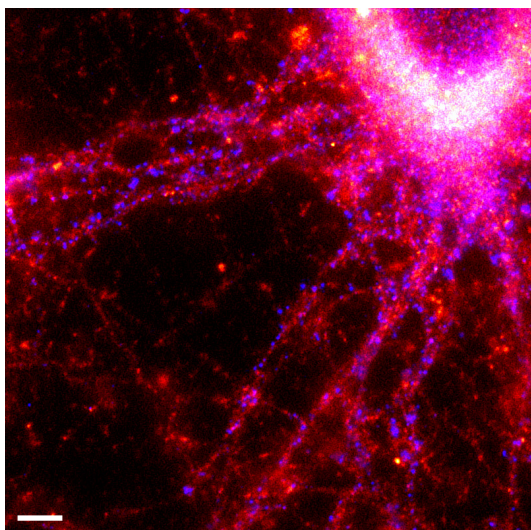

|                        |                      |            |
|------------------------|----------------------|------------|
| Whole cell copy number | 89590.0<br>± 18537.6 |            |
| Spine copy number      | 6.1 ± 2.8            |            |
| Function               | Signaling            |            |
|                        | Mushroom             | Stubby     |
| Spine copy number      | 5.2 ± 2.4            | 7.5 ± 3.4  |
| % of total protein     | 0.0 ± 0.0%           | 0.0 ± 0.0% |
| Molarity (μM)          | 0.1 ± 0.0            | 0.1 ± 0.0  |
| PSD copy number        | 1 ± 0.5              | 0 ± 0.0    |
| % in PSD               | 19.1 ± 8.7%          | 0.0 ± 0.0% |



|          | Spine copy number | % of total protein | Molarity ( $\mu\text{M}$ ) | PSD copy number |
|----------|-------------------|--------------------|----------------------------|-----------------|
| Mushroom | $5.2 \pm 2.4$     | $0.0 \pm 0.0\%$    | $0.1 \pm 0.0$              | $1 \pm 0.5$     |
| Stubby   | $7.5 \pm 3.4$     | $0.0 \pm 0.0\%$    | $0.1 \pm 0.0$              | $0 \pm 0.0$     |

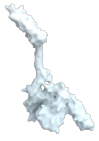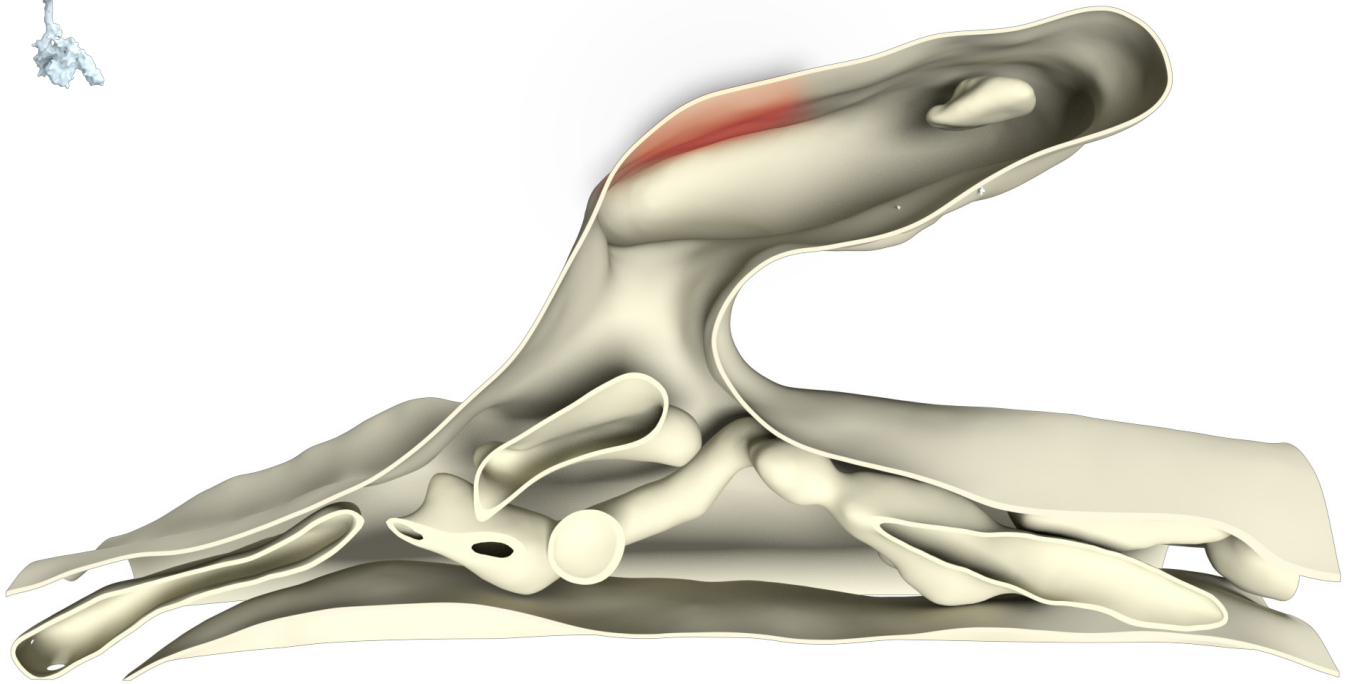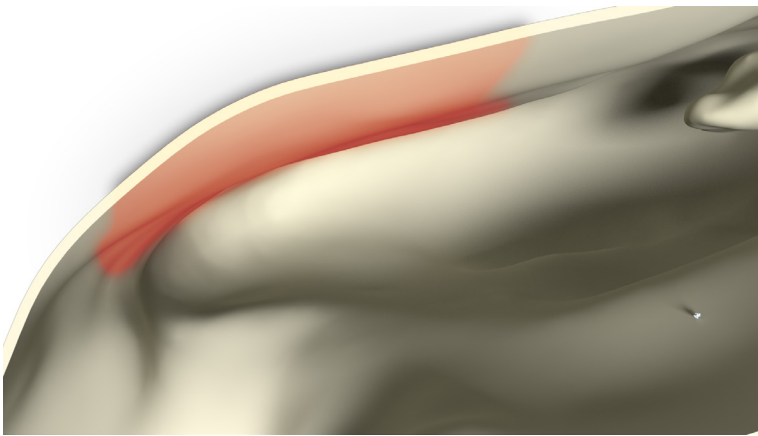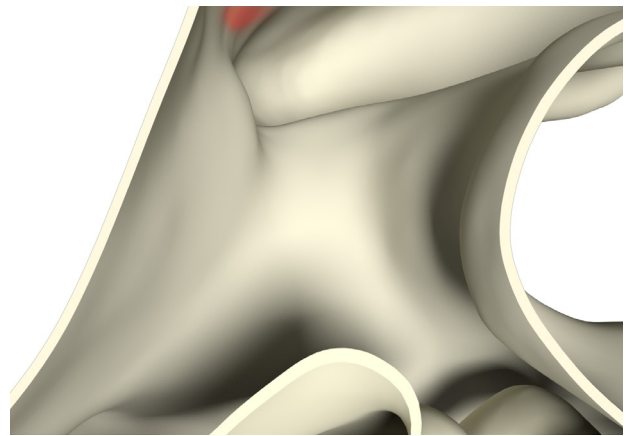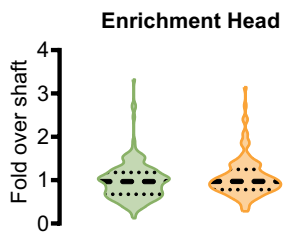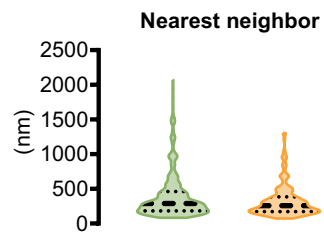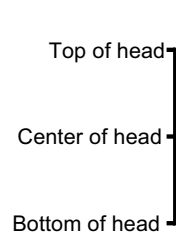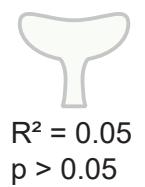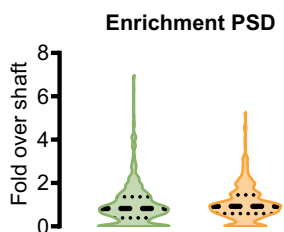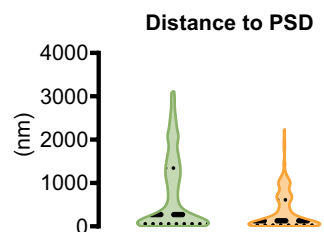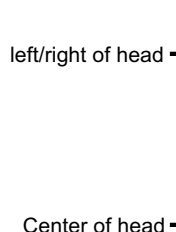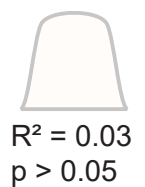



|          | Spine copy number | % of total protein | Molarity ( $\mu\text{M}$ ) | PSD copy number |
|----------|-------------------|--------------------|----------------------------|-----------------|
| Mushroom | $5.2 \pm 2.4$     | $0.0 \pm 0.0\%$    | $0.1 \pm 0.0$              | $1 \pm 0.5$     |
| Stubby   | $7.5 \pm 3.4$     | $0.0 \pm 0.0\%$    | $0.1 \pm 0.0$              | $0 \pm 0.0$     |

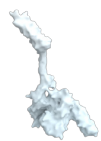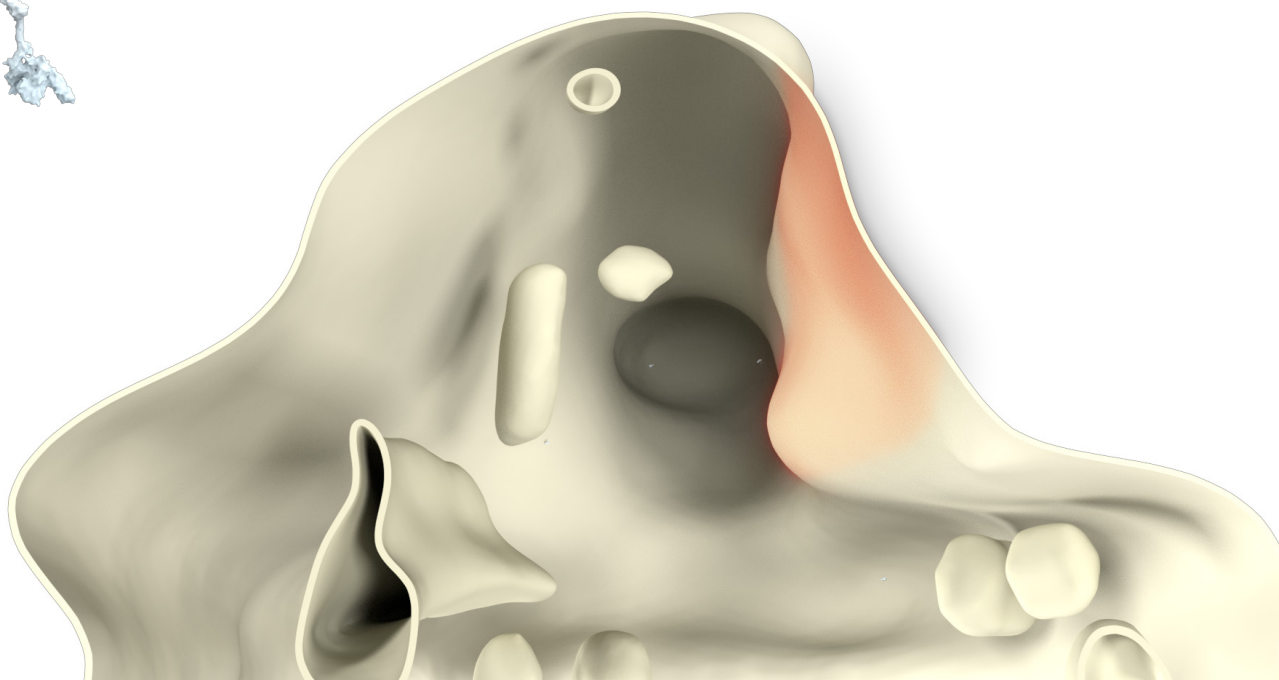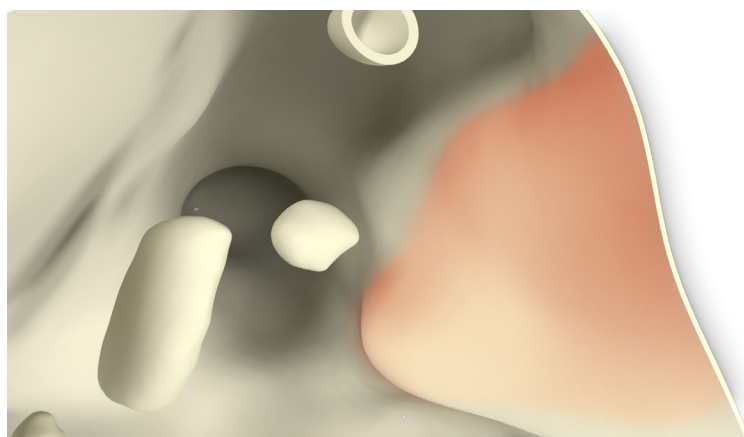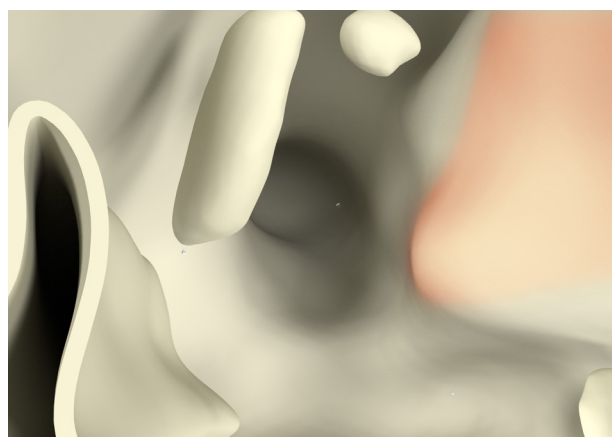

## References

**Antibody:** Novus Biologicals NBP2-22425

**PDB Identifier:** 5y2z

### Literature:

D'Abaco et al., 2006, Neurosurgery

Fukata et al., 2006, Science

Lovero et al., 2015, PNAS

Ogawa et al., 2010, J. Neurosci.

Poindexter et al., 1999, Gene

Sagane et al., 1998, Biochem. J.

## $\alpha$ -Internexin (Gene: Ina , Uniprot ID: P23565)

**Known function:** Part of the neurofilament filament

**Known organization:** Cytosolic

**Known Interactions:** Neurofilaments, Tubulins

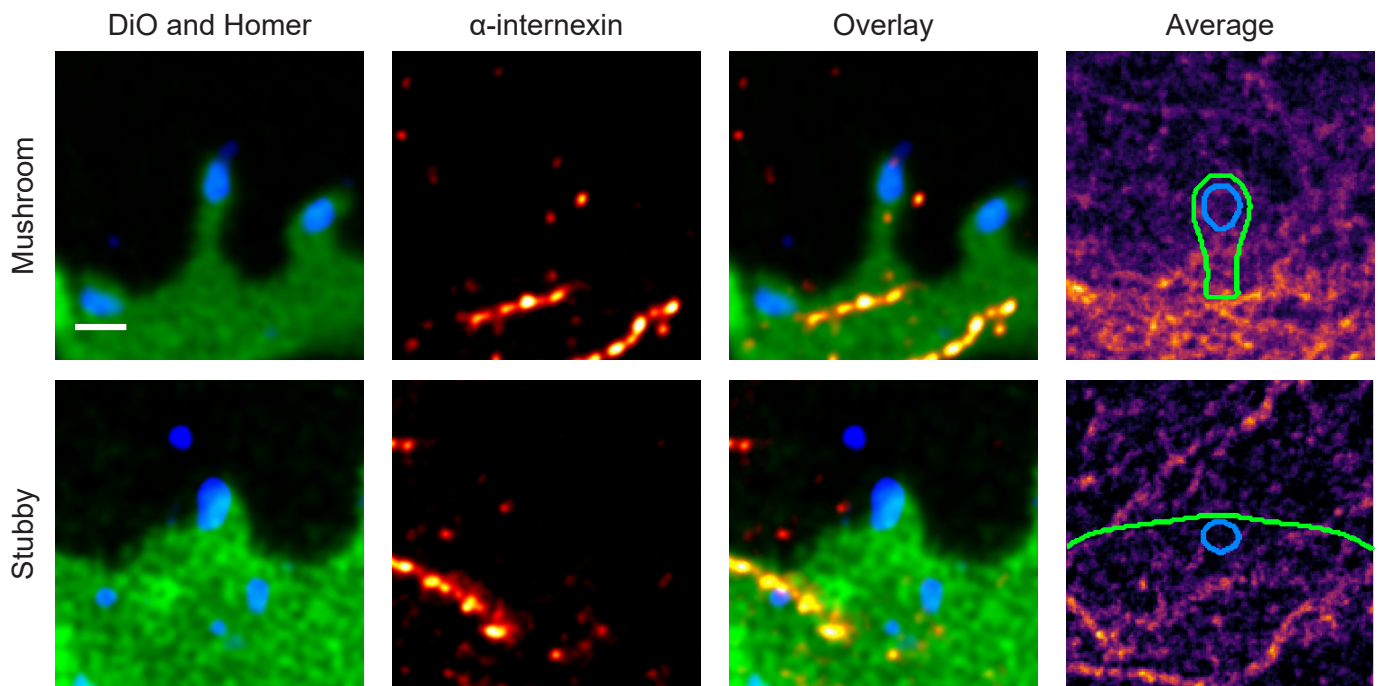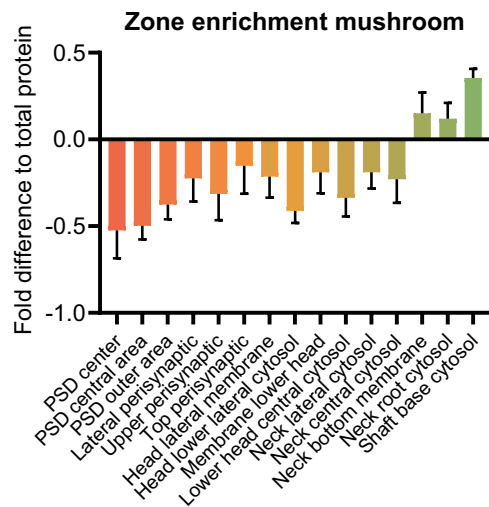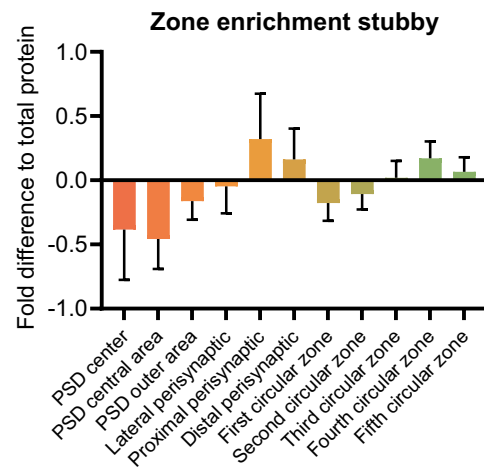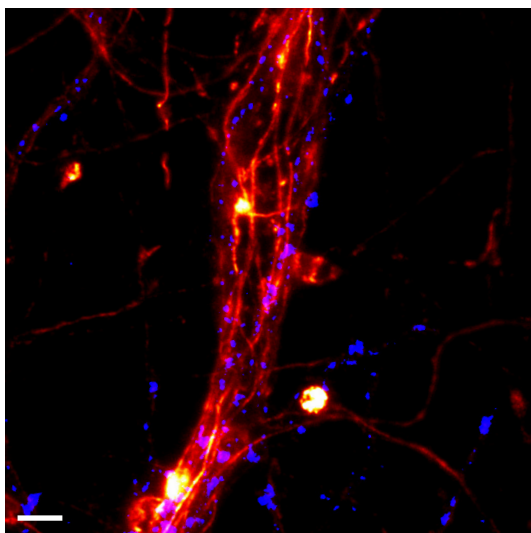

|                        |                            |                   |
|------------------------|----------------------------|-------------------|
| Whole cell copy number | 12483426.0 $\pm$ 1142313.6 |                   |
| Spine copy number      | 648.1 $\pm$ 722.3          |                   |
| Function               | Cytoskeleton               |                   |
|                        | Mushroom                   | Stubby            |
| Spine copy number      | 660.1 $\pm$ 735.6          | 469.1 $\pm$ 522.8 |
| % of total protein     | 0.2 $\pm$ 0.2%             | 0.1 $\pm$ 0.1%    |
| Molarity ( $\mu$ M)    | 8.4 $\pm$ 9.3              | 4.4 $\pm$ 4.9     |
| PSD copy number        | 34 $\pm$ 37.9              | 18 $\pm$ 20.1     |
| % in PSD               | 5.2 $\pm$ 5.7%             | 3.8 $\pm$ 3.8%    |

|          | Spine copy number | % of total protein | Molarity ( $\mu\text{M}$ ) | PSD copy number |
|----------|-------------------|--------------------|----------------------------|-----------------|
| Mushroom | $660.1 \pm 735.6$ | $0.2 \pm 0.2\%$    | $8.4 \pm 9.3$              | $34 \pm 37.9$   |
| Stubby   | $469.1 \pm 522.8$ | $0.1 \pm 0.1\%$    | $4.4 \pm 4.9$              | $18 \pm 20.1$   |

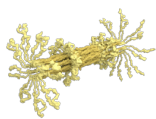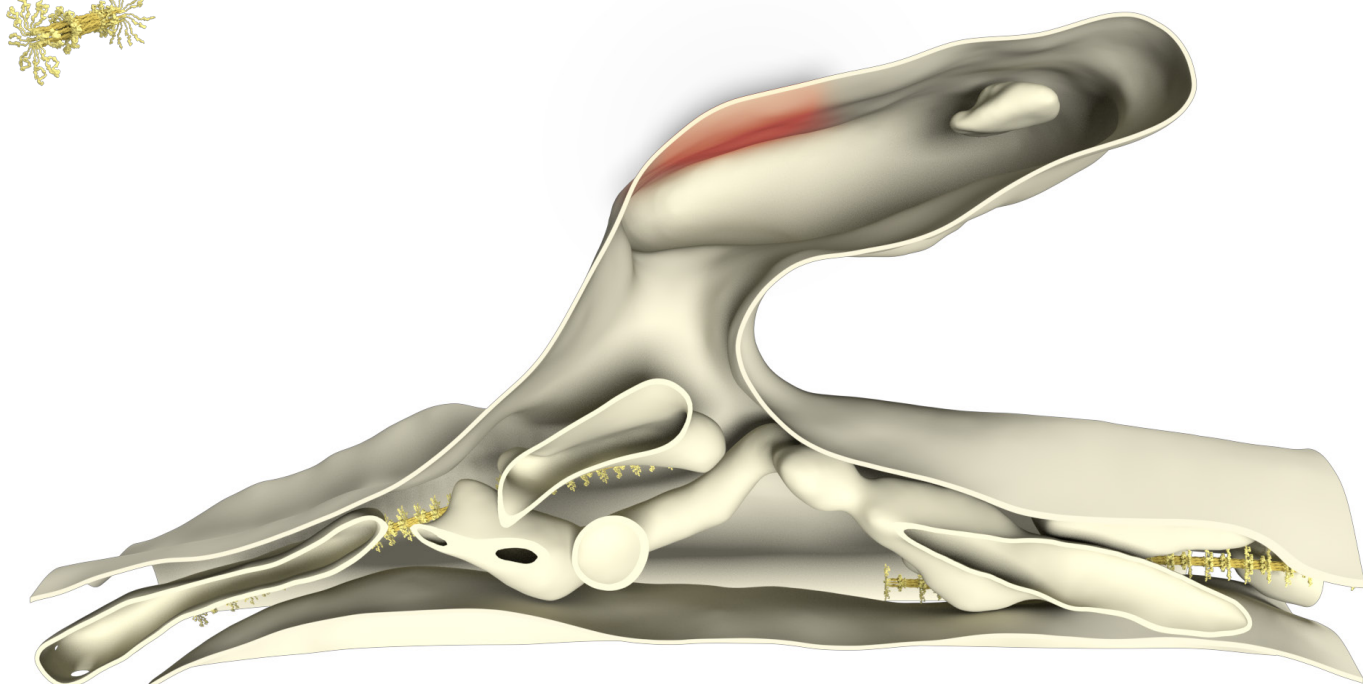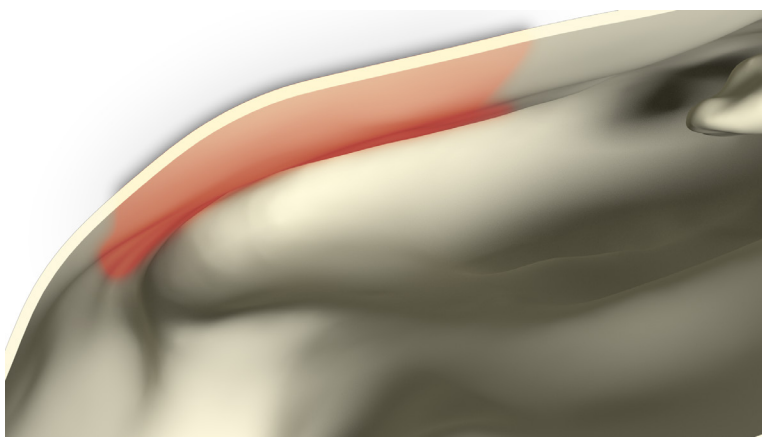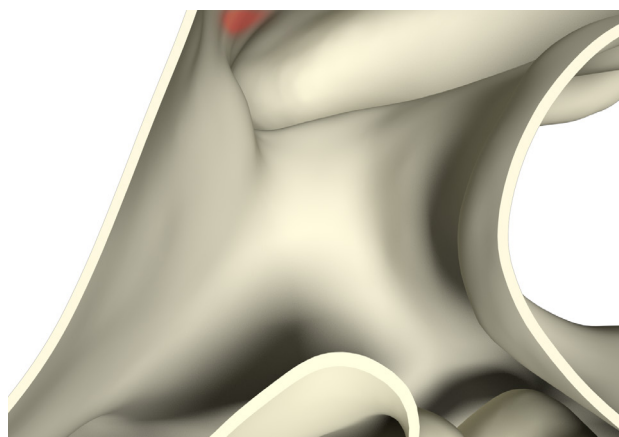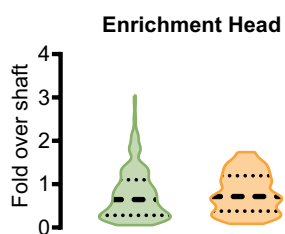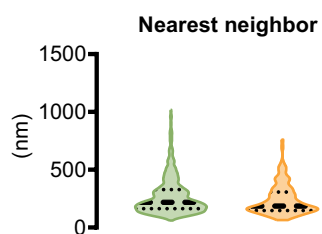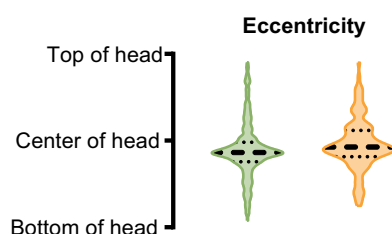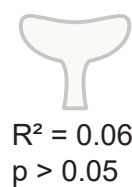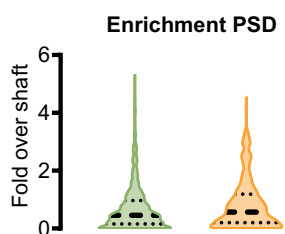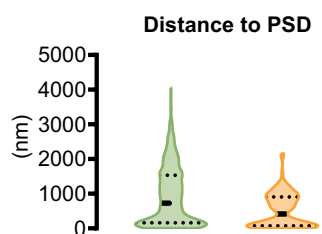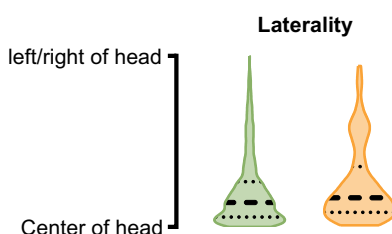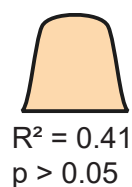

|          | Spine copy number | % of total protein | Molarity ( $\mu\text{M}$ ) | PSD copy number |
|----------|-------------------|--------------------|----------------------------|-----------------|
| Mushroom | $660.1 \pm 735.6$ | $0.2 \pm 0.2\%$    | $8.4 \pm 9.3$              | $34 \pm 37.9$   |
| Stubby   | $469.1 \pm 522.8$ | $0.1 \pm 0.1\%$    | $4.4 \pm 4.9$              | $18 \pm 20.1$   |

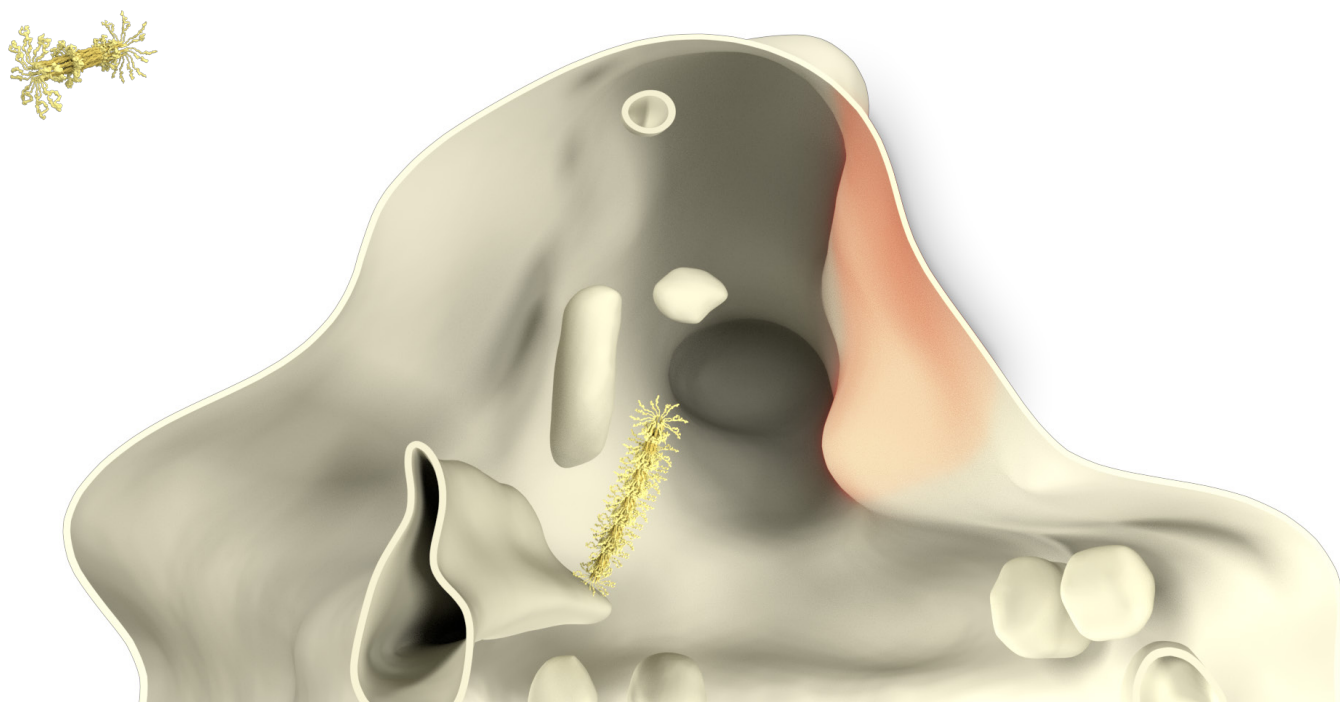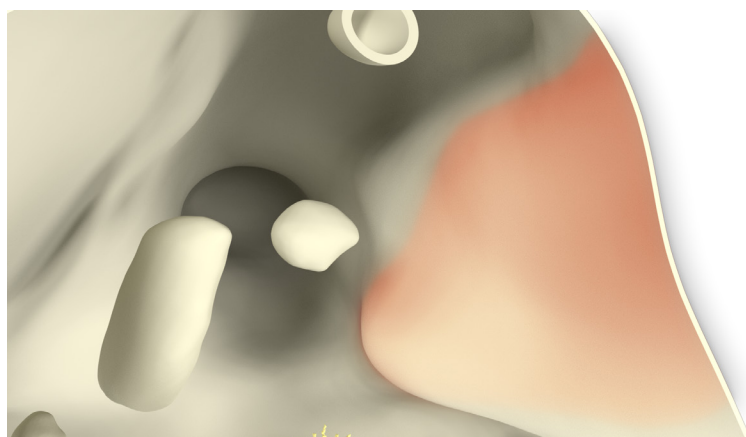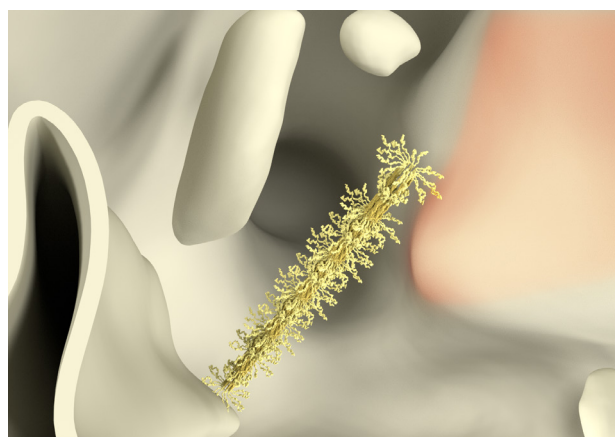

## References

**Antibody:** LS Bio LS-B10413

**PDB Identifier:** modified NF-H

### Literature:

Suzuki et al., 1997, Brain Res.

Suzuki et al., 2018, J. Neurochem.

Yuan et al., 2006, J. Neurosci.

Yuan et al., 2015a, Mol. Psychiatry

Yuan et al., 2015b, Mol. Psychiatry



## pan-Akt (PKB, Genes: Akt1, Akt2, Akt3, Uniprot ID: P47196, P47196, P47196)

**Known function:** Mediates PI3-K signaling, Activates nNOS, Regulates AMPAR expression, Is activated by NMDA receptors

**Known organization:** Cytosolic

**Known Interactions:** nNOS

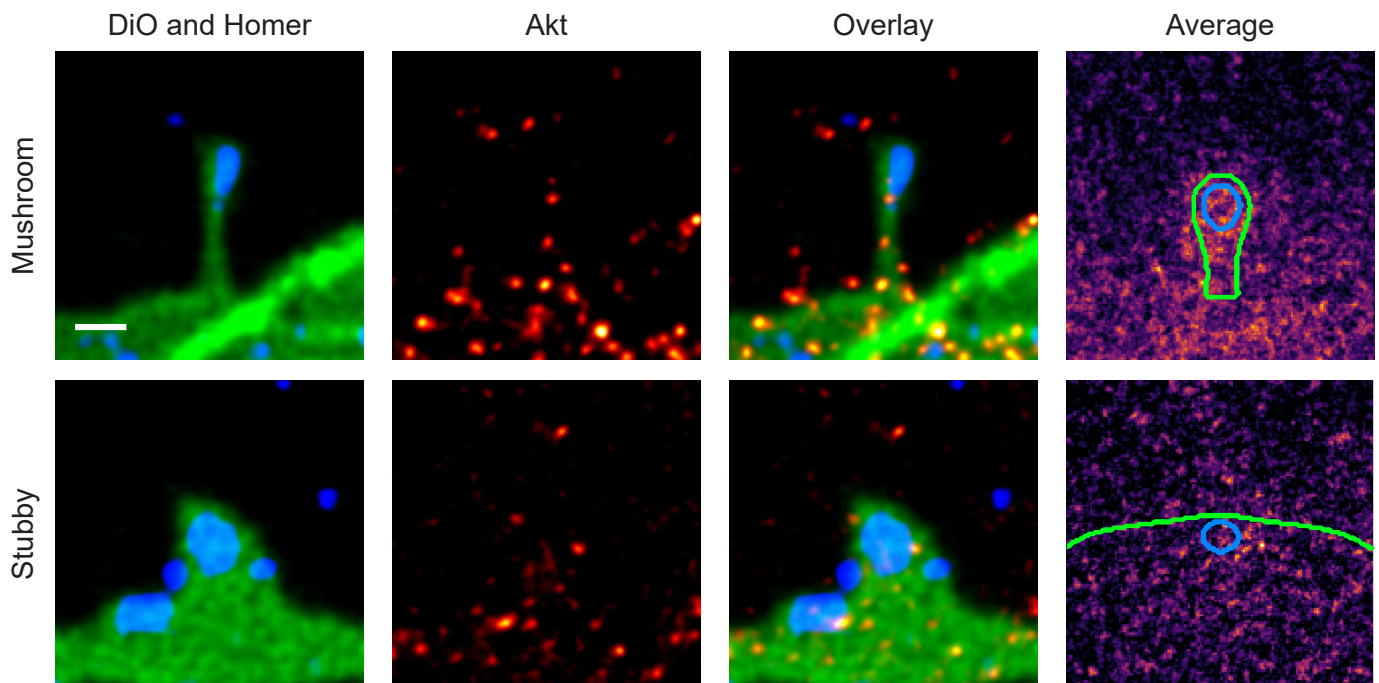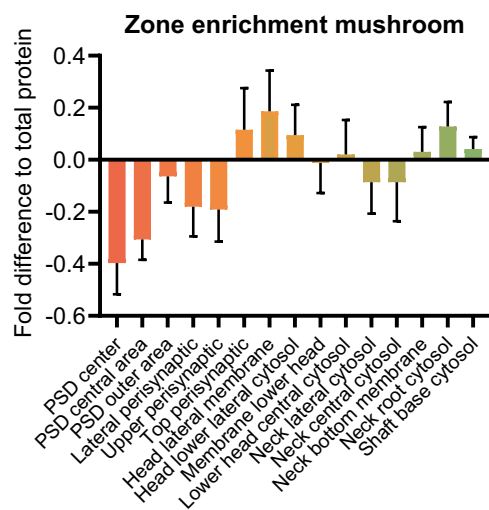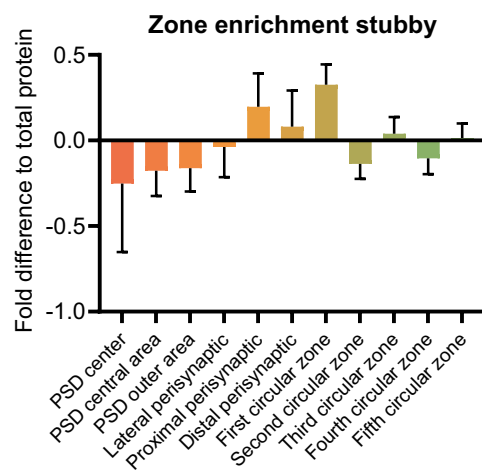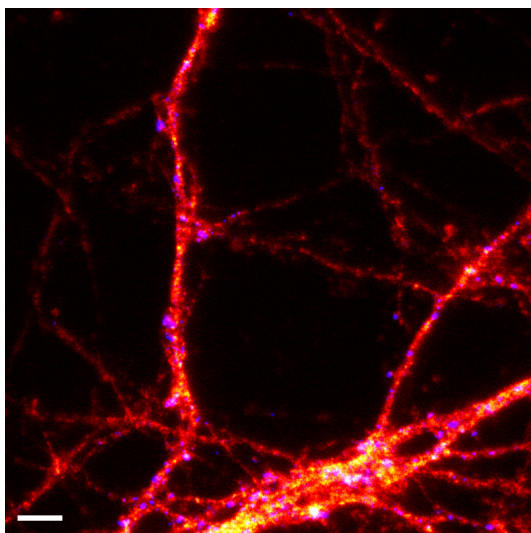

|                        |                       |             |
|------------------------|-----------------------|-------------|
| Whole cell copy number | 395481.9<br>± 58959.4 |             |
| Spine copy number      | 24.2 ± 11.0           |             |
| Function               | Signaling             |             |
|                        | Mushroom              | Stubby      |
| Spine copy number      | 22.6 ± 10.3           | 22.3 ± 10.2 |
| % of total protein     | 0.0 ± 0.0%            | 0.0 ± 0.0%  |
| Molarity (μM)          | 0.3 ± 0.1             | 0.2 ± 0.1   |
| PSD copy number        | 5 ± 2.3               | 0 ± 0.0     |
| % in PSD               | 22.2 ± 10.1%          | 0.0 ± 0.0%  |

|          | Spine copy number | % of total protein | Molarity ( $\mu\text{M}$ ) | PSD copy number |
|----------|-------------------|--------------------|----------------------------|-----------------|
| Mushroom | $22.6 \pm 10.3$   | $0.0 \pm 0.0\%$    | $0.3 \pm 0.1$              | $5 \pm 2.3$     |
| Stubby   | $22.3 \pm 10.2$   | $0.0 \pm 0.0\%$    | $0.2 \pm 0.1$              | $0 \pm 0.0$     |

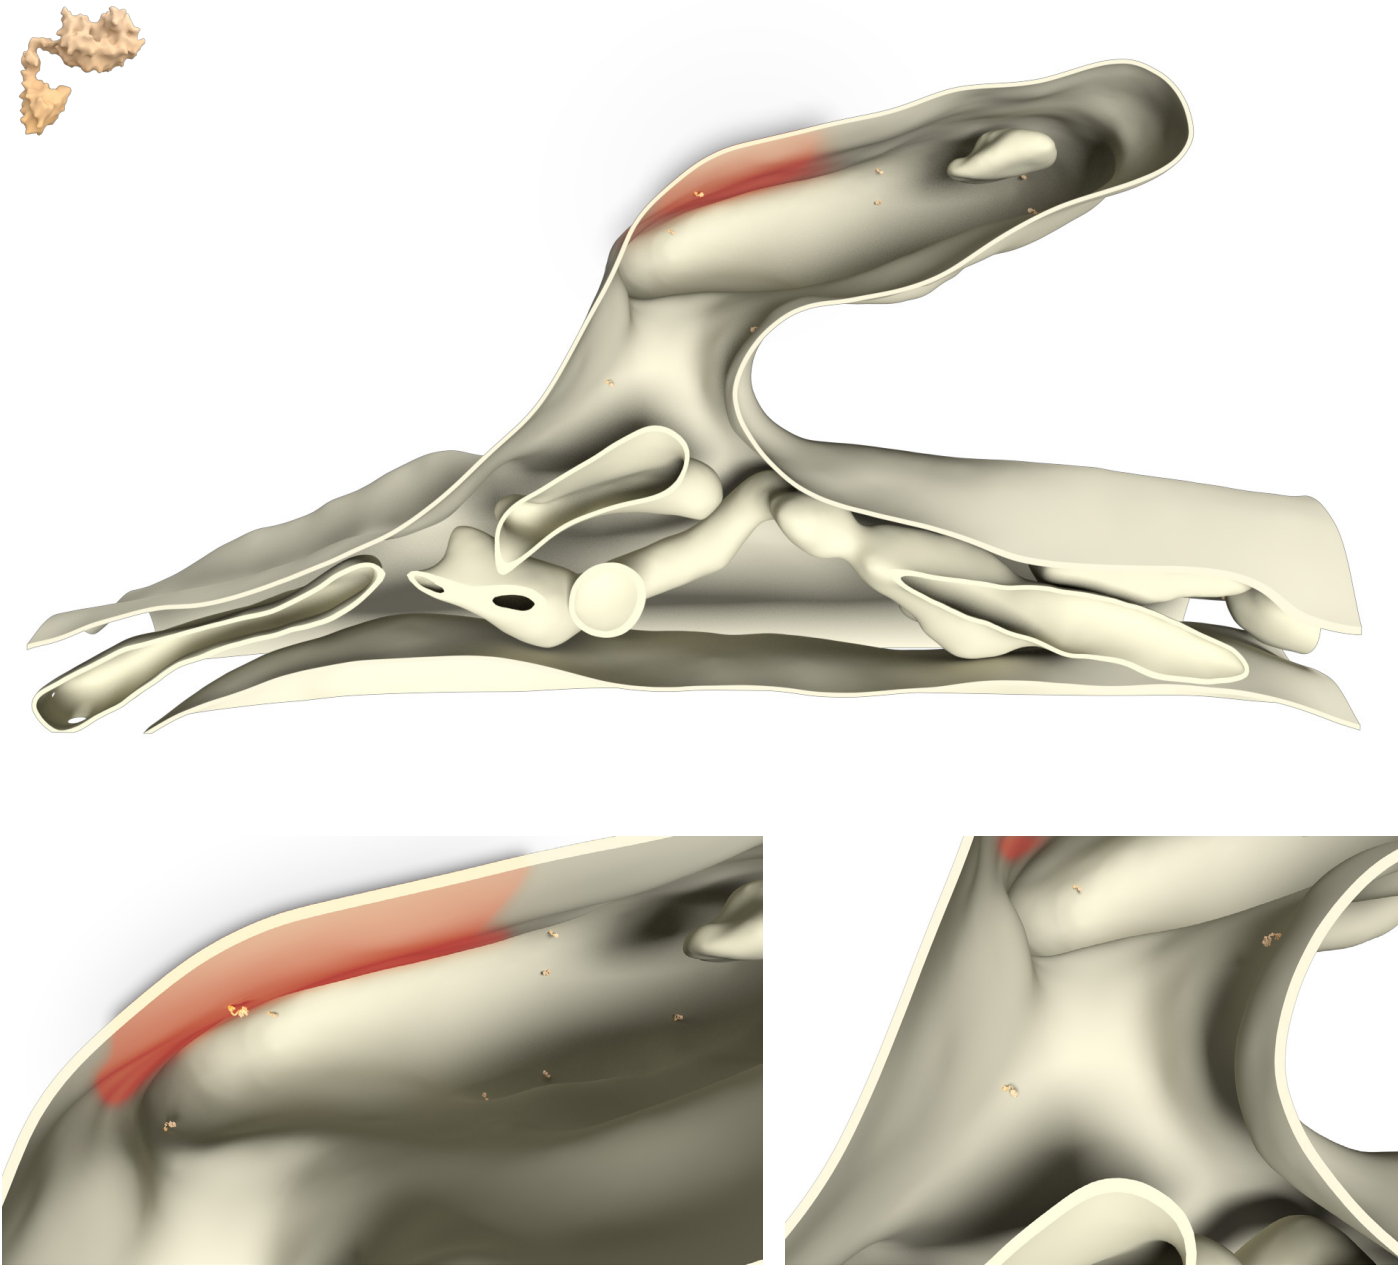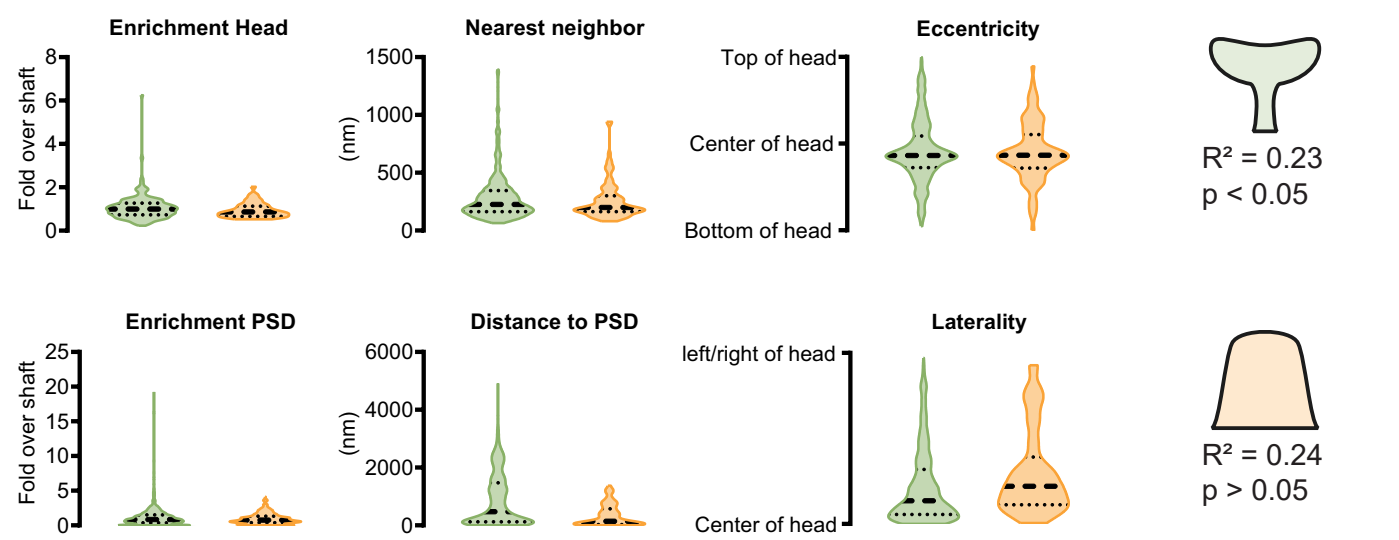

|          | Spine copy number | % of total protein | Molarity ( $\mu\text{M}$ ) | PSD copy number |
|----------|-------------------|--------------------|----------------------------|-----------------|
| Mushroom | $22.6 \pm 10.3$   | $0.0 \pm 0.0\%$    | $0.3 \pm 0.1$              | $5 \pm 2.3$     |
| Stubby   | $22.3 \pm 10.2$   | $0.0 \pm 0.0\%$    | $0.2 \pm 0.1$              | $0 \pm 0.0$     |

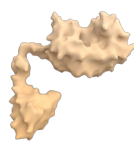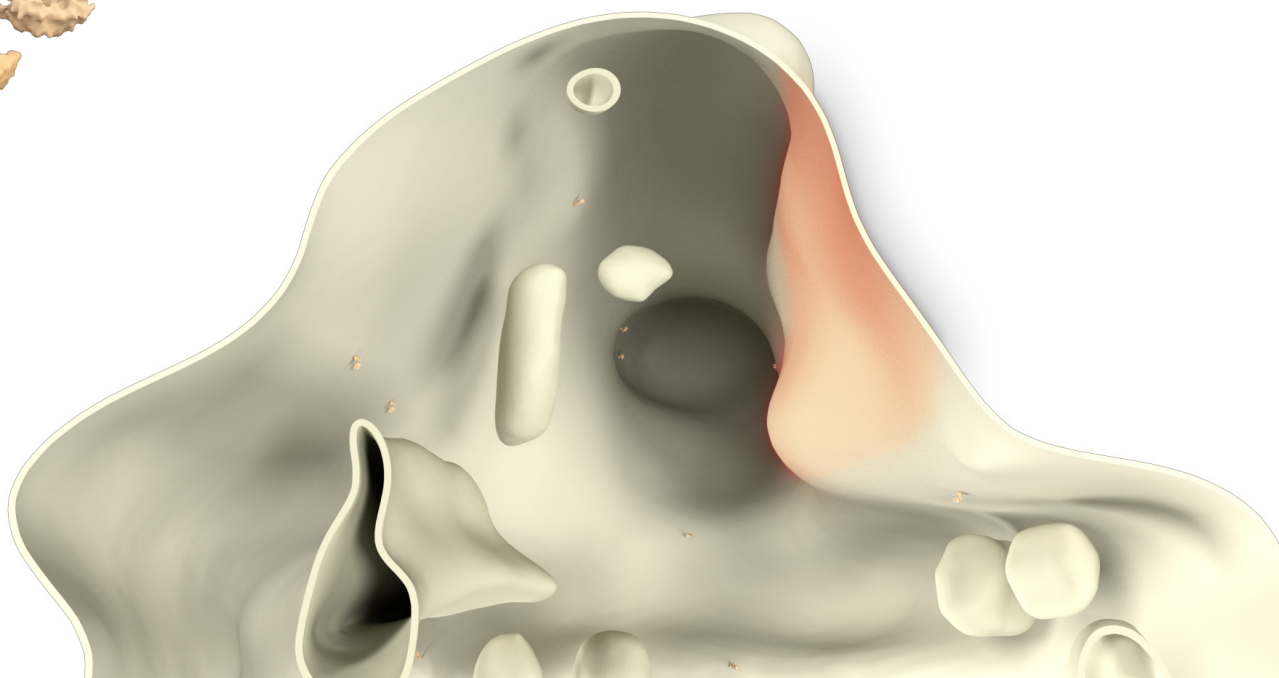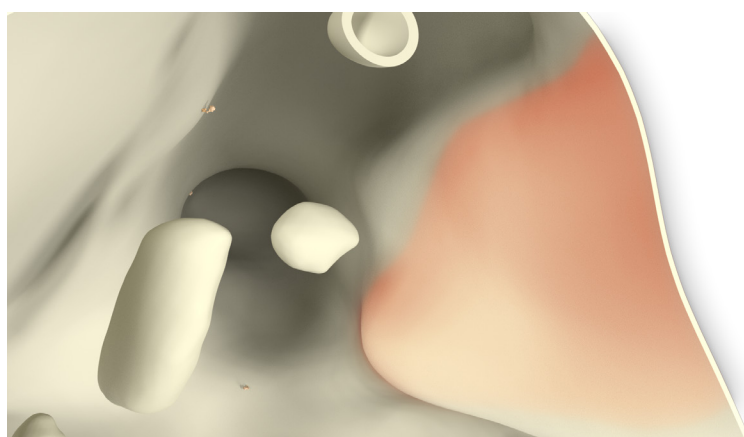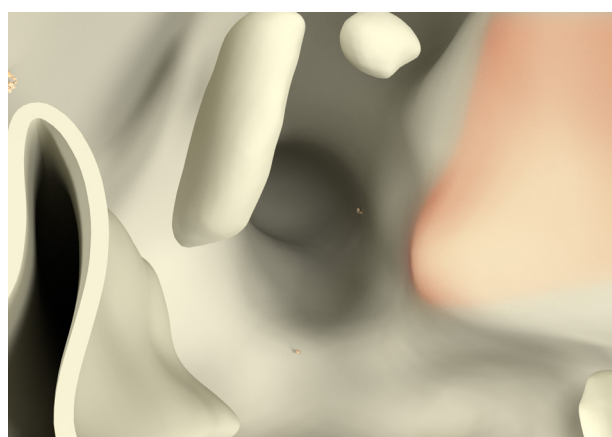

## References

**Antibody:** Cell Signaling 4691

**PDB Identifier:** 5buu

### Literature:

Dimmeler et al., 1999, Nature

Fulton et al., 1999, Nature

Gobert et al., 2008, J. Neurochem.

Karpova et al., 2006, J. Neurosci.

Kennedy et al., 1997, Genes & Dev.

Kennedy et al., 1999, Mol. Cell. Biol.

Man et al., 2003, Neuron

Pen et al., 2016, Hippocampus

Qin et al., 2005, Genes & Dev.

Schratt et al., 2004, J. Neurosci.

Wang et al., 2011, Br. J. Pharmacol.

Znamensky et al., 2003, J. Neurosci.



**$\alpha/\beta$ -SNAP (Genes: Napa and Napb, Uniprot ID: P54921 and P85969)**

**Known function:** Bring SNARE complexes to NSF for disassembly

**Known organization:** Cytosolic

**Known Interactions:** SNARE complexes of different compositions, NSF

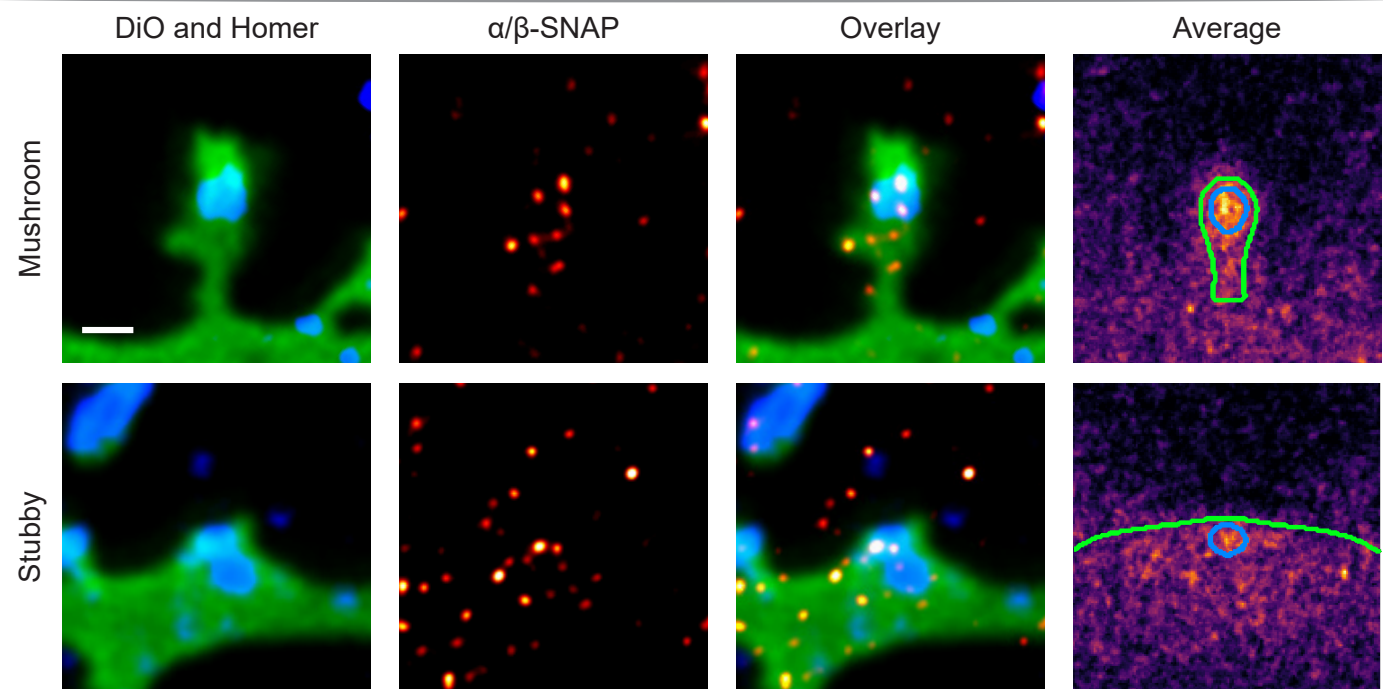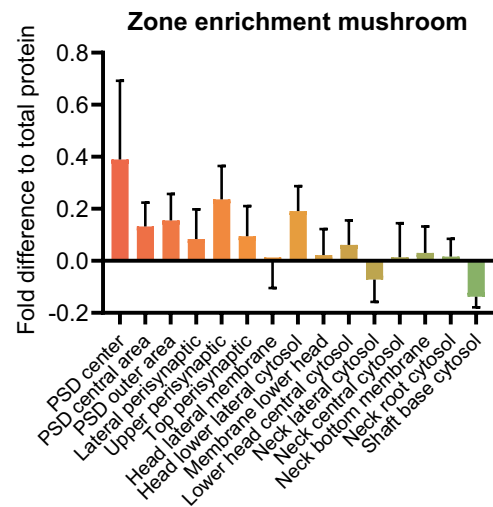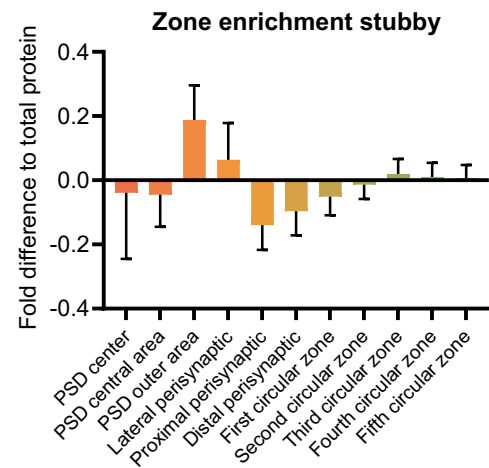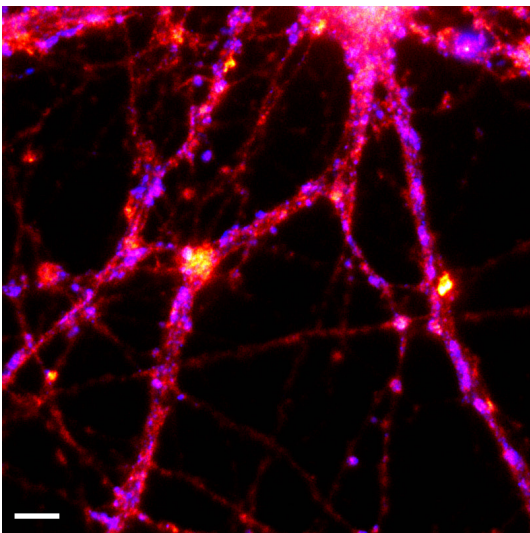

|                        |                            |                    |
|------------------------|----------------------------|--------------------|
| Whole cell copy number | 9929012.8 $\pm$ 386529.3   |                    |
| Spine copy number      | 2076.6 $\pm$ 354.0         |                    |
| Function               | SNAREs and assoc. proteins |                    |
|                        | Mushroom                   | Stubby             |
| Spine copy number      | 1948.9 $\pm$ 332.2         | 2351.8 $\pm$ 400.9 |
| % of total protein     | 0.3 $\pm$ 0.1%             | 0.3 $\pm$ 0.1%     |
| Molarity ( $\mu$ M)    | 24.8 $\pm$ 4.2             | 22.2 $\pm$ 3.8     |
| PSD copy number        | 498 $\pm$ 84.9             | 461 $\pm$ 78.6     |
| % in PSD               | 25.6 $\pm$ 4.4%            | 19.6 $\pm$ 3.3%    |



|          | Spine copy number  | % of total protein | Molarity ( $\mu\text{M}$ ) | PSD copy number |
|----------|--------------------|--------------------|----------------------------|-----------------|
| Mushroom | $1948.9 \pm 332.2$ | $0.3 \pm 0.1\%$    | $24.8 \pm 4.2$             | $498 \pm 84.9$  |
| Stubby   | $2351.8 \pm 400.9$ | $0.3 \pm 0.1\%$    | $22.2 \pm 3.8$             | $461 \pm 78.6$  |

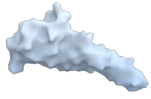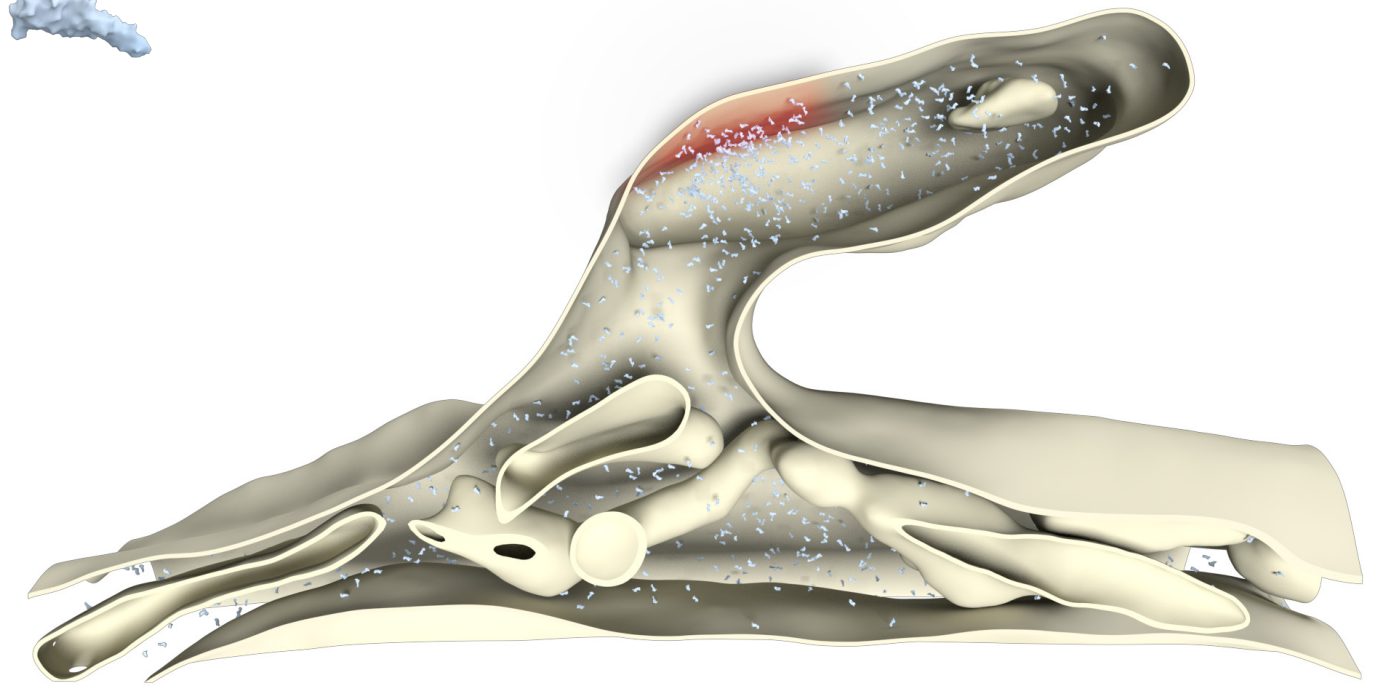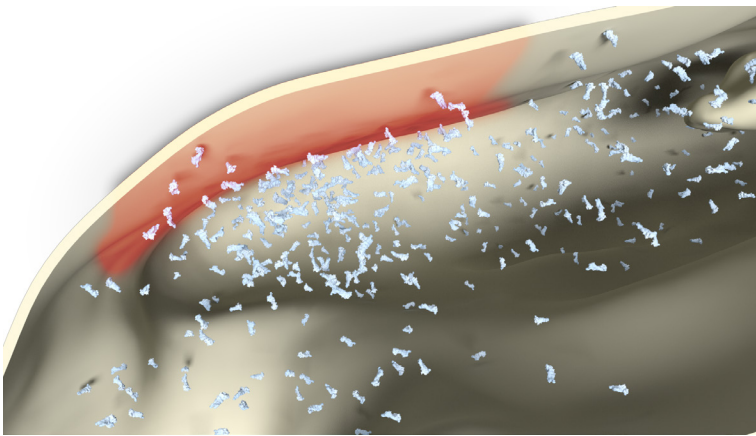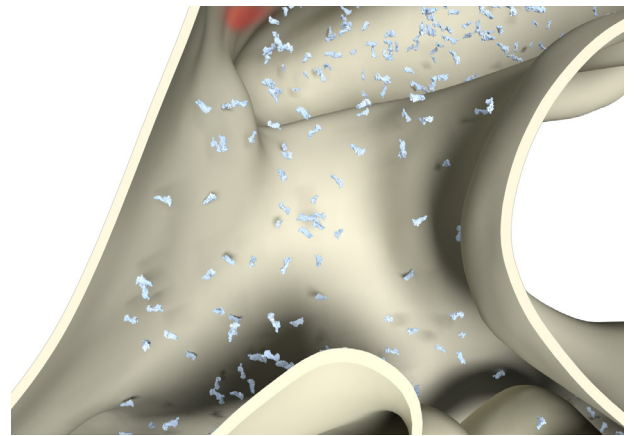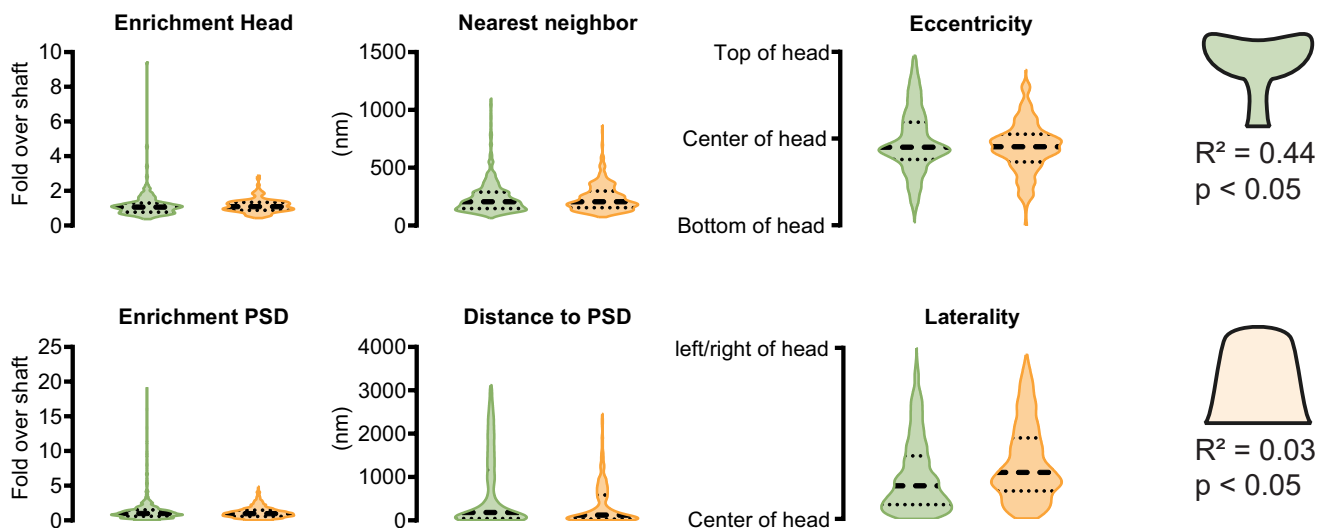

|          | Spine copy number  | % of total protein | Molarity ( $\mu\text{M}$ ) | PSD copy number |
|----------|--------------------|--------------------|----------------------------|-----------------|
| Mushroom | $1948.9 \pm 332.2$ | $0.3 \pm 0.1\%$    | $24.8 \pm 4.2$             | $498 \pm 84.9$  |
| Stubby   | $2351.8 \pm 400.9$ | $0.3 \pm 0.1\%$    | $22.2 \pm 3.8$             | $461 \pm 78.6$  |

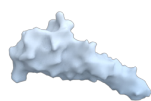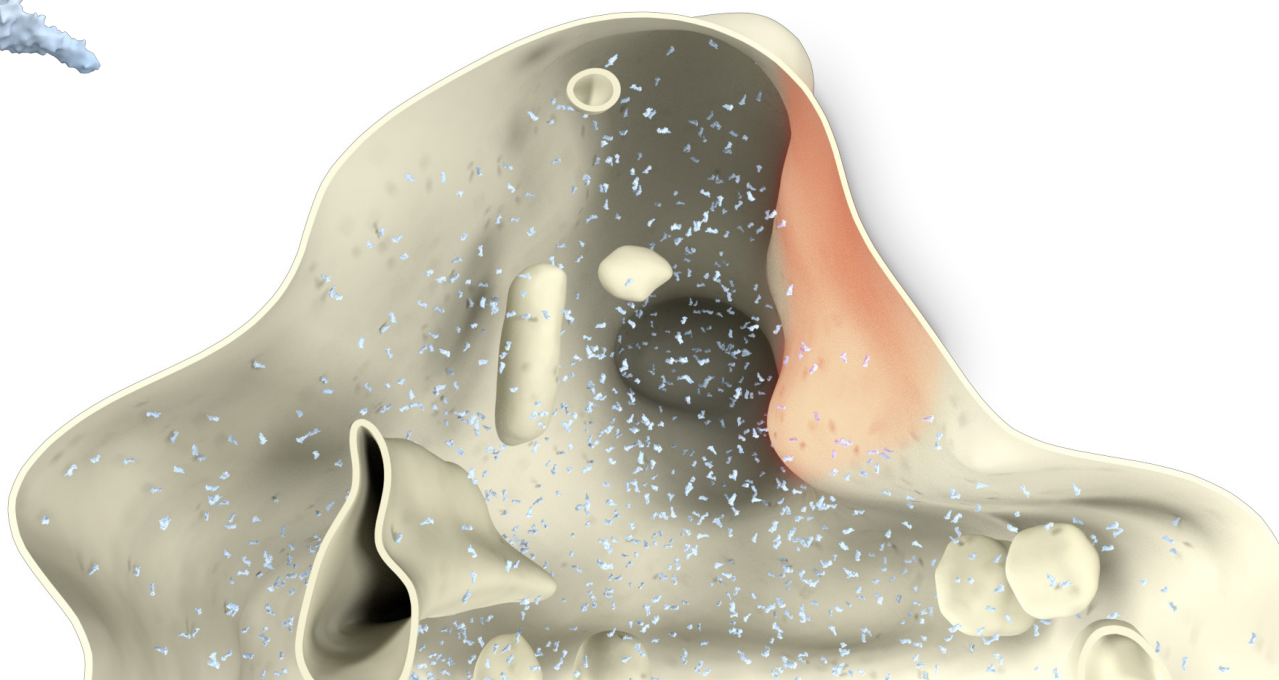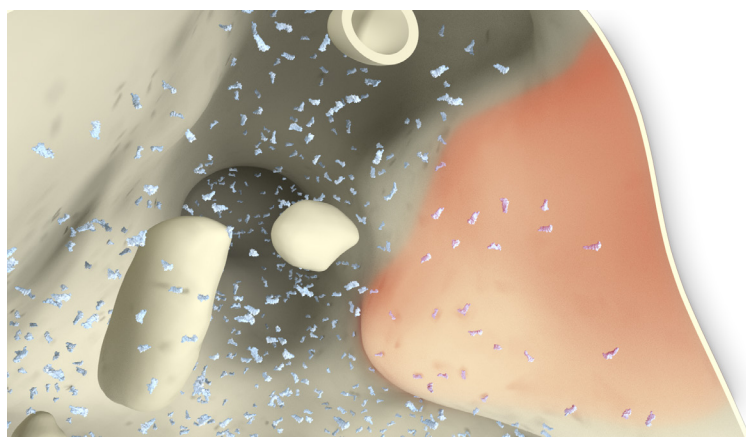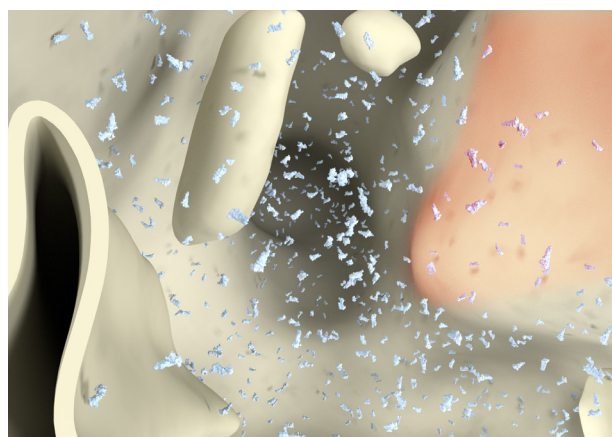

## References

**Antibody:** Reinhard Jahn, clone 77.2

**PDB Identifier:** 6mdm

### Literature:

Clary et al., 1990, Cell

Hanson et al., 1995, J. Biol. Chem.

Hohl et al., 1998, Mol. Cell

Söllner et al., 1993a, Nature

Söllner et al., 1993b, Cell

Weidman et al., 1989, J. Cell. Biol.

Whiteheart et al., 1993, Nature

Wilson et al., 1989, Nature

AP180 (Gene: Snap91, Uniprot ID: Q05140)

Known function: Initiation of clathrin coat formation, AMPAR endocytosis

Known organization: Cytosolic or membrane-associated

Known Interactions: Clathrin

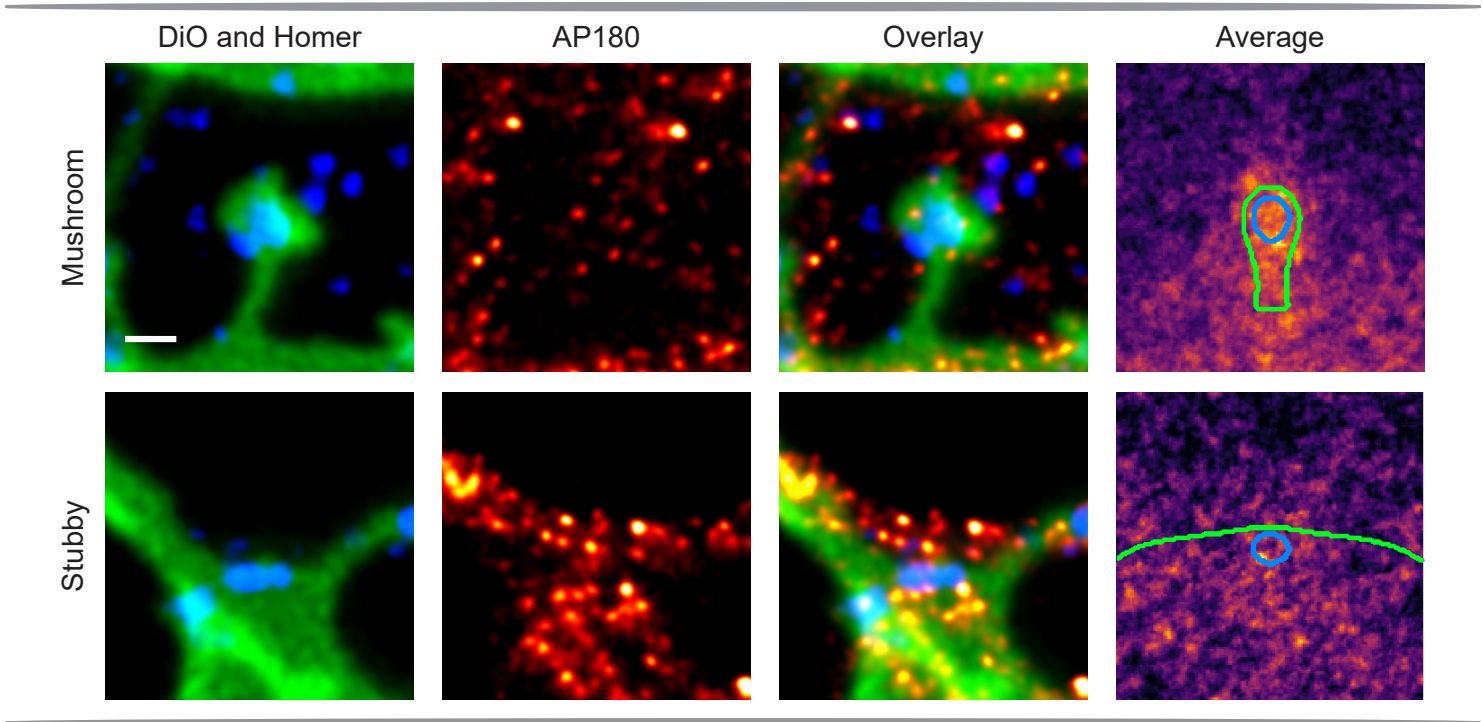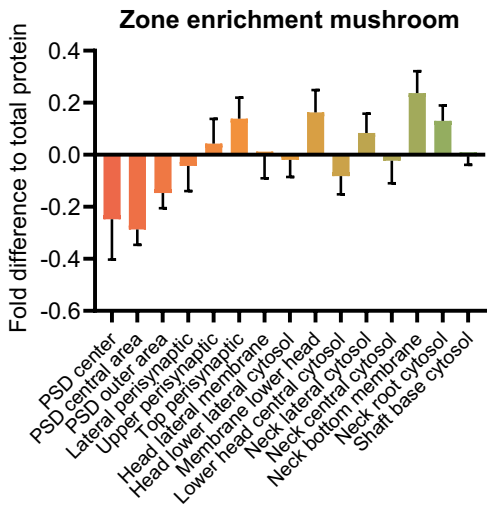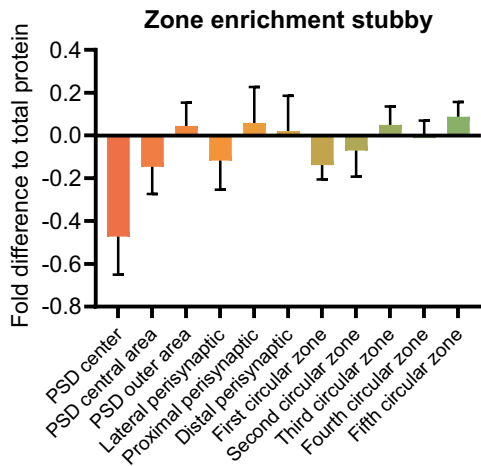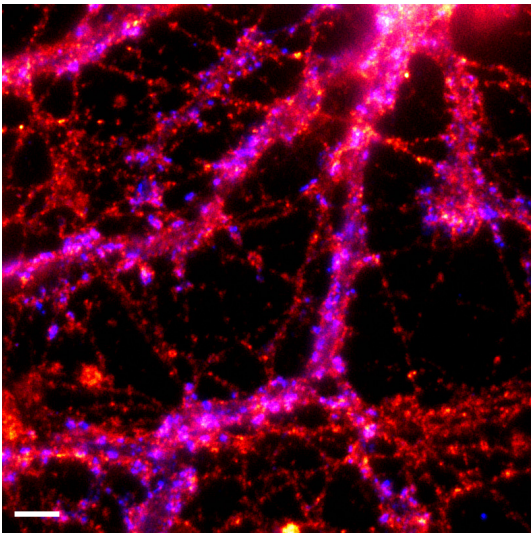

|                        |                            |             |
|------------------------|----------------------------|-------------|
| Whole cell copy number | 195342.7 ± 99496.9         |             |
| Spine copy number      | 15.1 ± 10.0                |             |
| Function               | Exo-/Endocytosis cofactors |             |
|                        | Mushroom                   | Stubby      |
| Spine copy number      | 14.1 ± 9.3                 | 15.0 ± 9.9  |
| % of total protein     | 0.0 ± 0.0%                 | 0.0 ± 0.0%  |
| Molarity (μM)          | 0.2 ± 0.1                  | 0.1 ± 0.1   |
| PSD copy number        | 0 ± 0.0                    | 2 ± 1.3     |
| % in PSD               | 0.0 ± 0.0%                 | 13.3 ± 8.8% |



|          | Spine copy number | % of total protein | Molarity ( $\mu\text{M}$ ) | PSD copy number |
|----------|-------------------|--------------------|----------------------------|-----------------|
| Mushroom | $14.1 \pm 9.3$    | $0.0 \pm 0.0\%$    | $0.2 \pm 0.1$              | $0 \pm 0.0$     |
| Stubby   | $15.0 \pm 9.9$    | $0.0 \pm 0.0\%$    | $0.1 \pm 0.1$              | $2 \pm 1.3$     |

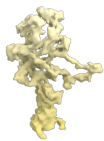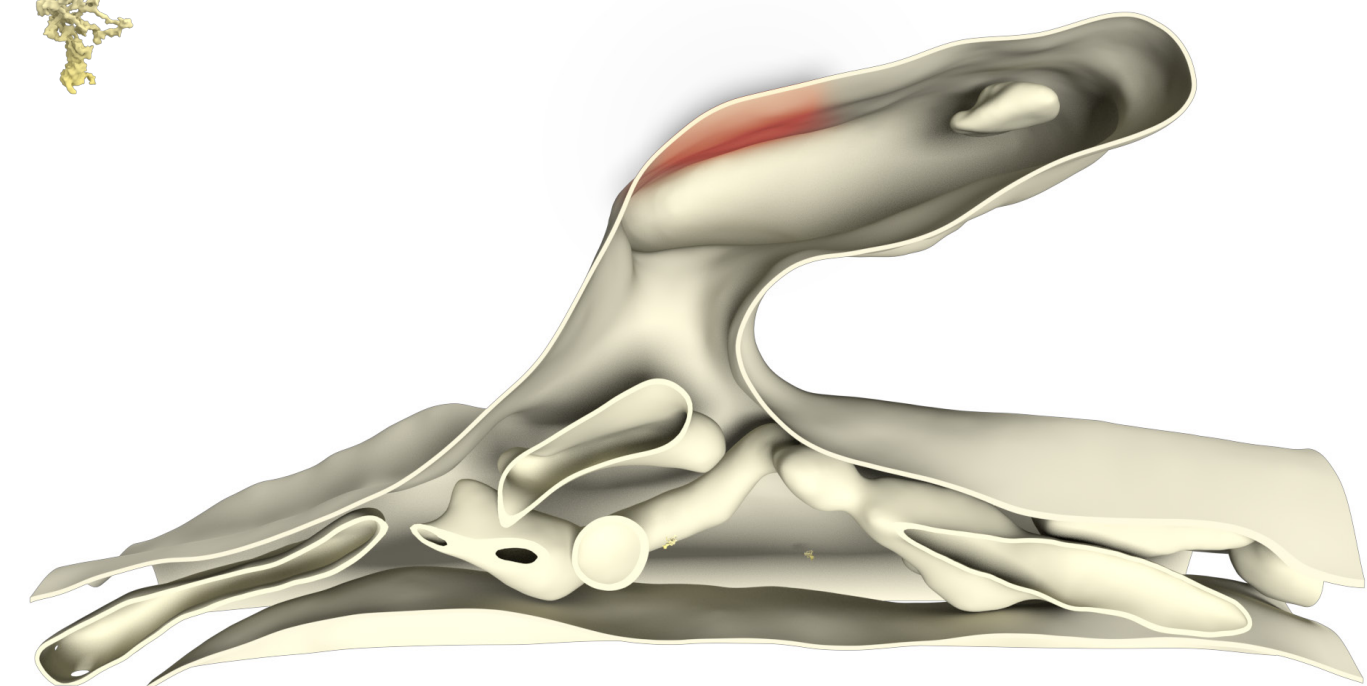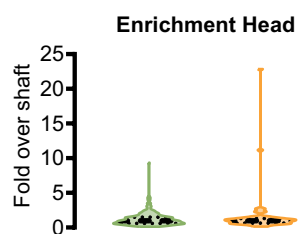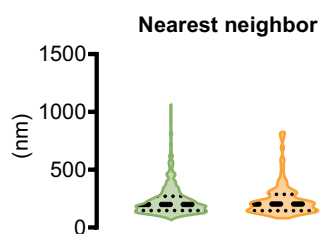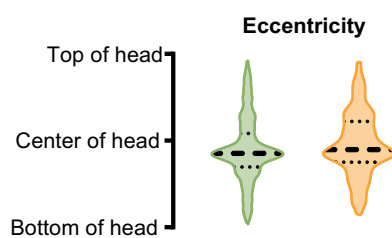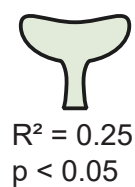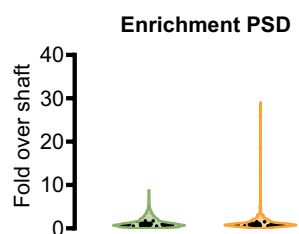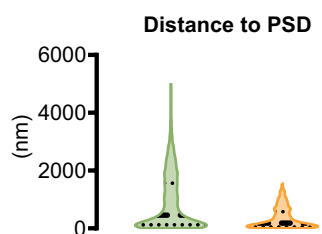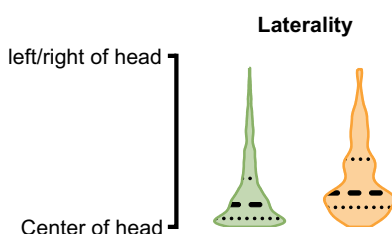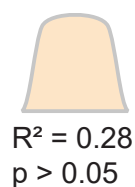

|          | Spine copy number | % of total protein | Molarity ( $\mu\text{M}$ ) | PSD copy number |
|----------|-------------------|--------------------|----------------------------|-----------------|
| Mushroom | $14.1 \pm 9.3$    | $0.0 \pm 0.0\%$    | $0.2 \pm 0.1$              | $0 \pm 0.0$     |
| Stubby   | $15.0 \pm 9.9$    | $0.0 \pm 0.0\%$    | $0.1 \pm 0.1$              | $2 \pm 1.3$     |

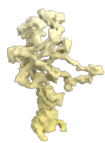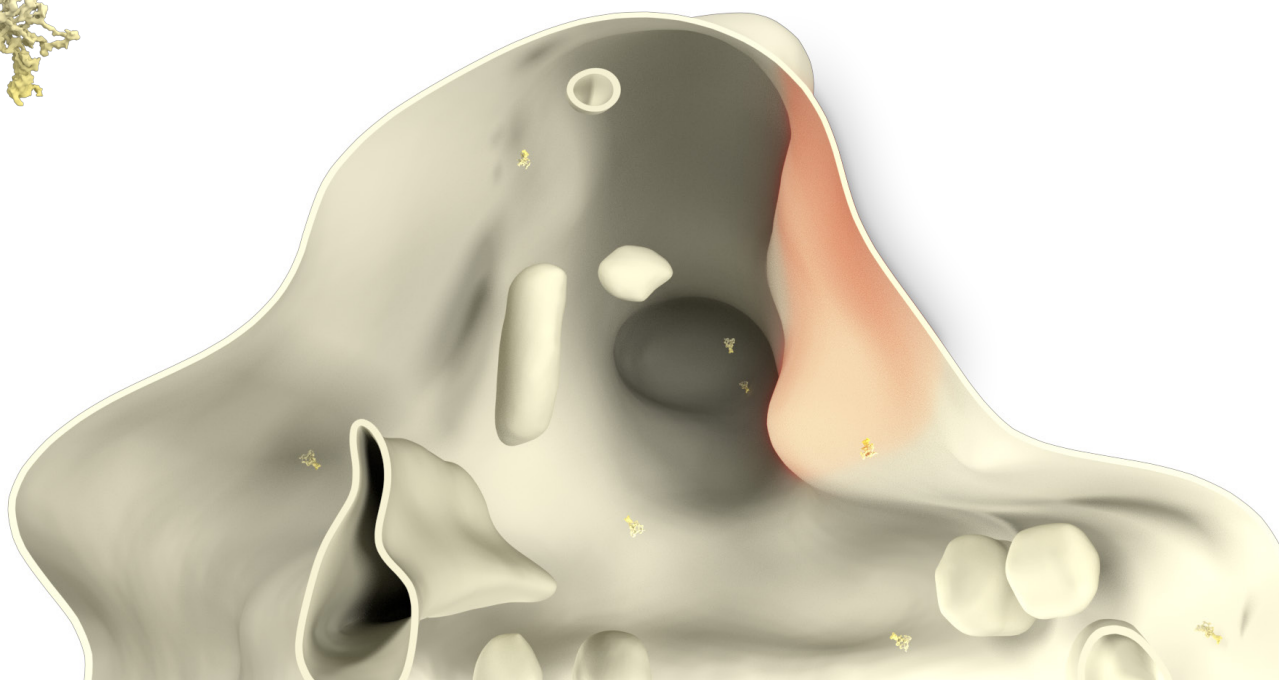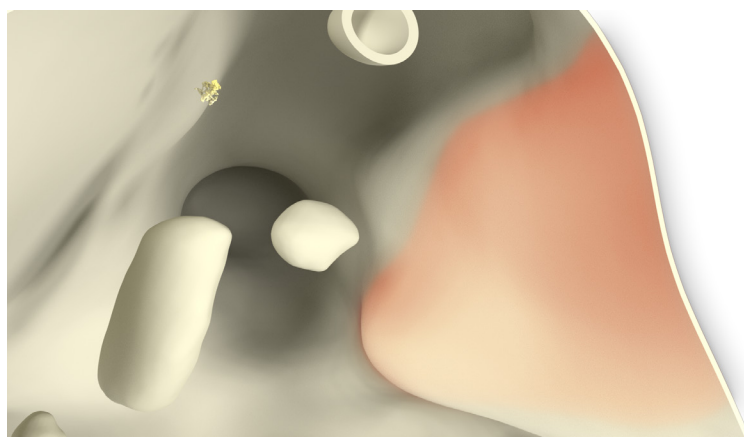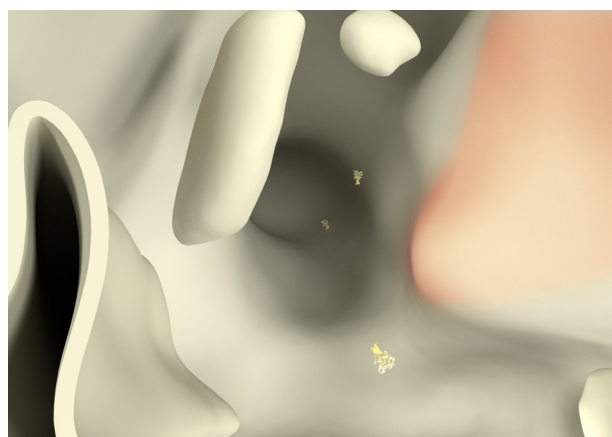

## References

**Antibody:** Synaptic Systems 155 003

**PDB Identifier:** Modelled with I-TASSER

### Literature:

Ahle and Ungewickell, 1986, EMBO J.

Burbea et al., 2002, Neuron

Hering et al., 2003, J. Neurosci.

Keen, 1987, J. Cell. Biol.

Lindner and Ungewickell, 1992, J. Biol. Chem.

Murphy et al., 1991, J. Biol. Chem.

Norris et al., 1995, J. Biol. Chem.

Sousa et al., 1992, J. Neurosci.

Ye and Lafer, 1995, J. Biol. Chem.

Zhou et al., 1992, J. Neurosci.

## APP (Gene: App, Uniprot ID: P08592)

**Known function:** Exact function unknown, involved in neurite growth and LTP, Precursor protein of A $\beta$ , the hallmark of Alzheimer's disease

**Known organization:** Transmembrane protein, Also secreted to extracellular matrix

**Known Interactions:** None

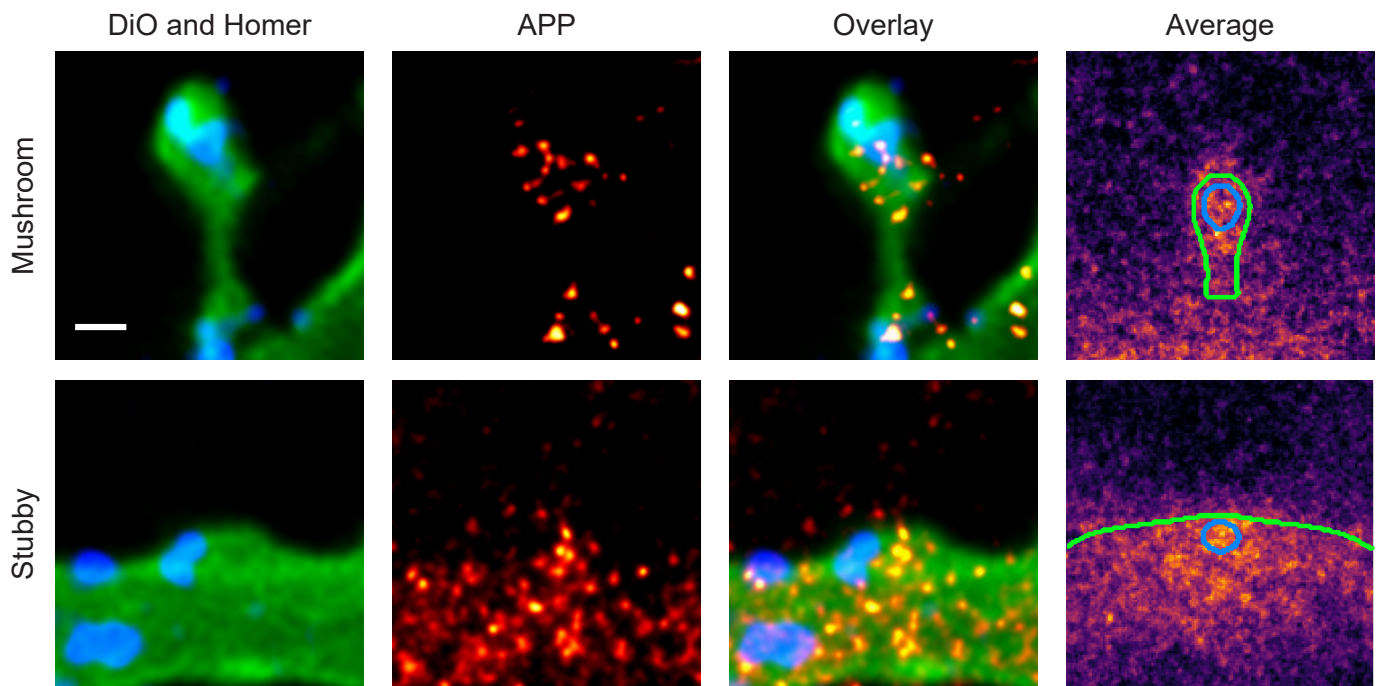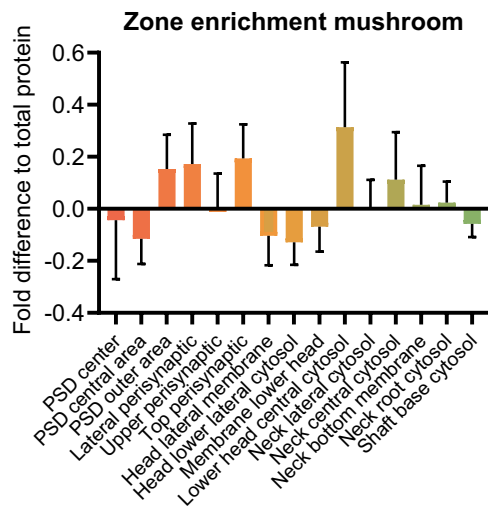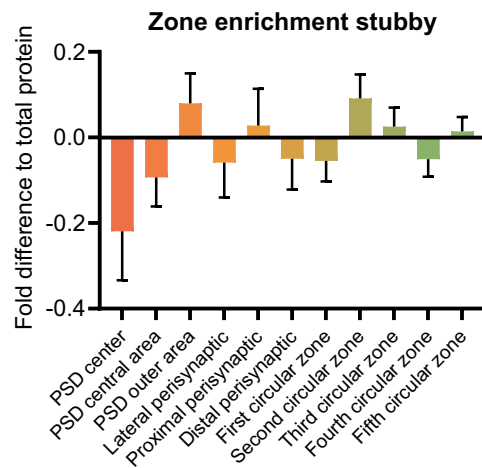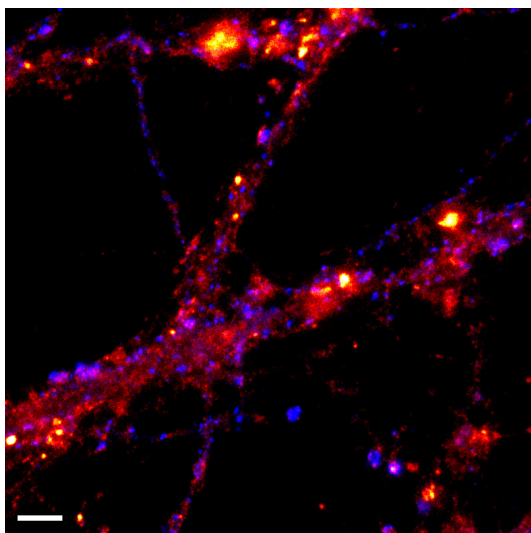

|                        |                    |              |
|------------------------|--------------------|--------------|
| Whole cell copy number | 769809.8 ± 74017.4 |              |
| Spine copy number      | 121.2 ± 29.9       |              |
| Function               | Signaling          |              |
|                        | Mushroom           | Stubby       |
| Spine copy number      | 87.5 ± 21.6        | 152.2 ± 37.6 |
| % of total protein     | 0.0 ± 0.0%         | 0.1 ± 0.0%   |
| Molarity (μM)          | 1.1 ± 0.3          | 1.4 ± 0.4    |
| PSD copy number        | 4 ± 1.0            | 4 ± 1.0      |
| % in PSD               | 4.6 ± 1.1%         | 2.6 ± 0.6%   |

|          | Spine copy number | % of total protein | Molarity ( $\mu\text{M}$ ) | PSD copy number |
|----------|-------------------|--------------------|----------------------------|-----------------|
| Mushroom | $87.5 \pm 21.6$   | $0.0 \pm 0.0\%$    | $1.1 \pm 0.3$              | $4 \pm 1.0$     |
| Stubby   | $152.2 \pm 37.6$  | $0.1 \pm 0.0\%$    | $1.4 \pm 0.4$              | $4 \pm 1.0$     |

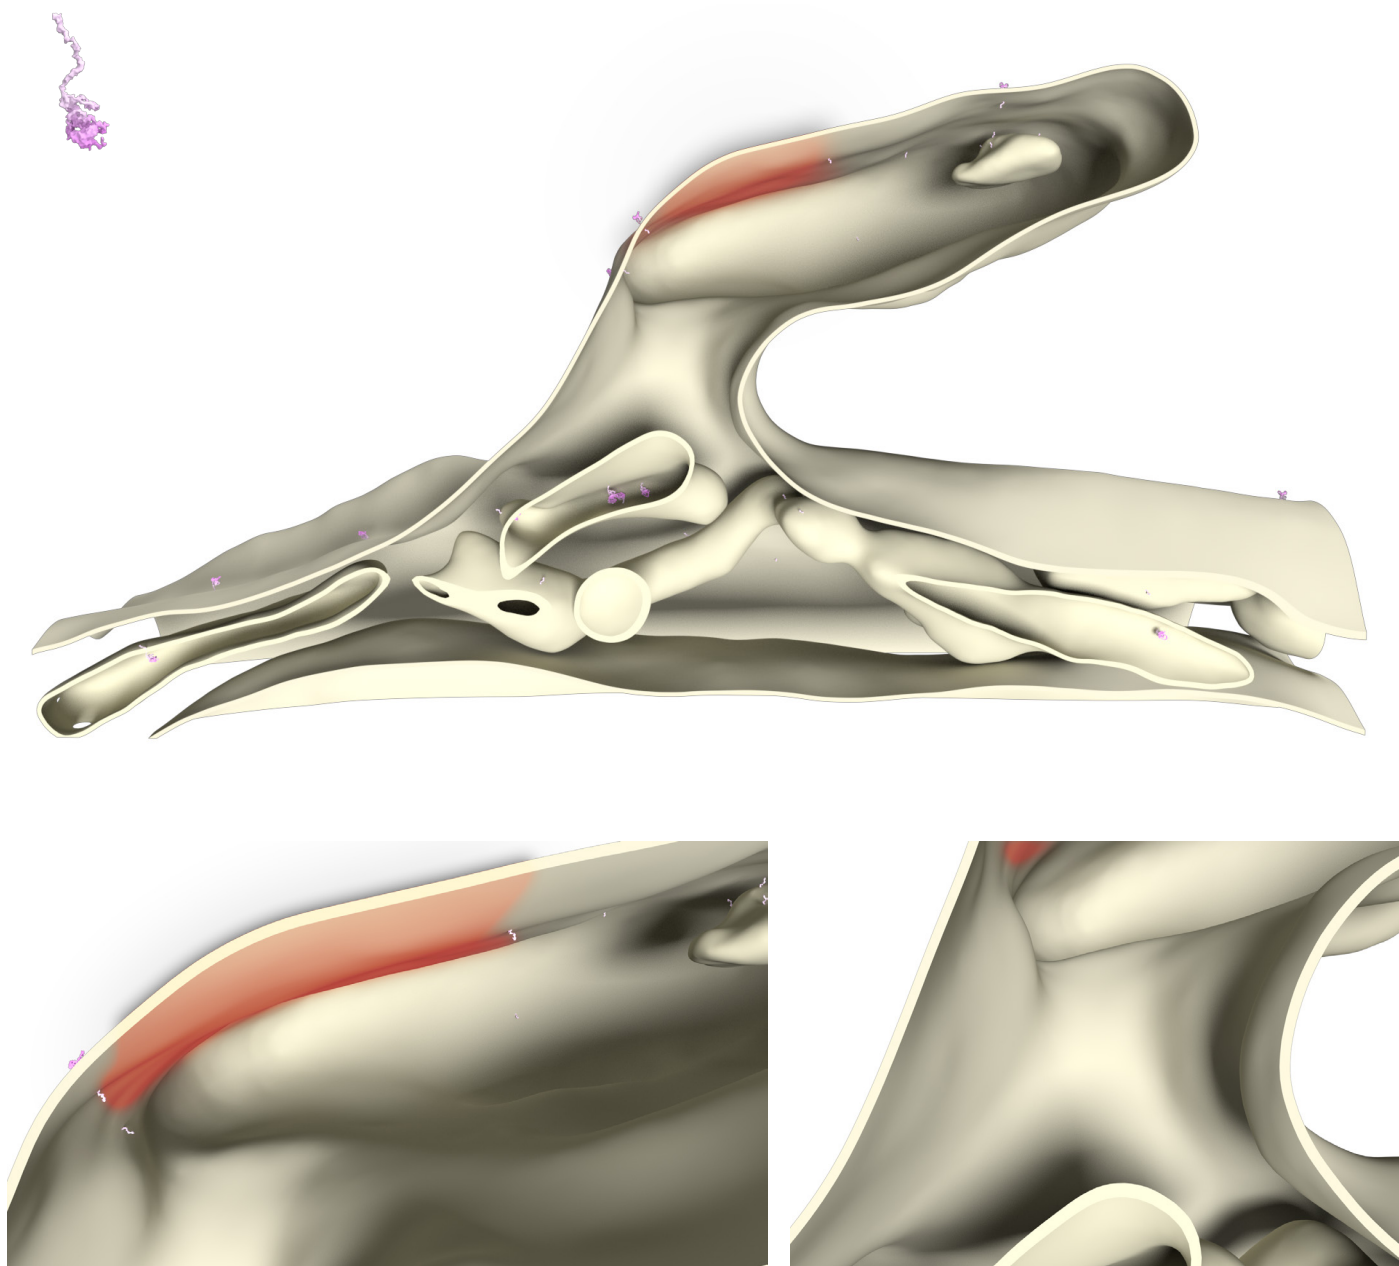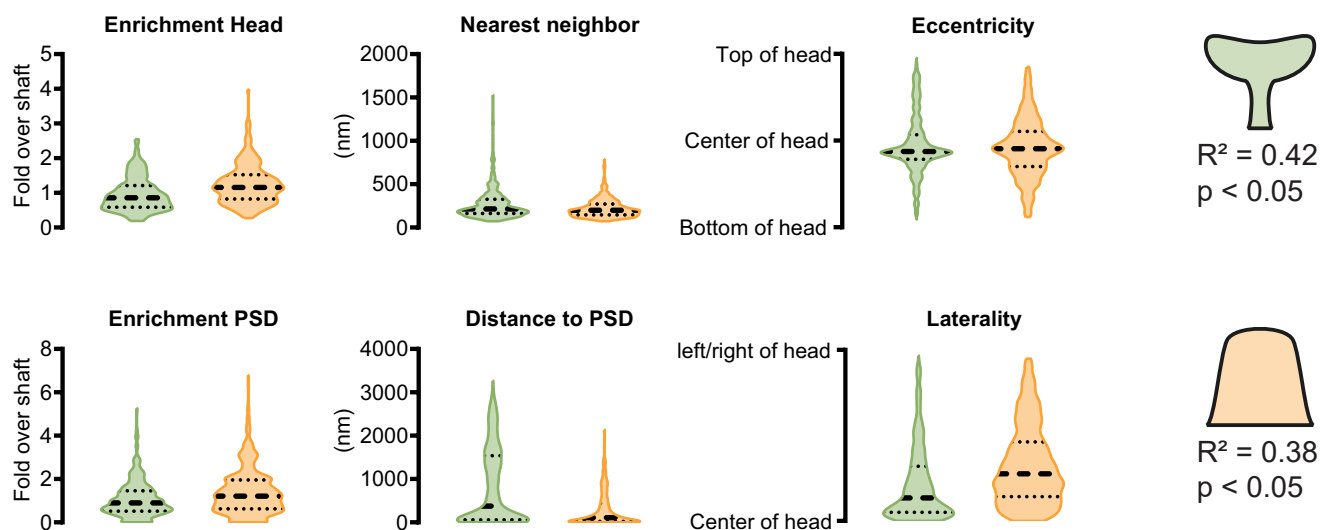



|          | Spine copy number | % of total protein | Molarity ( $\mu\text{M}$ ) | PSD copy number |
|----------|-------------------|--------------------|----------------------------|-----------------|
| Mushroom | $87.5 \pm 21.6$   | $0.0 \pm 0.0\%$    | $1.1 \pm 0.3$              | $4 \pm 1.0$     |
| Stubby   | $152.2 \pm 37.6$  | $0.1 \pm 0.0\%$    | $1.4 \pm 0.4$              | $4 \pm 1.0$     |

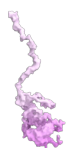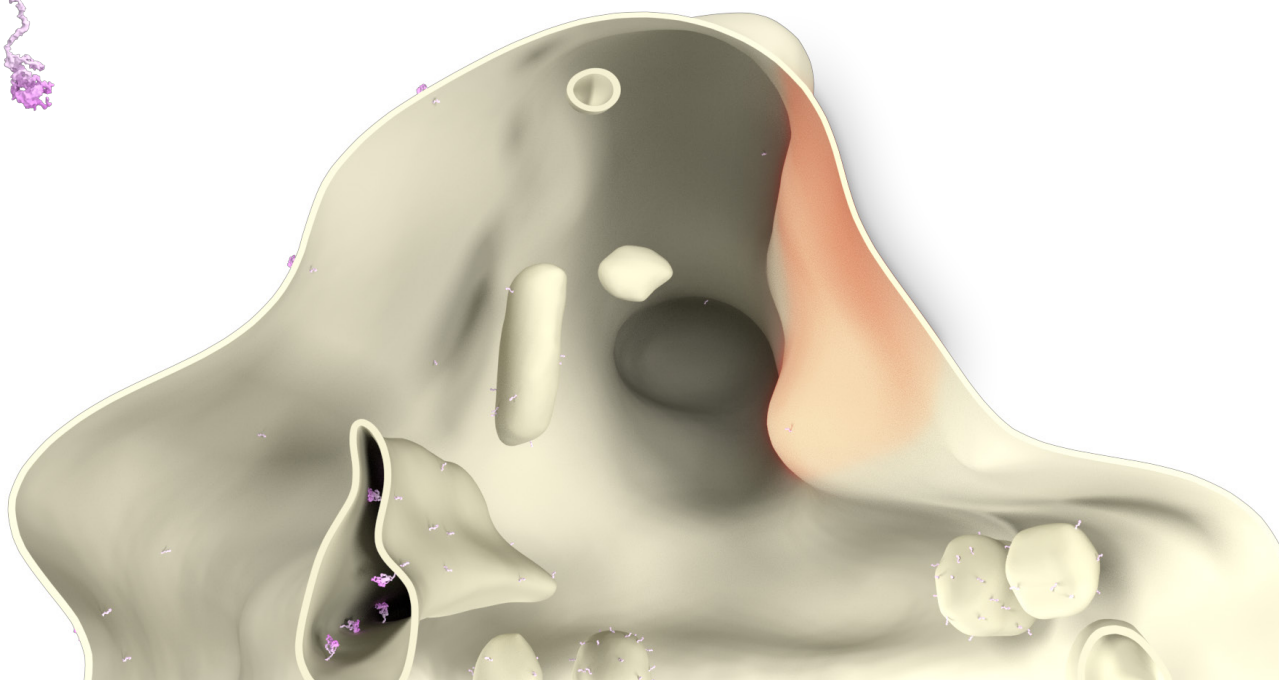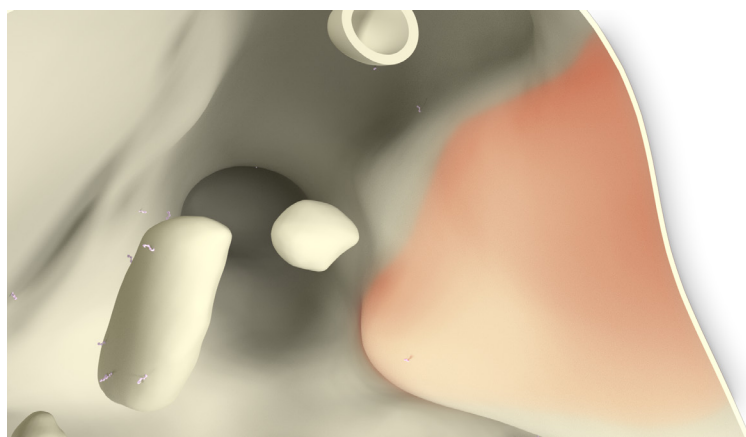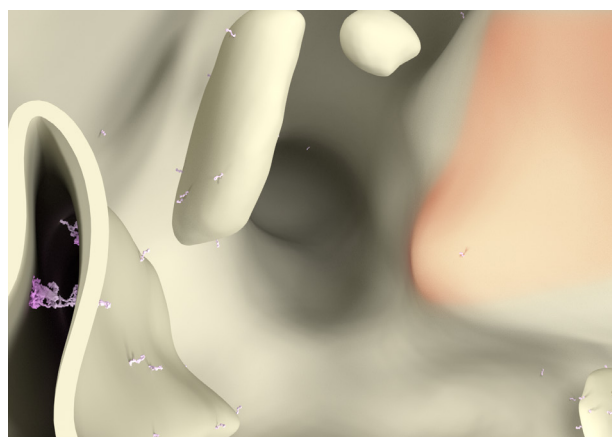

## References

**Antibody:** Merck-Millipore MAB-348

**PDB Identifier:** 2fkl, 4yno

### Literature:

Müller and Zheng, 2012, Cold Spring Harb. Perspect. Med.

Perez et al., 1997, J. Neurosci.

Simons et al., 1996, J. Neurosci.

Slunt et al., 1994, J. Biol. Chem.

Taylor et al., 2008, Neurobiol. Dis.

Young-Pearse et al., 2008, Neural Dev.



**Arc (Arg1.3, Gene: Arc, Uniprot ID: Q63053)**

**Known function:** master regulator of synaptic plasticity, required for LTP, also involved in LTD and homeostatic plasticity, facilitates GluR1 endocytosis, regulates actin polymerization

**Known organization:** Transported to activated synapses, can selfassemble into virion-like capsids

**Known Interactions:** CamKII, Drebrin, Dynamin2, GluN2A, GluN2B, GluR1, PSD95

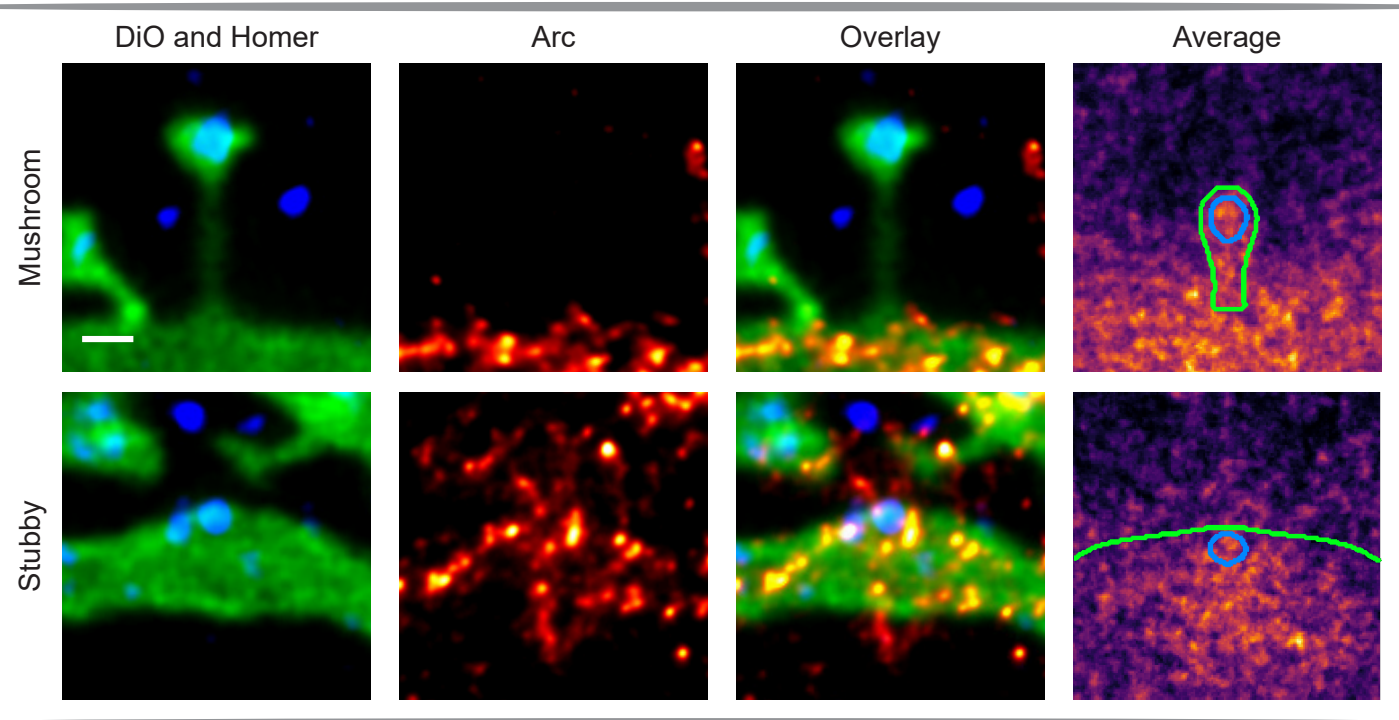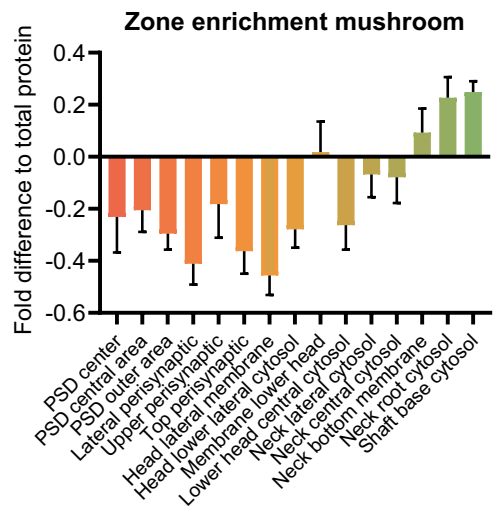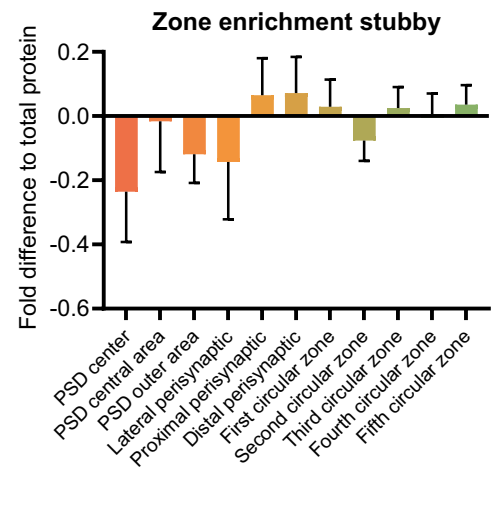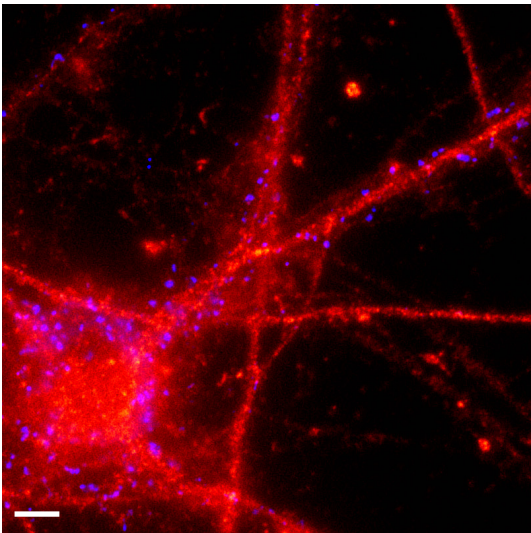

|                        |                                       |        |
|------------------------|---------------------------------------|--------|
| Whole cell copy number | 23101133.8 ± 6022734.4 (extrapolated) |        |
| Spine copy number      | 3291.3 (from literature)              |        |
| Function               | Signaling                             |        |
|                        | Mushroom                              | Stubby |
| Spine copy number      | 2885.4                                | 3549.6 |
| % of total protein     | 0.6%                                  | 0.7%   |
| Molarity (µM)          | 36.6                                  | 33.5   |
| PSD copy number        | 543                                   | 536    |
| % in PSD               | 18.8%                                 | 15.1%  |

|          | Spine copy number | % of total protein | Molarity ( $\mu\text{M}$ ) | PSD copy number |
|----------|-------------------|--------------------|----------------------------|-----------------|
| Mushroom | 2885.4            | 0.6%               | 36.6                       | 543             |
| Stubby   | 3549.6            | 0.7%               | 33.5                       | 536             |

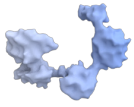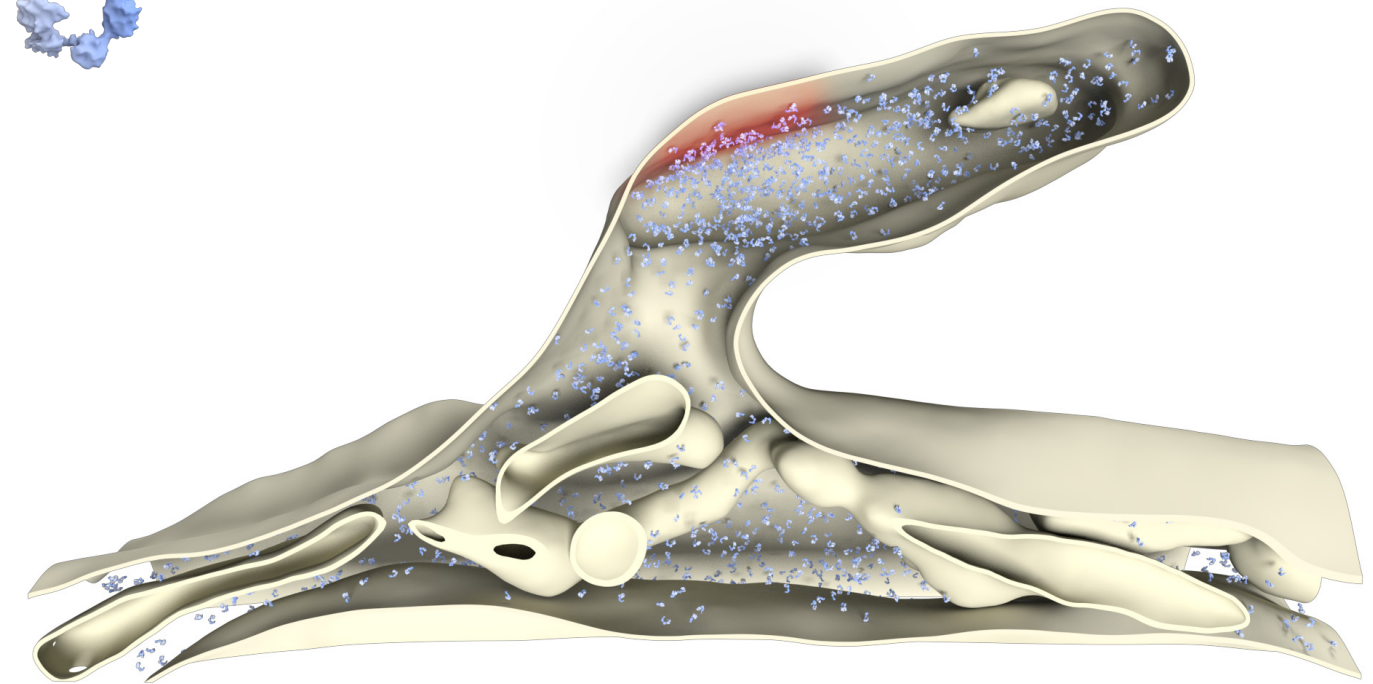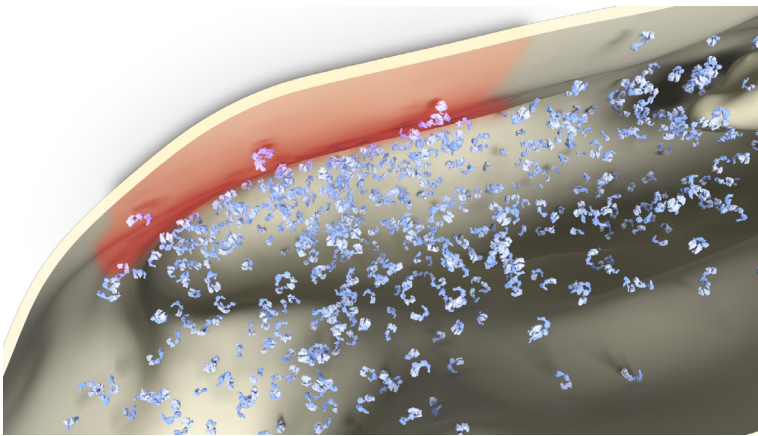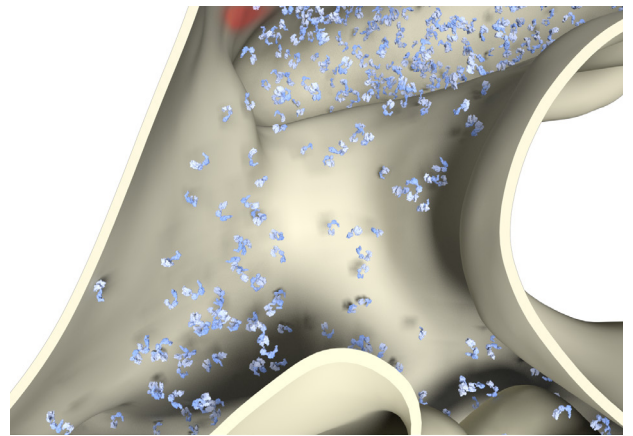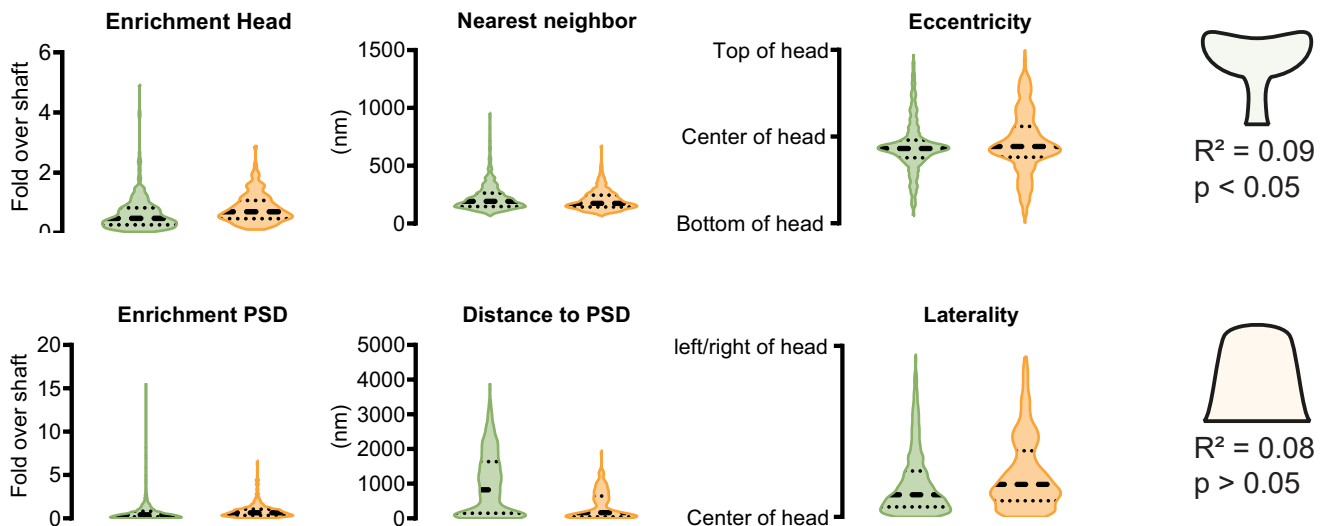



|          | Spine copy number | % of total protein | Molarity ( $\mu\text{M}$ ) | PSD copy number |
|----------|-------------------|--------------------|----------------------------|-----------------|
| Mushroom | 2885.4            | 0.6%               | 36.6                       | 543             |
| Stubby   | 3549.6            | 0.7%               | 33.5                       | 536             |

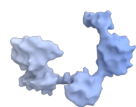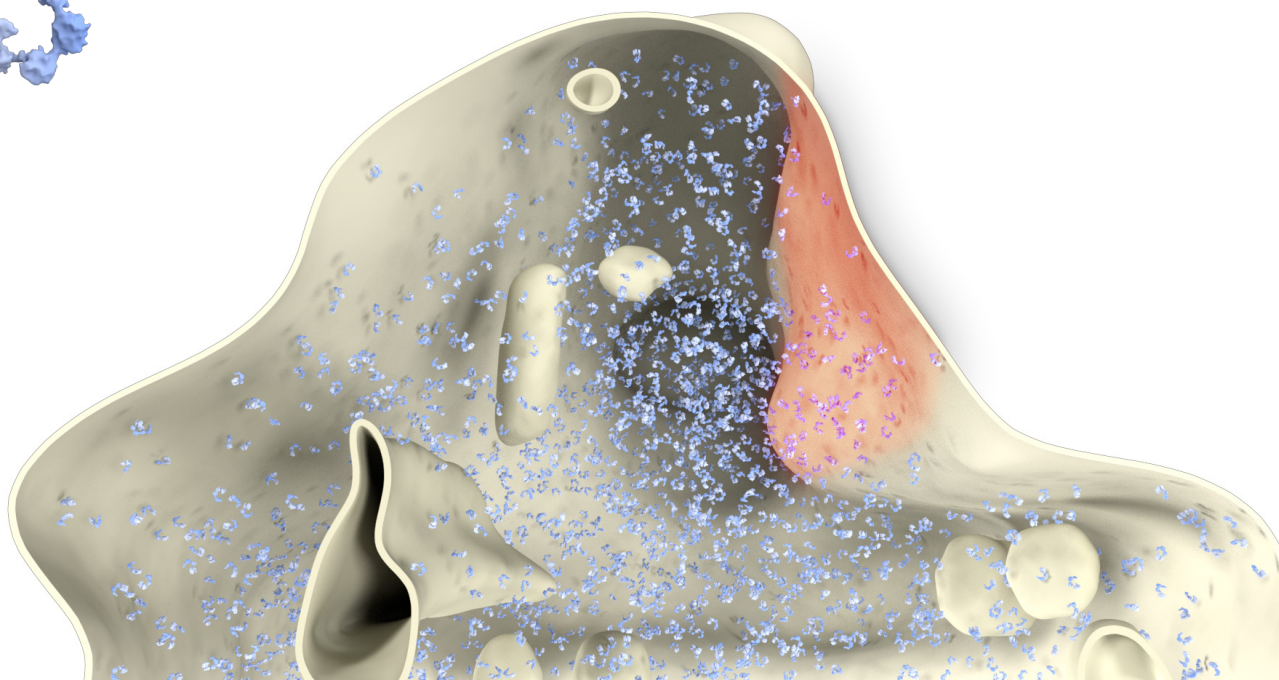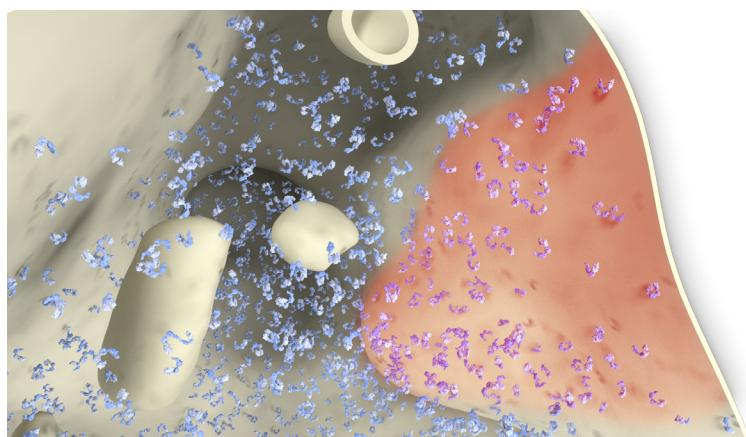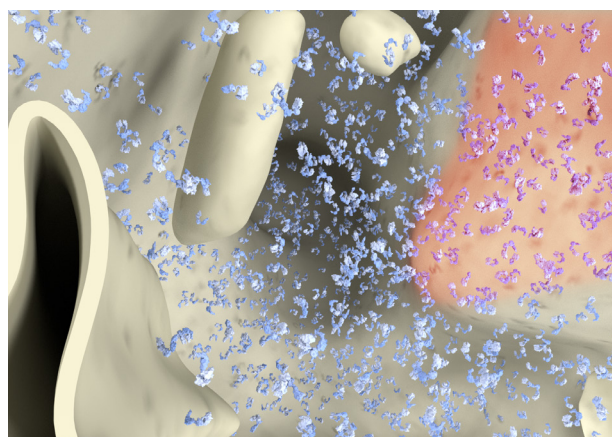

## References

**Antibody:** Synaptic Systems 156 003

**PDB Identifier:** 4x3x, 3x3i

### Literature:

Beique et al., 2011, Proc. Natl. Acad. Sci. U S A

Chowdury et al., 2006, Neuron

Guzowski et al., 2000, J. Neurosci.

Korb and Finkbeiner, 2011, Trends in Neurosci.

Korb et al., 2013, Nat. Neurosci.

Messaoudi et al., 2007, J. Neurosci.

Nair et al., 2017, Front. Synaptic Neurosci.

Nielsen et al., 2019, Structure

Peebles et al., 2010, Proc. Natl. Acad. Sci. U S A

Plath et al., 2006, Neuron

Shepherd & Bear, 2011, Nat. Neurosci.

Wu et al., 2017, Cell

Zhang et al., 2019, Mol. Cell

**BDNF (Gene: Bdnf, Uniprot ID: P23363)**

**Known function:** Important neurotrophin, Involved in neuronal growth and plasticity

**Known organization:** In ER and secretory granules

**Known Interactions:** TrkB, LNGFR

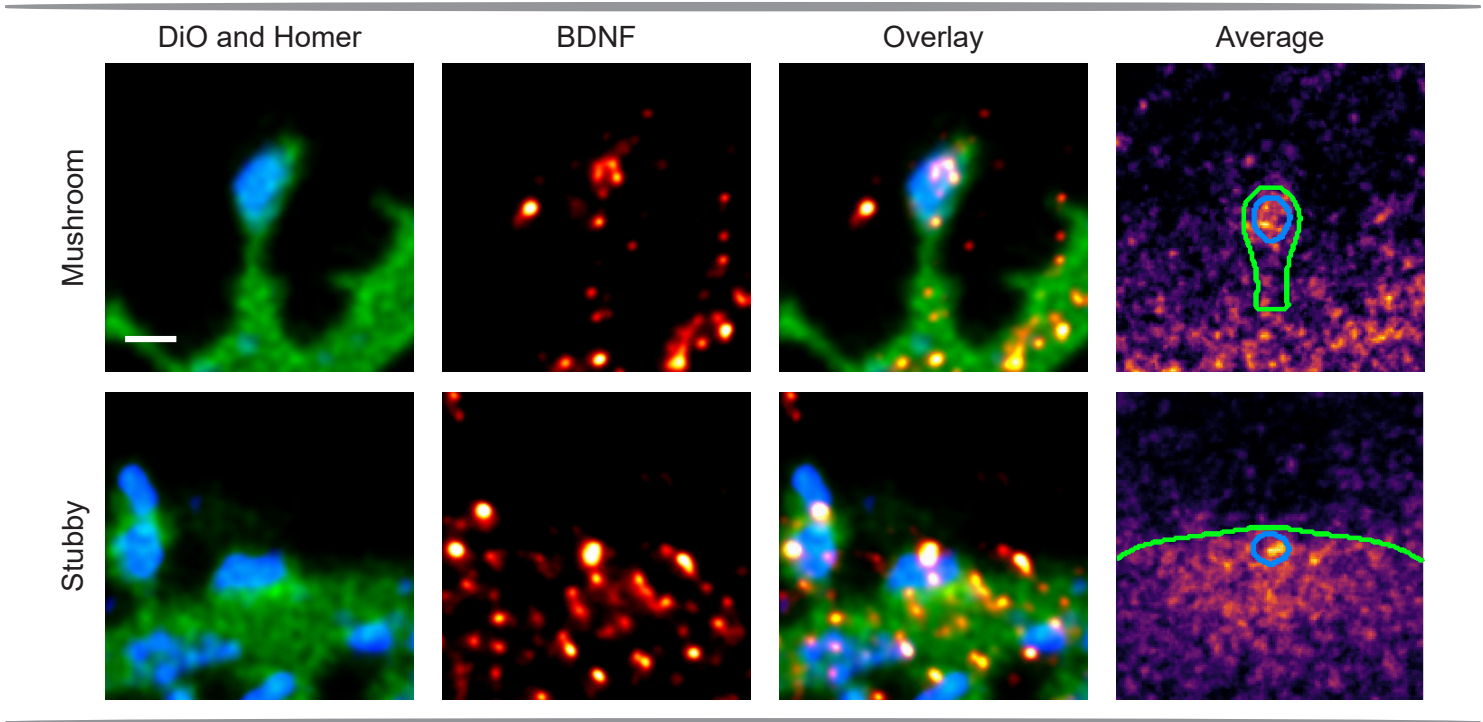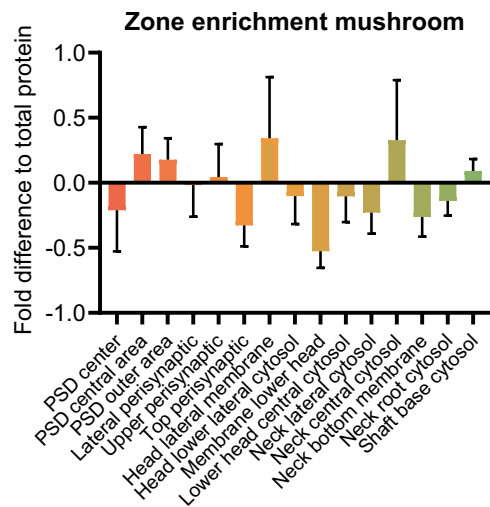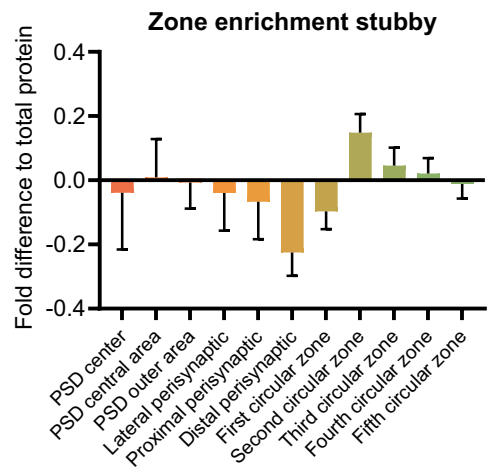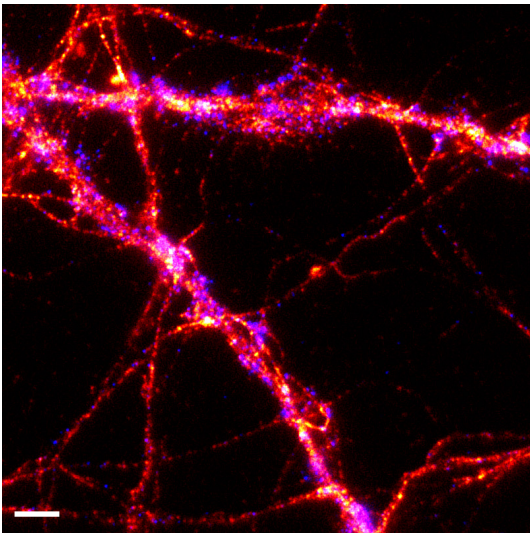

|                        |                       |              |
|------------------------|-----------------------|--------------|
| Whole cell copy number | 316783.2<br>± 67934.0 |              |
| Spine copy number      | 70.9 ± 18.2           |              |
| Function               | Signaling             |              |
|                        | Mushroom              | Stubby       |
| Spine copy number      | 52.9 ± 13.6           | 100.8 ± 25.9 |
| % of total protein     | 0.0 ± 0.0%            | 0.0 ± 0.0%   |
| Molarity (μM)          | 0.7 ± 0.2             | 1.0 ± 0.2    |
| PSD copy number        | 0 ± 0.0               | 0 ± 0.0      |
| % in PSD               | 0.0 ± 0.0%            | 0.0 ± 0.0%   |

|          | Spine copy number | % of total protein | Molarity ( $\mu\text{M}$ ) | PSD copy number |
|----------|-------------------|--------------------|----------------------------|-----------------|
| Mushroom | $52.9 \pm 13.6$   | $0.0 \pm 0.0\%$    | $0.7 \pm 0.2$              | $0 \pm 0.0$     |
| Stubby   | $100.8 \pm 25.9$  | $0.0 \pm 0.0\%$    | $1.0 \pm 0.2$              | $0 \pm 0.0$     |

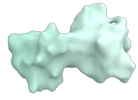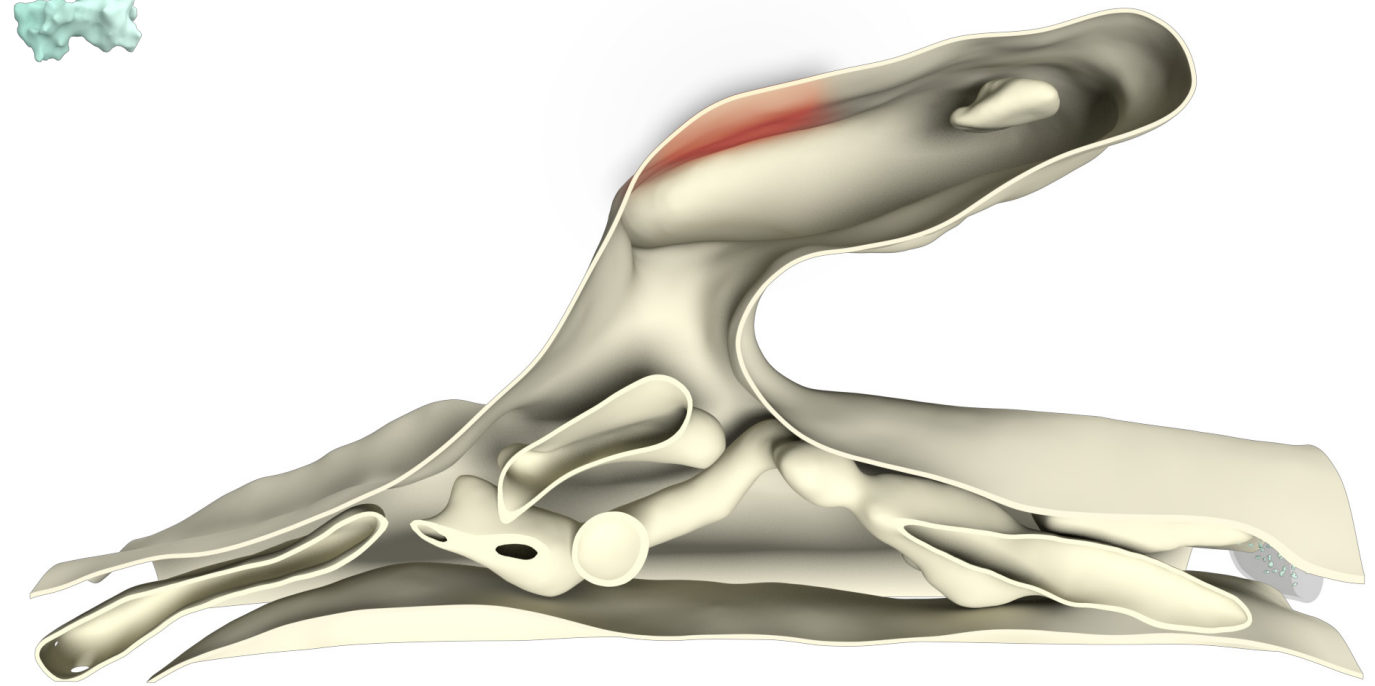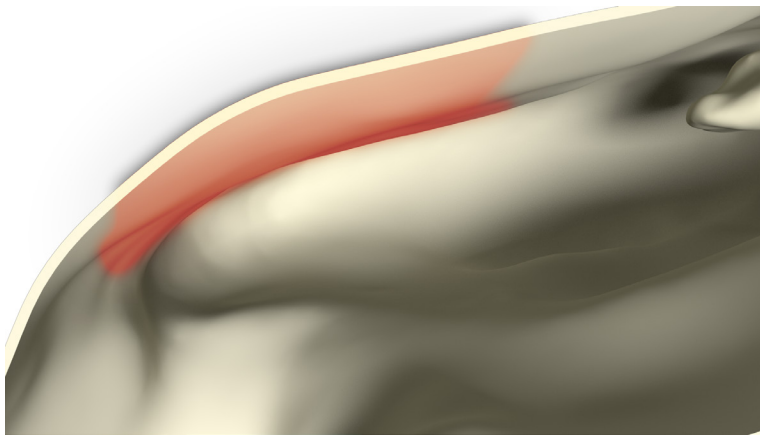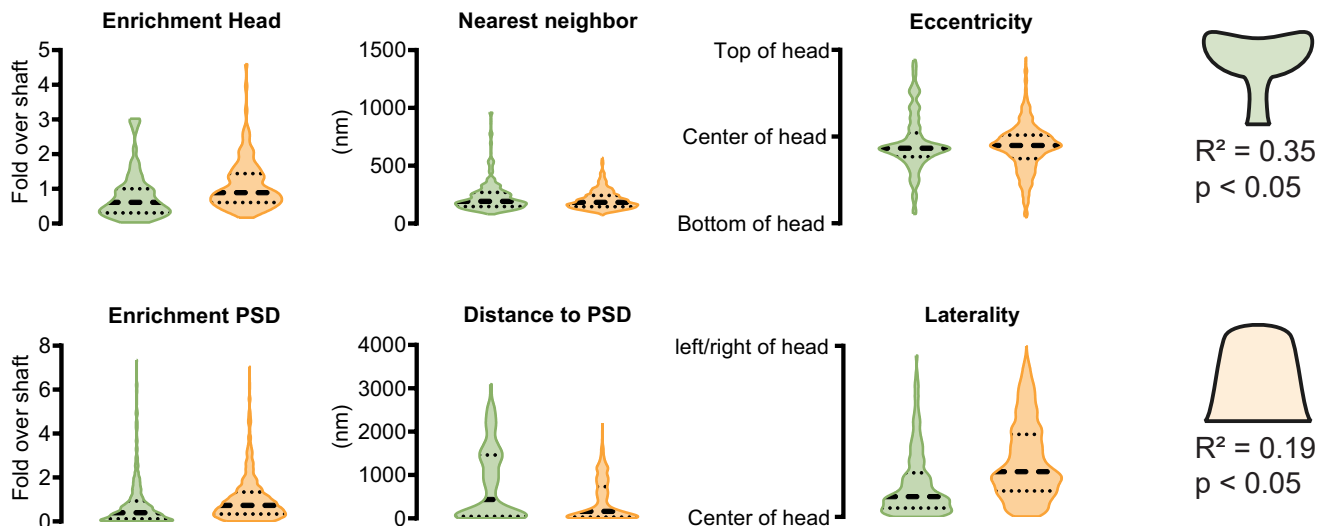



|          | Spine copy number | % of total protein | Molarity ( $\mu\text{M}$ ) | PSD copy number |
|----------|-------------------|--------------------|----------------------------|-----------------|
| Mushroom | $52.9 \pm 13.6$   | $0.0 \pm 0.0\%$    | $0.7 \pm 0.2$              | $0 \pm 0.0$     |
| Stubby   | $100.8 \pm 25.9$  | $0.0 \pm 0.0\%$    | $1.0 \pm 0.2$              | $0 \pm 0.0$     |

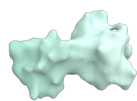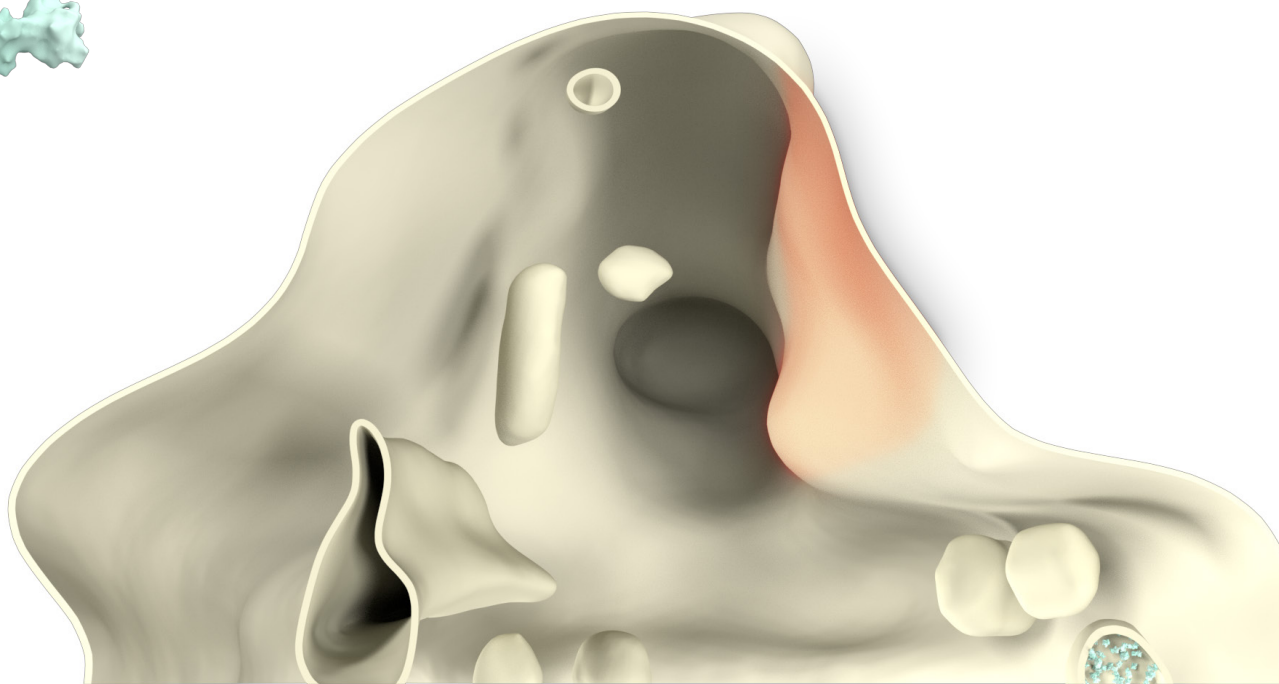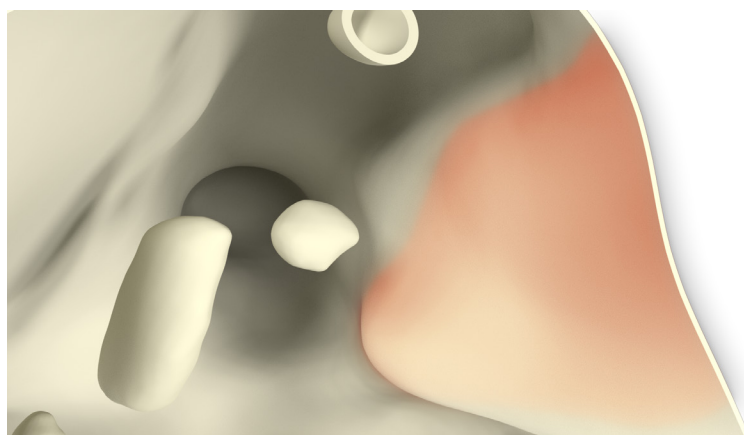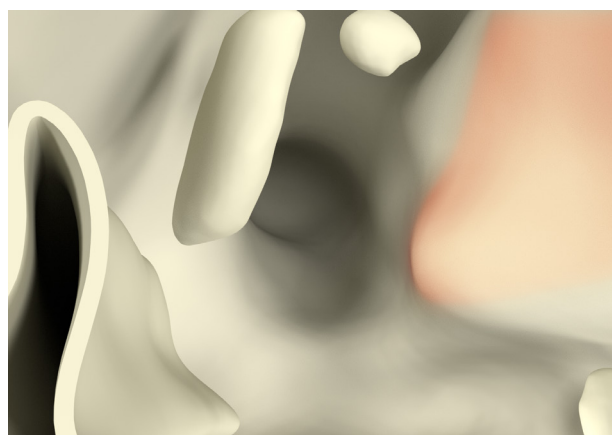

## References

**Antibody:** Biorbyt orb38809

**PDB Identifier:** 1b8m

### Literature:

Adachi et al., 2005, BMC Neurosci.

Hartmann et al., 2001, EMBO J.

Kohara et al., 2001, Science

Korte et al., 1995, Proc. Natl. Acad. Sci. U S A

Leal et al., 2015, Brain Res.

Minichiello et al., 2002, Neuron

Patterson et al., 1996, Neuron

Soppet et al., 1991, Cell

**$\beta$ -2-spectrin ( $\beta$ -3-spectrin, Gene: Sptnb2, Uniprot ID: Q9QWN8)**

**Known function:** Acts as spacer for actin rings

**Known organization:** Cytosolic

**Known Interactions:** Actin

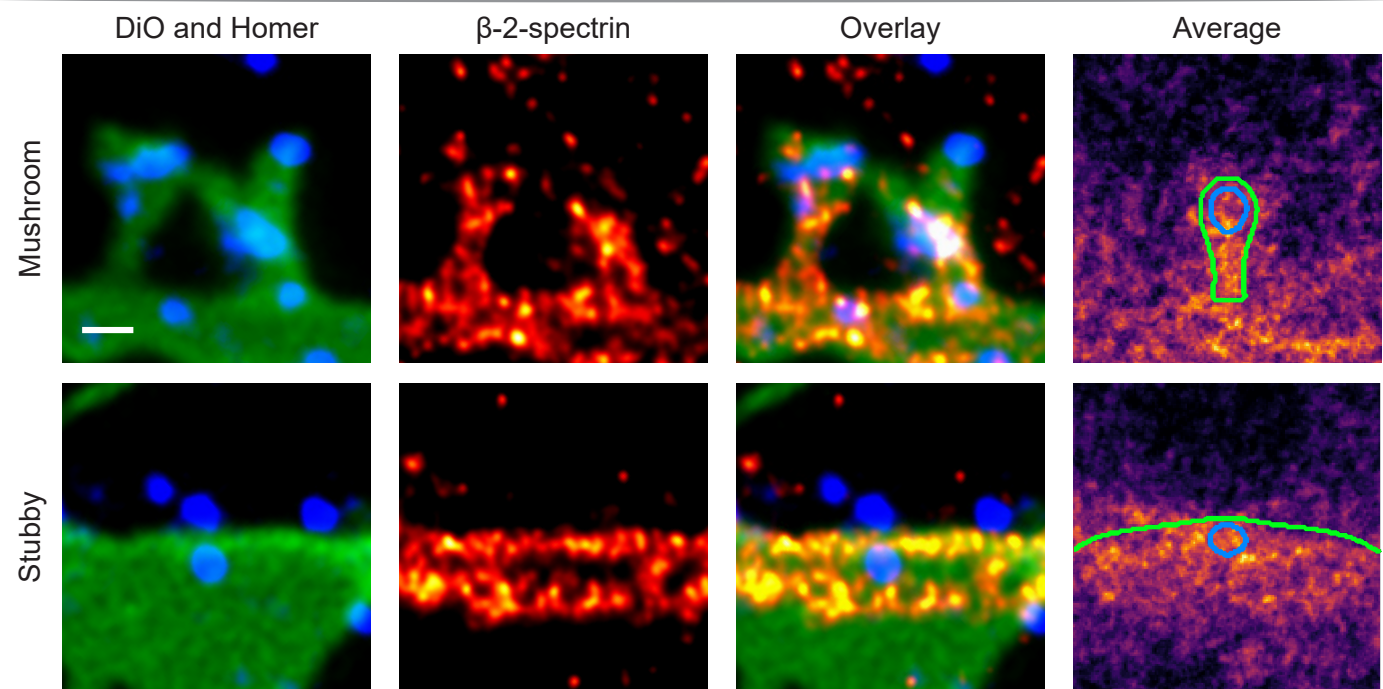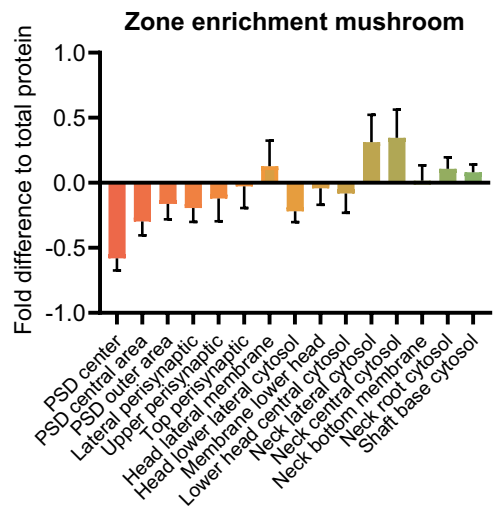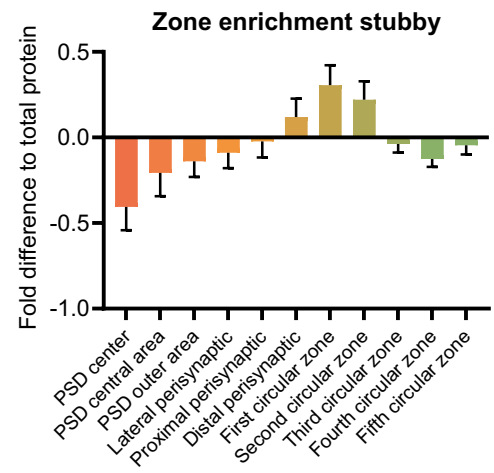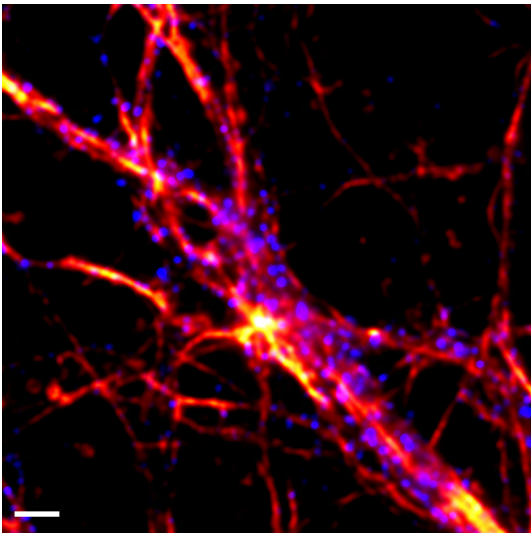

|                        |                                              |                     |
|------------------------|----------------------------------------------|---------------------|
| Whole cell copy number | 198535936.9 $\pm$ 293727058.6 (extrapolated) |                     |
| Spine copy number      | 5591.1 $\pm$ 3922.8                          |                     |
| Function               | Cytoskeleton                                 |                     |
|                        | Mushroom                                     | Stubby              |
| Spine copy number      | 4937.4 $\pm$ 3464.2                          | 6899.0 $\pm$ 4840.5 |
| % of total protein     | 6.5 $\pm$ 4.6%                               | 7.8 $\pm$ 5.5%      |
| Molarity ( $\mu$ M)    | 62.7 $\pm$ 44.0                              | 65.2 $\pm$ 0.2      |
| PSD copy number        | 354 $\pm$ 248.4                              | 751 $\pm$ 526.9     |
| % in PSD               | 7.2 $\pm$ 5.0%                               | 10.9 $\pm$ 7.6%     |

|          | Spine copy number   | % of total protein | Molarity ( $\mu\text{M}$ ) | PSD copy number |
|----------|---------------------|--------------------|----------------------------|-----------------|
| Mushroom | $4937.4 \pm 3464.2$ | $6.5 \pm 4.6\%$    | $62.7 \pm 44.0$            | $354 \pm 248.4$ |
| Stubby   | $6899.0 \pm 4840.5$ | $7.8 \pm 5.5\%$    | $65.2 \pm 0.2$             | $751 \pm 526.9$ |

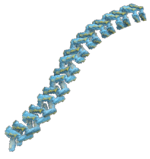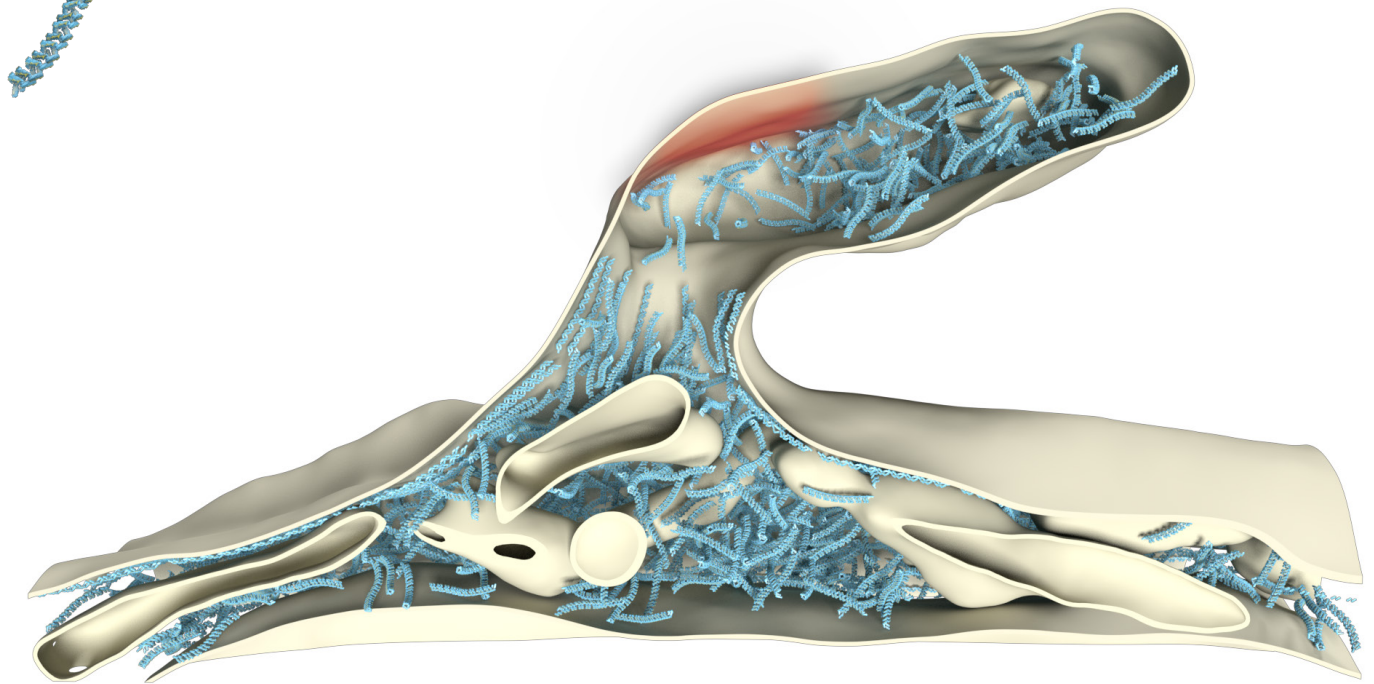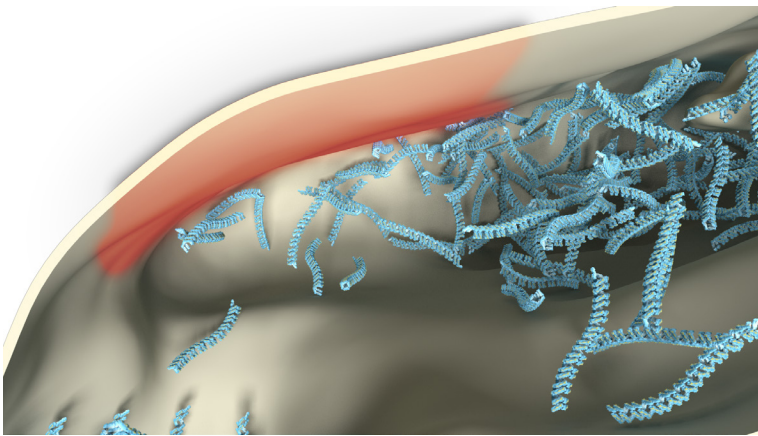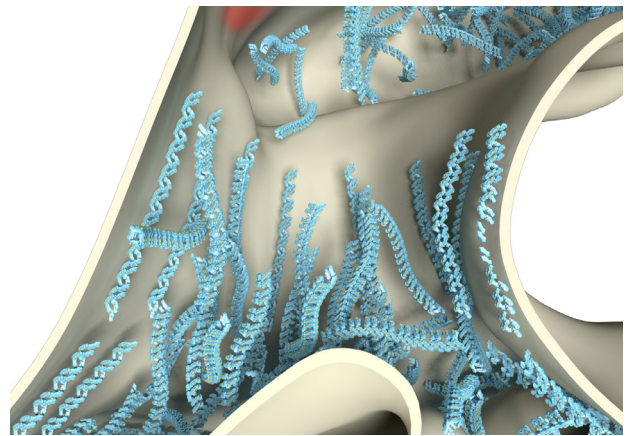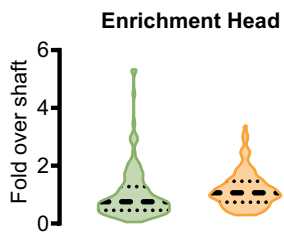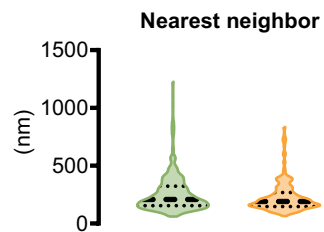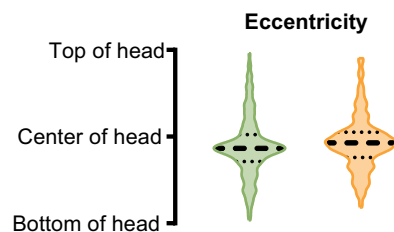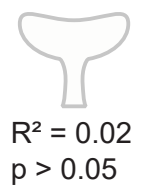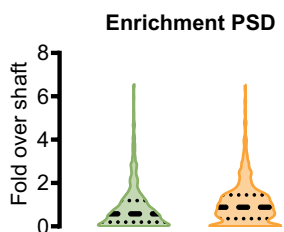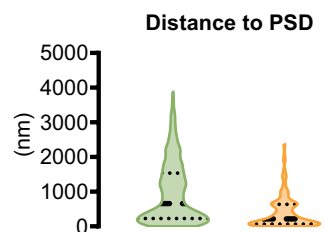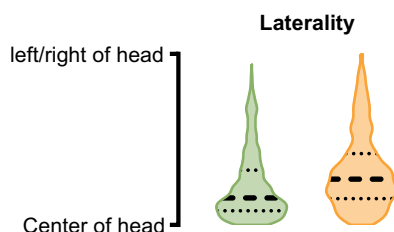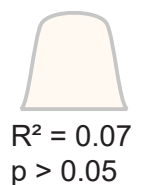



|          | Spine copy number   | % of total protein | Molarity ( $\mu\text{M}$ ) | PSD copy number |
|----------|---------------------|--------------------|----------------------------|-----------------|
| Mushroom | $4937.4 \pm 3464.2$ | $6.5 \pm 4.6\%$    | $62.7 \pm 44.0$            | $354 \pm 248.4$ |
| Stubby   | $6899.0 \pm 4840.5$ | $7.8 \pm 5.5\%$    | $65.2 \pm 0.2$             | $751 \pm 526.9$ |

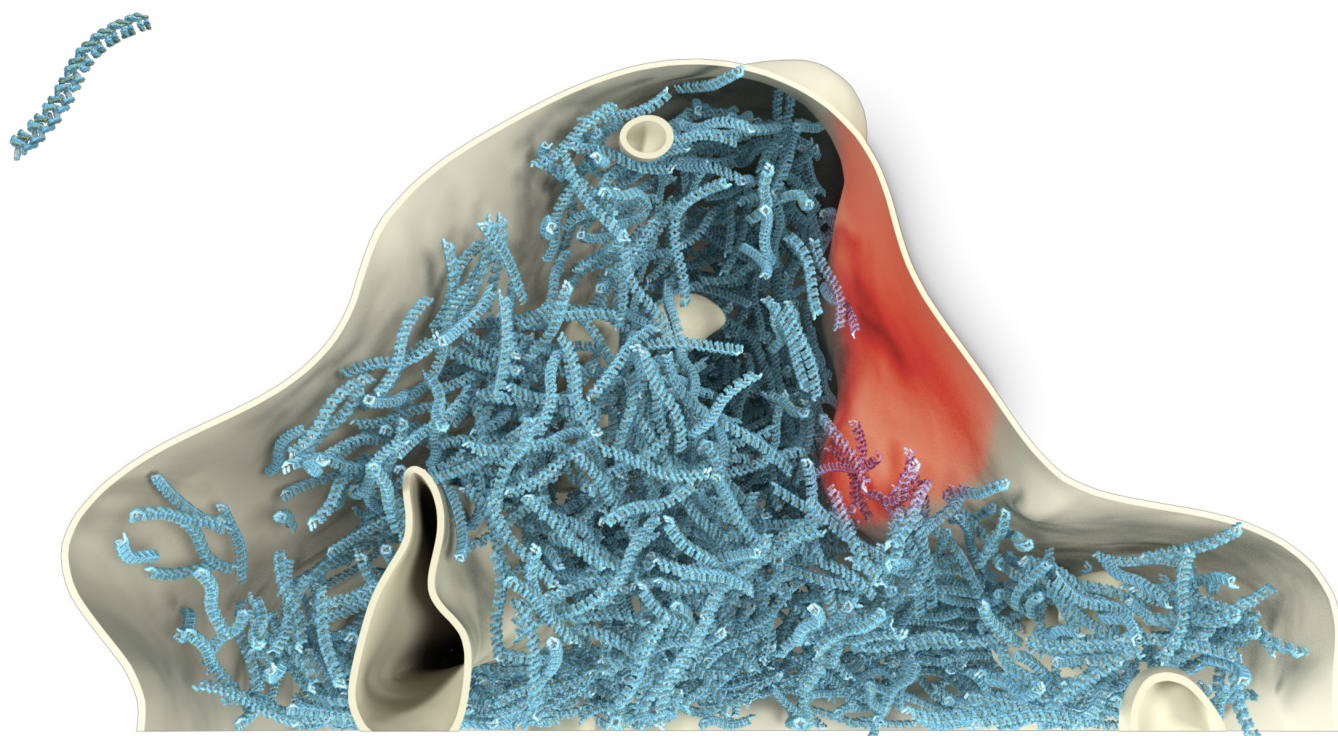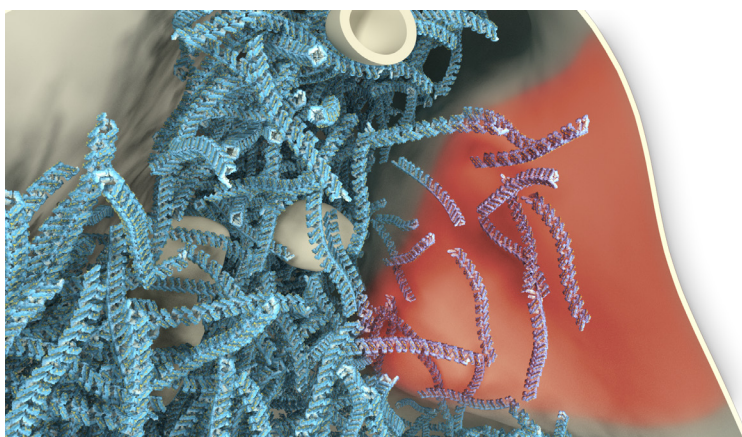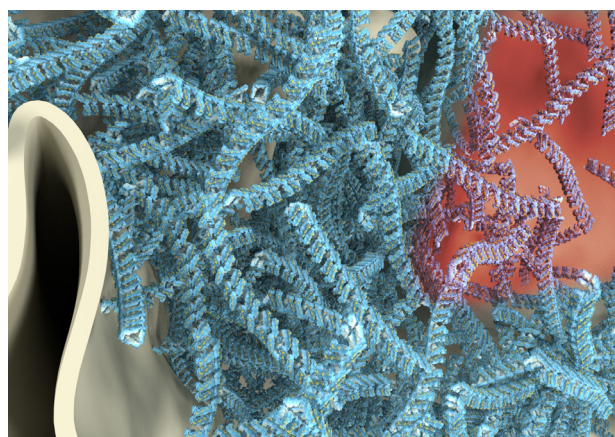

## References

**Antibody:** BD Biosciences 612562

**PDB Identifier:** 1s35

### Literature:

Xu et al., 2013, Science

Bär et al., 2016, Sci. Rep.

Sidenstein et al., 2016, Sci. Rep.

Brown et al., 2015, PLoS Comput Biol.

## $\beta$ -3-tubulin (Gene: Tubb3, Uniprot ID: Q4QRB4)

**Known function:** Forms microtubules

**Known organization:** Cytosolic, Forms hollow microtubule, Neuron specific

**Known Interactions:**  $\alpha$ -tubulins,  $\alpha$ -internexin

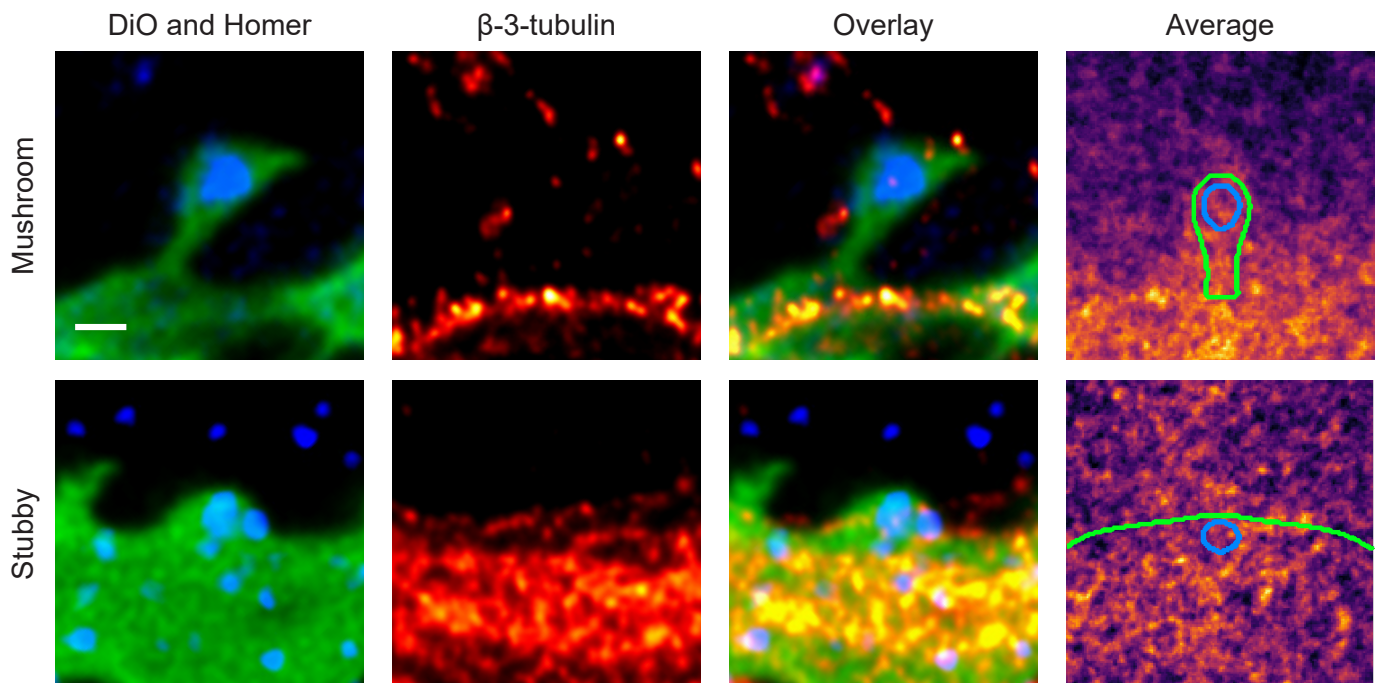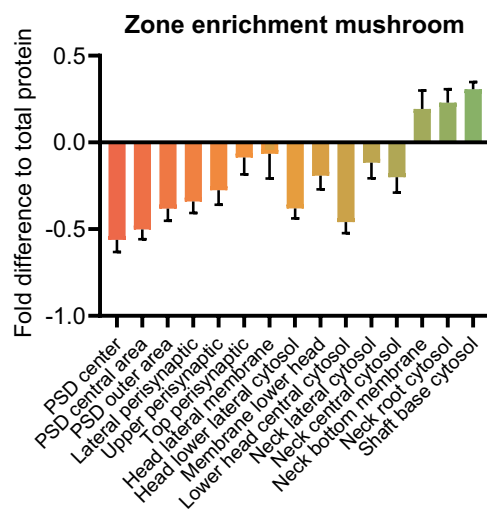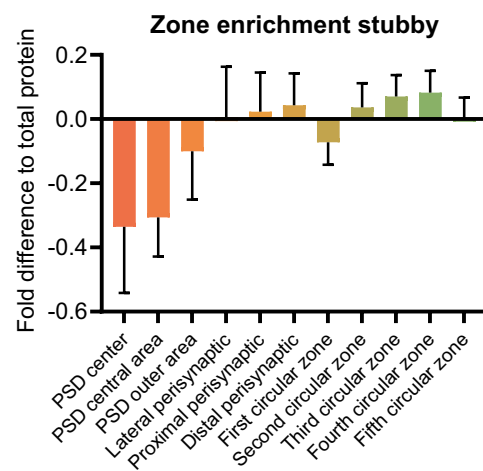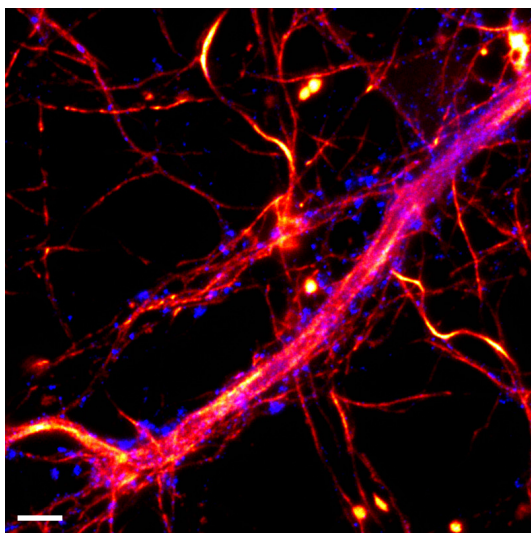

|                        |                               |             |
|------------------------|-------------------------------|-------------|
| Whole cell copy number | 57157820.0<br>$\pm$ 3311132.0 |             |
| Spine copy number      | not present                   |             |
| Function               | Cytoskeleton                  |             |
|                        | Mushroom                      | Stubby      |
| Spine copy number      | not present                   | not present |
| % of total protein     | not present                   | not present |
| Molarity ( $\mu$ M)    | not present                   | not present |
| PSD copy number        | not present                   | not present |
| % in PSD               | not present                   | not present |



|          | Spine copy number | % of total protein | Molarity ( $\mu\text{M}$ ) | PSD copy number |
|----------|-------------------|--------------------|----------------------------|-----------------|
| Mushroom | not present       | not present        | not present                | not present     |
| Stubby   | not present       | not present        | not present                | not present     |

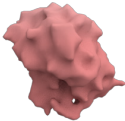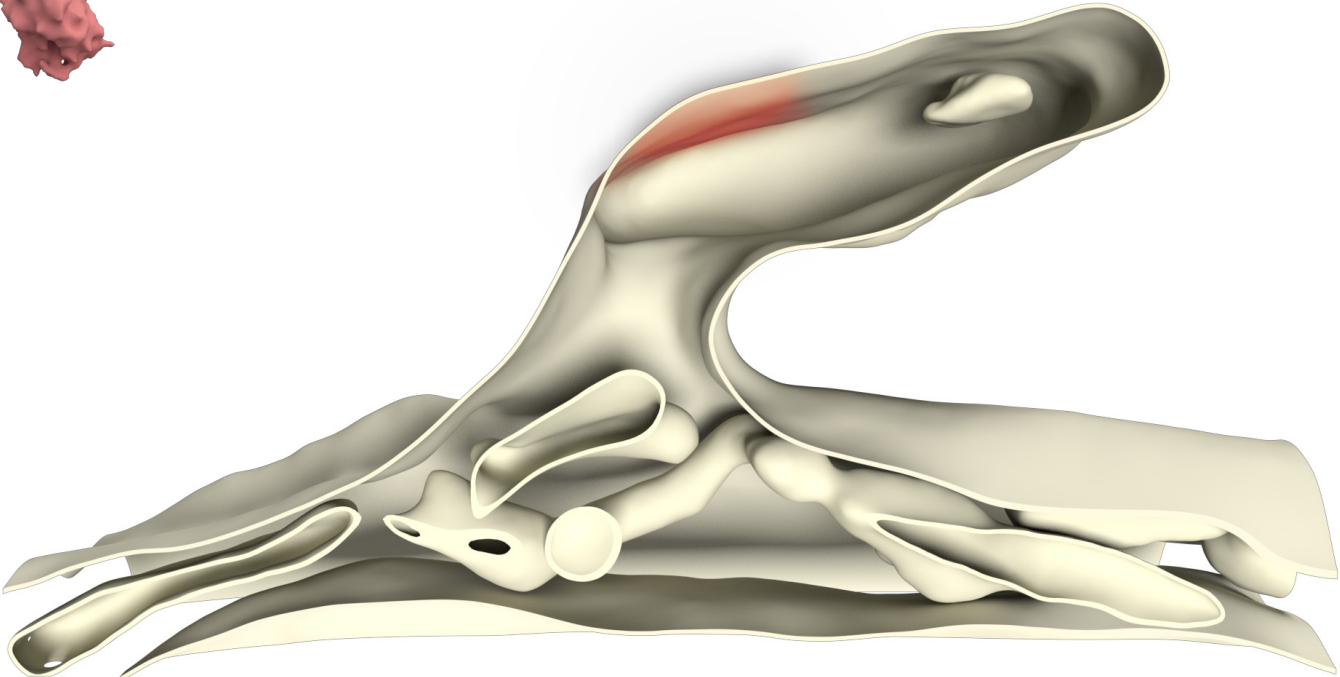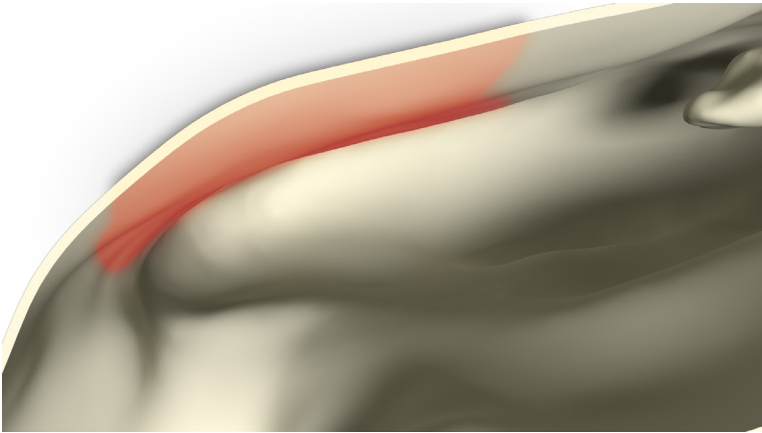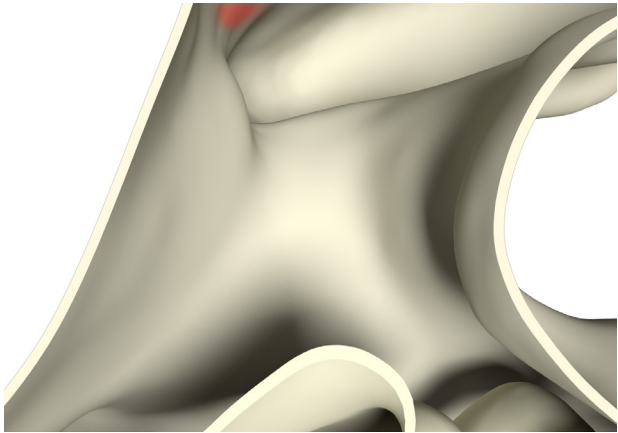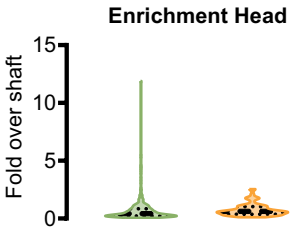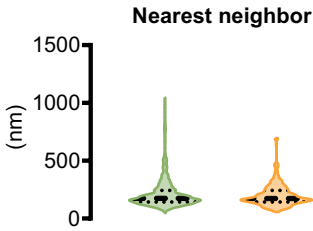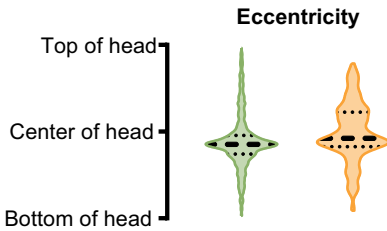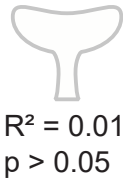

$R^2 = 0.01$   
 $p > 0.05$

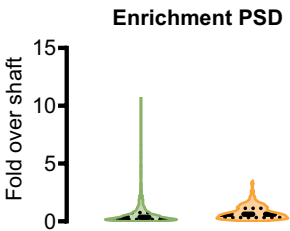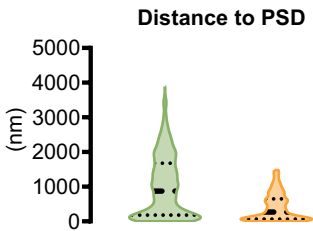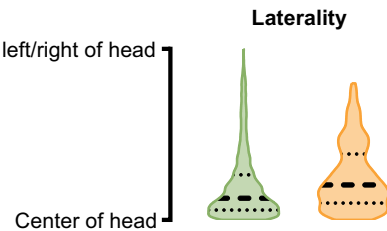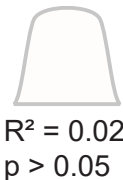

$R^2 = 0.02$   
 $p > 0.05$

|          | Spine copy number | % of total protein | Molarity ( $\mu\text{M}$ ) | PSD copy number |
|----------|-------------------|--------------------|----------------------------|-----------------|
| Mushroom | not present       | not present        | not present                | not present     |
| Stubby   | not present       | not present        | not present                | not present     |

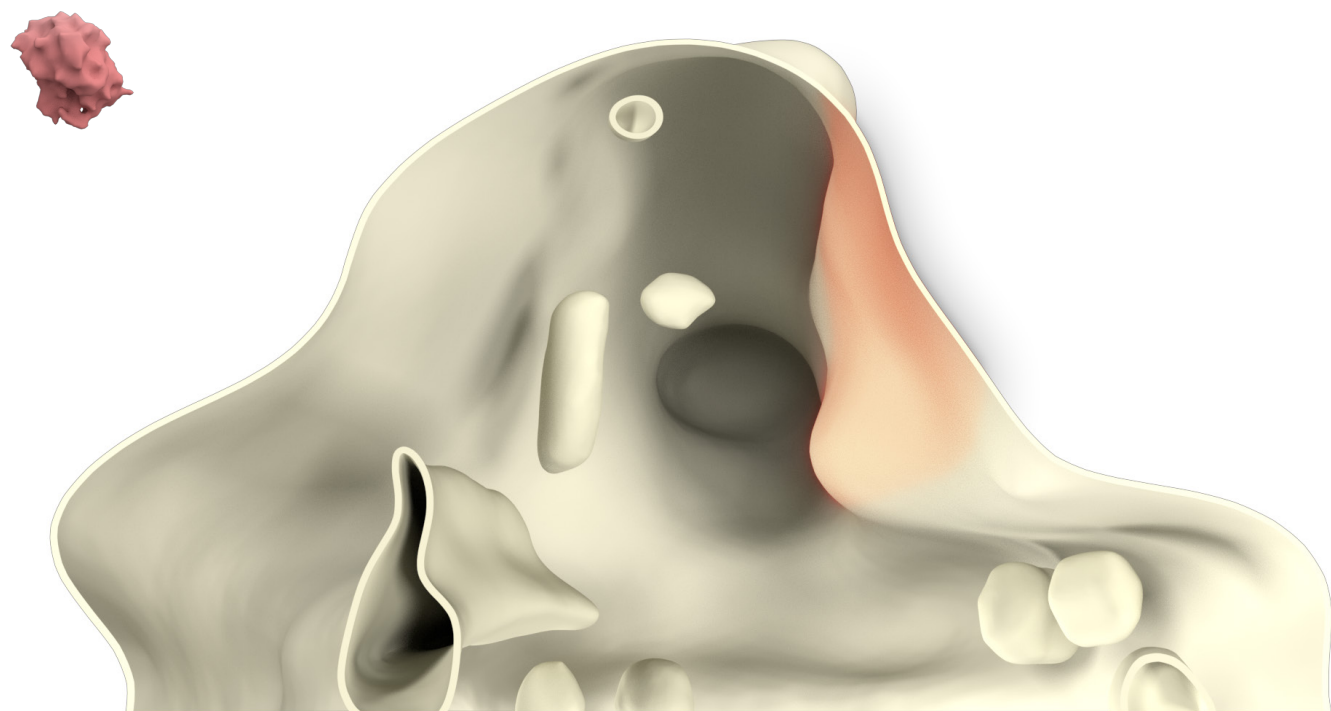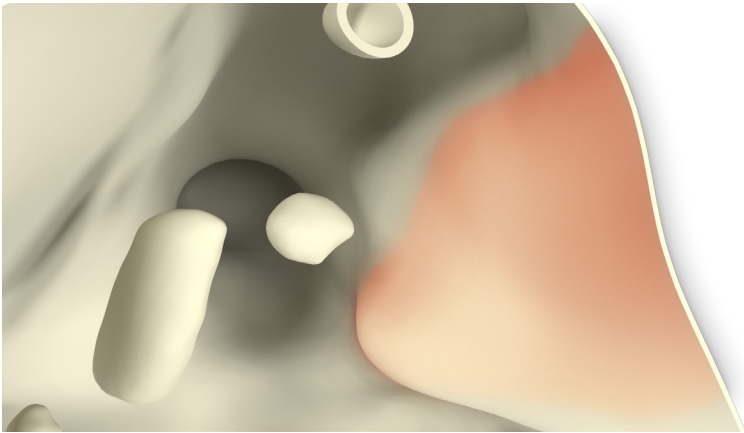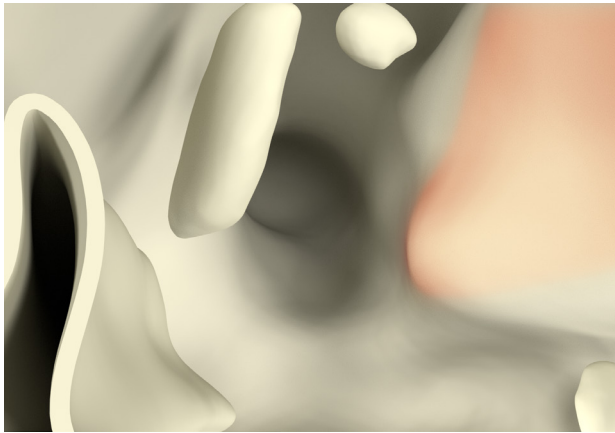

### References

**Antibody:** Cell Signaling 5568

**PDB Identifier:** 6e7b

**Literature:**

Sullivan and Cleveland, 1986, PNAS

Jaworski et al., 2009, Neuron

Kaech et al., 2001, PNAS

Landis and Reese, 1983, J. Cell. Biol.



pan-β-tubulin (Genes: Tubb1, Tubb2a, Tubb2b, Tubb3, Tubb4a, Tubb4b, Tubb5, Tubb6, Uniprot IDs: M0R8B6, P85108, Q3KRE8, Q4QRB4, B4F7C2, Q6P9T8, P69897, Q4QQV0)

Known function: Forms microtubules. Known organization: Cytosolic, Forms hollow microtubule

Known Interactions: α-tubulins, α-internexin

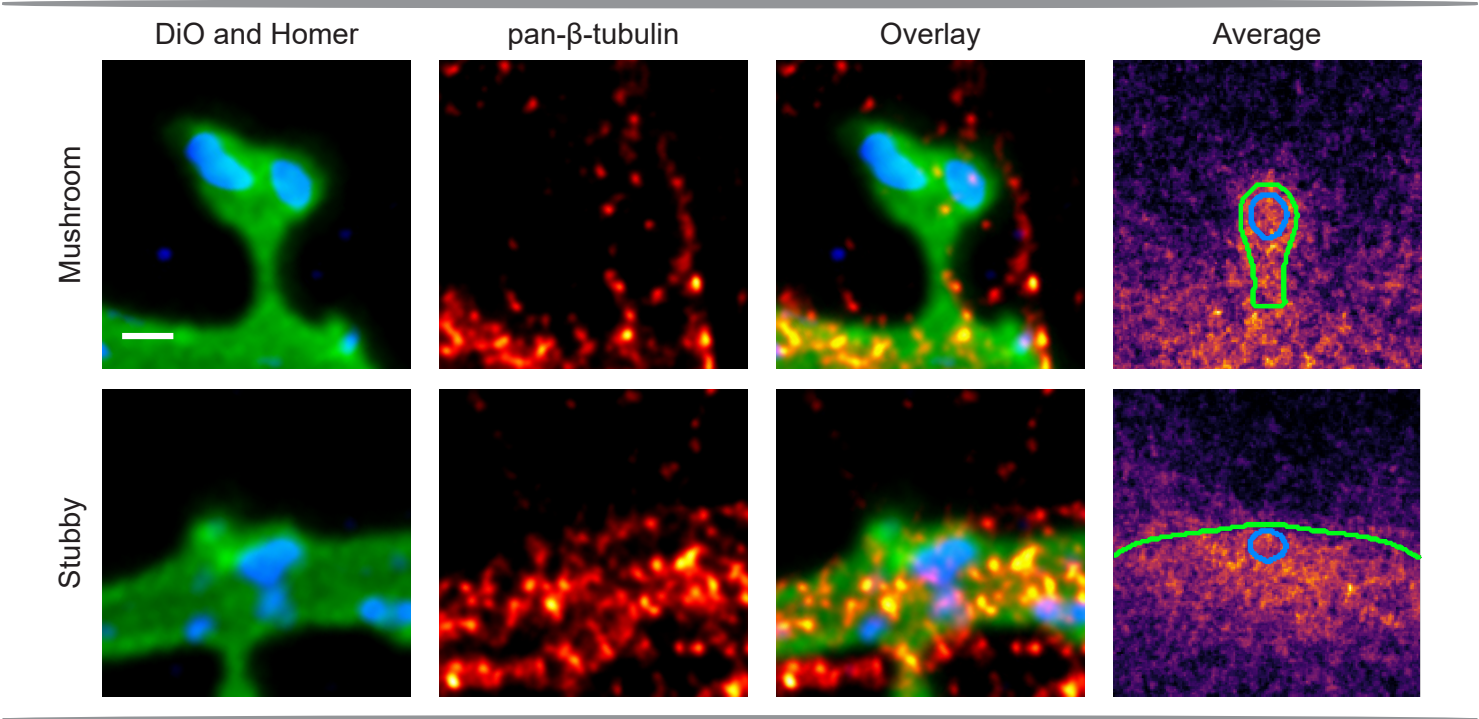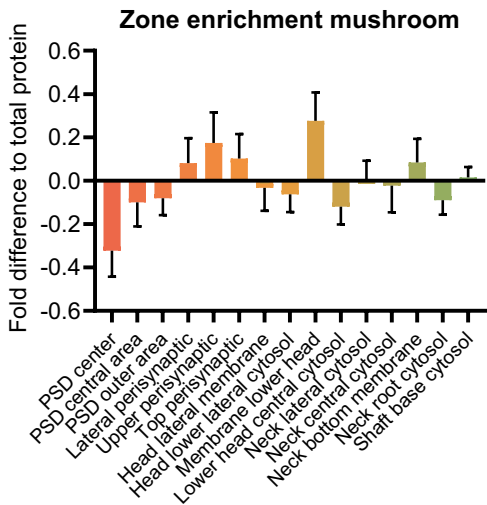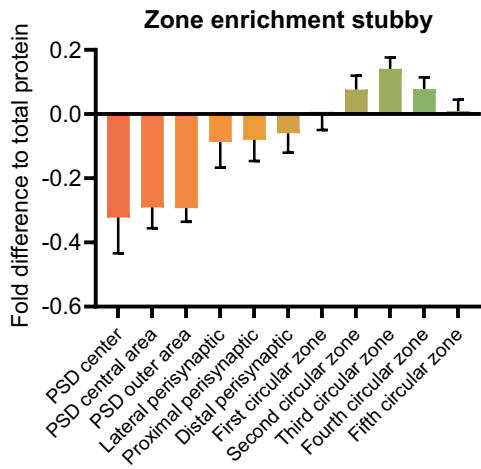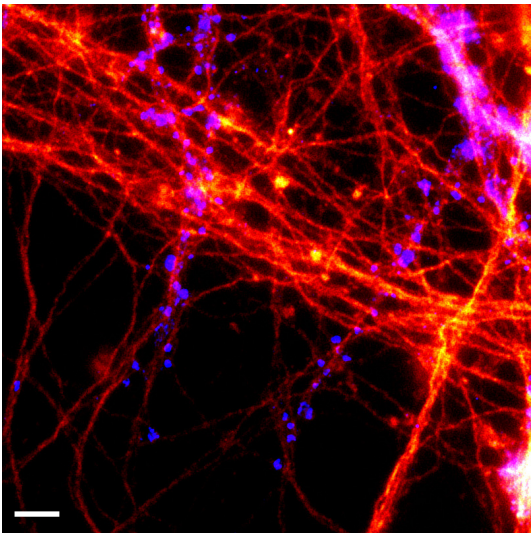

|                        |                         |                   |
|------------------------|-------------------------|-------------------|
| Whole cell copy number | 669979114.3 ± 8363767.6 |                   |
| Spine copy number      | 54900.4 ± 22979.8       |                   |
| Function               | Cytoskeleton            |                   |
|                        | Mushroom                | Stubby            |
| Spine copy number      | 42095.1 ± 17619.8       | 75104.1 ± 31436.5 |
| % of total protein     | 10.5 ± 4.4%             | 16.2 ± 6.8%       |
| Molarity (μM)          | 534.6 ± 223.8           | 709.8 ± 297.1     |
| PSD copy number        | 4317 ± 1807.0           | 6460 ± 2704.0     |
| % in PSD               | 10.3 ± 4.3%             | 8.6 ± 3.6%        |

|          | Spine copy number     | % of total protein | Molarity ( $\mu\text{M}$ ) | PSD copy number   |
|----------|-----------------------|--------------------|----------------------------|-------------------|
| Mushroom | $42095.1 \pm 17619.8$ | $10.5 \pm 4.4\%$   | $534.6 \pm 223.8$          | $4317 \pm 1807.0$ |
| Stubby   | $75104.1 \pm 31436.5$ | $16.2 \pm 6.8\%$   | $709.8 \pm 297.1$          | $6460 \pm 2704.0$ |

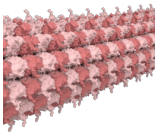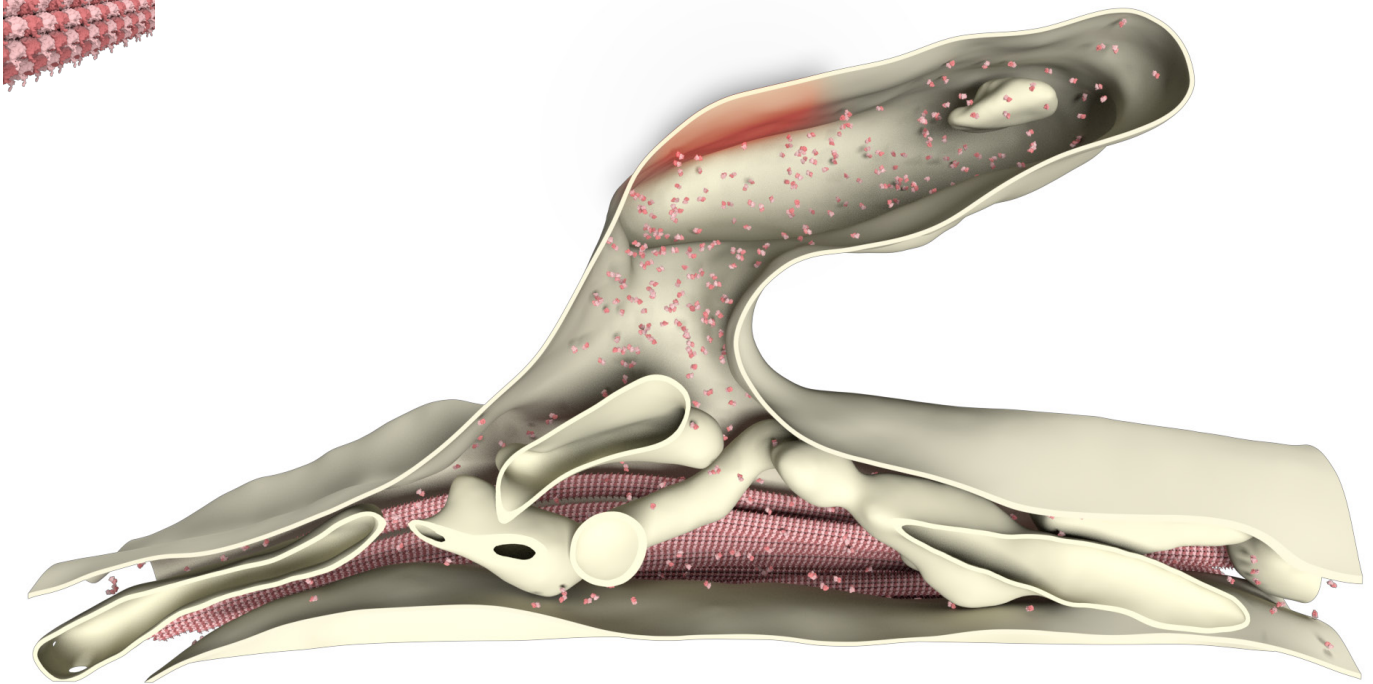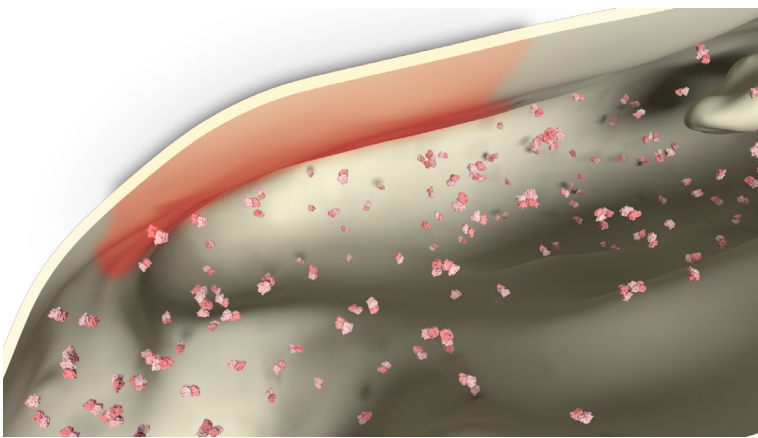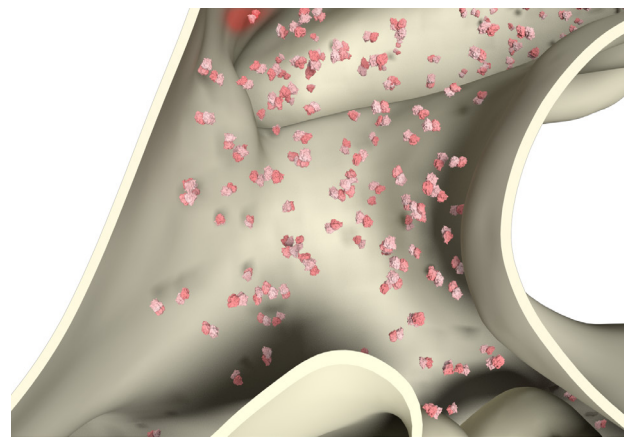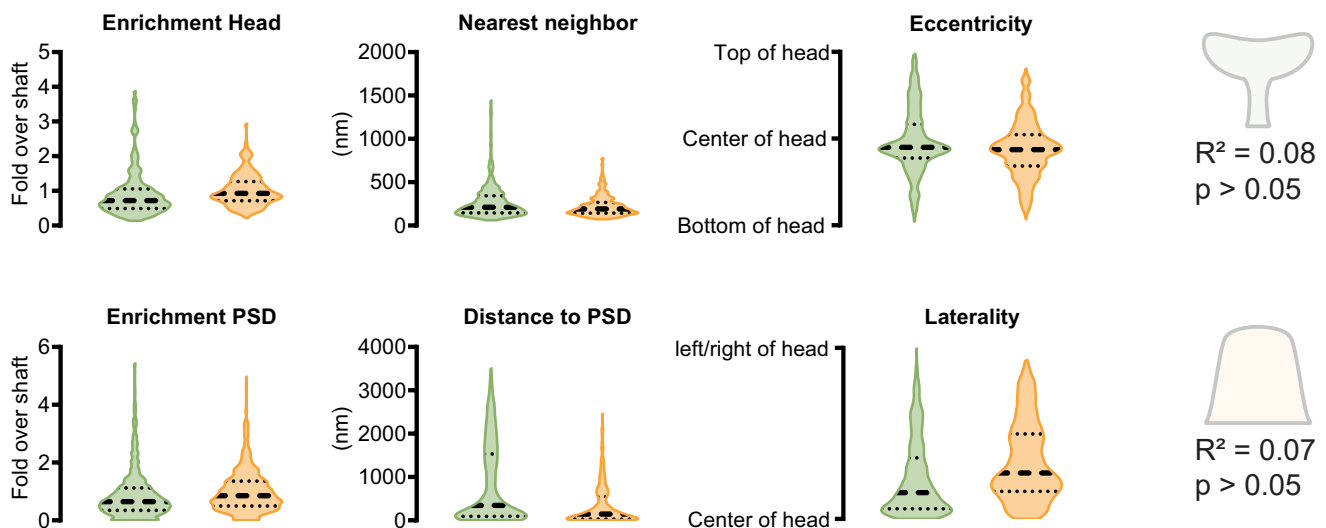



|          | Spine copy number     | % of total protein | Molarity ( $\mu\text{M}$ ) | PSD copy number   |
|----------|-----------------------|--------------------|----------------------------|-------------------|
| Mushroom | $42095.1 \pm 17619.8$ | $10.5 \pm 4.4\%$   | $534.6 \pm 223.8$          | $4317 \pm 1807.0$ |
| Stubby   | $75104.1 \pm 31436.5$ | $16.2 \pm 6.8\%$   | $709.8 \pm 297.1$          | $6460 \pm 2704.0$ |

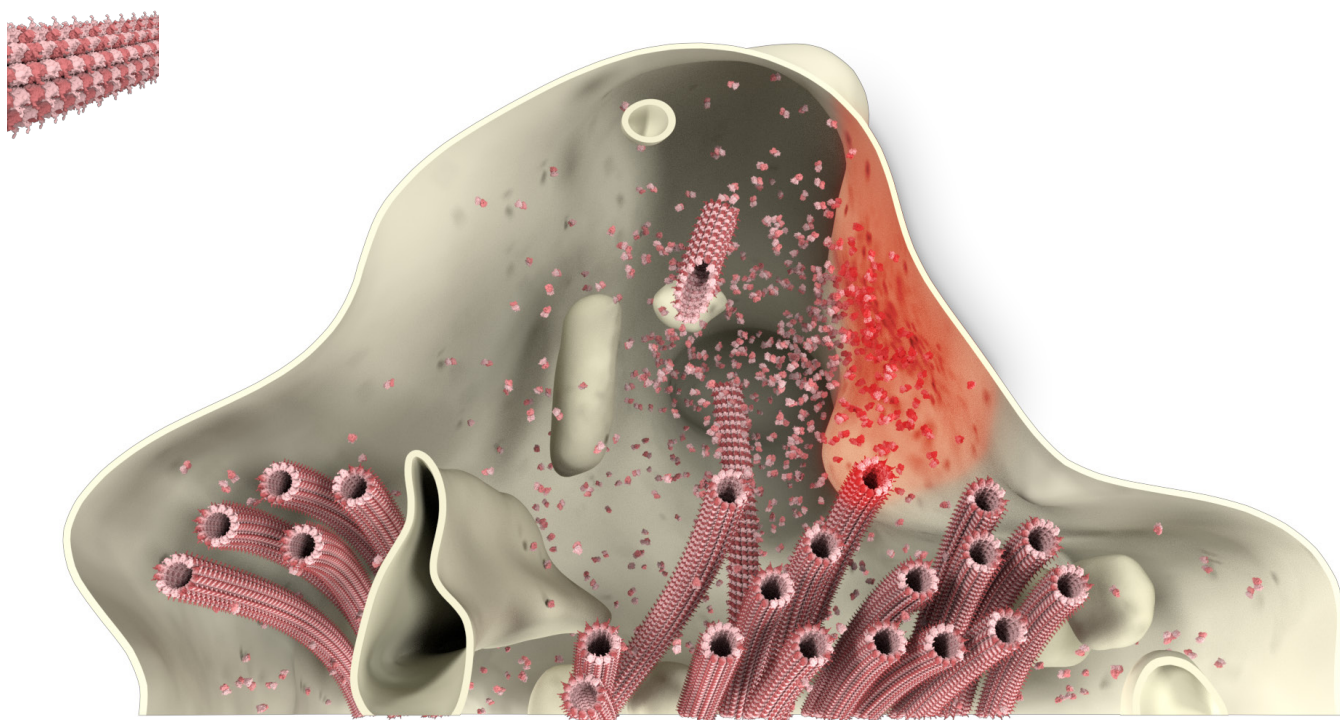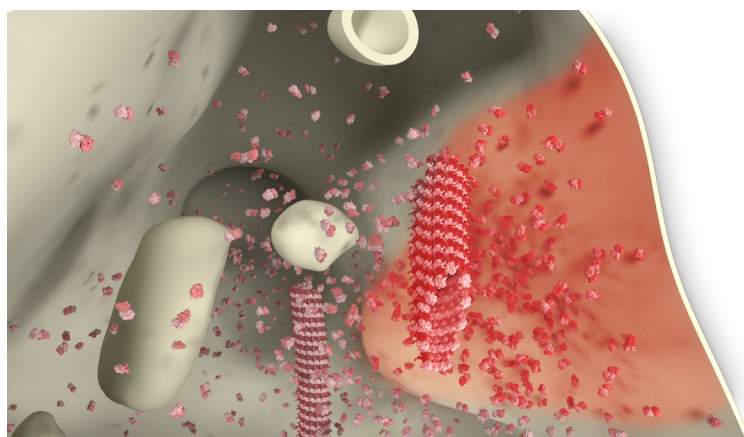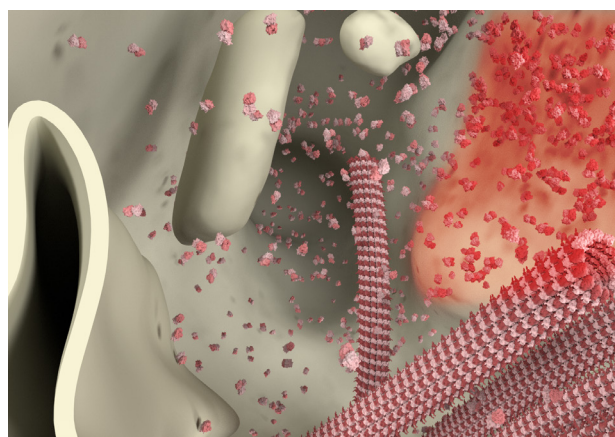

## References

**Antibody:** Self-made nanobody (Mikhalyova et al. 2015) **PDB Identifier:** 1tub

### Literature:

Jaworski et al., 2009, Neuron

Kaech et al., 2001, PNAS

Landis and Reese, 1983, J. Cell. Biol.



Calbindin-D28K (Gene: Calb1, Uniprot ID: P07171)

Known function: Calcium buffer, Only found in a subset of hippocampal neurons

Known organization: Cytosolic

Known Interactions: None

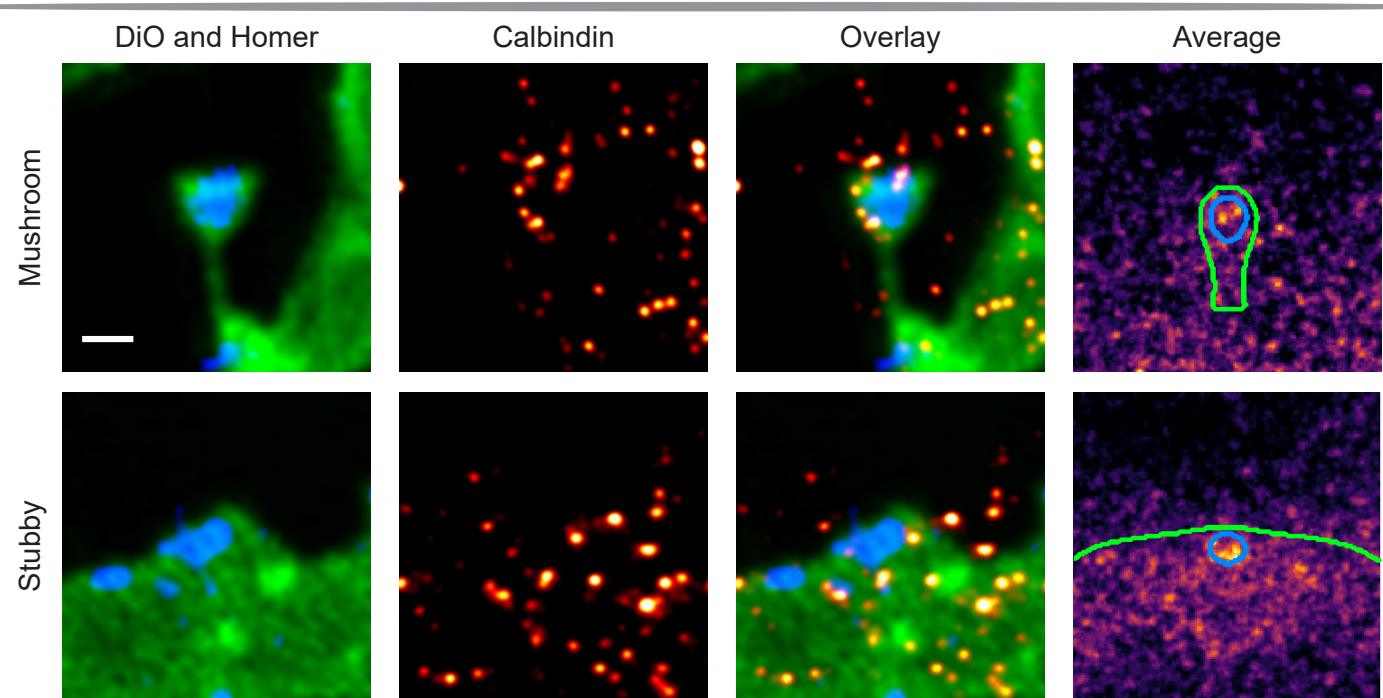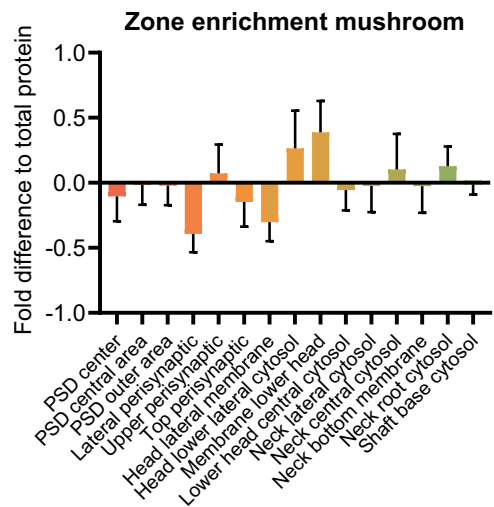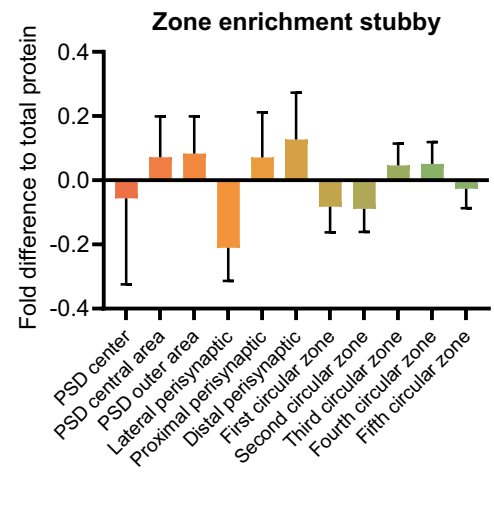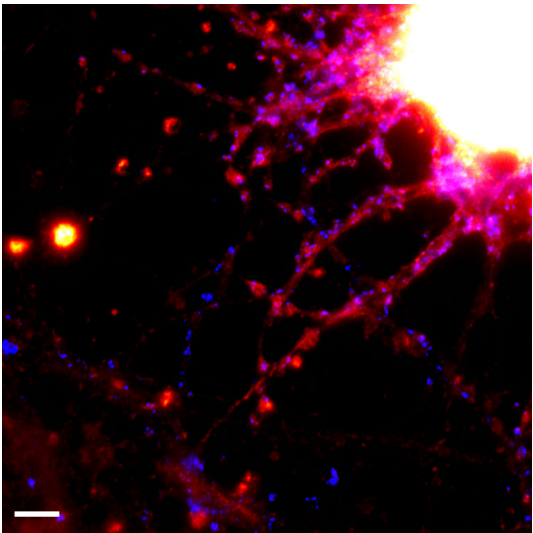

|                        |                      |               |
|------------------------|----------------------|---------------|
| Whole cell copy number | 5458926.1 ± 584718.7 |               |
| Spine copy number      | 785.1 ± 190.9        |               |
| Function               | Signaling            |               |
|                        | Mushroom             | Stubby        |
| Spine copy number      | 685.3 ± 166.6        | 959.0 ± 233.2 |
| % of total protein     | 0.1 ± 0.0%           | 0.1 ± 0.0%    |
| Molarity (μM)          | 8.7 ± 2.1            | 9.1 ± 2.2     |
| PSD copy number        | 138 ± 33.6           | 246 ± 59.8    |
| % in PSD               | 20.1 ± 4.9%          | 25.7 ± 6.2%   |

|          | Spine copy number | % of total protein | Molarity ( $\mu\text{M}$ ) | PSD copy number |
|----------|-------------------|--------------------|----------------------------|-----------------|
| Mushroom | $685.3 \pm 166.6$ | $0.1 \pm 0.0\%$    | $8.7 \pm 2.1$              | $138 \pm 33.6$  |
| Stubby   | $959.0 \pm 233.2$ | $0.1 \pm 0.0\%$    | $9.1 \pm 2.2$              | $246 \pm 59.8$  |

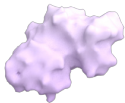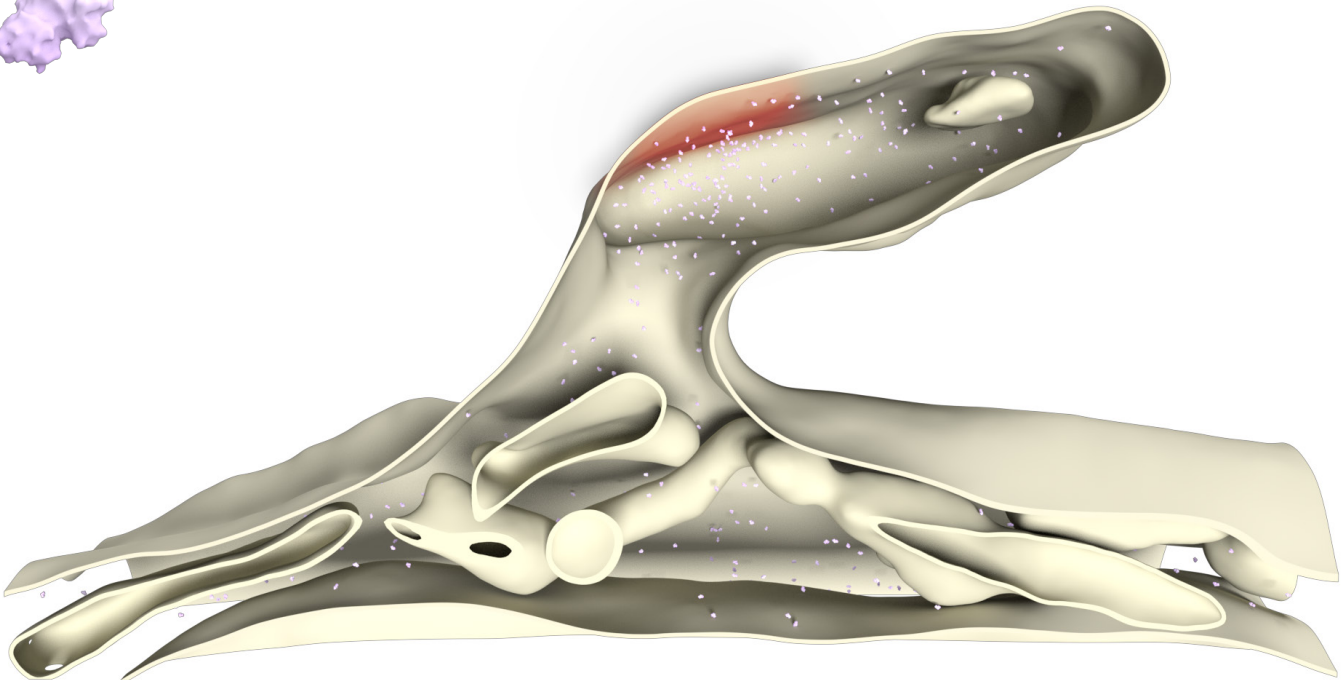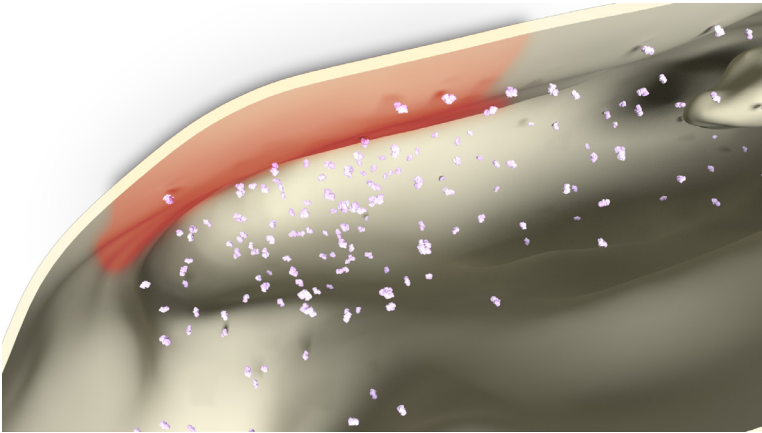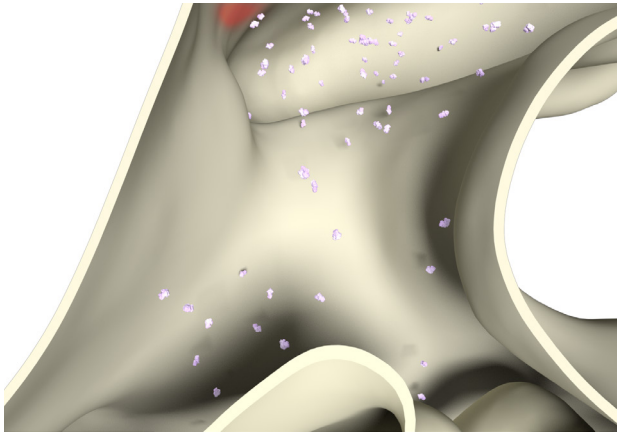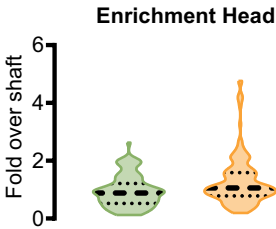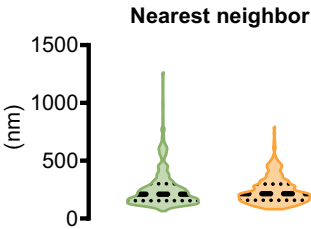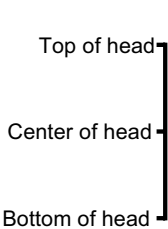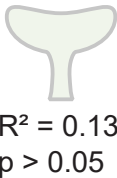

$R^2 = 0.13$   
 $p > 0.05$

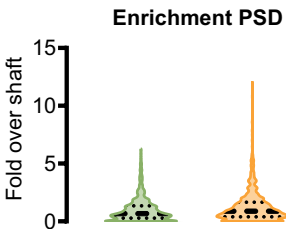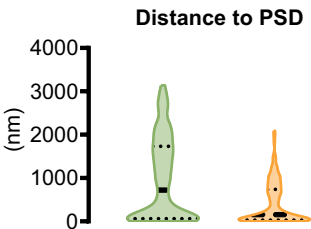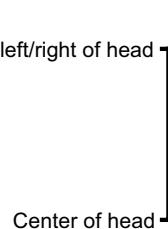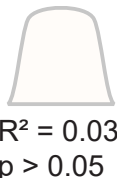

$R^2 = 0.03$   
 $p > 0.05$

|          | Spine copy number | % of total protein | Molarity ( $\mu\text{M}$ ) | PSD copy number |
|----------|-------------------|--------------------|----------------------------|-----------------|
| Mushroom | $685.3 \pm 166.6$ | $0.1 \pm 0.0\%$    | $8.7 \pm 2.1$              | $138 \pm 33.6$  |
| Stubby   | $959.0 \pm 233.2$ | $0.1 \pm 0.0\%$    | $9.1 \pm 2.2$              | $246 \pm 59.8$  |

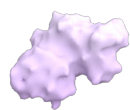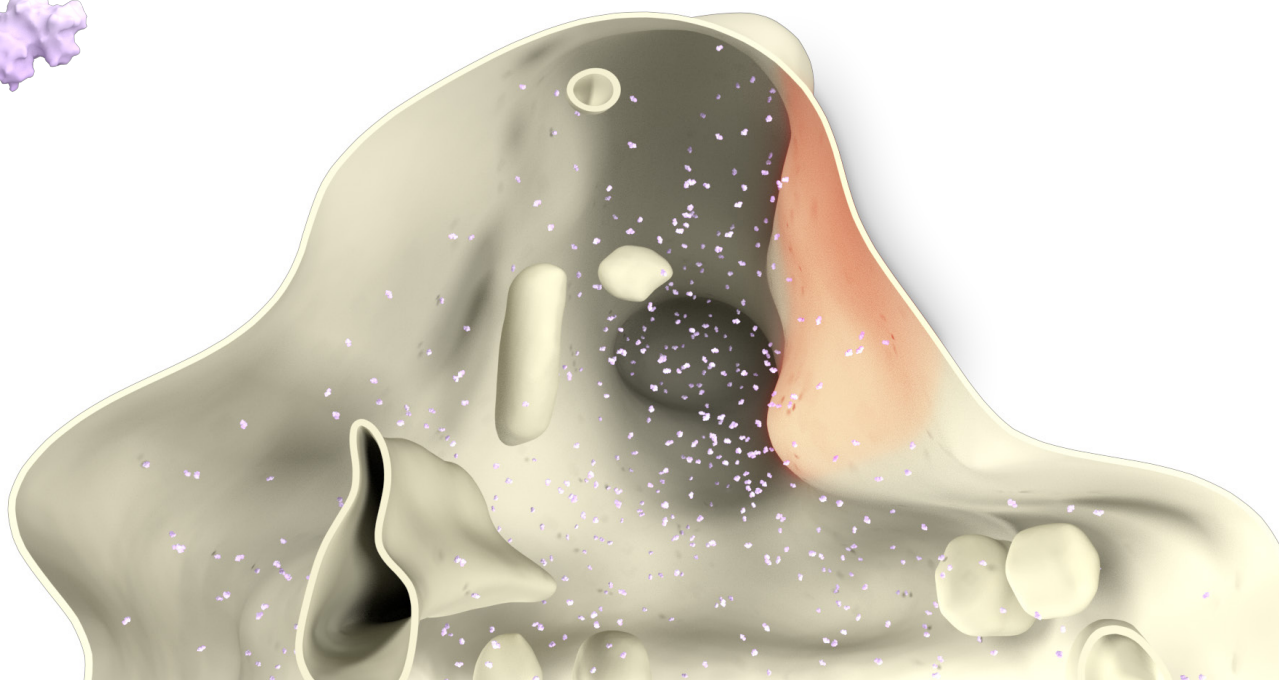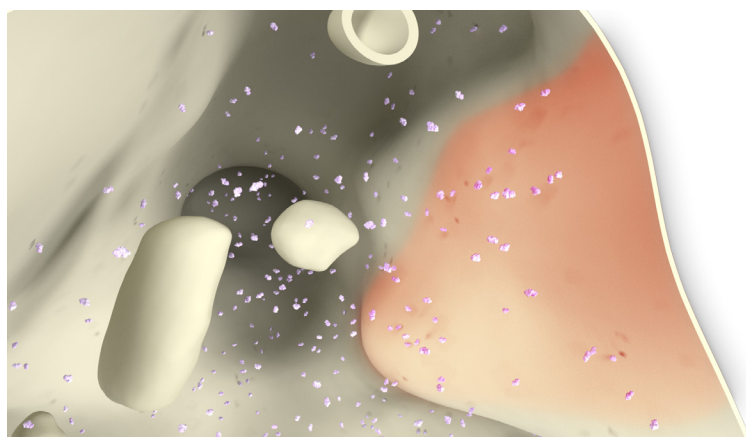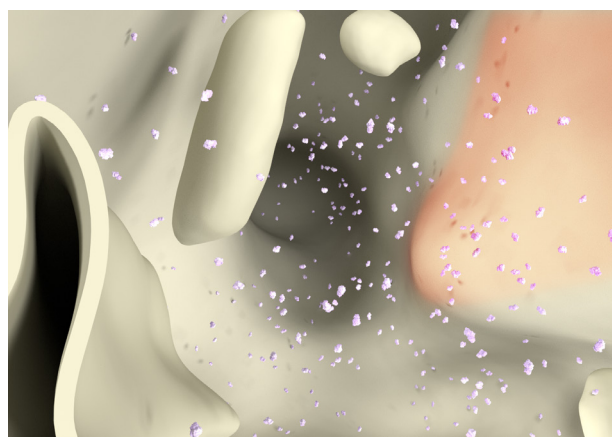

## References

**Antibody:** Synaptic Systems 214 002

**PDB Identifier:** 2g9b

### Literature:

Berggard et al., 2002, J. Biol. Chem.

Veenstra et al., 1997, Biochemistry

Villa et al., 1994, Eur. J. Neurosci.



**Calcineurin (Protein Phosphatase 2B, Gene: Ppp3ca, Uniprot ID: P63329)**

**Known function:** Serine/Threonin Phosphatase, important for LTD

**Known organization:** Close to PSD, Anchored to PSD95 and PSD93

**Known Interactions:** actin, AMPA receptors, calcium channels, Dynamin1, NMDA receptors, nNOS, tubulins

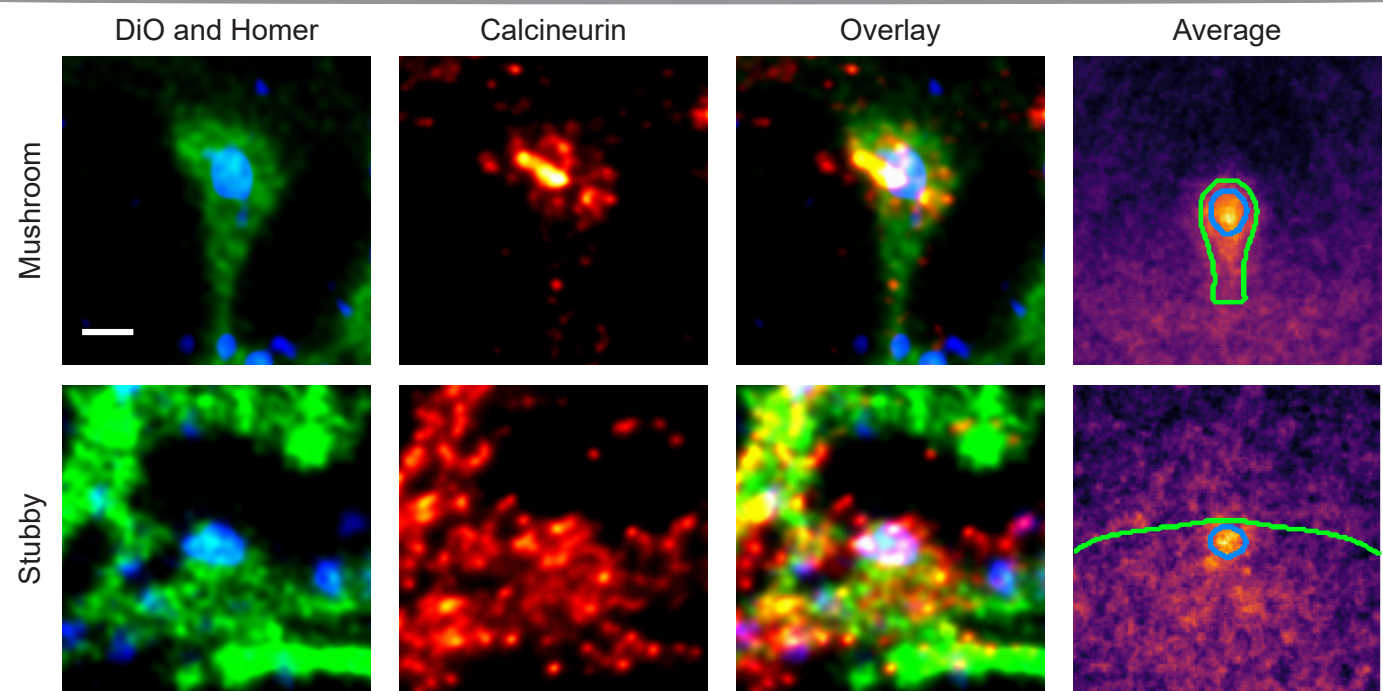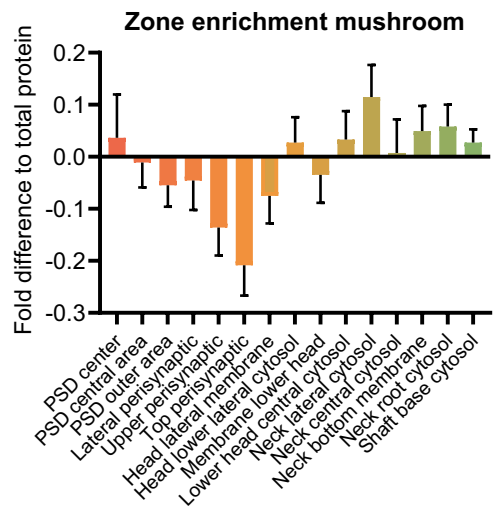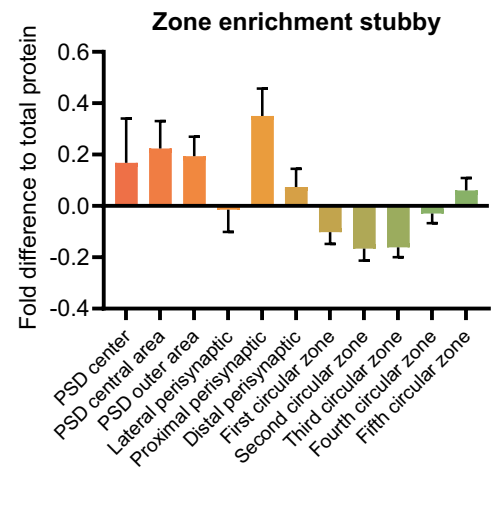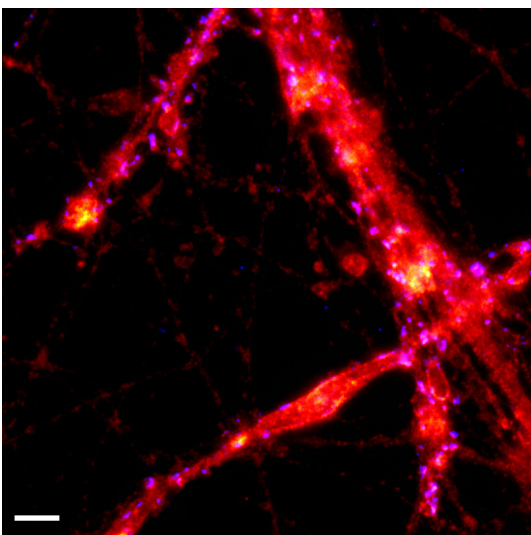

|                        |                      |                |
|------------------------|----------------------|----------------|
| Whole cell copy number | 9397256.7 ± 917478.0 |                |
| Spine copy number      | 5086.7 ± 660.3       |                |
| Function               | Signaling            |                |
|                        | Mushroom             | Stubby         |
| Spine copy number      | 5205.0 ± 675.6       | 5090.3 ± 660.7 |
| % of total protein     | 1.5 ± 0.2%           | 1.2 ± 0.2%     |
| Molarity (µM)          | 66.1 ± 8.6           | 48.1 ± 6.2     |
| PSD copy number        | 1920 ± 249.2         | 1797 ± 233.3   |
| % in PSD               | 36.9 ± 4.8%          | 35.3 ± 4.6%    |

|          | Spine copy number  | % of total protein | Molarity ( $\mu\text{M}$ ) | PSD copy number  |
|----------|--------------------|--------------------|----------------------------|------------------|
| Mushroom | $5205.0 \pm 675.6$ | $1.5 \pm 0.2\%$    | $66.1 \pm 8.6$             | $1920 \pm 249.2$ |
| Stubby   | $5090.3 \pm 660.7$ | $1.2 \pm 0.2\%$    | $48.1 \pm 6.2$             | $1797 \pm 233.3$ |

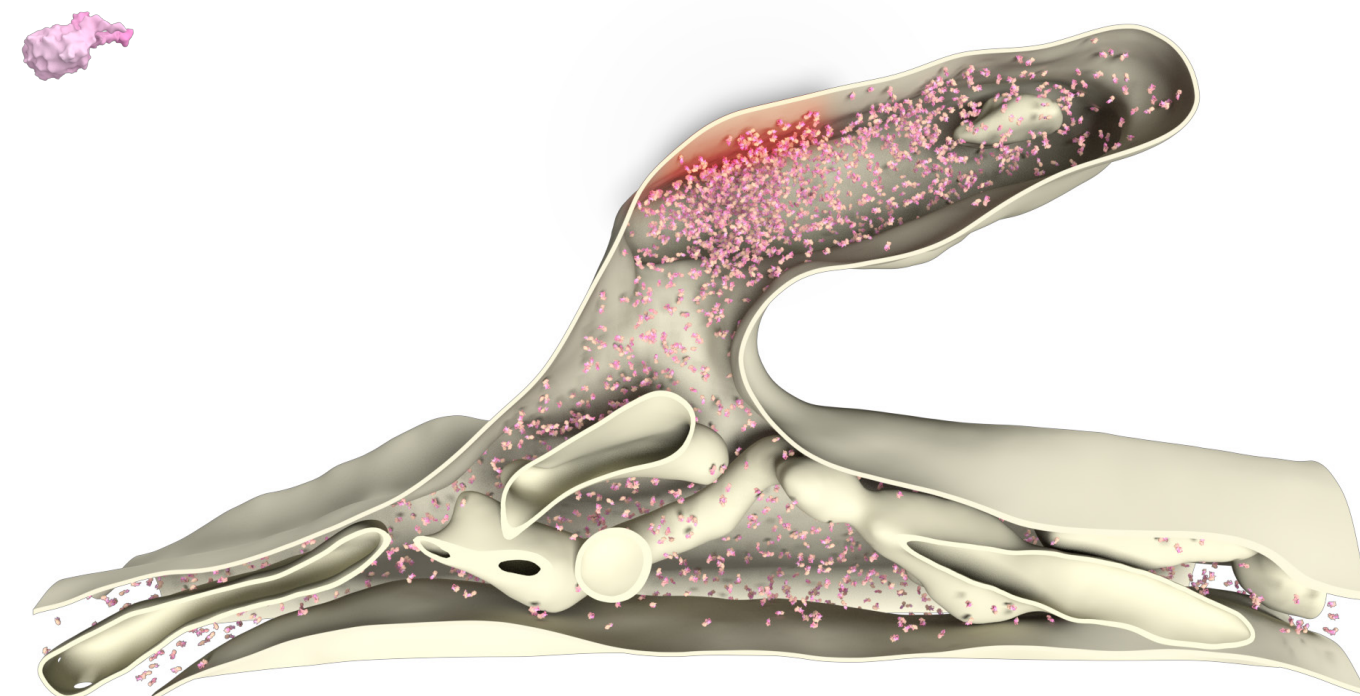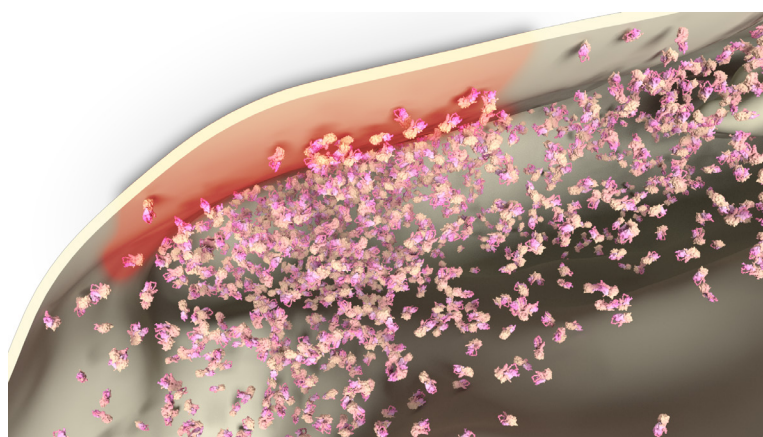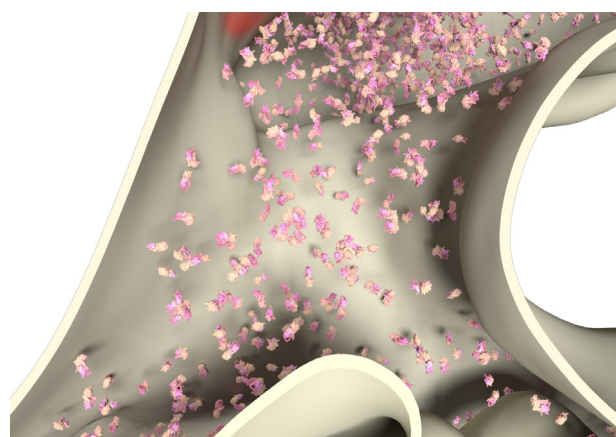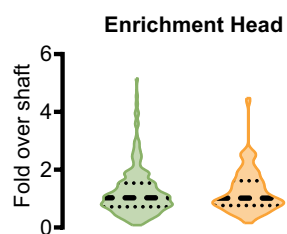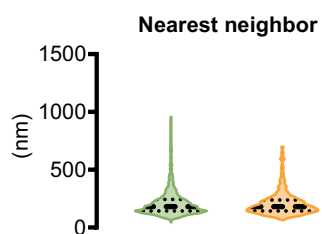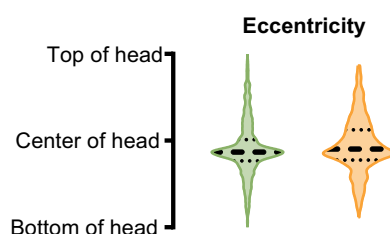

$R^2 = 0.22$   
 $p < 0.05$

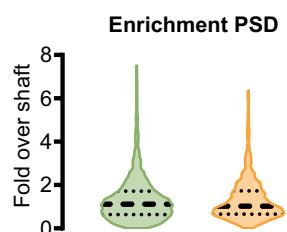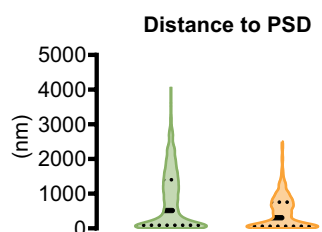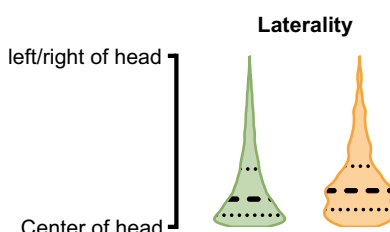

$R^2 = 0.26$   
 $p < 0.05$



|          | Spine copy number  | % of total protein | Molarity ( $\mu\text{M}$ ) | PSD copy number  |
|----------|--------------------|--------------------|----------------------------|------------------|
| Mushroom | $5205.0 \pm 675.6$ | $1.5 \pm 0.2\%$    | $66.1 \pm 8.6$             | $1920 \pm 249.2$ |
| Stubby   | $5090.3 \pm 660.7$ | $1.2 \pm 0.2\%$    | $48.1 \pm 6.2$             | $1797 \pm 233.3$ |

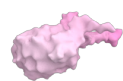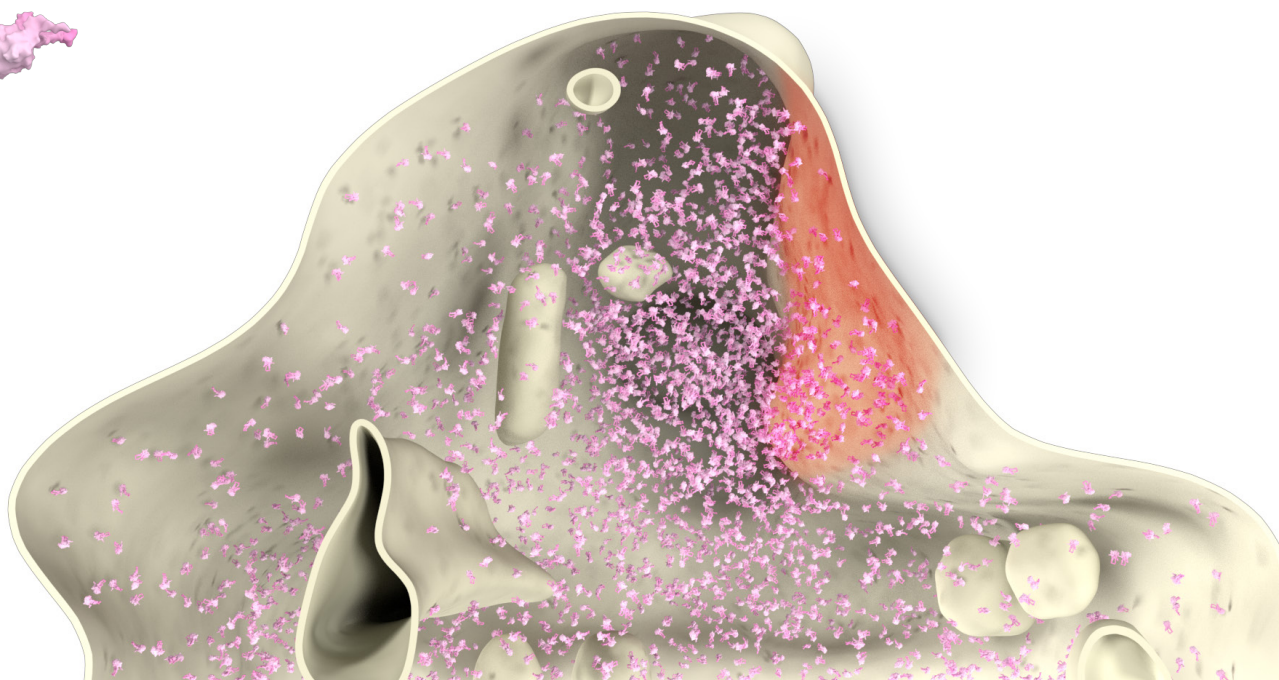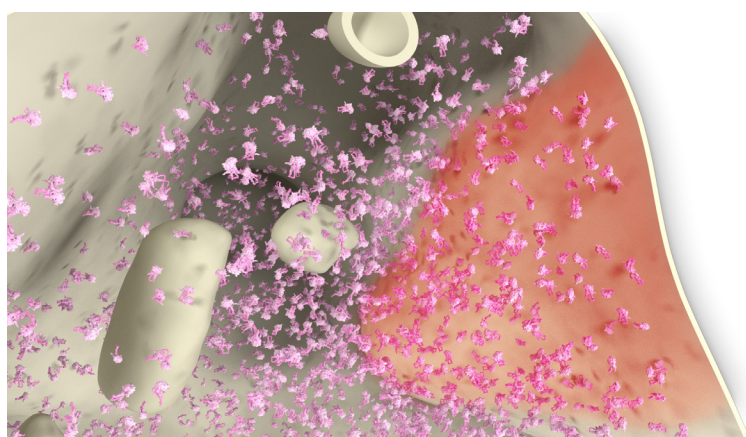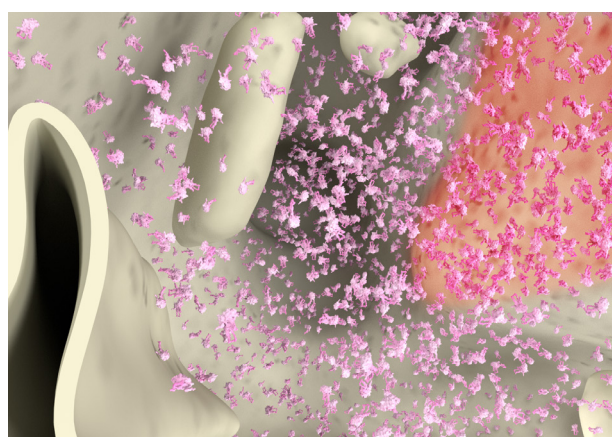

## References

**Antibody:** Synaptic Systems 387 002

**PDB Identifier:** 4il1

### Literature:

Coghlan et al., 1995, Science

Dawson et al., 1993, Proc. Natl. Acad. Sci. U S A

Day et al., 2002, J. Neurosci.

Fraser & Scott, 1999, Neuron

Goto et al., 1985, J. Neurochem.

Groth et al., 2003, Biochem. Biophys. Res. Comm.

Halpain et al., 1998, J. Neurosci.

Hernandez-Lopez et al., 2000, J. Neurosci.

Liebermann et al., 1994, Nature

Liu et al., 1994, Science

Mandelkow et al., 1995, Neurobiol.

Mulkey et al., 1994, Nature

Norris et al., 2002, Neuroscience

Tong et al., 1995, Science

Traynelis et al., 1997, J. Physiol.

Zeng et al., 2001, Cell



## Calmodulin (Gene: *Calm*, Uniprot ID: P0DP29)

**Known function:** Important calcium binding protein, Regulates over 100 target proteins.

**Known organization:** Cytosolic. Also membrane-attached via interaction with neurogranin

**Known Interactions:** CaMKII, Calcineurin, Calcium channels, nNOS, PSD95

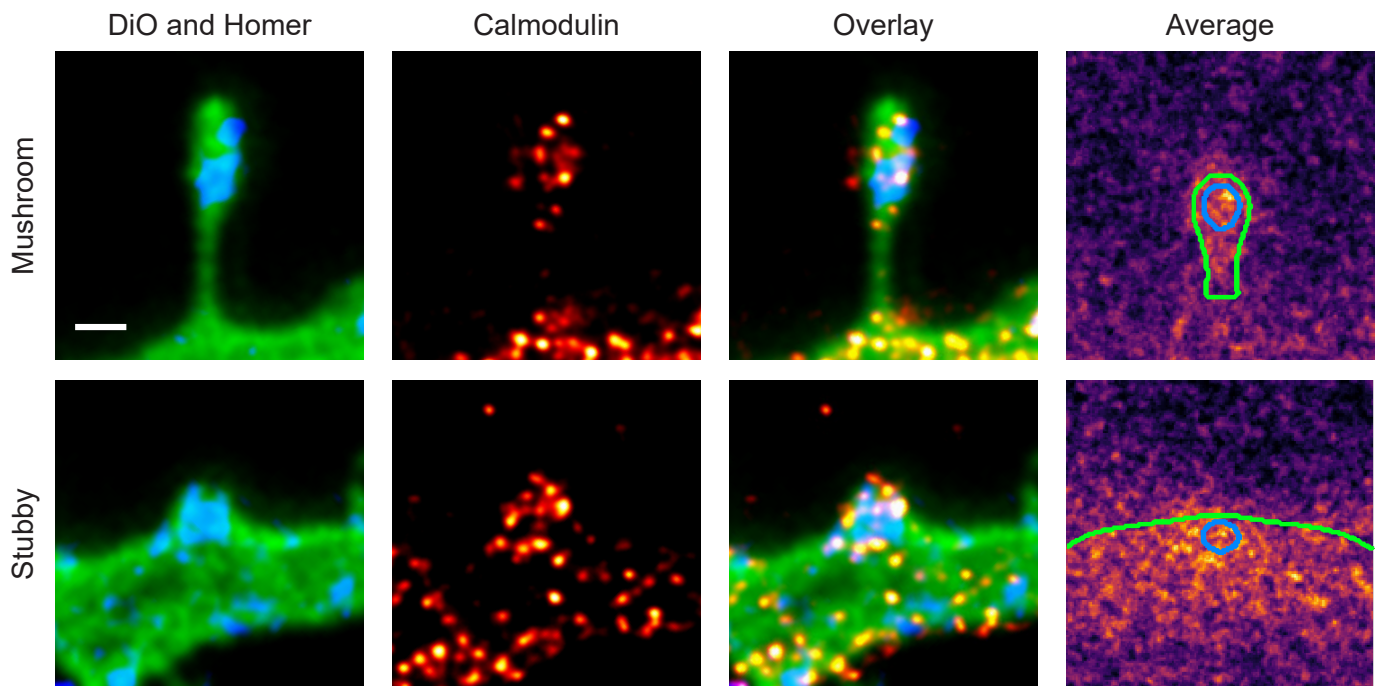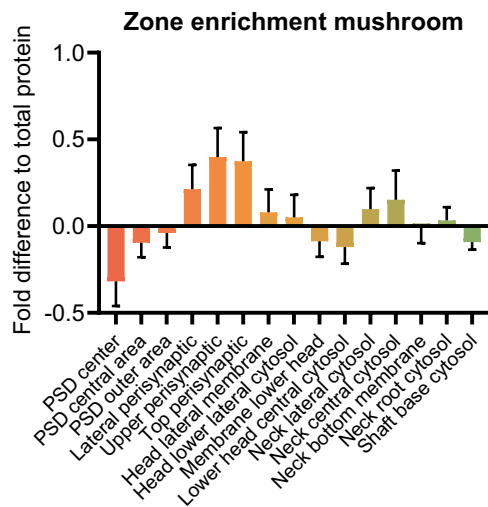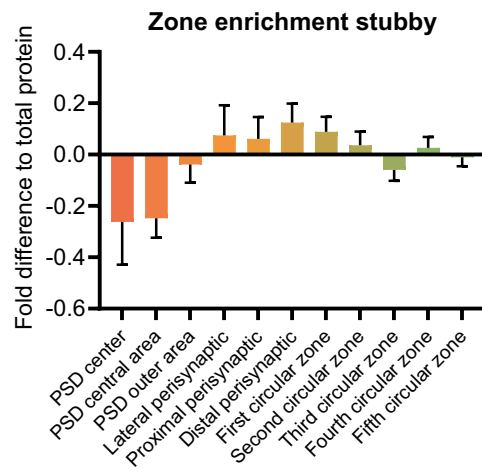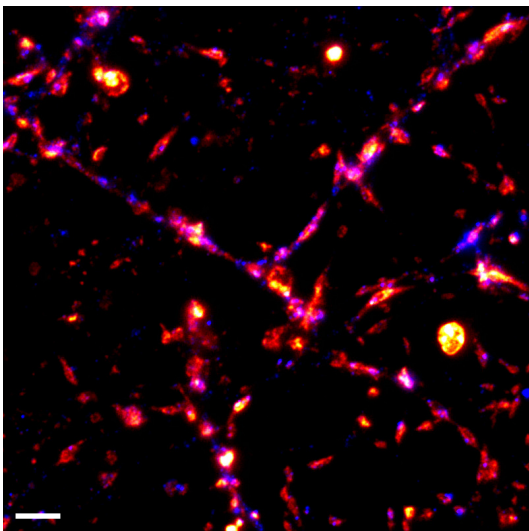

|                        |                          |                   |
|------------------------|--------------------------|-------------------|
| Whole cell copy number | 287210966.5 ± 61193722.7 |                   |
| Spine copy number      | 36712.8 ± 17167.3        |                   |
| Function               | Signaling                |                   |
|                        | Mushroom                 | Stubby            |
| Spine copy number      | 32696.6 ± 15289.2        | 39629.3 ± 18531.0 |
| % of total protein     | 2.7 ± 1.3%               | 2.8 ± 1.3%        |
| Molarity (μM)          | 415.2 ± 194.2            | 374.5 ± 175.1     |
| PSD copy number        | 6188 ± 2893.6            | 4793 ± 2241.3     |
| % in PSD               | 18.9 ± 8.8%              | 12.1 ± 5.7%       |

|          | Spine copy number     | % of total protein | Molarity ( $\mu\text{M}$ ) | PSD copy number   |
|----------|-----------------------|--------------------|----------------------------|-------------------|
| Mushroom | $32696.6 \pm 15289.2$ | $2.7 \pm 1.3\%$    | $415.2 \pm 194.2$          | $6188 \pm 2893.6$ |
| Stubby   | $39629.3 \pm 18531.0$ | $2.8 \pm 1.3\%$    | $374.5 \pm 175.1$          | $4793 \pm 2241.3$ |

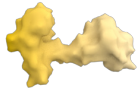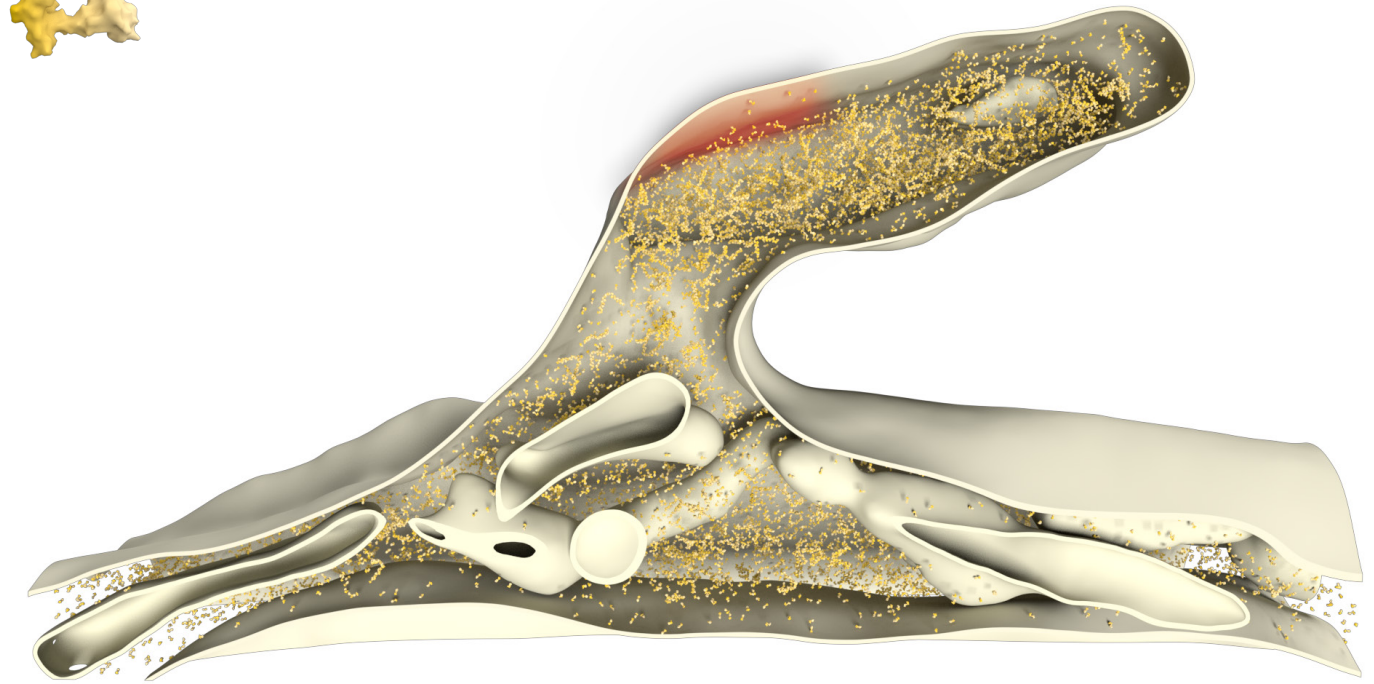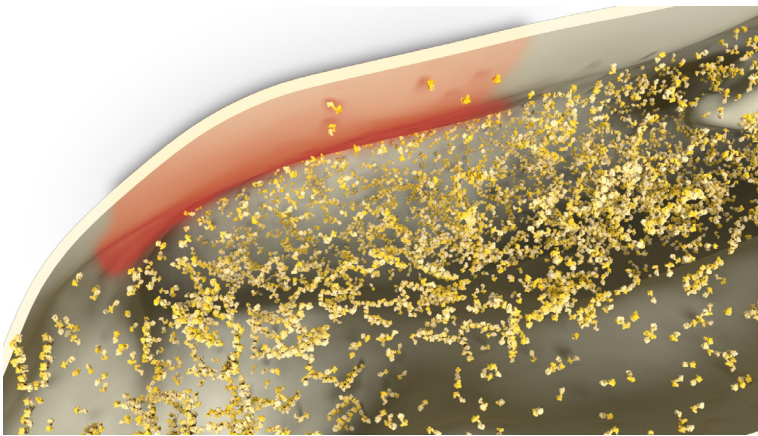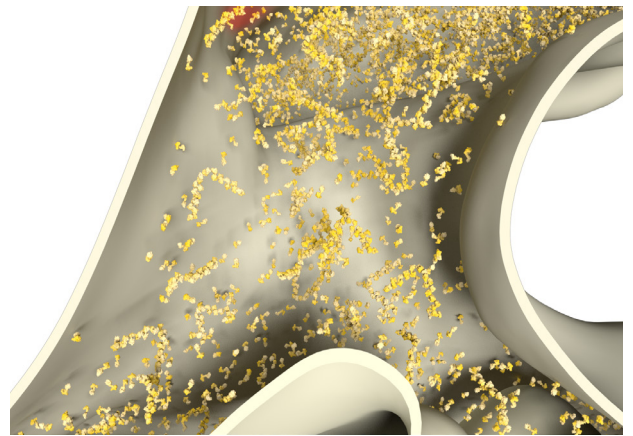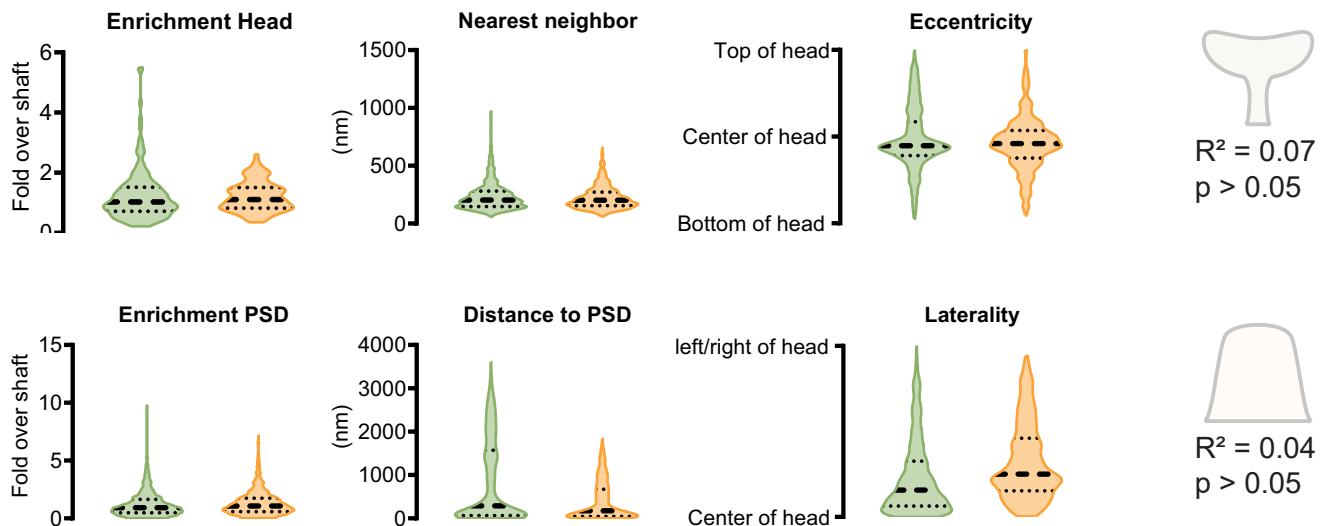



|          | Spine copy number     | % of total protein | Molarity ( $\mu\text{M}$ ) | PSD copy number   |
|----------|-----------------------|--------------------|----------------------------|-------------------|
| Mushroom | $32696.6 \pm 15289.2$ | $2.7 \pm 1.3\%$    | $415.2 \pm 194.2$          | $6188 \pm 2893.6$ |
| Stubby   | $39629.3 \pm 18531.0$ | $2.8 \pm 1.3\%$    | $374.5 \pm 175.1$          | $4793 \pm 2241.3$ |

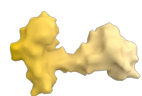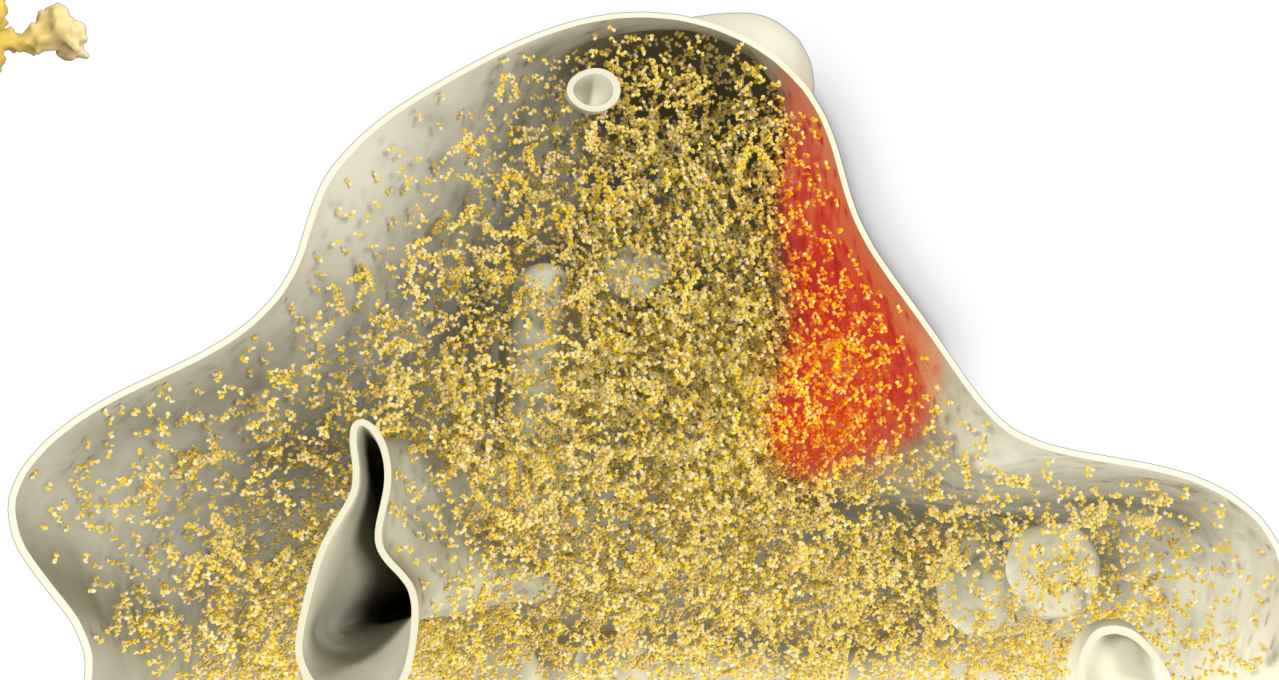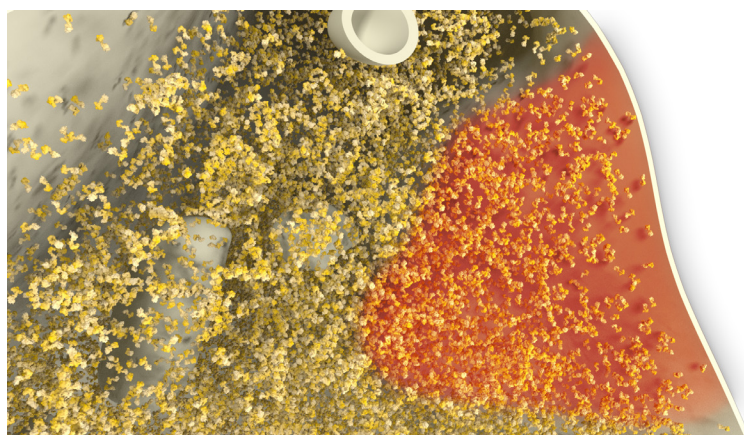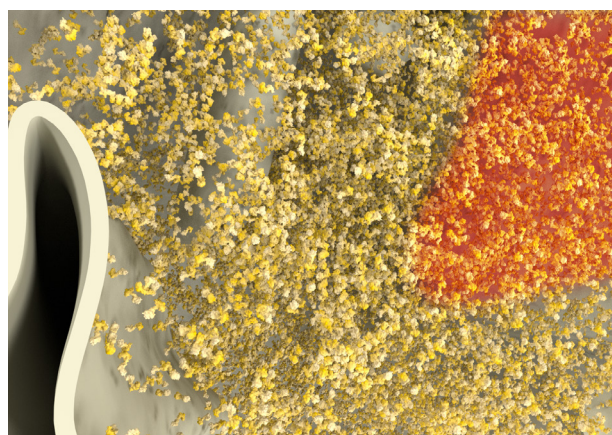

## References

**Antibody:** Abcam ab45689

**PDB Identifier:** 1up5

### Literature:

Bartos et al., 2010, J. Neurosci.

Baudier et al., 1991, J. Biol. Chem.

Chowdhury et al., 2017, EMBO J.

Fukunaga et al., 2005, J. Biochem

Olwin et al., 1984, Adv. Cyclic. Nucleotide Protein

Phosphorylation Res.

Prichard et al., 1999, J. Biol. Chem.

Xia and Storm, 2005, Nat. Rev. Neurosci.

Zhang et al., 2014, EMBO J.



## Calreticulin (CALBP, Gene: Calr, Uniprot ID: P18418)

**Known function:** ER resident chaperone, Calcium buffer

**Known organization:** ER lumen

**Known Interactions:** None

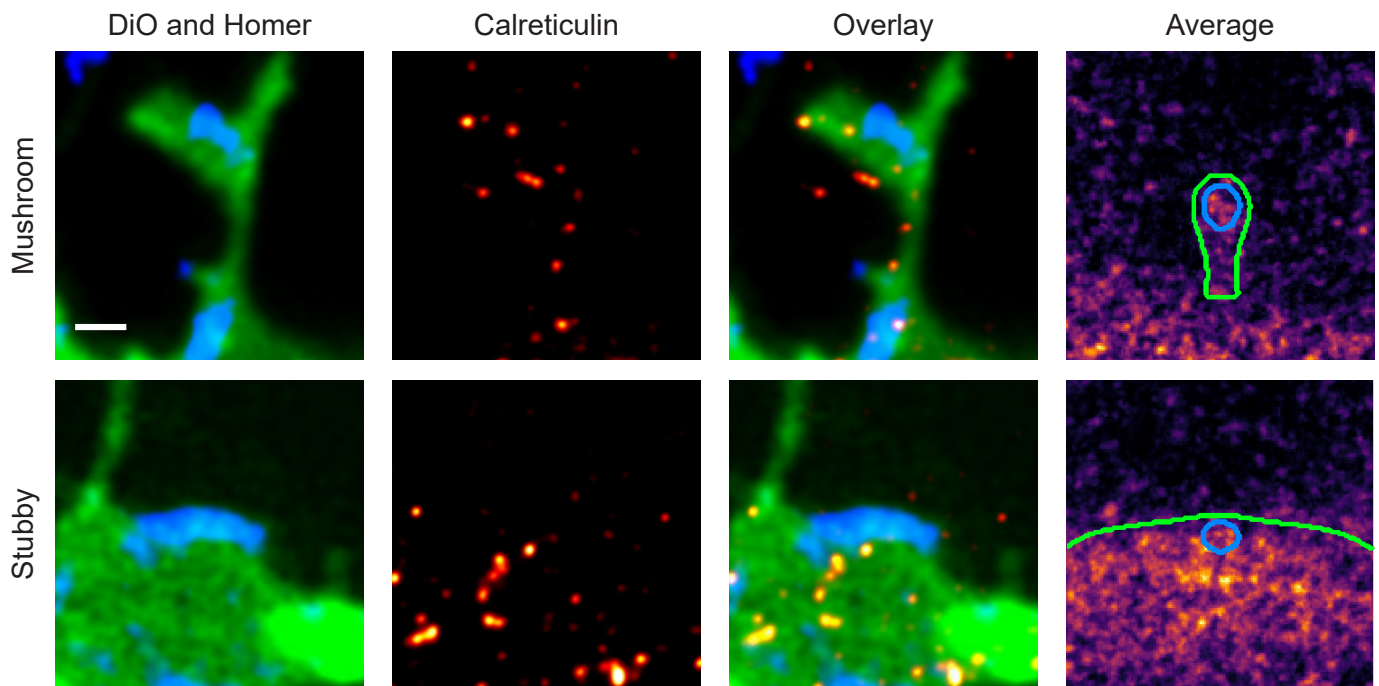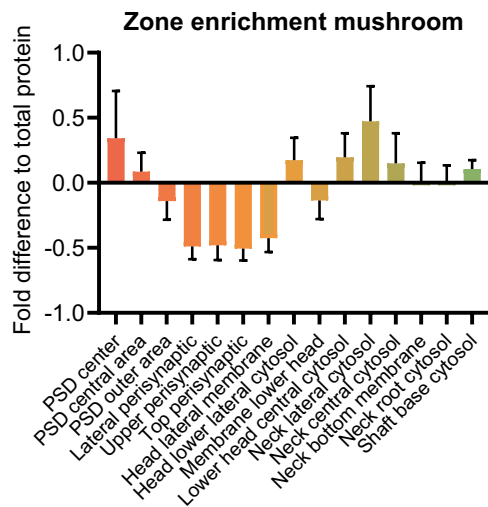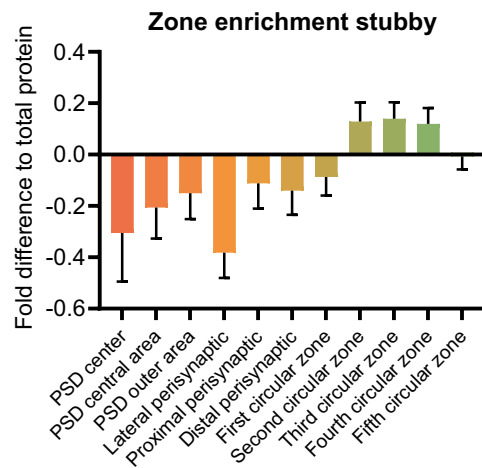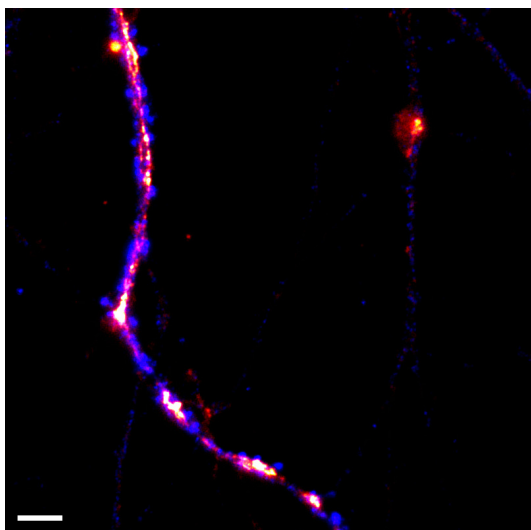

|                        |                        |                |
|------------------------|------------------------|----------------|
| Whole cell copy number | 24658920.2 ± 2226817.7 |                |
| Spine copy number      | 2222.9 ± 673.6         |                |
| Function               | Organelles             |                |
|                        | Mushroom               | Stubby         |
| Spine copy number      | 1479.3 ± 448.3         | 3126.5 ± 947.4 |
| % of total protein     | 0.3 ± 0.1%             | 0.6 ± 0.2%     |
| Molarity (μM)          | 18.8 ± 5.7             | 29.5 ± 9.0     |
| PSD copy number        | 0 ± 0.0                | 0 ± 0.0        |
| % in PSD               | 0.0 ± 0.0%             | 0.0 ± 0.0%     |

|          | Spine copy number  | % of total protein | Molarity ( $\mu\text{M}$ ) | PSD copy number |
|----------|--------------------|--------------------|----------------------------|-----------------|
| Mushroom | $1479.3 \pm 448.3$ | $0.3 \pm 0.1\%$    | $18.8 \pm 5.7$             | $0 \pm 0.0$     |
| Stubby   | $3126.5 \pm 947.4$ | $0.6 \pm 0.2\%$    | $29.5 \pm 9.0$             | $0 \pm 0.0$     |

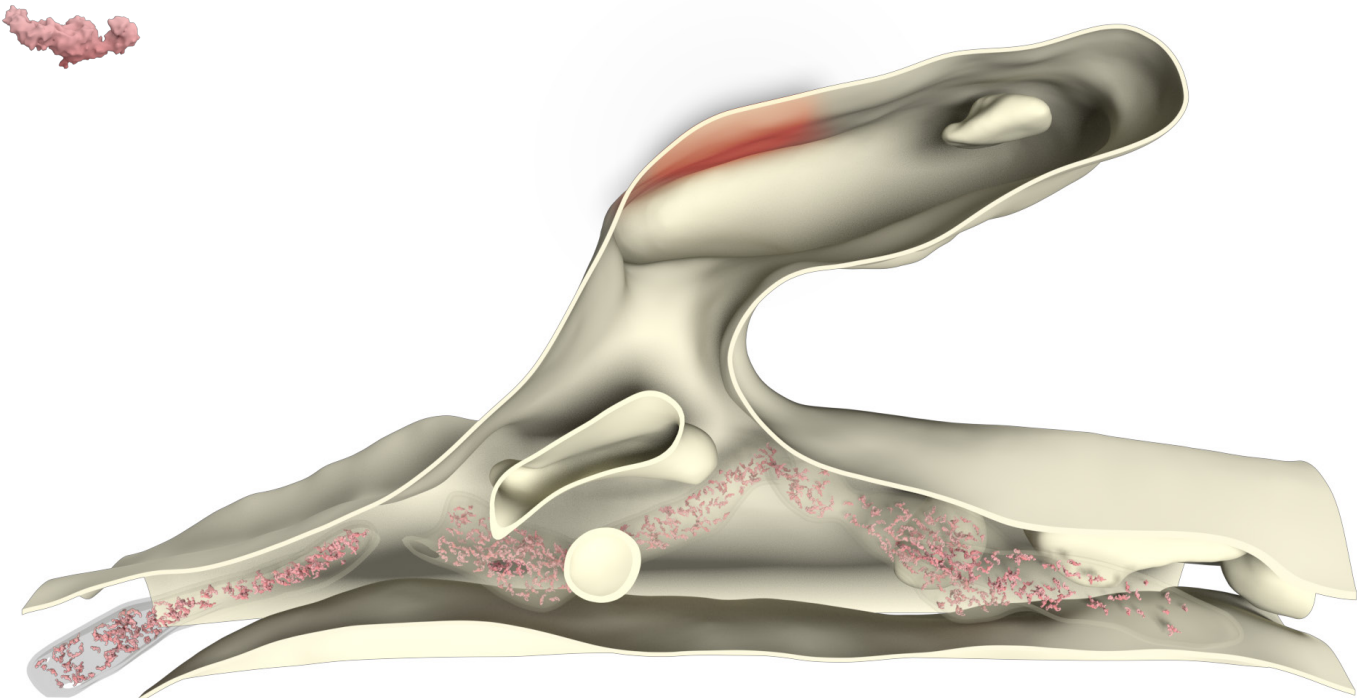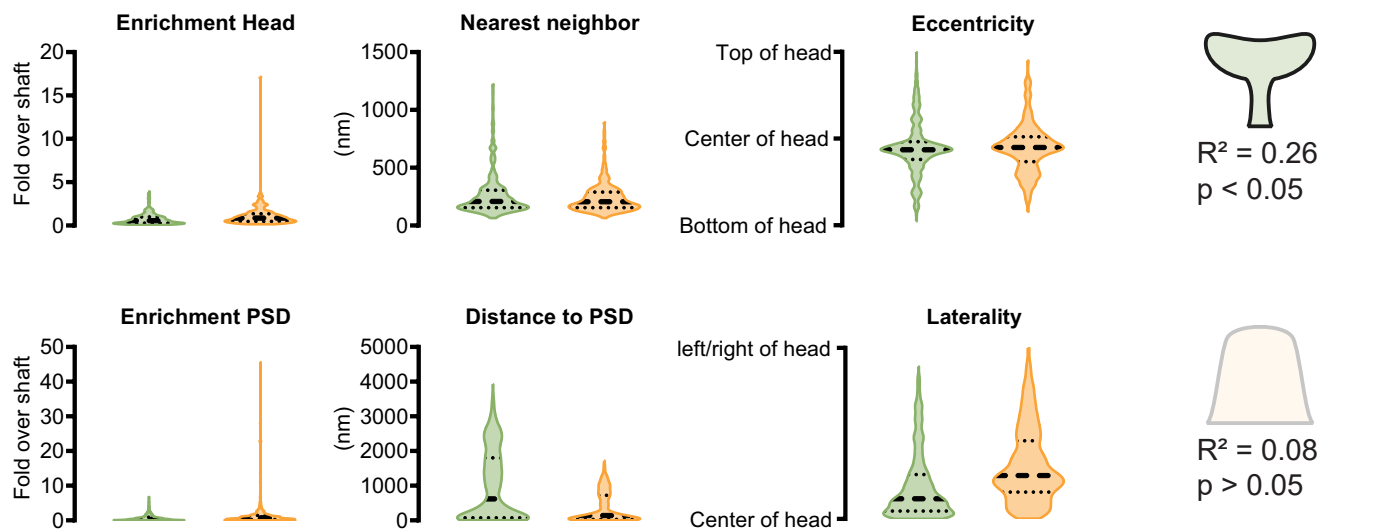

|          | Spine copy number  | % of total protein | Molarity ( $\mu\text{M}$ ) | PSD copy number |
|----------|--------------------|--------------------|----------------------------|-----------------|
| Mushroom | $1479.3 \pm 448.3$ | $0.3 \pm 0.1\%$    | $18.8 \pm 5.7$             | $0 \pm 0.0$     |
| Stubby   | $3126.5 \pm 947.4$ | $0.6 \pm 0.2\%$    | $29.5 \pm 9.0$             | $0 \pm 0.0$     |

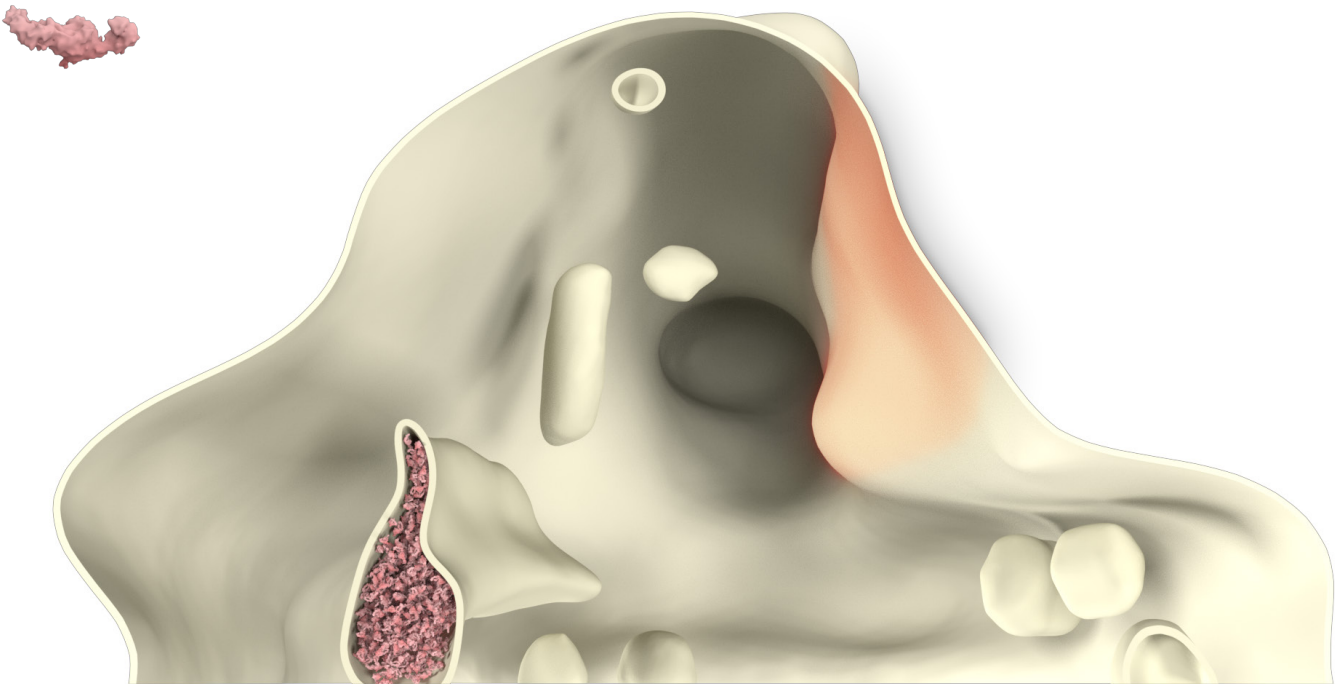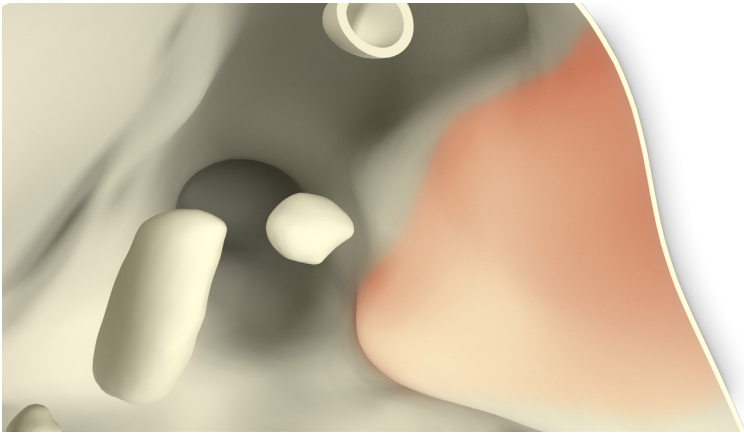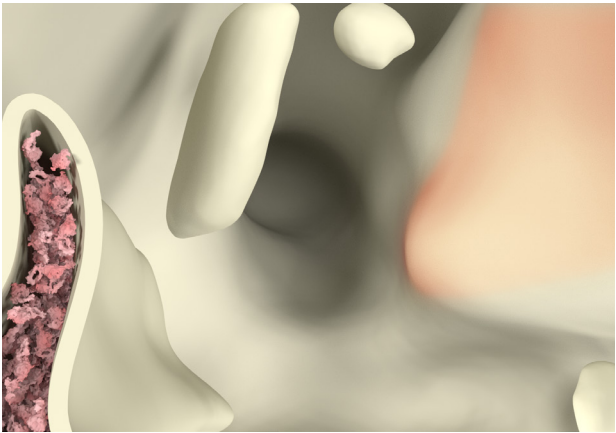

### References

**Antibody:** Cell Signaling 12238

**PDB Identifier:** 1hhn, 3o0v

**Literature:**

Bedard et al., 2005, Int. Rev. Cytol.  
Hebert and Molinari, 2007, Physiol Rev.  
Nakamura et al., 2001, J. Cell. Biol.



## Calretinin (Gene: Calb2, Uniprot ID: P47728)

**Known function:** Calcium binding protein

**Known organization:** Cytosolic

**Known Interactions:** Ca<sub>v</sub>2.1

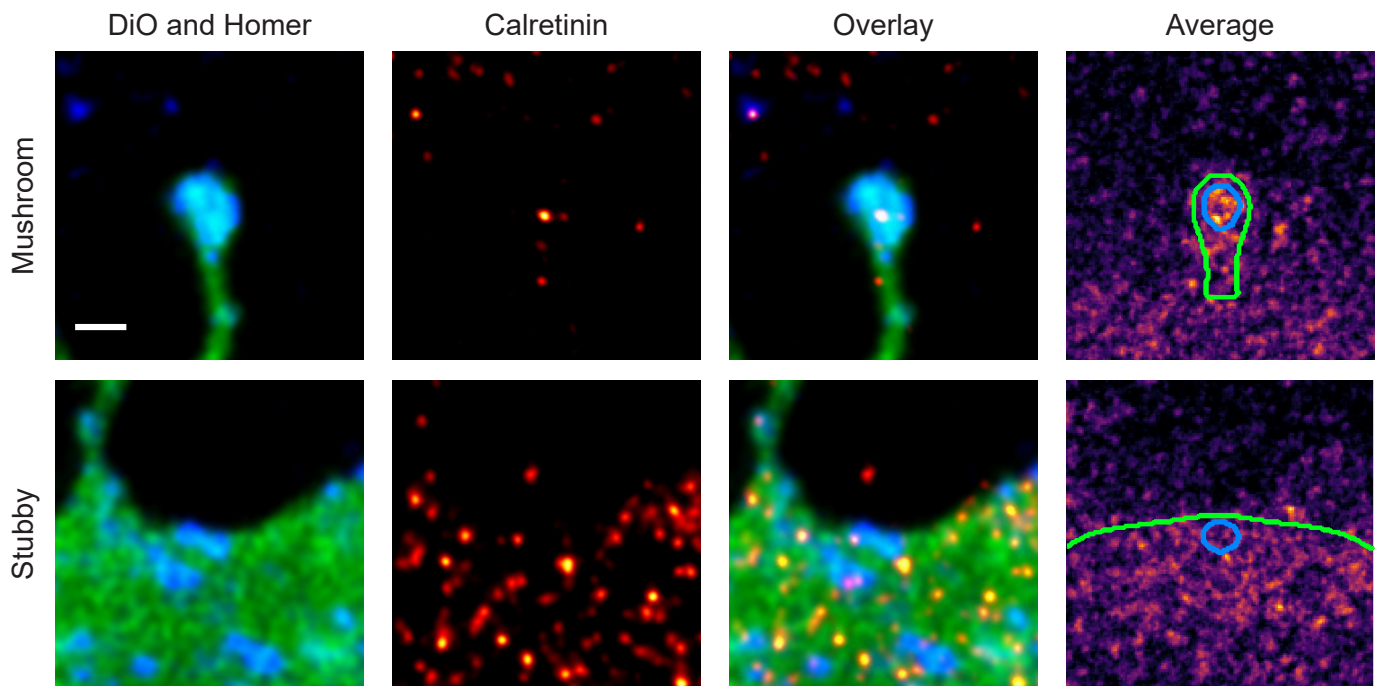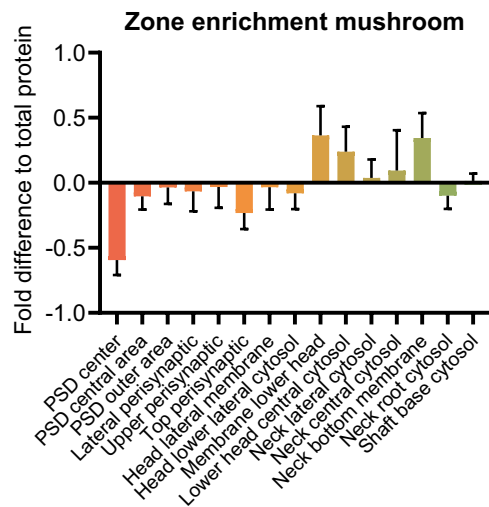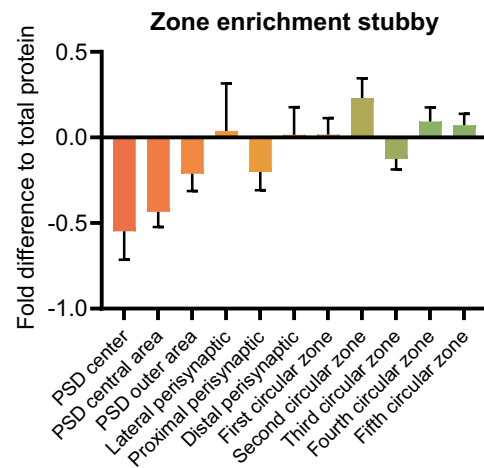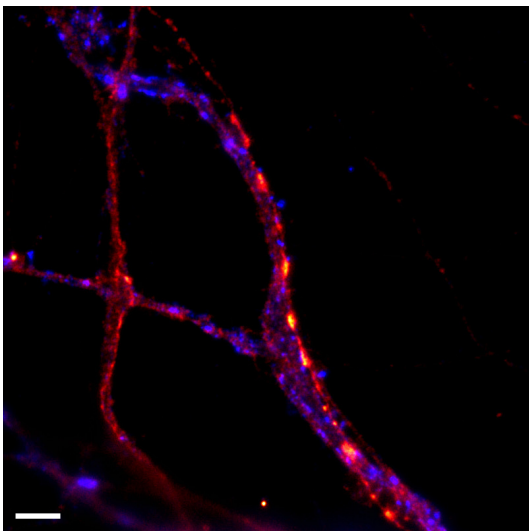

|                        |                     |             |
|------------------------|---------------------|-------------|
| Whole cell copy number | 914295.6 ± 370757.9 |             |
| Spine copy number      | 66.2 ± 34.4         |             |
| Function               | Signaling           |             |
|                        | Mushroom            | Stubby      |
| Spine copy number      | 59.0 ± 30.7         | 73.2 ± 38.1 |
| % of total protein     | 0.0 ± 0.0%          | 0.0 ± 0.0%  |
| Molarity (μM)          | 0.7 ± 0.4           | 0.7 ± 0.4   |
| PSD copy number        | 12 ± 6.2            | 4 ± 2.1     |
| % in PSD               | 20.3 ± 10.6%        | 10.6 ± 5.5% |

|          | Spine copy number | % of total protein | Molarity ( $\mu\text{M}$ ) | PSD copy number |
|----------|-------------------|--------------------|----------------------------|-----------------|
| Mushroom | $59.0 \pm 30.7$   | $0.0 \pm 0.0\%$    | $0.7 \pm 0.4$              | $12 \pm 6.2$    |
| Stubby   | $73.2 \pm 38.1$   | $0.0 \pm 0.0\%$    | $0.7 \pm 0.4$              | $4 \pm 2.1$     |

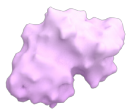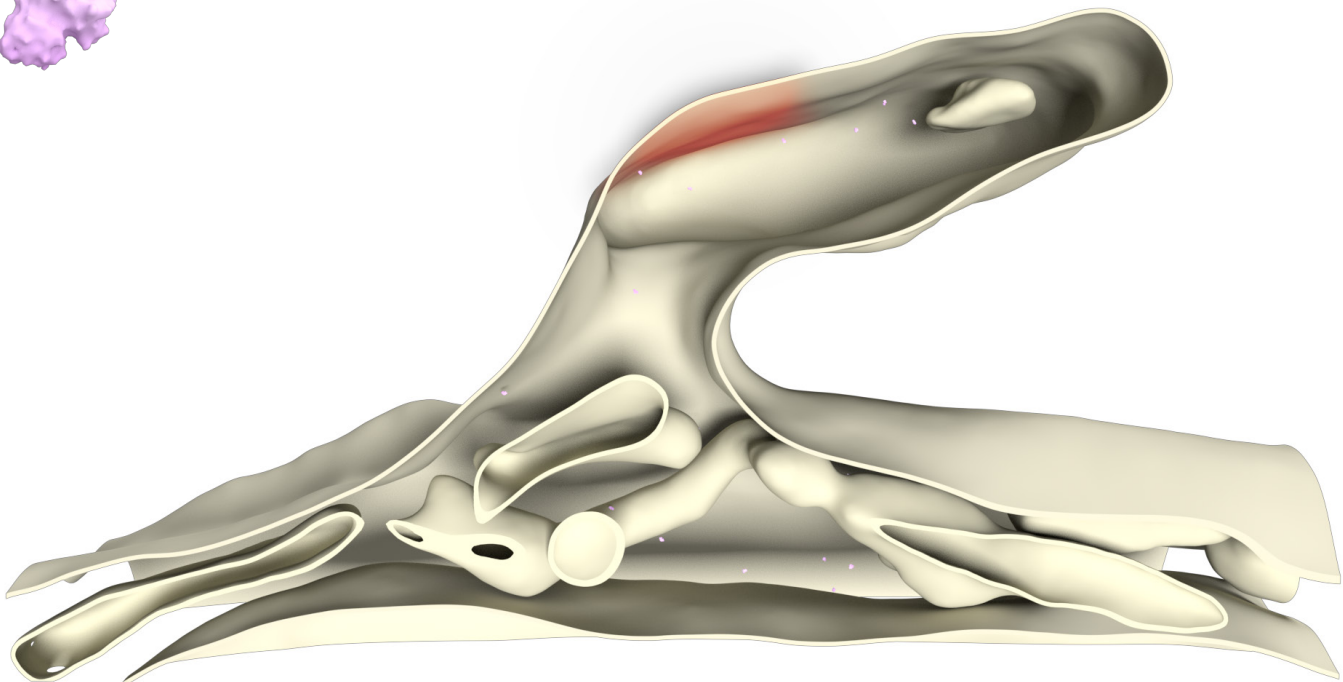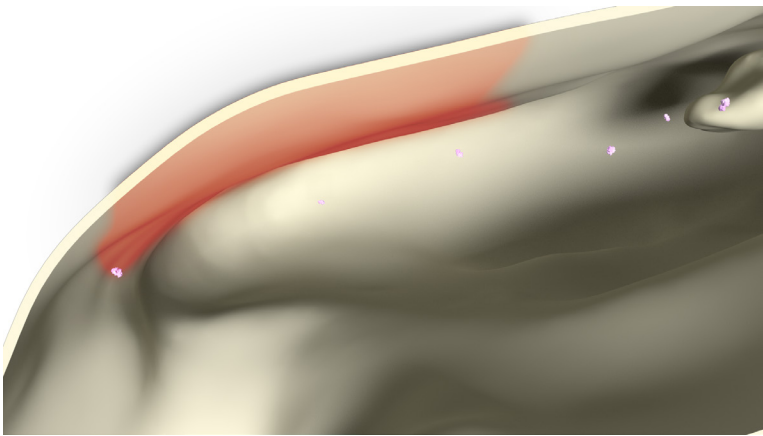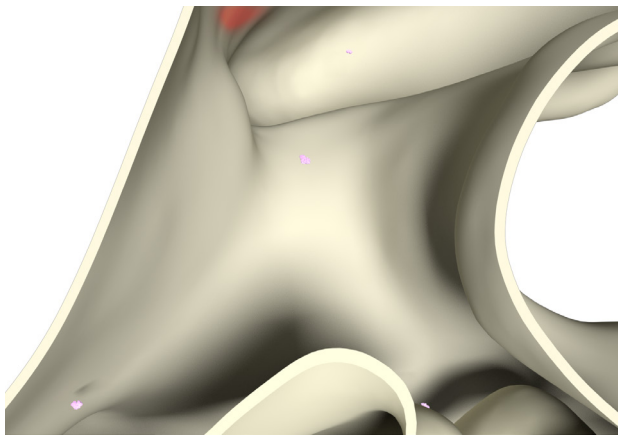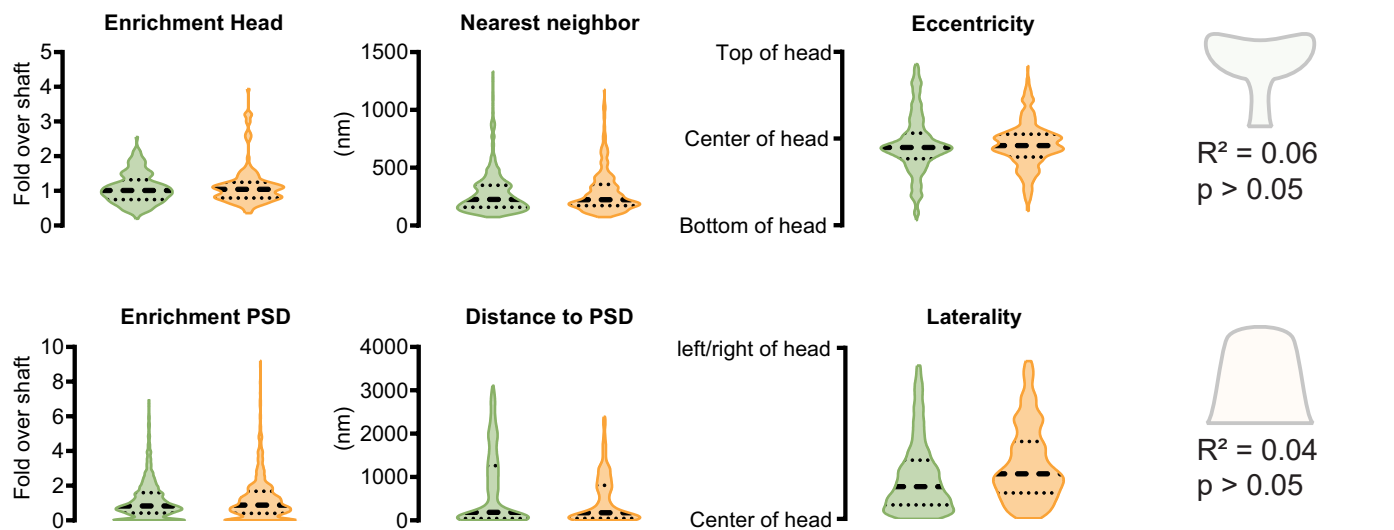

|          | Spine copy number | % of total protein | Molarity ( $\mu\text{M}$ ) | PSD copy number |
|----------|-------------------|--------------------|----------------------------|-----------------|
| Mushroom | $59.0 \pm 30.7$   | $0.0 \pm 0.0\%$    | $0.7 \pm 0.4$              | $12 \pm 6.2$    |
| Stubby   | $73.2 \pm 38.1$   | $0.0 \pm 0.0\%$    | $0.7 \pm 0.4$              | $4 \pm 2.1$     |

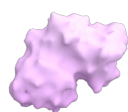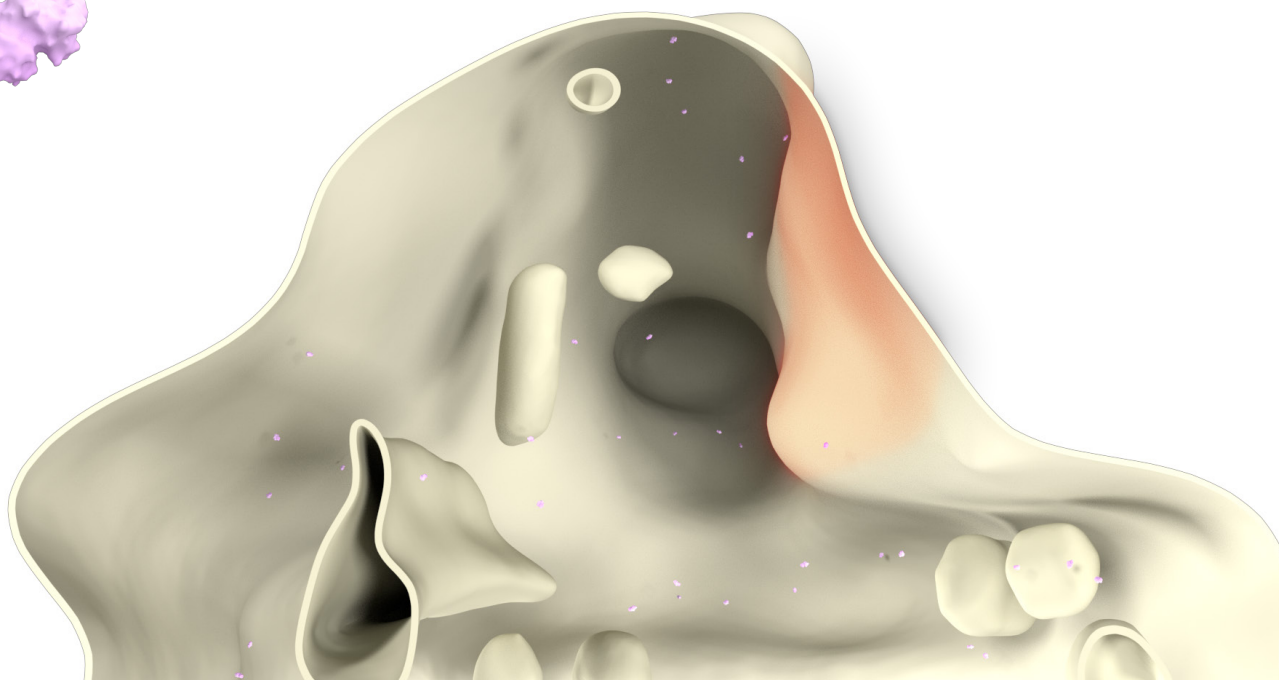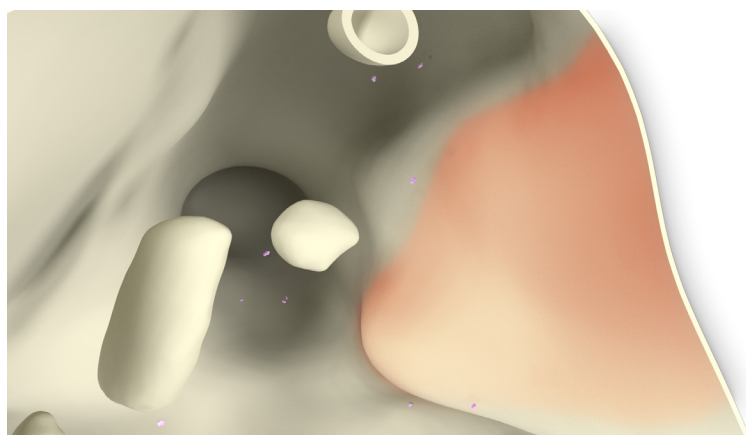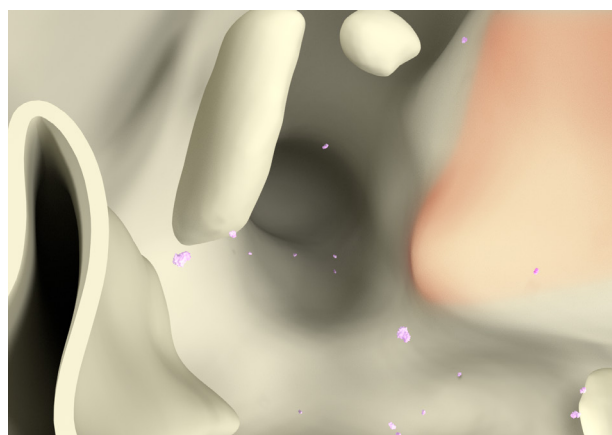

## References

**Antibody:** Novus Biologicals NBP1-88220

**PDB Identifier:** Modelled with I-TASSER

### Literature:

Christel et al., 2012, J. Biol. Chem.

Dargan et al., 2004, J. Physiol.

Molgaard et al., 2014, F1000Res.



**CaMKII  $\alpha/\beta$  (Genes: Camk2a, Camk2b Uniprot ID: P11275, P08413)**

**Known function:** Central kinase in dendritic spines, Involved in synaptic plasticity

**Known organization:** Cytosolic, Forms dodecamer

**Known Interactions:** AMPA receptors, Calmodulin, Ca<sub>v</sub>2.1, CDC42, GluN2B, Homer proteins, PSD95, F-actin

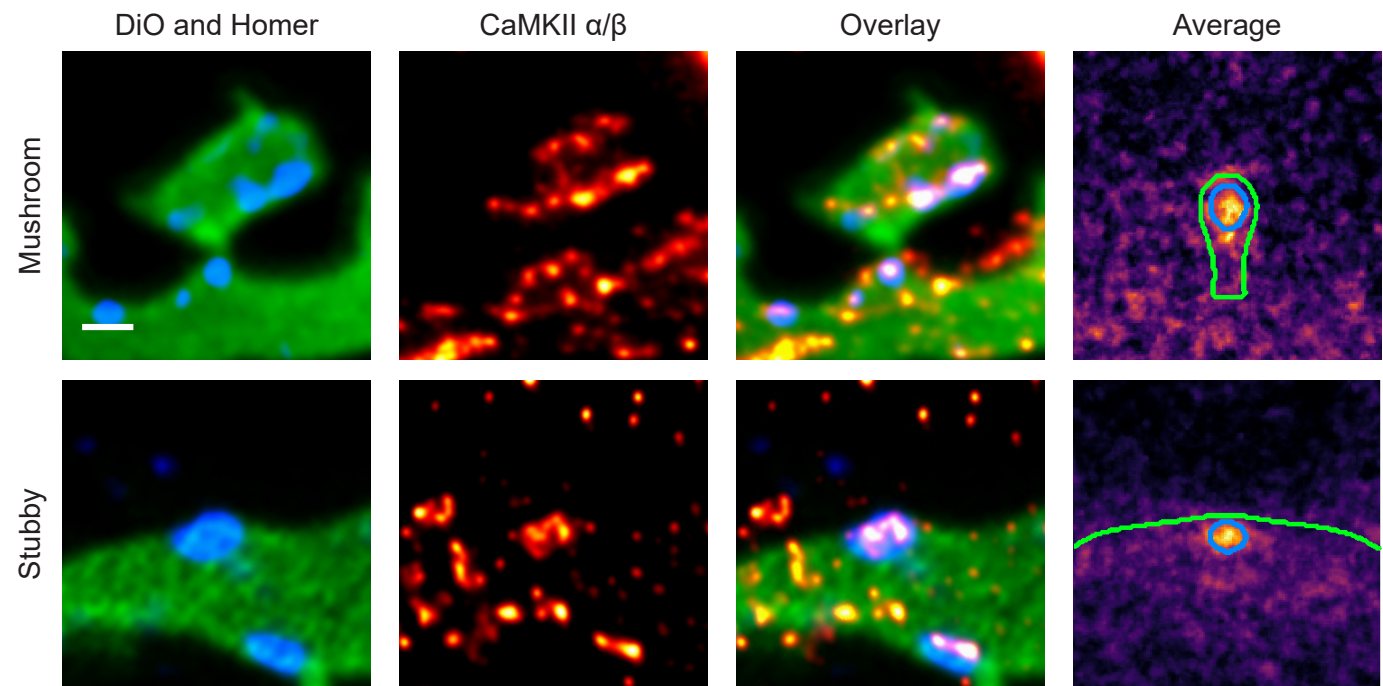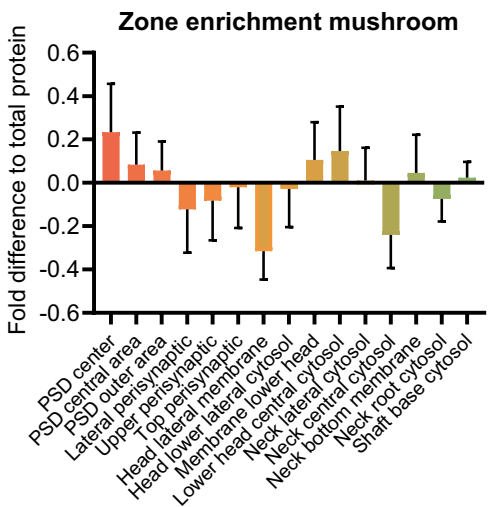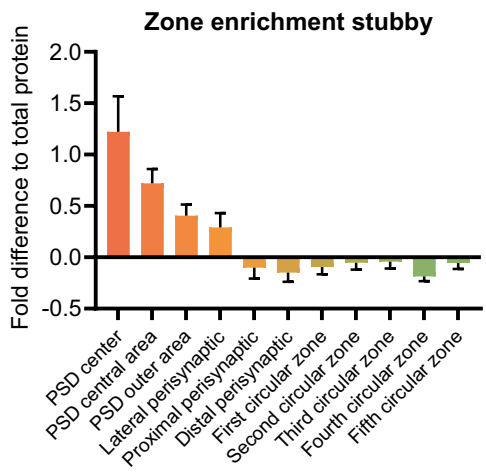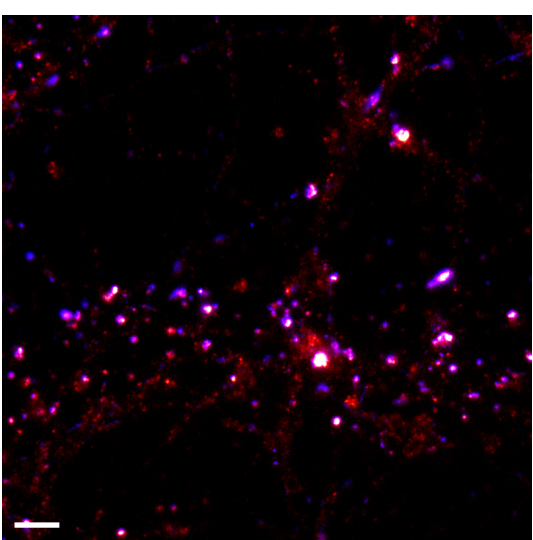

|                        |                            |                      |
|------------------------|----------------------------|----------------------|
| Whole cell copy number | 40160274.0 $\pm$ 3071548.5 |                      |
| Spine copy number      | 32336.3 $\pm$ 4031.2       |                      |
| Function               | Signaling                  |                      |
|                        | Mushroom                   | Stubby               |
| Spine copy number      | 25863.6 $\pm$ 3224.3       | 42099.6 $\pm$ 5248.3 |
| % of total protein     | 7.9 $\pm$ 1.0%             | 11.0 $\pm$ 1.4%      |
| Molarity ( $\mu$ M)    | 328.5 $\pm$ 40.9           | 397.9 $\pm$ 49.6     |
| PSD copy number        | 7337 $\pm$ 914.7           | 19450 $\pm$ 2424.7   |
| % in PSD               | 28.4 $\pm$ 3.5%            | 46.2 $\pm$ 5.8%      |

|          | Spine copy number    | % of total protein | Molarity ( $\mu\text{M}$ ) | PSD copy number    |
|----------|----------------------|--------------------|----------------------------|--------------------|
| Mushroom | $25863.6 \pm 3224.3$ | $7.9 \pm 1.0\%$    | $328.5 \pm 40.9$           | $7337 \pm 914.7$   |
| Stubby   | $42099.6 \pm 5248.3$ | $11.0 \pm 1.4\%$   | $397.9 \pm 49.6$           | $19450 \pm 2424.7$ |

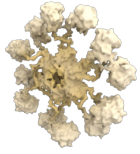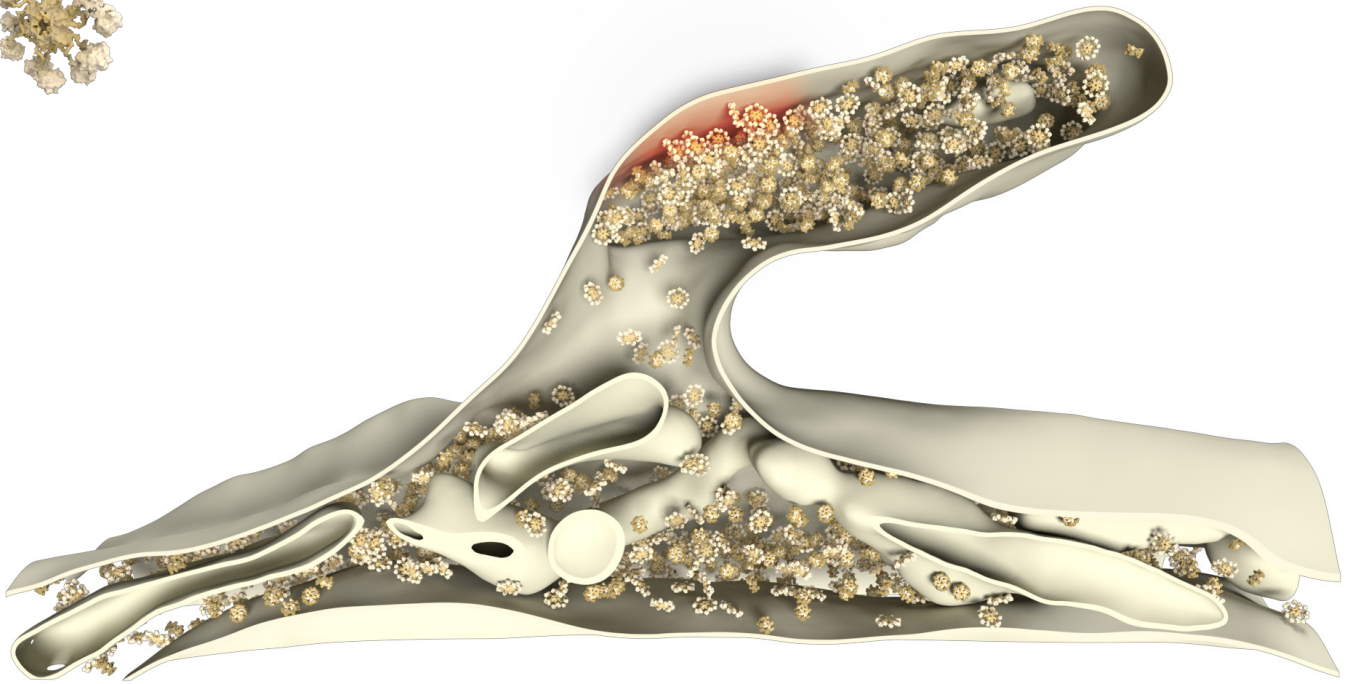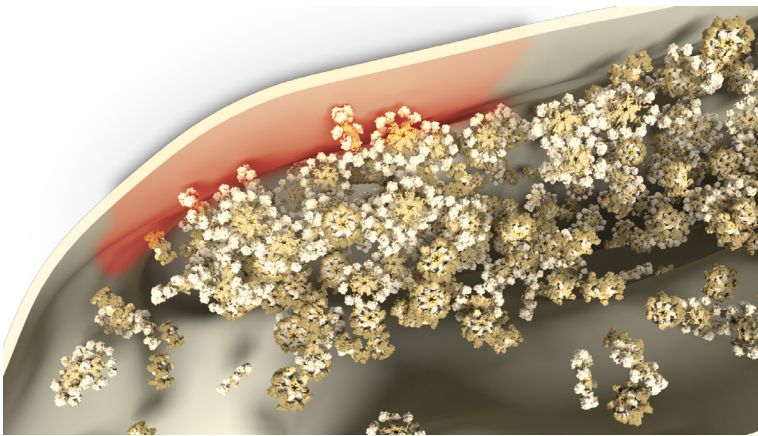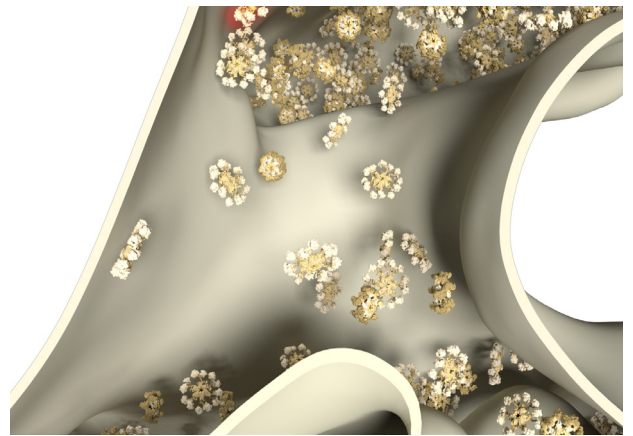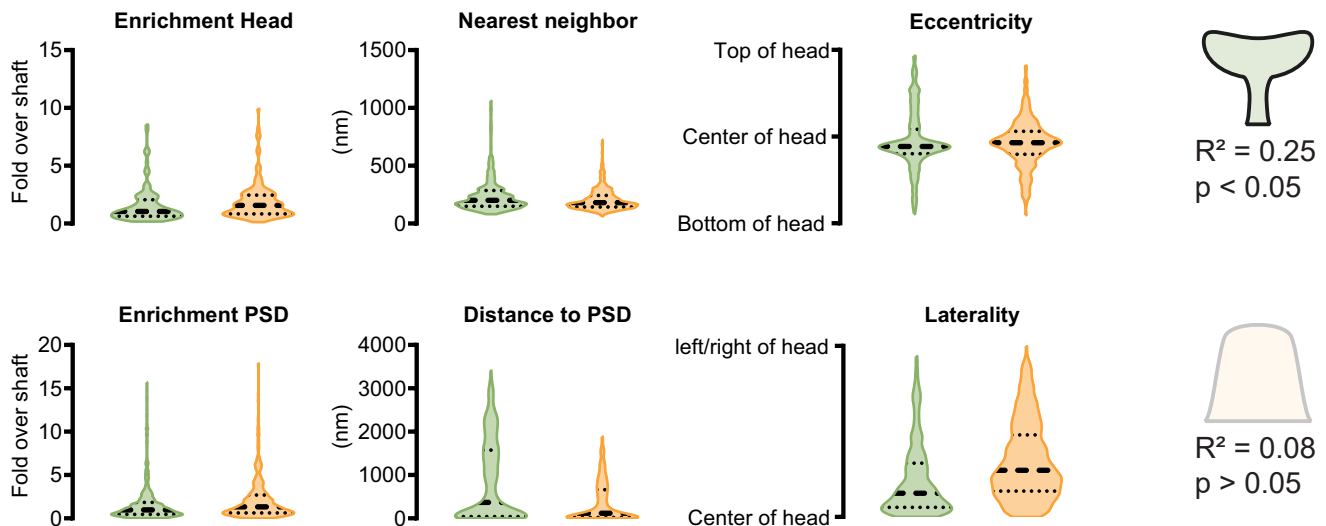



|          | Spine copy number    | % of total protein | Molarity ( $\mu\text{M}$ ) | PSD copy number    |
|----------|----------------------|--------------------|----------------------------|--------------------|
| Mushroom | $25863.6 \pm 3224.3$ | $7.9 \pm 1.0\%$    | $328.5 \pm 40.9$           | $7337 \pm 914.7$   |
| Stubby   | $42099.6 \pm 5248.3$ | $11.0 \pm 1.4\%$   | $397.9 \pm 49.6$           | $19450 \pm 2424.7$ |

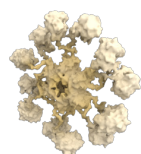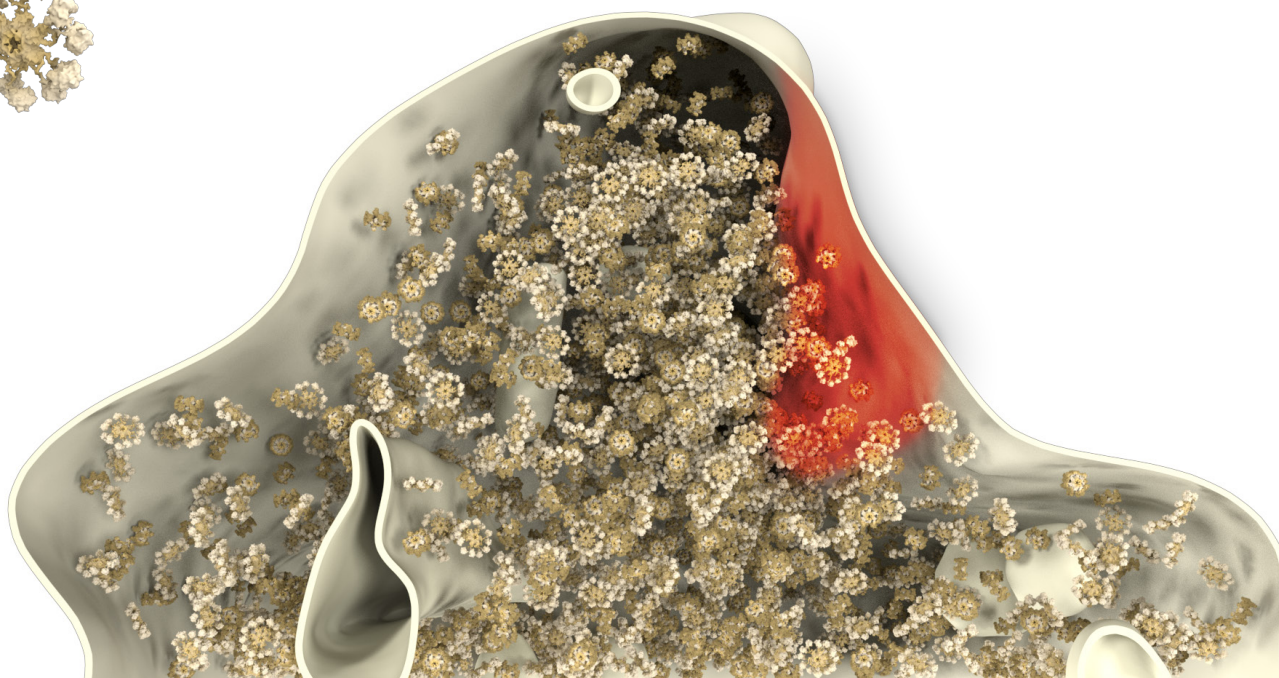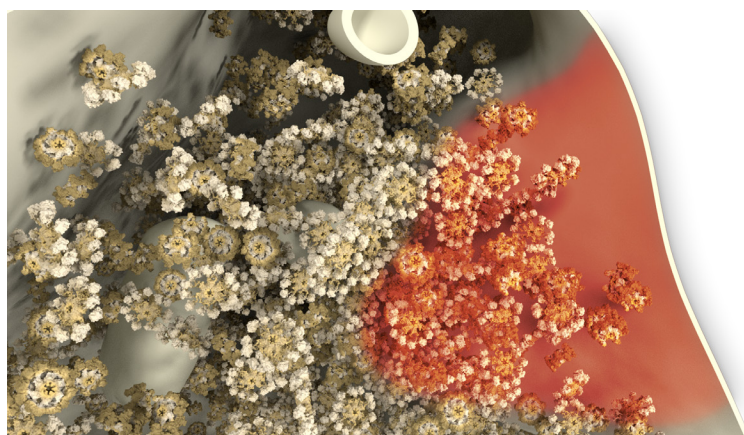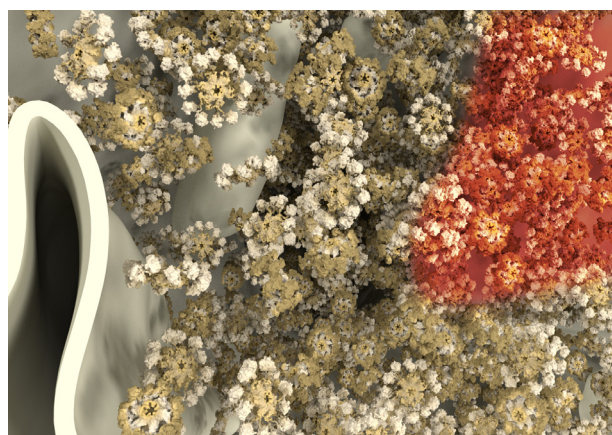

## References

**Antibody:** Abnova MAB6627

**PDB Identifier:** 5u6y

### Literature:

Barria et al., 1997, Science

Braun and Schulman, 1995, Annu. Rev. Physiol.

Chao et al., 2011, Cell

Colbran and Brown, 2004, Curr. Opin. Neurobiol.

Fink et al., 2003, Neuron

Gardoni et al., 2006, Eur. J. Neurosci.

Halt et al., 2012, EMBO J.

Hell, 2014, Neuron

Jiang et al., 2008, Proc. Natl. Acad. Sci. U S A

Matsuzaki et al., 2004, Nature

McGlade-McCulloh et al., 1993, Nature

Mizutani et al., 2008, J. Neurosci.

Murakoshi et al., 2011, Nature

Shen and Meyer, 1999, Science

Zhou et al., 2007, J. Neurosci.



CAPS1 (Gene: Cadps, Uniprot ID: Q62717)

Known function: Regulates LDCV and secretory granule exocytosis

Known organization: Cytosolic

Known Interactions: None

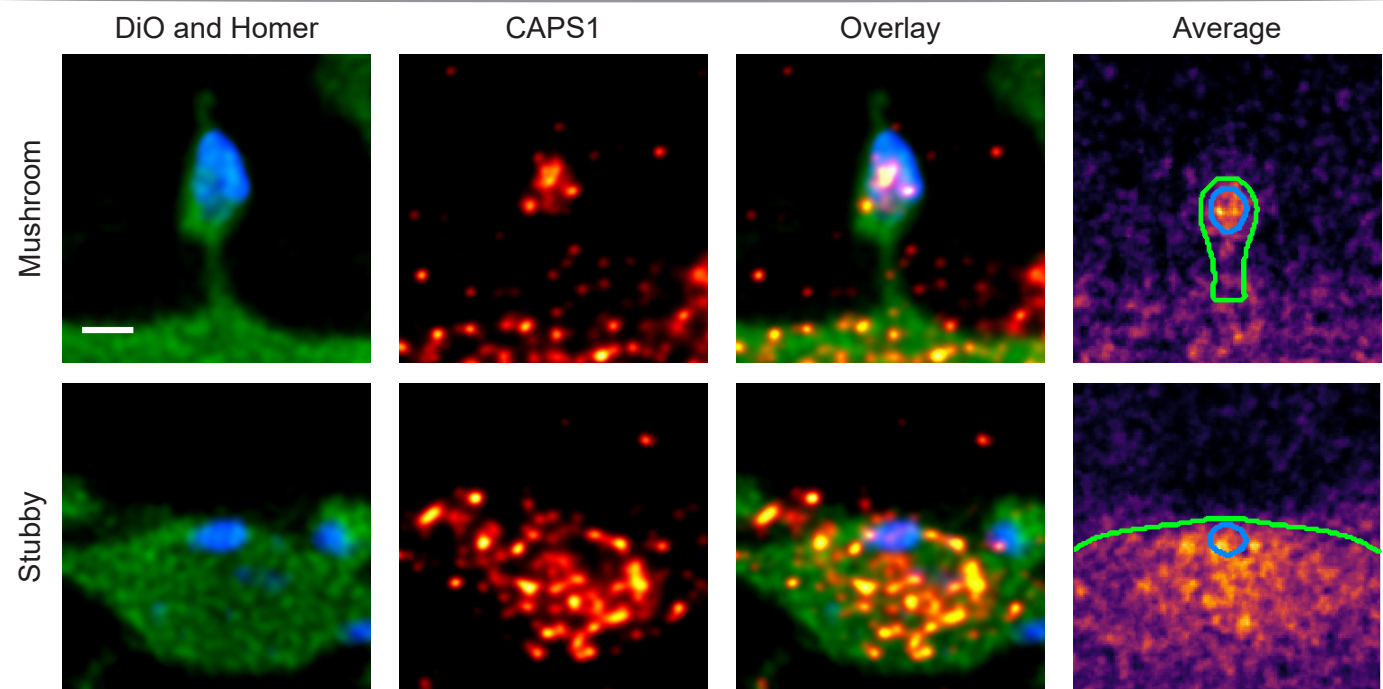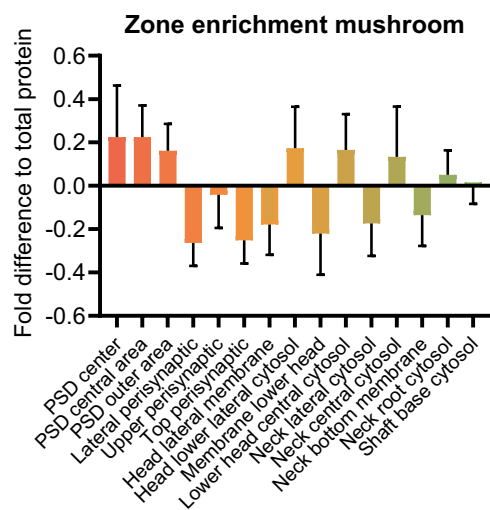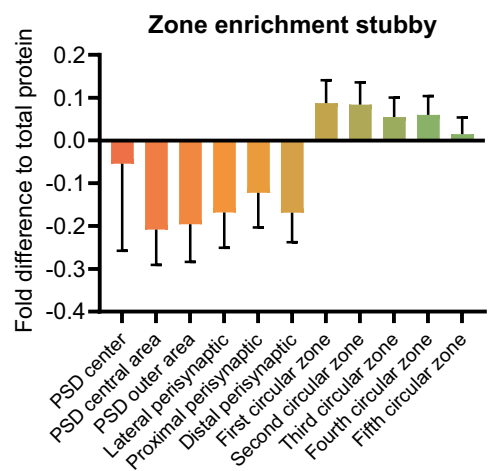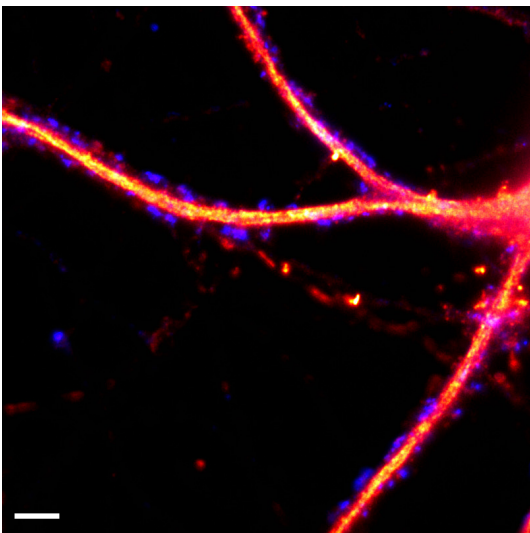

|                        |                    |              |
|------------------------|--------------------|--------------|
| Whole cell copy number | 571879.4 ± 18123.2 |              |
| Spine copy number      | 218.8 ± 35.4       |              |
| Function               | Signaling          |              |
|                        | Mushroom           | Stubby       |
| Spine copy number      | 179.6 ± 29.1       | 290.2 ± 47.0 |
| % of total protein     | 0.1 ± 0.0%         | 0.2 ± 0.0%   |
| Molarity (µM)          | 2.3 ± 0.4          | 2.7 ± 0.4    |
| PSD copy number        | 52 ± 8.4           | 35 ± 5.7     |
| % in PSD               | 29.0 ± 4.7%        | 12.1 ± 2.0%  |

|          | Spine copy number | % of total protein | Molarity ( $\mu\text{M}$ ) | PSD copy number |
|----------|-------------------|--------------------|----------------------------|-----------------|
| Mushroom | $179.6 \pm 29.1$  | $0.1 \pm 0.0\%$    | $2.3 \pm 0.4$              | $52 \pm 8.4$    |
| Stubby   | $290.2 \pm 47.0$  | $0.2 \pm 0.0\%$    | $2.7 \pm 0.4$              | $35 \pm 5.7$    |

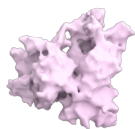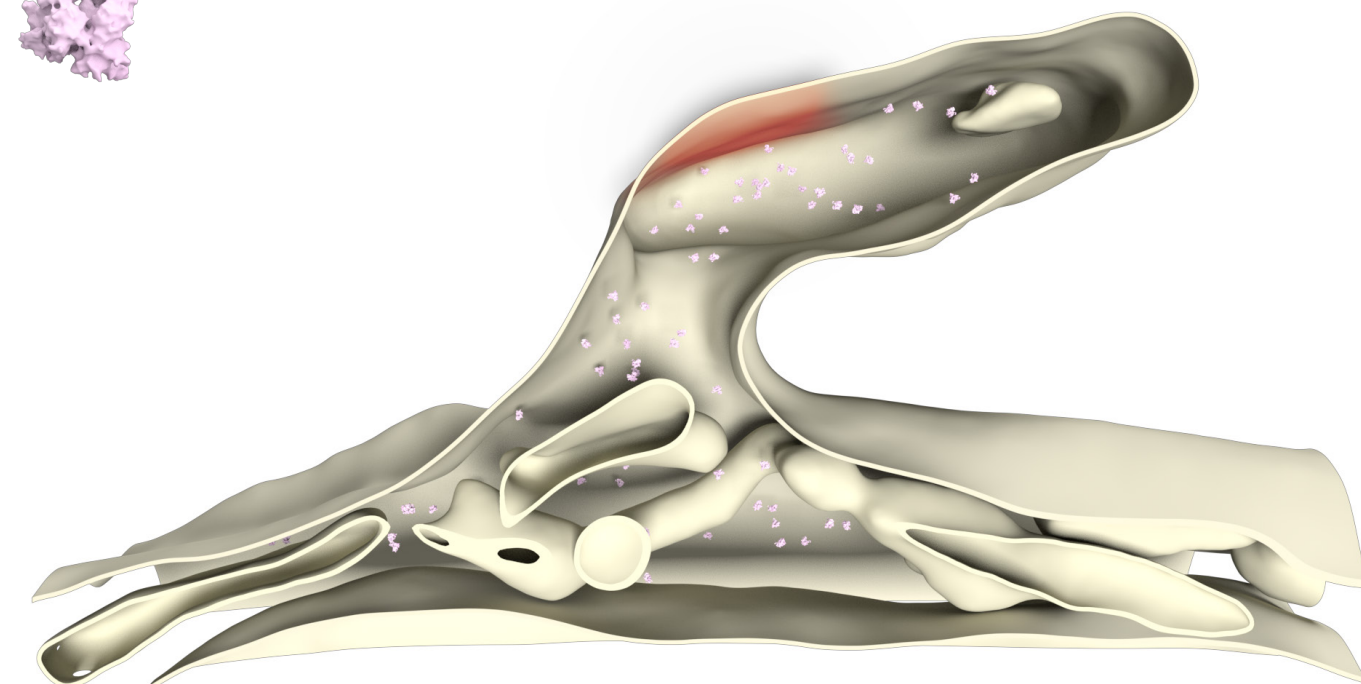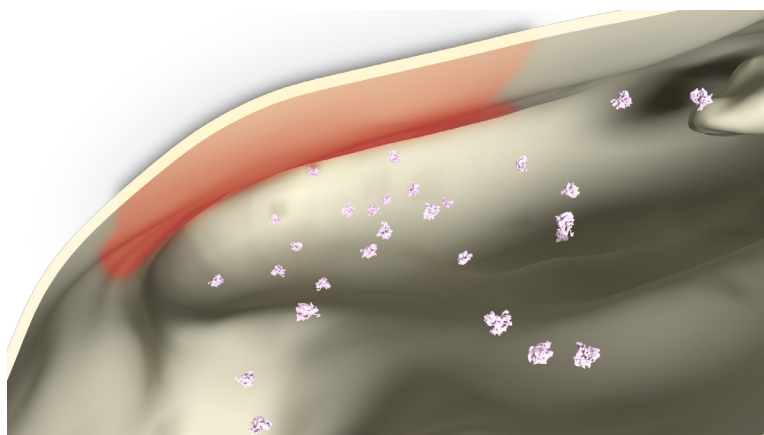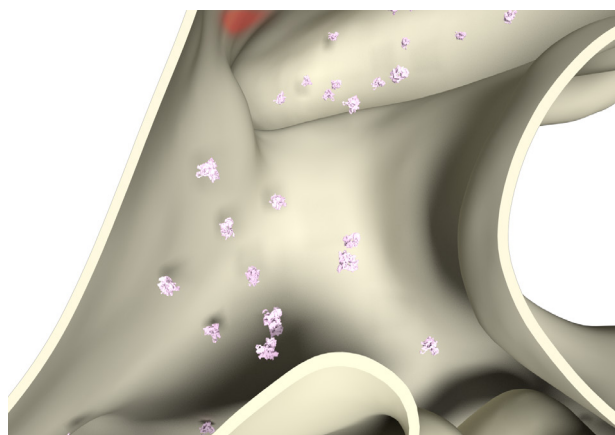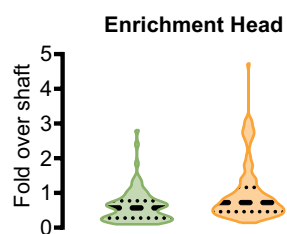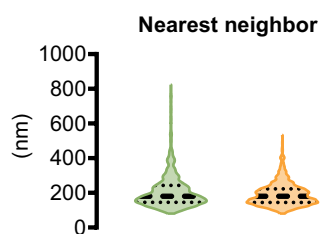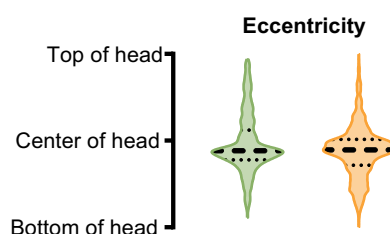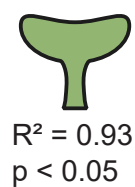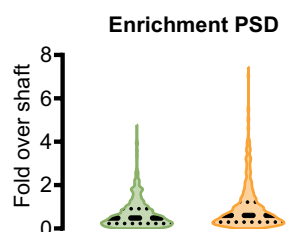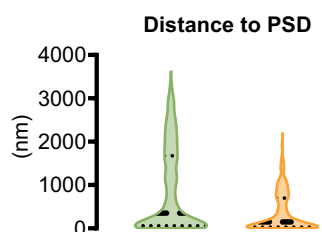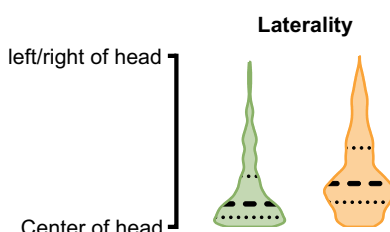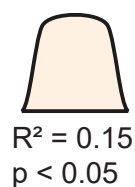

|          | Spine copy number | % of total protein | Molarity ( $\mu\text{M}$ ) | PSD copy number |
|----------|-------------------|--------------------|----------------------------|-----------------|
| Mushroom | $179.6 \pm 29.1$  | $0.1 \pm 0.0\%$    | $2.3 \pm 0.4$              | $52 \pm 8.4$    |
| Stubby   | $290.2 \pm 47.0$  | $0.2 \pm 0.0\%$    | $2.7 \pm 0.4$              | $35 \pm 5.7$    |

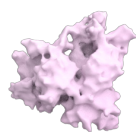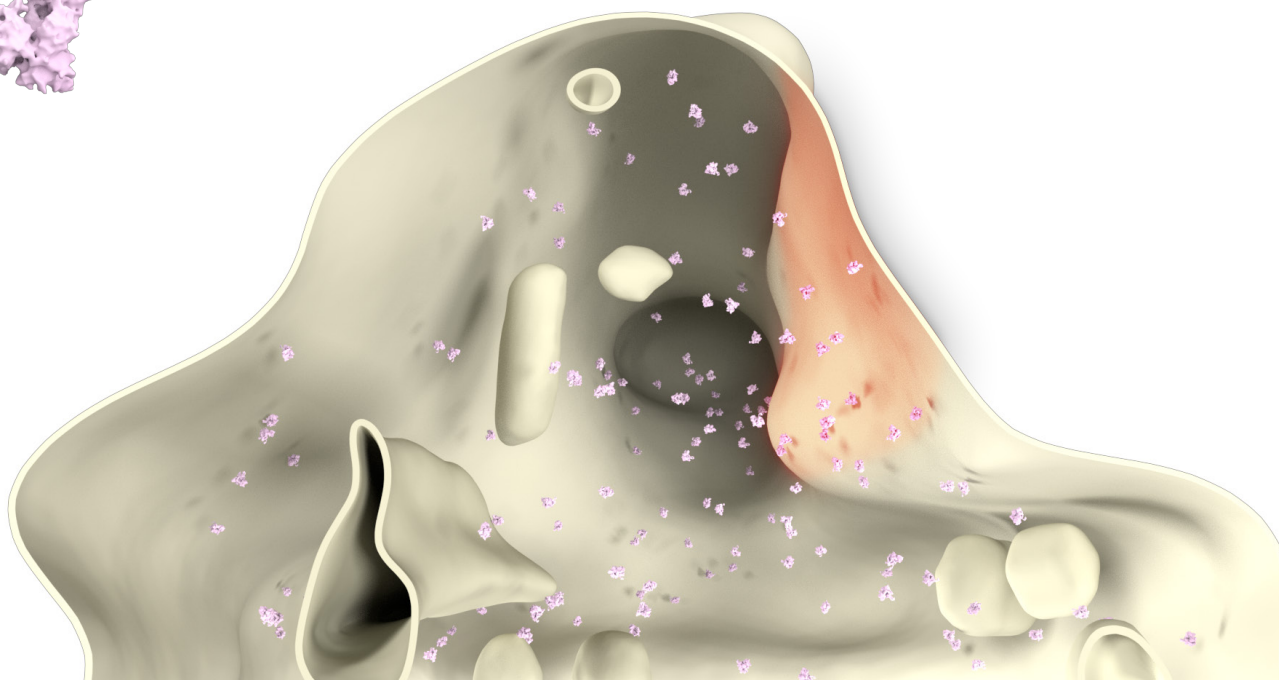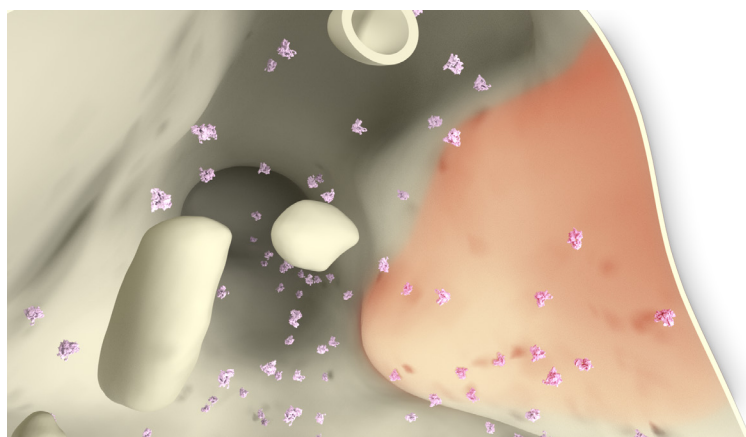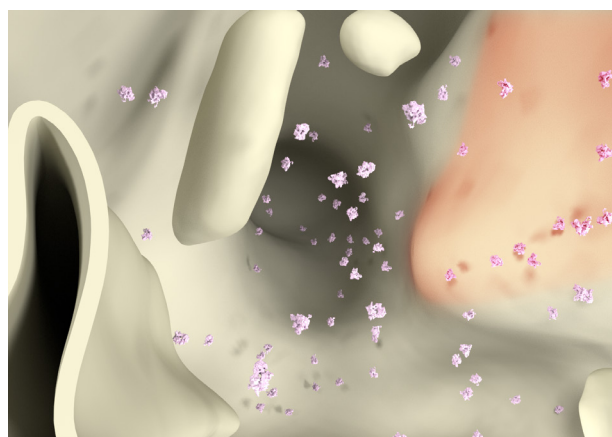

## References

**Antibody:** Abcam ab69797

**PDB Identifier:** Modelled with I-TASSER

### Literature:

Eckenstaler et al., 2016, J. Cell. Sci.

Farina et al., 2015, Elife

Sadakata et al., 2013, J. Neurosci.



Ca<sub>v</sub>1.3 (Gene: Cacna1d, Uniprot ID: P27732)

**Known function:** Calcium channel, Involved in plasticity, scaling and spine morphology.

**Known organization:** Transmembrane protein

**Known Interactions:** Shank1

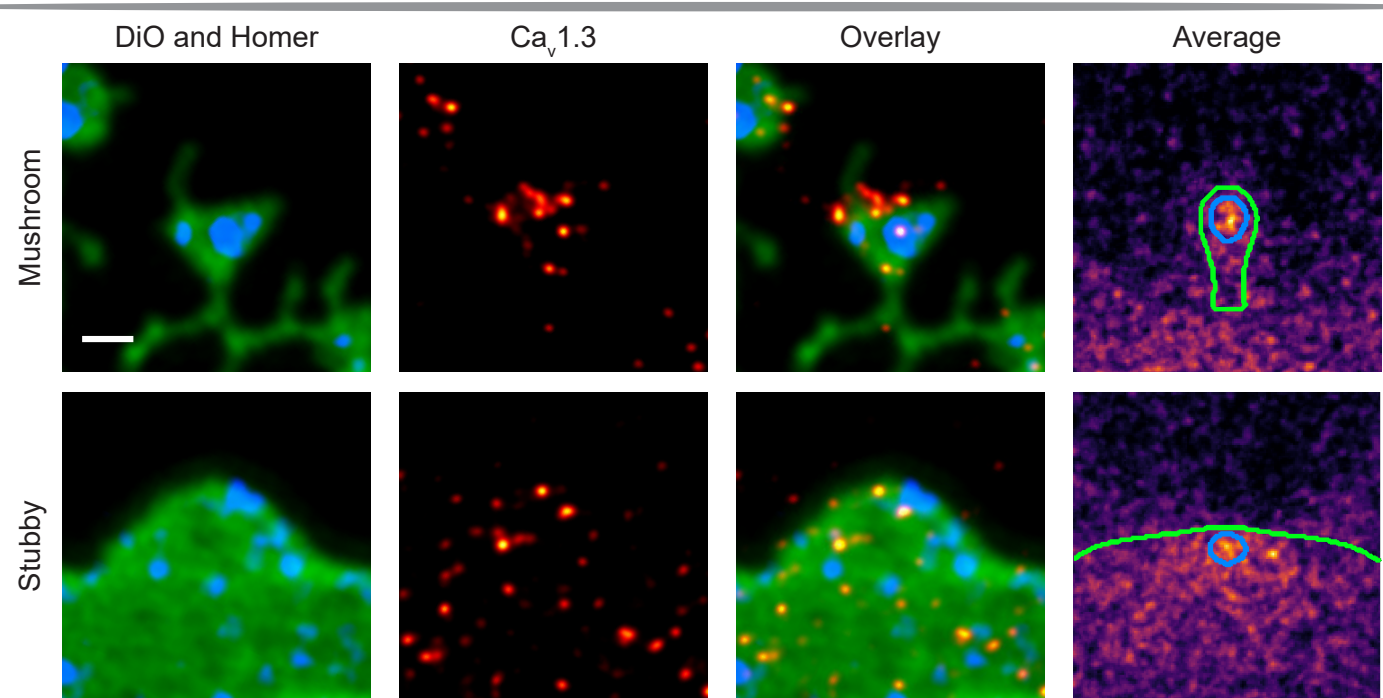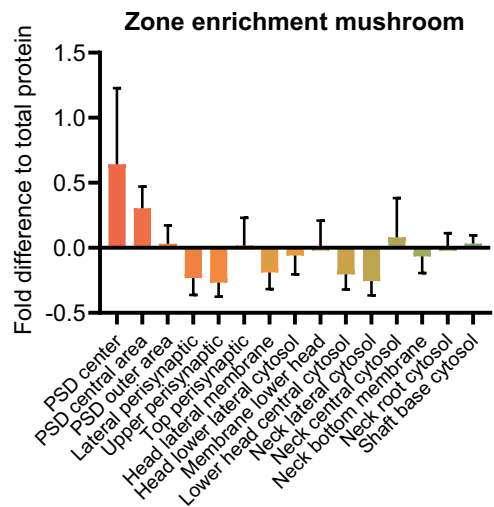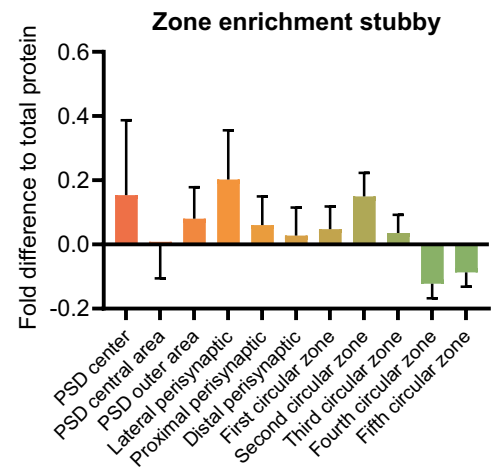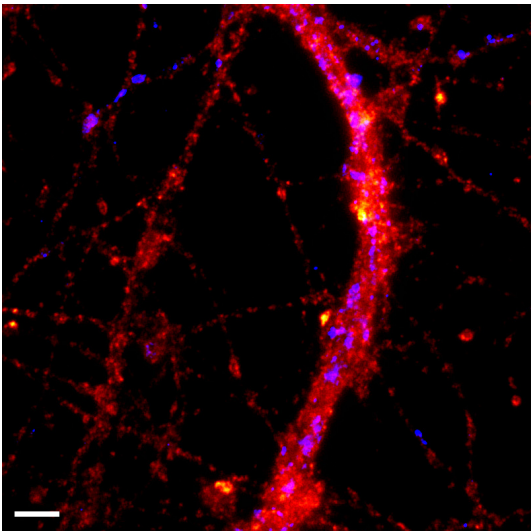

|                        |                |            |
|------------------------|----------------|------------|
| Whole cell copy number | 1623.0 ± 491.1 |            |
| Spine copy number      | 0.5 ± 0.2      |            |
| Function               | Ion Channels   |            |
|                        | Mushroom       | Stubby     |
| Spine copy number      | 0.4 ± 0.1      | 0.6 ± 0.2  |
| % of total protein     | 0.0 ± 0.0%     | 0.0 ± 0.0% |
| Molarity (µM)          | 0.0 ± 0.0      | 0.0 ± 0.0  |
| PSD copy number        | 0 ± 0.0        | 0 ± 0.0    |
| % in PSD               | 0.0 ± 0.0%     | 0.0 ± 0.0% |

|          | Spine copy number | % of total protein | Molarity ( $\mu\text{M}$ ) | PSD copy number |
|----------|-------------------|--------------------|----------------------------|-----------------|
| Mushroom | $0.4 \pm 0.1$     | $0.0 \pm 0.0\%$    | $0.0 \pm 0.0$              | $0 \pm 0.0$     |
| Stubby   | $0.6 \pm 0.2$     | $0.0 \pm 0.0\%$    | $0.0 \pm 0.0$              | $0 \pm 0.0$     |

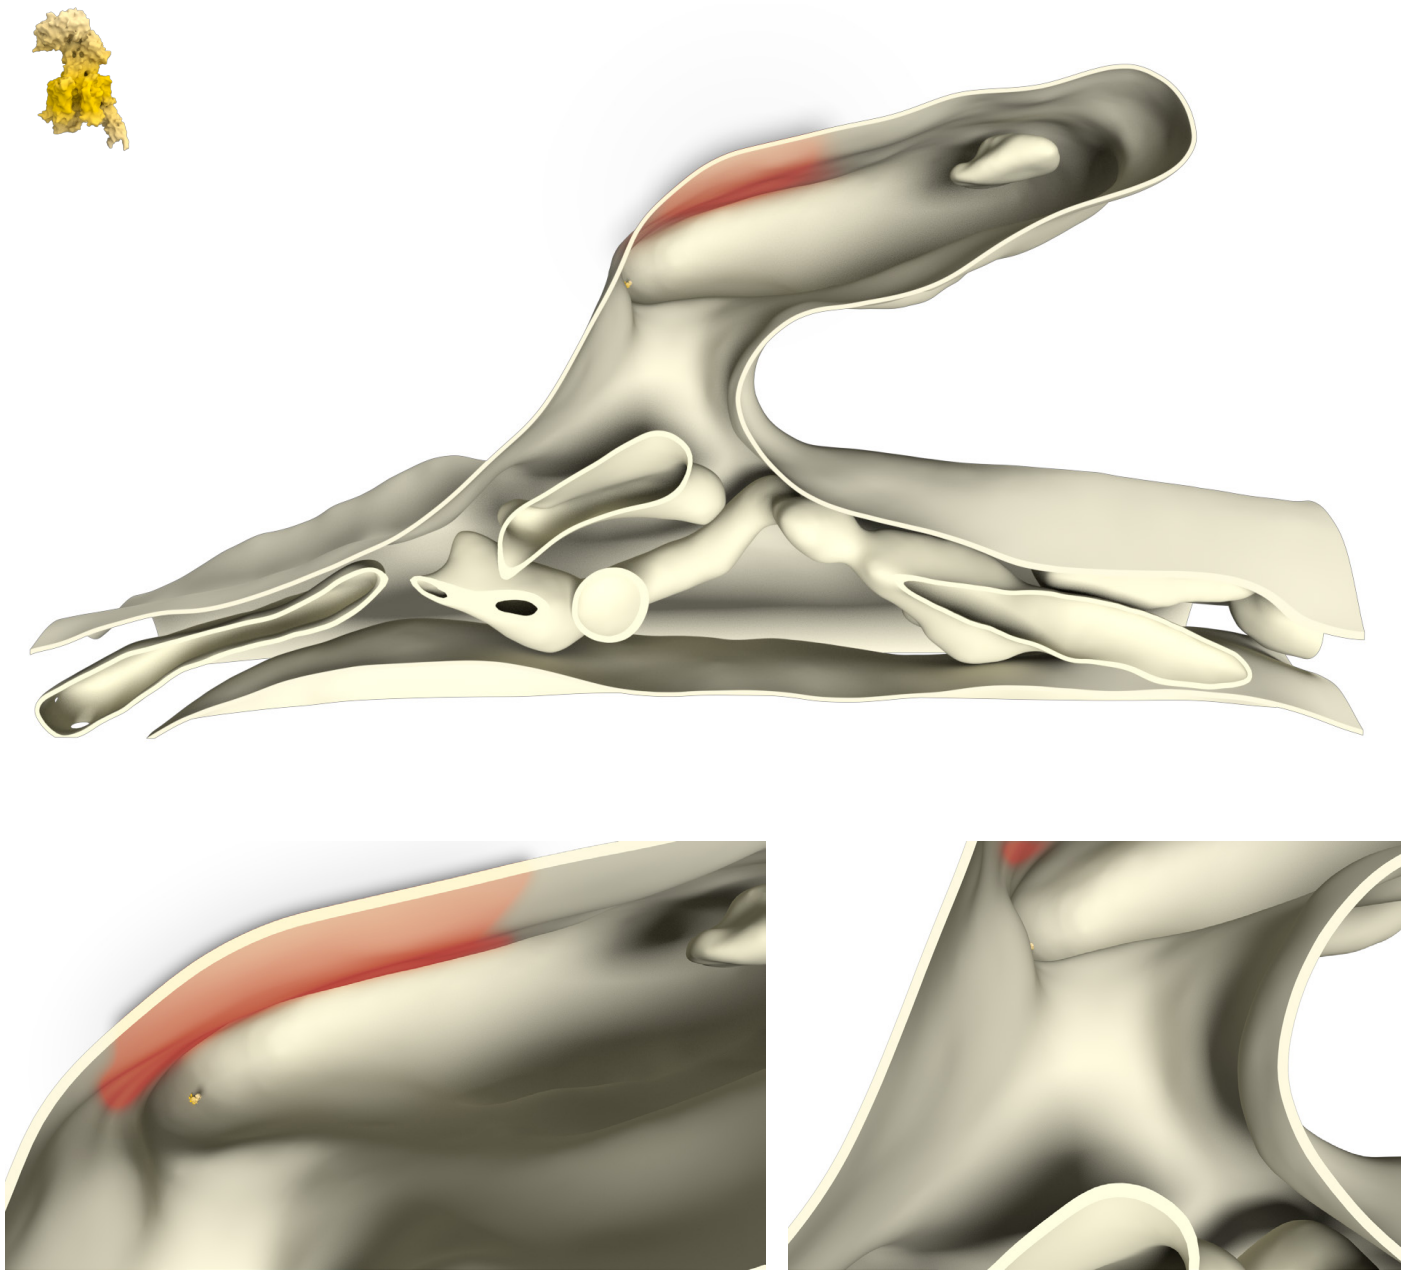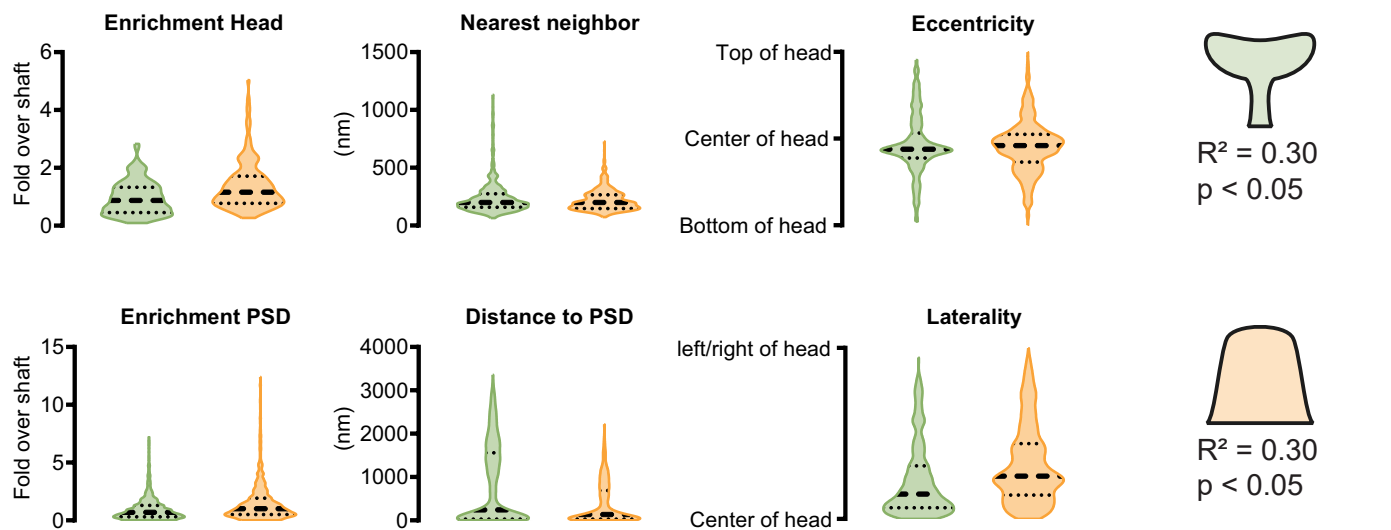

|          | Spine copy number | % of total protein | Molarity ( $\mu\text{M}$ ) | PSD copy number |
|----------|-------------------|--------------------|----------------------------|-----------------|
| Mushroom | $0.4 \pm 0.1$     | $0.0 \pm 0.0\%$    | $0.0 \pm 0.0$              | $0 \pm 0.0$     |
| Stubby   | $0.6 \pm 0.2$     | $0.0 \pm 0.0\%$    | $0.0 \pm 0.0$              | $0 \pm 0.0$     |

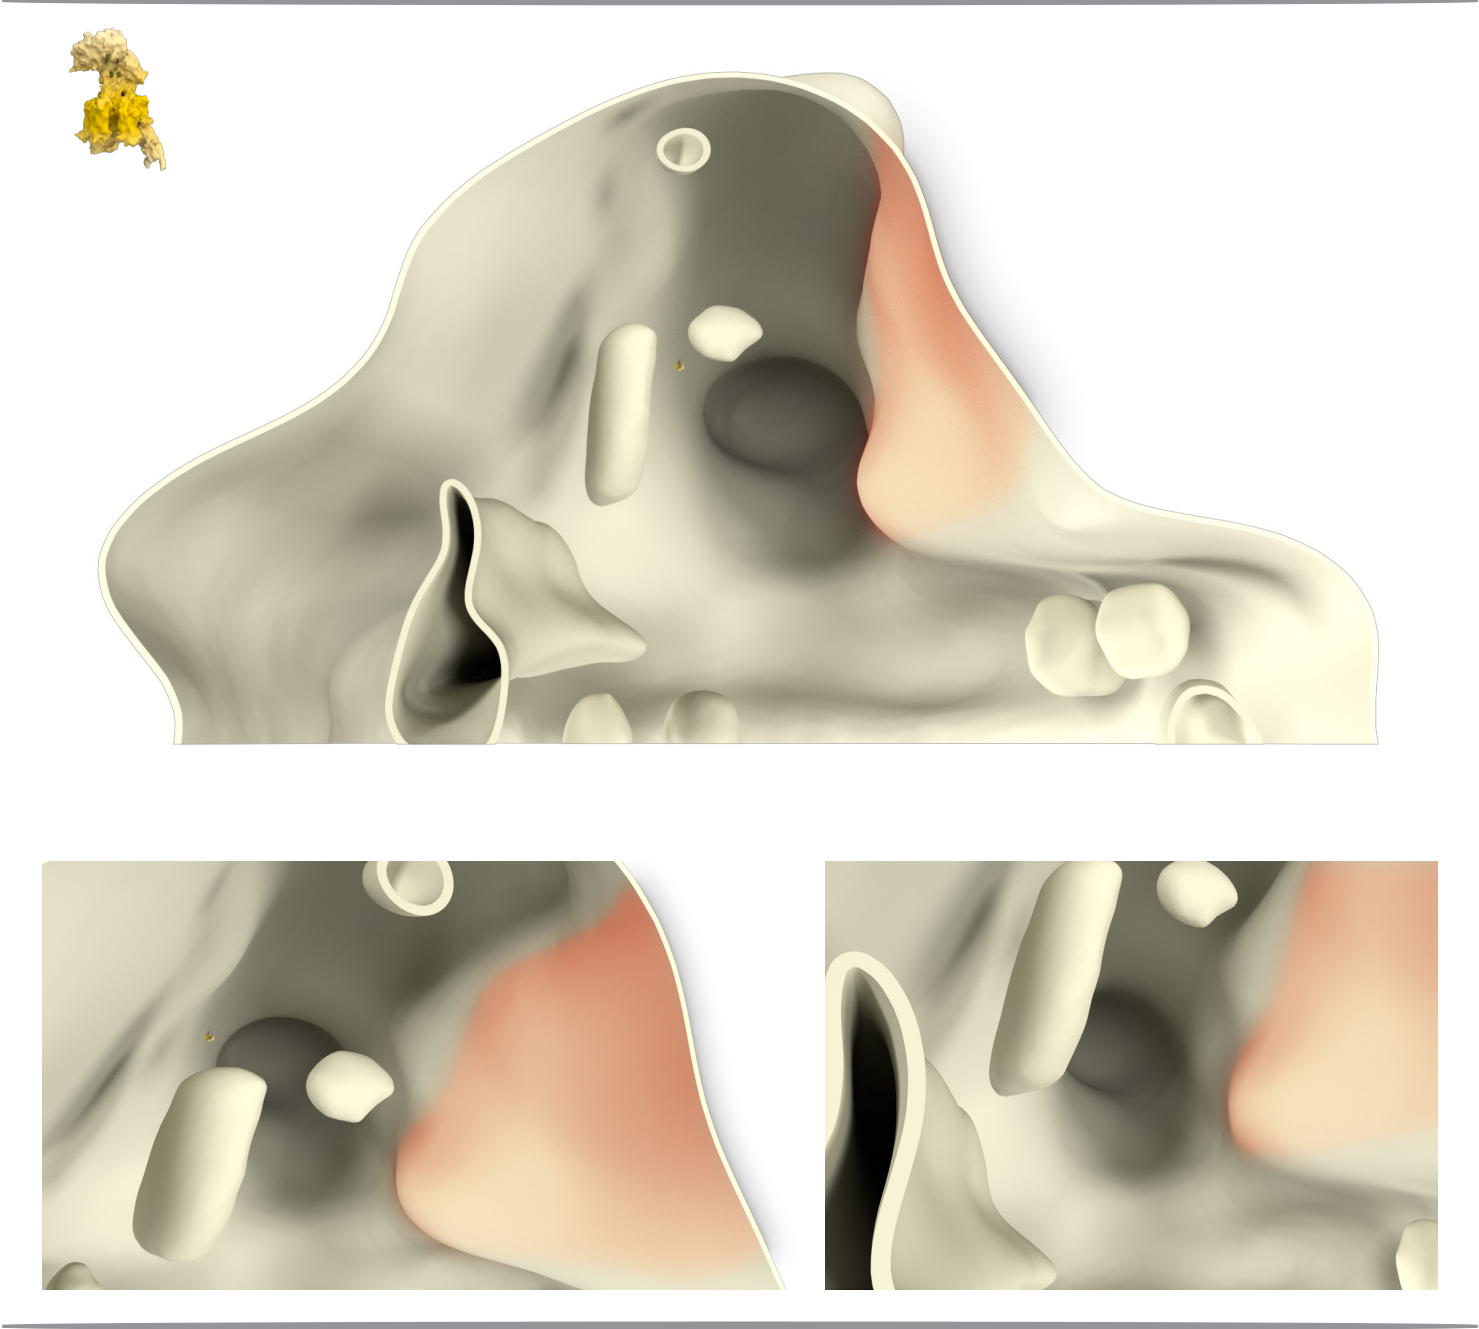

### References

**Antibody:** Alomone labs ACC-311

**PDB Identifier:** 5gjlw

**Literature:**

Greer and Greenberg, 2008, Neuron

Ibata et al., 2008, Neuron

Jenkins et al., 2010, J. Neurosci.

Moosmang et al., 2005, J. Neurosci.

Stanika et al., 2016, Sci. Rep.

Wang et al., 2017, J. Neurosci.

Zhang et al., 2005, J. Neurosci.



**Known Interactions:** CaMKII

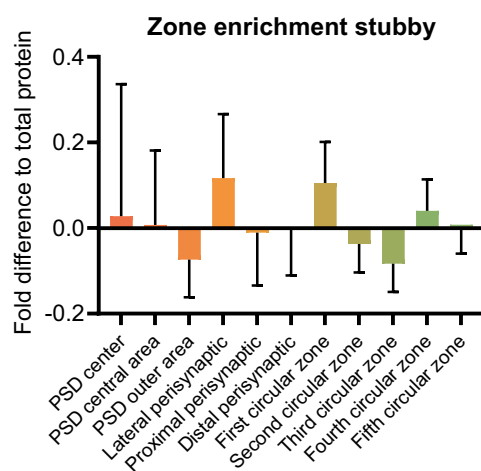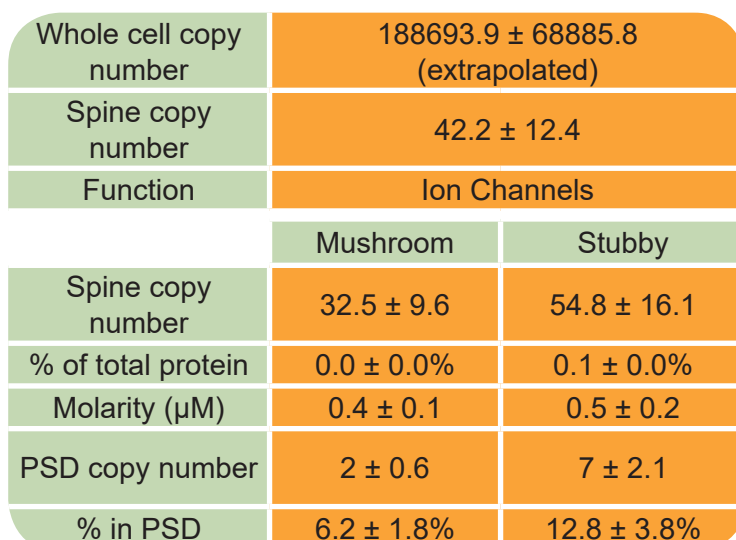

|          | Spine copy number | % of total protein | Molarity ( $\mu\text{M}$ ) | PSD copy number |
|----------|-------------------|--------------------|----------------------------|-----------------|
| Mushroom | $32.5 \pm 9.6$    | $0.0 \pm 0.0\%$    | $0.4 \pm 0.1$              | $2 \pm 0.6$     |
| Stubby   | $54.8 \pm 16.1$   | $0.1 \pm 0.0\%$    | $0.5 \pm 0.2$              | $7 \pm 2.1$     |

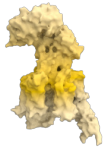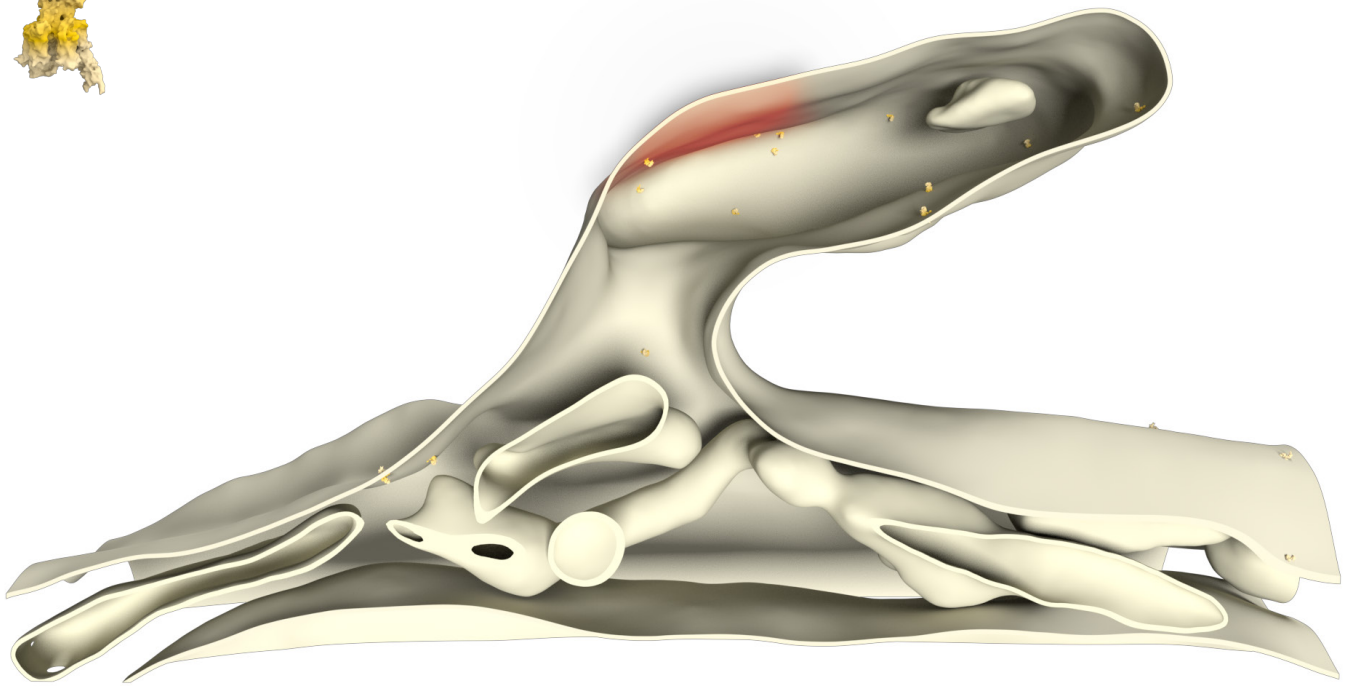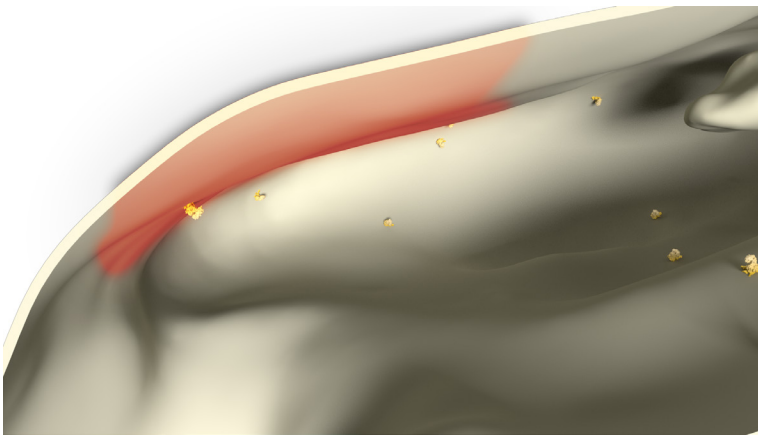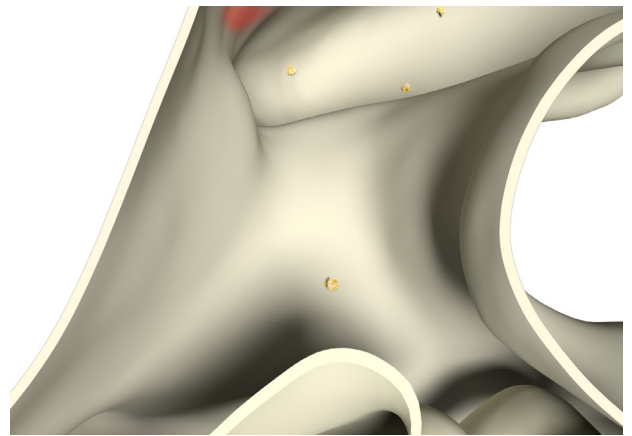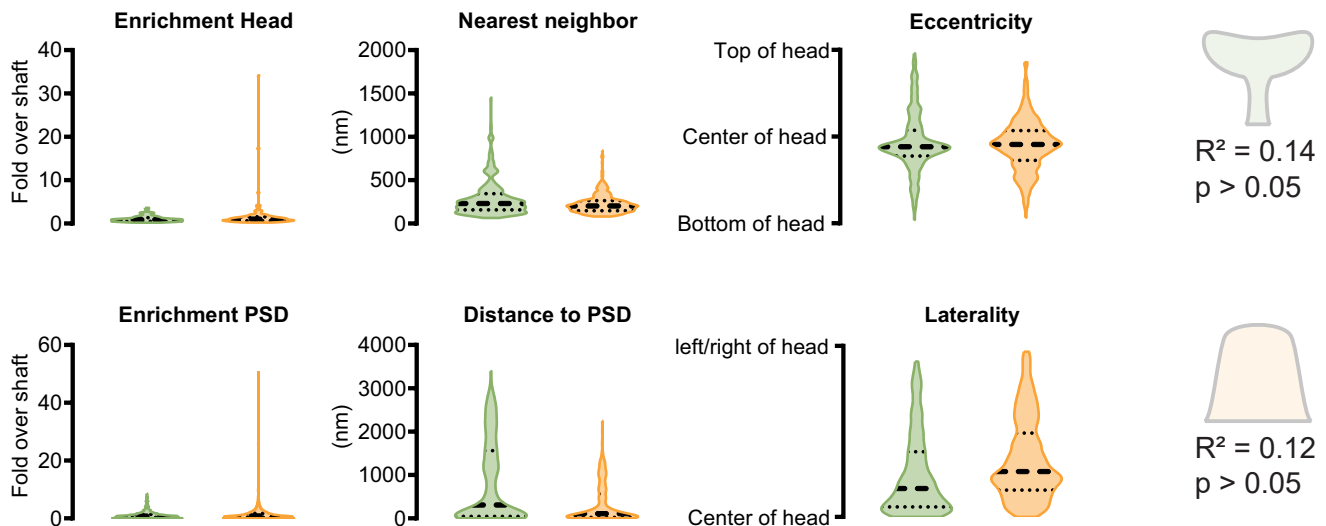

|          | Spine copy number | % of total protein | Molarity ( $\mu\text{M}$ ) | PSD copy number |
|----------|-------------------|--------------------|----------------------------|-----------------|
| Mushroom | $32.5 \pm 9.6$    | $0.0 \pm 0.0\%$    | $0.4 \pm 0.1$              | $2 \pm 0.6$     |
| Stubby   | $54.8 \pm 16.1$   | $0.1 \pm 0.0\%$    | $0.5 \pm 0.2$              | $7 \pm 2.1$     |

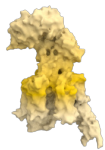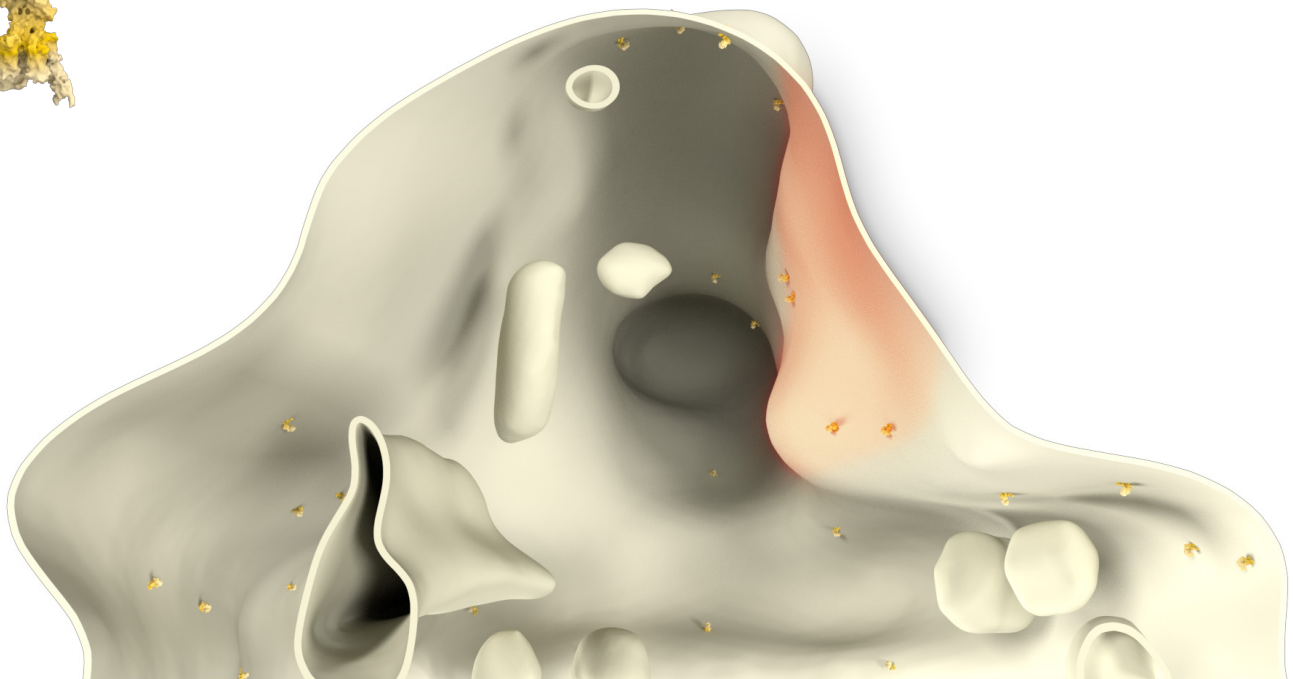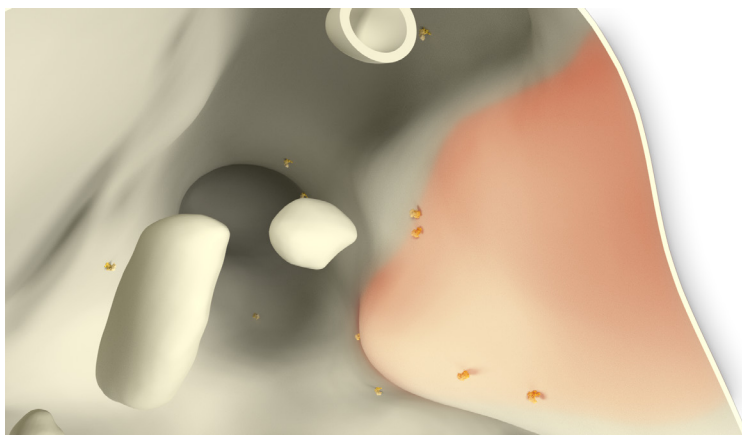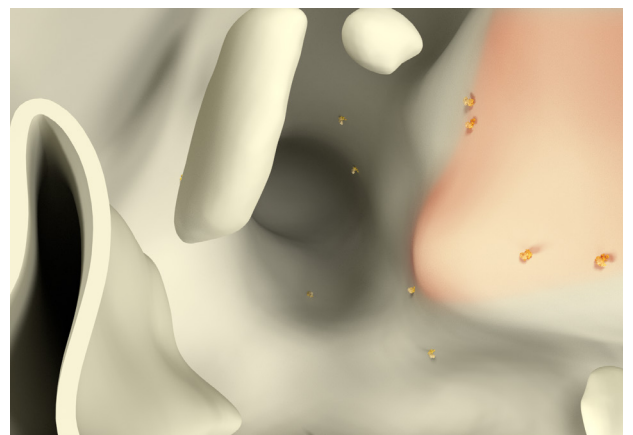

## References

**Antibody:** Synaptic Systems 152 203

**PDB Identifier:** modified Cav1.3

### Literature:

Jiang et al., 2008,, Proc. Natl. Acad. Sci. U S A

Magupalli et al., 2013, J. Biol. Chem.

Nanou et al., 2016, Proc. Natl. Acad. Sci. U S A

Westenbroek et al., 1995, J. Neurosci.

Wu et al., 1999, J. Neurosci.



## CDC42 (Gene: Cdc42, Uniprot ID: Q8CFN2)

**Known function:** Rho type GTPase, Regulates actin cytoskeleton

**Known organization:** Cytosolic

**Known Interactions:** CaMKII, Homer2

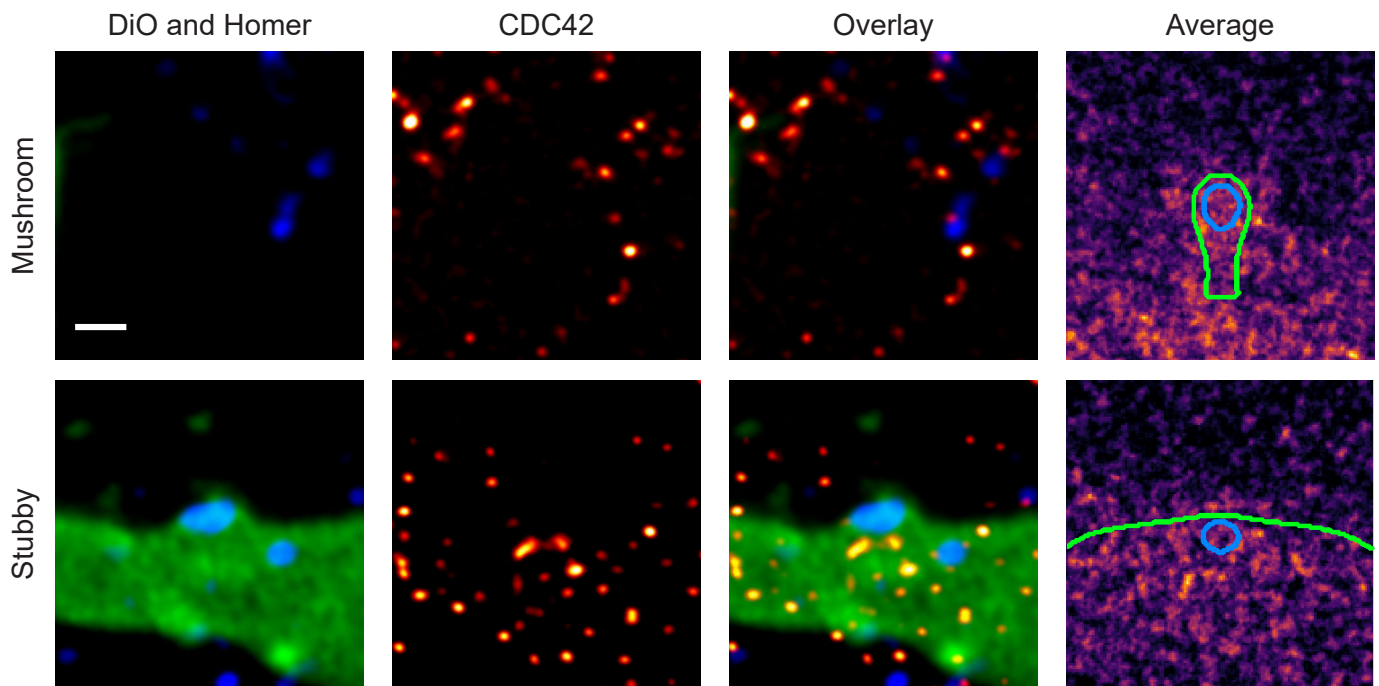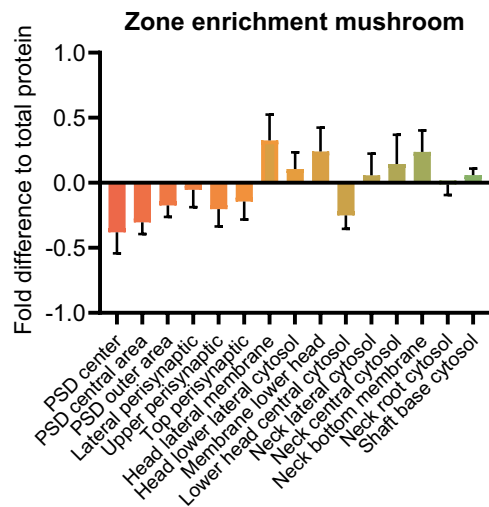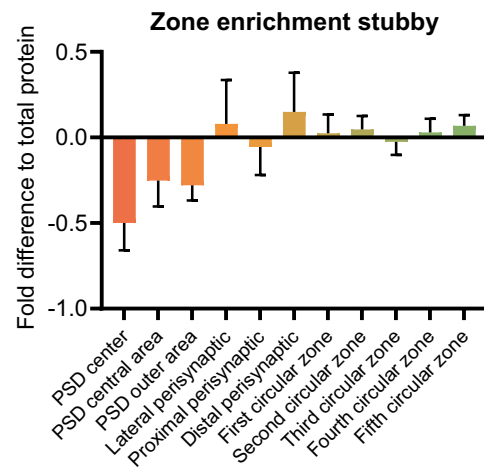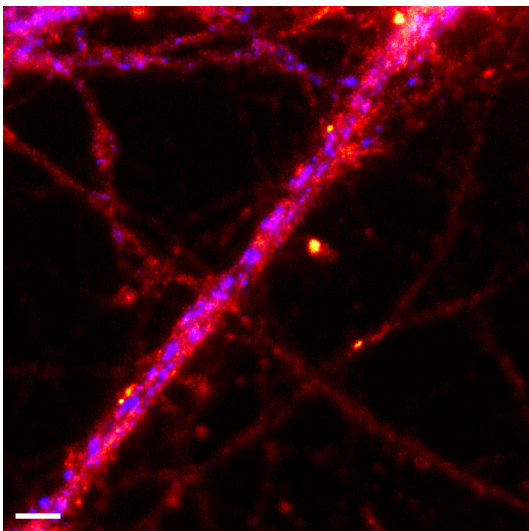

|                        |                        |                 |
|------------------------|------------------------|-----------------|
| Whole cell copy number | 19193307.9 ± 1363601.0 |                 |
| Spine copy number      | 897.0 ± 877.5          |                 |
| Function               | Signaling              |                 |
|                        | Mushroom               | Stubby          |
| Spine copy number      | 727.6 ± 711.8          | 1139.6 ± 1114.8 |
| % of total protein     | 0.1 ± 0.1%             | 0.1 ± 0.1%      |
| Molarity (μM)          | 9.2 ± 9.0              | 10.8 ± 10.5     |
| PSD copy number        | 75 ± 73.4              | 67 ± 65.5       |
| % in PSD               | 10.3 ± 10.1%           | 5.9 ± 5.8%      |

|          | Spine copy number   | % of total protein | Molarity ( $\mu\text{M}$ ) | PSD copy number |
|----------|---------------------|--------------------|----------------------------|-----------------|
| Mushroom | $727.6 \pm 711.8$   | $0.1 \pm 0.1\%$    | $9.2 \pm 9.0$              | $75 \pm 73.4$   |
| Stubby   | $1139.6 \pm 1114.8$ | $0.1 \pm 0.1\%$    | $10.8 \pm 10.5$            | $67 \pm 65.5$   |

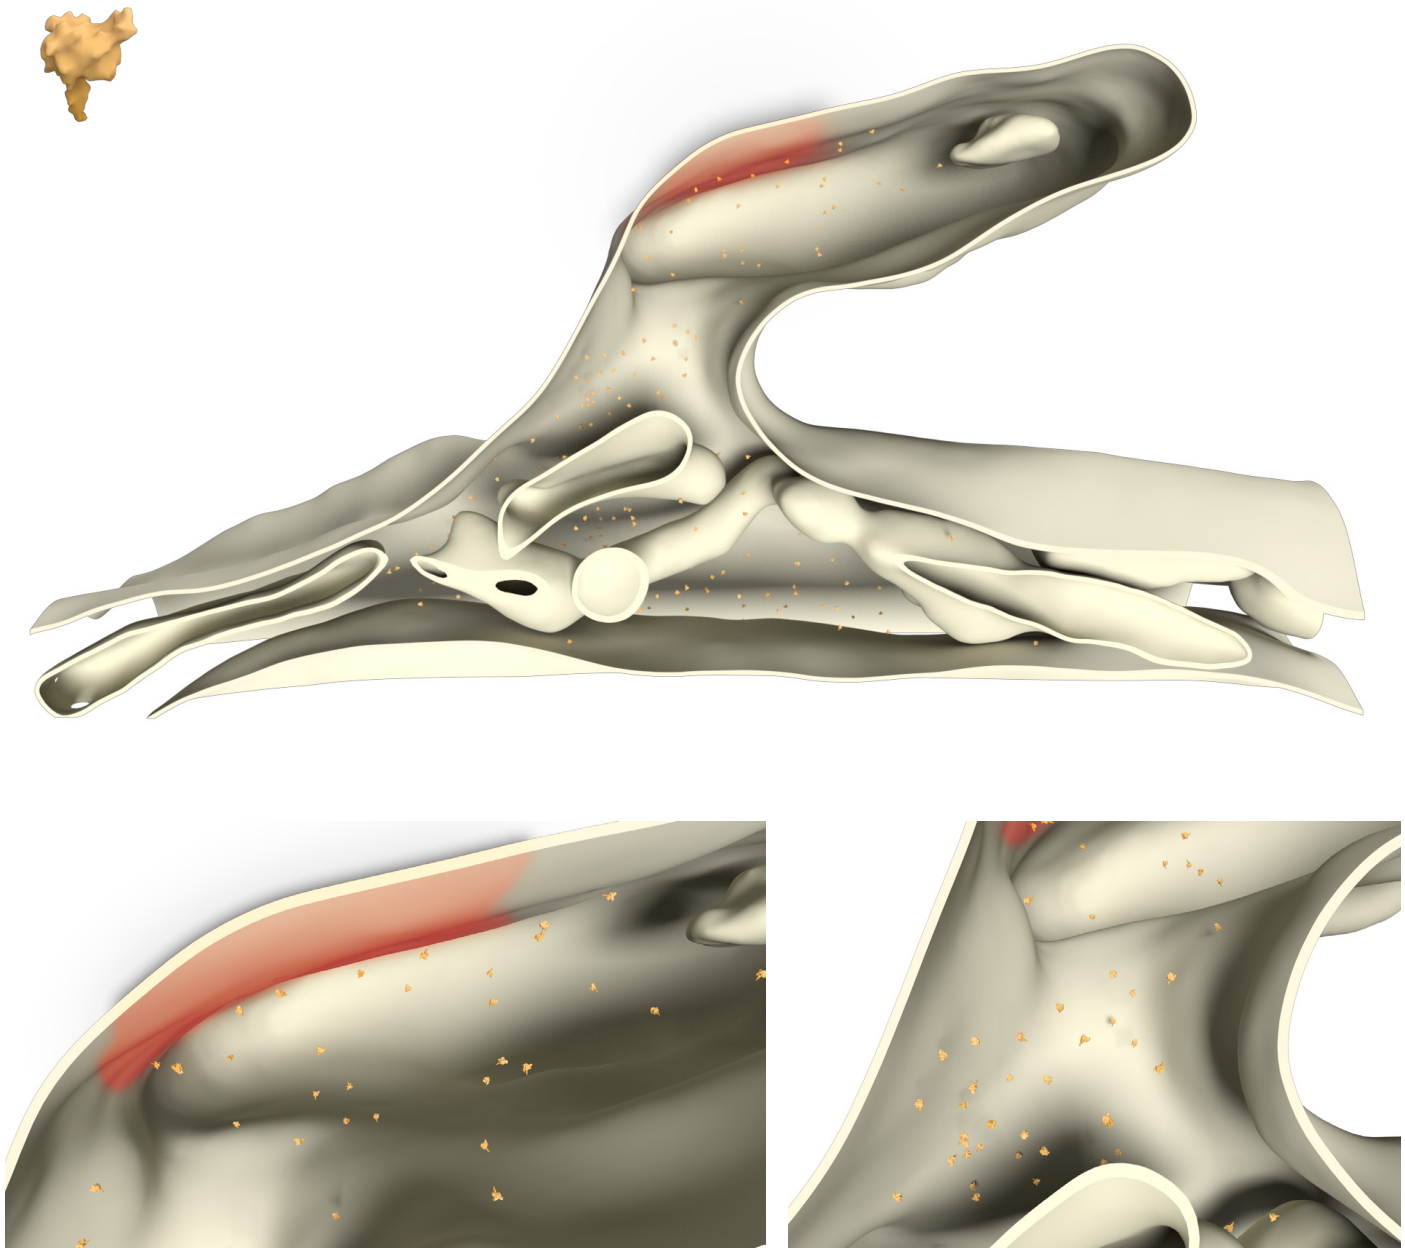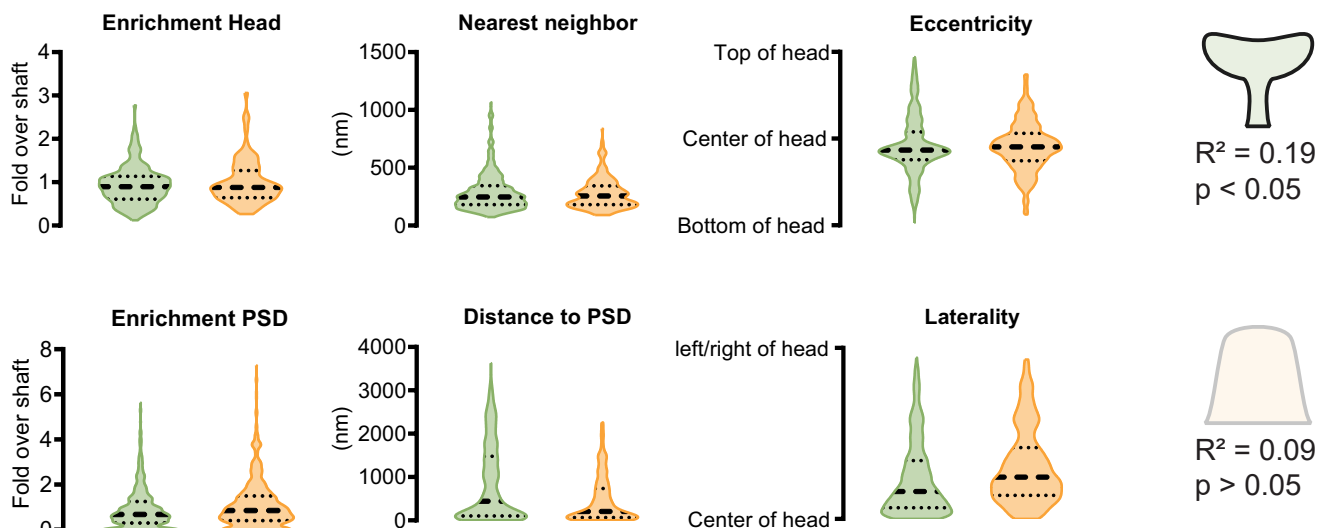

|          | Spine copy number   | % of total protein | Molarity ( $\mu\text{M}$ ) | PSD copy number |
|----------|---------------------|--------------------|----------------------------|-----------------|
| Mushroom | $727.6 \pm 711.8$   | $0.1 \pm 0.1\%$    | $9.2 \pm 9.0$              | $75 \pm 73.4$   |
| Stubby   | $1139.6 \pm 1114.8$ | $0.1 \pm 0.1\%$    | $10.8 \pm 10.5$            | $67 \pm 65.5$   |

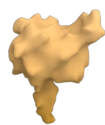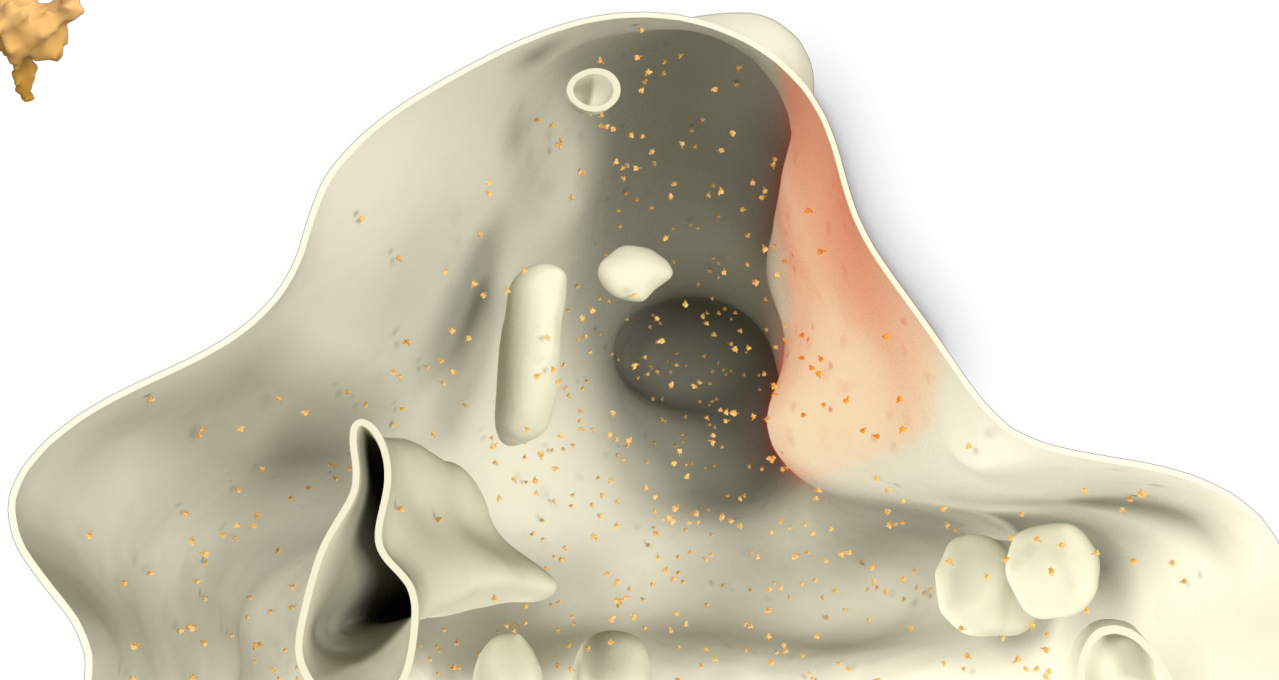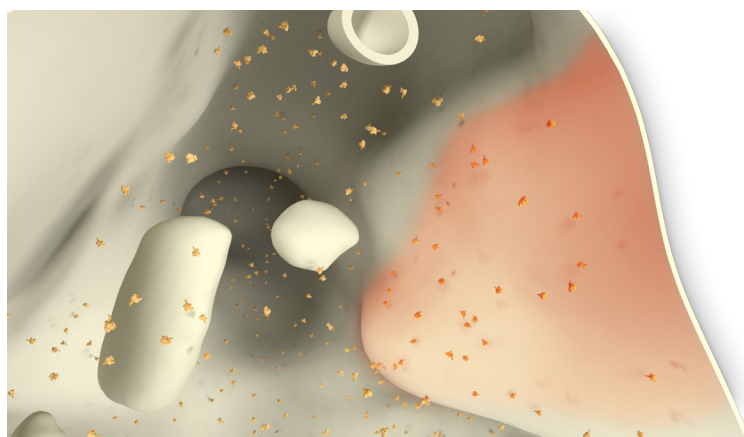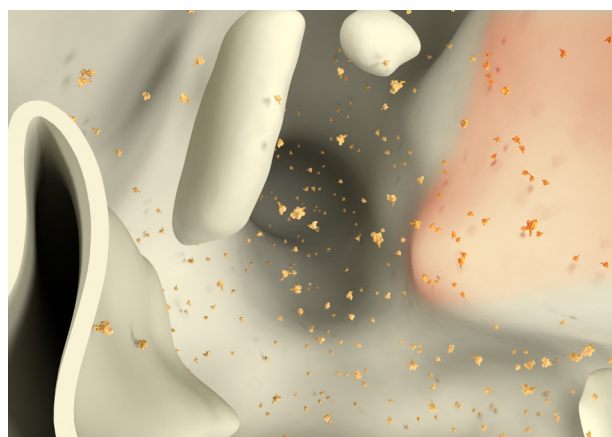

## References

**Antibody:** Thermo Scientific PA1-092

**PDB Identifier:** 1ki1

### Literature:

Choi et al., 2005, J. Neurosci.

Murakoshi et al., 2011, Nature

Shiraishi-Yamaguchi et al., 2009, BMC Neurosci.



# Chromogranin A (Beta-granin, Gene: Chga, Uniprot ID: P10354)

**Known function:** Acts as pro-hormone, Involved in LDCV biogenesis

**Known organization:** In LDCV lumen

**Known Interactions:** Chromogranin B

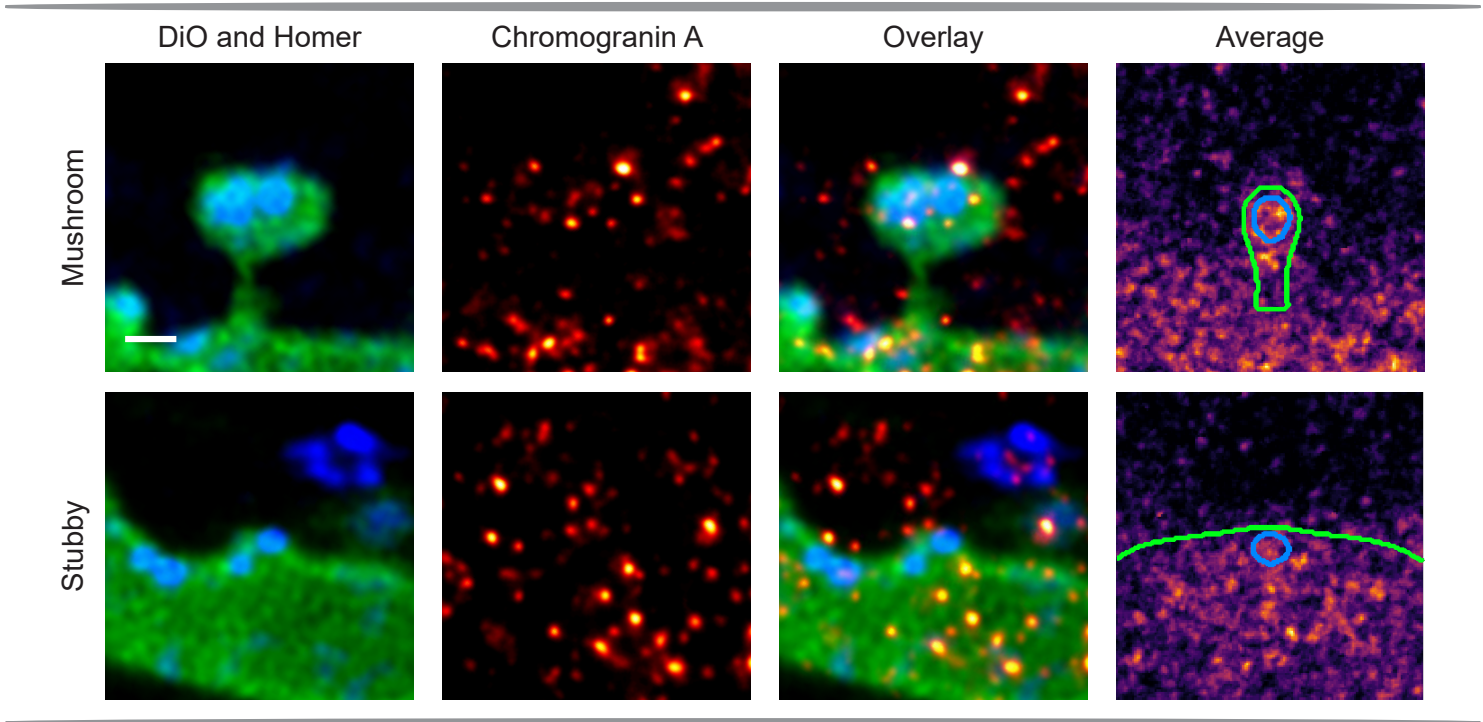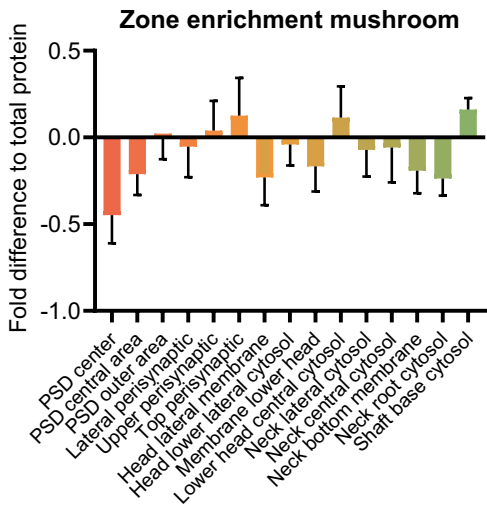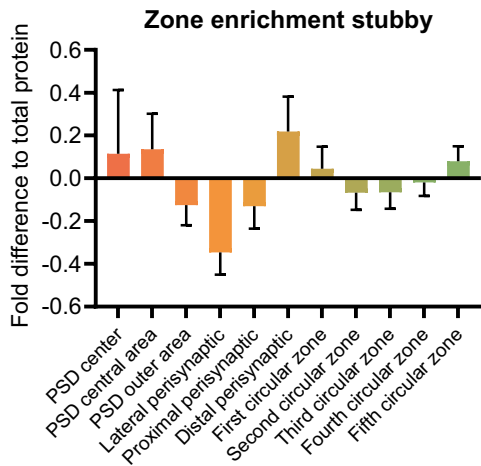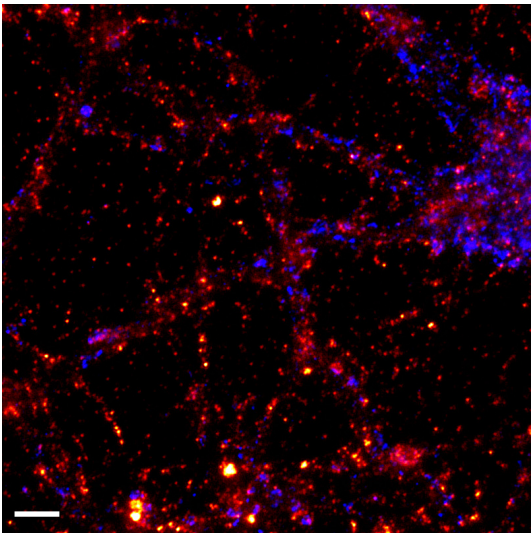

|                        |                  |            |
|------------------------|------------------|------------|
| Whole cell copy number | 23006.7 ± 5194.7 |            |
| Spine copy number      | 3.6 ± 1.2        |            |
| Function               | Signaling        |            |
|                        | Mushroom         | Stubby     |
| Spine copy number      | 3.3 ± 1.1        | 4.1 ± 1.4  |
| % of total protein     | 0.0 ± 0.0%       | 0.0 ± 0.0% |
| Molarity (µM)          | 0.0 ± 0.0        | 0.0 ± 0.0  |
| PSD copy number        | 0 ± 0.0          | 0 ± 0.0    |
| % in PSD               | 0.0 ± 0.0%       | 0.0 ± 0.0% |

|          | Spine copy number | % of total protein | Molarity ( $\mu\text{M}$ ) | PSD copy number |
|----------|-------------------|--------------------|----------------------------|-----------------|
| Mushroom | $3.3 \pm 1.1$     | $0.0 \pm 0.0\%$    | $0.0 \pm 0.0$              | $0 \pm 0.0$     |
| Stubby   | $4.1 \pm 1.4$     | $0.0 \pm 0.0\%$    | $0.0 \pm 0.0$              | $0 \pm 0.0$     |

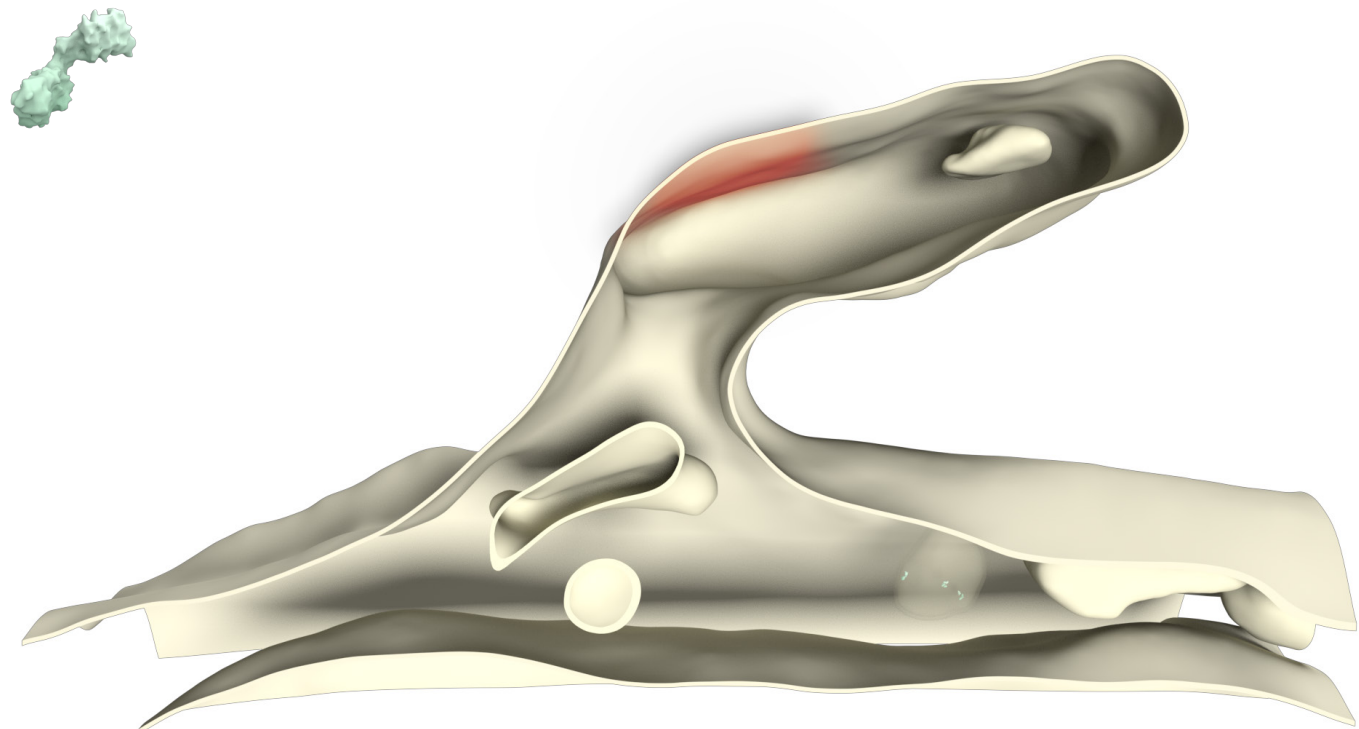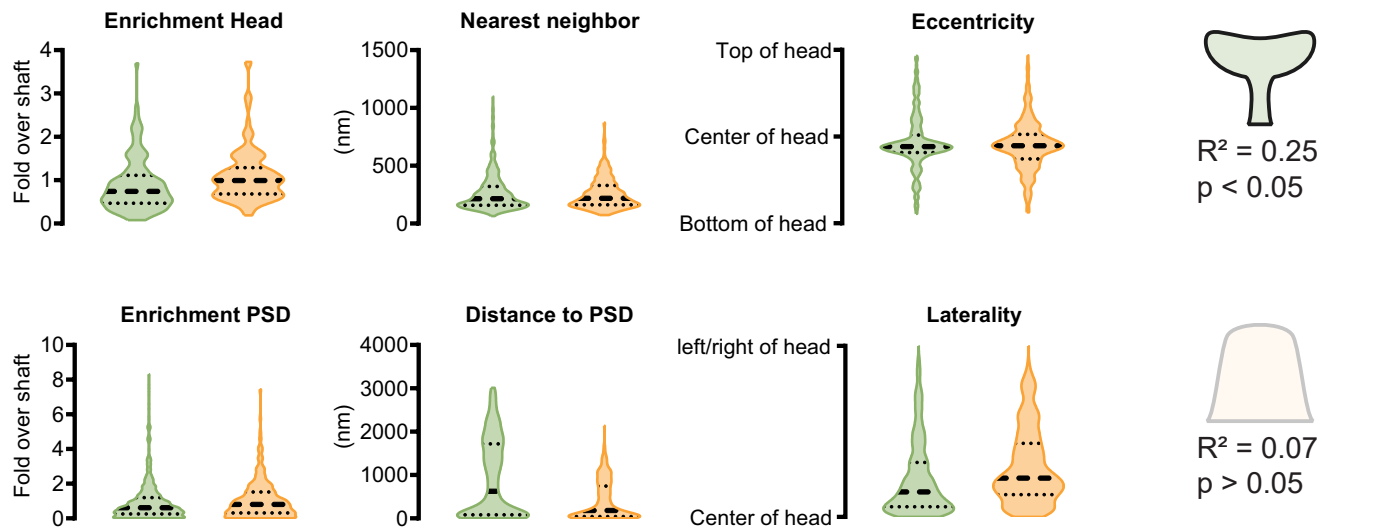

|          | Spine copy number | % of total protein | Molarity ( $\mu\text{M}$ ) | PSD copy number |
|----------|-------------------|--------------------|----------------------------|-----------------|
| Mushroom | $3.3 \pm 1.1$     | $0.0 \pm 0.0\%$    | $0.0 \pm 0.0$              | $0 \pm 0.0$     |
| Stubby   | $4.1 \pm 1.4$     | $0.0 \pm 0.0\%$    | $0.0 \pm 0.0$              | $0 \pm 0.0$     |

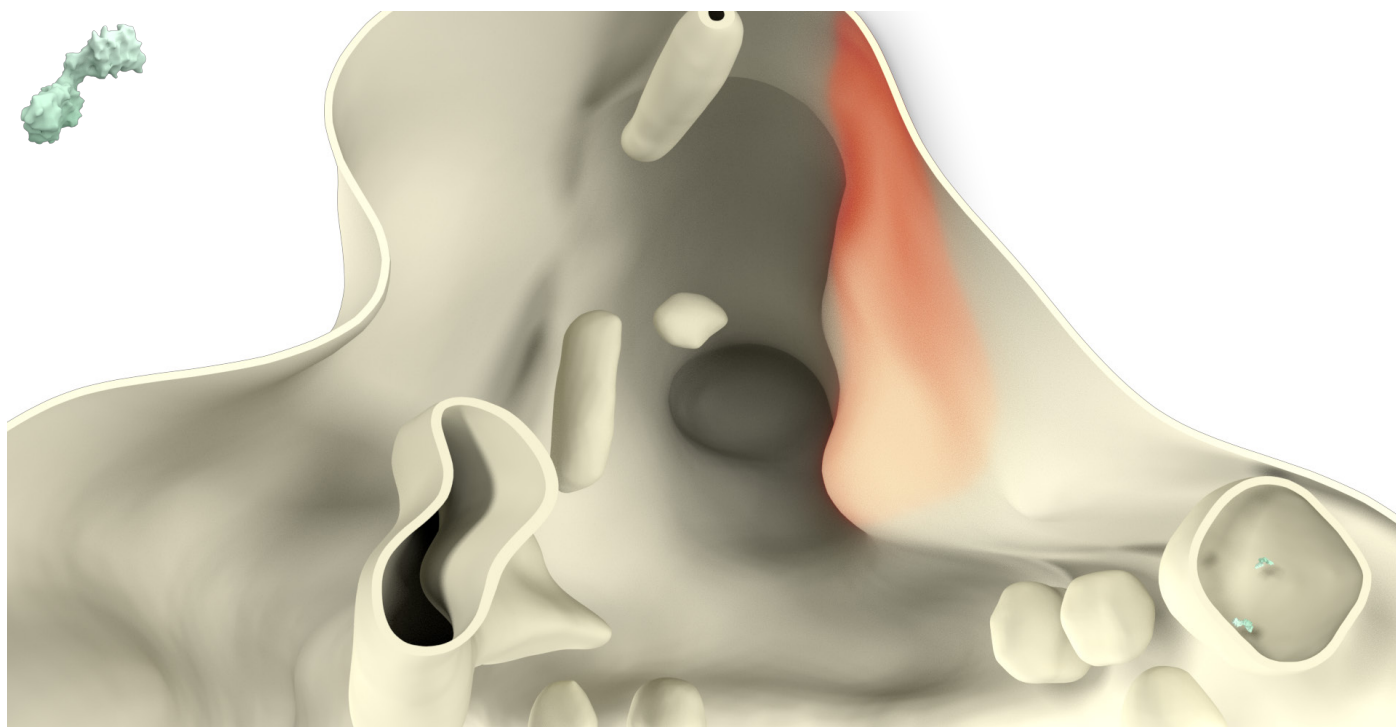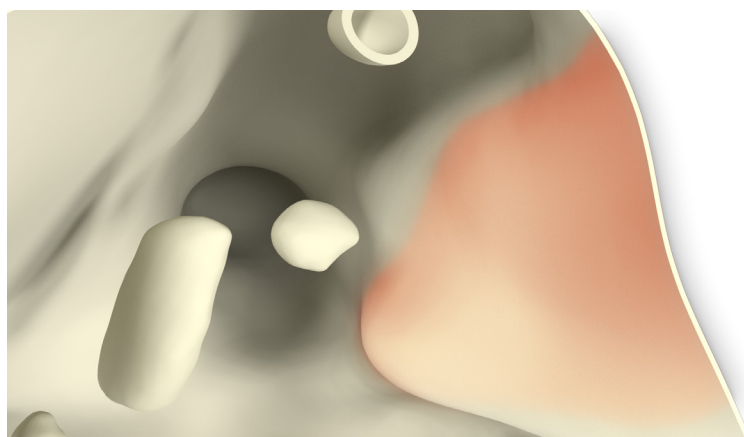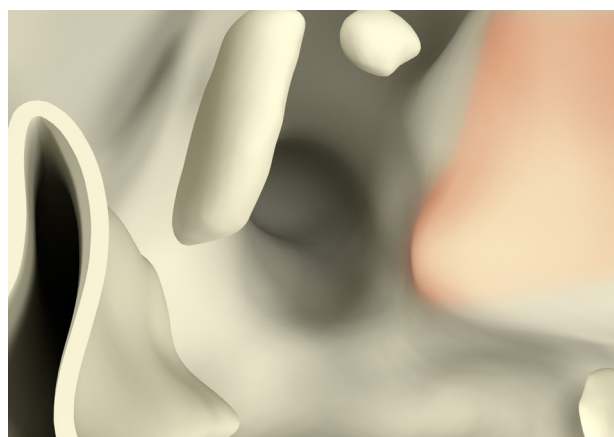

## References

**Antibody:** Synaptic Systems 259 003

**PDB Identifier:** Modelled with I-TASSER

### Literature:

Krömer et al., 1998, J. Cell. Biol.

Montero-Hadjadje et al., 2009, J. Biol. Chem.

Natori and Huttner, 1996, Proc. Natl. Acad. Sci. USA

Sun et al., 2013, Traffic



Chromogranin B (Secretogranin I, Gene: Chgb, Uniprot ID: O35314)

Known function: Acts as pro-hormone, Involved in LDCV biogenesis

Known organization: In LDCV lumen

Known Interactions: Chromogranin A

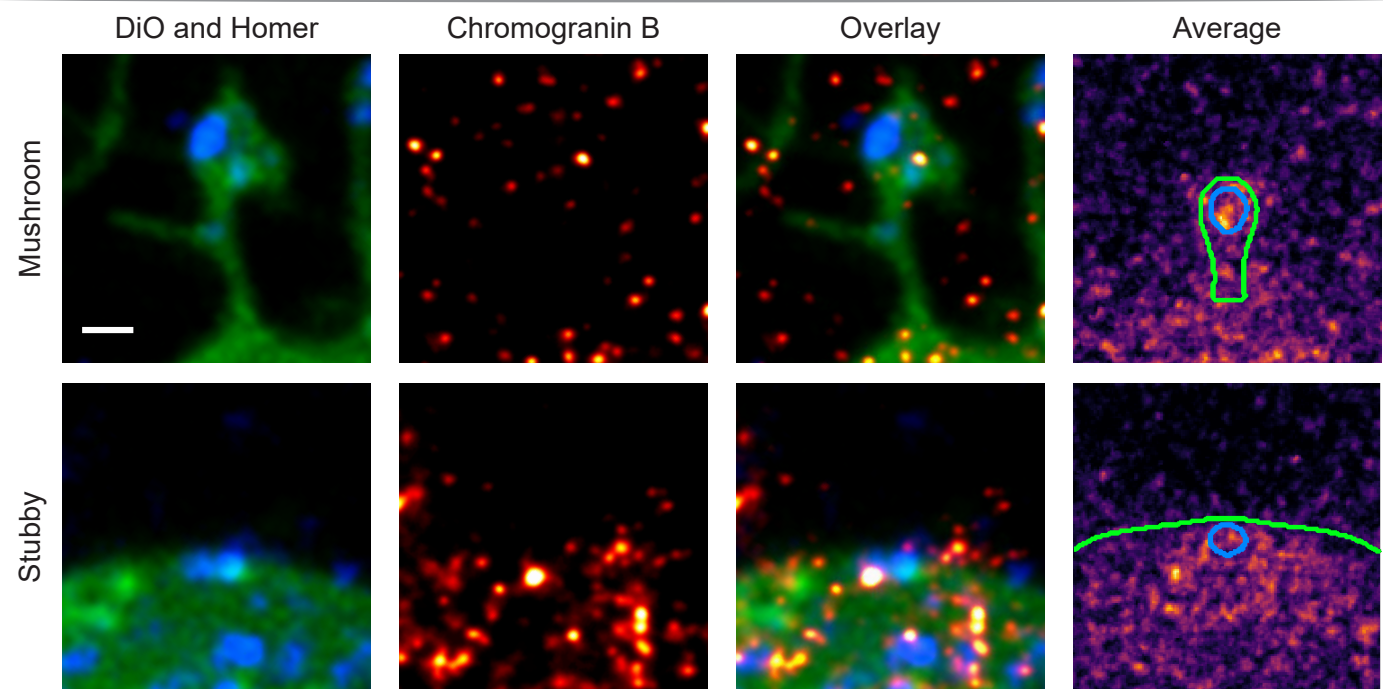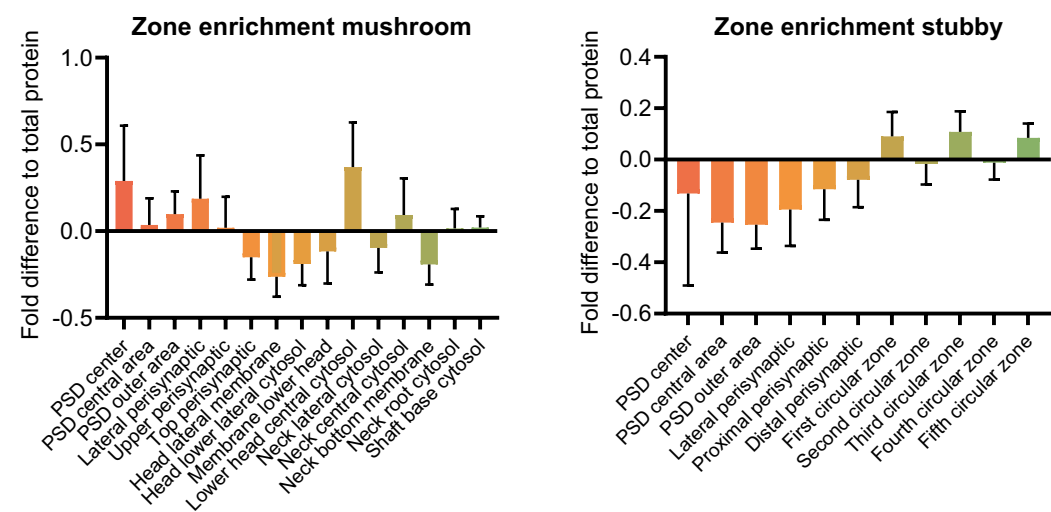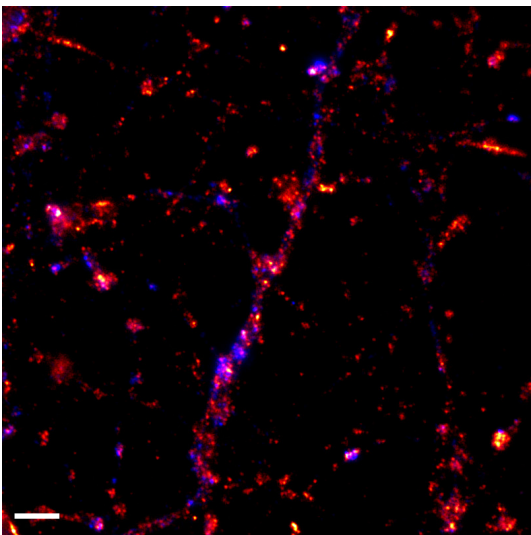

|                        |                    |            |
|------------------------|--------------------|------------|
| Whole cell copy number | 137429.7 ± 19202.2 |            |
| Spine copy number      | 28.1 ± 7.0         |            |
| Function               | Signaling          |            |
|                        | Mushroom           | Stubby     |
| Spine copy number      | 28.3 ± 7.0         | 31.4 ± 7.8 |
| % of total protein     | 0.0 ± 0.0%         | 0.0 ± 0.0% |
| Molarity (µM)          | 0.4 ± 0.1          | 0.3 ± 0.1  |
| PSD copy number        | 0 ± 0.0            | 0 ± 0.0    |
| % in PSD               | 0.0 ± 0.0%         | 0.0 ± 0.0% |

|          | Spine copy number | % of total protein | Molarity ( $\mu\text{M}$ ) | PSD copy number |
|----------|-------------------|--------------------|----------------------------|-----------------|
| Mushroom | $28.3 \pm 7.0$    | $0.0 \pm 0.0\%$    | $0.4 \pm 0.1$              | $0 \pm 0.0$     |
| Stubby   | $31.4 \pm 7.8$    | $0.0 \pm 0.0\%$    | $0.3 \pm 0.1$              | $0 \pm 0.0$     |

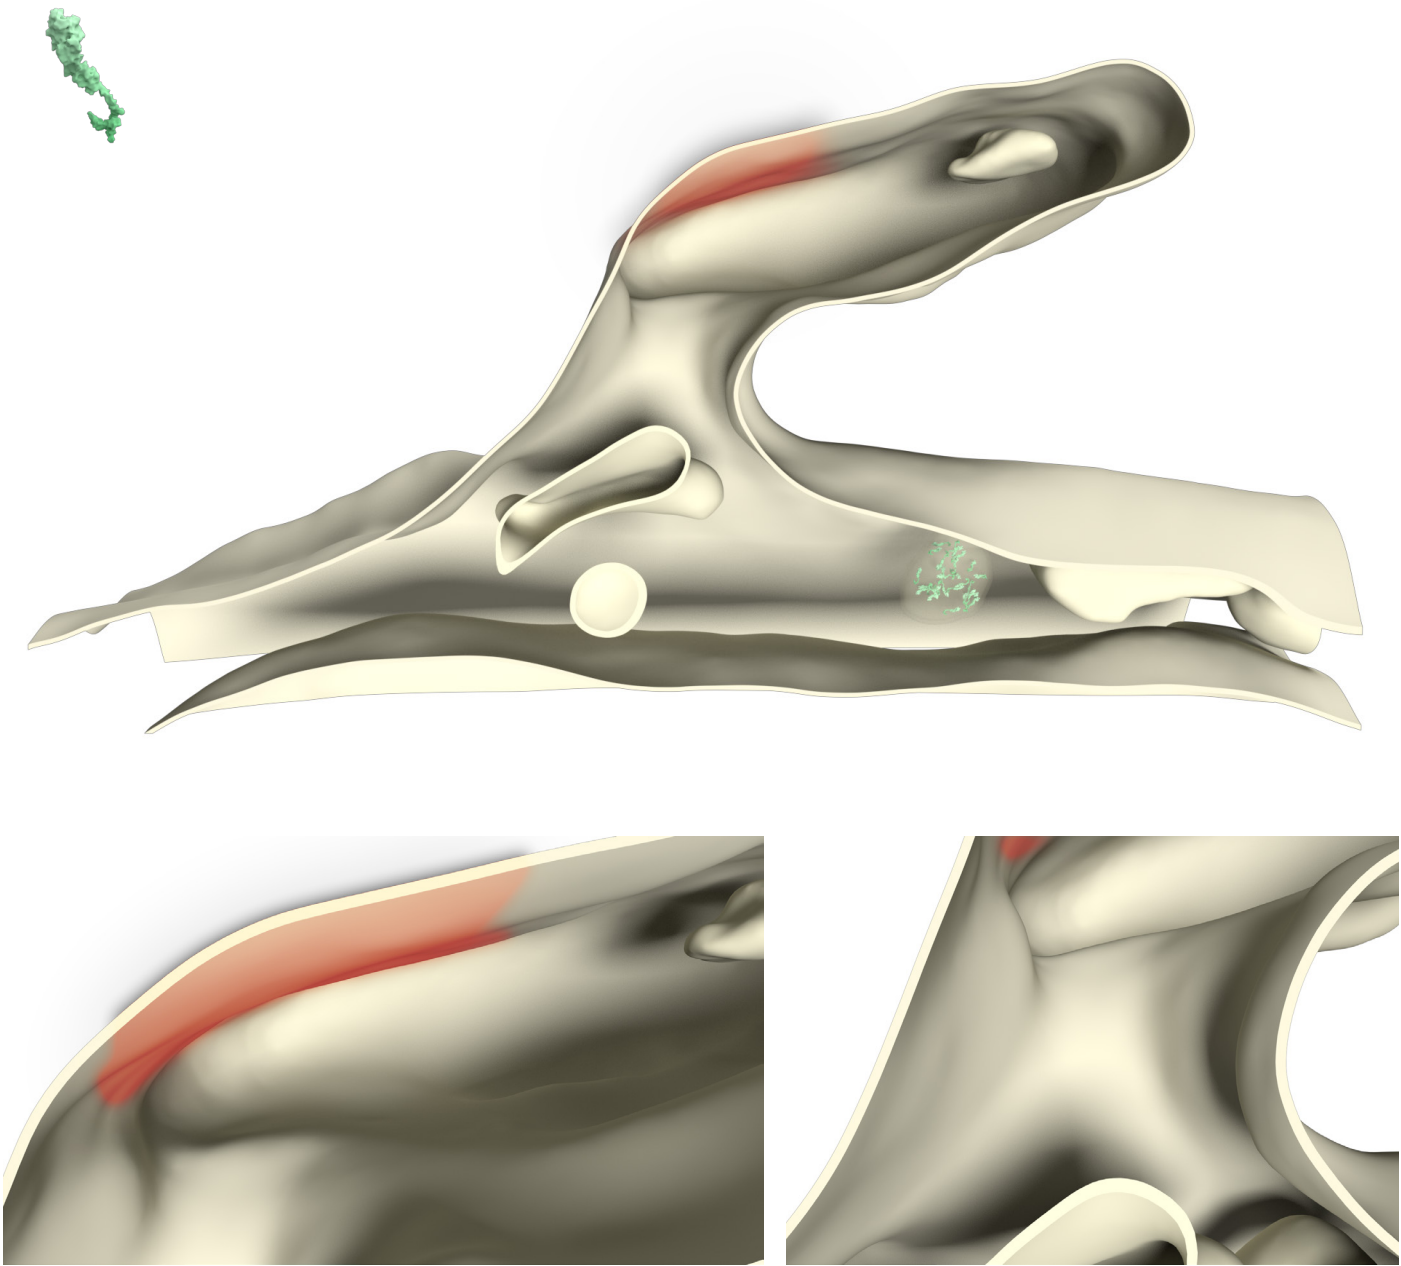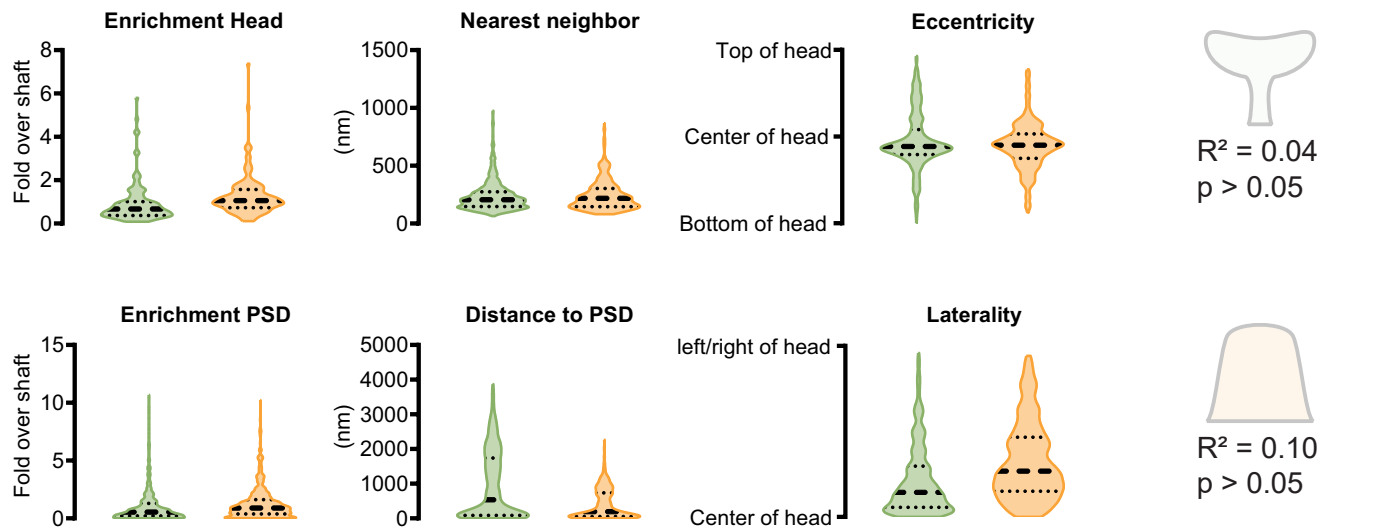

|          | Spine copy number | % of total protein | Molarity ( $\mu\text{M}$ ) | PSD copy number |
|----------|-------------------|--------------------|----------------------------|-----------------|
| Mushroom | $28.3 \pm 7.0$    | $0.0 \pm 0.0\%$    | $0.4 \pm 0.1$              | $0 \pm 0.0$     |
| Stubby   | $31.4 \pm 7.8$    | $0.0 \pm 0.0\%$    | $0.3 \pm 0.1$              | $0 \pm 0.0$     |

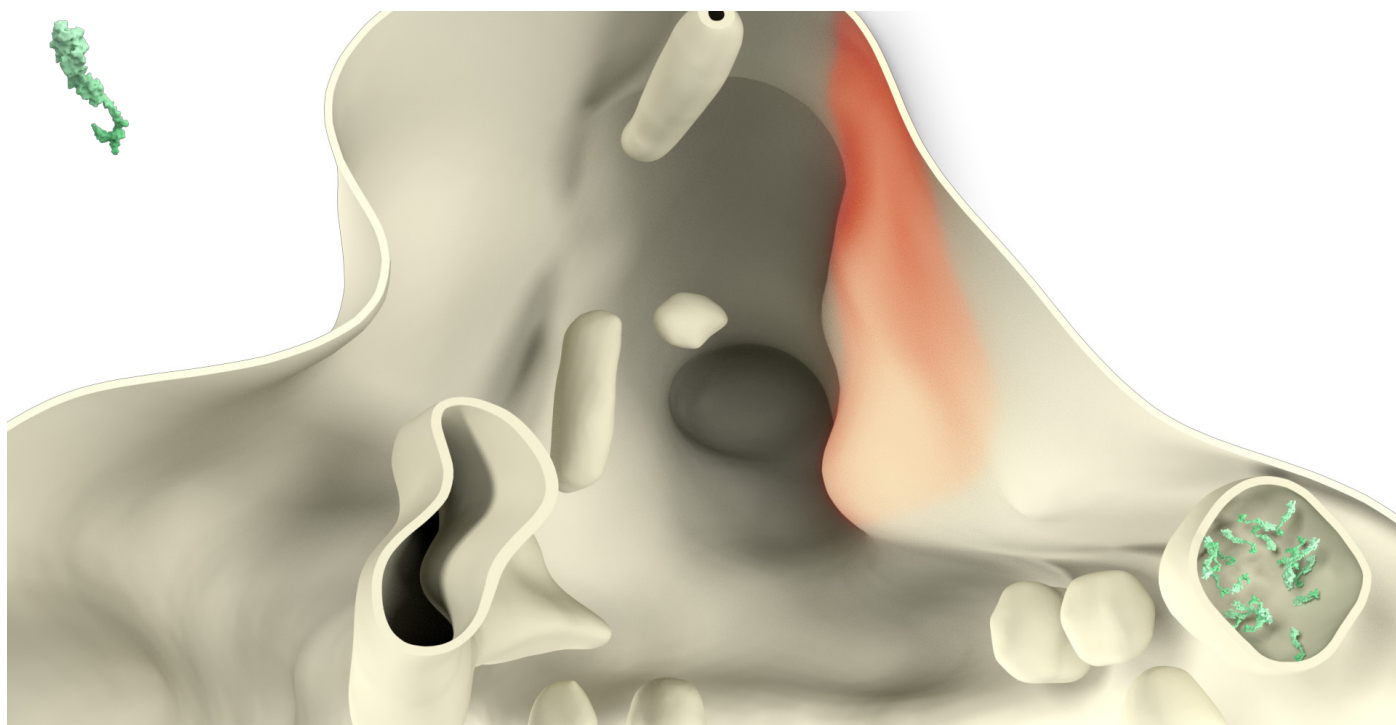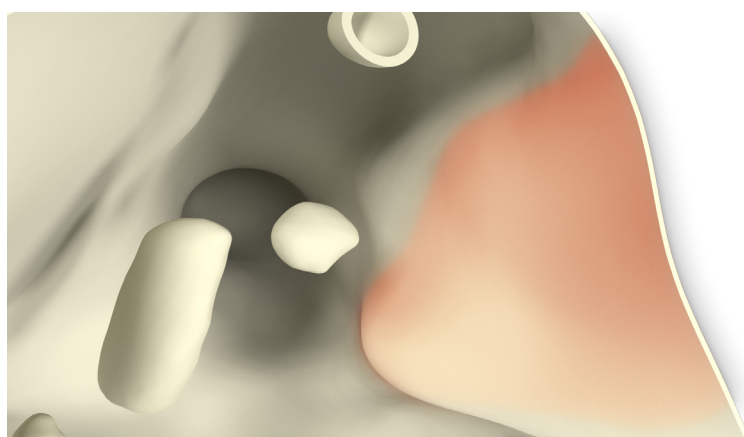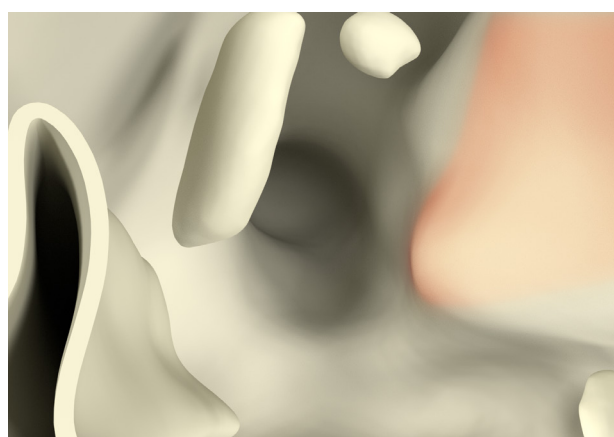

## References

**Antibody:** Synaptic Systems 259 103

**PDB Identifier:** Modelled with I-TASSER

### Literature:

Krömer et al., 1998, J. Cell. Biol.

Montero-Hadjadje et al., 2009, J. Biol. Chem.

Natori and Huttner, 1996, Proc. Natl. Acad. Sci. USA

Sun et al., 2013, Traffic



**Chromogranin C (Secretogranin II, Gene: Scg2, Uniprot ID: P10362)**

**Known function:** Acts as pro-hormone, Involved in LDCV biogenesis

**Known organization:** In LDCV lumen

**Known Interactions:** None

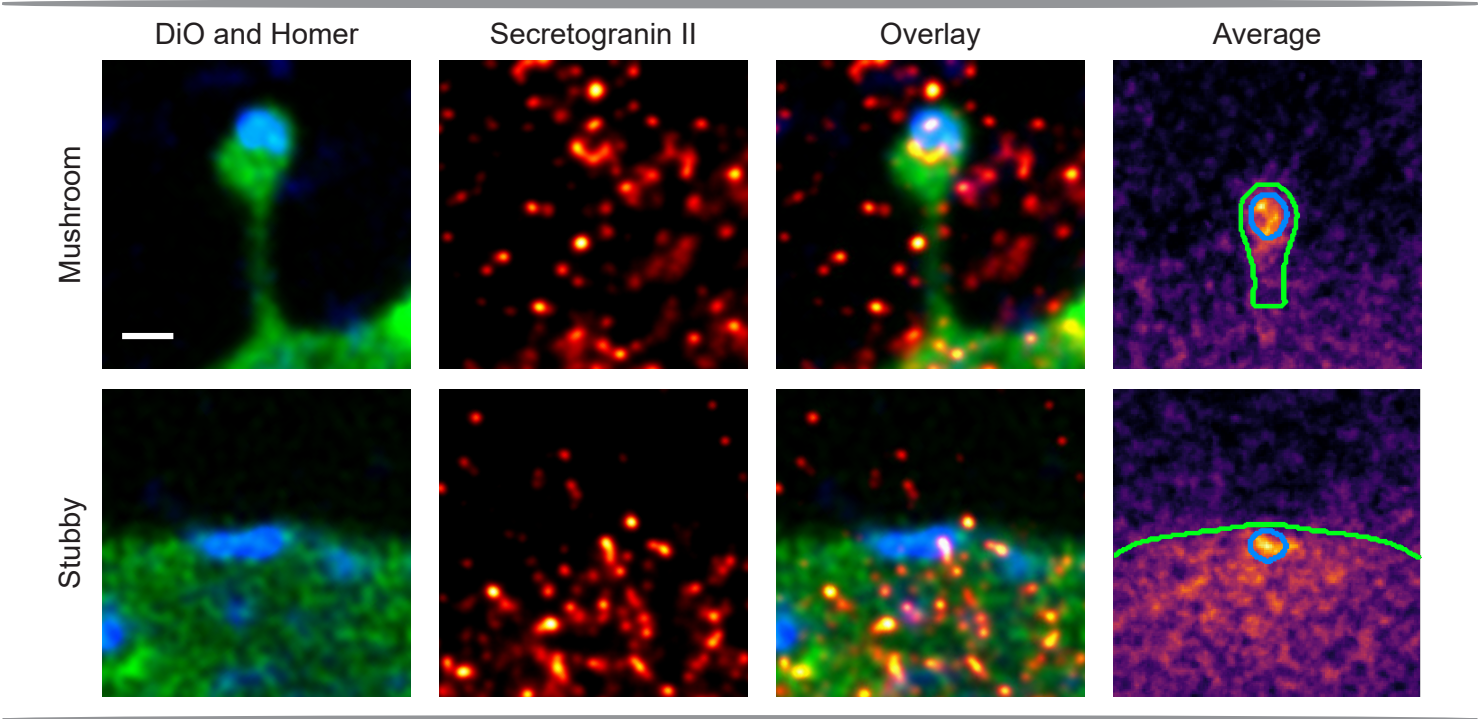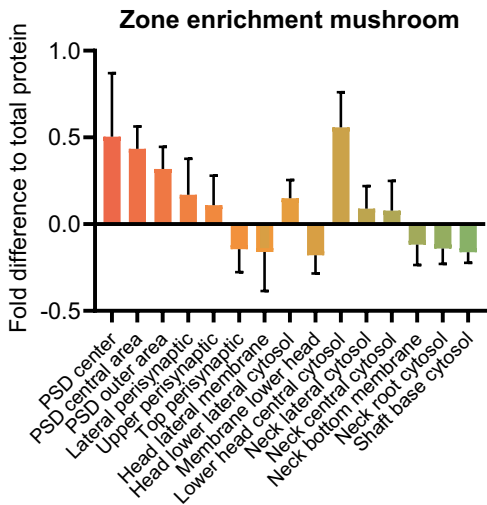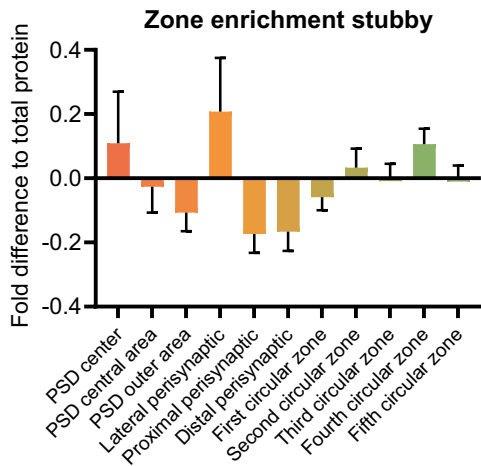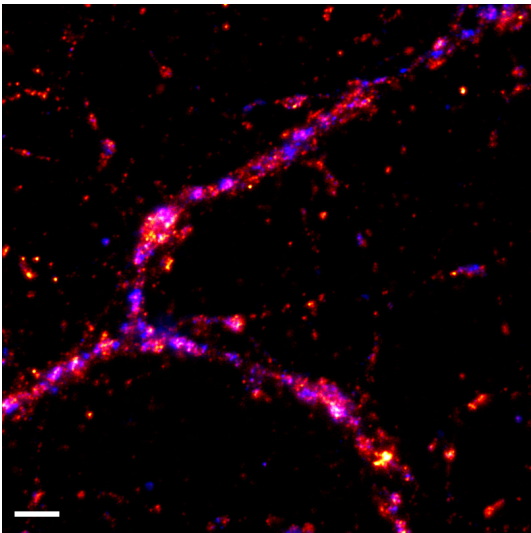

|                        |                    |             |
|------------------------|--------------------|-------------|
| Whole cell copy number | 163866.0 ± 29059.1 |             |
| Spine copy number      | 76.1 ± 16.3        |             |
| Function               | Signaling          |             |
|                        | Mushroom           | Stubby      |
| Spine copy number      | 65.3 ± 14.0        | 97.7 ± 21.0 |
| % of total protein     | 0.0 ± 0.0%         | 0.0 ± 0.0%  |
| Molarity (µM)          | 0.8 ± 0.2          | 0.9 ± 0.2   |
| PSD copy number        | 0 ± 0.0            | 0 ± 0.0     |
| % in PSD               | 0.0 ± 0.0%         | 0.0 ± 0.0%  |

|          | Spine copy number | % of total protein | Molarity ( $\mu\text{M}$ ) | PSD copy number |
|----------|-------------------|--------------------|----------------------------|-----------------|
| Mushroom | $65.3 \pm 14.0$   | $0.0 \pm 0.0\%$    | $0.8 \pm 0.2$              | $0 \pm 0.0$     |
| Stubby   | $97.7 \pm 21.0$   | $0.0 \pm 0.0\%$    | $0.9 \pm 0.2$              | $0 \pm 0.0$     |

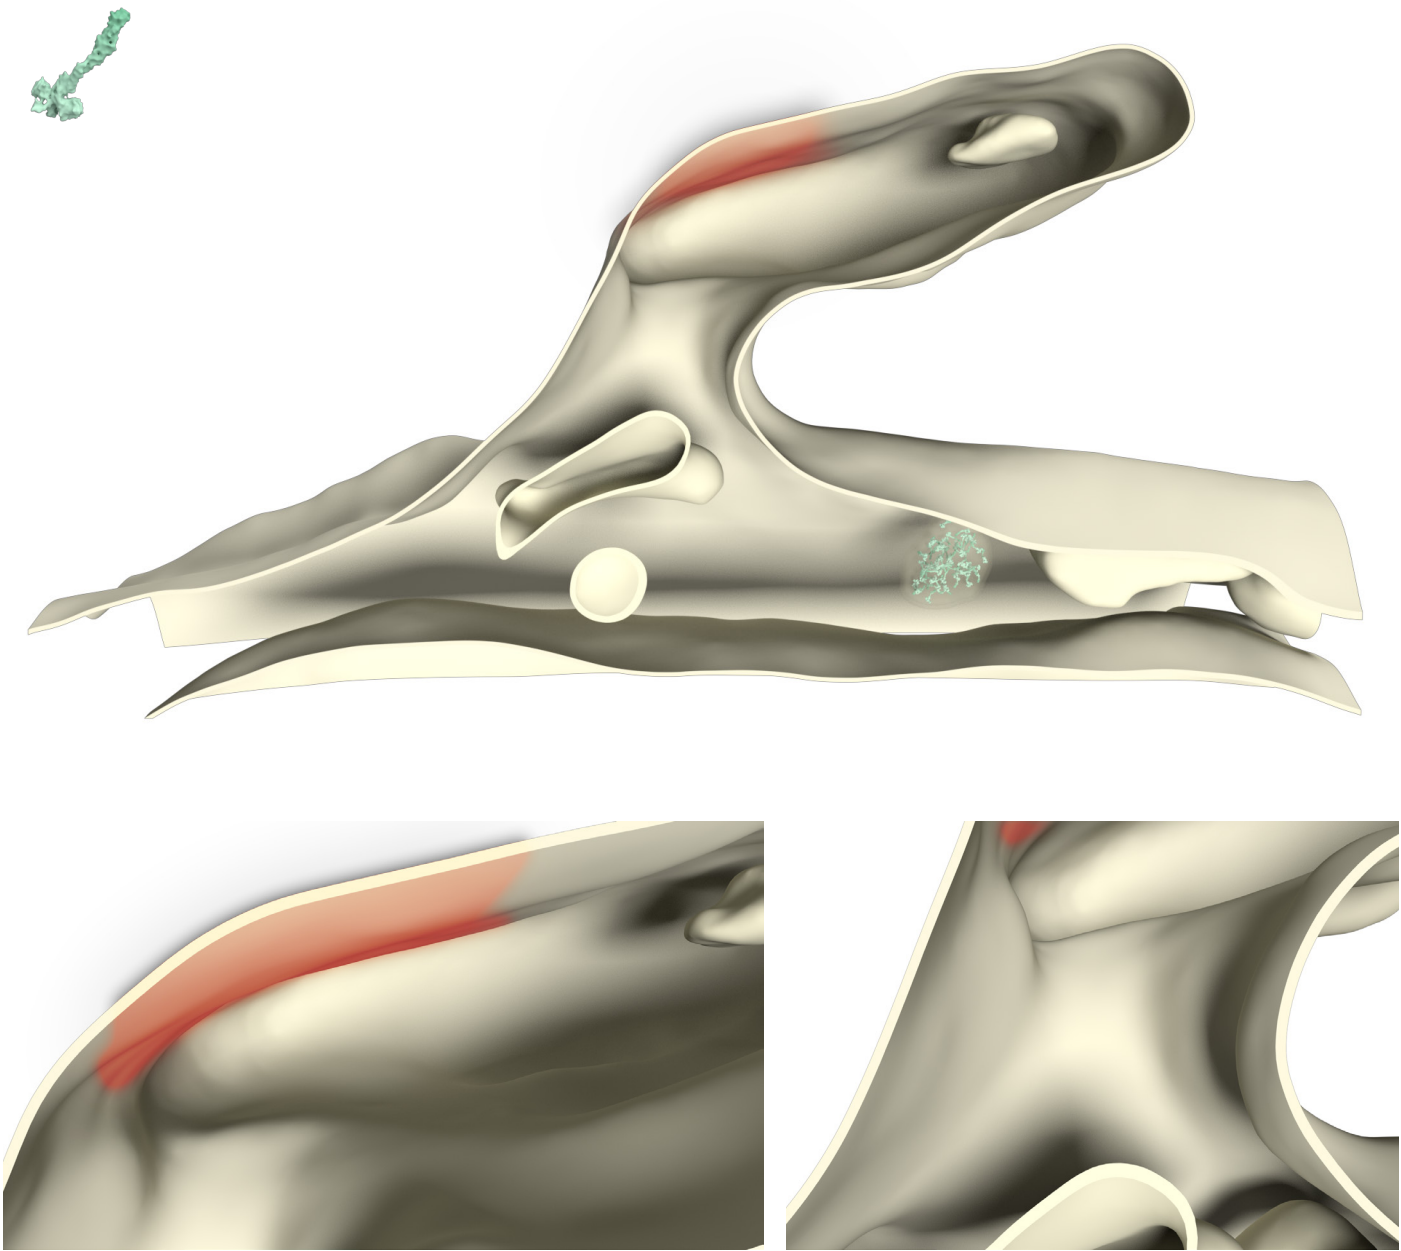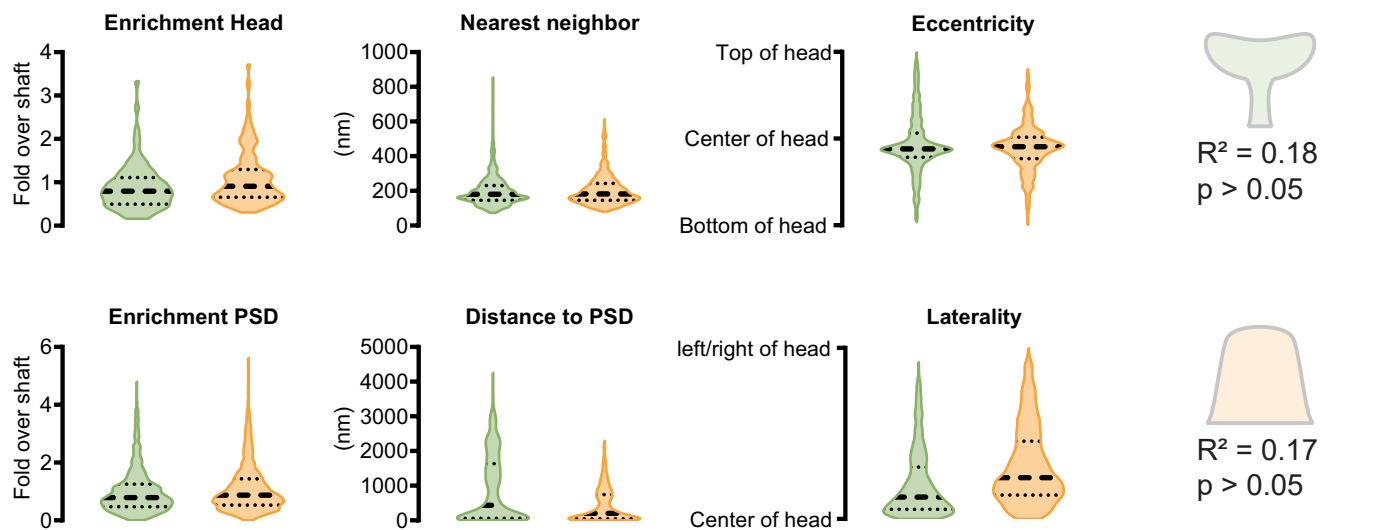

|          | Spine copy number | % of total protein | Molarity ( $\mu\text{M}$ ) | PSD copy number |
|----------|-------------------|--------------------|----------------------------|-----------------|
| Mushroom | $65.3 \pm 14.0$   | $0.0 \pm 0.0\%$    | $0.8 \pm 0.2$              | $0 \pm 0.0$     |
| Stubby   | $97.7 \pm 21.0$   | $0.0 \pm 0.0\%$    | $0.9 \pm 0.2$              | $0 \pm 0.0$     |

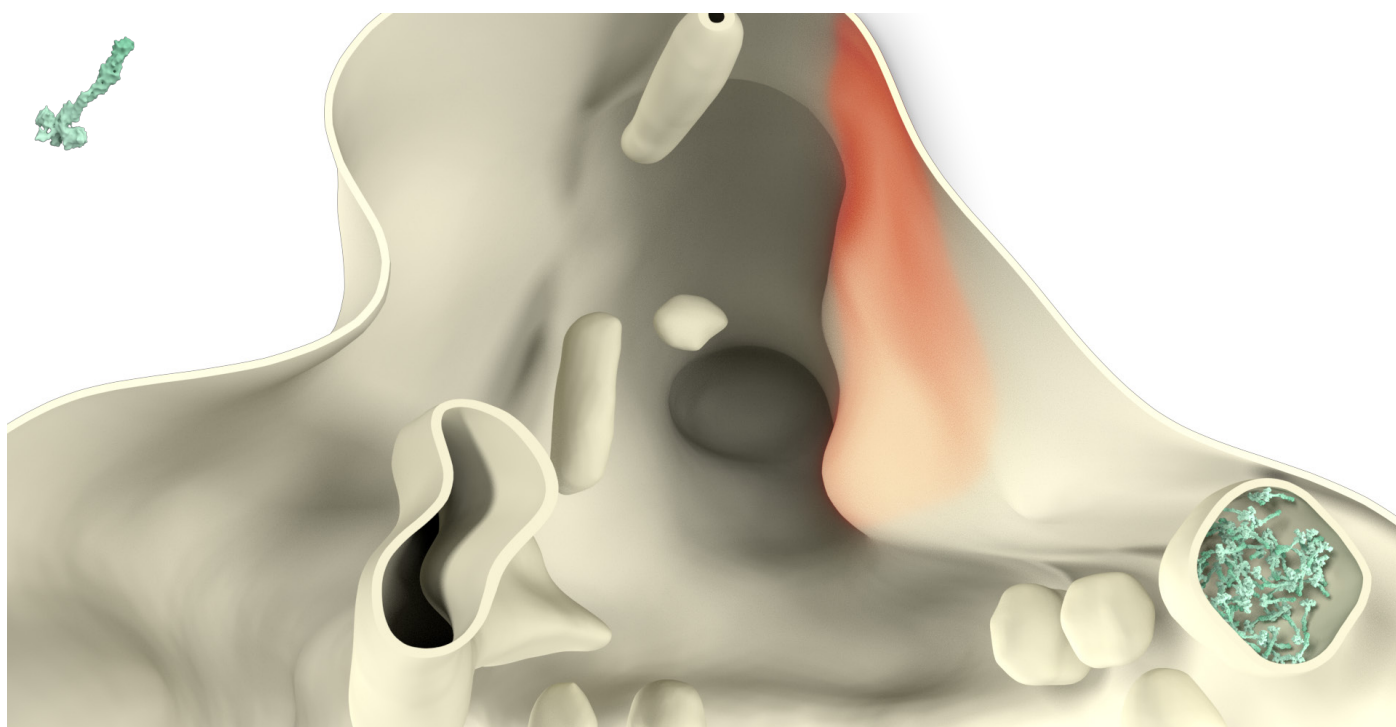

## References

**Antibody:** Abcam ab12241

**PDB Identifier:** Modelled with I-Tasser

### Literature:

Courel et al., 2010, J. Biol. Chem.

Fischer-Colbrie et al., 1995, Prog. Neurobiol.



Clathrin heavy chain (Gene: Cltc, Uniprot ID: Q05140)

**Known function:** Endocytosis

**Known organization:** Cytosolic or membrane-associated, Forms triskelia together with clathrin light chains, Endocytic zones lateral to PSD or on shaft

**Known Interactions:** Clathrin light chains, Adaptor proteins

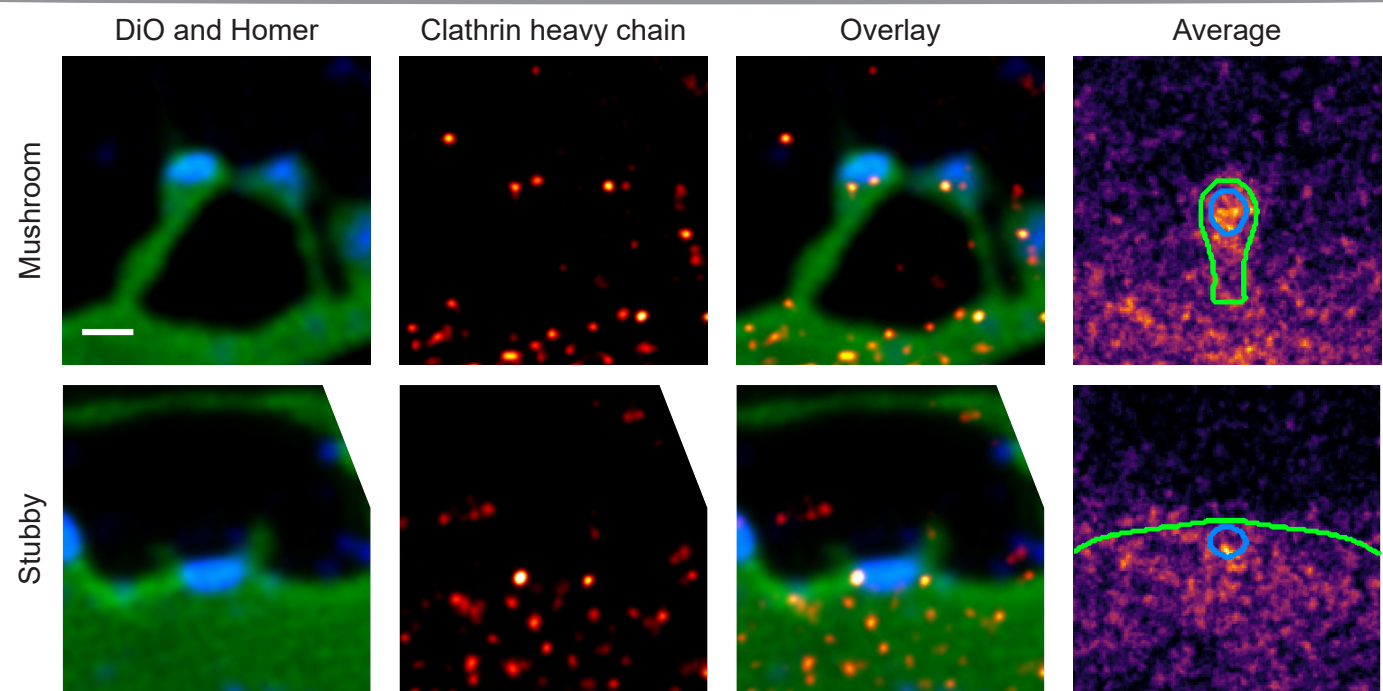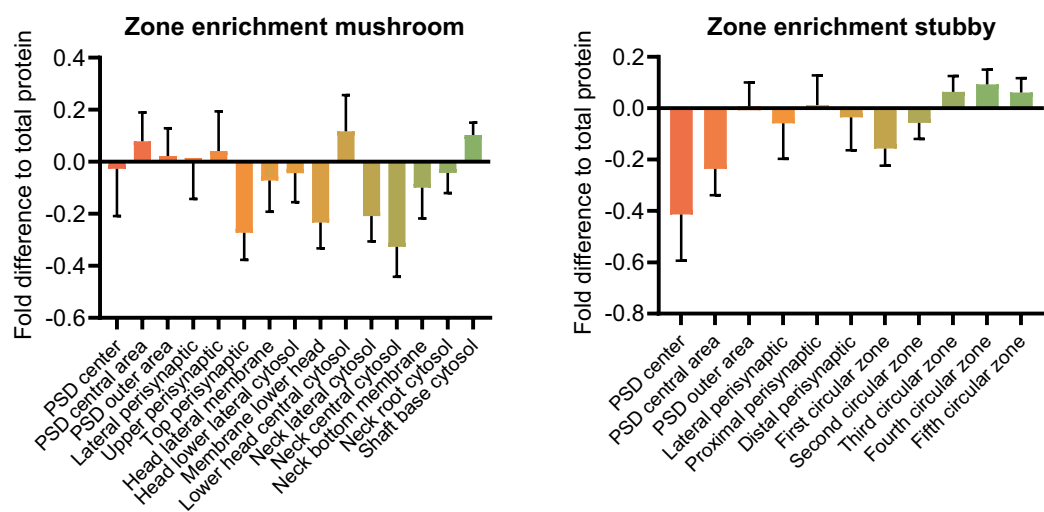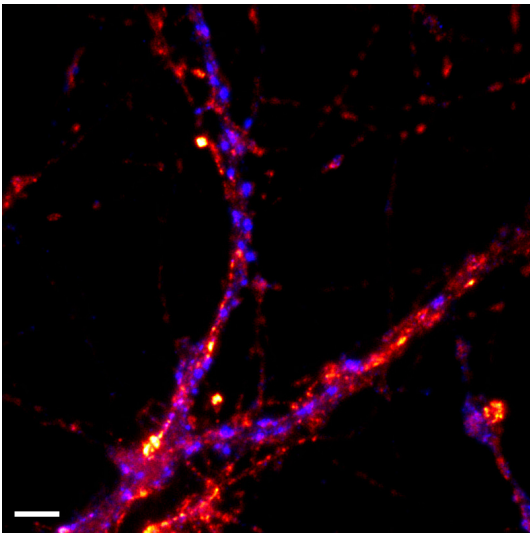

|                        |                            |                |
|------------------------|----------------------------|----------------|
| Whole cell copy number | 5246065.6 ± 725934.0       |                |
| Spine copy number      | 1102.0 ± 239.7             |                |
| Function               | Exo-/Endocytosis cofactors |                |
|                        | Mushroom                   | Stubby         |
| Spine copy number      | 848.5 ± 184.5              | 1384.3 ± 301.1 |
| % of total protein     | 0.8 ± 0.2%                 | 1.1 ± 0.2%     |
| Molarity (µM)          | 10.8 ± 2.3                 | 13.1 ± 2.8     |
| PSD copy number        | 178 ± 38.7                 | 203 ± 44.2     |
| % in PSD               | 21.0 ± 4.6%                | 14.7 ± 3.2%    |

|          | Spine copy number  | % of total protein | Molarity ( $\mu\text{M}$ ) | PSD copy number |
|----------|--------------------|--------------------|----------------------------|-----------------|
| Mushroom | $848.5 \pm 184.5$  | $0.8 \pm 0.2\%$    | $10.8 \pm 2.3$             | $178 \pm 38.7$  |
| Stubby   | $1384.3 \pm 301.1$ | $1.1 \pm 0.2\%$    | $13.1 \pm 2.8$             | $203 \pm 44.2$  |

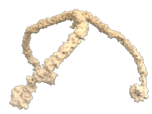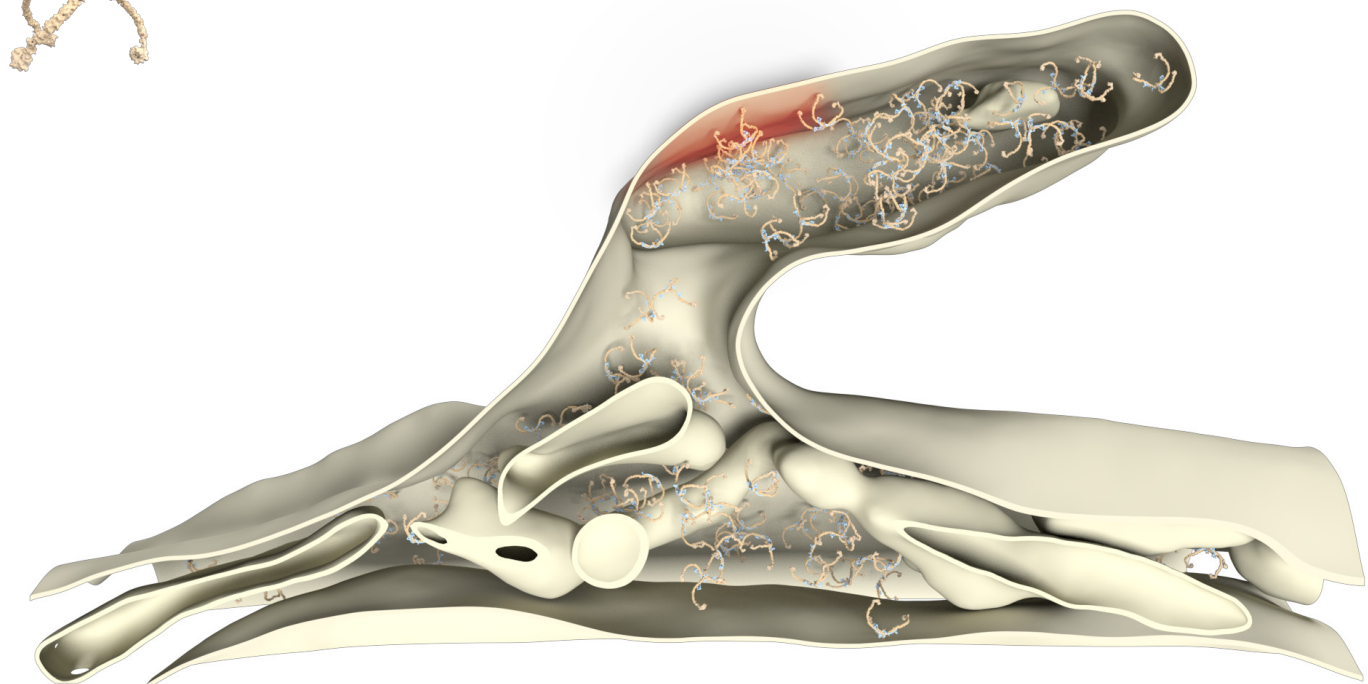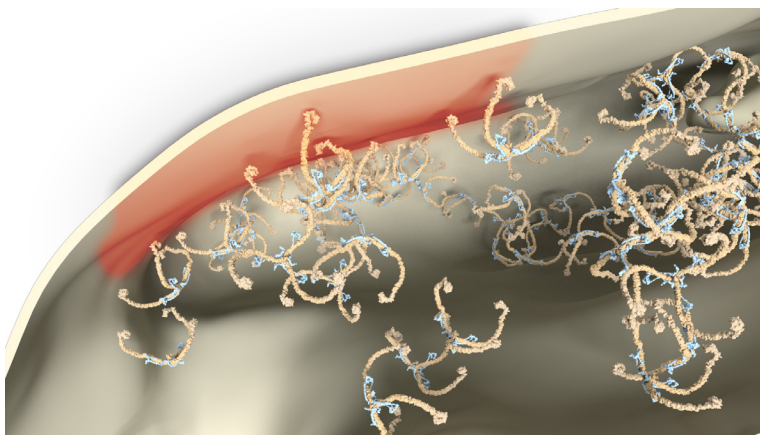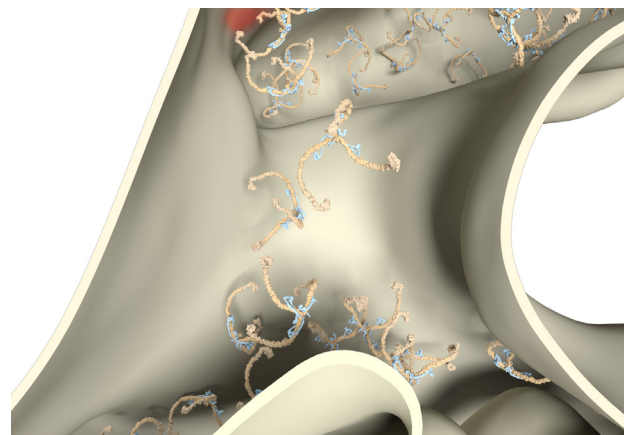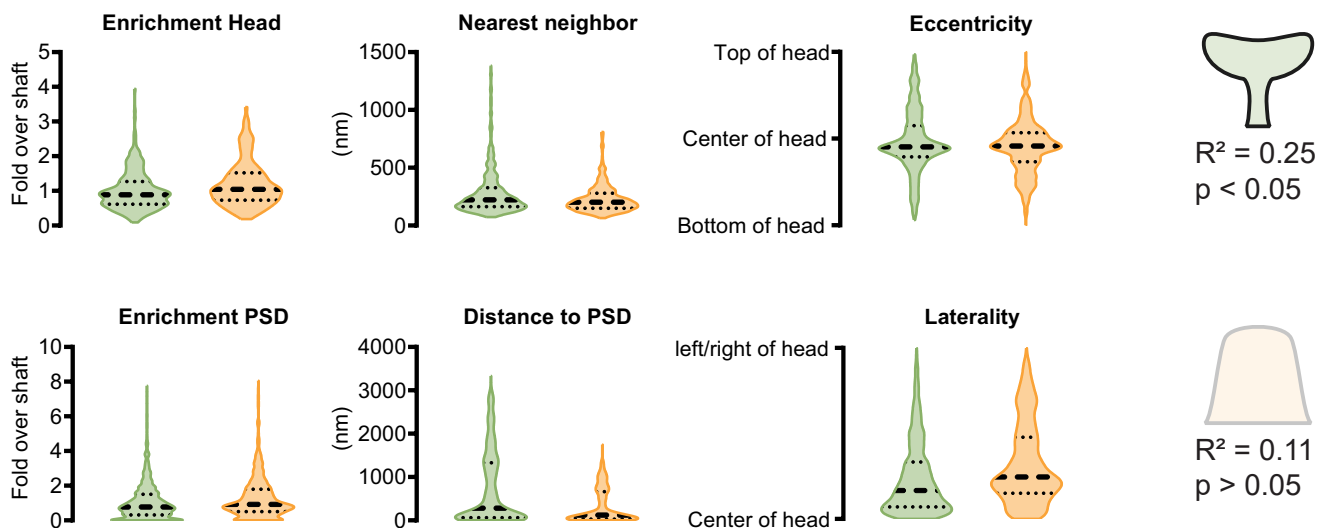



|          | Spine copy number  | % of total protein | Molarity ( $\mu\text{M}$ ) | PSD copy number |
|----------|--------------------|--------------------|----------------------------|-----------------|
| Mushroom | $848.5 \pm 184.5$  | $0.8 \pm 0.2\%$    | $10.8 \pm 2.3$             | $178 \pm 38.7$  |
| Stubby   | $1384.3 \pm 301.1$ | $1.1 \pm 0.2\%$    | $13.1 \pm 2.8$             | $203 \pm 44.2$  |

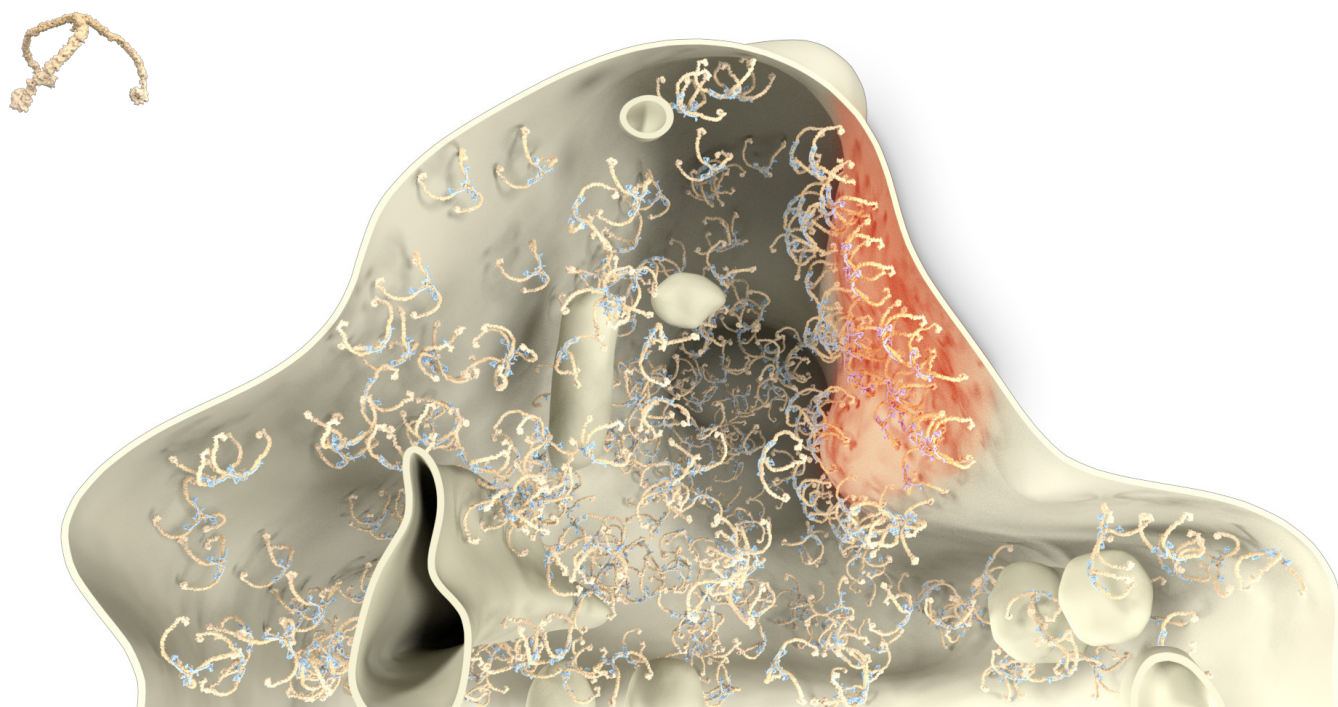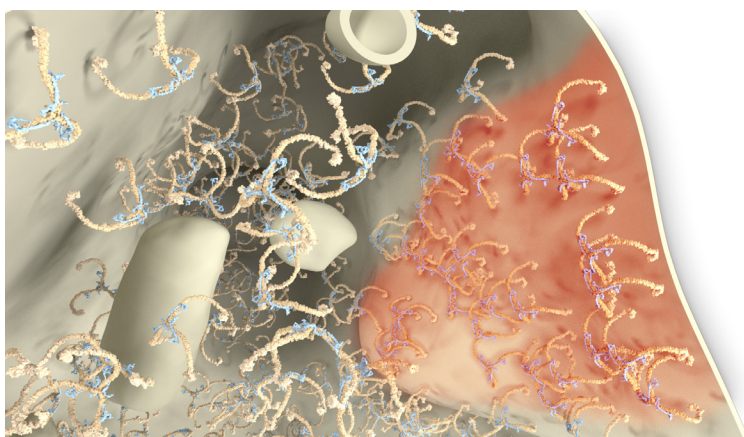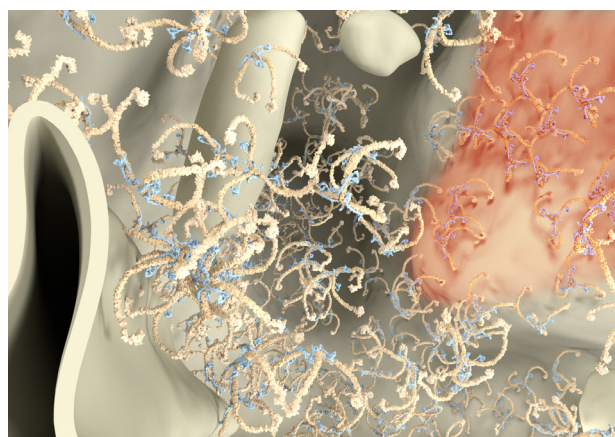

## References

**Antibody:** BD Biosciences 610499

**PDB Identifier:** 1xi4

### Literature:

Blanpied et al., 2002, Neuron

Boehm et al., 2006, Neuron

Cheng et al., 2007, J. Mol. Biol.

Cooney et al., 2002, J. Neurosci.

Loebrich et al., 2013, Proc. Natl. Acad. Sci. U S A

Lu et al., 2007, Neuron

Musacchio et al., 1999, Mol. Cell.

Park et al., 2006, Neuron

Rácz et al., 2004, Nat. Neurosci.

Rosendale et al., 2017, Cell. Rep.

Tao-Cheng et al., 2011, J. Neurosci.

Ungewickell and Branton, 1981, Nature

Yudowski et al., 2007, J. Neurosci.



## Clathrin light chain a & b (Genes: Clta & Cltb , Uniprot IDs: P08081 & P08082 )

**Known function:** Endocytosis

**Known organization:** Cytosolic or membrane-associated, Forms triskelia together with clathrin heavy hains, On endocytic zones lateral to PSD or on shaft

**Known Interactions:** Clathrin light chains, Adaptor proteins

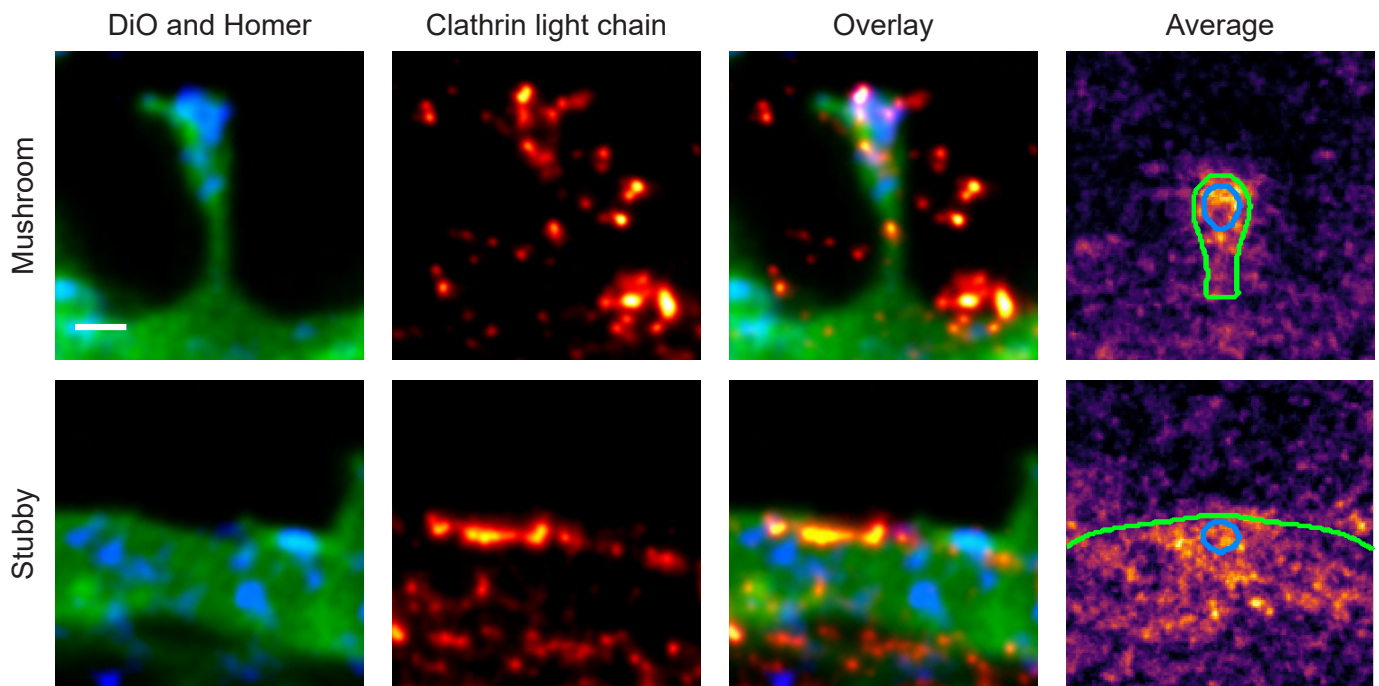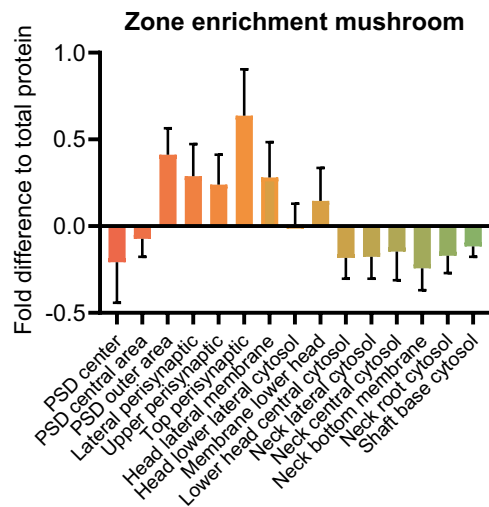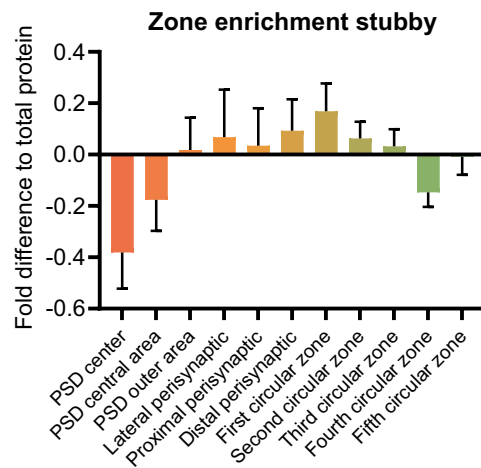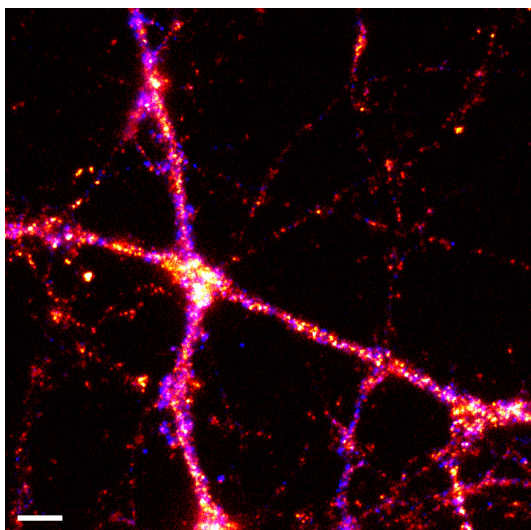

|                        |                            |                  |
|------------------------|----------------------------|------------------|
| Whole cell copy number | 37063124.7 ± 3129866.2     |                  |
| Spine copy number      | 11708.3 ± 2349.5           |                  |
| Function               | Exo-/Endocytosis cofactors |                  |
|                        | Mushroom                   | Stubby           |
| Spine copy number      | 10105.7 ± 2027.9           | 13270.1 ± 2662.9 |
| % of total protein     | 1.2 ± 0.3%                 | 1.4 ± 0.3%       |
| Molarity (μM)          | 128.3 ± 25.8               | 125.4 ± 25.2     |
| PSD copy number        | 2654 ± 532.6               | 1424 ± 285.7     |
| % in PSD               | 26.3 ± 5.3%                | 10.7 ± 2.2%      |

|          | Spine copy number    | % of total protein | Molarity ( $\mu\text{M}$ ) | PSD copy number  |
|----------|----------------------|--------------------|----------------------------|------------------|
| Mushroom | $10105.7 \pm 2027.9$ | $1.2 \pm 0.3\%$    | $128.3 \pm 25.8$           | $2654 \pm 532.6$ |
| Stubby   | $13270.1 \pm 2662.9$ | $1.4 \pm 0.3\%$    | $125.4 \pm 25.2$           | $1424 \pm 285.7$ |

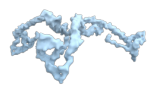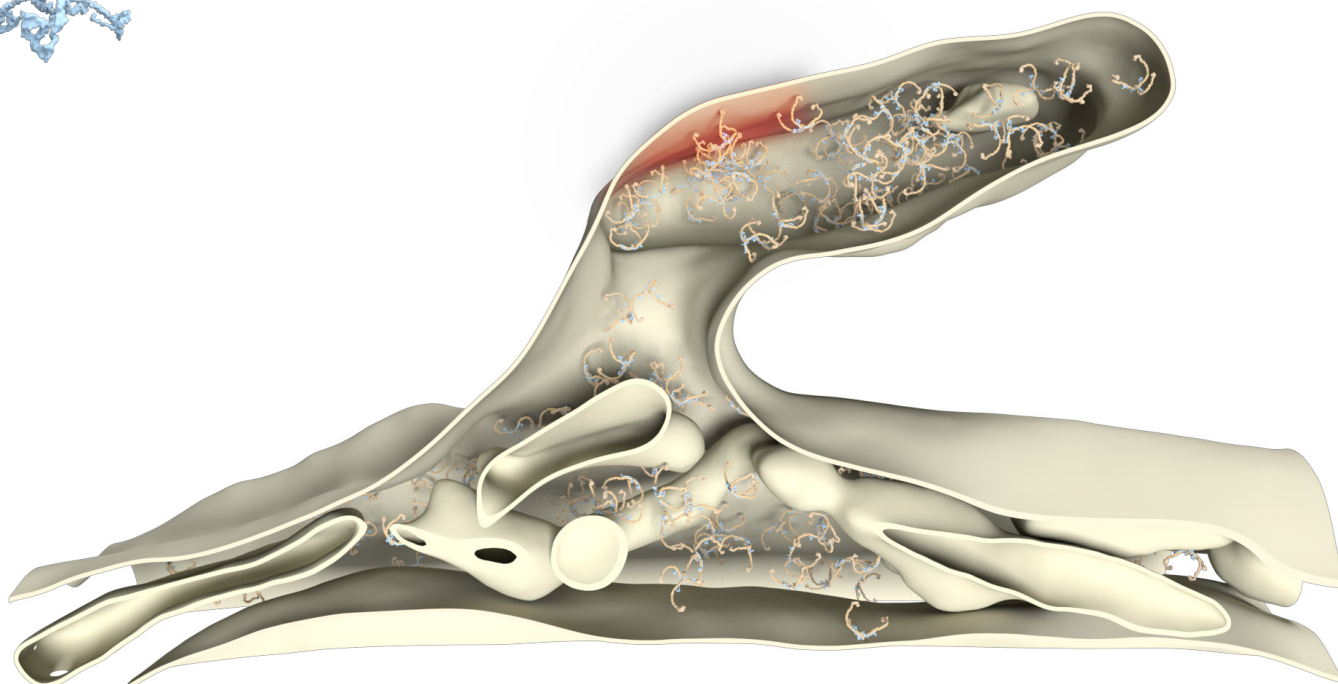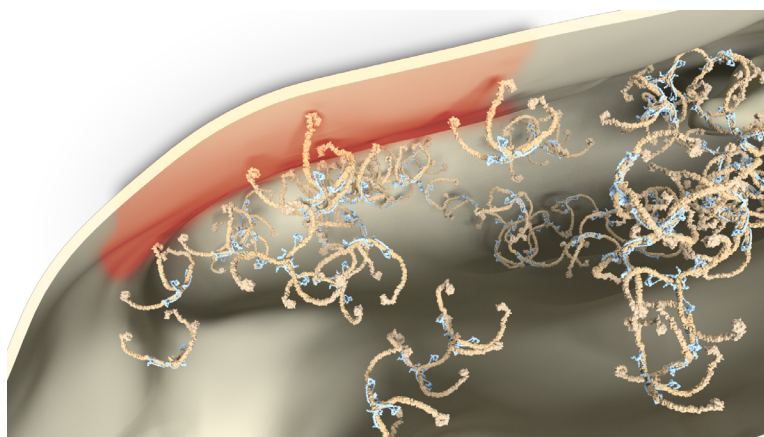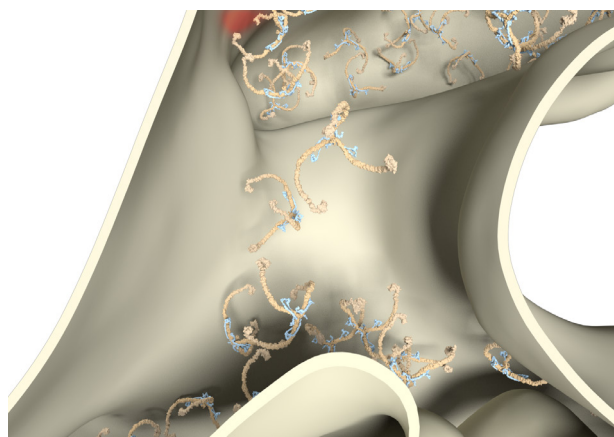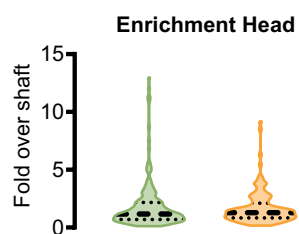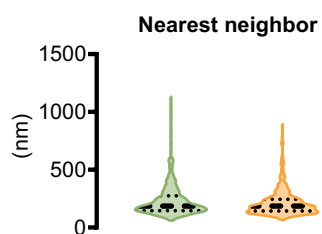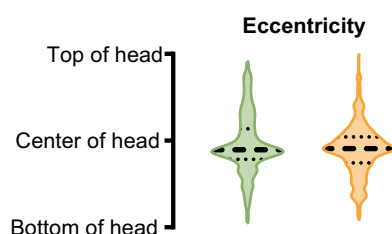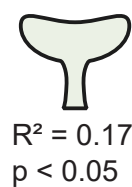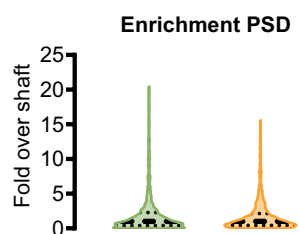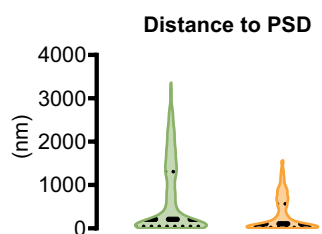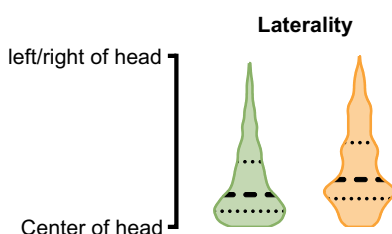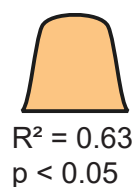



|          | Spine copy number    | % of total protein | Molarity ( $\mu\text{M}$ ) | PSD copy number  |
|----------|----------------------|--------------------|----------------------------|------------------|
| Mushroom | $10105.7 \pm 2027.9$ | $1.2 \pm 0.3\%$    | $128.3 \pm 25.8$           | $2654 \pm 532.6$ |
| Stubby   | $13270.1 \pm 2662.9$ | $1.4 \pm 0.3\%$    | $125.4 \pm 25.2$           | $1424 \pm 285.7$ |

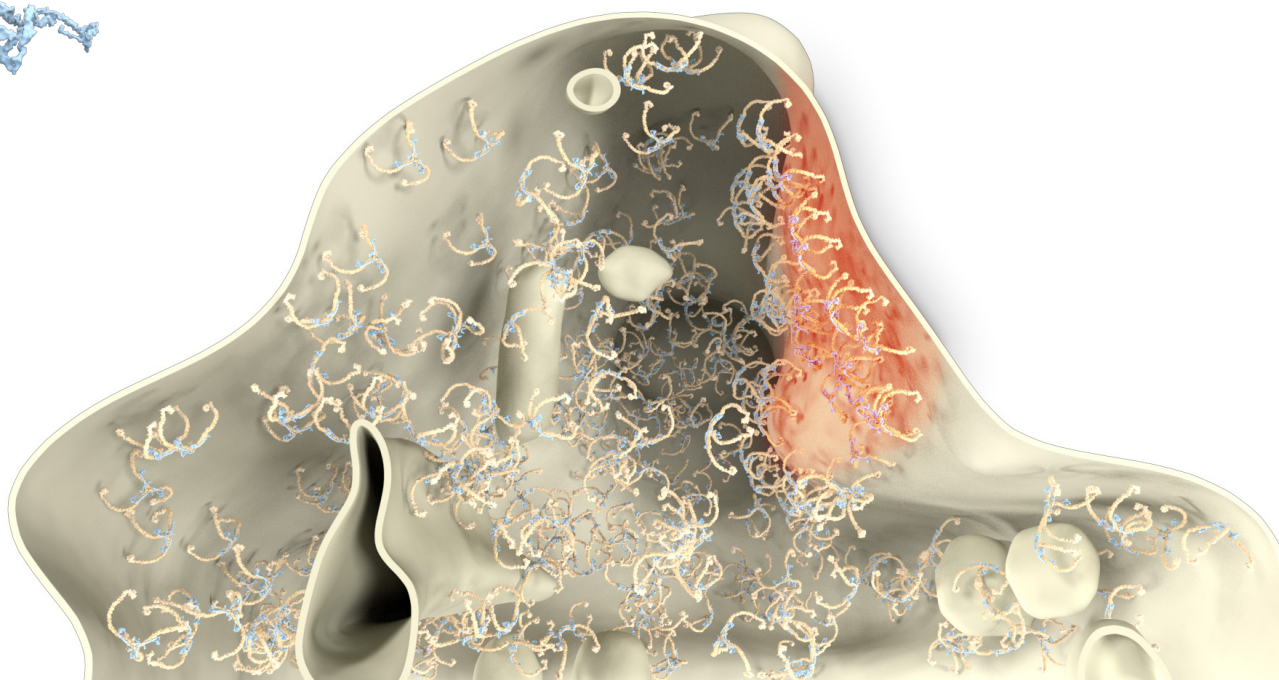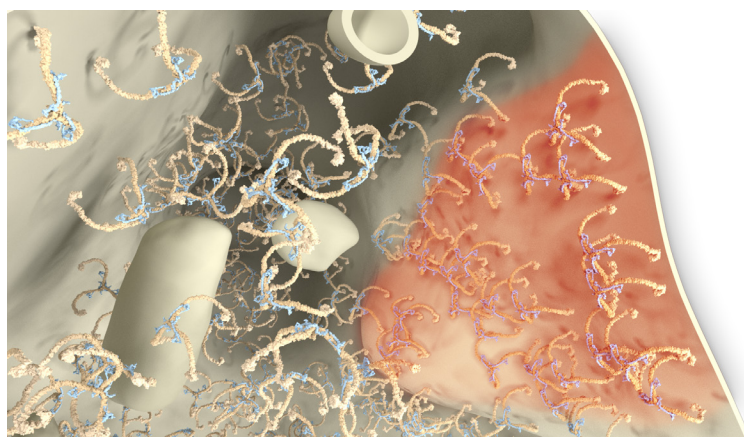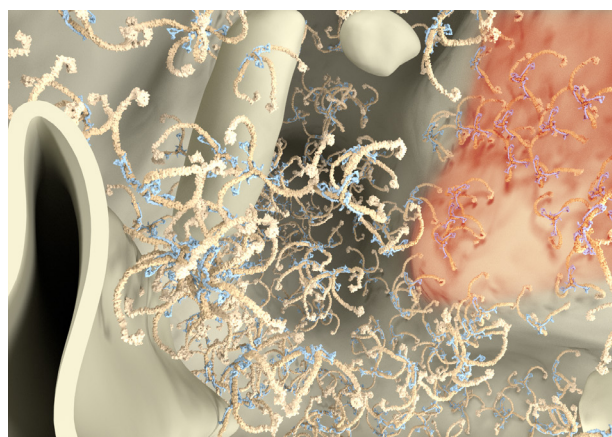

## References

**Antibody:** Synaptic Systems 113 011

**PDB Identifier:** 1xi4

### Literature:

Blanpied et al., 2002, Neuron

Boehm et al., 2006, Neuron

Cheng et al., 2007, J. Mol. Biol.

Cooney et al., 2002, J. Neurosci.

Loebrich et al., 2013, Proc. Natl. Acad. Sci. U S A

Lu et al., 2007, Neuron

Musacchio et al., 1999, Mol. Cell.

Park et al., 2006, Neuron

Rácz et al., 2004, Nat. Neurosci.

Rosendale et al., 2017, Cell. Rep.

Tao-Cheng et al., 2011, J. Neurosci.

Ungewickell and Branton, 1981, Nature

Yudowski et al., 2007, J. Neurosci.



## Cortactin (Gene: Cctn, Uniprot ID: Q66HL2)

**Known function:** Branching and Stabilization of Actin, Involved in PSD95 clustering

**Known organization:** Cytosolic

**Known Interactions:** Actin, Shank proteins, PSD95

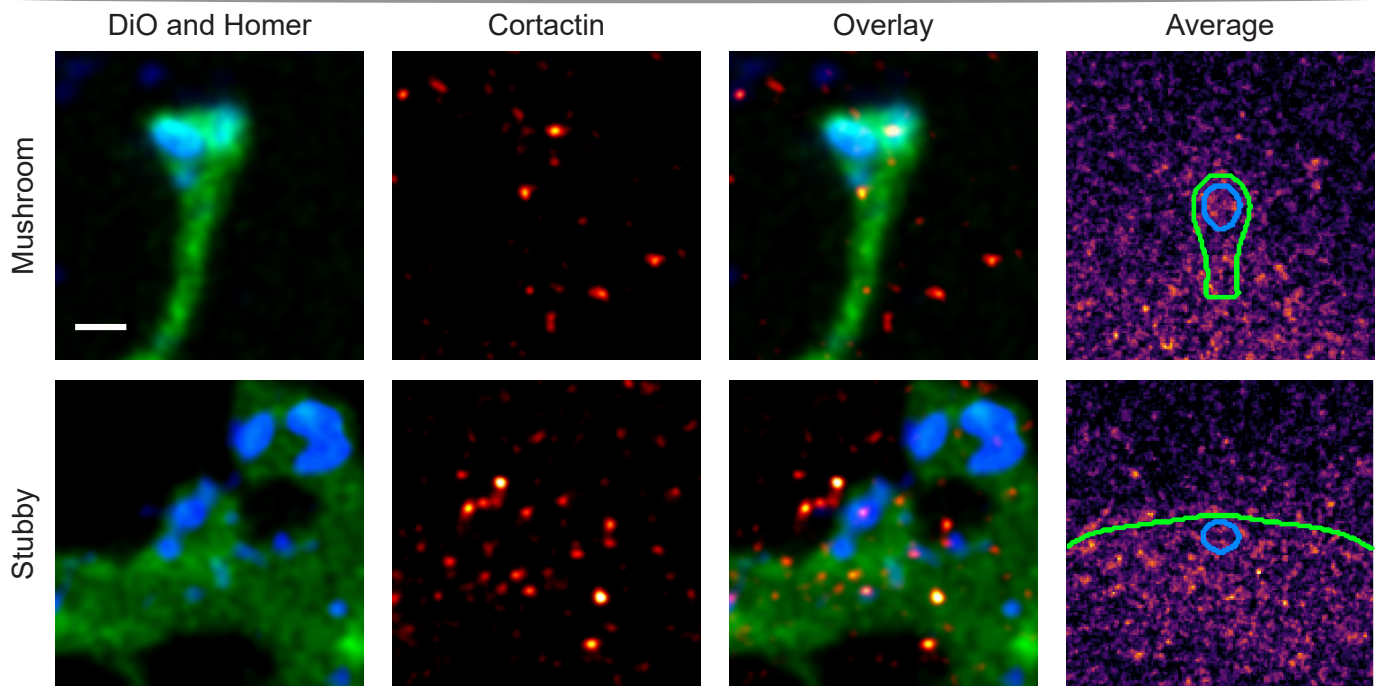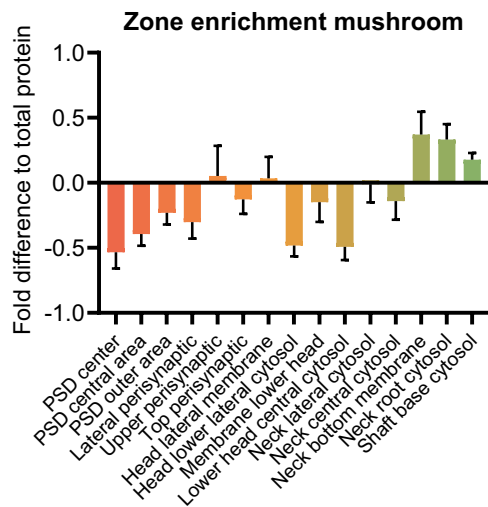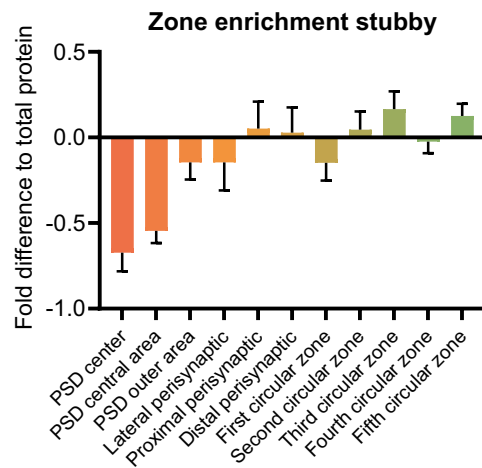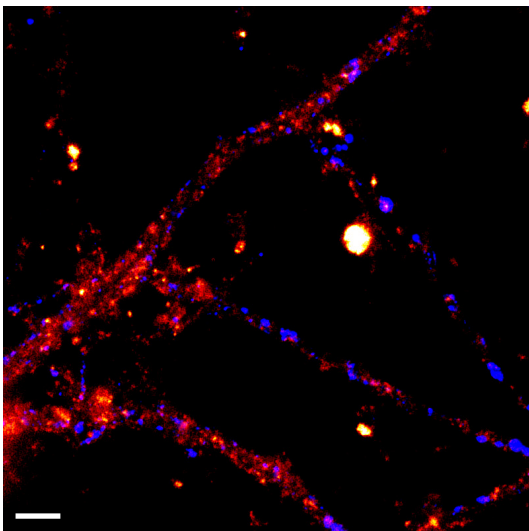

|                        |                      |              |
|------------------------|----------------------|--------------|
| Whole cell copy number | 1298507.4 ± 190151.8 |              |
| Spine copy number      | 121.2 ± 51.0         |              |
| Function               | Cytoskeleton         |              |
|                        | Mushroom             | Stubby       |
| Spine copy number      | 101.6 ± 42.8         | 161.6 ± 68.0 |
| % of total protein     | 0.0 ± 0.0%           | 0.0 ± 0.0%   |
| Molarity (μM)          | 1.3 ± 0.5            | 1.5 ± 0.6    |
| PSD copy number        | 10 ± 4.2             | 13 ± 5.5     |
| % in PSD               | 9.8 ± 4.1%           | 8.0 ± 3.4%   |

|          | Spine copy number | % of total protein | Molarity ( $\mu\text{M}$ ) | PSD copy number |
|----------|-------------------|--------------------|----------------------------|-----------------|
| Mushroom | $101.6 \pm 42.8$  | $0.0 \pm 0.0\%$    | $1.3 \pm 0.5$              | $10 \pm 4.2$    |
| Stubby   | $161.6 \pm 68.0$  | $0.0 \pm 0.0\%$    | $1.5 \pm 0.6$              | $13 \pm 5.5$    |

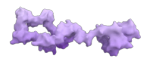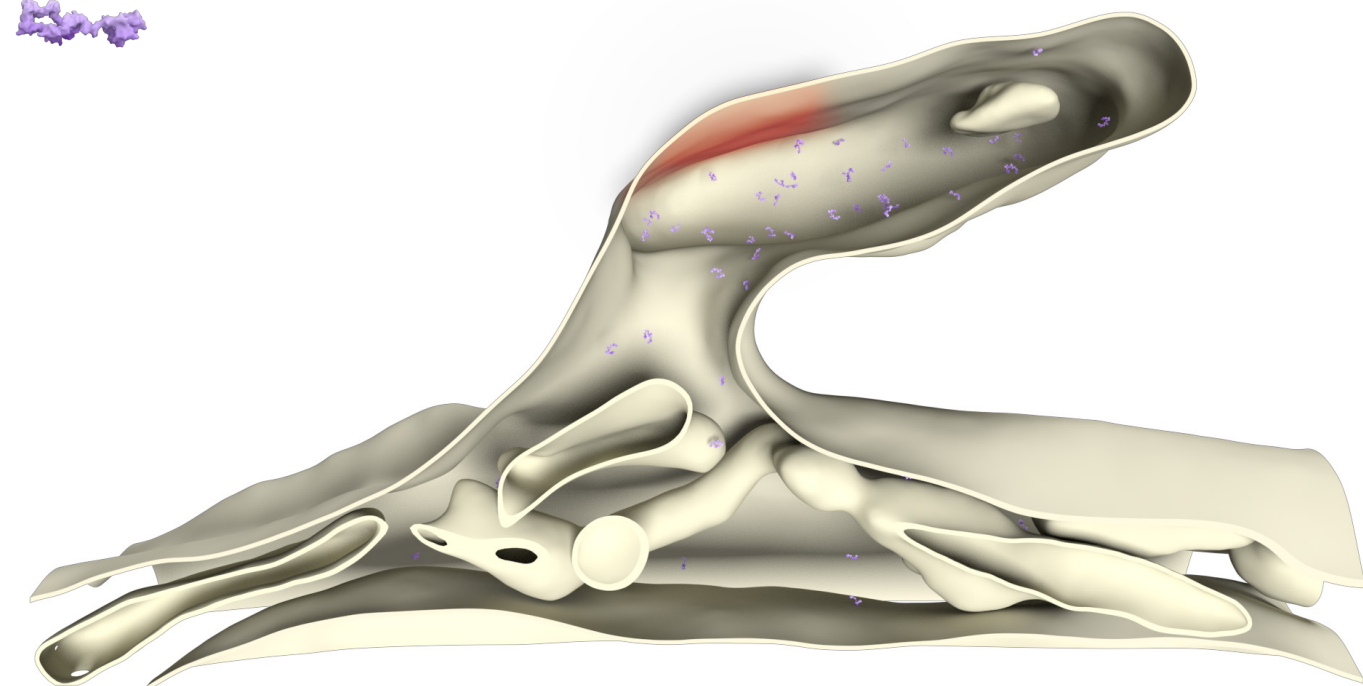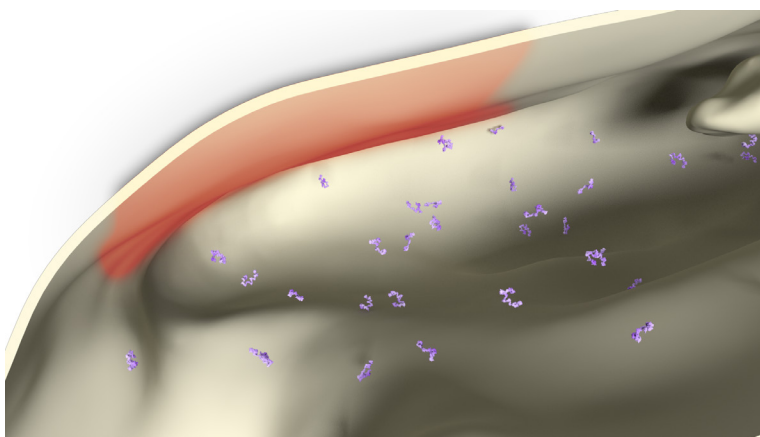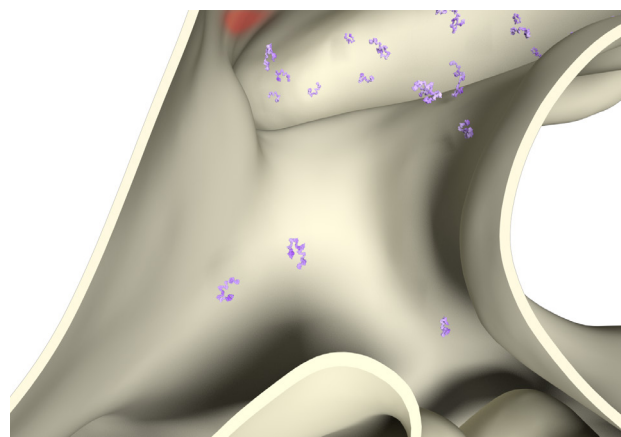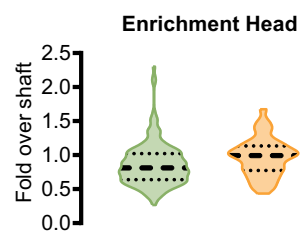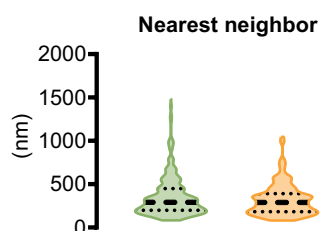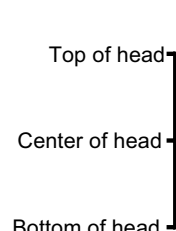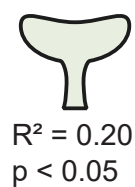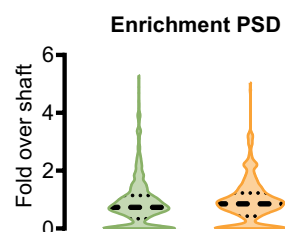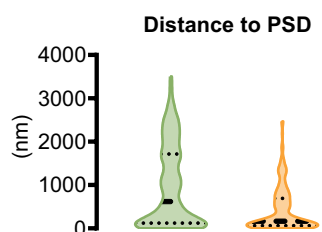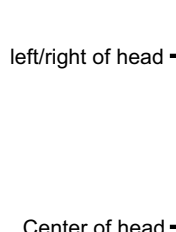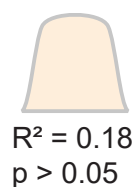

|          | Spine copy number | % of total protein | Molarity ( $\mu\text{M}$ ) | PSD copy number |
|----------|-------------------|--------------------|----------------------------|-----------------|
| Mushroom | $101.6 \pm 42.8$  | $0.0 \pm 0.0\%$    | $1.3 \pm 0.5$              | $10 \pm 4.2$    |
| Stubby   | $161.6 \pm 68.0$  | $0.0 \pm 0.0\%$    | $1.5 \pm 0.6$              | $13 \pm 5.5$    |

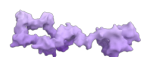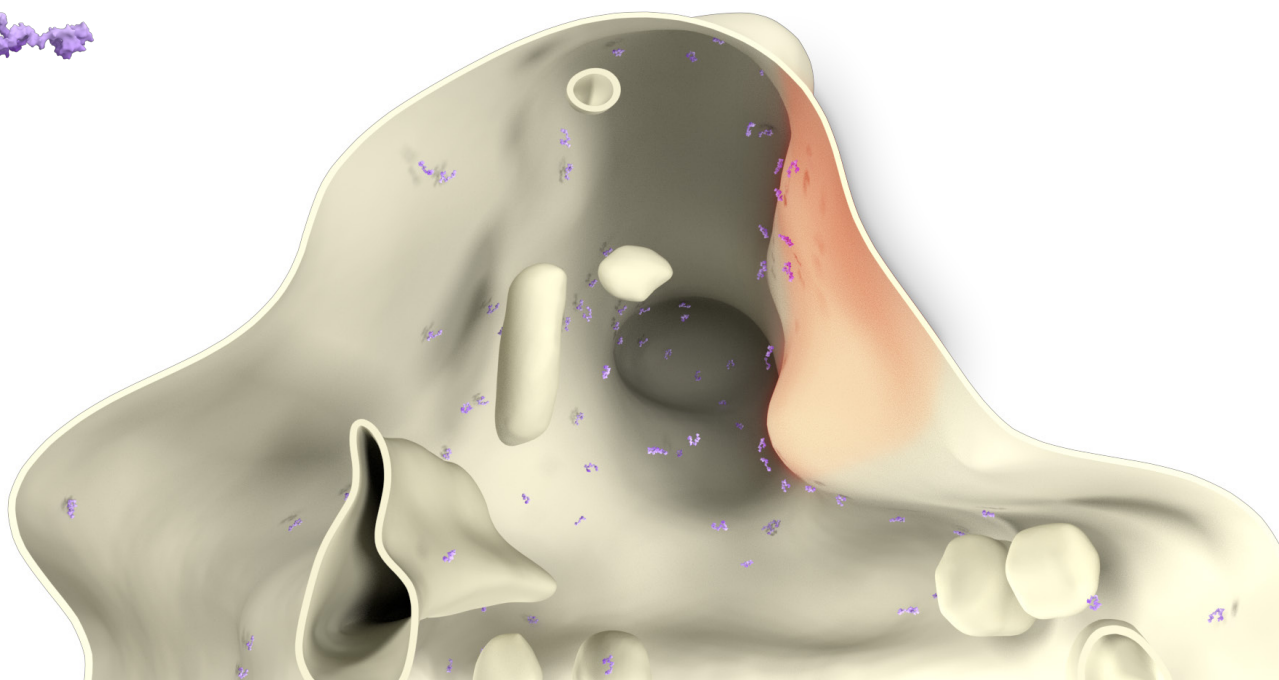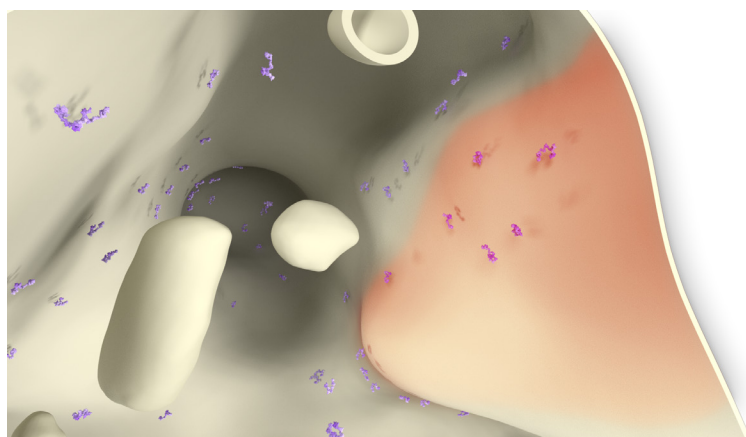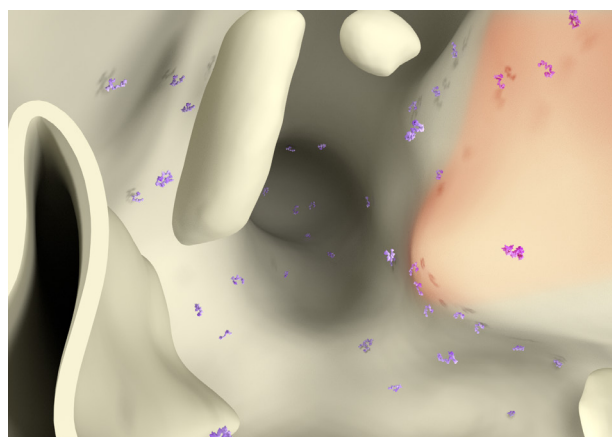

## References

**Antibody:** Synaptic Systems 313 111

**PDB Identifier:** 3ulr, 2d1x

### Literature:

Catarino et al., 2013, J. Cell. Sci.

Du et al., 1998, Mol. Cell. Biol.

MacGillavry et al., 2016, Eur. J. Neurosci.

Naisbitt et al., 1999, Neuron

Ren et al., 2009, J. Biol. Chem.

Rostaing et al., 2006, Eur. J. Neurosci.

Wu and Parsons, 1993, J. Cell. Biol.



**DLGAP1 (GKAP1, SAPAP1, DAP-1, Gene: Dlgap1, Uniprot ID: P97836)**

**Known function:** Links PSD95 to Shank proteins  
**Known organization:** Cytosolic, Forms clusters within PSD  
**Known Interactions:** PSD95, SAP97, Shank proteins

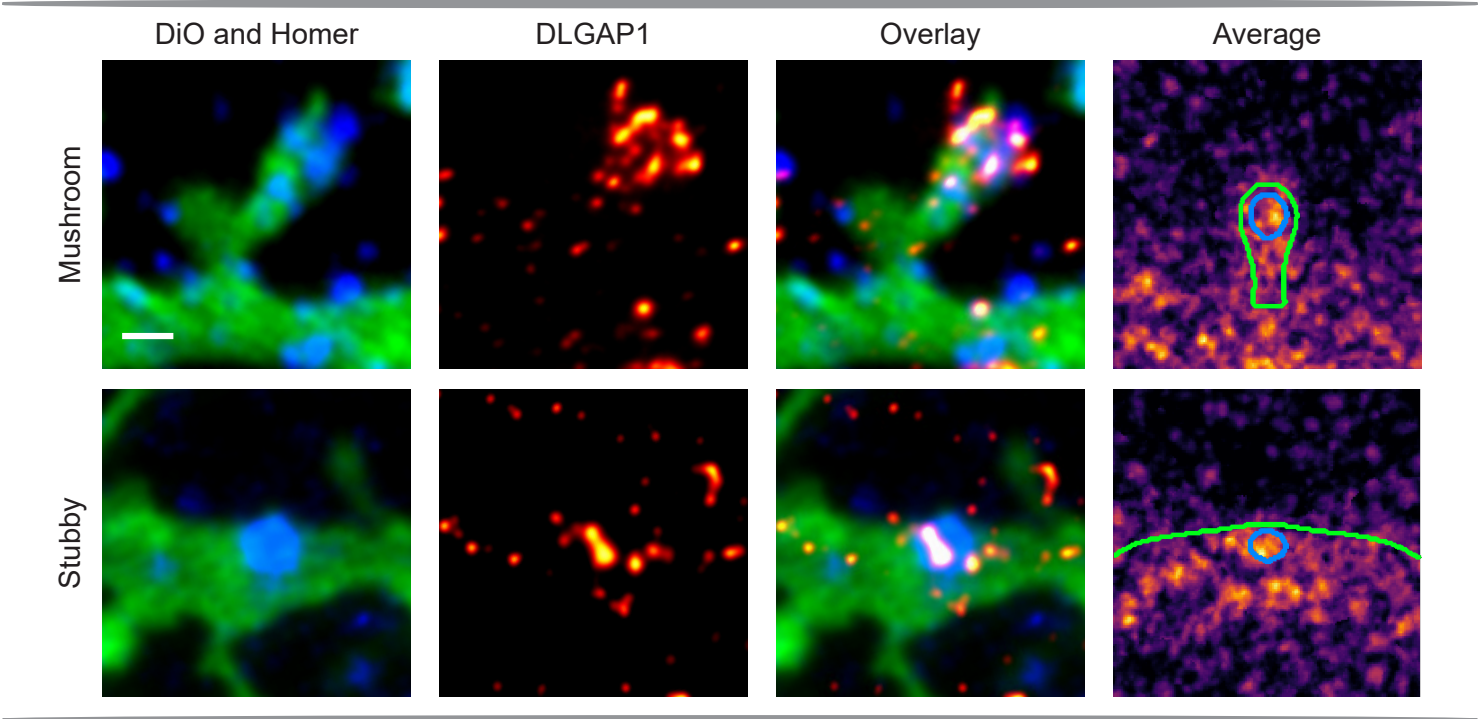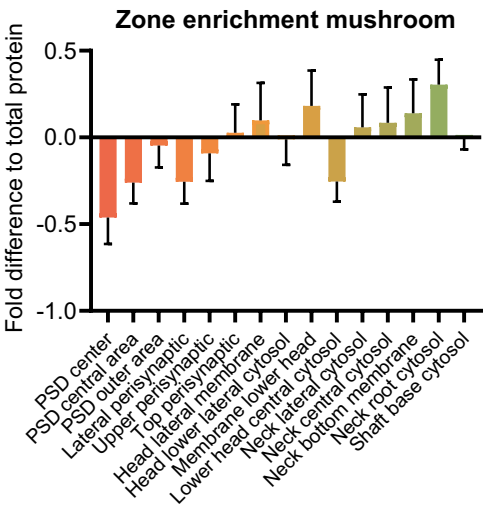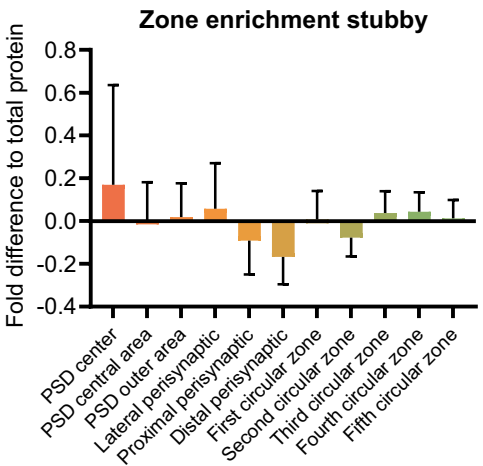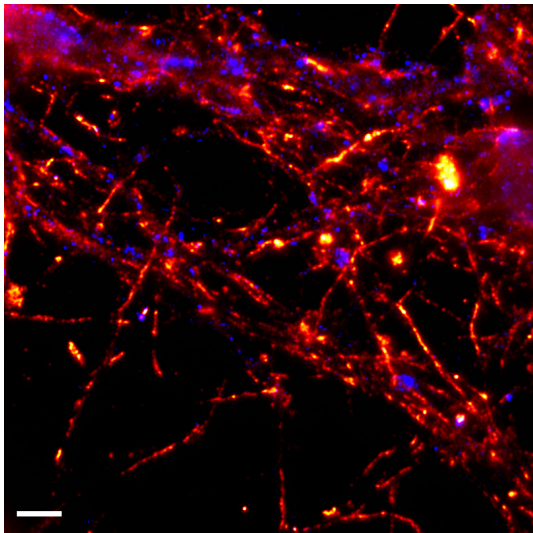

|                        |                   |             |
|------------------------|-------------------|-------------|
| Whole cell copy number | 57934.1 ± 13537.9 |             |
| Spine copy number      | 5.3 ± 2.3         |             |
| Function               | PSD Scaffold      |             |
|                        | Mushroom          | Stubby      |
| Spine copy number      | 3.7 ± 1.6         | 7.3 ± 3.2   |
| % of total protein     | 0.0 ± 0.0%        | 0.0 ± 0.0%  |
| Molarity (μM)          | 0.0 ± 0.0         | 0.1 ± 0.0   |
| PSD copy number        | 0 ± 0.0           | 1 ± 0.4     |
| % in PSD               | 0.0 ± 0.0%        | 13.7 ± 6.0% |

|          | Spine copy number | % of total protein | Molarity ( $\mu\text{M}$ ) | PSD copy number |
|----------|-------------------|--------------------|----------------------------|-----------------|
| Mushroom | $3.7 \pm 1.6$     | $0.0 \pm 0.0\%$    | $0.0 \pm 0.0$              | $0 \pm 0.0$     |
| Stubby   | $7.3 \pm 3.2$     | $0.0 \pm 0.0\%$    | $0.1 \pm 0.0$              | $1 \pm 0.4$     |

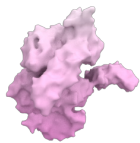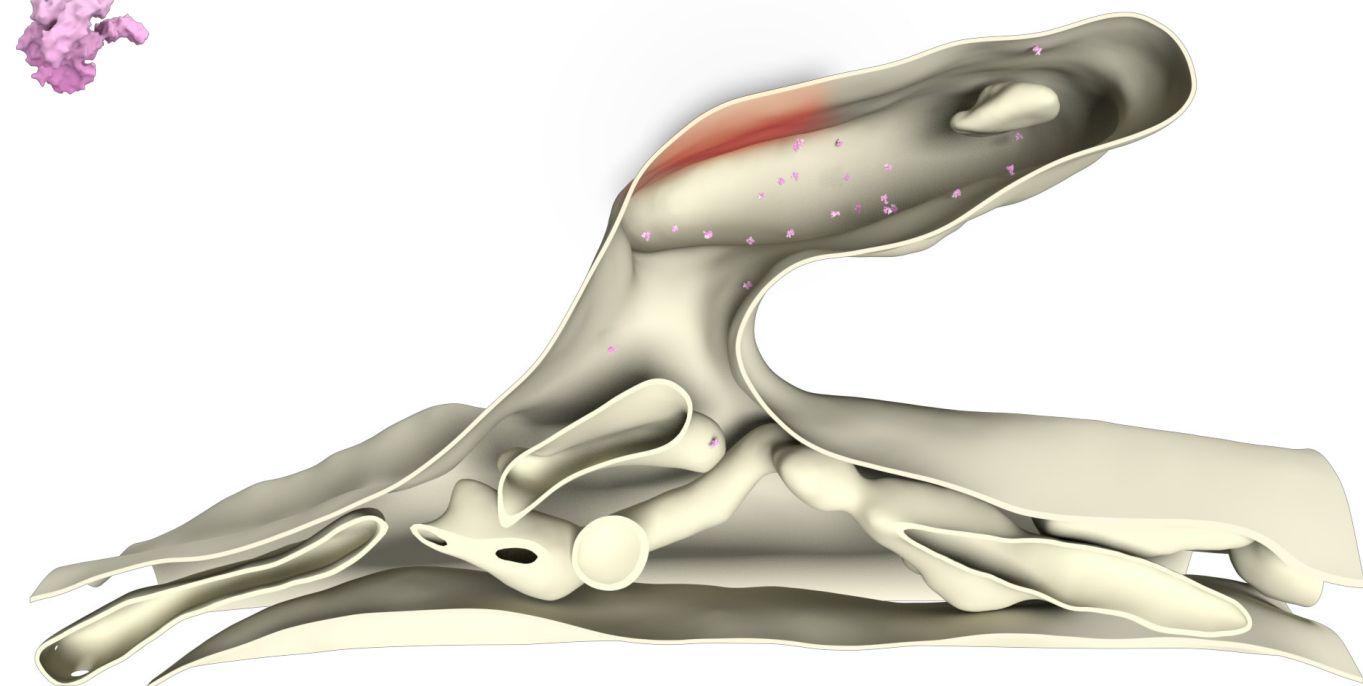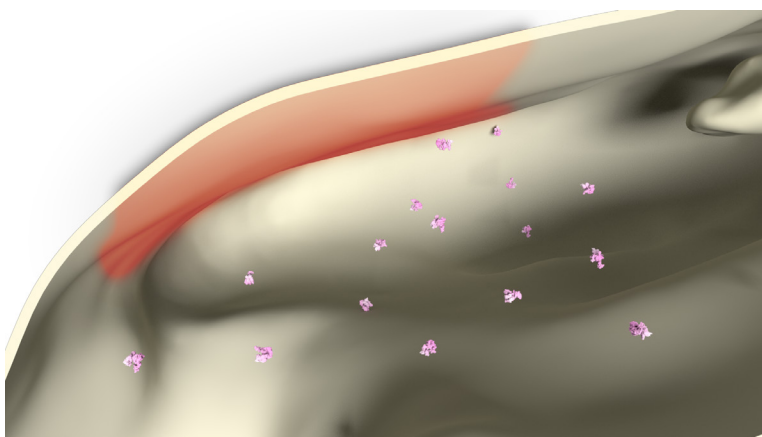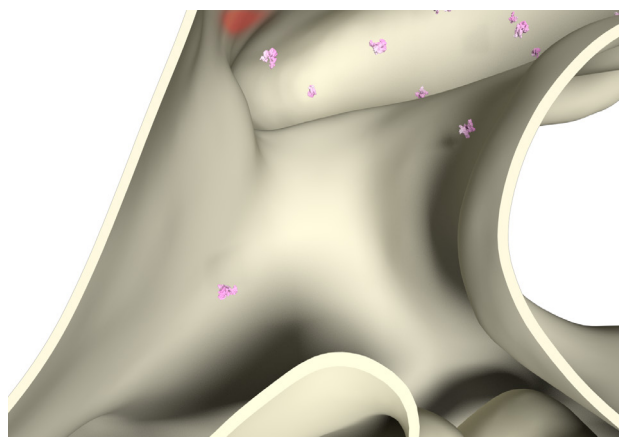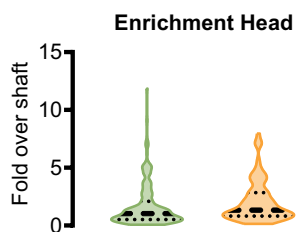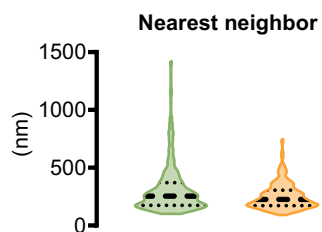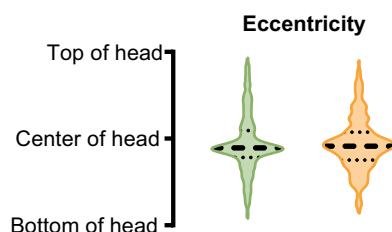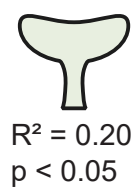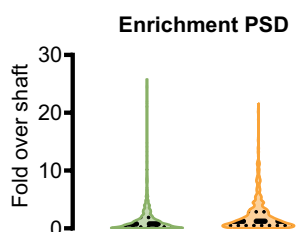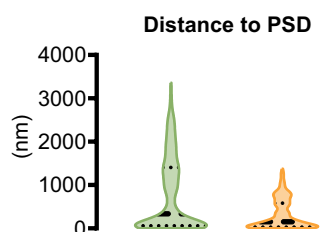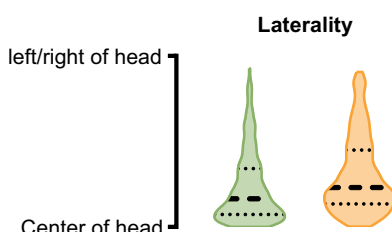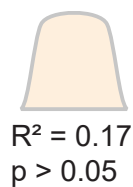

|          | Spine copy number | % of total protein | Molarity ( $\mu\text{M}$ ) | PSD copy number |
|----------|-------------------|--------------------|----------------------------|-----------------|
| Mushroom | $3.7 \pm 1.6$     | $0.0 \pm 0.0\%$    | $0.0 \pm 0.0$              | $0 \pm 0.0$     |
| Stubby   | $7.3 \pm 3.2$     | $0.0 \pm 0.0\%$    | $0.1 \pm 0.0$              | $1 \pm 0.4$     |

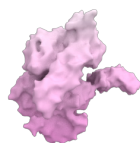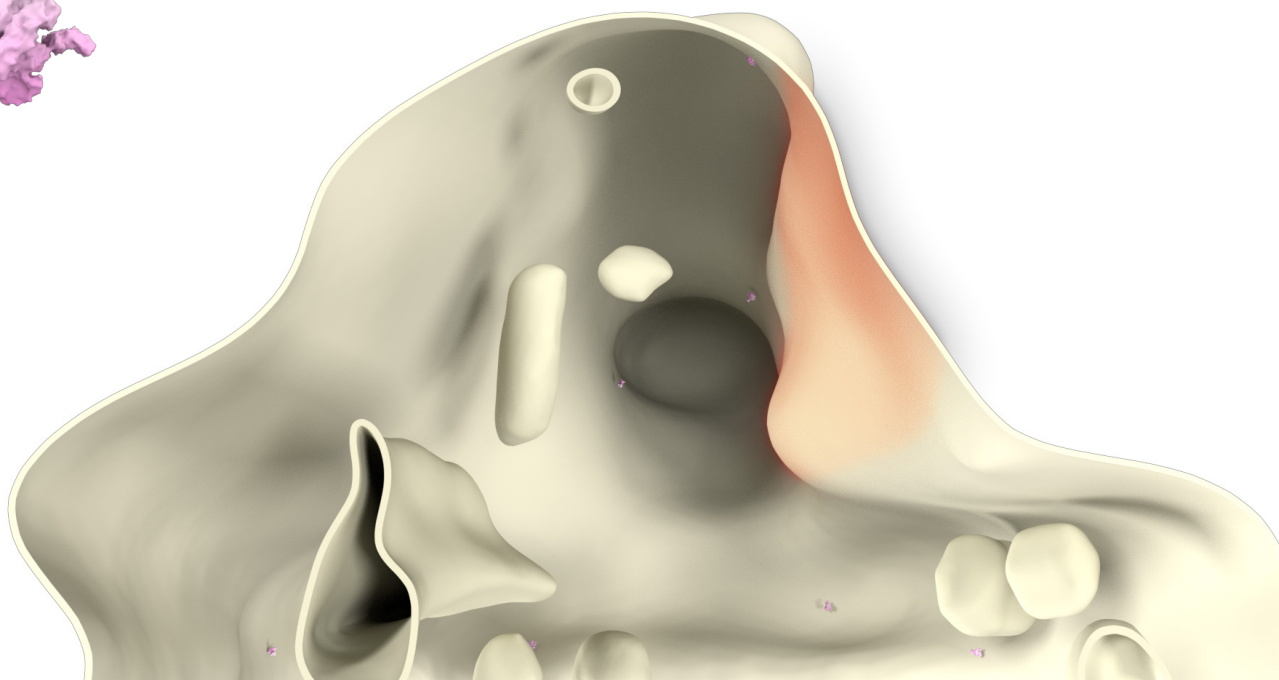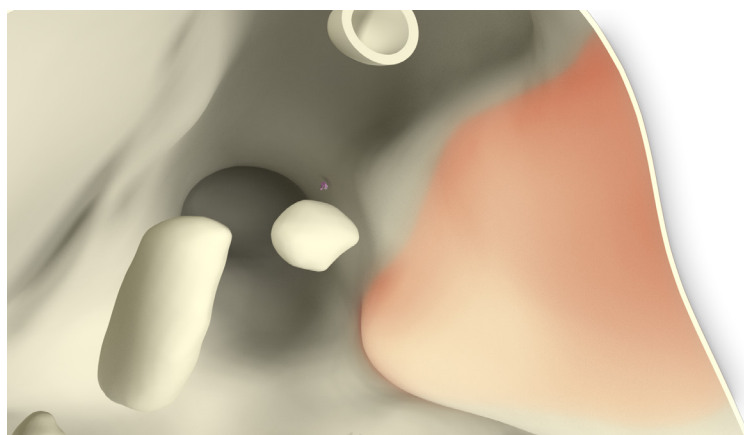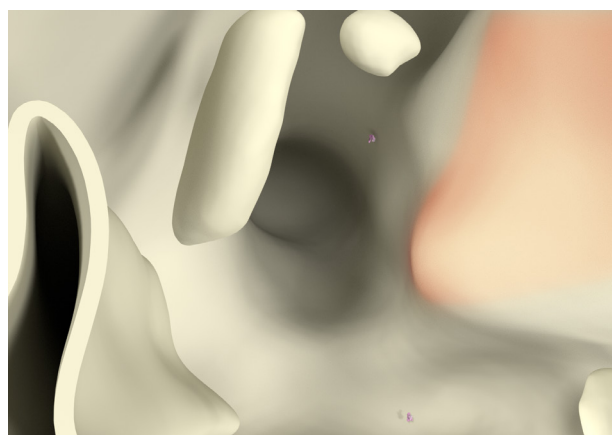

## References

**Antibody:** Novus Biologicals NBP1-76911

**PDB Identifier:** 4r0y

### Literature:

Boeckers et al., 1999a, J. Neurosci.

Kim et al., 1997, J. Cell. Biol.

MacGillavry et al., 2013, Neuron

Naisbitt et al., 1999, Neuron

Satoh et al., 1997, Genes Cells

Takeuchi et al., 1997, J. Biol. Chem.

Wu et al., 2000, EMBO J.

Yao, 1999, J. Biol. Chem.



## Dopamine Receptor D1 (Gene: Drd1, Uniprot ID: P18901)

**Known function:** Activation of Adenylyl cyclase, Enhances NMDAR response

**Known organization:** Transmembrane protein, Present in clusters, Predominantly on shaft and perisynaptic regions

**Known Interactions:** Dopamine Receptor D2, NMDA Receptors

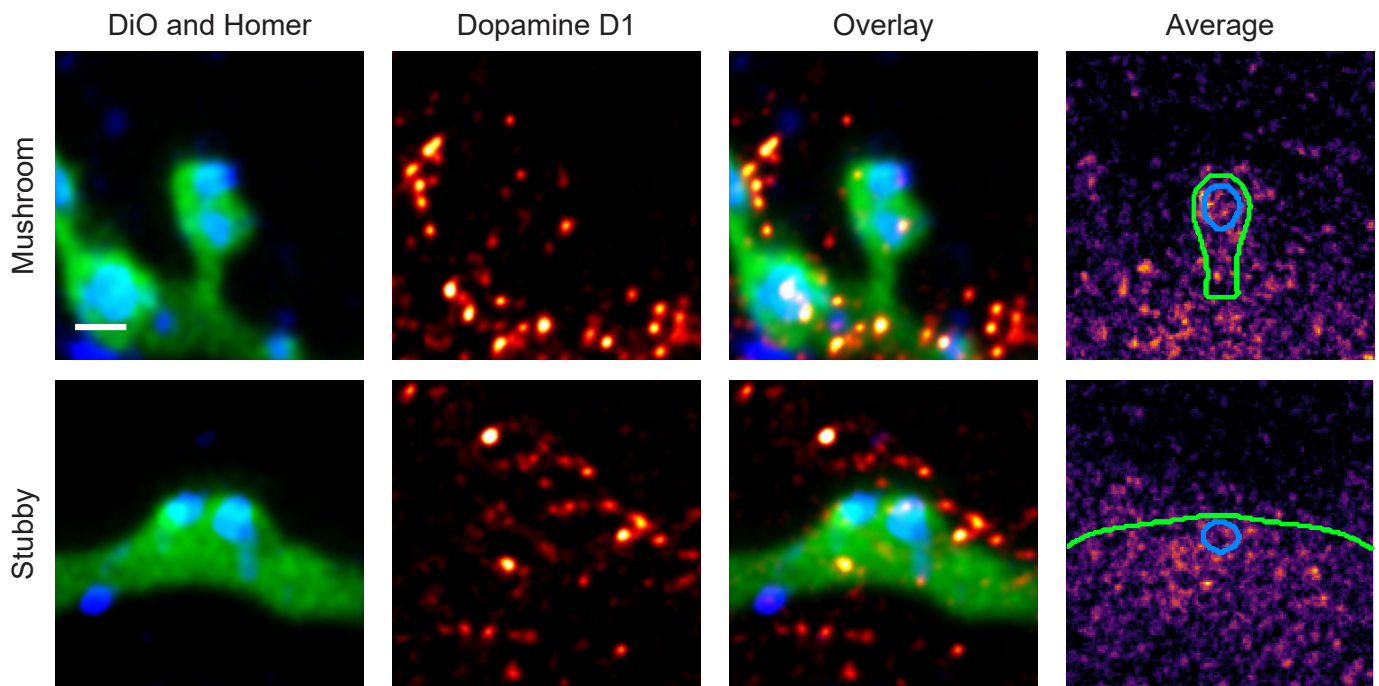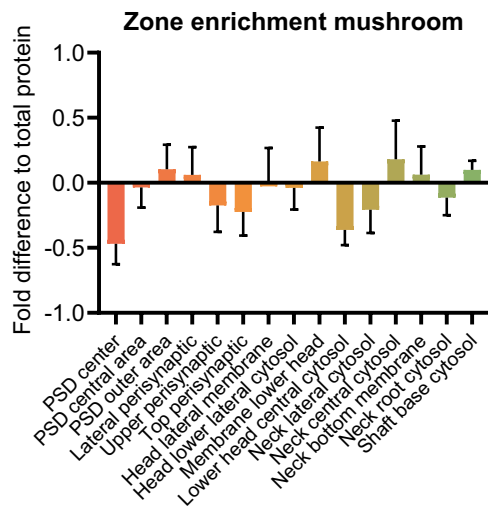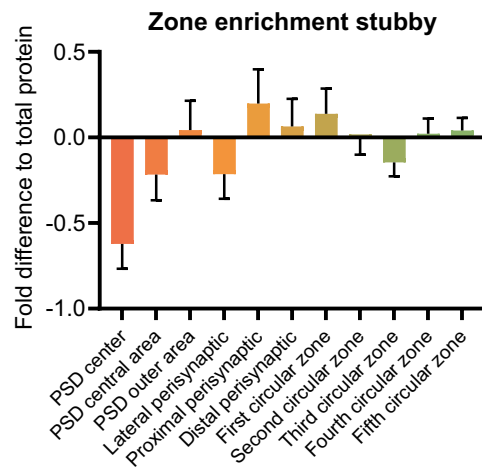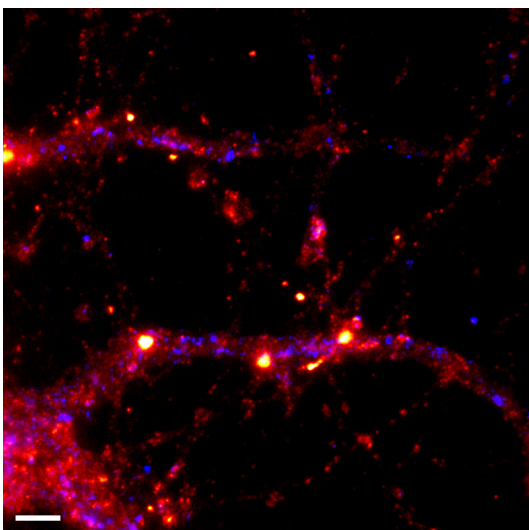

|                        |                      |              |
|------------------------|----------------------|--------------|
| Whole cell copy number | 1688583.2 ± 626867.3 |              |
| Spine copy number      | not detected         |              |
| Function               | Receptor             |              |
|                        | Mushroom             | Stubby       |
| Spine copy number      | not detected         | not detected |
| % of total protein     | not detected         | not detected |
| Molarity (μM)          | not detected         | not detected |
| PSD copy number        | not detected         | not detected |
| % in PSD               | not detected         | not detected |

|          | Spine copy number | % of total protein | Molarity ( $\mu\text{M}$ ) | PSD copy number |
|----------|-------------------|--------------------|----------------------------|-----------------|
| Mushroom | not detected      | not detected       | not detected               | not detected    |
| Stubby   | not detected      | not detected       | not detected               | not detected    |

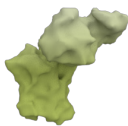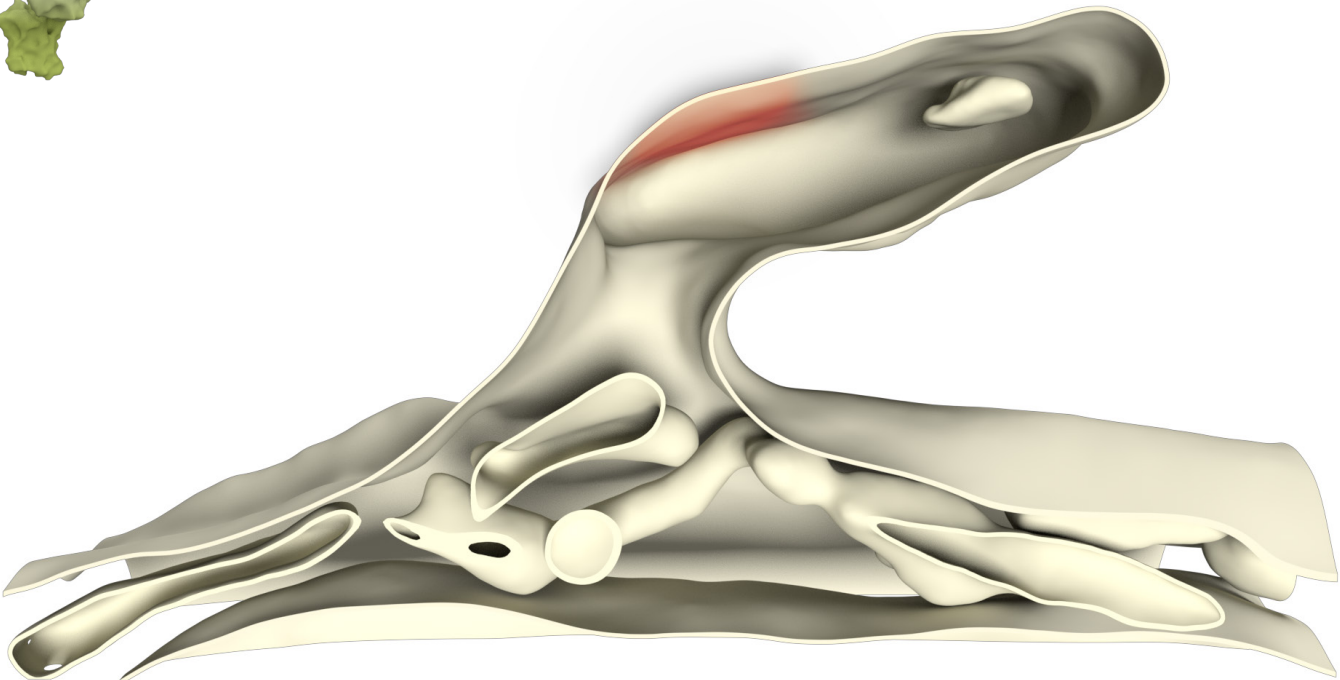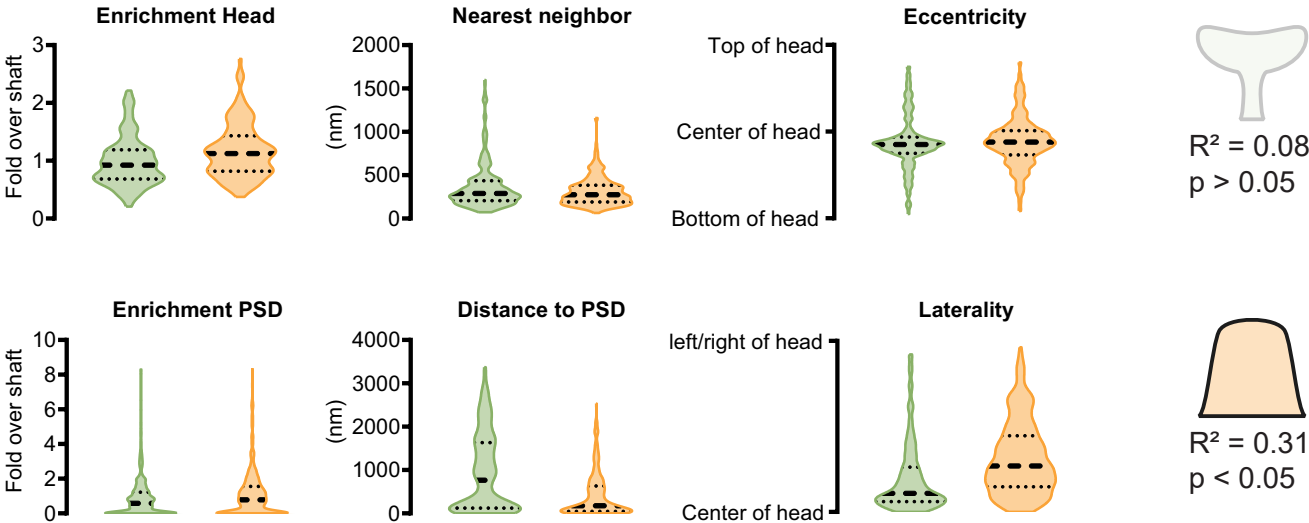

|          | Spine copy number | % of total protein | Molarity ( $\mu\text{M}$ ) | PSD copy number |
|----------|-------------------|--------------------|----------------------------|-----------------|
| Mushroom | not detected      | not detected       | not detected               | not detected    |
| Stubby   | not detected      | not detected       | not detected               | not detected    |

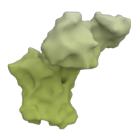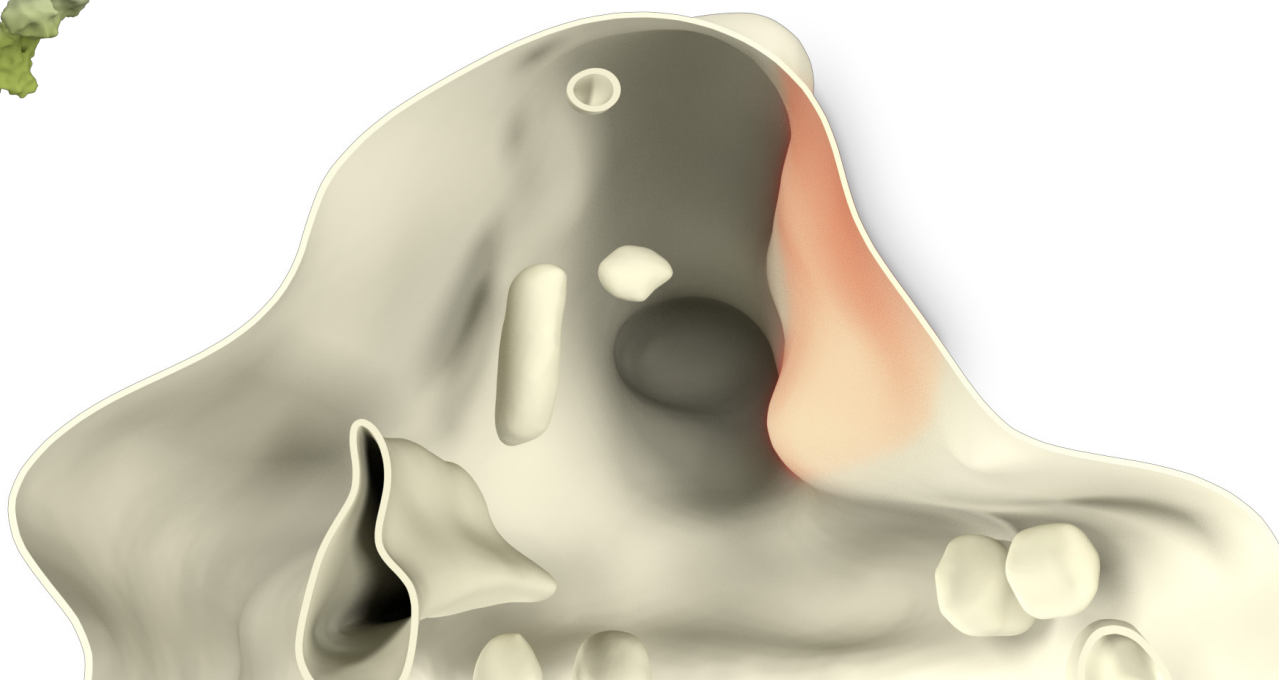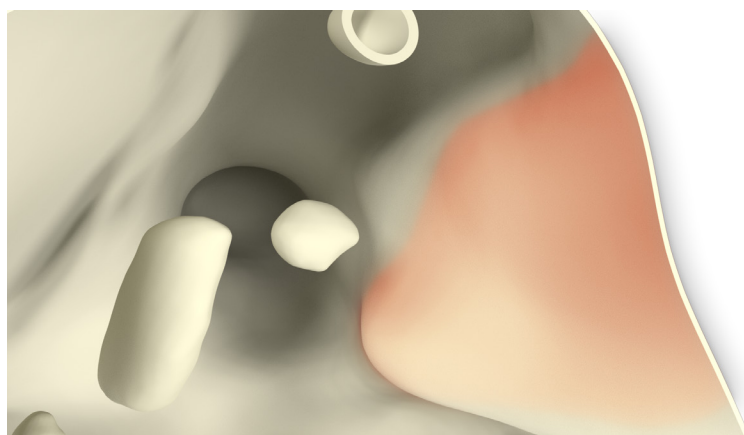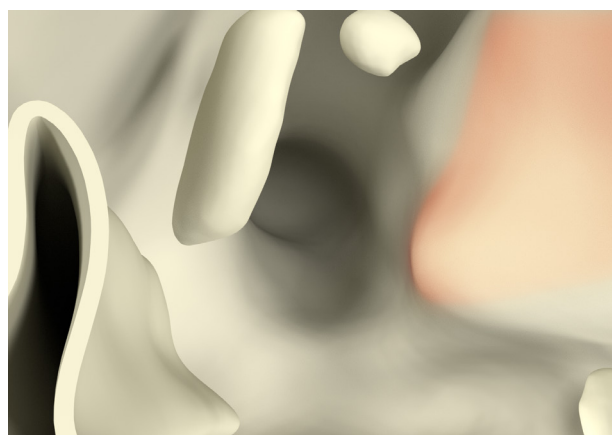

## References

**Antibody:** Abcam ab40653

**PDB Identifier:** 6cm4

### Literature:

Agnati et al., 2016, Rev. Neurosci.

Beaulieu et al., 2015, Br. J. Pharmacol.

Ladepeche et al., 2013a, PLoS One

Ladepeche et al., 2013b, Proc. Natl. Acad. Sci. USA

Lee et al., 2002, Cell

Pei, 2004, J. Neurosci.



Dopamine Receptor D2 (Gene: Drd2, Uniprot ID: P61169)

**Known function:** Inhibition of Adenylyl cyclase, Decreases NMDAR response and GluR1 insertion

**Known organization:** Transmembrane protein, Close to or within PSD

**Known Interactions:** Other Dopamine receptor isoforms, NMDA receptors

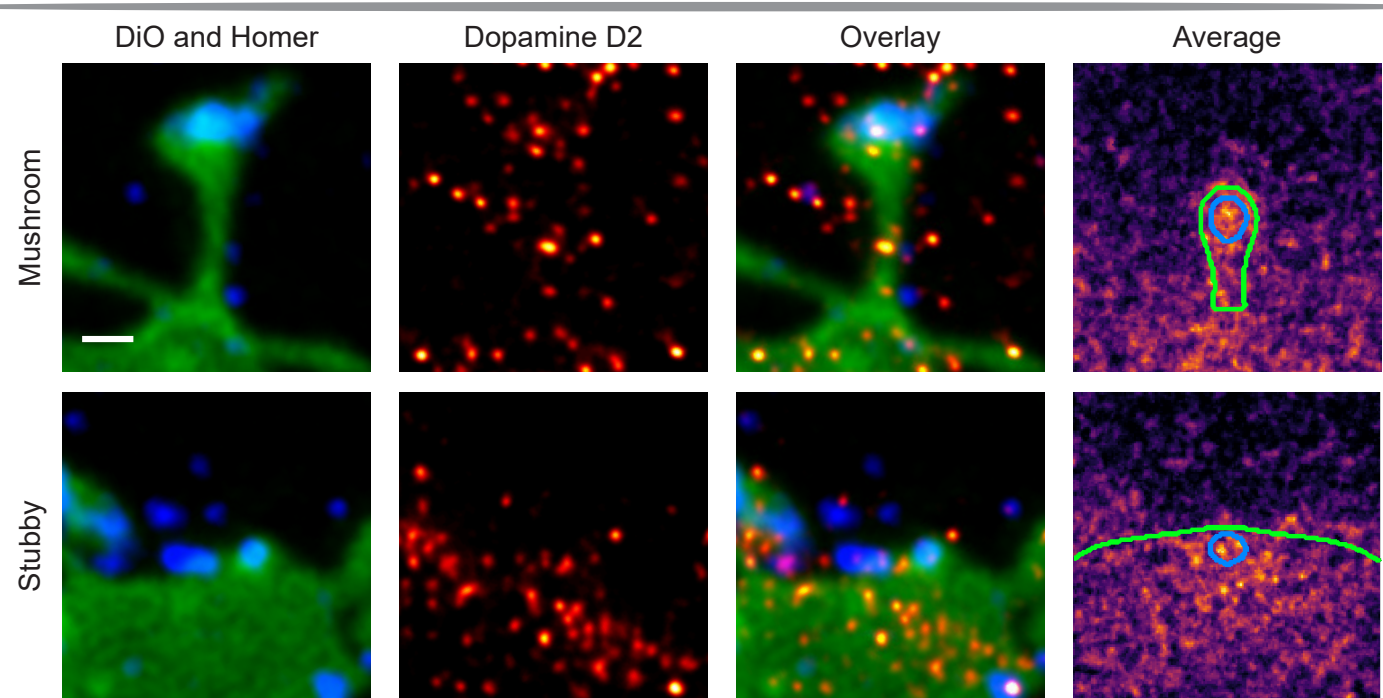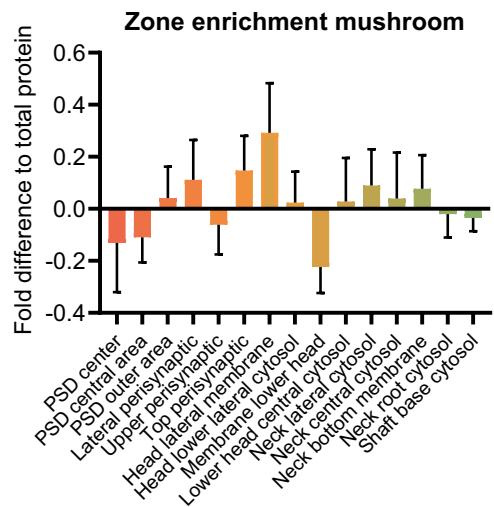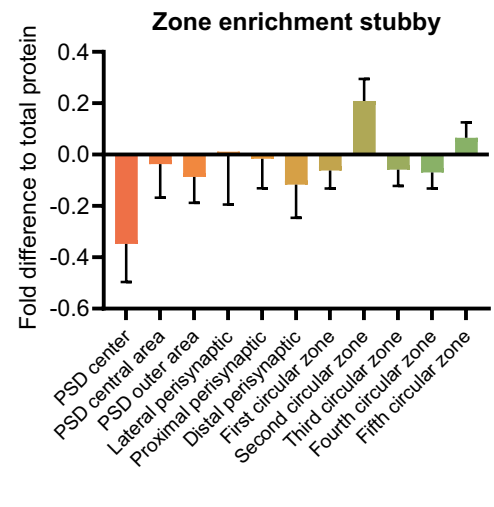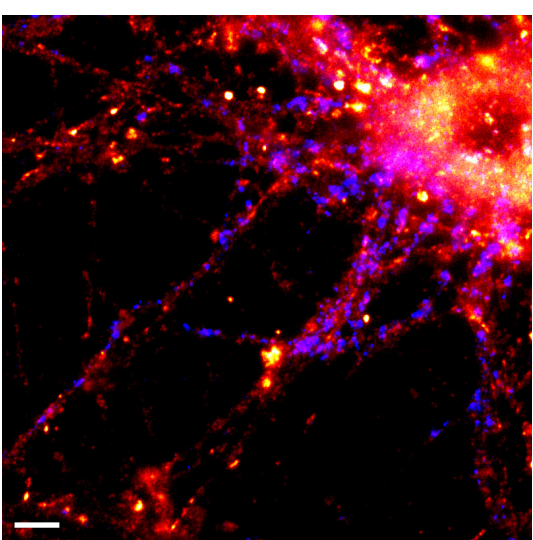

|                        |                     |             |
|------------------------|---------------------|-------------|
| Whole cell copy number | 618111.3 ± 168121.4 |             |
| Spine copy number      | 66.9 ± 24.1         |             |
| Function               | Receptor            |             |
|                        | Mushroom            | Stubby      |
| Spine copy number      | 65.8 ± 23.7         | 72.2 ± 26.0 |
| % of total protein     | 0.0 ± 0.0%          | 0.0 ± 0.0%  |
| Molarity (μM)          | 0.8 ± 0.3           | 0.7 ± 0.2   |
| PSD copy number        | 9 ± 3.2             | 6 ± 2.2     |
| % in PSD               | 13.7 ± 4.9%         | 8.3 ± 3.0%  |

|          | Spine copy number | % of total protein | Molarity ( $\mu\text{M}$ ) | PSD copy number |
|----------|-------------------|--------------------|----------------------------|-----------------|
| Mushroom | $65.8 \pm 23.7$   | $0.0 \pm 0.0\%$    | $0.8 \pm 0.3$              | $9 \pm 3.2$     |
| Stubby   | $72.2 \pm 26.0$   | $0.0 \pm 0.0\%$    | $0.7 \pm 0.2$              | $6 \pm 2.2$     |

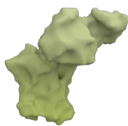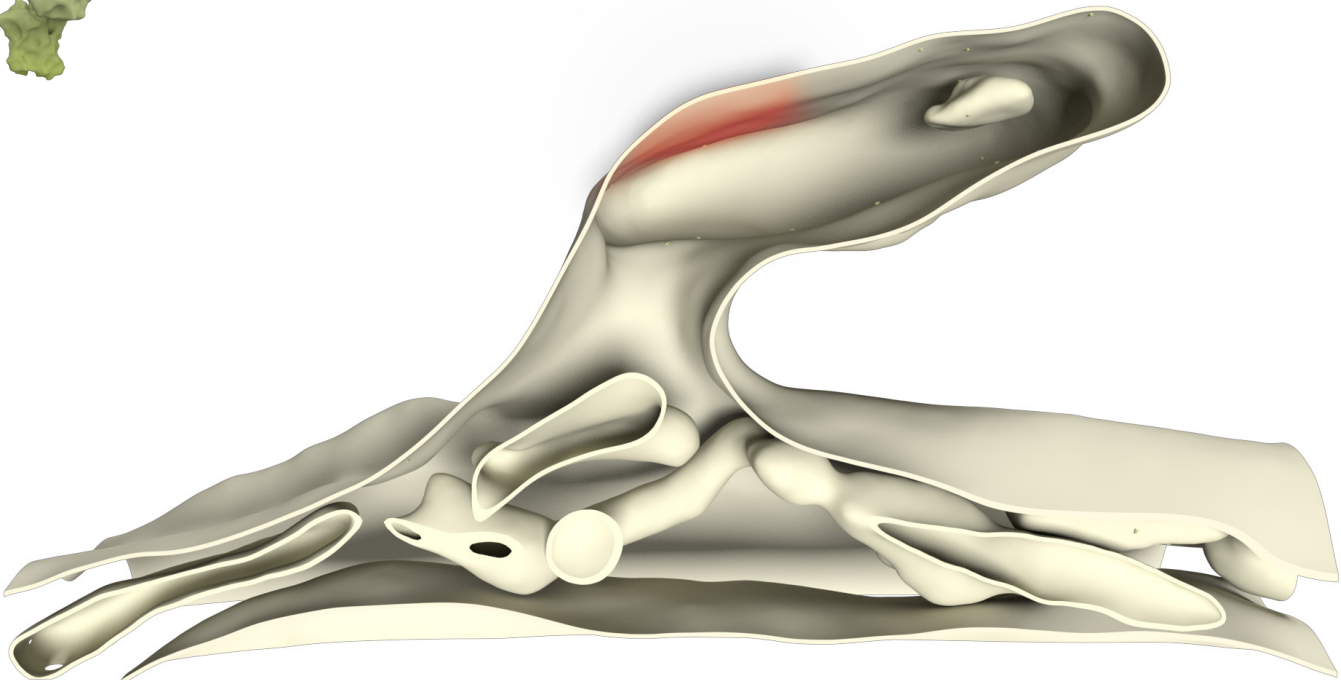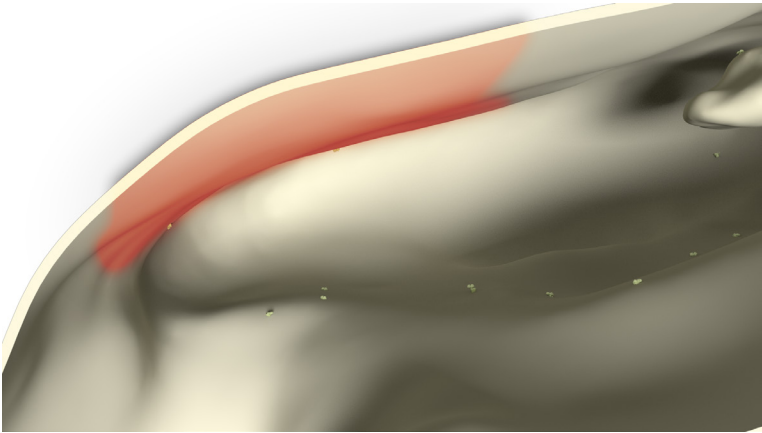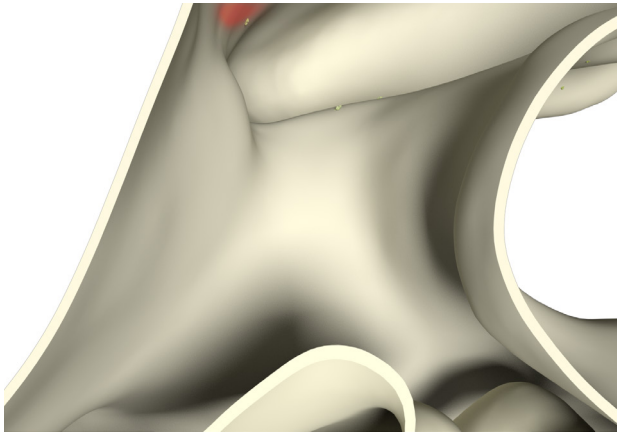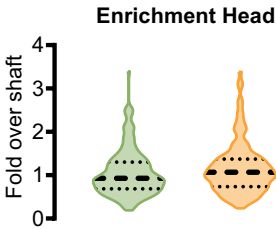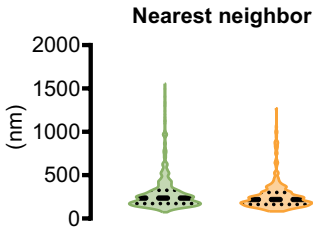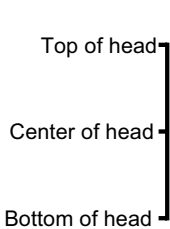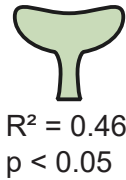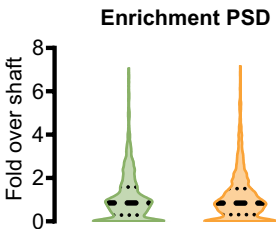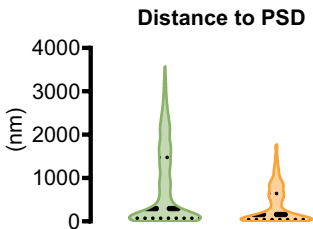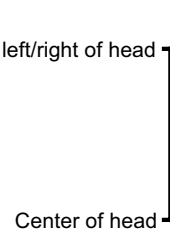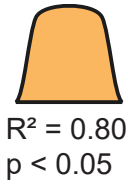

|          | Spine copy number | % of total protein | Molarity ( $\mu\text{M}$ ) | PSD copy number |
|----------|-------------------|--------------------|----------------------------|-----------------|
| Mushroom | $65.8 \pm 23.7$   | $0.0 \pm 0.0\%$    | $0.8 \pm 0.3$              | $9 \pm 3.2$     |
| Stubby   | $72.2 \pm 26.0$   | $0.0 \pm 0.0\%$    | $0.7 \pm 0.2$              | $6 \pm 2.2$     |

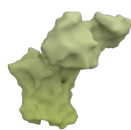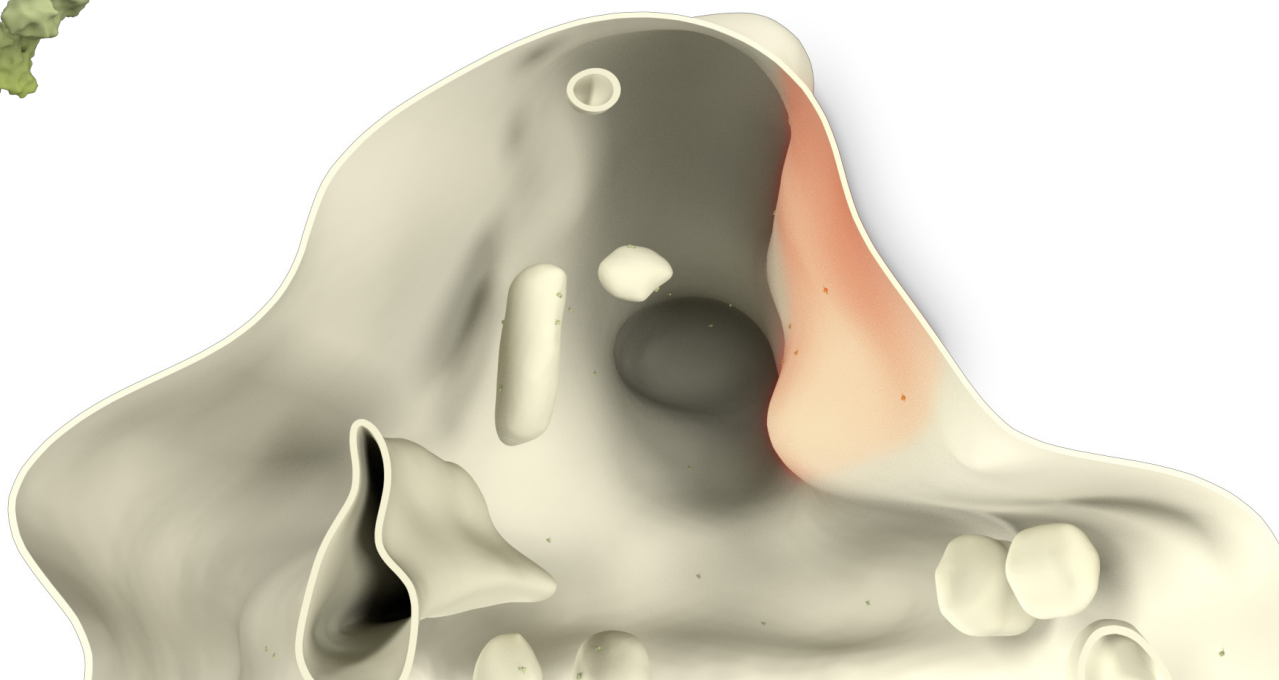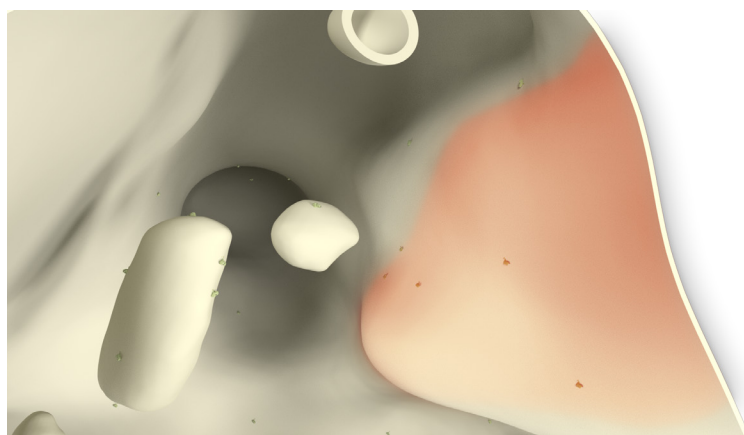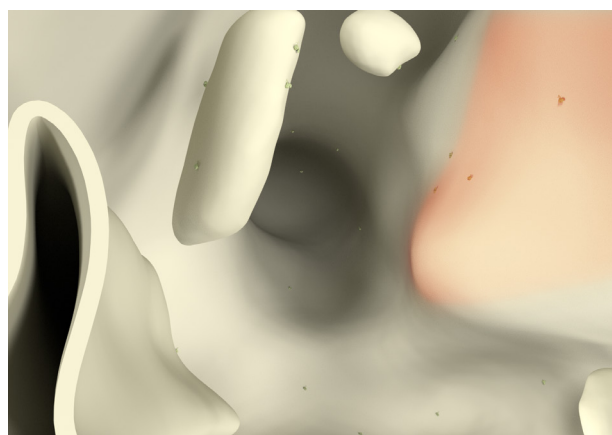

## References

**Antibody:** Merck Millipore AB5084P

**PDB Identifier:** 6cm4

### Literature:

Agnati et al., 2016, Rev. Neurosci.

Beaulieu et al., 2015, Br. J. Pharmacol.

Ladepeche et al., 2013a, PLoS One

Ladepeche et al., 2013b, Proc. Natl. Acad. Sci. USA

Liu et al., 2006, Neuron

Pei, 2004, J. Neurosci.

Sun et al., 2005, J. Neurosci.



Drebrin (Gene: Dbn1, Uniprot ID: Q07266)

Known function: Stabilizes Actin, Regulates microtubule entry into spines

Known organization: Cytosolic

Known Interactions: Actin

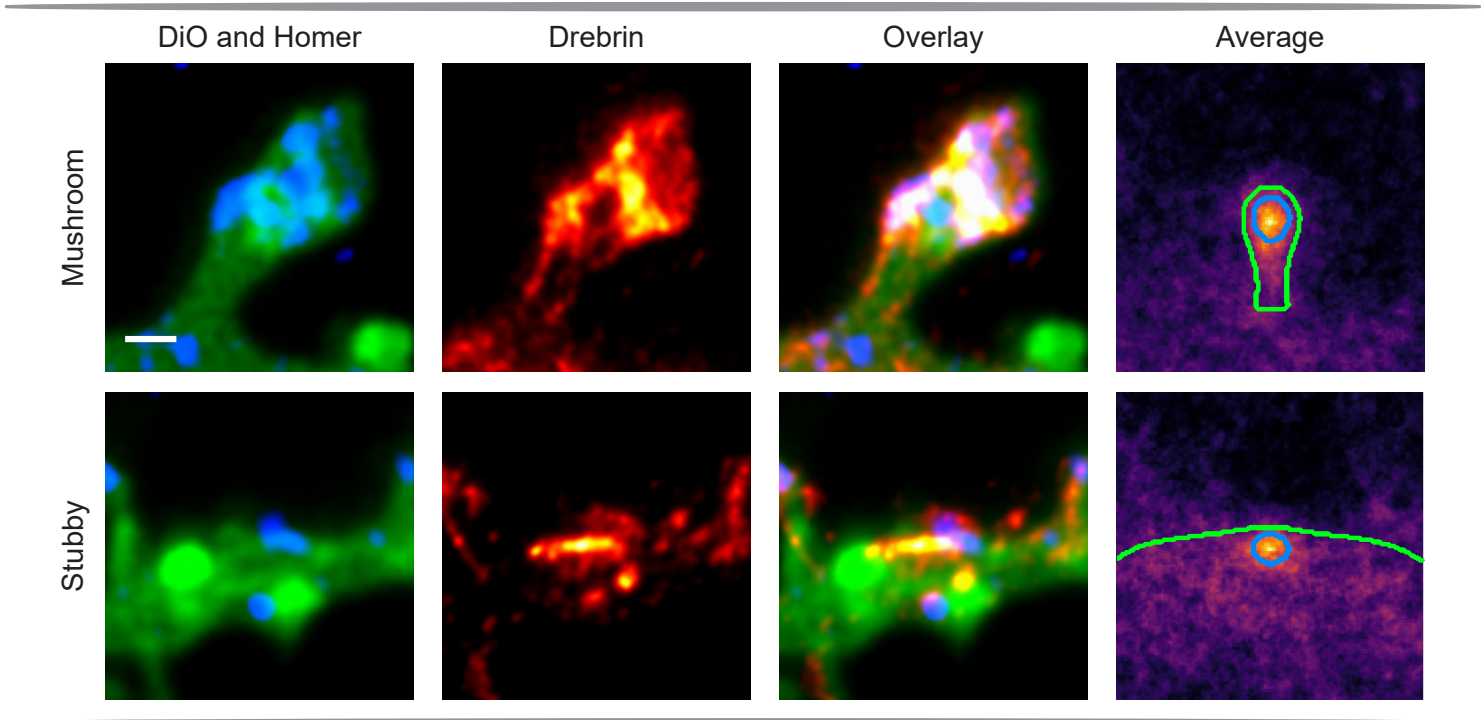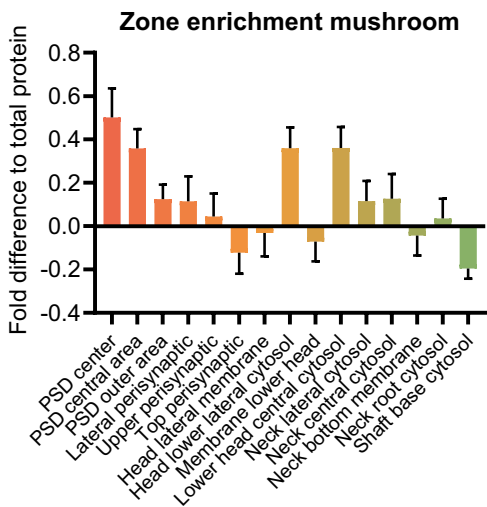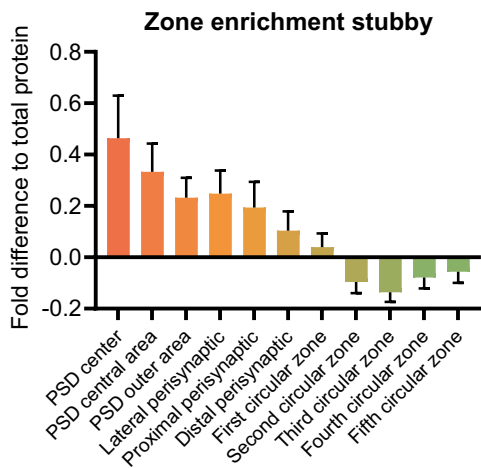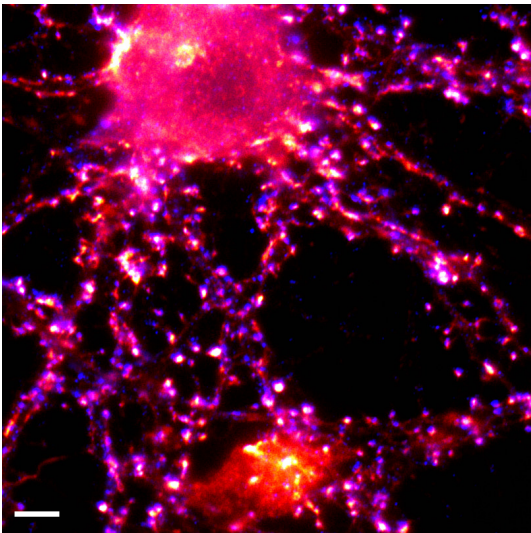

|                        |                     |                |
|------------------------|---------------------|----------------|
| Whole cell copy number | 6331446.3 ± 88419.8 |                |
| Spine copy number      | 5598.9 ± 624.1      |                |
| Function               | Cytoskeleton        |                |
|                        | Mushroom            | Stubby         |
| Spine copy number      | 5459.6 ± 608.5      | 6210.3 ± 692.2 |
| % of total protein     | 2.1 ± 0.2%          | 2.0 ± 0.2%     |
| Molarity (μM)          | 69.3 ± 7.7          | 58.7 ± 6.5     |
| PSD copy number        | 2072 ± 230.9        | 2513 ± 280.1   |
| % in PSD               | 38.0 ± 4.2%         | 40.5 ± 4.5%    |

|          | Spine copy number  | % of total protein | Molarity ( $\mu\text{M}$ ) | PSD copy number  |
|----------|--------------------|--------------------|----------------------------|------------------|
| Mushroom | $5459.6 \pm 608.5$ | $2.1 \pm 0.2\%$    | $69.3 \pm 7.7$             | $2072 \pm 230.9$ |
| Stubby   | $6210.3 \pm 692.2$ | $2.0 \pm 0.2\%$    | $58.7 \pm 6.5$             | $2513 \pm 280.1$ |

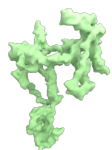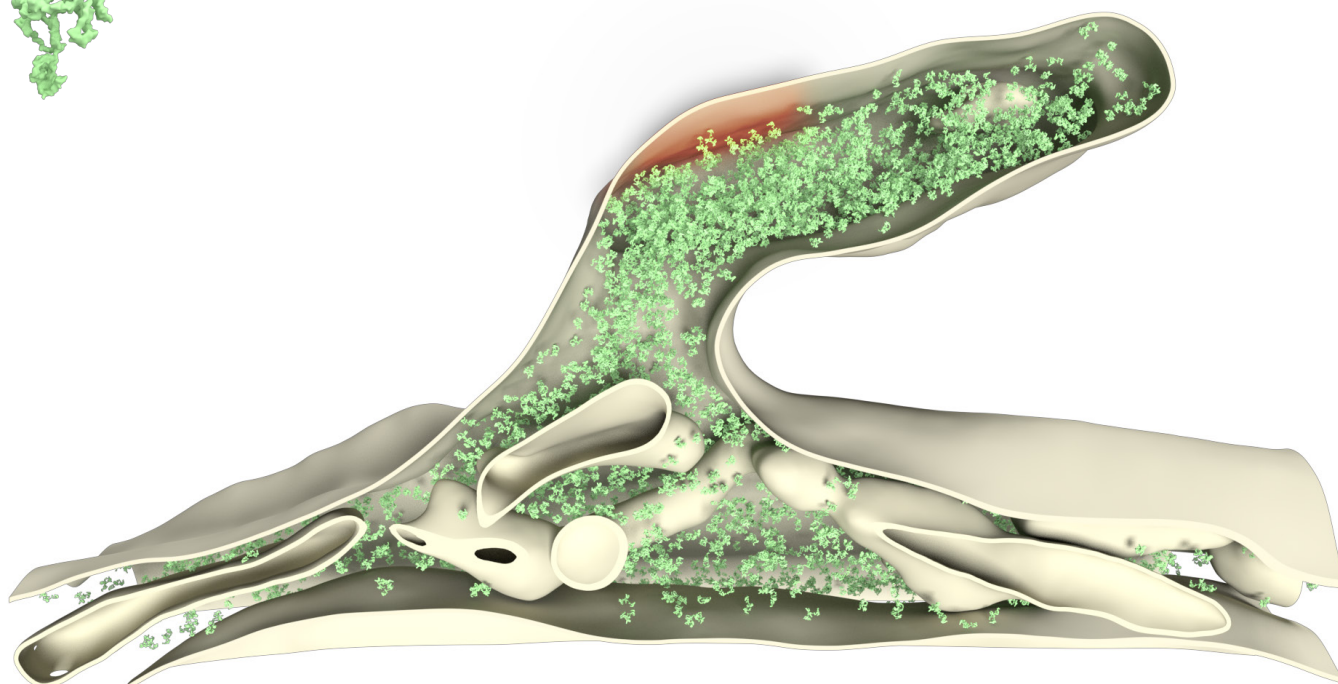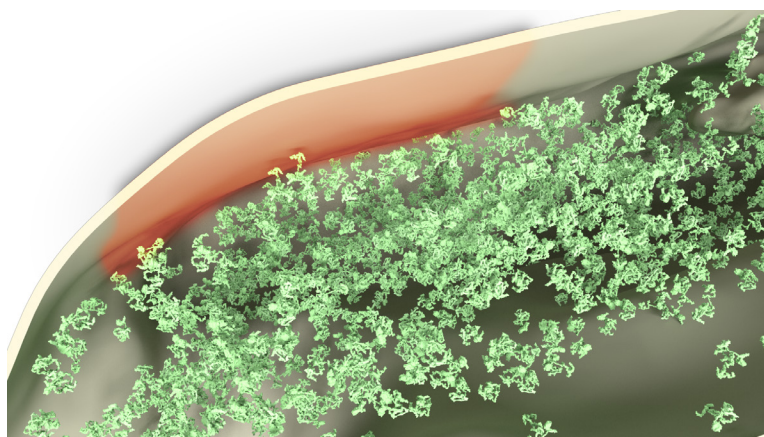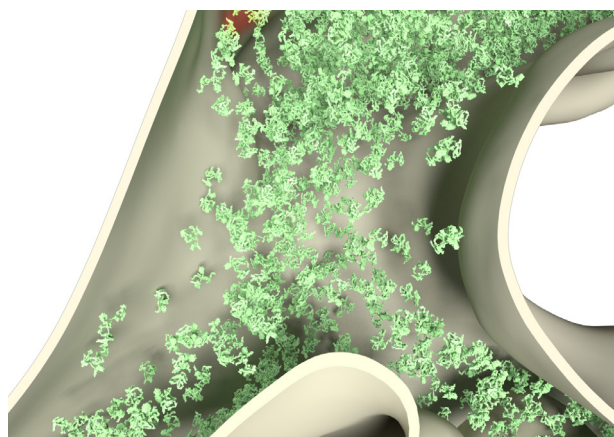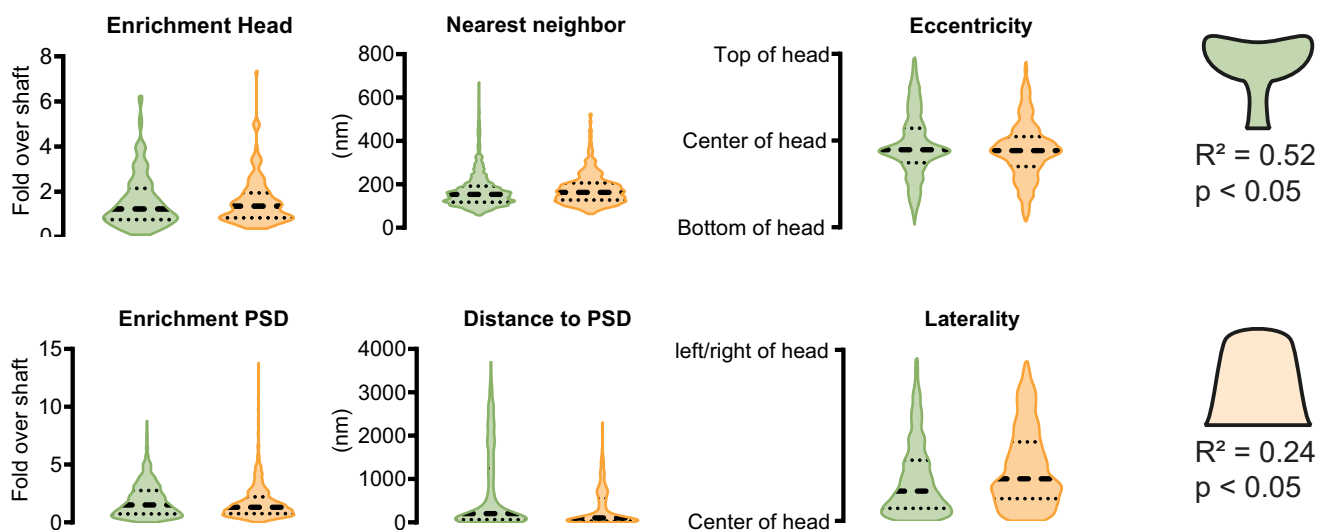



|          | Spine copy number  | % of total protein | Molarity ( $\mu\text{M}$ ) | PSD copy number  |
|----------|--------------------|--------------------|----------------------------|------------------|
| Mushroom | $5459.6 \pm 608.5$ | $2.1 \pm 0.2\%$    | $69.3 \pm 7.7$             | $2072 \pm 230.9$ |
| Stubby   | $6210.3 \pm 692.2$ | $2.0 \pm 0.2\%$    | $58.7 \pm 6.5$             | $2513 \pm 280.1$ |

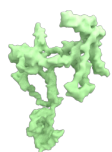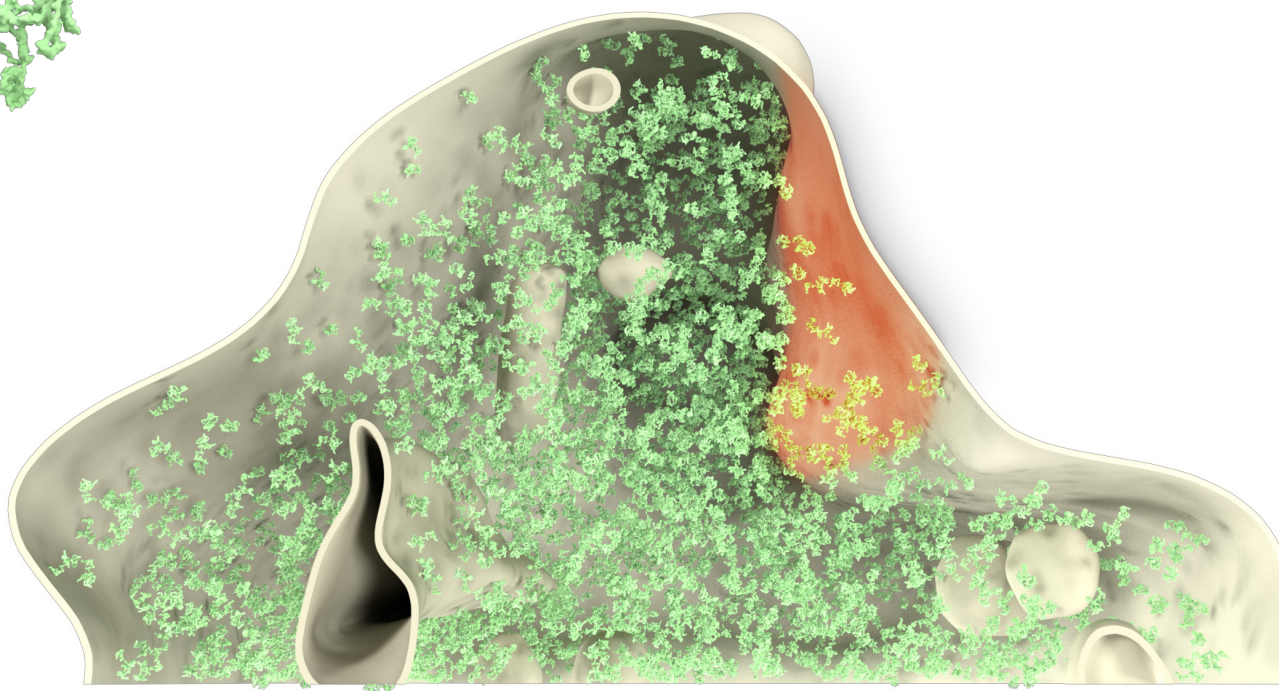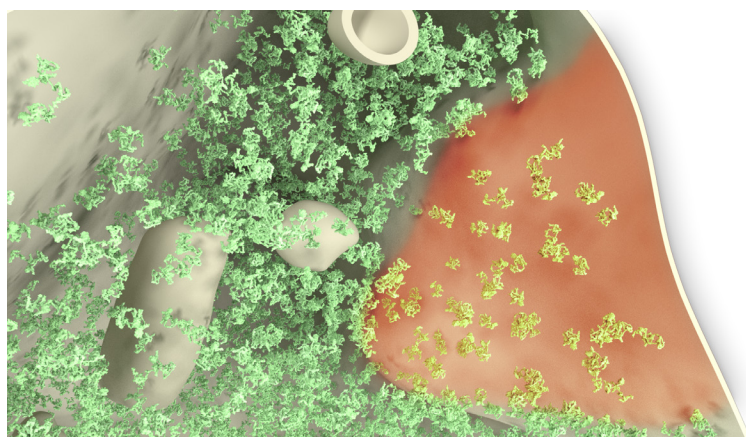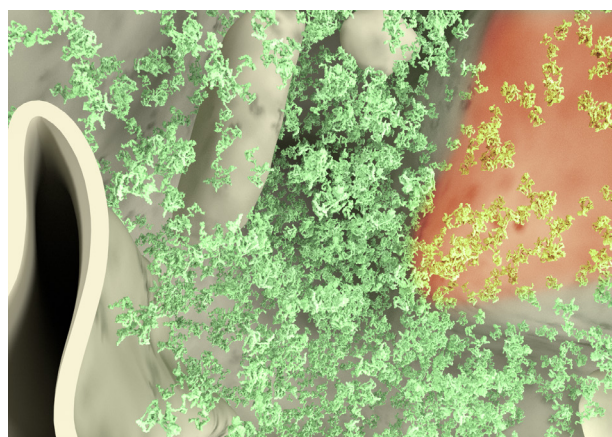

## References

**Antibody:** Novus Biologicals NB100-1951

**PDB Identifier:** 5y1z

### Literature:

Hayashi et al., 1996, J. Neurosci.

Ishikawa et al., 1994, J. Biol. Chem.

Merriam et al., 2013, J. Neurosci.

Mikati et al., 2013, J. Biol. Chem.



## Dynamin1-3 (Genes: Dnm1, Dnm2, Dnm3, Uniprot IDs: P21575, P39052, Q08877)

**Known function:** Membrane fission in endocytosis, AMPAR and NMDAR endocytosis

**Known organization:** Cytosolic, Forms dimers and helices

**Known Interactions:** Homer and Shank proteins, mGluR5

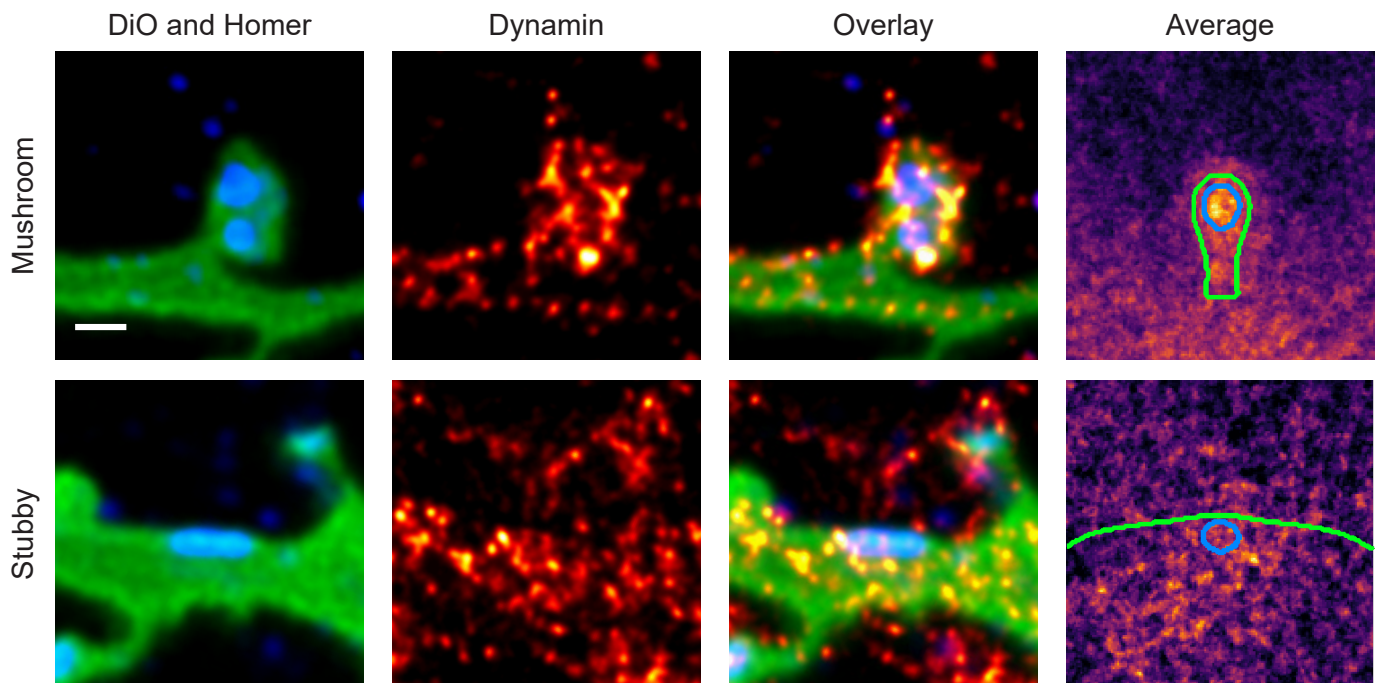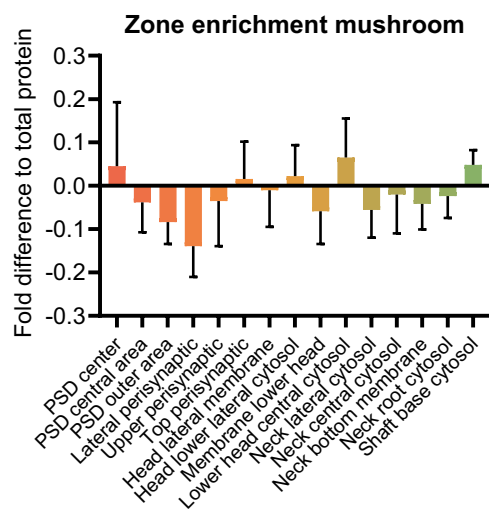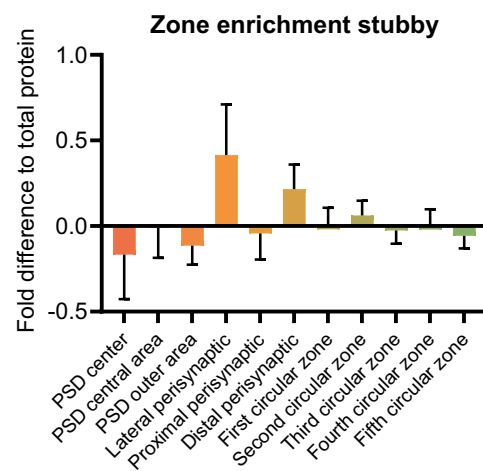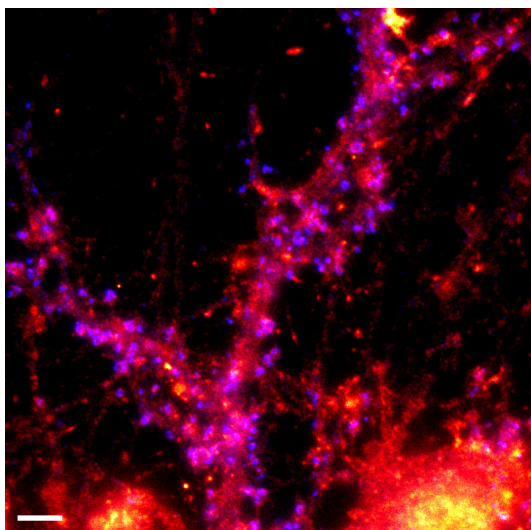

|                        |                            |                |
|------------------------|----------------------------|----------------|
| Whole cell copy number | 6435888.0 ± 251140.2       |                |
| Spine copy number      | 1495.6 ± 299.5             |                |
| Function               | Exo-/Endocytosis cofactors |                |
|                        | Mushroom                   | Stubby         |
| Spine copy number      | 1355.2 ± 271.3             | 1525.6 ± 305.5 |
| % of total protein     | 0.6 ± 0.1%                 | 0.6 ± 0.1%     |
| Molarity (μM)          | 17.2 ± 3.4                 | 14.4 ± 2.9     |
| PSD copy number        | 394 ± 78.9                 | 121 ± 24.2     |
| % in PSD               | 29.1 ± 5.8%                | 7.9 ± 1.6%     |

|          | Spine copy number  | % of total protein | Molarity ( $\mu\text{M}$ ) | PSD copy number |
|----------|--------------------|--------------------|----------------------------|-----------------|
| Mushroom | $1355.2 \pm 271.3$ | $0.6 \pm 0.1\%$    | $17.2 \pm 3.4$             | $394 \pm 78.9$  |
| Stubby   | $1525.6 \pm 305.5$ | $0.6 \pm 0.1\%$    | $14.4 \pm 2.9$             | $121 \pm 24.2$  |

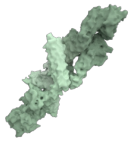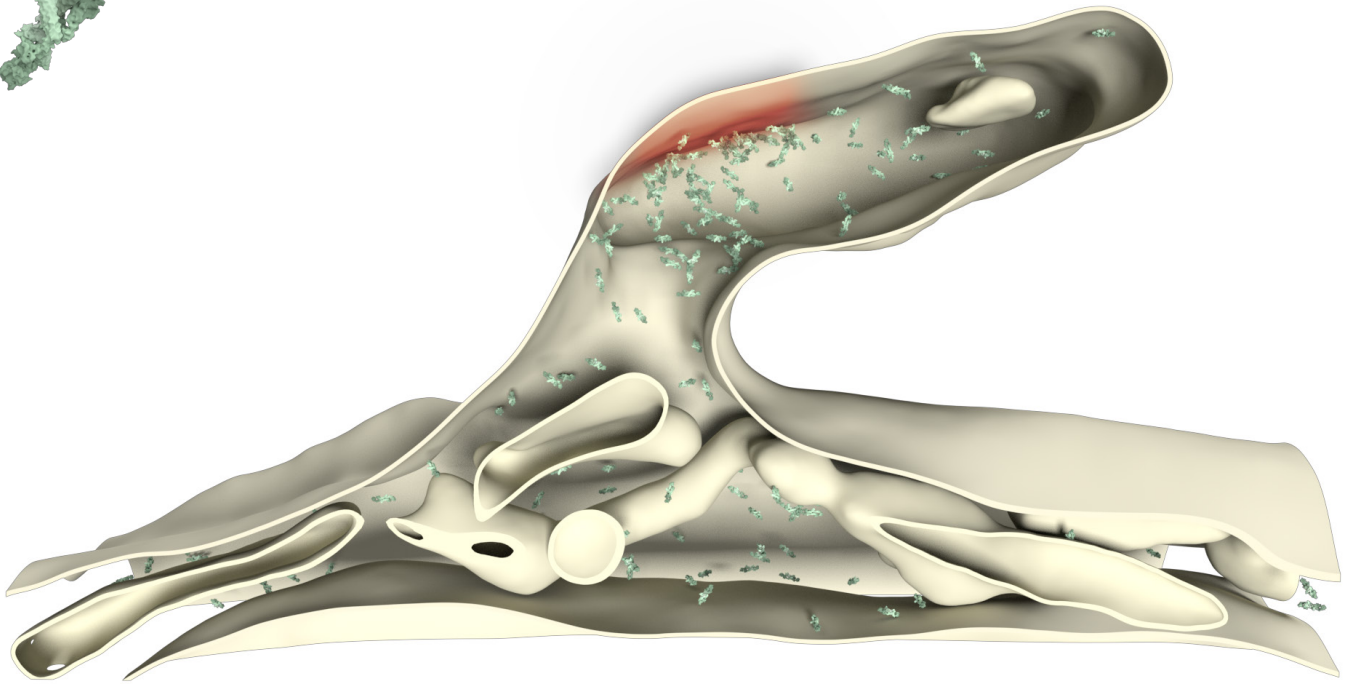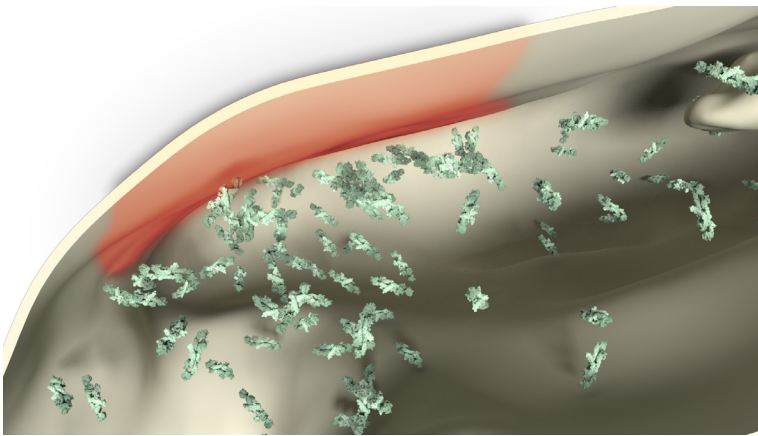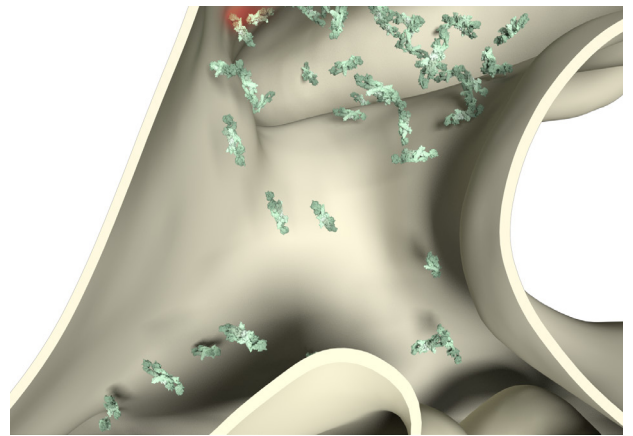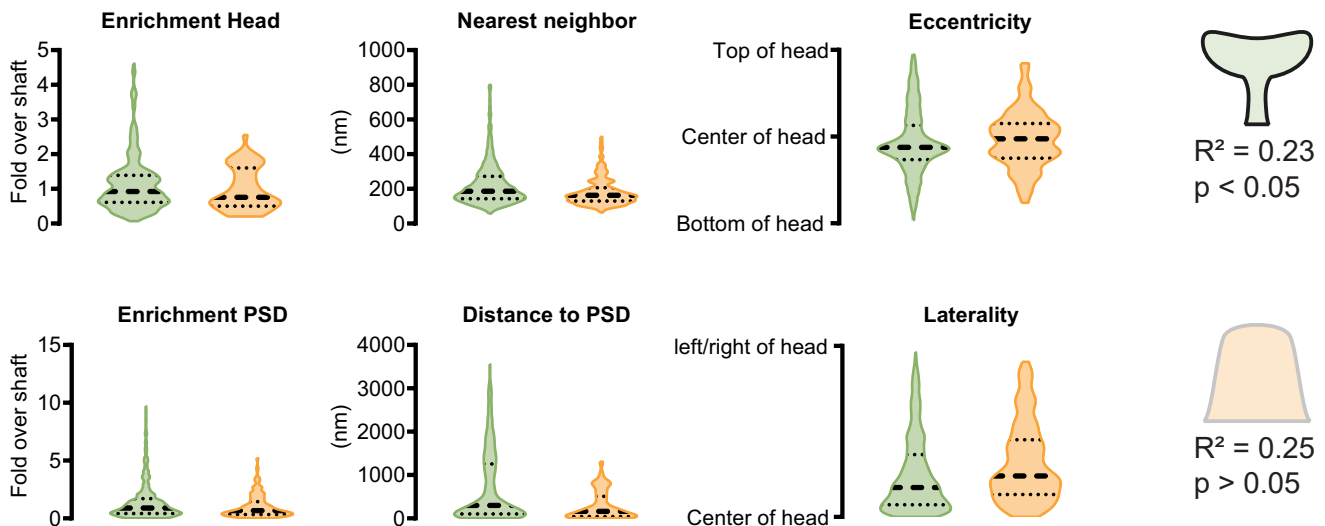

|          | Spine copy number  | % of total protein | Molarity ( $\mu\text{M}$ ) | PSD copy number |
|----------|--------------------|--------------------|----------------------------|-----------------|
| Mushroom | $1355.2 \pm 271.3$ | $0.6 \pm 0.1\%$    | $17.2 \pm 3.4$             | $394 \pm 78.9$  |
| Stubby   | $1525.6 \pm 305.5$ | $0.6 \pm 0.1\%$    | $14.4 \pm 2.9$             | $121 \pm 24.2$  |

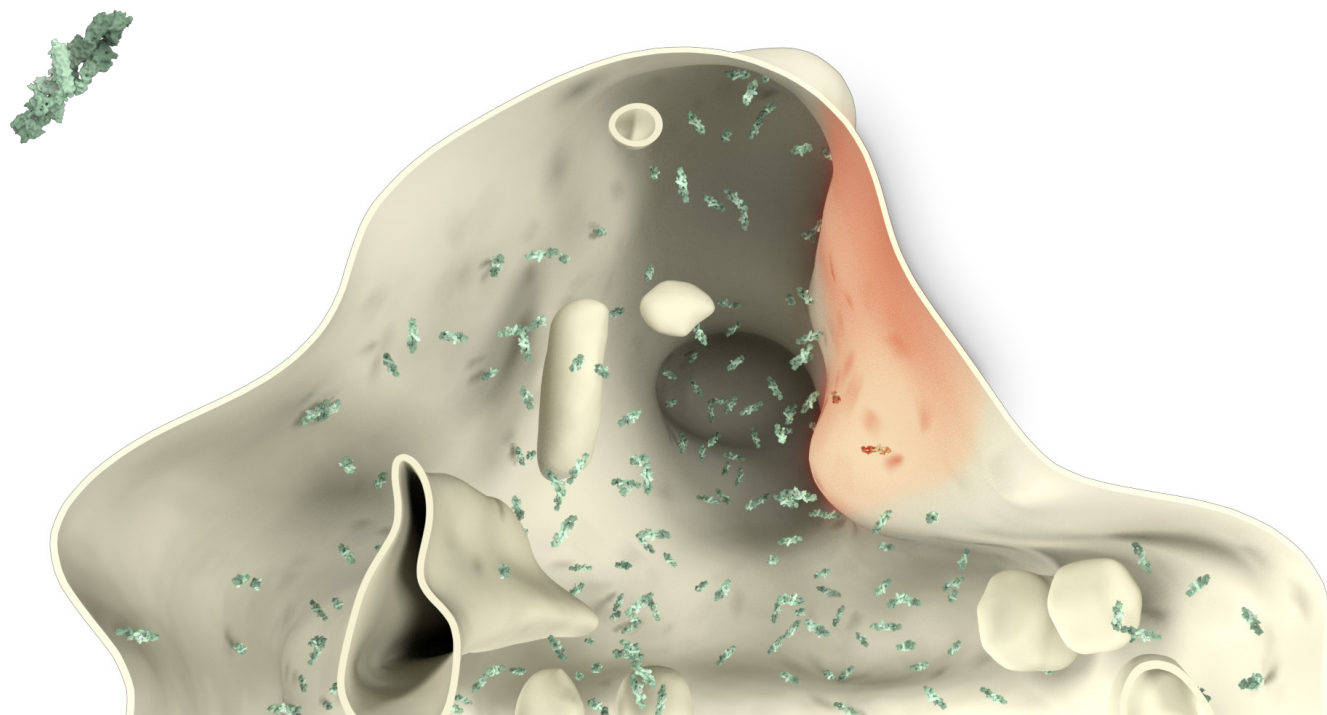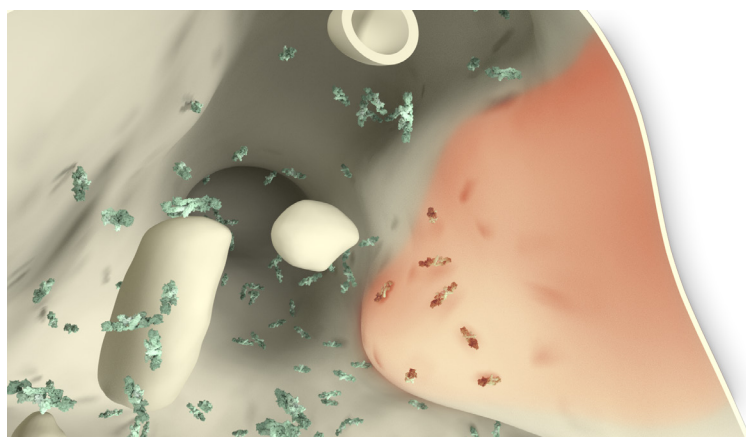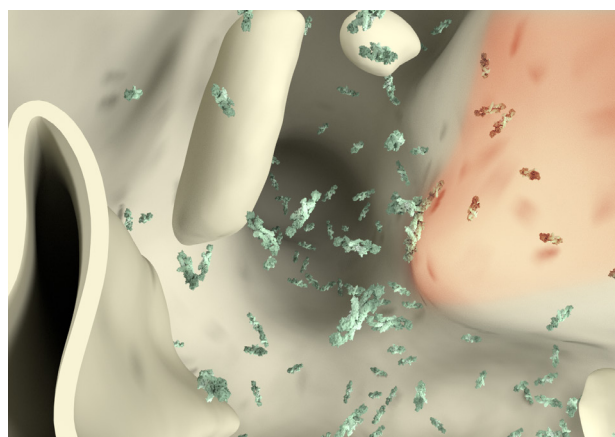

## References

**Antibody:** BD Biosciences 610245

**PDB Identifier:** 5a3f

### Literature:

Carroll et al., 1999, Proc. Natl. Acad. Sci. U S A

Damke et al., 1994, J. Cell. Biol.

Faelber et al., 2011, Nature

Gray et al., 2003, Curr. Biol.

Lu et al., 2007, Neuron

Pérez-Otaño et al., 2006, Nat. Neurosci.

Raimondi et al., 2011, Neuron

Takei et al., 1996, J. Cell. Biol.



ERp72 (ERp70, CaBP2, Gene: Pdia4, Uniprot ID: P38659)

Known function: ER-resident chaperone, Isomerizes disulfide bonds

Known organization: ER lumen

Known Interactions: None

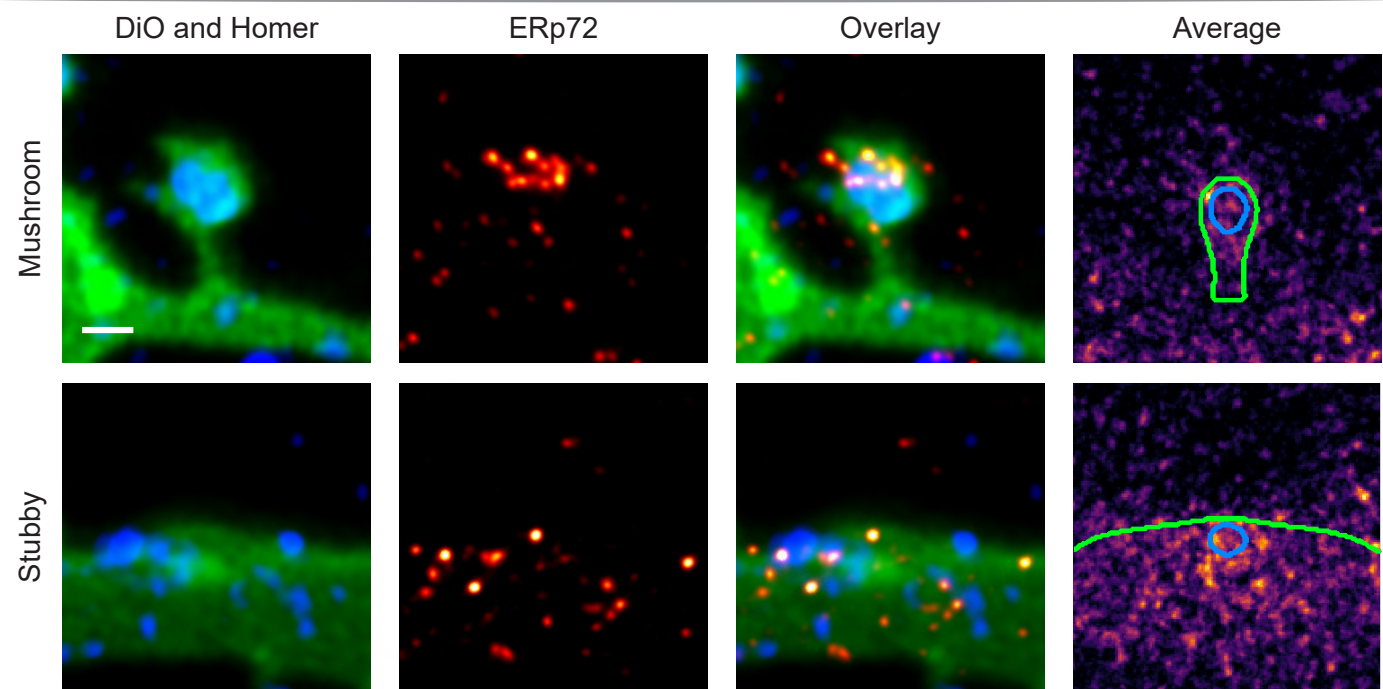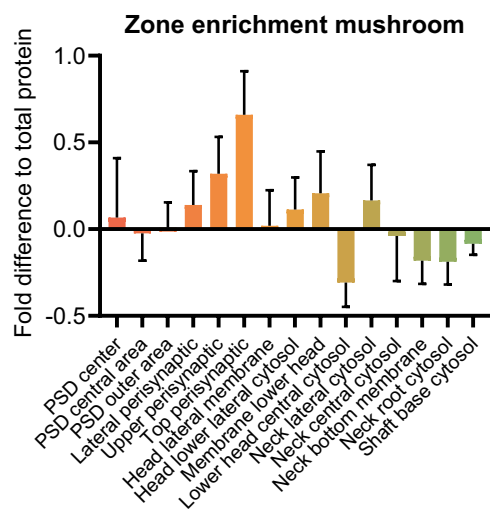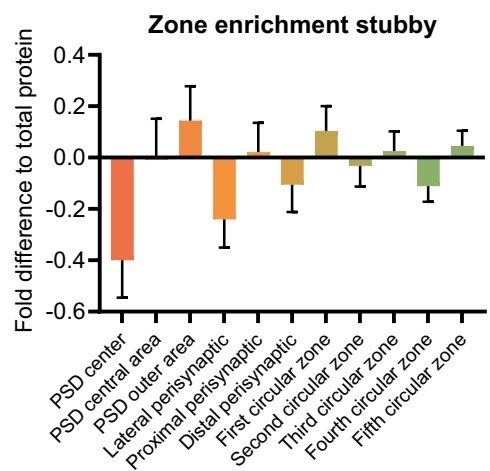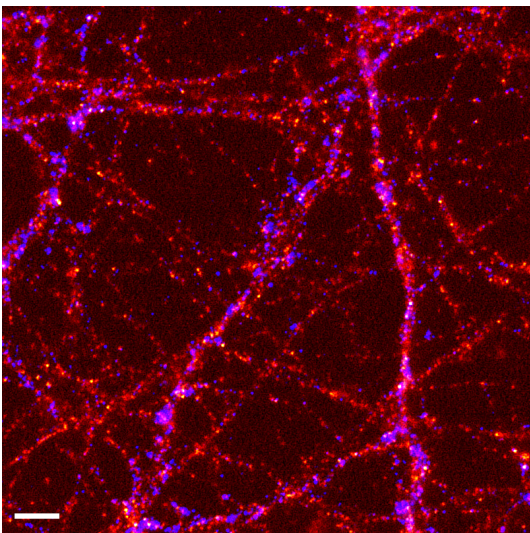

|                        |                      |              |
|------------------------|----------------------|--------------|
| Whole cell copy number | 1159270.0 ± 165411.4 |              |
| Spine copy number      | 97.3 ± 26.5          |              |
| Function               | Organelle            |              |
|                        | Mushroom             | Stubby       |
| Spine copy number      | 73.7 ± 20.1          | 119.6 ± 32.6 |
| % of total protein     | 0.0 ± 0.0%           | 0.0 ± 0.0%   |
| Molarity (μM)          | 0.9 ± 0.3            | 1.1 ± 0.3    |
| PSD copy number        | 0 ± 0.0              | 0 ± 0.0      |
| % in PSD               | 0.0 ± 0.0%           | 0.0 ± 0.0%   |

|          | Spine copy number | % of total protein | Molarity ( $\mu\text{M}$ ) | PSD copy number |
|----------|-------------------|--------------------|----------------------------|-----------------|
| Mushroom | $73.7 \pm 20.1$   | $0.0 \pm 0.0\%$    | $0.9 \pm 0.3$              | $0 \pm 0.0$     |
| Stubby   | $119.6 \pm 32.6$  | $0.0 \pm 0.0\%$    | $1.1 \pm 0.3$              | $0 \pm 0.0$     |

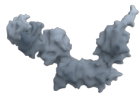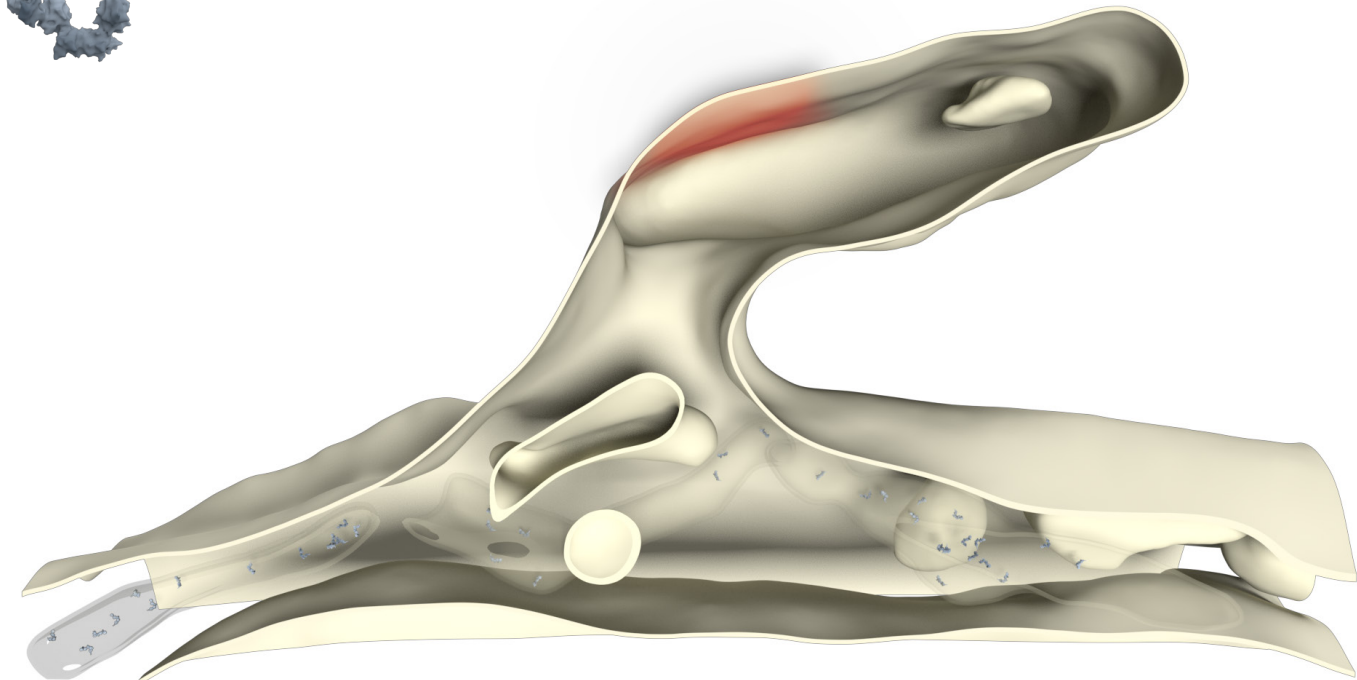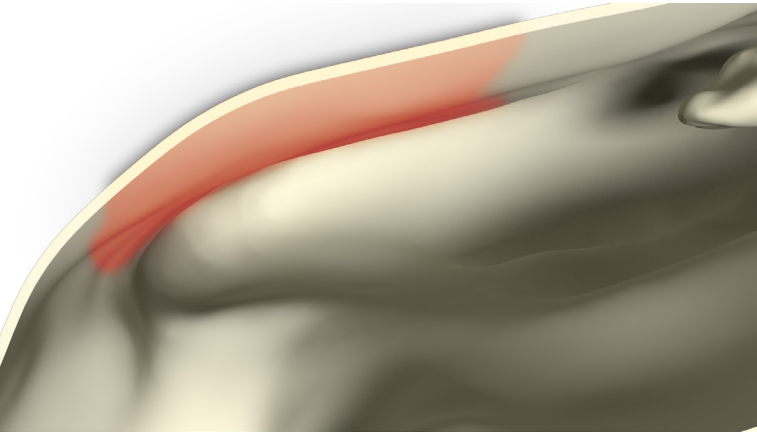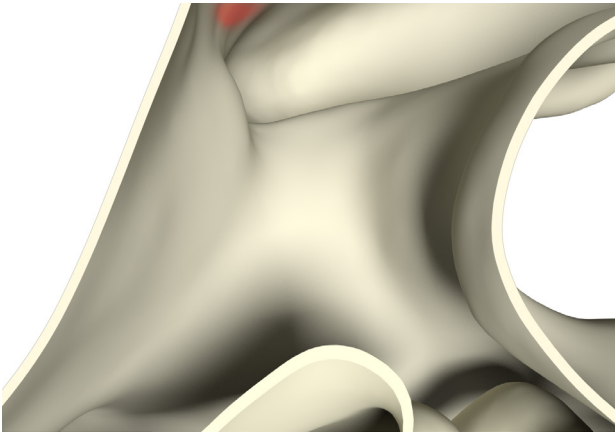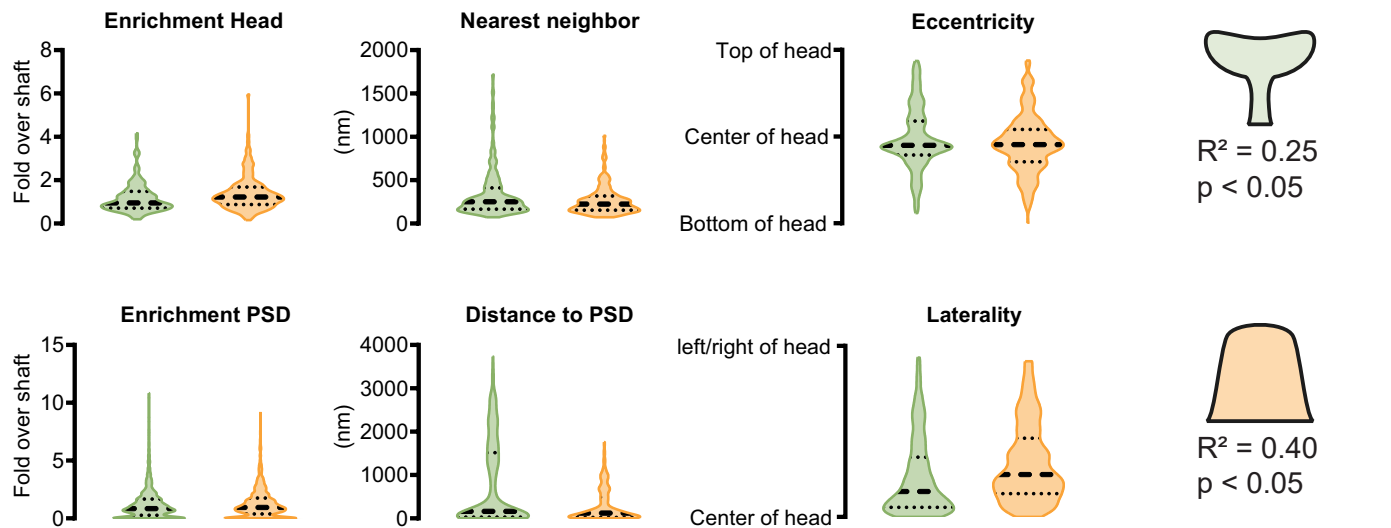

|          | Spine copy number | % of total protein | Molarity ( $\mu\text{M}$ ) | PSD copy number |
|----------|-------------------|--------------------|----------------------------|-----------------|
| Mushroom | $73.7 \pm 20.1$   | $0.0 \pm 0.0\%$    | $0.9 \pm 0.3$              | $0 \pm 0.0$     |
| Stubby   | $119.6 \pm 32.6$  | $0.0 \pm 0.0\%$    | $1.1 \pm 0.3$              | $0 \pm 0.0$     |

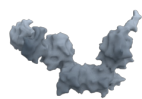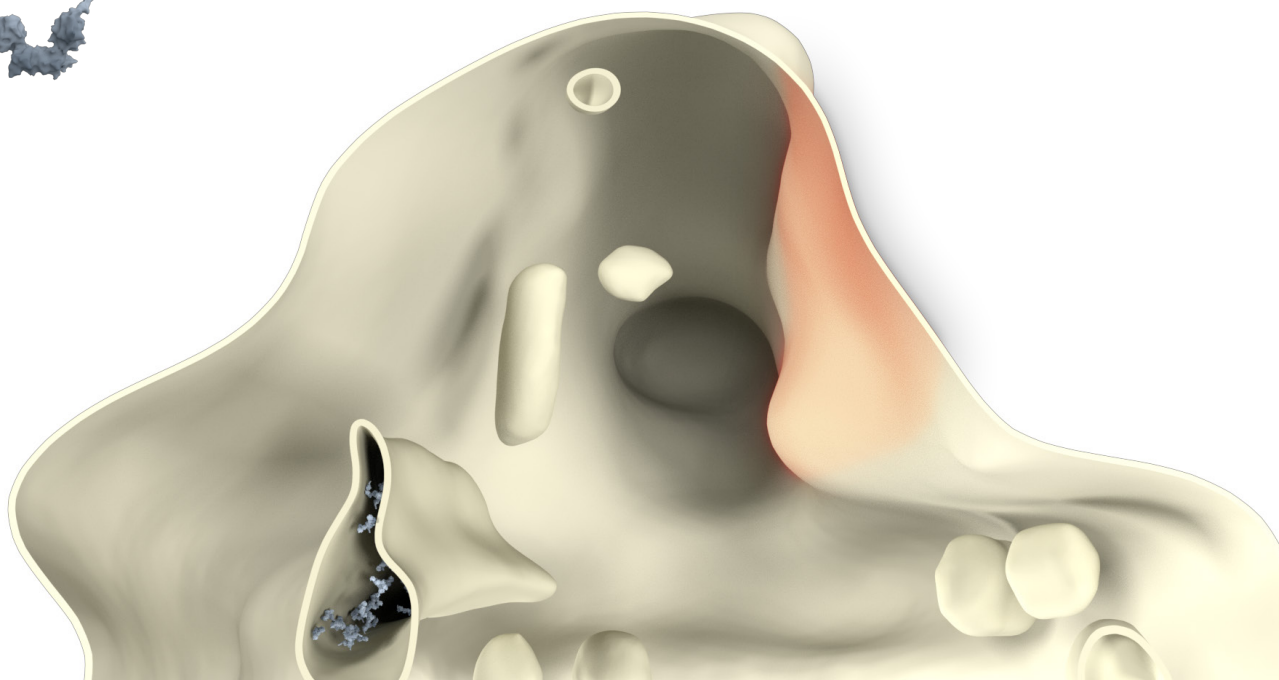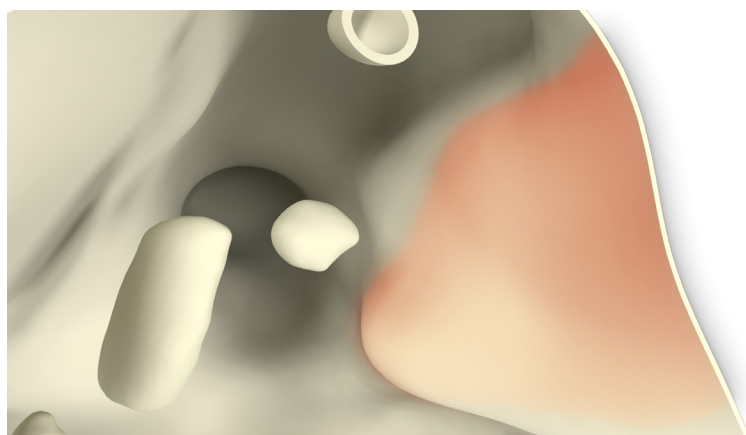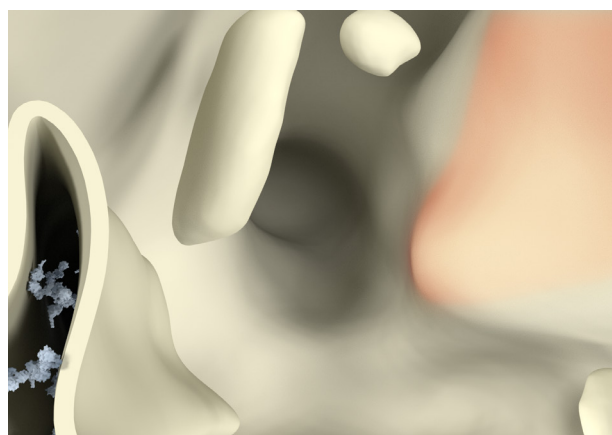

## References

**Antibody:** Cell Signaling 5033

**PDB Identifier:** 2dj1, 3ec3

### Literature:

Lièvremont et al., 1997, J. Biol. Chem.

Mazzarella et al., 1990, J. Biol. Chem.

Rupp et al., 1994, J. Biol. Chem.



## GluK1 (GluR5, Grik1, Gene: Grik1, Uniprot ID: P22756)

**Known function:** Involved in excitatory transmission, Limited role in plasticity

**Known organization:** Transmembrane protein

**Known Interactions:** PSD95

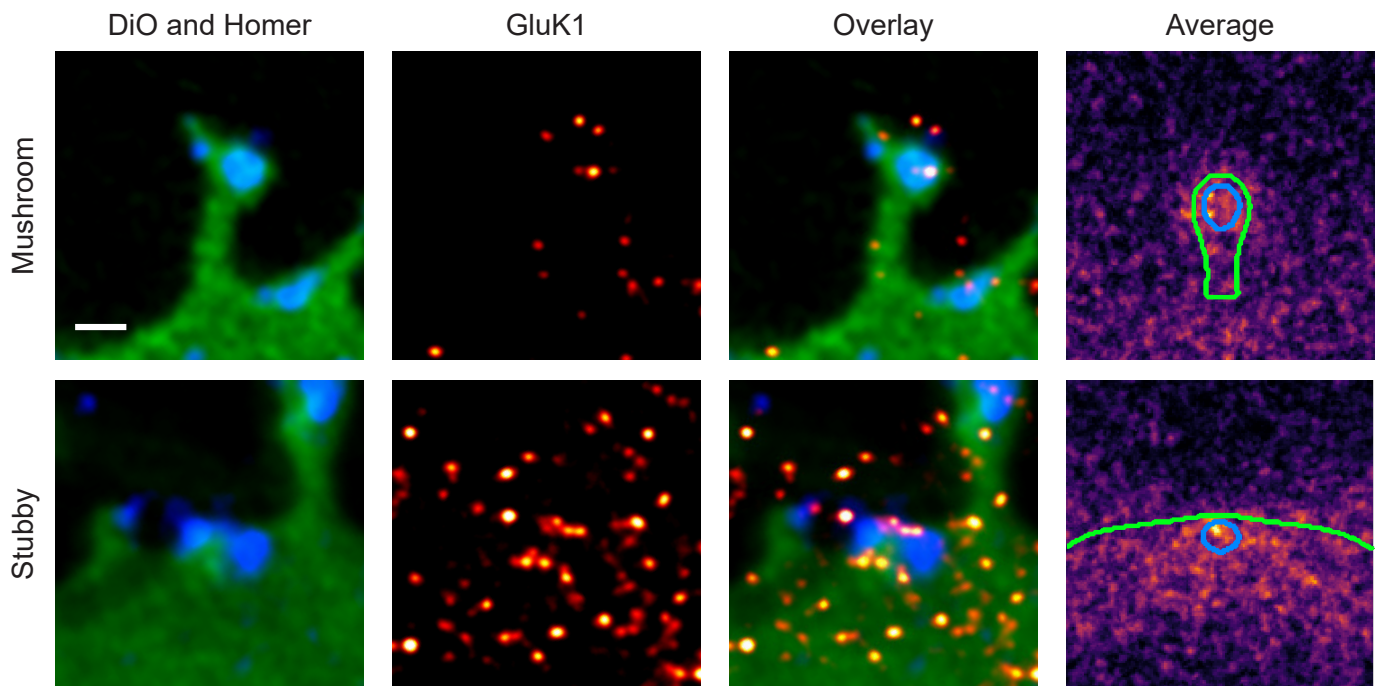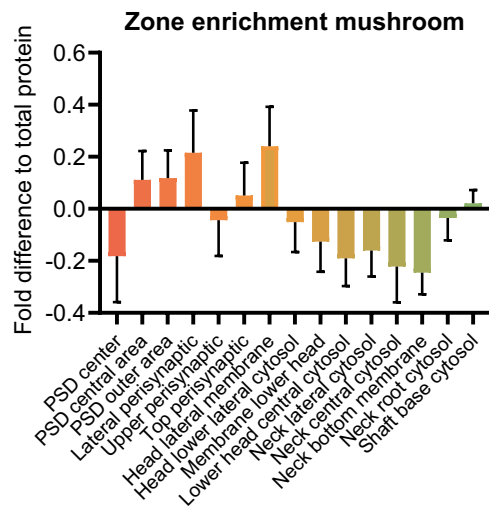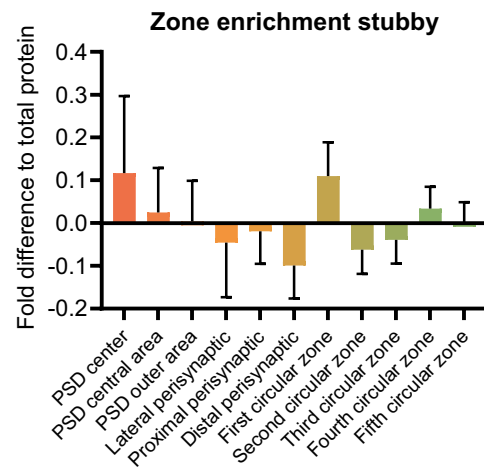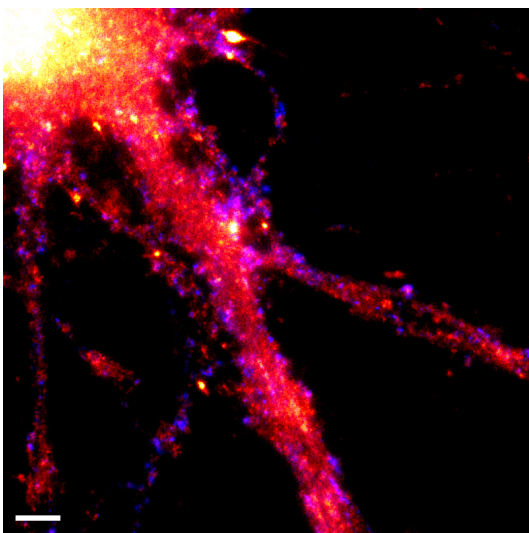

|                        |                     |              |
|------------------------|---------------------|--------------|
| Whole cell copy number | 981570.0 ± 267396.4 |              |
| Spine copy number      | 165.8 ± 55.7        |              |
| Function               | Receptor            |              |
|                        | Mushroom            | Stubby       |
| Spine copy number      | 158.9 ± 53.4        | 179.8 ± 60.4 |
| % of total protein     | 0.1 ± 0.0%          | 0.1 ± 0.0%   |
| Molarity (μM)          | 2.0 ± 0.7           | 1.7 ± 0.6    |
| PSD copy number        | 26 ± 8.7            | 27 ± 9.1     |
| % in PSD               | 16.4 ± 5.5%         | 15.0 ± 5.0%  |

|          | Spine copy number | % of total protein | Molarity ( $\mu\text{M}$ ) | PSD copy number |
|----------|-------------------|--------------------|----------------------------|-----------------|
| Mushroom | $158.9 \pm 53.4$  | $0.1 \pm 0.0\%$    | $2.0 \pm 0.7$              | $26 \pm 8.7$    |
| Stubby   | $179.8 \pm 60.4$  | $0.1 \pm 0.0\%$    | $1.7 \pm 0.6$              | $27 \pm 9.1$    |

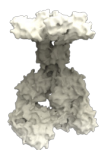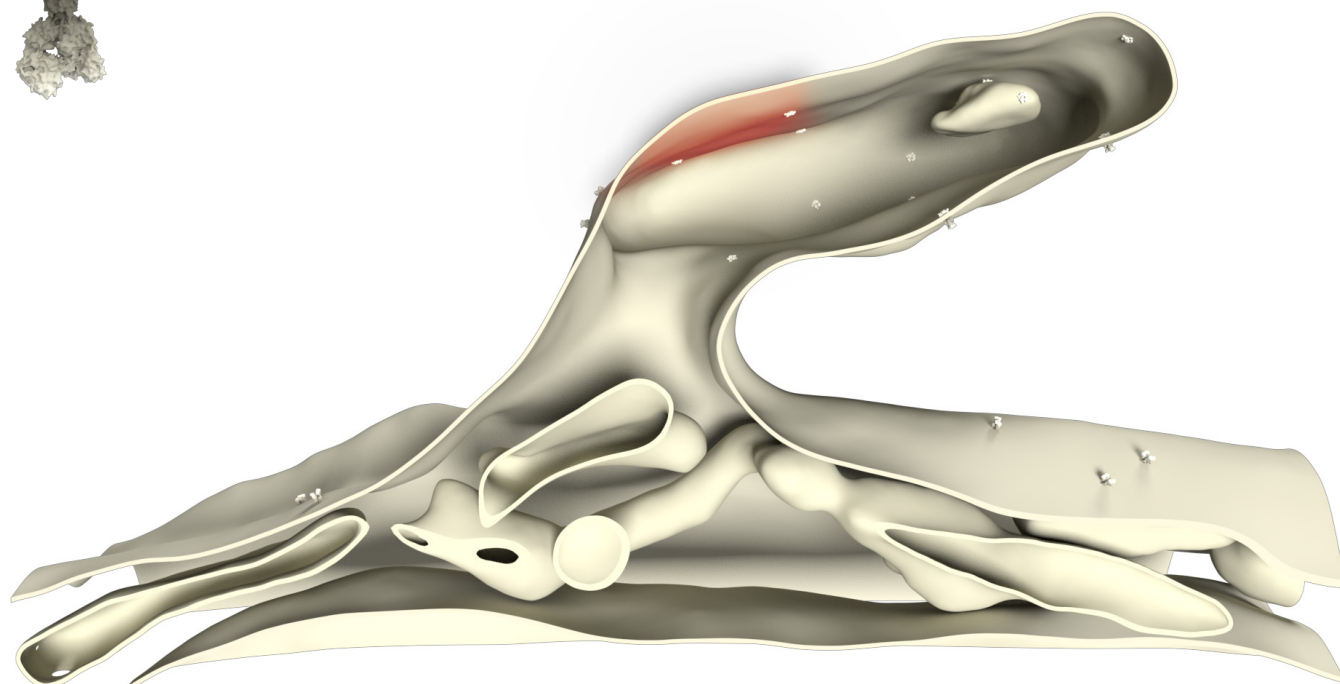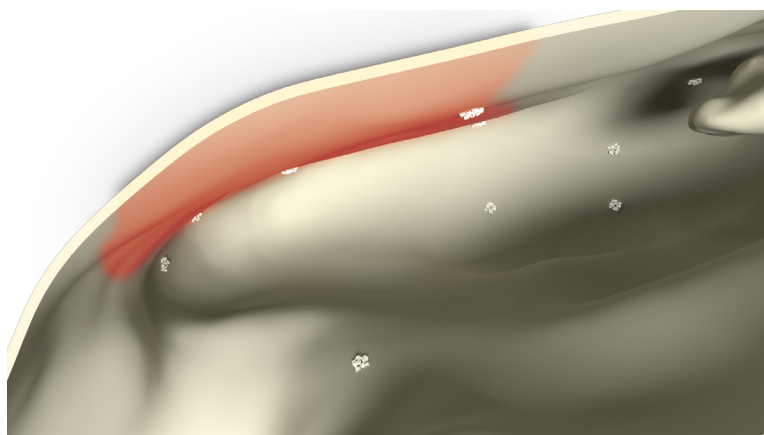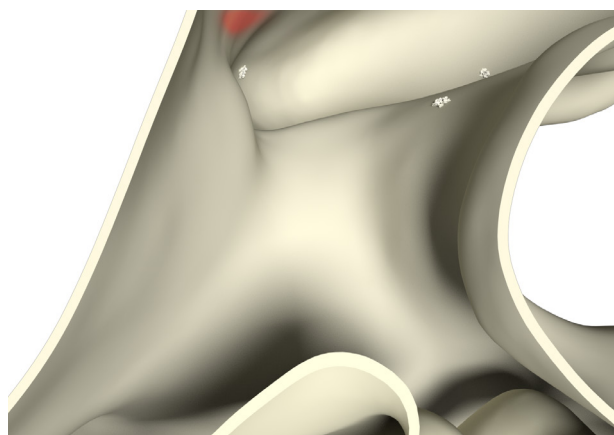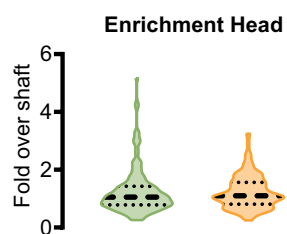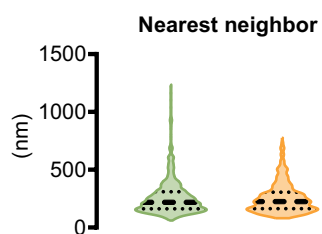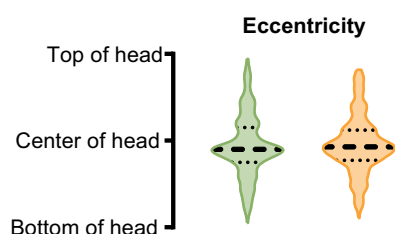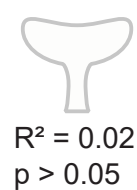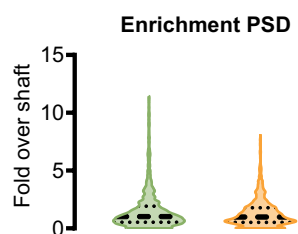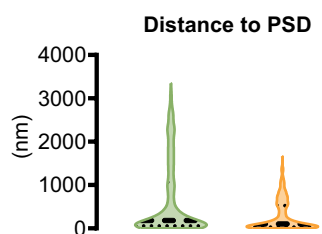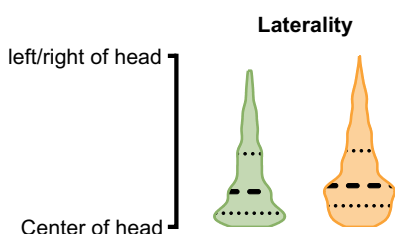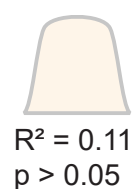

|          | Spine copy number | % of total protein | Molarity ( $\mu\text{M}$ ) | PSD copy number |
|----------|-------------------|--------------------|----------------------------|-----------------|
| Mushroom | $158.9 \pm 53.4$  | $0.1 \pm 0.0\%$    | $2.0 \pm 0.7$              | $26 \pm 8.7$    |
| Stubby   | $179.8 \pm 60.4$  | $0.1 \pm 0.0\%$    | $1.7 \pm 0.6$              | $27 \pm 9.1$    |

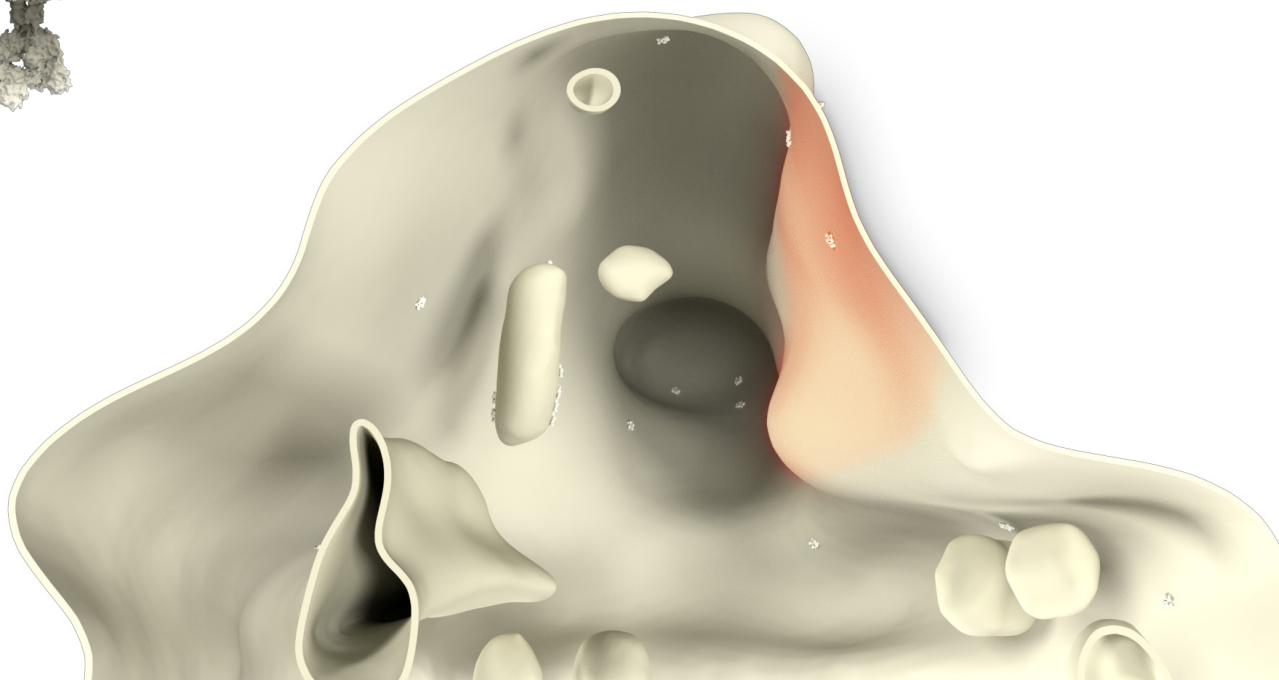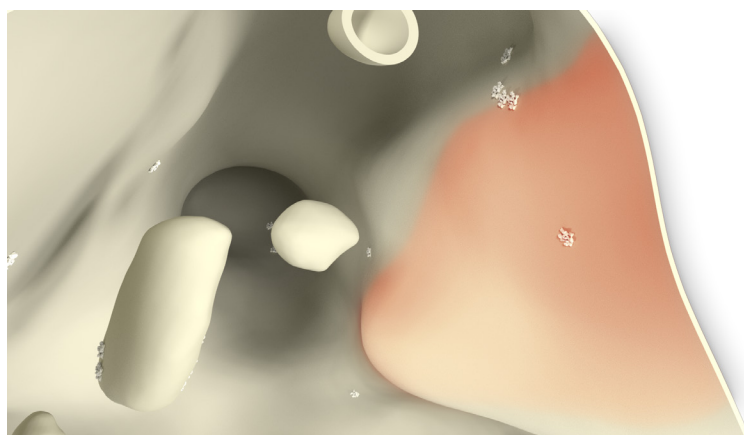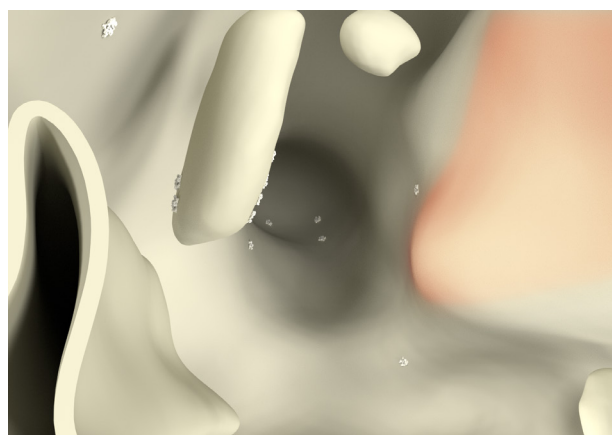

## References

**Antibody:** Alomone Labs AGC-008

**PDB Identifier:** 5kuv

### Literature:

Contractor et al., 2011, Trends Neurosci.

Hirbec et al., 2003, Neuron

Schmitz et al., 2001, Science

Song and Huganir, 2002, Trends Neurosci



## GluN1 (NMDAR1, NR1, Gene: Grin1, Uniprot ID: P35439)

**Known function:** Critical for synaptic plasticity and learning

**Known organization:** Transmembrane protein, Highly concentrated in PSD, Part of supercomplexes with PSD95 and other proteins, Often close to dopamine receptors

**Known Interactions:** mGluR5, Dopamine receptor D1

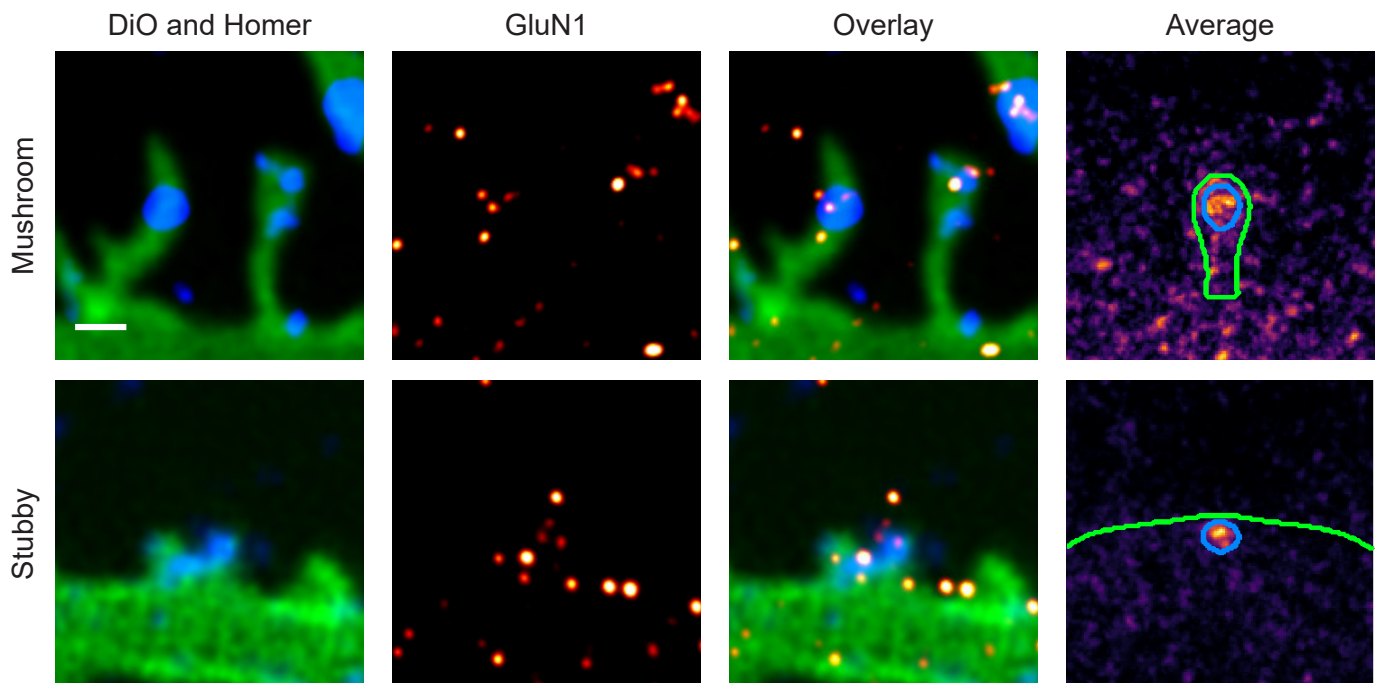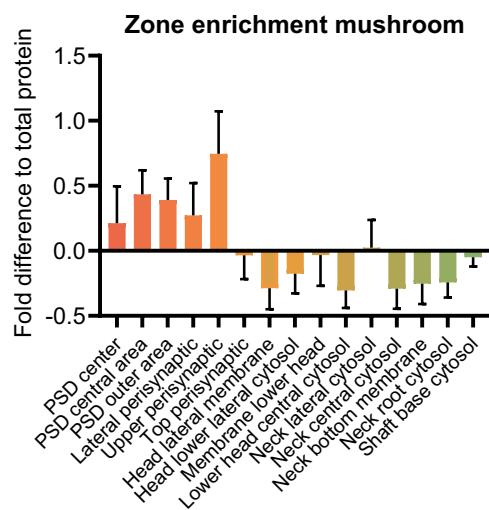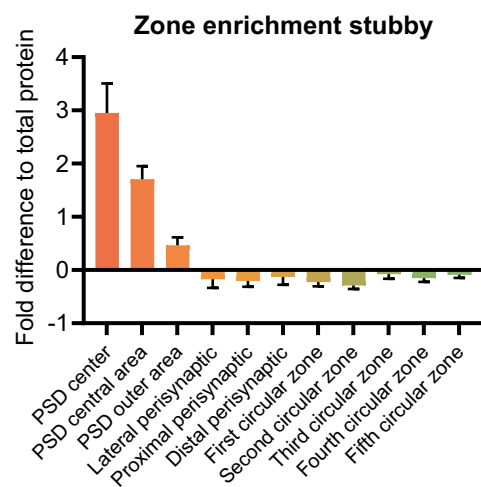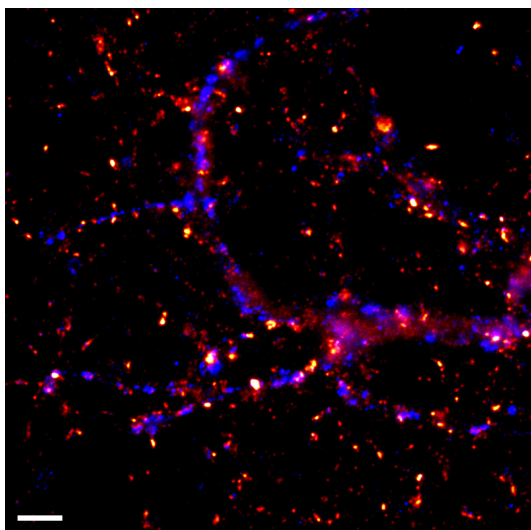

|                        |                                   |              |
|------------------------|-----------------------------------|--------------|
| Whole cell copy number | 602749.5 ± 80650.8 (extrapolated) |              |
| Spine copy number      | 247.5 ± 24.9                      |              |
| Function               | Receptor                          |              |
|                        | Mushroom                          | Stubby       |
| Spine copy number      | 214.8 ± 21.6                      | 282.6 ± 28.4 |
| % of total protein     | 0.1 ± 0.0%                        | 0.1 ± 0.0%   |
| Molarity (μM)          | 2.7 ± 0.3                         | 2.7 ± 0.3    |
| PSD copy number        | 55 ± 5.5                          | 139 ± 14.0   |
| % in PSD               | 25.6 ± 2.6%                       | 49.2 ± 5.0%  |

|          | Spine copy number | % of total protein | Molarity ( $\mu\text{M}$ ) | PSD copy number |
|----------|-------------------|--------------------|----------------------------|-----------------|
| Mushroom | $214.8 \pm 21.6$  | $0.1 \pm 0.0\%$    | $2.7 \pm 0.3$              | $55 \pm 5.5$    |
| Stubby   | $282.6 \pm 28.4$  | $0.1 \pm 0.0\%$    | $2.7 \pm 0.3$              | $139 \pm 14.0$  |

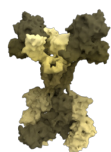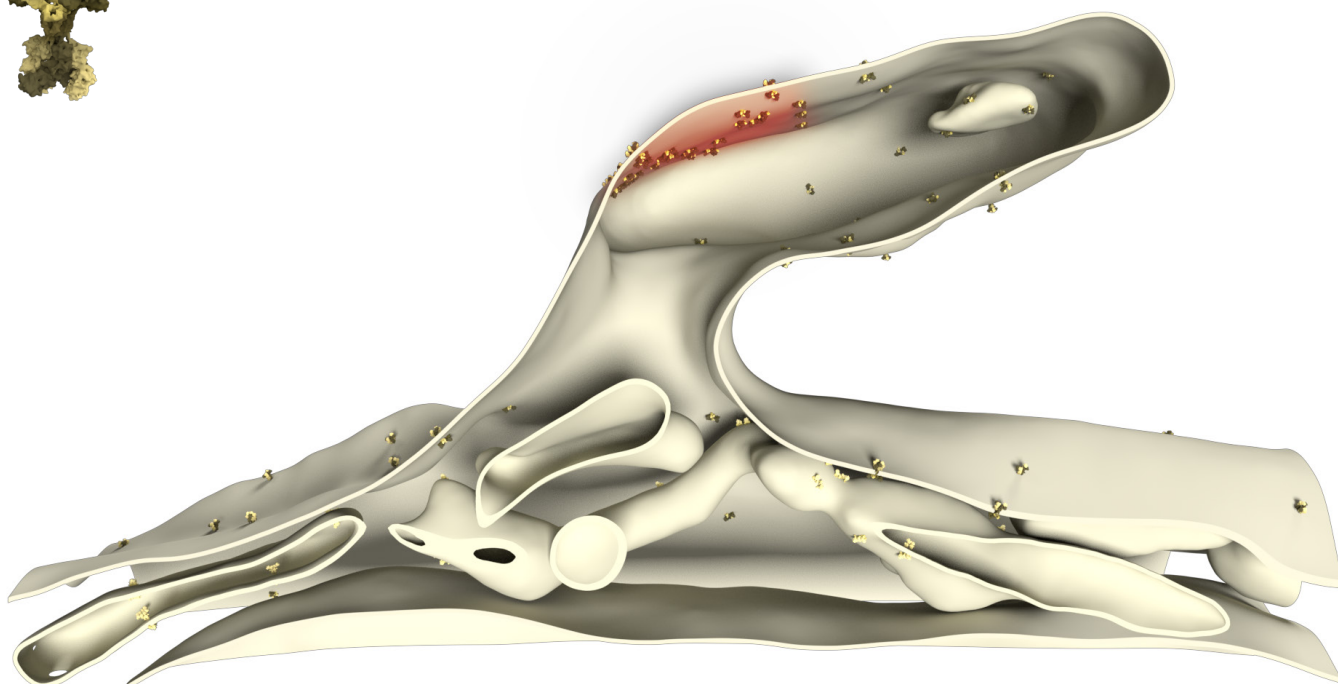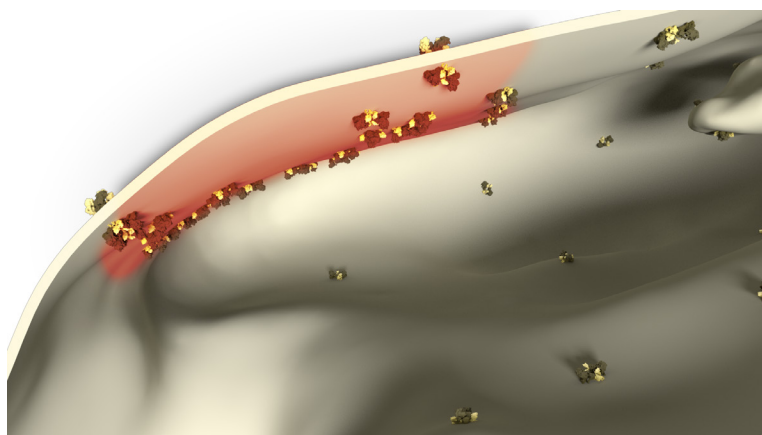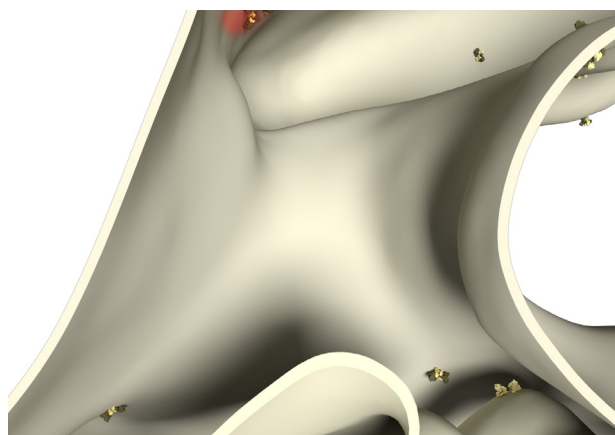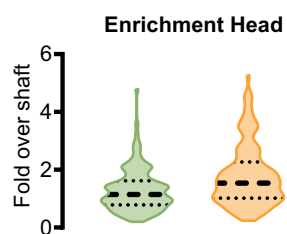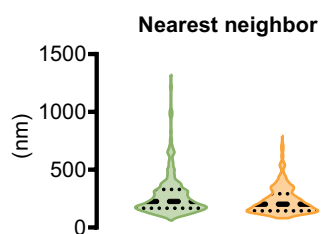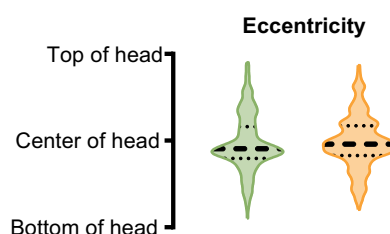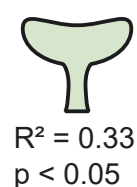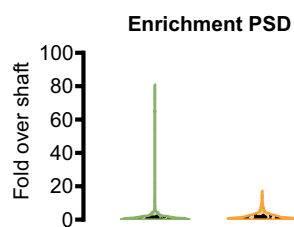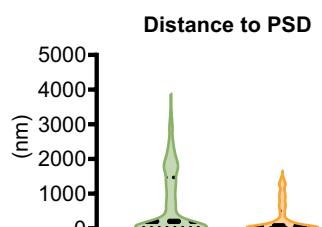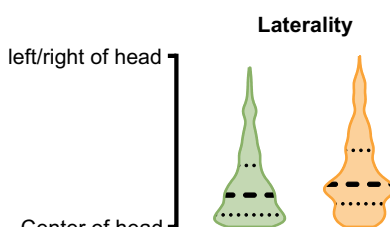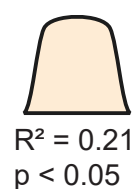

|          | Spine copy number | % of total protein | Molarity ( $\mu\text{M}$ ) | PSD copy number |
|----------|-------------------|--------------------|----------------------------|-----------------|
| Mushroom | $214.8 \pm 21.6$  | $0.1 \pm 0.0\%$    | $2.7 \pm 0.3$              | $55 \pm 5.5$    |
| Stubby   | $282.6 \pm 28.4$  | $0.1 \pm 0.0\%$    | $2.7 \pm 0.3$              | $139 \pm 14.0$  |

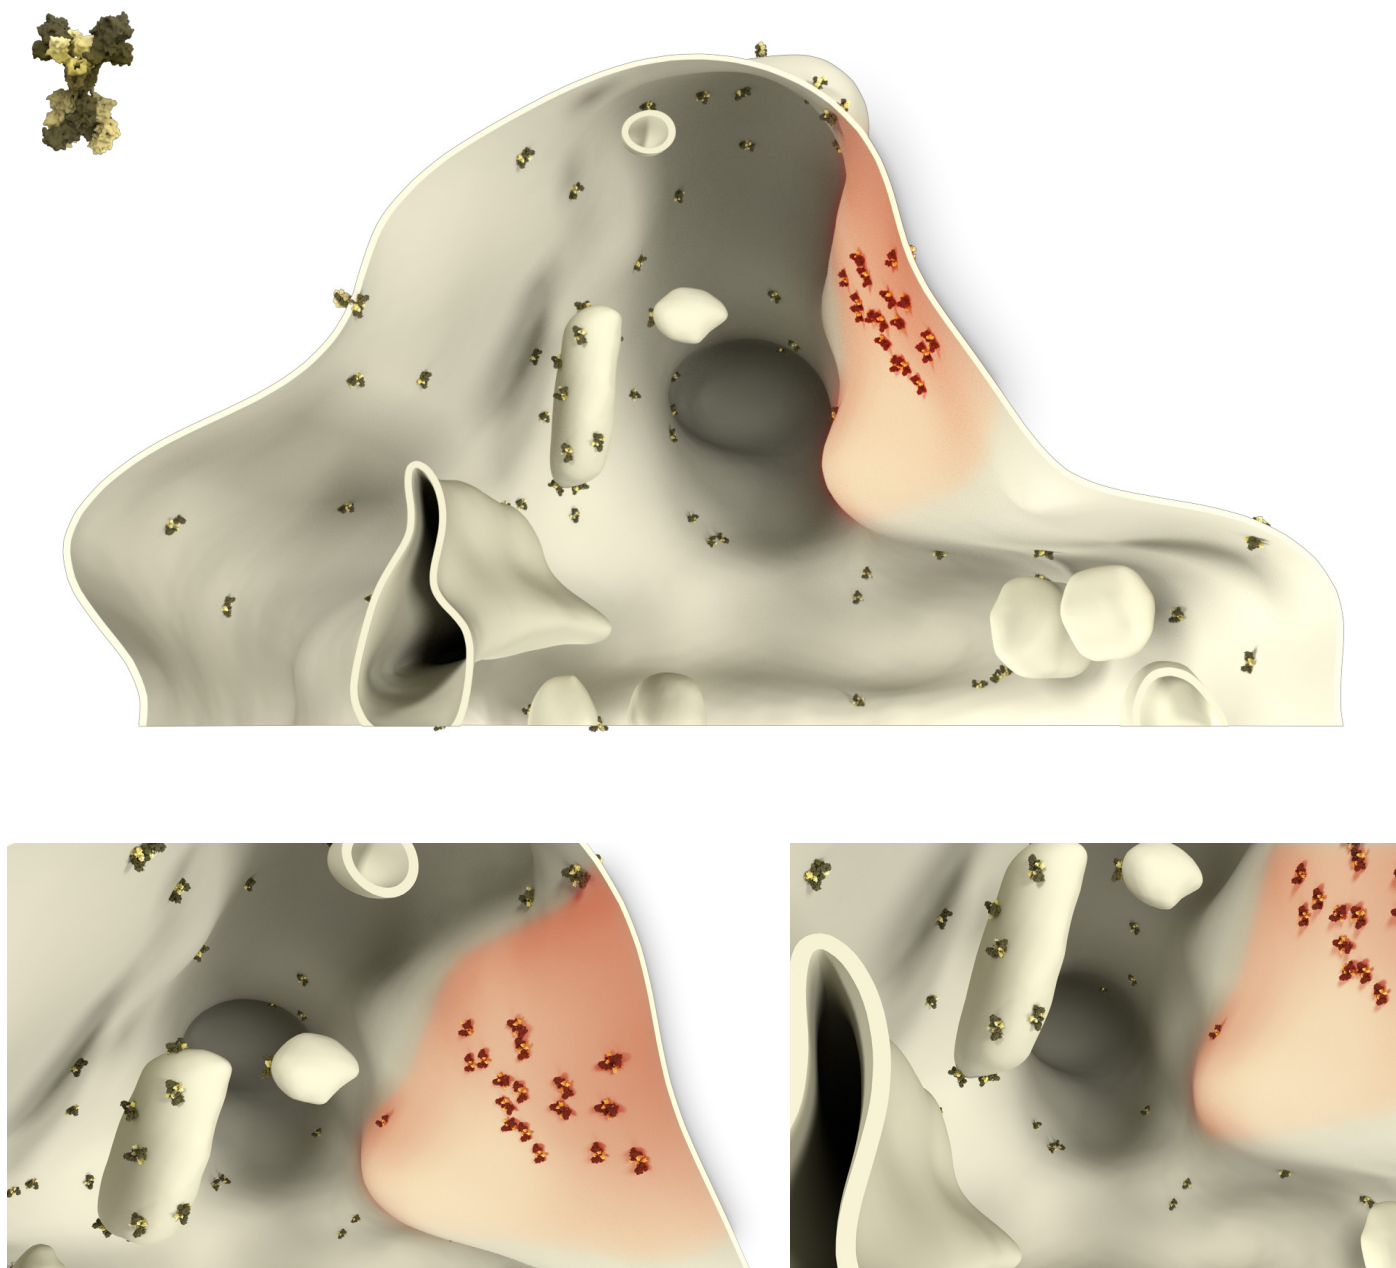

## References

**Antibody:** Synaptic Systems 114 011

**PDB Identifier:** 4pe5

### Literature:

Perroy et al., 2008, J. Biol. Chem.

Pei, 2004, J. Neurosci.

Lee et al., 2002, Cell

MacGillavry et al., 2013, Neuron

Dani et al., 2010, Neuron

Frank et al., 2016, Nat. Commun.



## GluN2A (NMDAR2A, NR2A, Gene: Grin2a, Uniprot ID: Q00959)

**Known function:** Critical for synaptic plasticity and learning, Postnatal dominant isoform.

**Known organization:** Transmembrane protein, Highly concentrated in PSD, Part of supercomplexes with PSD95 and other proteins, Often close to Dopamine receptors

**Known Interactions:** PSD93, PSD95, Dopamine Receptor D1, Calmodulin, CaMKII

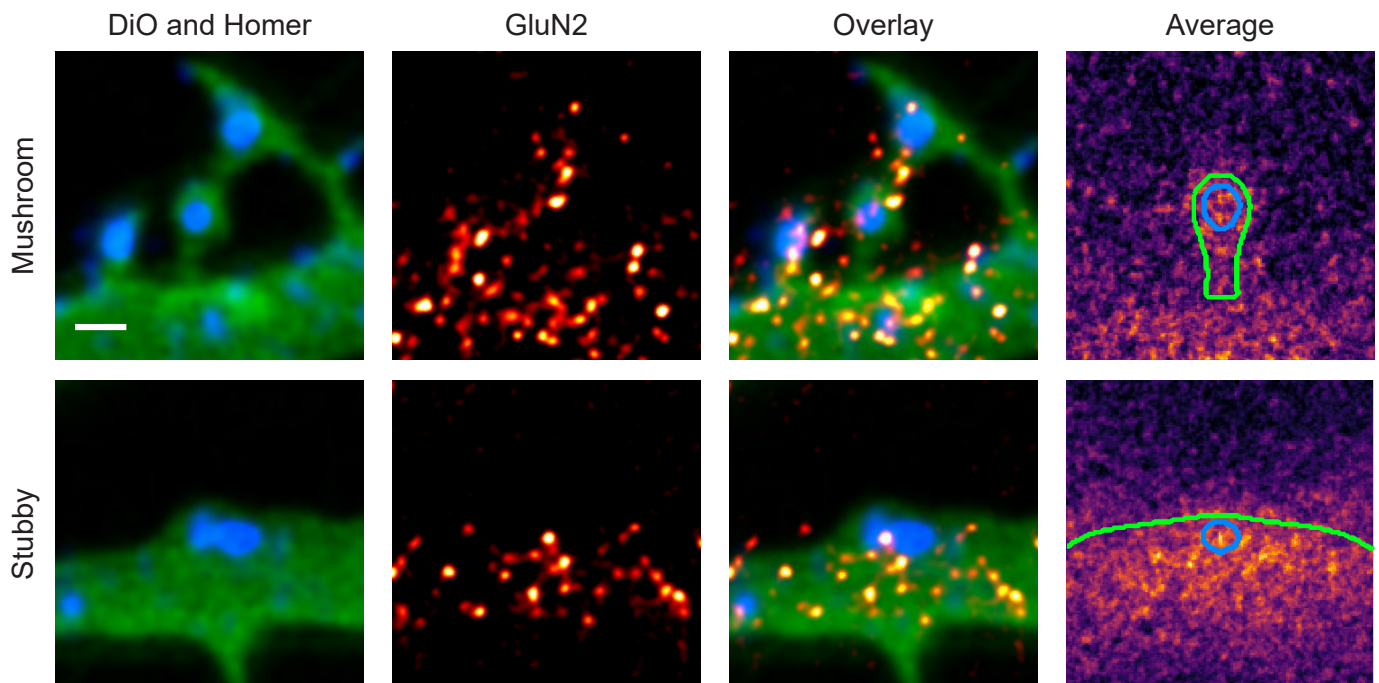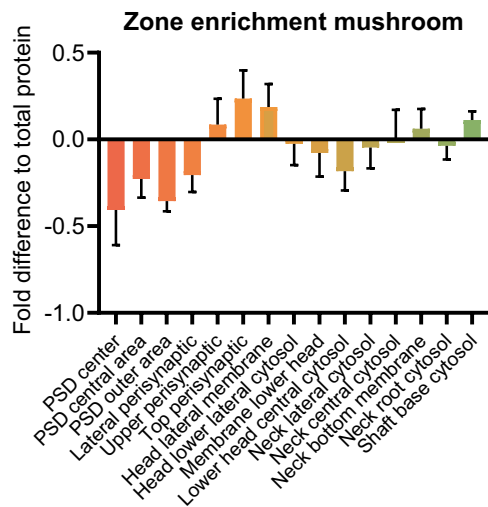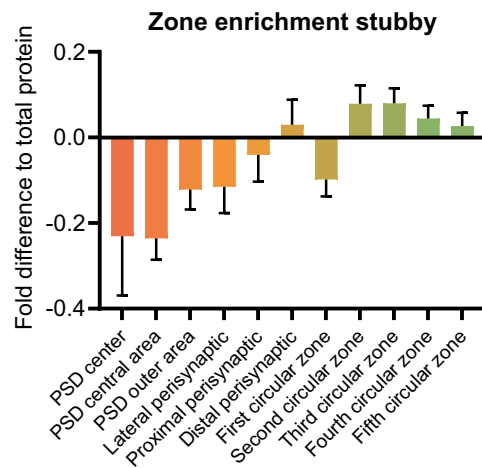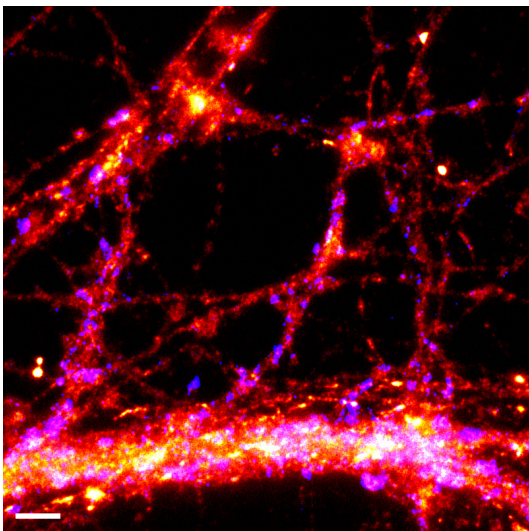

|                        |                 |            |
|------------------------|-----------------|------------|
| Whole cell copy number | 20863.6 ± 358.3 |            |
| Spine copy number      | 2.2 ± 0.7       |            |
| Function               | Receptor        |            |
|                        | Mushroom        | Stubby     |
| Spine copy number      | 1.7 ± 0.6       | 2.9 ± 0.9  |
| % of total protein     | 0.0 ± 0.0%      | 0.0 ± 0.0% |
| Molarity (μM)          | 0.0 ± 0.0       | 0.0 ± 0.0  |
| PSD copy number        | 0 ± 0.0         | 0 ± 0.0    |
| % in PSD               | 0.0 ± 0.0%      | 0.0 ± 0.0% |

|          | Spine copy number | % of total protein | Molarity ( $\mu\text{M}$ ) | PSD copy number |
|----------|-------------------|--------------------|----------------------------|-----------------|
| Mushroom | $1.7 \pm 0.6$     | $0.0 \pm 0.0\%$    | $0.0 \pm 0.0$              | $0 \pm 0.0$     |
| Stubby   | $2.9 \pm 0.9$     | $0.0 \pm 0.0\%$    | $0.0 \pm 0.0$              | $0 \pm 0.0$     |

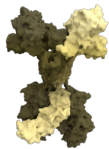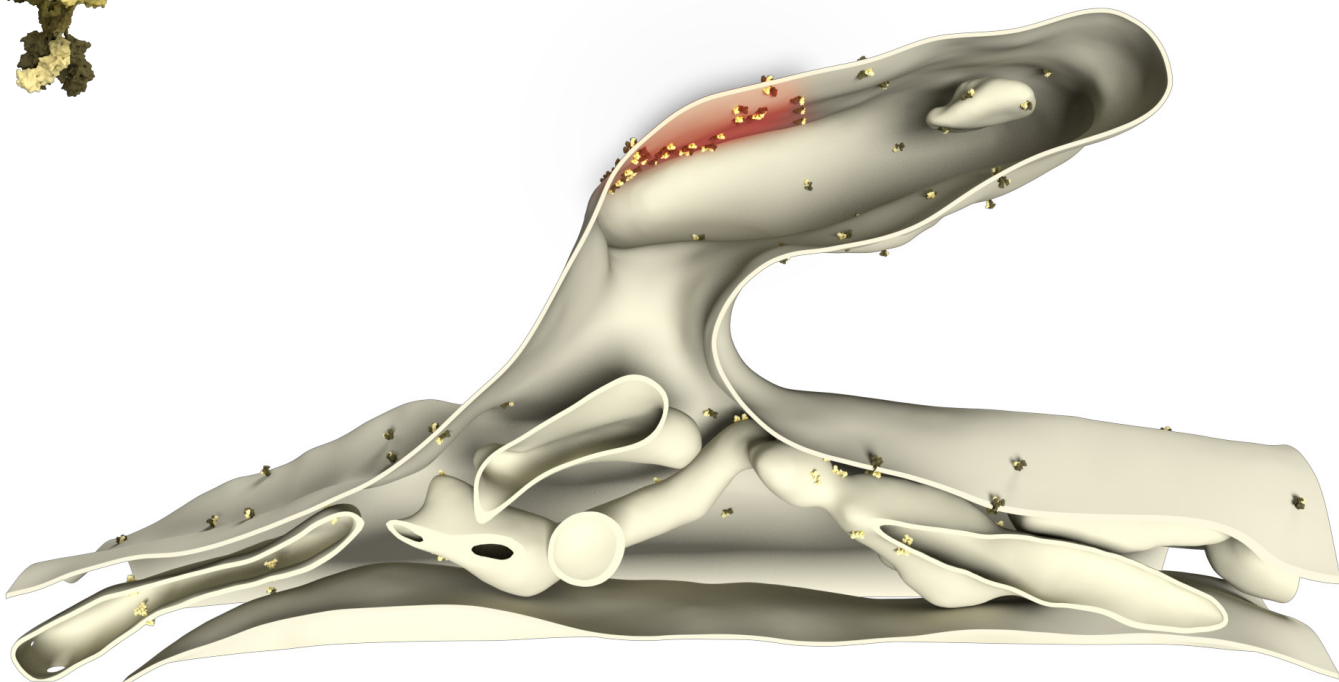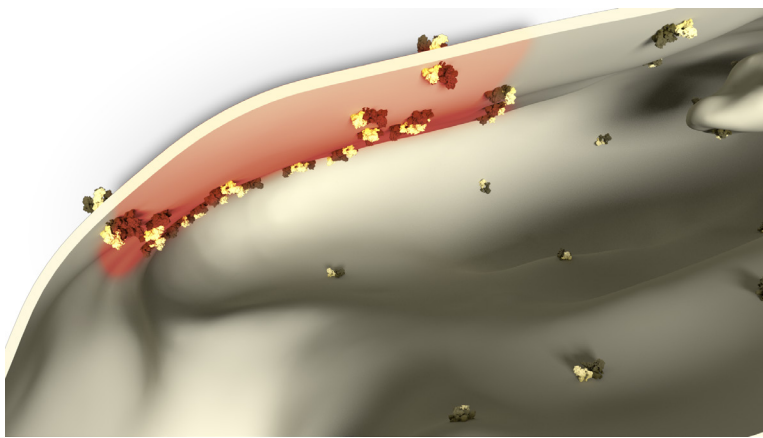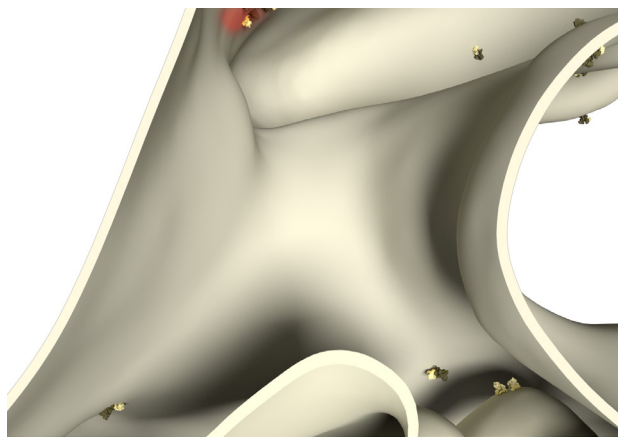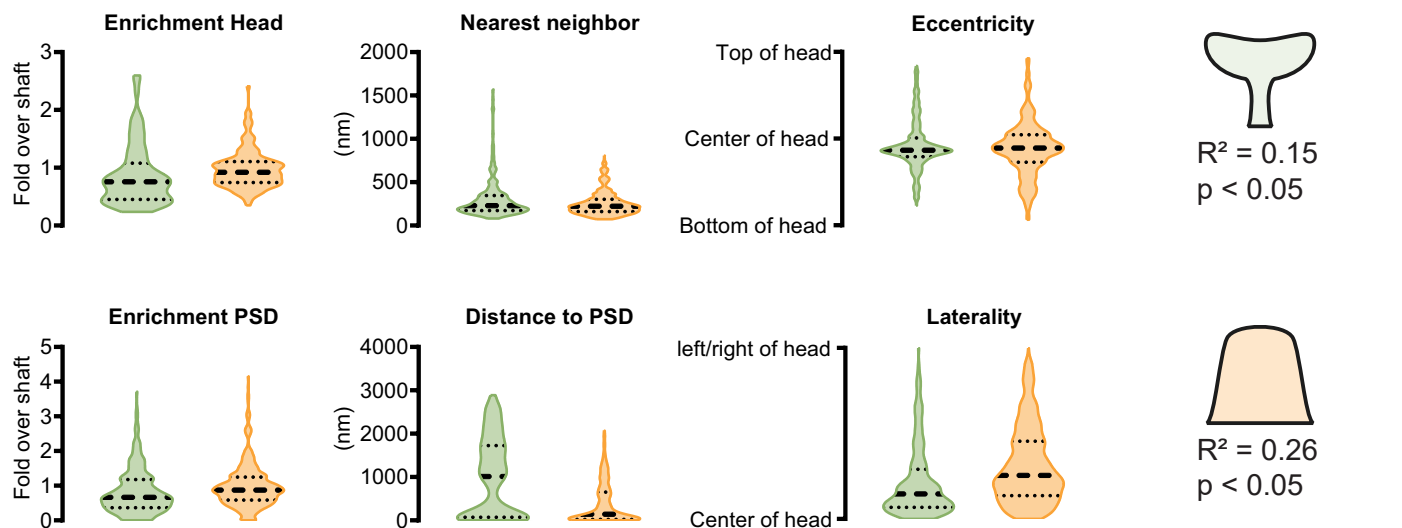

|          | Spine copy number | % of total protein | Molarity ( $\mu\text{M}$ ) | PSD copy number |
|----------|-------------------|--------------------|----------------------------|-----------------|
| Mushroom | $1.7 \pm 0.6$     | $0.0 \pm 0.0\%$    | $0.0 \pm 0.0$              | $0 \pm 0.0$     |
| Stubby   | $2.9 \pm 0.9$     | $0.0 \pm 0.0\%$    | $0.0 \pm 0.0$              | $0 \pm 0.0$     |

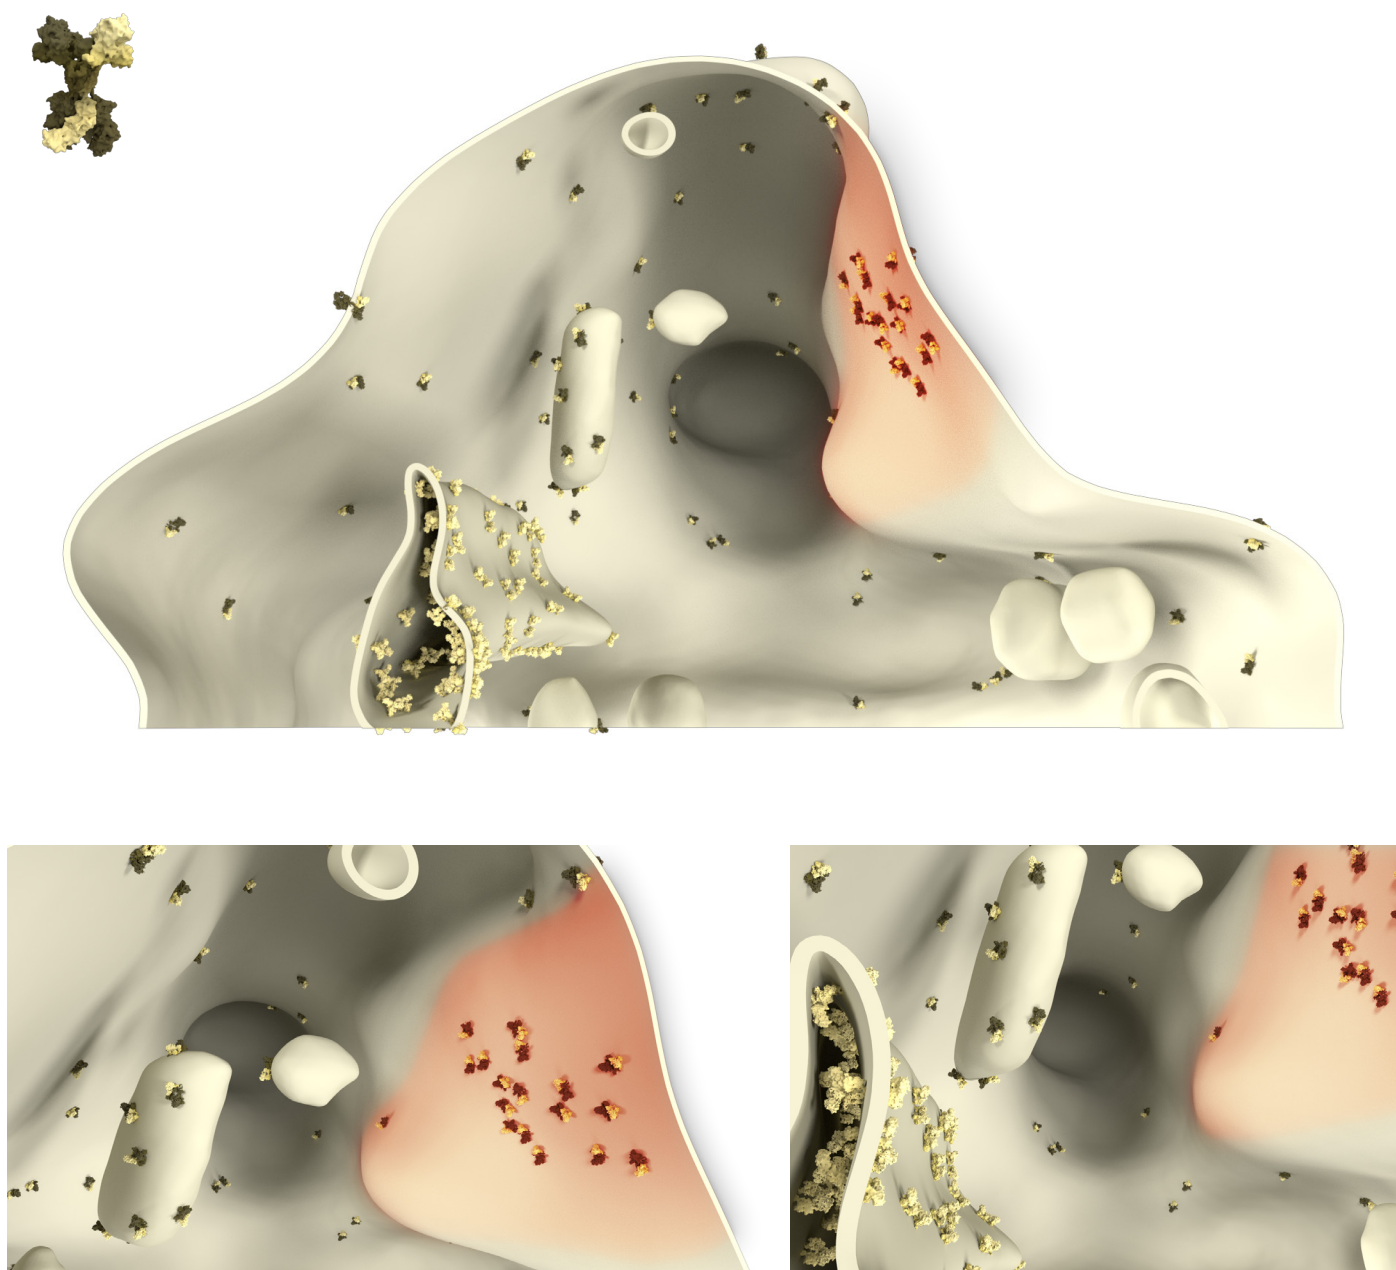

## References

**Antibody:** NeuroMab 75-288

**PDB Identifier:** 5uow

### Literature:

Al-Hallaq et al., 2007, J. Neurosci.

Bard et al., 2010, Proc. Natl. Acad. Sci. U S A

Ehlers et al., 1996, Cell

Elias and Nicoll, 2007, Trends Cell. Biol.

Frank et al., 2016, Nat. Commun.

Krapivinsky et al., 2003, Neuron

Lee et al., 2002, Cell

MacGillavry et al., 2013, Neuron

Pei, 2004, J. Neurosci.

Racca et al., 2000, J. Neurosci.

Sans et al., 2000, J. Neurosci.

Sheng et al., 1994, Nature

Shinohara et al., 2008, Proc. Natl. Acad. Sci. U S A

Wyszynski et al., 1997, Nature



## GluN2B (NR2B, NMDAR2B, Gene: Grin2b, Uniprot ID: Q00960)

**Known function:** Critical for synaptic plasticity and learning, Prenatal dominant isoform

**Known organization:** Transmembrane protein, Highly concentrated in PSD, Part of supercomplexes with PSD95 and other proteins, Often colocalized with Dopamine receptors

**Known Interactions:** PSD93, PSD95, mGluR5, Dopamine Receptor D2, CaM, CaMKII

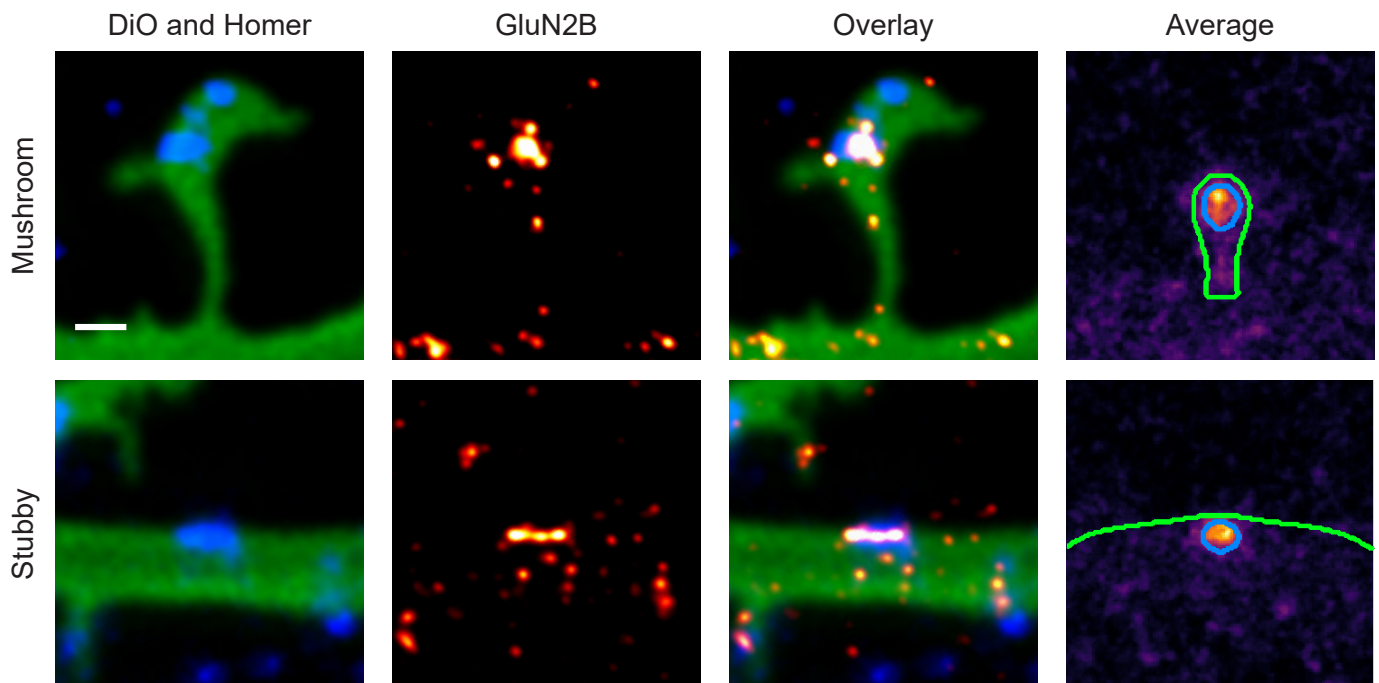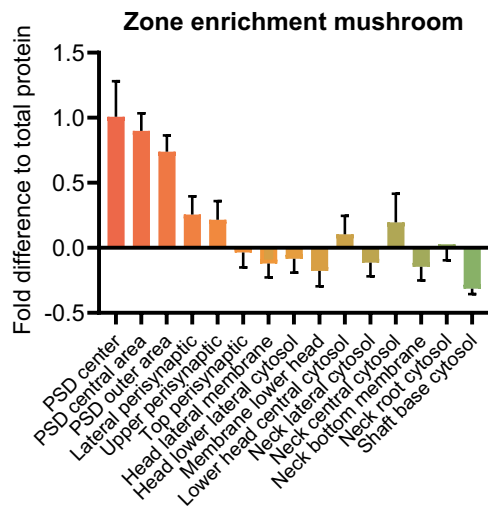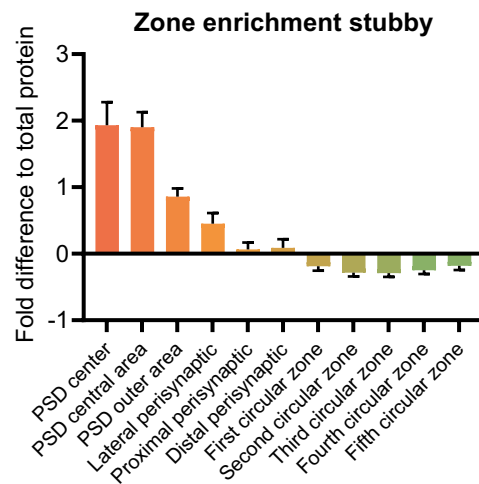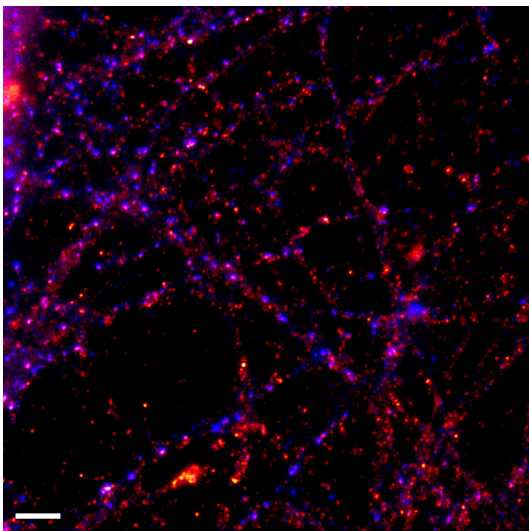

|                        |                                    |              |
|------------------------|------------------------------------|--------------|
| Whole cell copy number | 757451.7 ± 105875.3 (extrapolated) |              |
| Spine copy number      | 355.2 ± 40.7                       |              |
| Function               | Receptor                           |              |
|                        | Mushroom                           | Stubby       |
| Spine copy number      | 319.9 ± 36.7                       | 433.7 ± 49.7 |
| % of total protein     | 0.3 ± 0.0%                         | 0.3 ± 0.0%   |
| Molarity (μM)          | 4.1 ± 0.5                          | 4.1 ± 0.5    |
| PSD copy number        | 152 ± 17.4                         | 253 ± 29.0   |
| % in PSD               | 47.5 ± 5.4%                        | 58.3 ± 6.7%  |

|          | Spine copy number | % of total protein | Molarity ( $\mu\text{M}$ ) | PSD copy number |
|----------|-------------------|--------------------|----------------------------|-----------------|
| Mushroom | $319.9 \pm 36.7$  | $0.3 \pm 0.0\%$    | $4.1 \pm 0.5$              | $152 \pm 17.4$  |
| Stubby   | $433.7 \pm 49.7$  | $0.3 \pm 0.0\%$    | $4.1 \pm 0.5$              | $253 \pm 29.0$  |

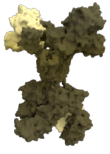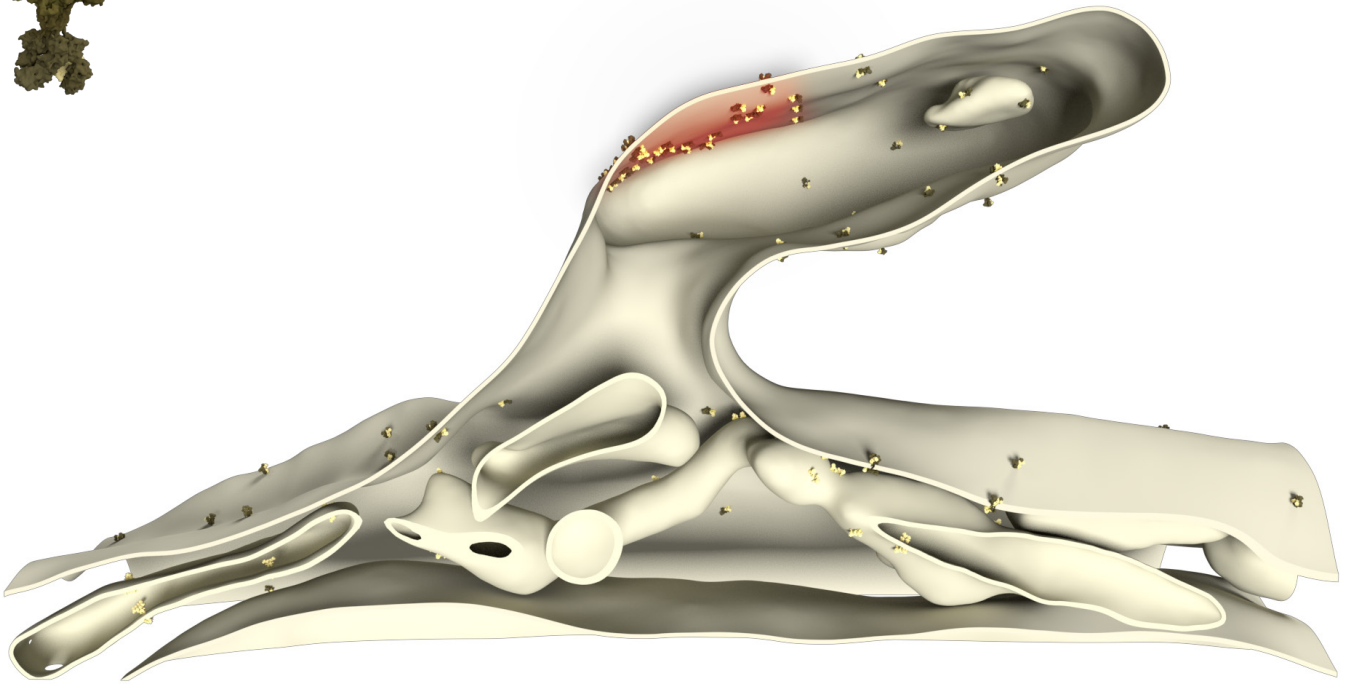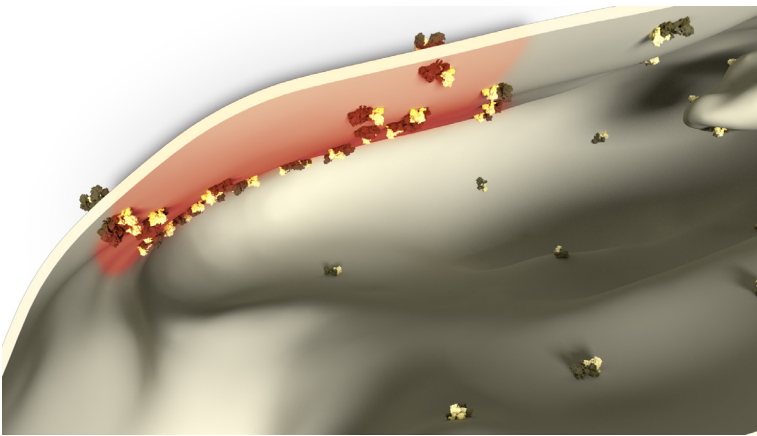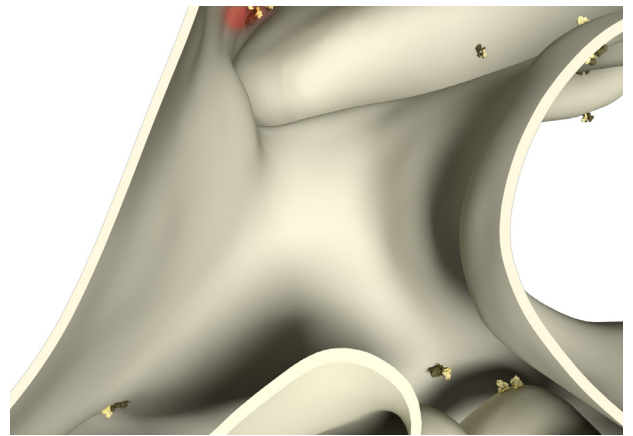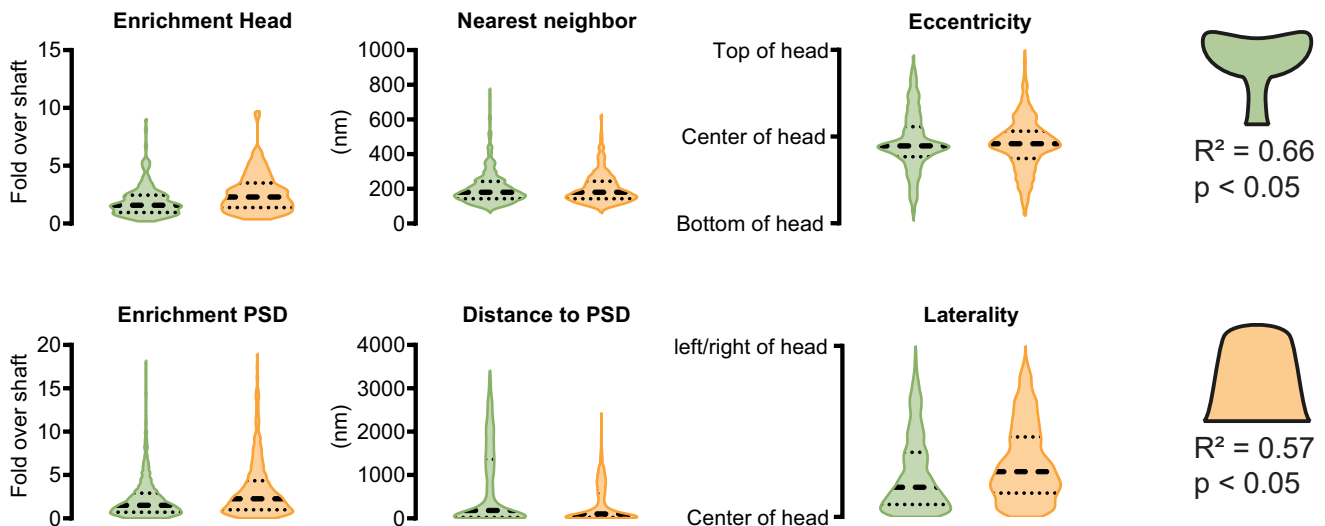

|          | Spine copy number | % of total protein | Molarity ( $\mu\text{M}$ ) | PSD copy number |
|----------|-------------------|--------------------|----------------------------|-----------------|
| Mushroom | $319.9 \pm 36.7$  | $0.3 \pm 0.0\%$    | $4.1 \pm 0.5$              | $152 \pm 17.4$  |
| Stubby   | $433.7 \pm 49.7$  | $0.3 \pm 0.0\%$    | $4.1 \pm 0.5$              | $253 \pm 29.0$  |

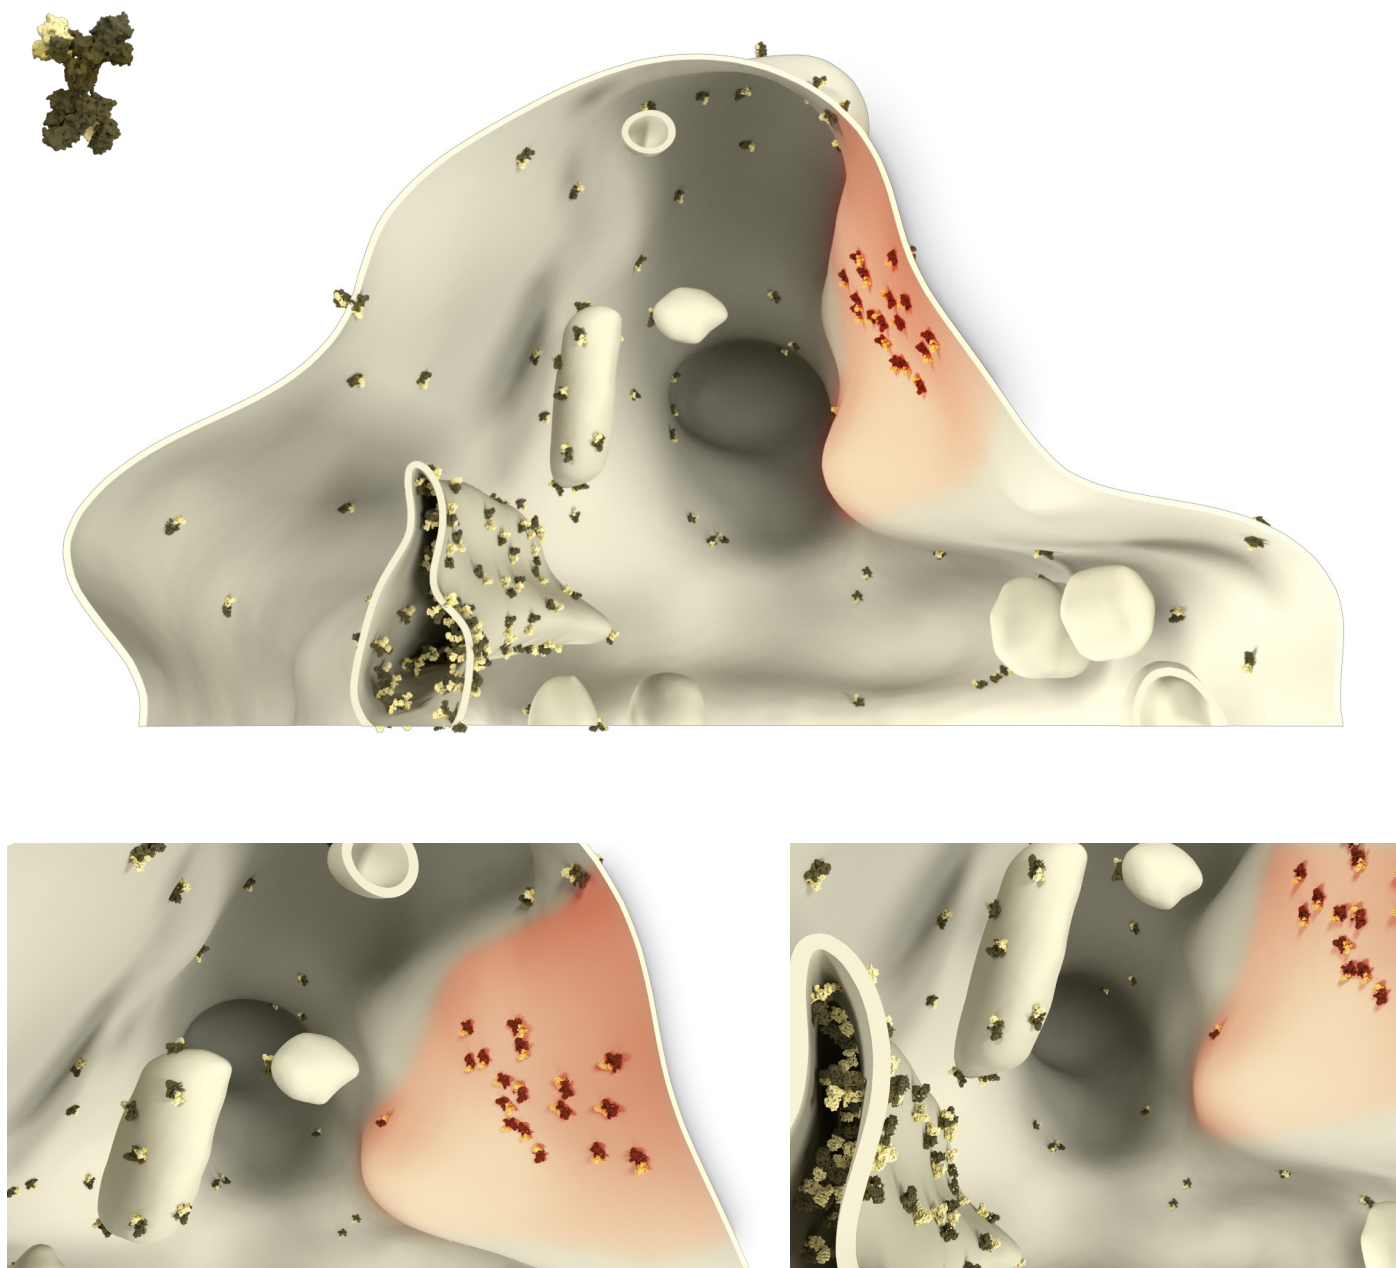

## References

**Antibody:** Neuromab 75-101

**PDB Identifier:** 6cna

### Literature:

Al-Hallaq et al., 2007, J. Neurosci.

Bard et al., 2010, Proc. Natl. Acad. Sci. U S A

Ehlers et al., 1996, Cell

Elias and Nicoll, 2007, Trends Cell. Biol.

Krapivinsky et al., 2003, Neuron

Racca et al., 2000, J. Neurosci.

Sans et al., 2000, J. Neurosci.

Sheng et al., 1994, Nature

Shinohara et al., 2008, Proc. Natl. Acad. Sci. U S A

Wyszynski et al., 1997, Nature

Halt et al., 2012, EMBO J.

Liu et al., 2006, Neuron

Zhang and Diamond, 2009, J. Neurosci.

Zhou et al., 2007, J. Neurosci.

MacGillavry et al., 2013, Neuron

Dani et al., 2010, Neuron



**GluR1 (GluA1, Gene: Gria1, Uniprot ID: P19490)**

**Known function:** Part of primary glutamate receptor, Important for plasticity, Rapidly delivered to synapse upon activation, Stable localization at synapse

**Known organization:** Transmembrane proteine, Heterotetramers, Forms 80 nm clusters,

**Known Interactions:** None

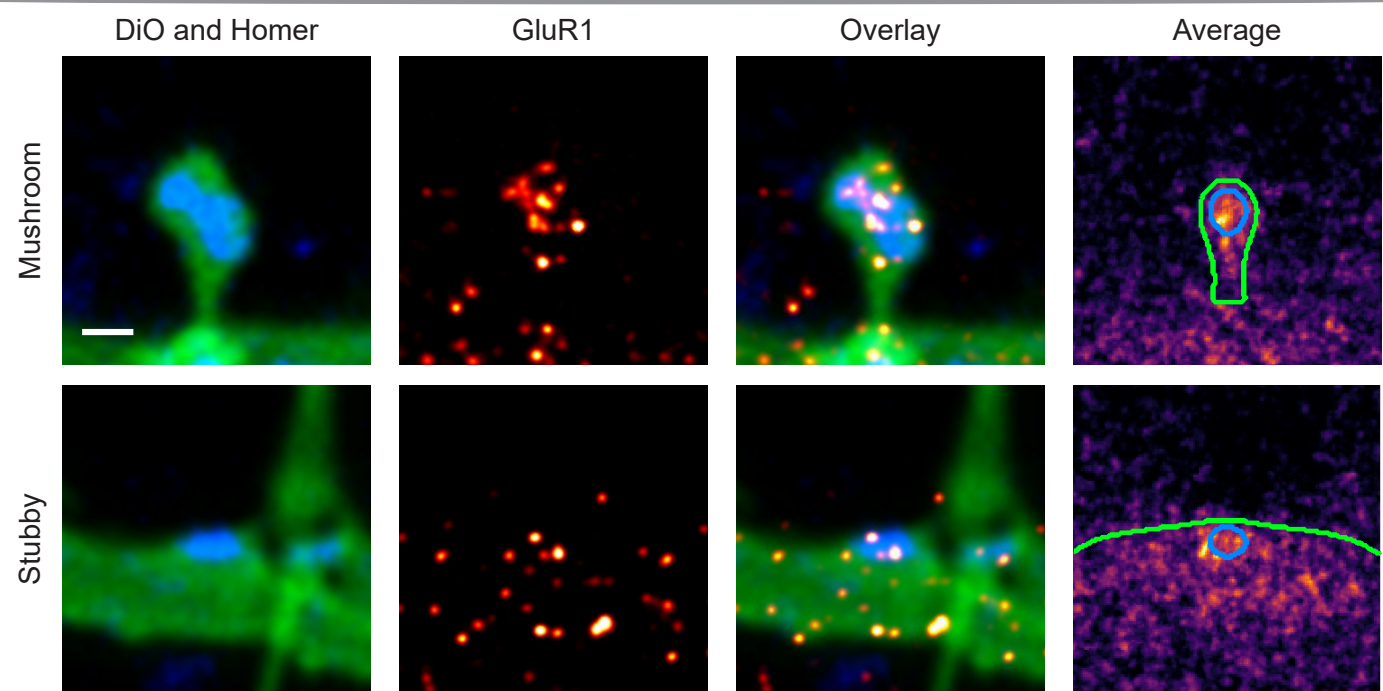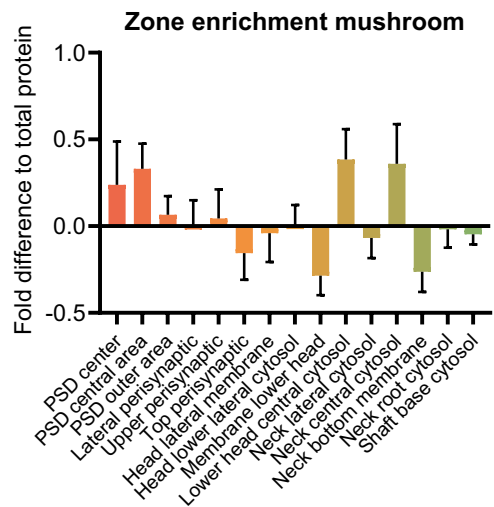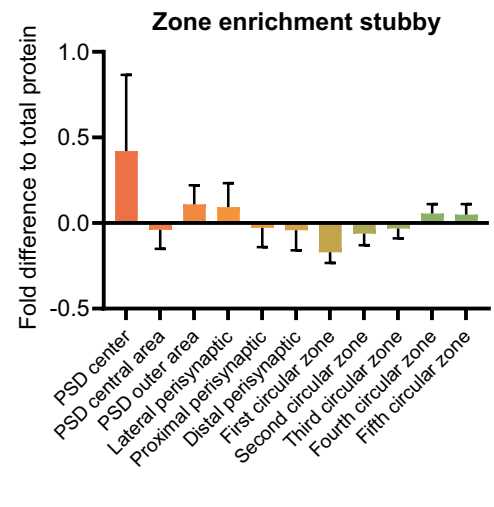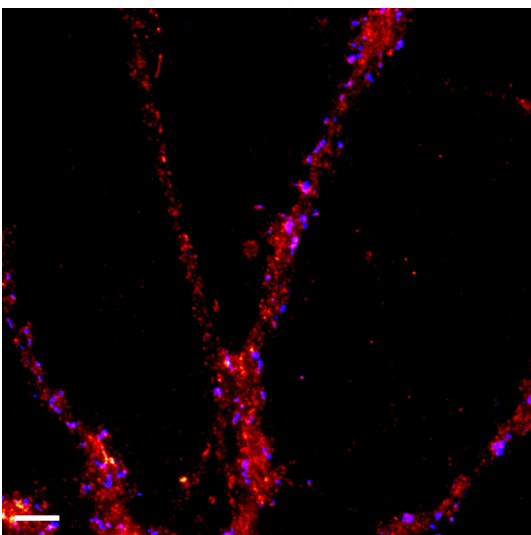

|                        |                                    |              |
|------------------------|------------------------------------|--------------|
| Whole cell copy number | 976411.9 ± 196915.5 (extrapolated) |              |
| Spine copy number      | 279.5 ± 41.8                       |              |
| Function               | Receptor                           |              |
|                        | Mushroom                           | Stubby       |
| Spine copy number      | 236.4 ± 35.4                       | 326.9 ± 48.9 |
| % of total protein     | 0.1 ± 0.0%                         | 0.1 ± 0.0%   |
| Molarity (µM)          | 3.0 ± 0.4                          | 3.1 ± 0.5    |
| PSD copy number        | 62 ± 9.3                           | 47 ± 7.0     |
| % in PSD               | 26.2 ± 3.9%                        | 14.4 ± 2.2%  |

|          | Spine copy number | % of total protein | Molarity ( $\mu\text{M}$ ) | PSD copy number |
|----------|-------------------|--------------------|----------------------------|-----------------|
| Mushroom | $236.4 \pm 35.4$  | $0.1 \pm 0.0\%$    | $3.0 \pm 0.4$              | $62 \pm 9.3$    |
| Stubby   | $326.9 \pm 48.9$  | $0.1 \pm 0.0\%$    | $3.1 \pm 0.5$              | $47 \pm 7.0$    |

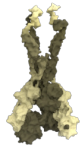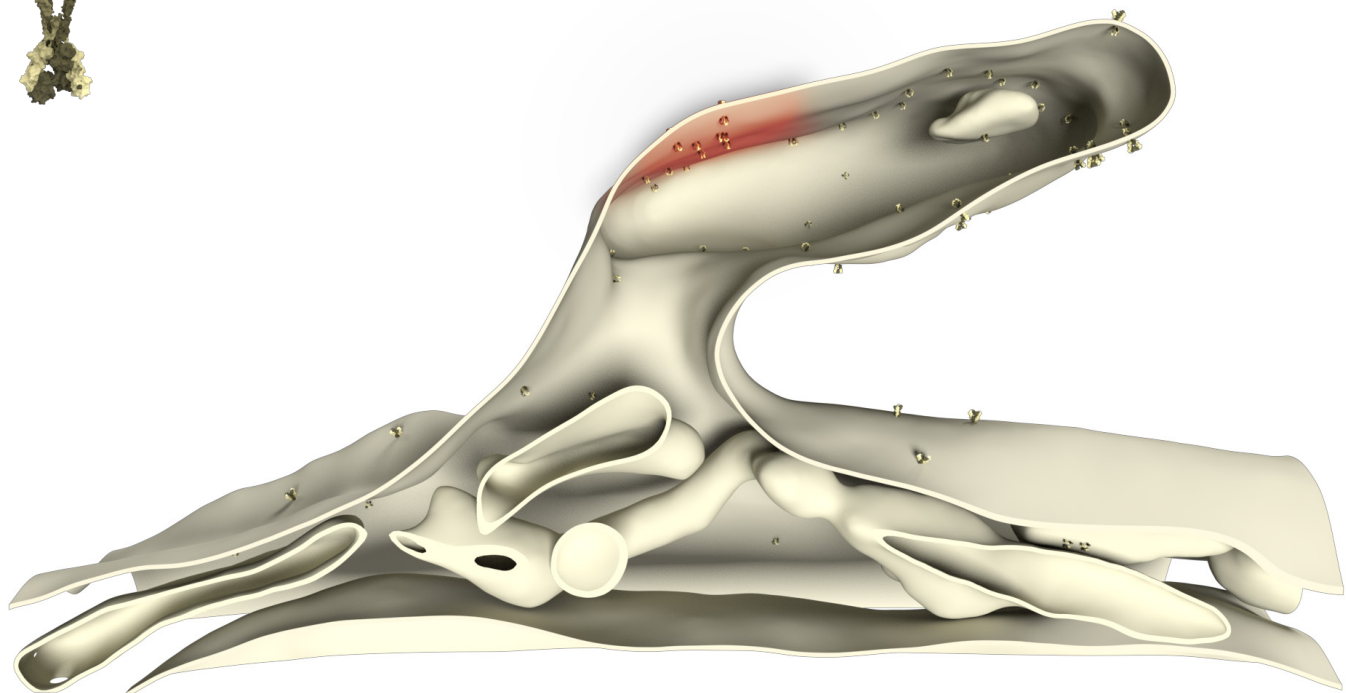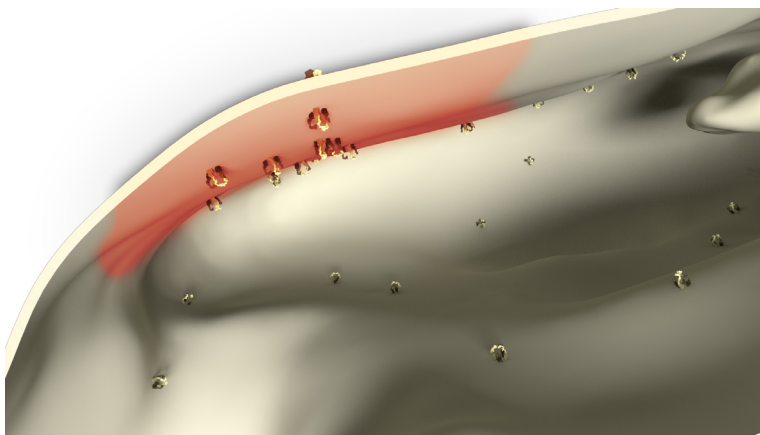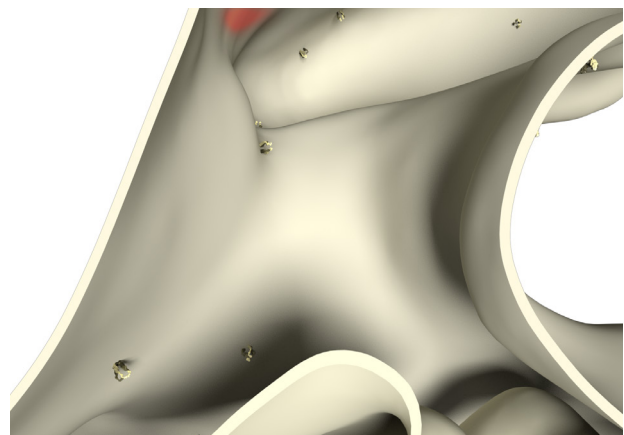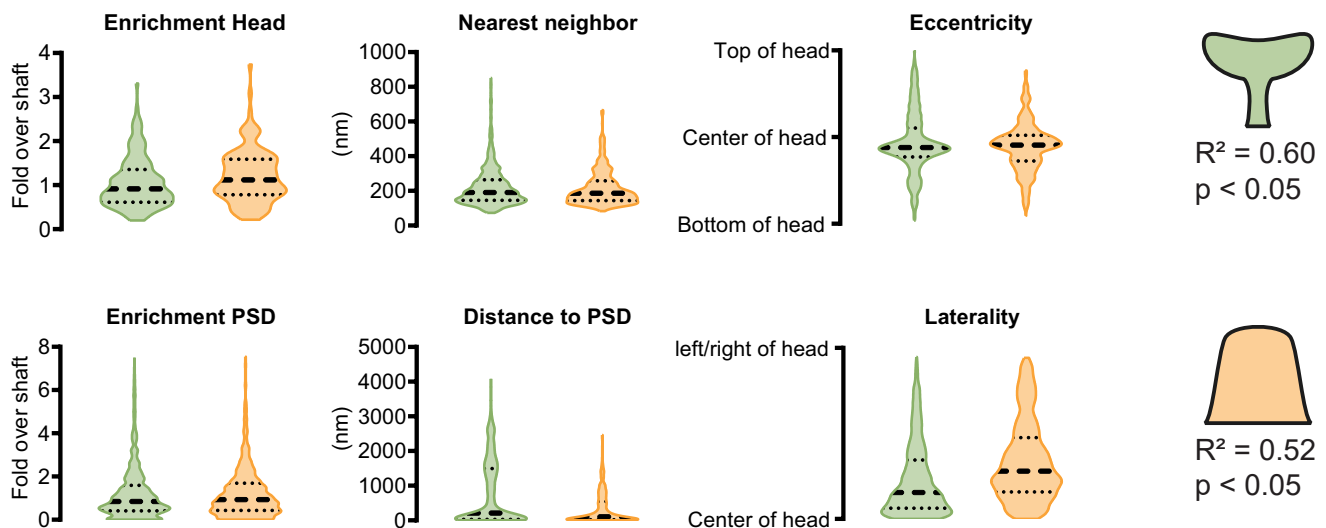

|          | Spine copy number | % of total protein | Molarity ( $\mu\text{M}$ ) | PSD copy number |
|----------|-------------------|--------------------|----------------------------|-----------------|
| Mushroom | $236.4 \pm 35.4$  | $0.1 \pm 0.0\%$    | $3.0 \pm 0.4$              | $62 \pm 9.3$    |
| Stubby   | $326.9 \pm 48.9$  | $0.1 \pm 0.0\%$    | $3.1 \pm 0.5$              | $47 \pm 7.0$    |

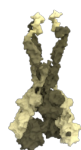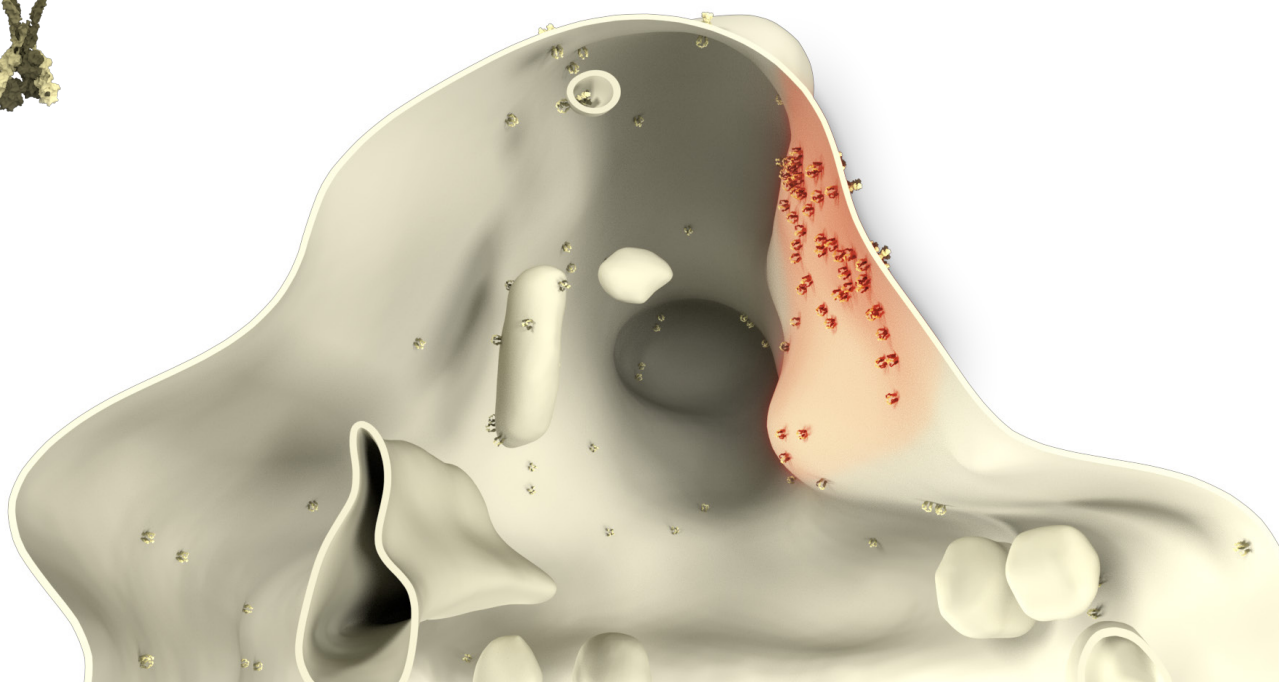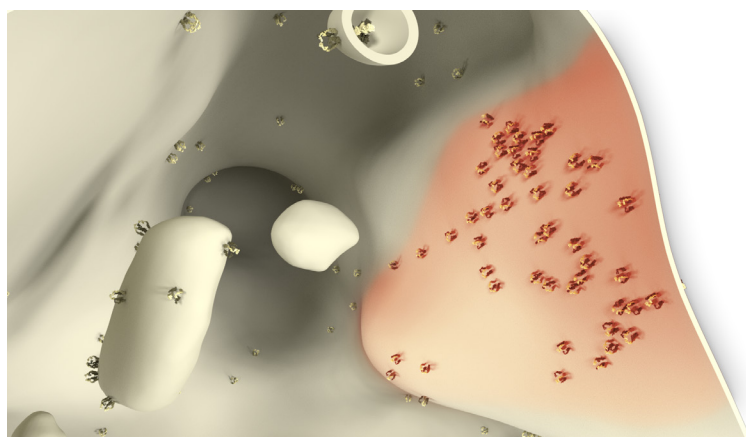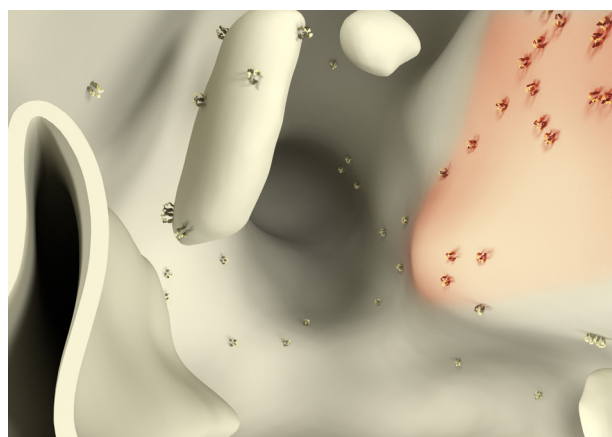

## References

**Antibody:** Synaptic Systems 182 003

**PDB Identifier:** modified GluR2

### Literature:

Nair et al., 2013, J. Neurosci.

MacGillavry et al., 2013, Neuron



**GluR2 (GluA2, Gene: Gria2, Uniprot ID: P19491)**

**Known function:** Part of primary glutamate receptor, Important for plasticity  
**Known organization:** Transmembrane protein, Heterotetramers, Forms 80 nm clusters  
**Known Interactions:** GRIP, NSF, alpha-SNAP, beta-SNAP, Syntaxin13

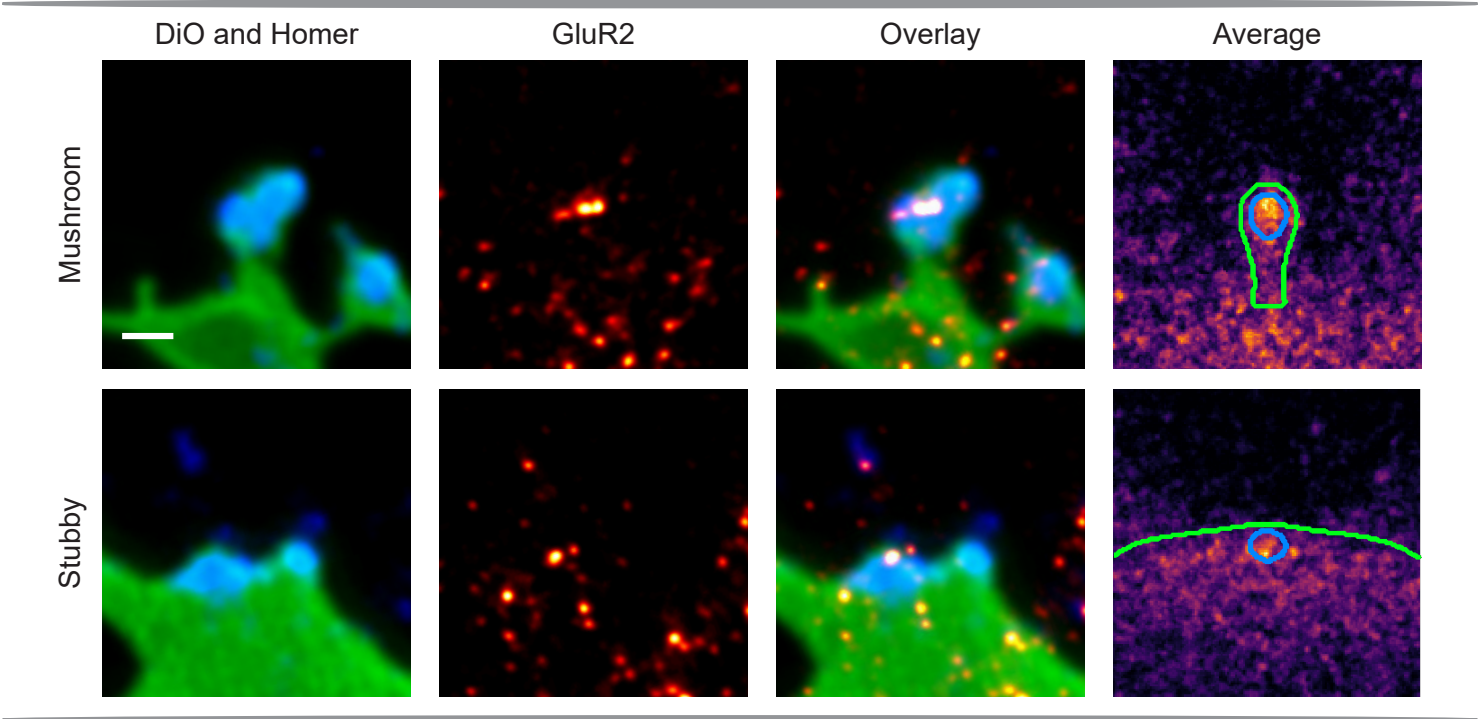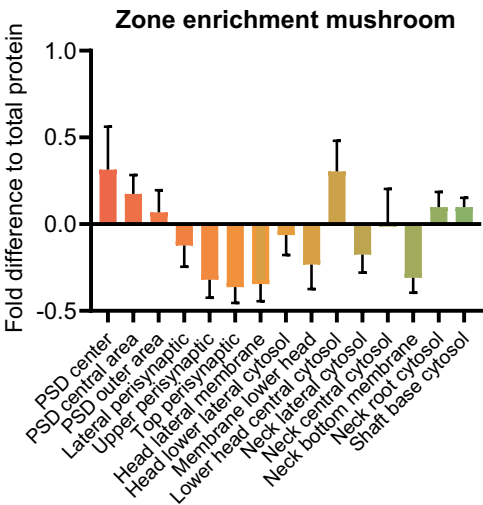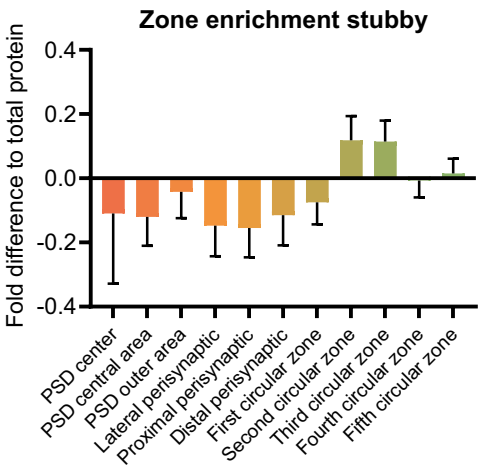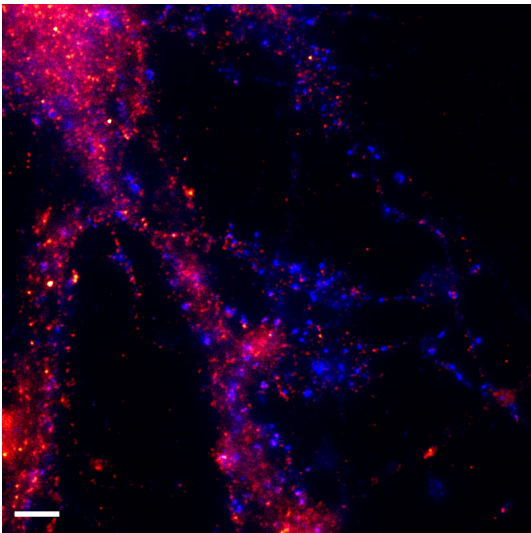

|                        |                                     |                |
|------------------------|-------------------------------------|----------------|
| Whole cell copy number | 4227066.8 ± 612238.7 (extrapolated) |                |
| Spine copy number      | 1082.8 ± 98.5                       |                |
| Function               | Receptor                            |                |
|                        | Mushroom                            | Stubby         |
| Spine copy number      | 872.0 ± 79.3                        | 1411.0 ± 128.3 |
| % of total protein     | 0.4 ± 0.0%                          | 0.6 ± 0.1%     |
| Molarity (μM)          | 11.1 ± 1.0                          | 13.3 ± 1.2     |
| PSD copy number        | 204 ± 18.6                          | 230 ± 20.9     |
| % in PSD               | 23.4 ± 2.1%                         | 16.3 ± 1.5%    |

|          | Spine copy number  | % of total protein | Molarity ( $\mu\text{M}$ ) | PSD copy number |
|----------|--------------------|--------------------|----------------------------|-----------------|
| Mushroom | $872.0 \pm 79.3$   | $0.4 \pm 0.0\%$    | $11.1 \pm 1.0$             | $204 \pm 18.6$  |
| Stubby   | $1411.0 \pm 128.3$ | $0.6 \pm 0.1\%$    | $13.3 \pm 1.2$             | $230 \pm 20.9$  |

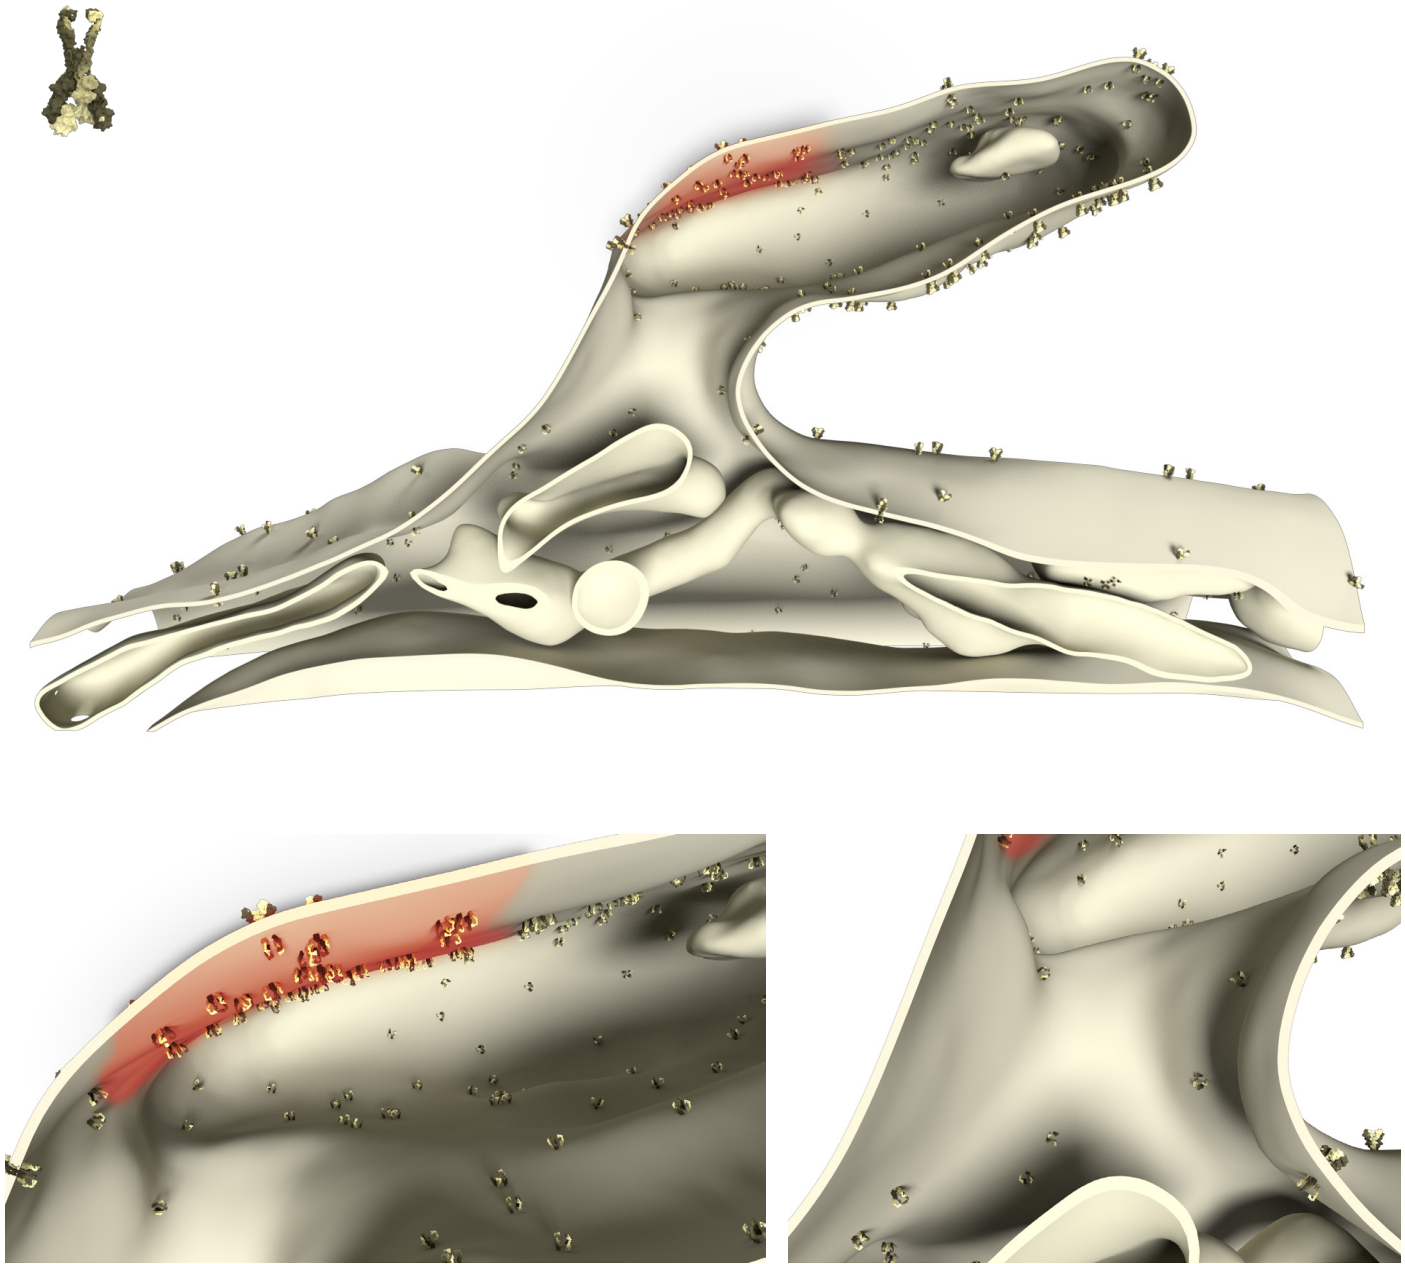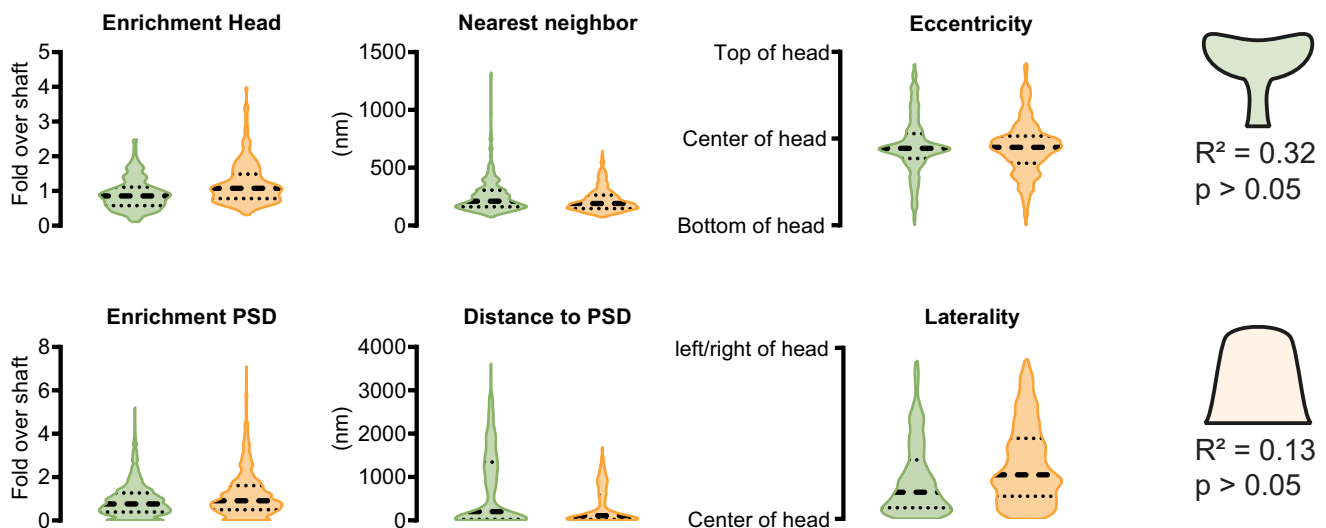

|          | Spine copy number  | % of total protein | Molarity ( $\mu\text{M}$ ) | PSD copy number |
|----------|--------------------|--------------------|----------------------------|-----------------|
| Mushroom | $872.0 \pm 79.3$   | $0.4 \pm 0.0\%$    | $11.1 \pm 1.0$             | $204 \pm 18.6$  |
| Stubby   | $1411.0 \pm 128.3$ | $0.6 \pm 0.1\%$    | $13.3 \pm 1.2$             | $230 \pm 20.9$  |

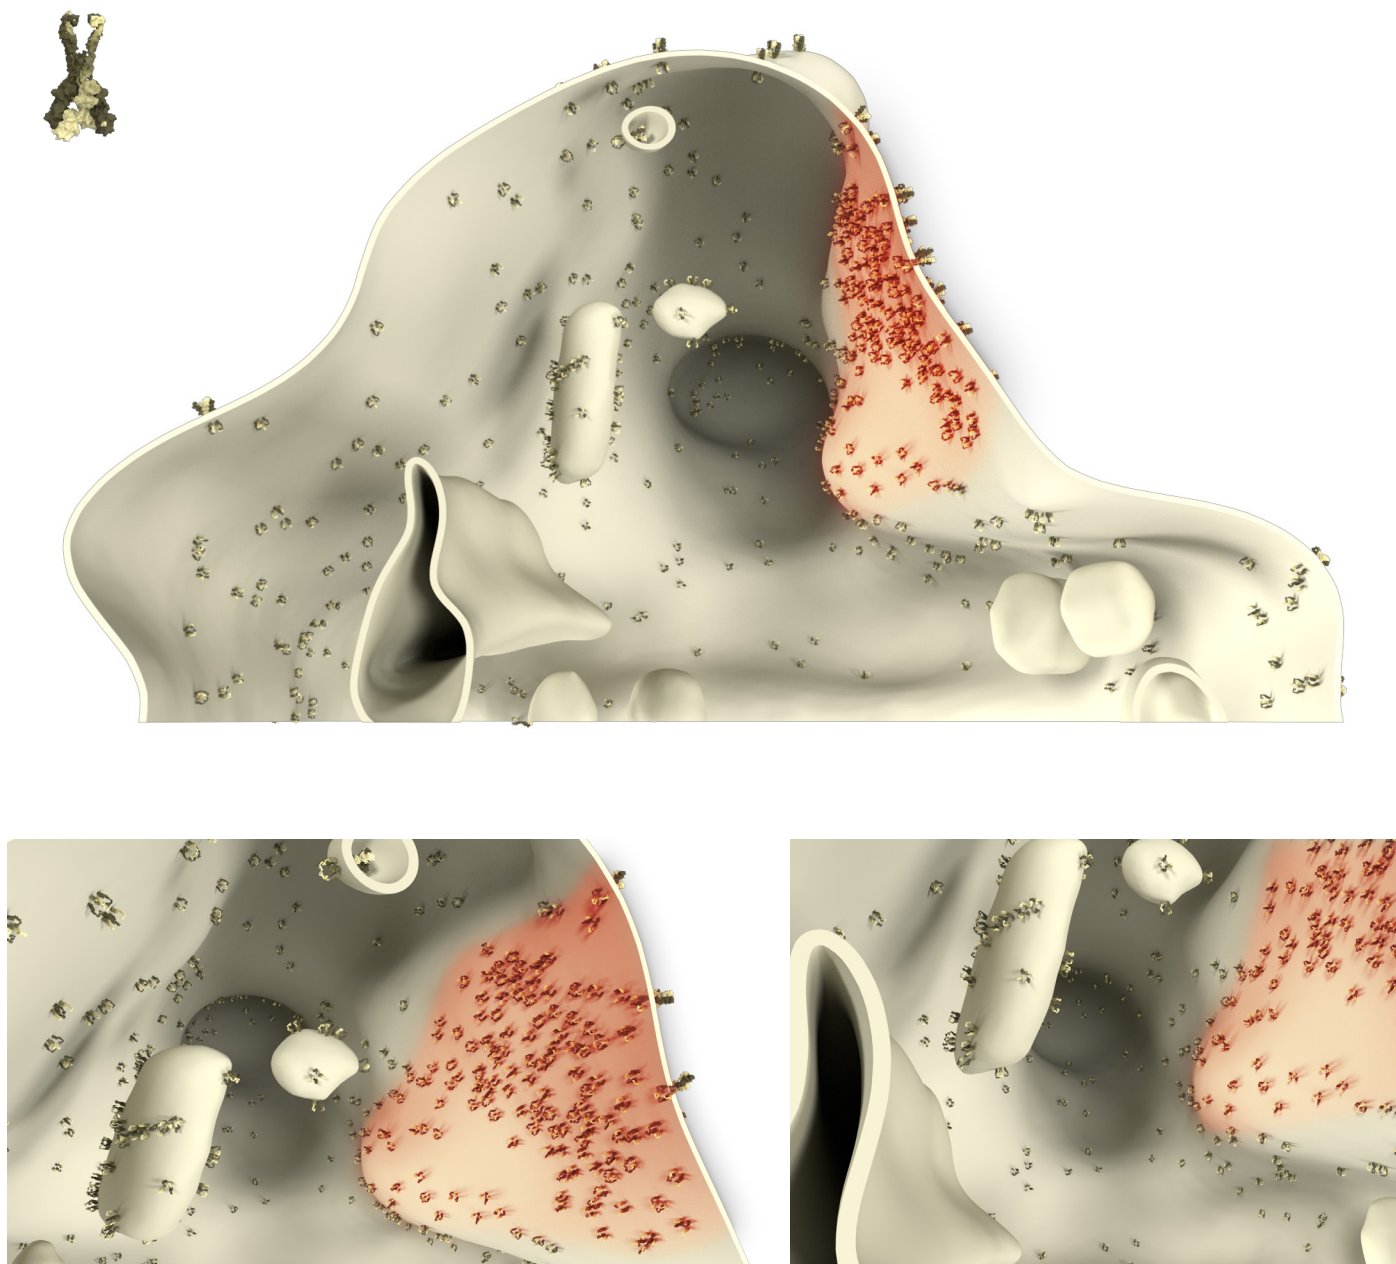

## References

**Antibody:** Alomone Labs AGC-005

**PDB Identifier:** 5l1h

### Literature:

MacGillavry et al., 2013, Neuron

Nair et al., 2013, J. Neurosci.

Kato et al., 2008, Neuron

Lu and Ziff, 2005, Neuron

Osten et al., 1998, Neuron

Hirbec et al., 2002, J. Biol. Chem.



### Known Interactions: GRIP

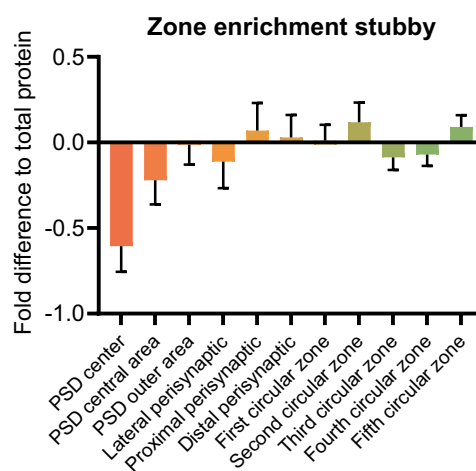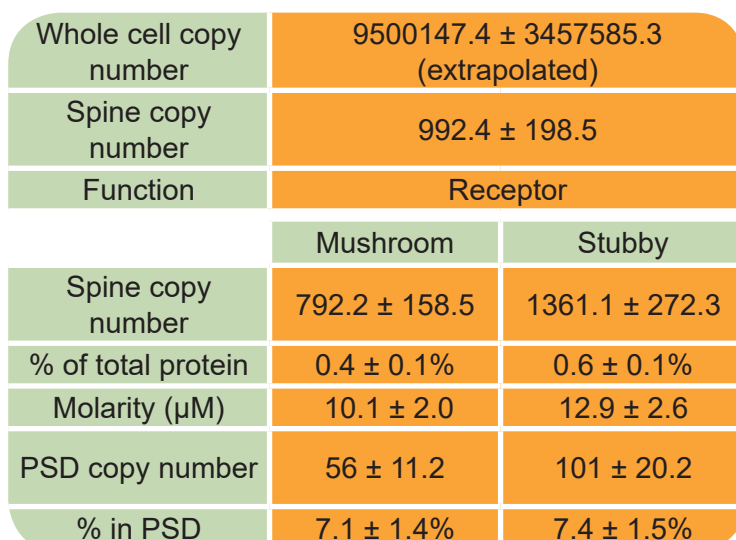

|          | Spine copy number  | % of total protein | Molarity ( $\mu\text{M}$ ) | PSD copy number |
|----------|--------------------|--------------------|----------------------------|-----------------|
| Mushroom | $792.2 \pm 158.5$  | $0.4 \pm 0.1\%$    | $10.1 \pm 2.0$             | $56 \pm 11.2$   |
| Stubby   | $1361.1 \pm 272.3$ | $0.6 \pm 0.1\%$    | $12.9 \pm 2.6$             | $101 \pm 20.2$  |

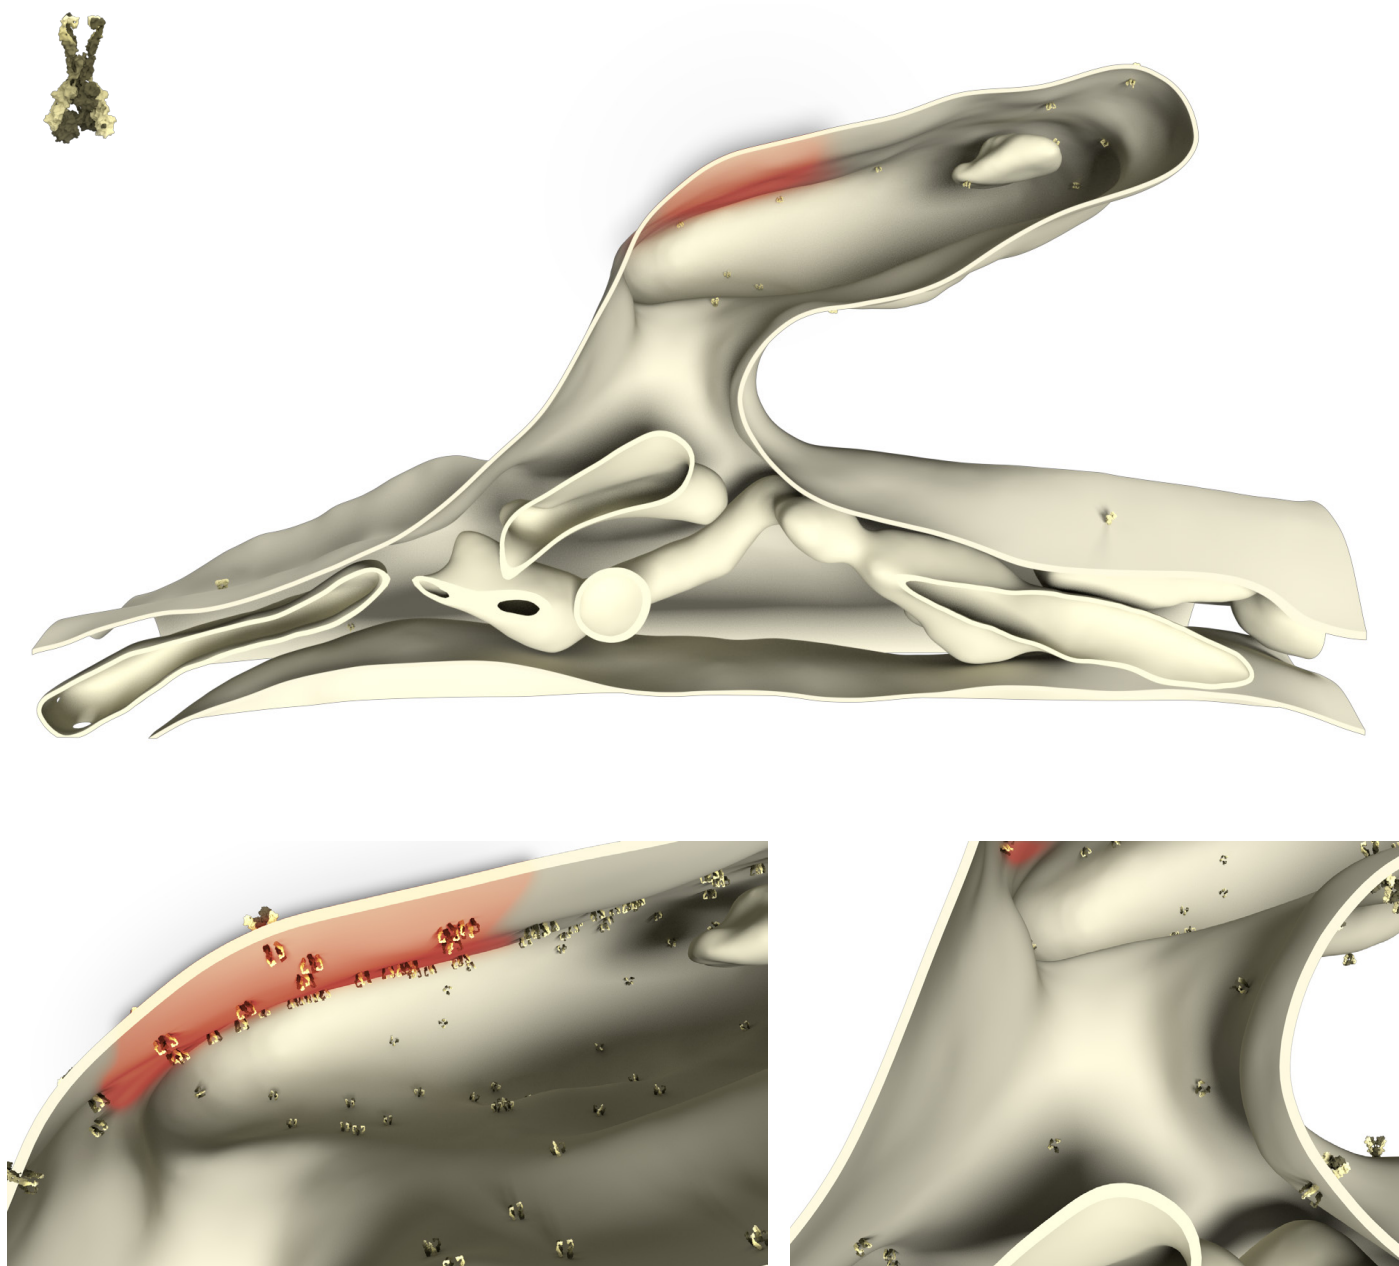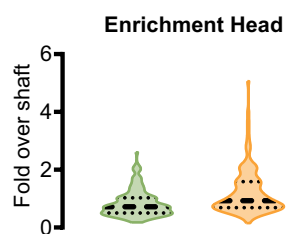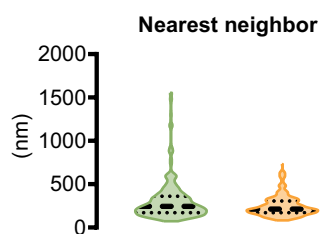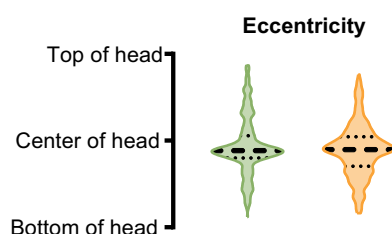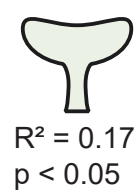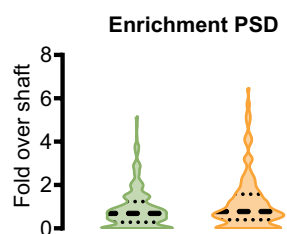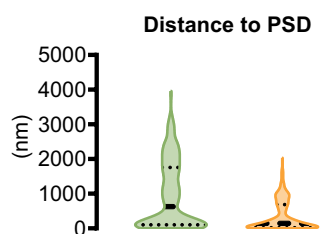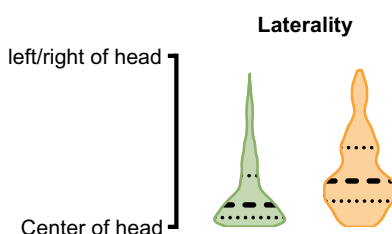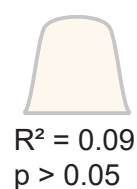

|          | Spine copy number  | % of total protein | Molarity ( $\mu\text{M}$ ) | PSD copy number |
|----------|--------------------|--------------------|----------------------------|-----------------|
| Mushroom | $792.2 \pm 158.5$  | $0.4 \pm 0.1\%$    | $10.1 \pm 2.0$             | $56 \pm 11.2$   |
| Stubby   | $1361.1 \pm 272.3$ | $0.6 \pm 0.1\%$    | $12.9 \pm 2.6$             | $101 \pm 20.2$  |

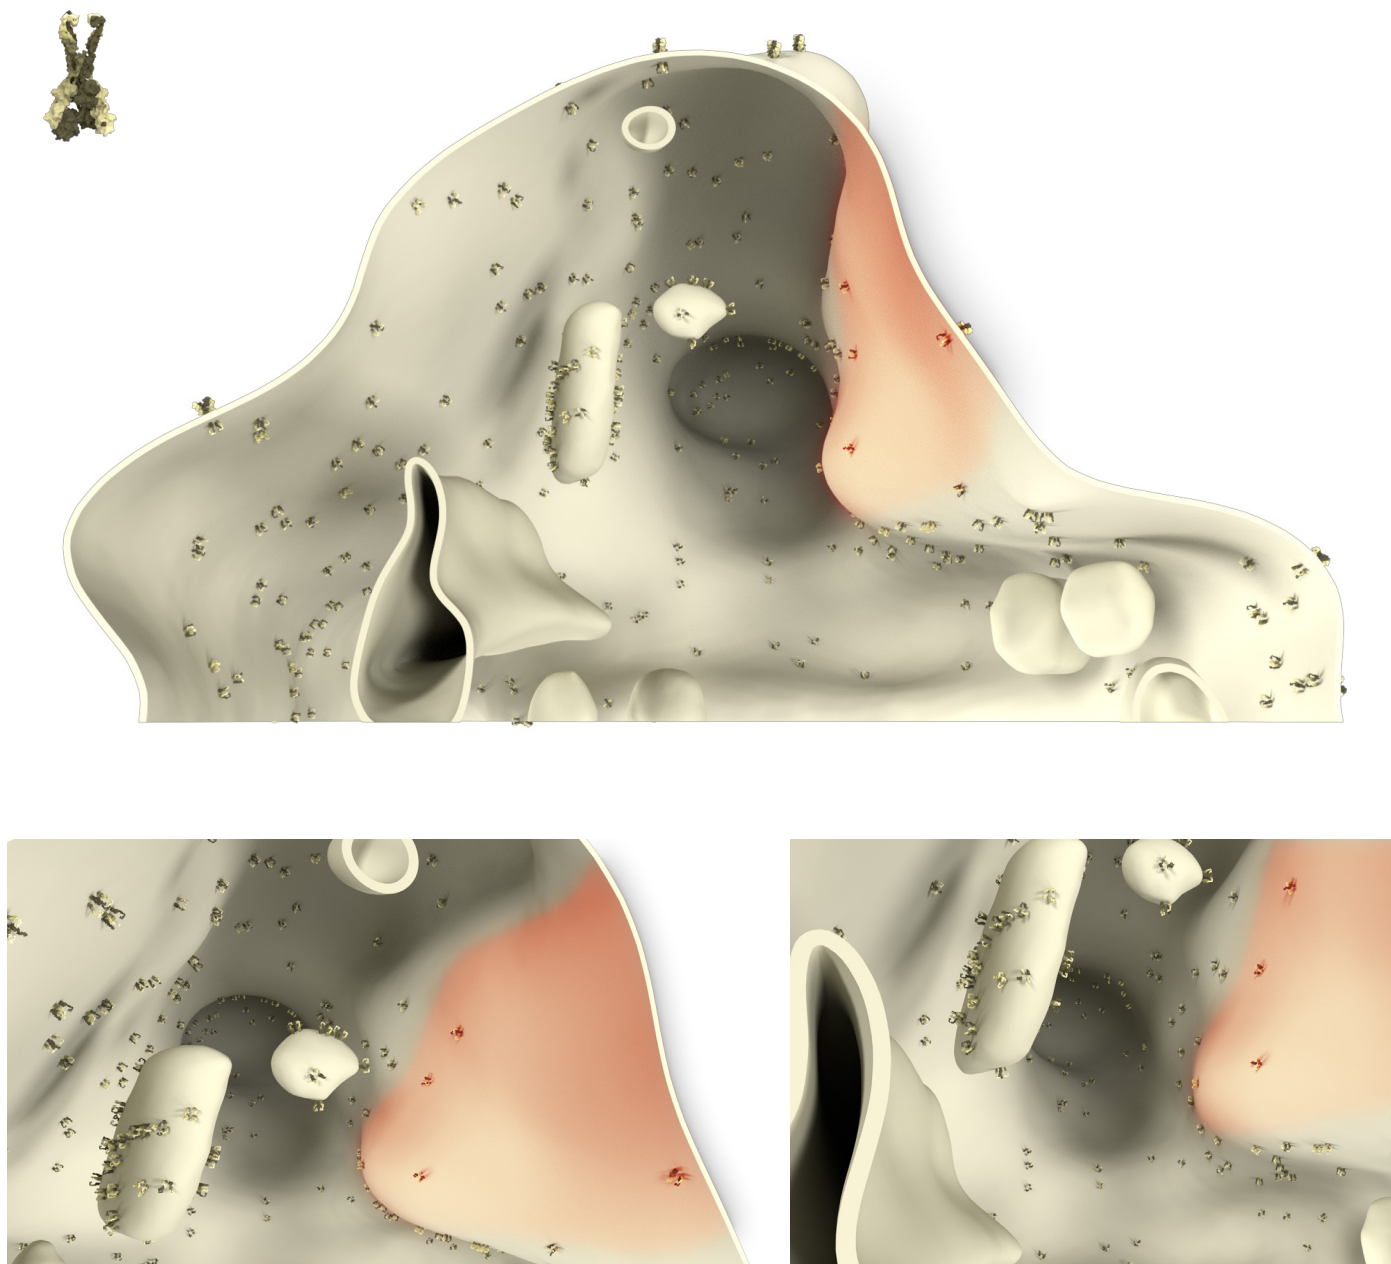

## References

**Antibody:** Invitrogen 32-0400

**PDB Identifier:** modified GluR2

### Literature:

Nair et al., 2013, J. Neurosci.

Xia et al., 1999, Neuron

Hirbec et al., 2002, J. Biol. Chem.

MacGillavry et al., 2013, Neuron



GRIP1/2 (Genes: Grip1, Grip2, Uniprot ID: P97879, Q9WTW1)

Known function: Controls AMPA and kainate receptor trafficking

Known organization: Cytosolic

Known Interactions: AMPA and kainate receptors

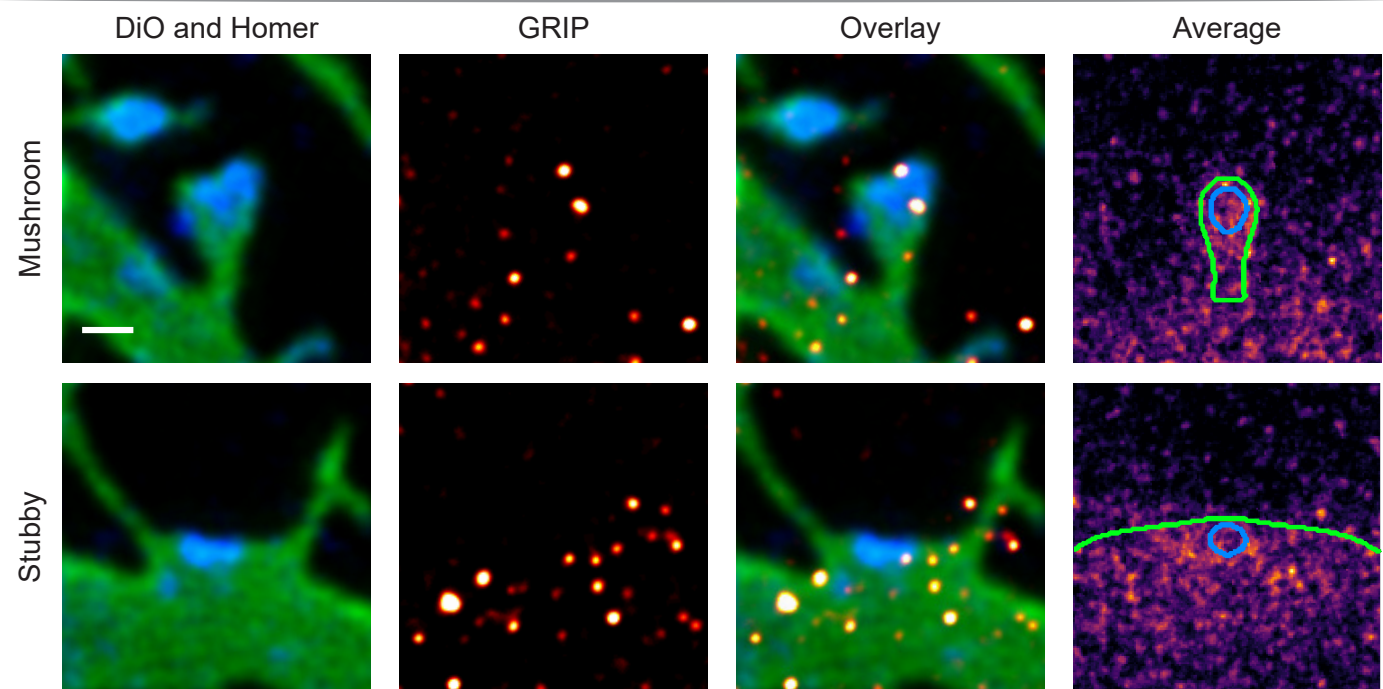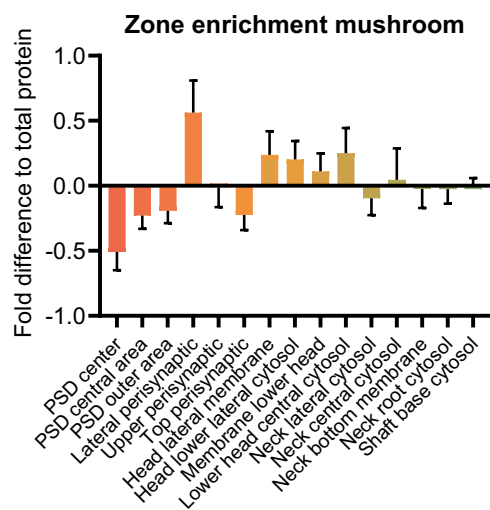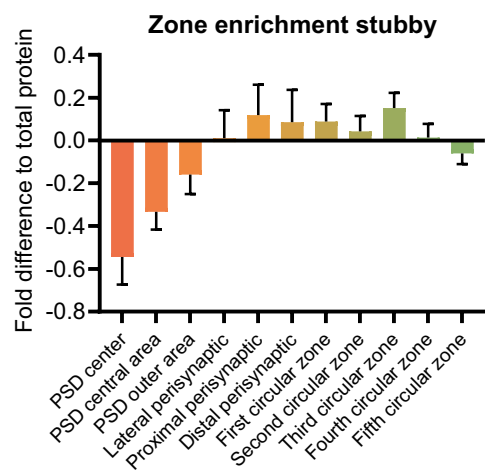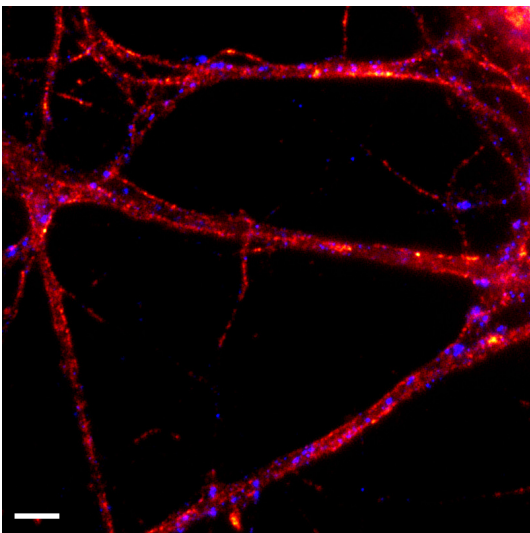

|                        |                            |            |
|------------------------|----------------------------|------------|
| Whole cell copy number | 77266.0 ± 16985.7          |            |
| Spine copy number      | 5.0 ± 1.8                  |            |
| Function               | Exo-/Endocytosis cofactors |            |
|                        | Mushroom                   | Stubby     |
| Spine copy number      | 4.4 ± 1.5                  | 6.1 ± 2.1  |
| % of total protein     | 0.0 ± 0.0%                 | 0.0 ± 0.0% |
| Molarity (μM)          | 0.1 ± 0.0                  | 0.1 ± 0.0  |
| PSD copy number        | 0 ± 0.0                    | 0 ± 0.0    |
| % in PSD               | 0.0 ± 0.0%                 | 0.0 ± 0.0% |

|          | Spine copy number | % of total protein | Molarity ( $\mu\text{M}$ ) | PSD copy number |
|----------|-------------------|--------------------|----------------------------|-----------------|
| Mushroom | $4.4 \pm 1.5$     | $0.0 \pm 0.0\%$    | $0.1 \pm 0.0$              | $0 \pm 0.0$     |
| Stubby   | $6.1 \pm 2.1$     | $0.0 \pm 0.0\%$    | $0.1 \pm 0.0$              | $0 \pm 0.0$     |

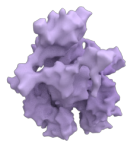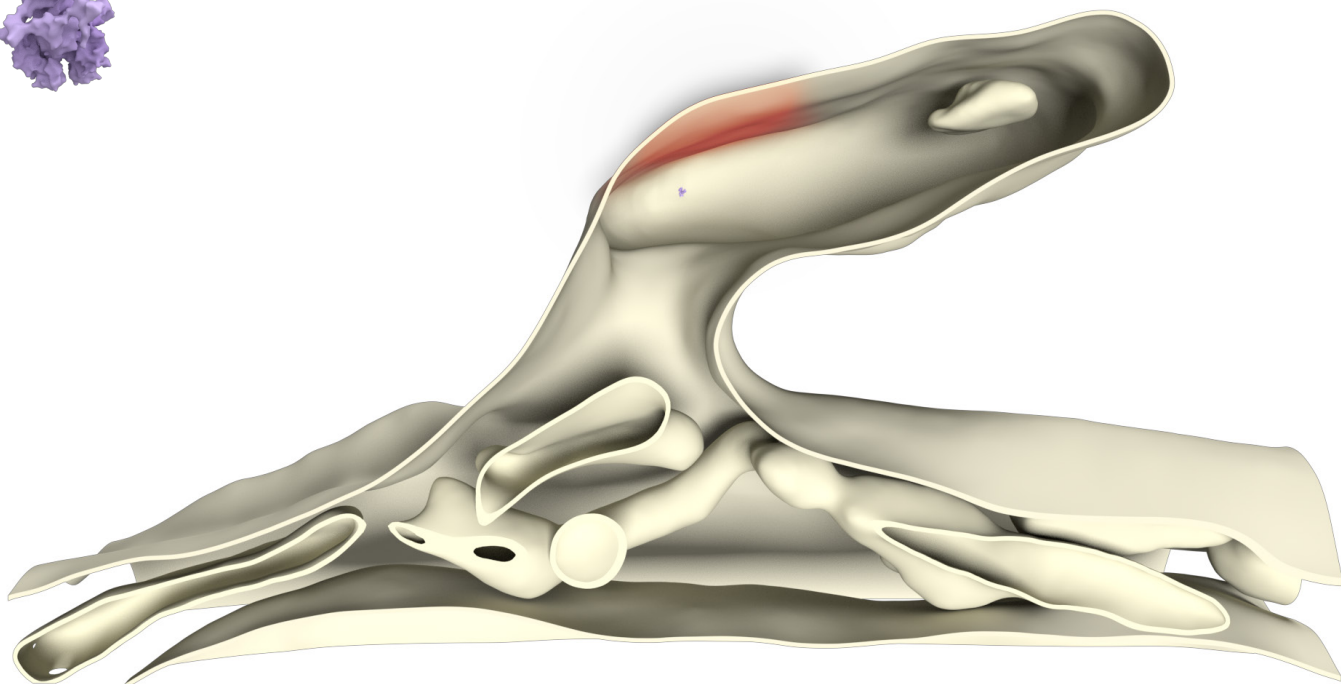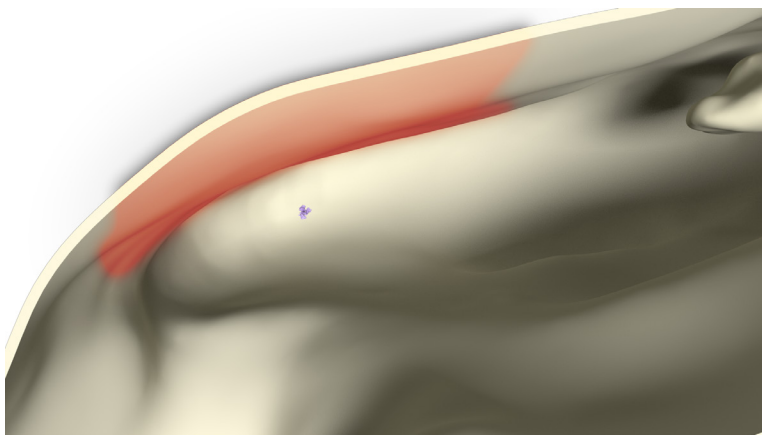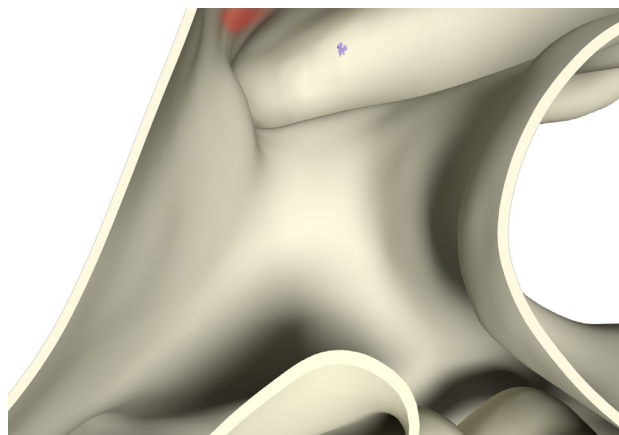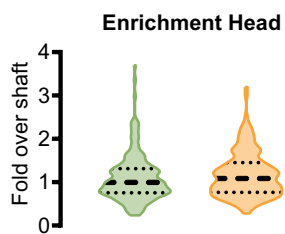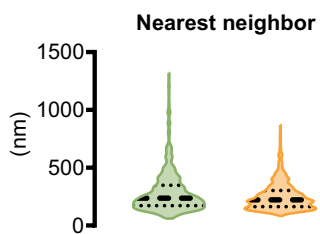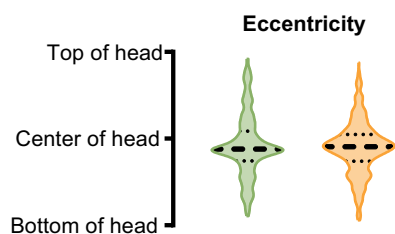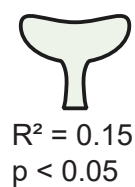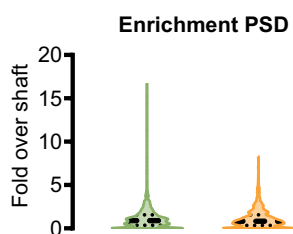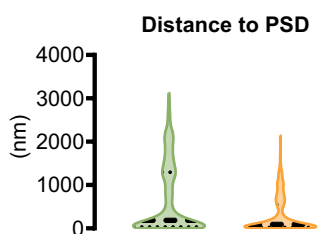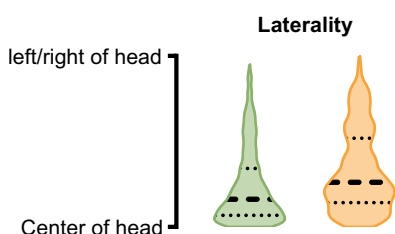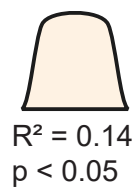

|          | Spine copy number | % of total protein | Molarity ( $\mu\text{M}$ ) | PSD copy number |
|----------|-------------------|--------------------|----------------------------|-----------------|
| Mushroom | $4.4 \pm 1.5$     | $0.0 \pm 0.0\%$    | $0.1 \pm 0.0$              | $0 \pm 0.0$     |
| Stubby   | $6.1 \pm 2.1$     | $0.0 \pm 0.0\%$    | $0.1 \pm 0.0$              | $0 \pm 0.0$     |

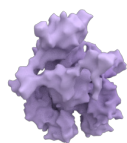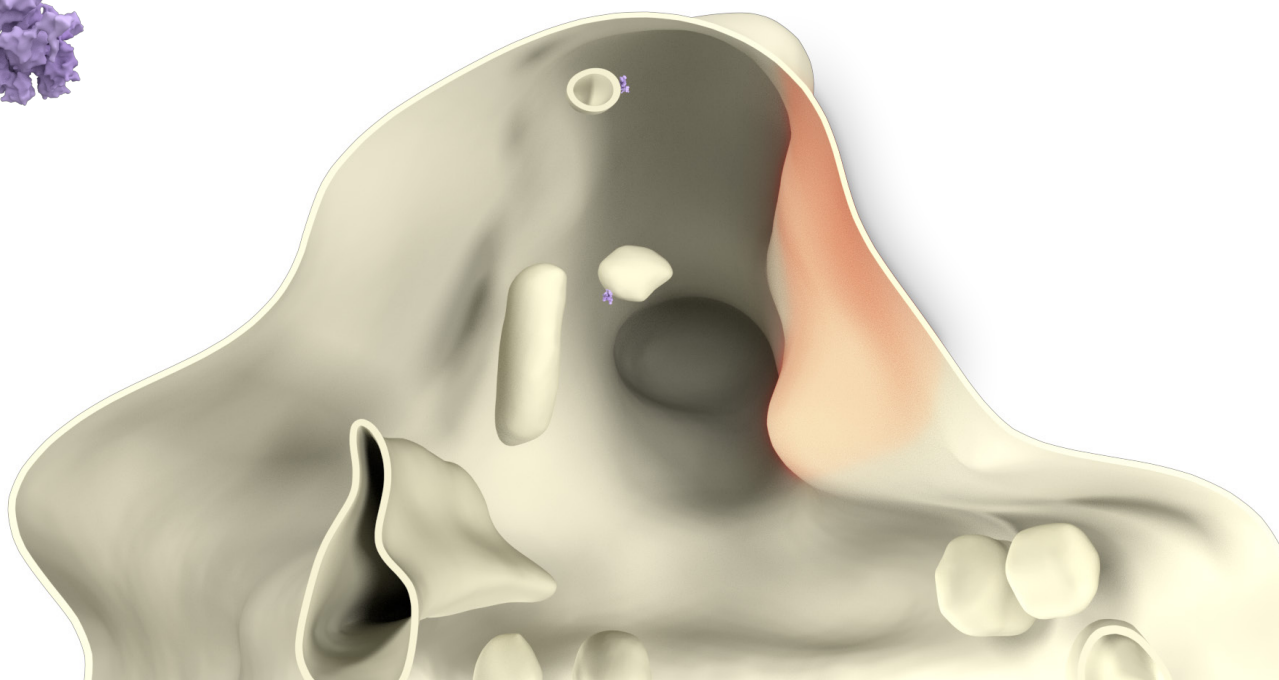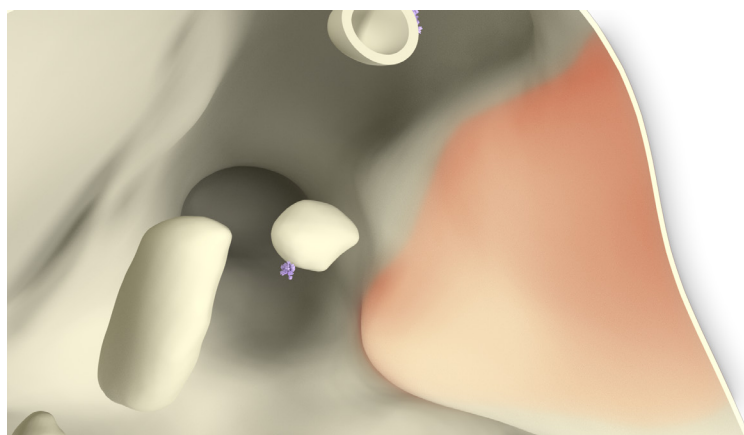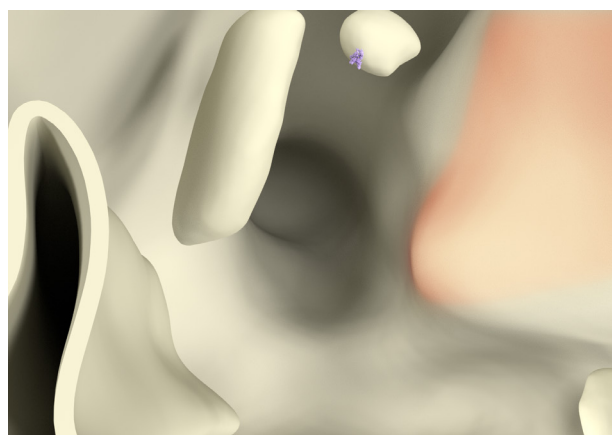

## References

**Antibody:** Synaptic Systems 151 003

**PDB Identifier:** 2qt5, 1p1d, 1n7e, 1m5z

### Literature:

Braithwaite et al., 2002, Proc. Natl. Acad. Sci. U S A

Dong et al., 1997, Nature

Dong et al., 1999, Ann. N Y Acad. Sci.

Hanley and Henley, 2010, Neurosci. Lett.



**Homer1 (PSD-Zip45, Ves11, Gene: Homer1, Uniprot: Q9Z214)**

**Known function:** Scaffold protein, Links mGluR to downstream targets, Homer1a regulates this interaction as a dominant negative isoform

**Known organization:** Cytosolic, Directly below PSD, Selfmultimerizes, Forms mesh with Shank proteins

**Known Interactions:** mGluR, Shank proteins, Dynamin 3

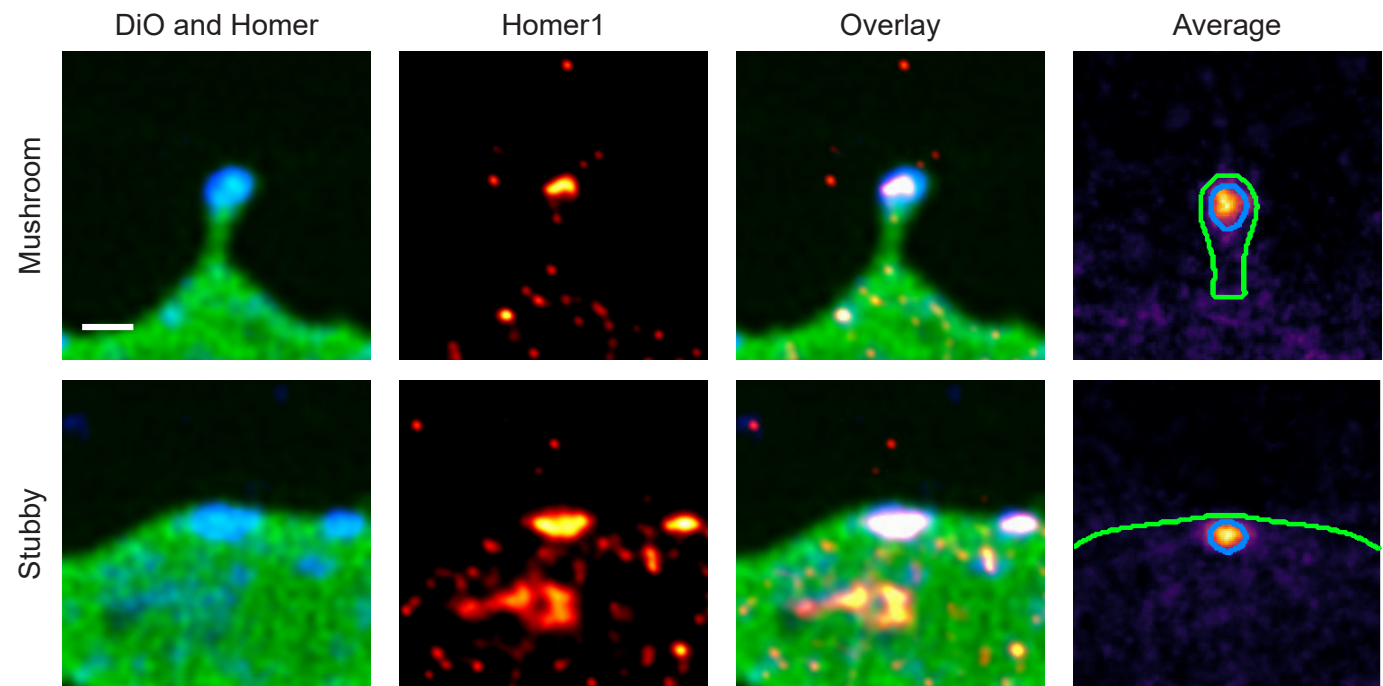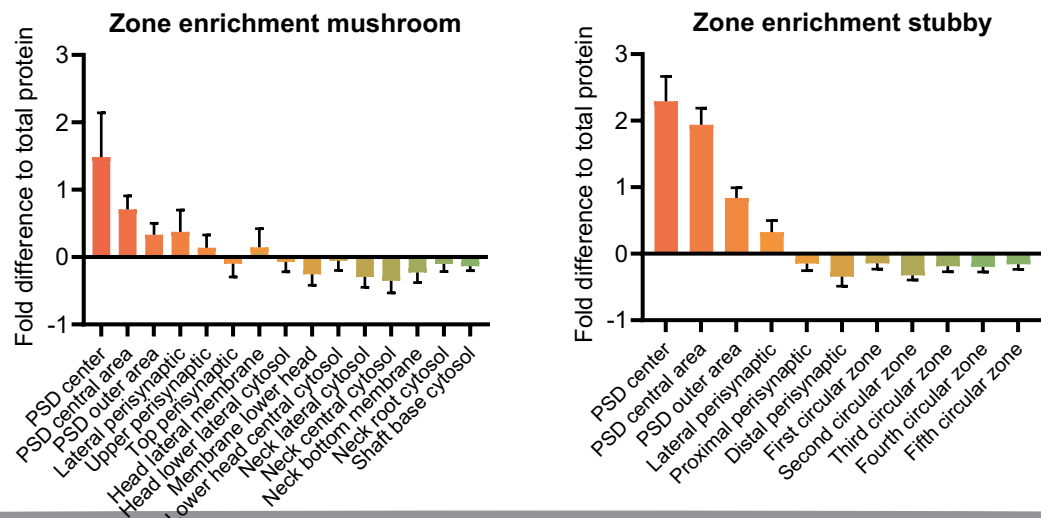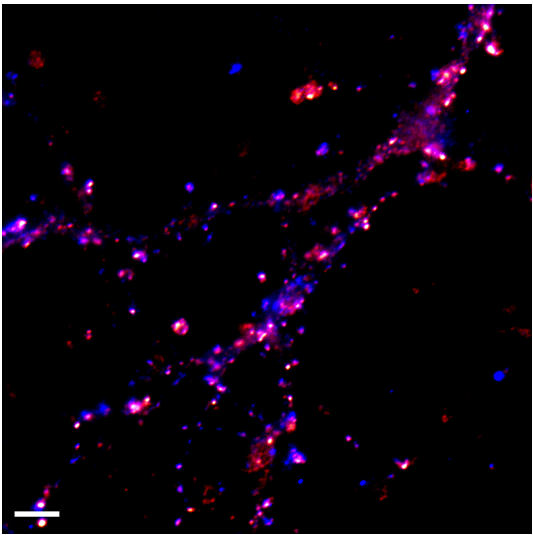

|                        |                      |                |
|------------------------|----------------------|----------------|
| Whole cell copy number | 1523247.1 ± 206153.6 |                |
| Spine copy number      | 1729.9 ± 270.1       |                |
| Function               | PSD Scaffold         |                |
|                        | Mushroom             | Stubby         |
| Spine copy number      | 1255.4 ± 196.0       | 2700.6 ± 421.6 |
| % of total protein     | 0.3 ± 0.0%           | 0.5 ± 0.1%     |
| Molarity (µM)          | 15.9 ± 2.5           | 25.5 ± 4.0     |
| PSD copy number        | 747 ± 116.6          | 1879 ± 293.3   |
| % in PSD               | 59.5 ± 9.3%          | 69.6 ± 10.9%   |

|          | Spine copy number  | % of total protein | Molarity ( $\mu\text{M}$ ) | PSD copy number  |
|----------|--------------------|--------------------|----------------------------|------------------|
| Mushroom | $1255.4 \pm 196.0$ | $0.3 \pm 0.0\%$    | $15.9 \pm 2.5$             | $747 \pm 116.6$  |
| Stubby   | $2700.6 \pm 421.6$ | $0.5 \pm 0.1\%$    | $25.5 \pm 4.0$             | $1879 \pm 293.3$ |

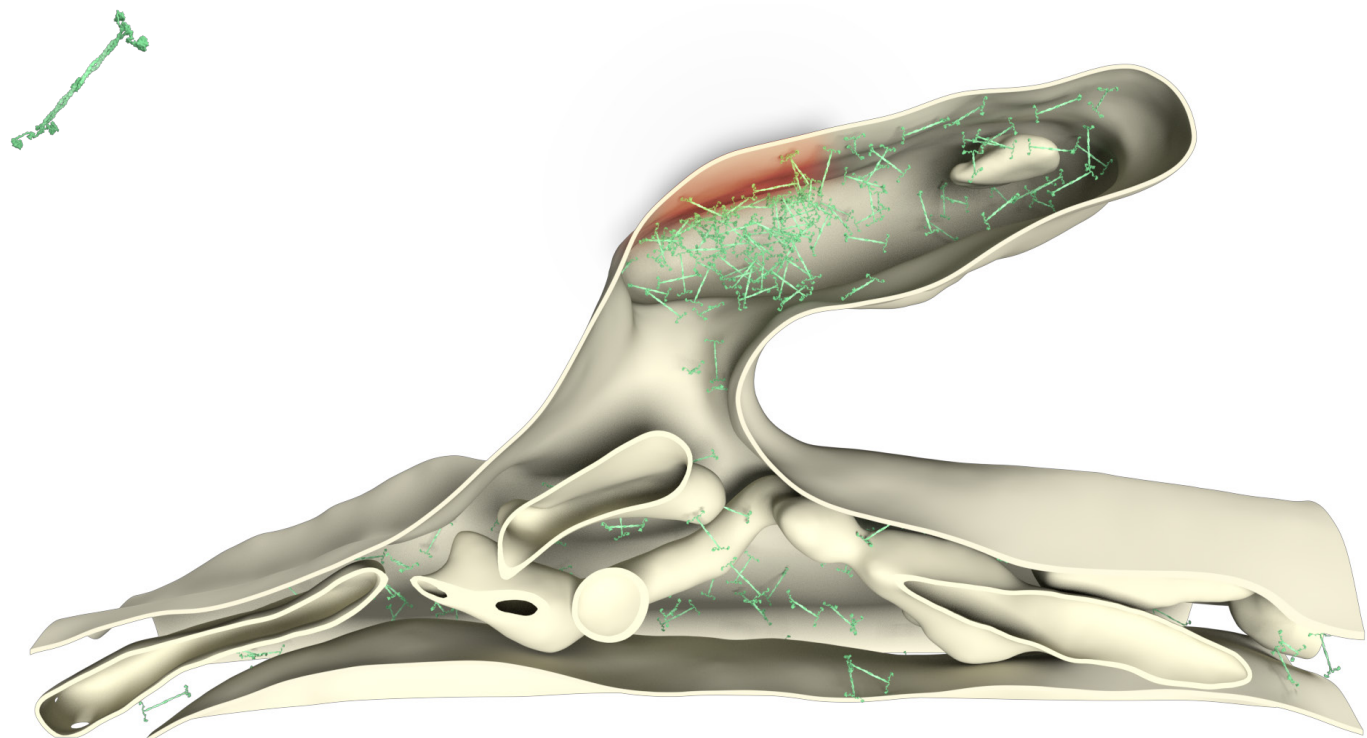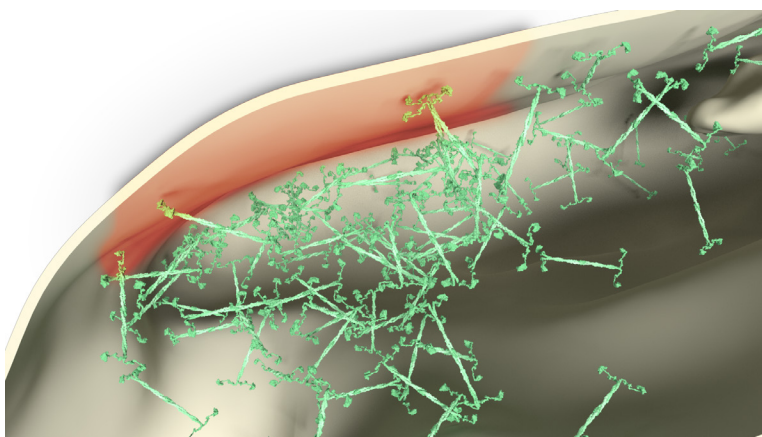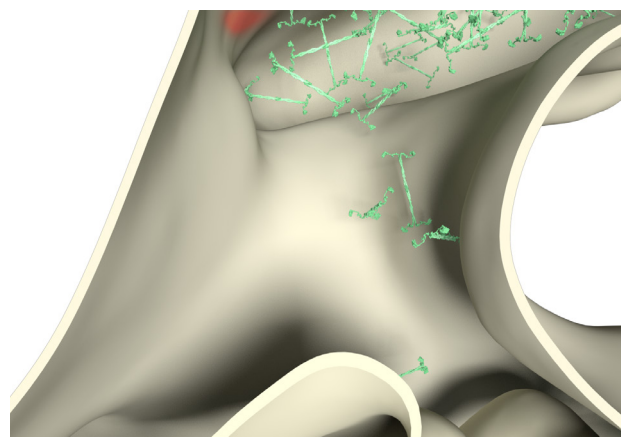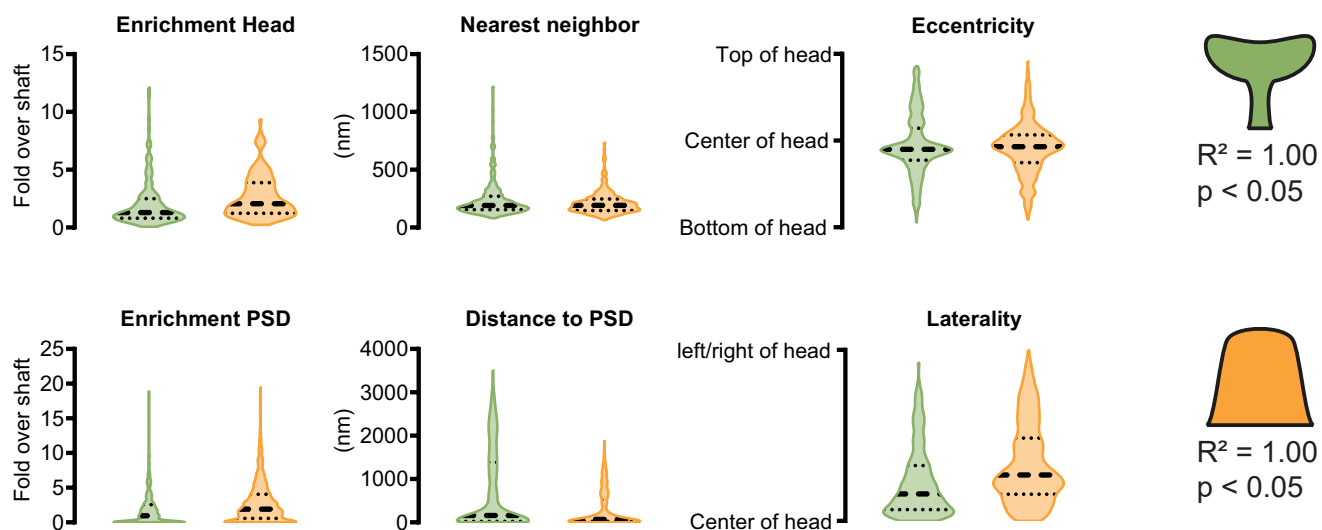

|          | Spine copy number  | % of total protein | Molarity ( $\mu\text{M}$ ) | PSD copy number  |
|----------|--------------------|--------------------|----------------------------|------------------|
| Mushroom | $1255.4 \pm 196.0$ | $0.3 \pm 0.0\%$    | $15.9 \pm 2.5$             | $747 \pm 116.6$  |
| Stubby   | $2700.6 \pm 421.6$ | $0.5 \pm 0.1\%$    | $25.5 \pm 4.0$             | $1879 \pm 293.3$ |

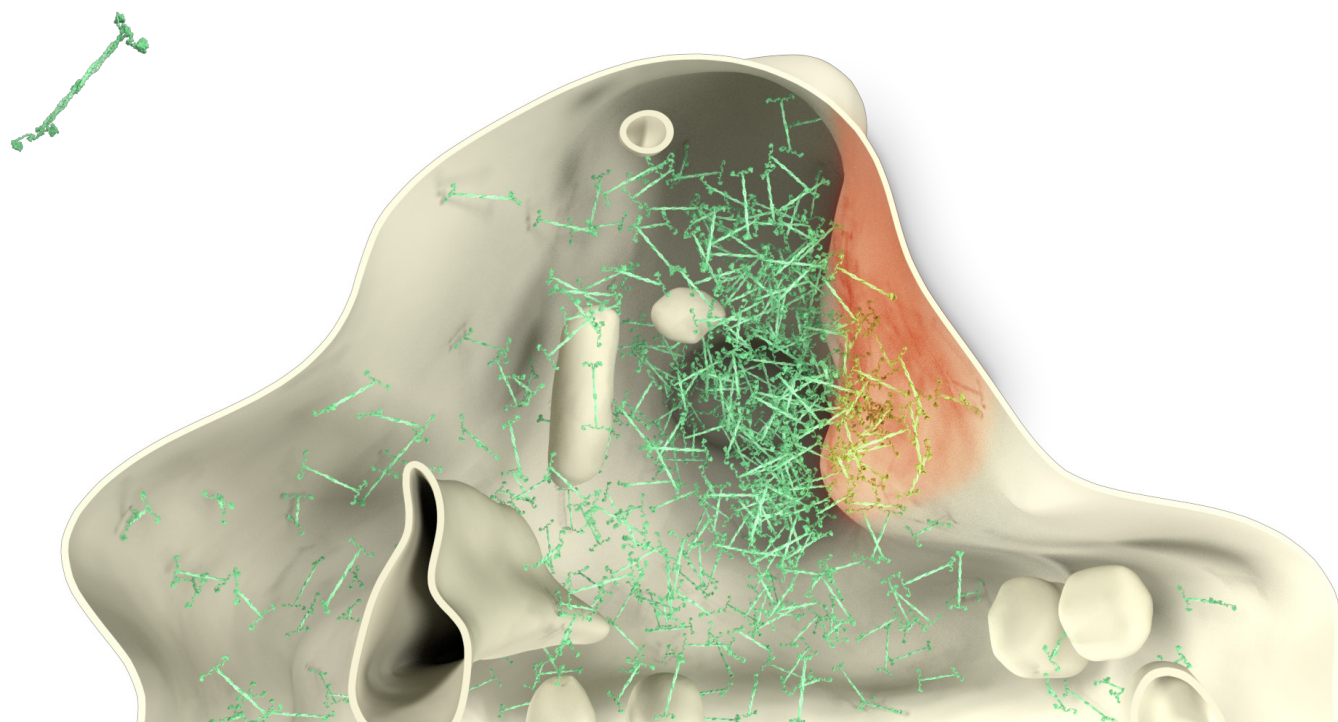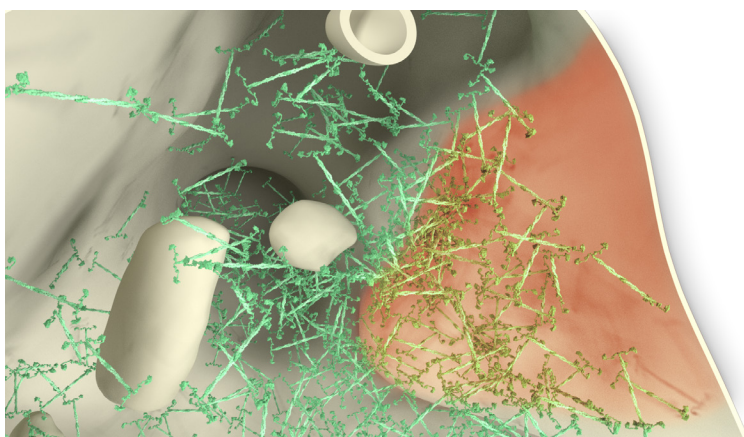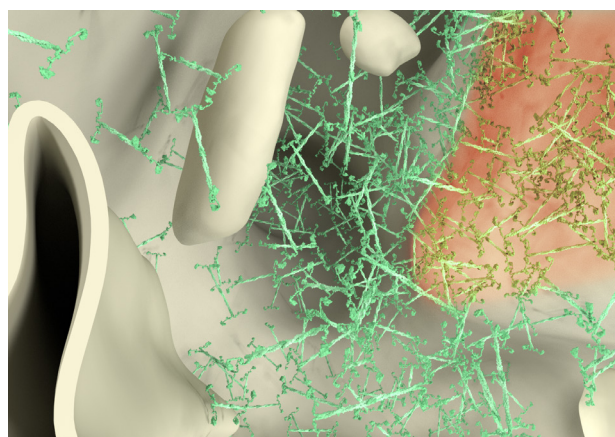

## References

**Antibody:** Synaptic Systems 160 011 and 160 003 **PDB Identifier:** 3cve

### Literature:

Dani et al., 2010, Neuron

Hayashi et al., 2006, J. Neurosci.

Hayashi et al., 2009, Cell

Kato et al., 1998, J. Biol. Chem.

Lu et al., 2007, Neuron

MacGillavry et al., 2013, Neuron

Newpher and Ehlers, 2008, Neuron

Roche et al., 1999, J. Biol. Chem.

Tao-Cheng et al., 2014, Neuroscience

Tu et al., 1998, Neuron

Xiao et al., 1998, Neuron



**Homer2 (Vesl2, Cupidin, Gene: Homer2 , Uniprot ID: O88801)**

**Known function:** Scaffold protein, Links mGluR to downstream targets

**Known organization:** Cytosolic, Directly below PSD, Selfmultimerizes (Dimer of dimers), Forms mesh like structure with Shank proteins

**Known Interactions:** mGluR, Shank proteins, Dynamin 3

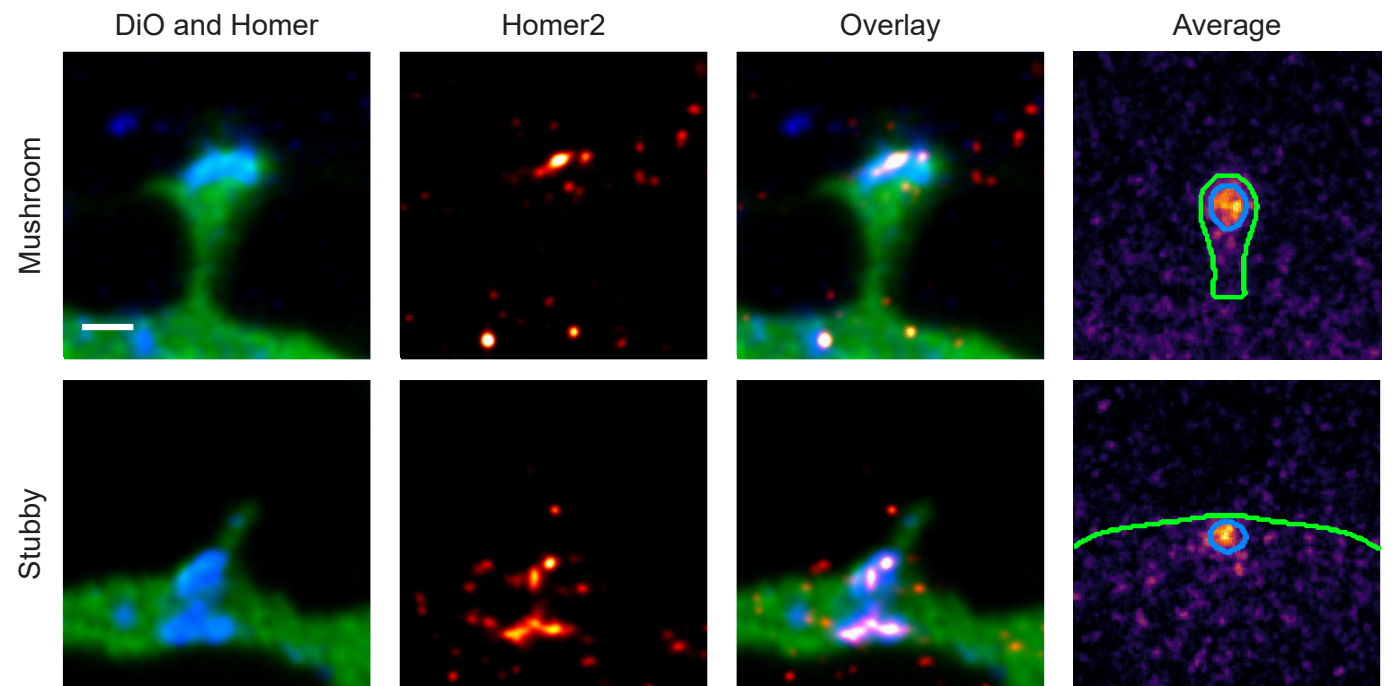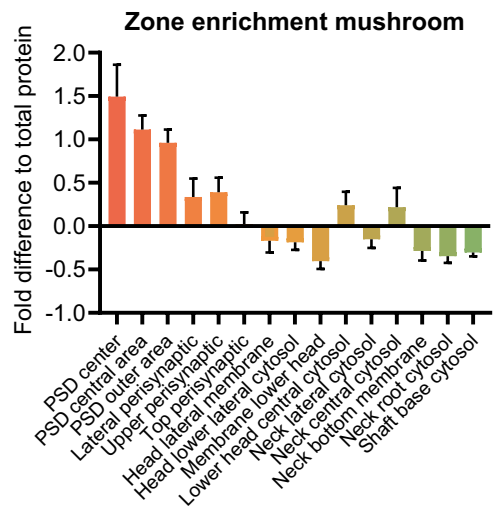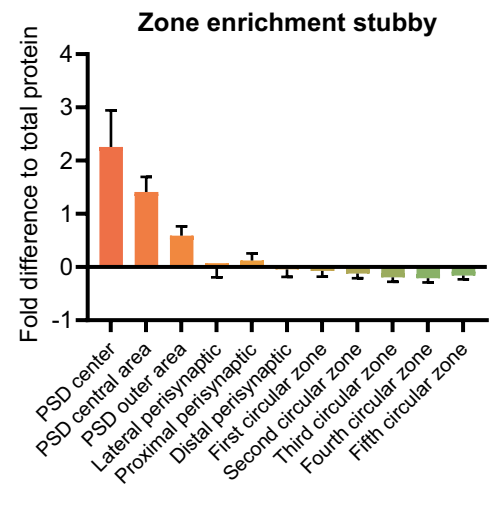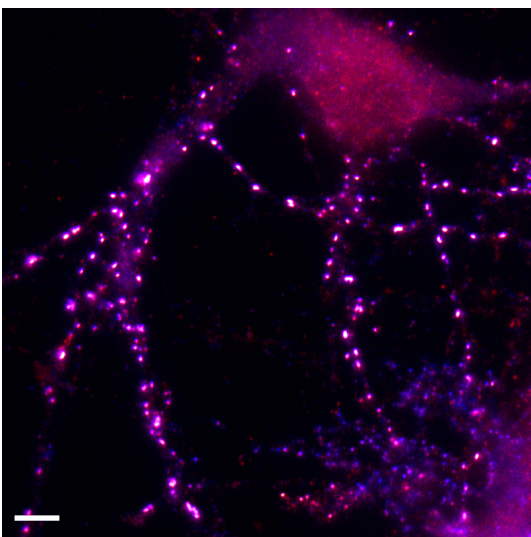

|                        |                   |              |
|------------------------|-------------------|--------------|
| Whole cell copy number | 36366.1 ± 17530.4 |              |
| Spine copy number      | 11.5 ± 5.6        |              |
| Function               | PSD Scaffold      |              |
|                        | Mushroom          | Stubby       |
| Spine copy number      | 9.7 ± 4.8         | 14.6 ± 7.2   |
| % of total protein     | 0.0 ± 0.0%        | 0.0 ± 0.0%   |
| Molarity (µM)          | 0.1 ± 0.1         | 0.1 ± 0.1    |
| PSD copy number        | 5 ± 2.5           | 7 ± 3.4      |
| % in PSD               | 51.5 ± 25.3%      | 48.0 ± 23.6% |

|          | Spine copy number | % of total protein | Molarity ( $\mu\text{M}$ ) | PSD copy number |
|----------|-------------------|--------------------|----------------------------|-----------------|
| Mushroom | $9.7 \pm 4.8$     | $0.0 \pm 0.0\%$    | $0.1 \pm 0.1$              | $5 \pm 2.5$     |
| Stubby   | $14.6 \pm 7.2$    | $0.0 \pm 0.0\%$    | $0.1 \pm 0.1$              | $7 \pm 3.4$     |

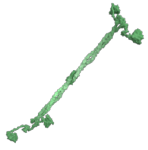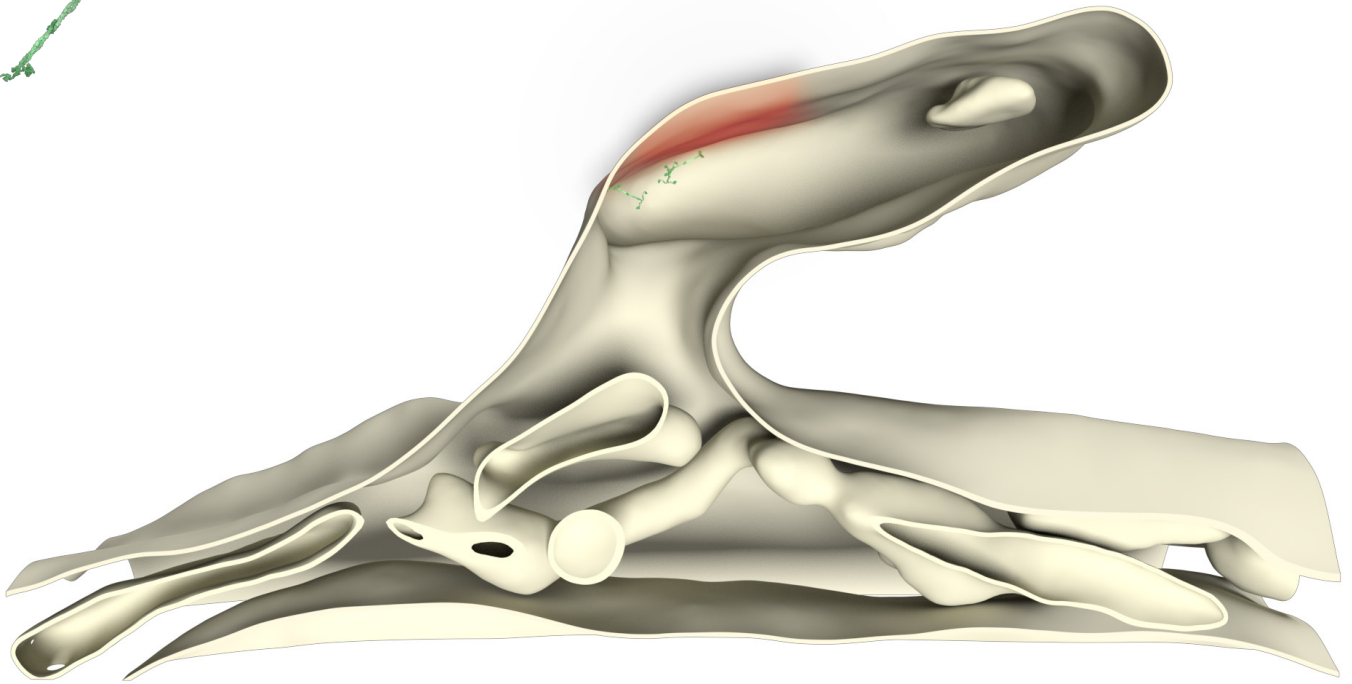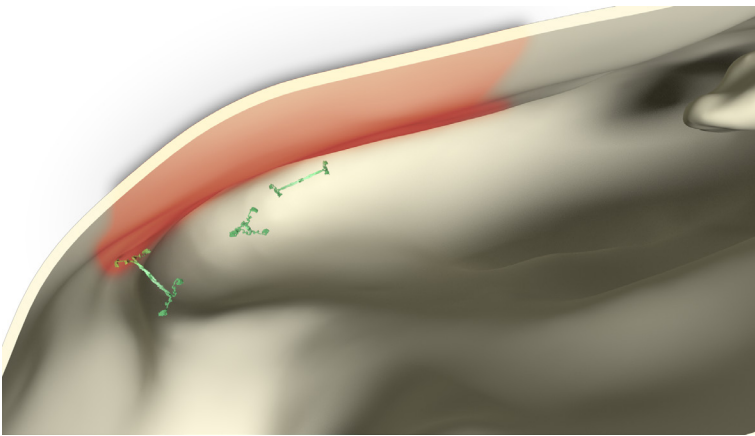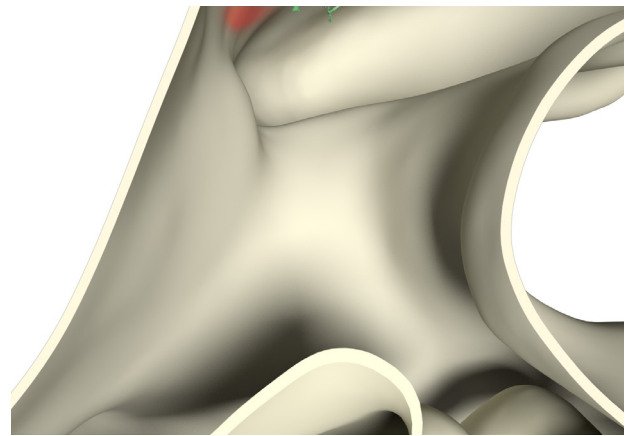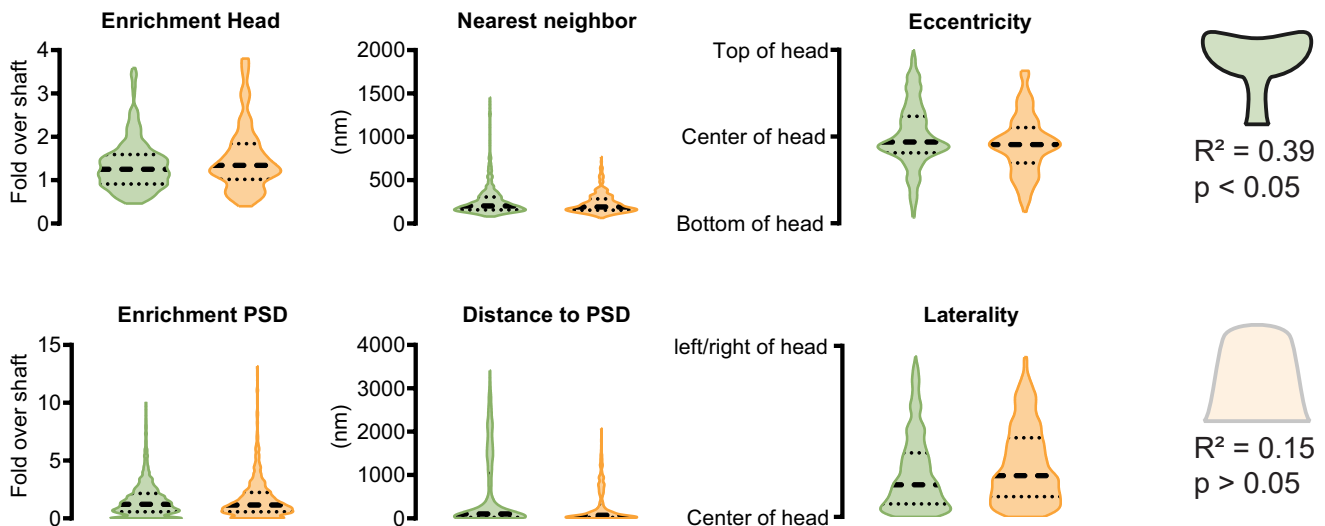

|          | Spine copy number | % of total protein | Molarity ( $\mu\text{M}$ ) | PSD copy number |
|----------|-------------------|--------------------|----------------------------|-----------------|
| Mushroom | $9.7 \pm 4.8$     | $0.0 \pm 0.0\%$    | $0.1 \pm 0.1$              | $5 \pm 2.5$     |
| Stubby   | $14.6 \pm 7.2$    | $0.0 \pm 0.0\%$    | $0.1 \pm 0.1$              | $7 \pm 3.4$     |

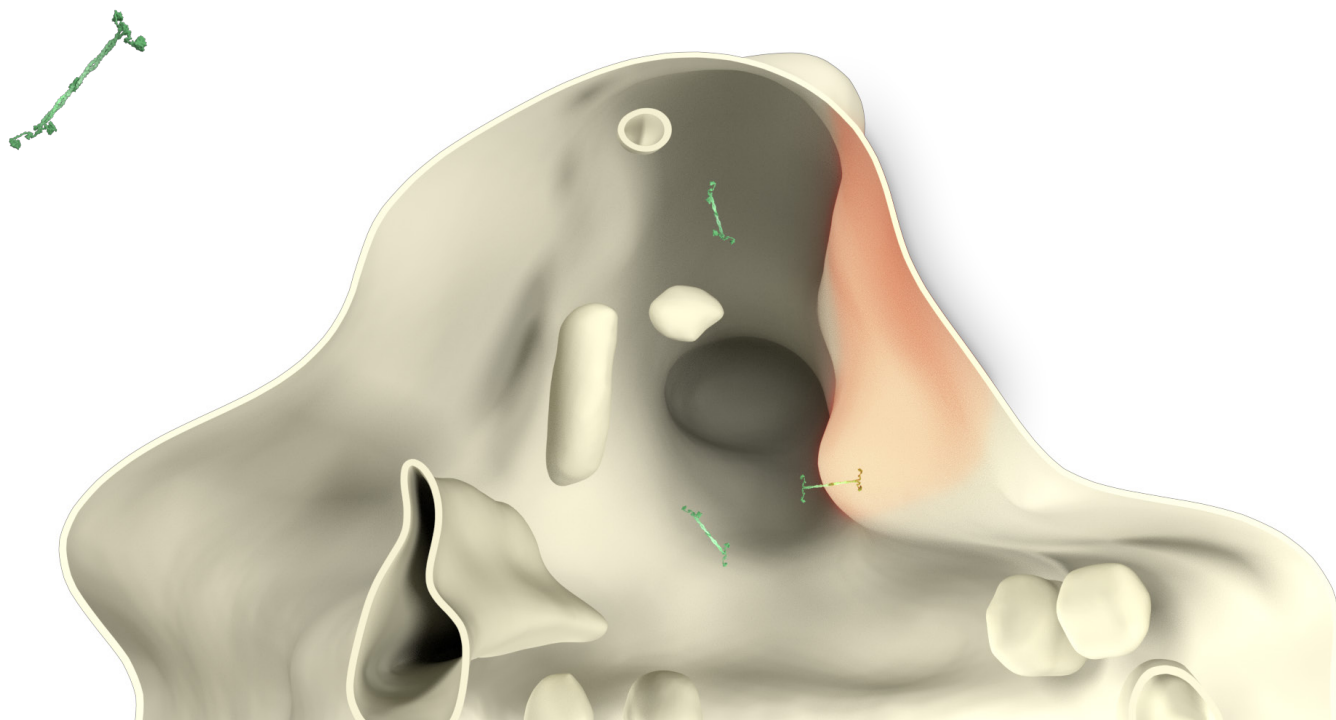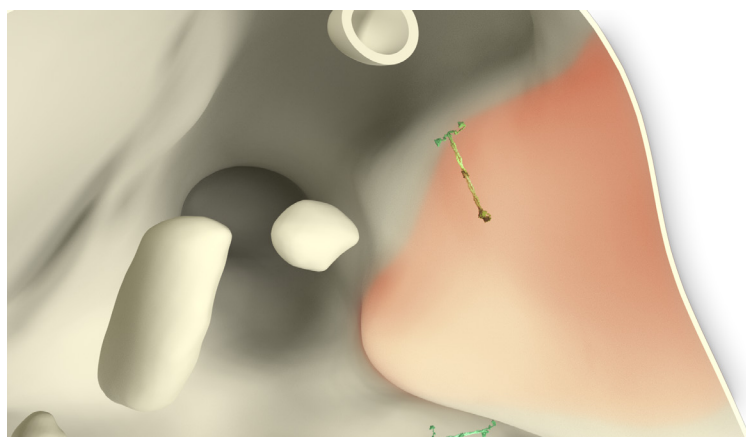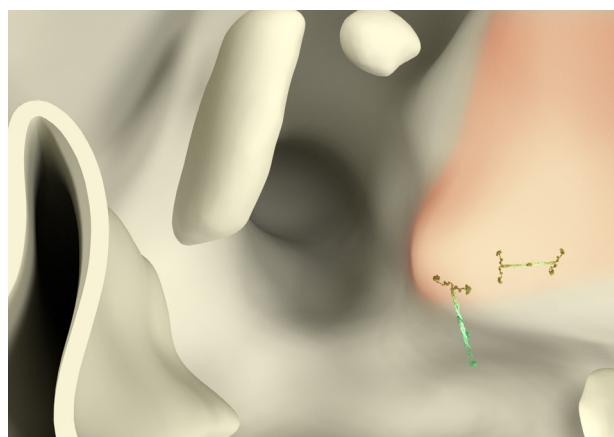

## References

**Antibody:** Synaptic Systems 160 203

### Literature:

Dani et al., 2010, Neuron

Hayashi et al., 2006, J. Neurosci.

Hayashi et al., 2009, Cell

Kato et al., 1998, J. Biol. Chem.

Lu et al., 2007, Neuron

MacGillavry et al., 2013, Neuron

Newpher and Ehlers, 2008, Neuron

Roche et al., 1999, J. Biol. Chem.

**PDB Identifier:** 3cve (modified)

Tao-Cheng et al., 2014, Neuroscience

Tu et al., 1998, Neuron

Xiao et al., 1998, Neuron



**Homer3 (Vesl3, Gene: Homer3, Uniprot ID: Q9Z2X5)**

**Known function:** Scaffold protein, Links mGluR to downstream targets

**Known organization:** Cytosolic, Directly below PSD, Selfmultimerizes (Dimer of dimers), Forms mesh like structure with Shank proteins

**Known Interactions:** mGluR, IP3R, RyR, Shank proteins, Dynamin 3

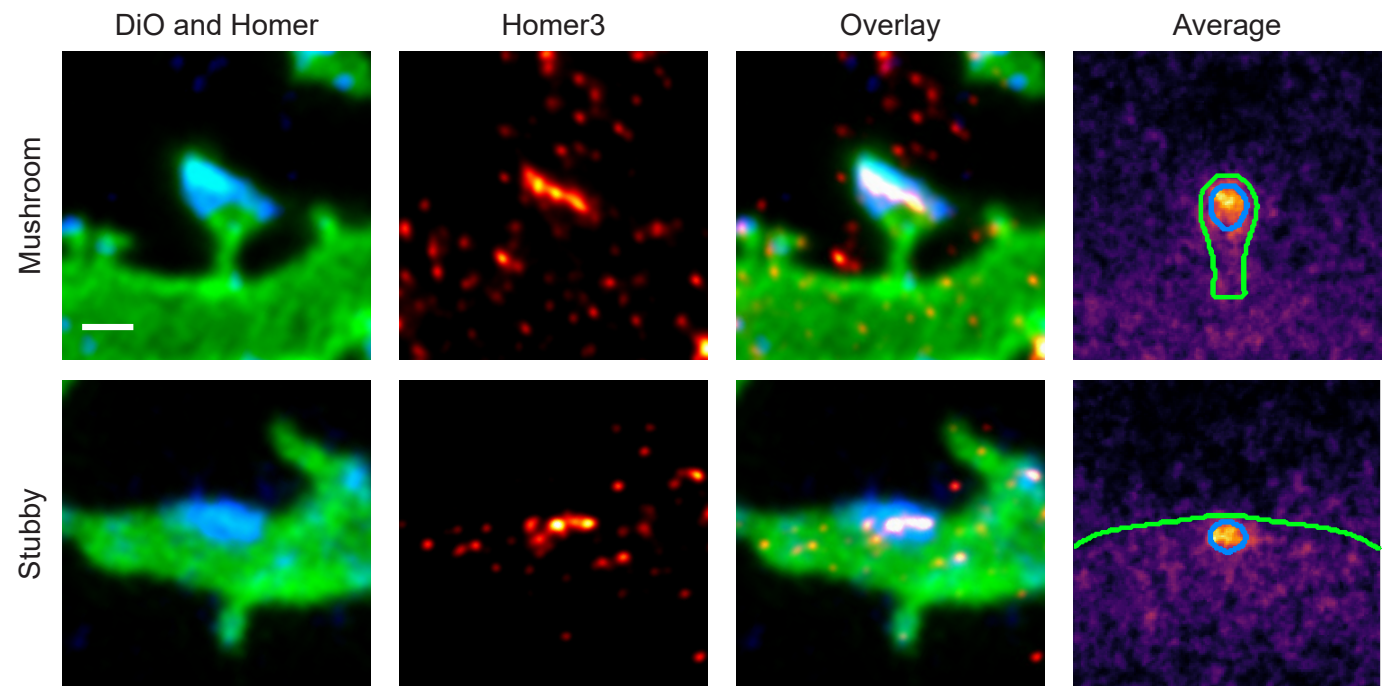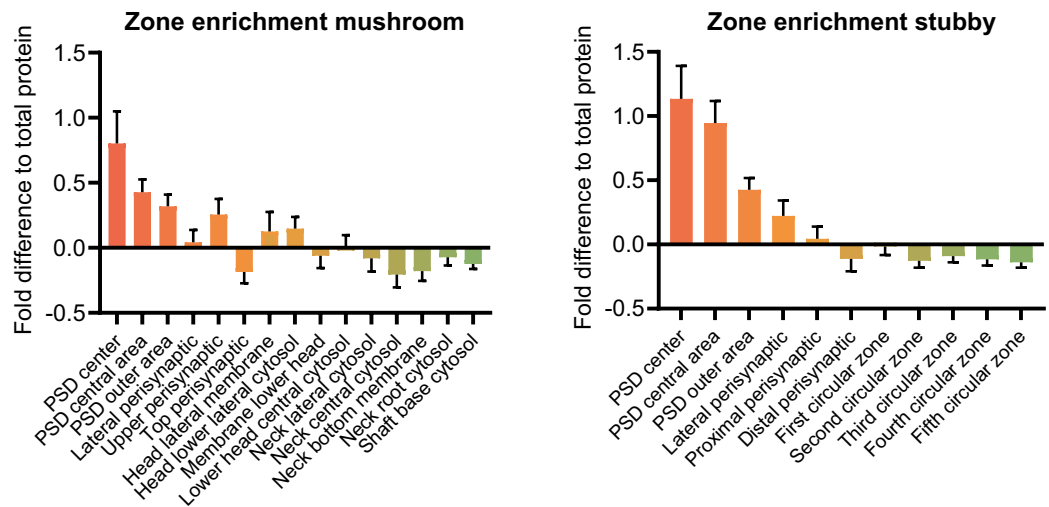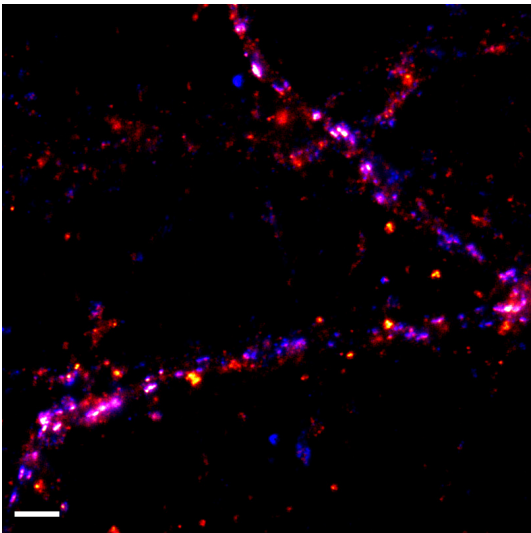

|                        |                    |              |
|------------------------|--------------------|--------------|
| Whole cell copy number | 265383.1 ± 60615.3 |              |
| Spine copy number      | 169.7 ± 41.2       |              |
| Function               | PSD Scaffold       |              |
|                        | Mushroom           | Stubby       |
| Spine copy number      | 160.5 ± 39.0       | 199.4 ± 48.4 |
| % of total protein     | 0.0 ± 0.0%         | 0.0 ± 0.0%   |
| Molarity (μM)          | 2.0 ± 0.5          | 1.9 ± 0.5    |
| PSD copy number        | 76 ± 18.4          | 92 ± 22.3    |
| % in PSD               | 47.3 ± 11.5%       | 46.1 ± 11.2% |

|          | Spine copy number | % of total protein | Molarity ( $\mu\text{M}$ ) | PSD copy number |
|----------|-------------------|--------------------|----------------------------|-----------------|
| Mushroom | $160.5 \pm 39.0$  | $0.0 \pm 0.0\%$    | $2.0 \pm 0.5$              | $76 \pm 18.4$   |
| Stubby   | $199.4 \pm 48.4$  | $0.0 \pm 0.0\%$    | $1.9 \pm 0.5$              | $92 \pm 22.3$   |

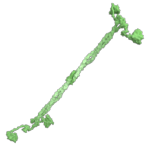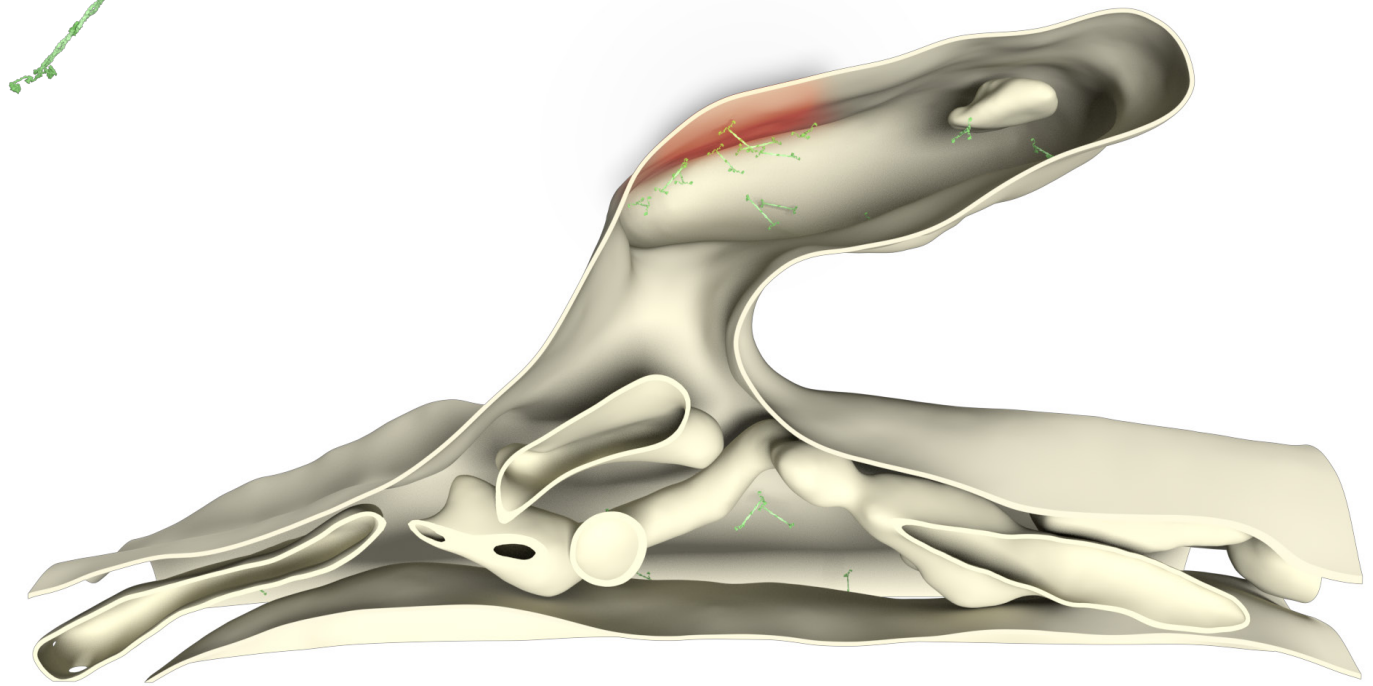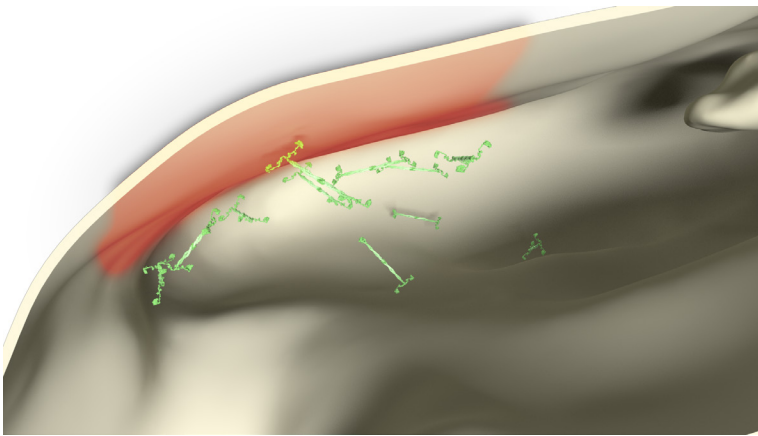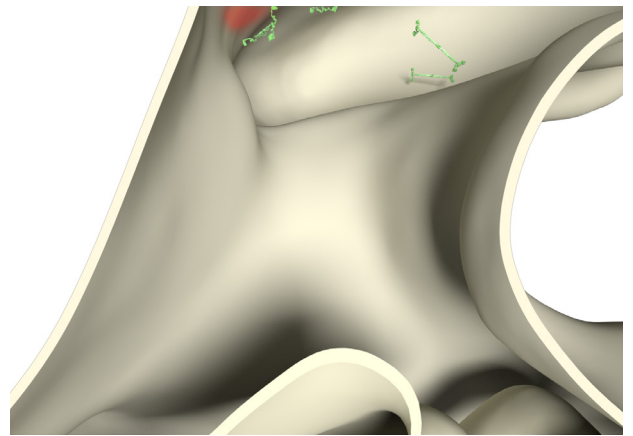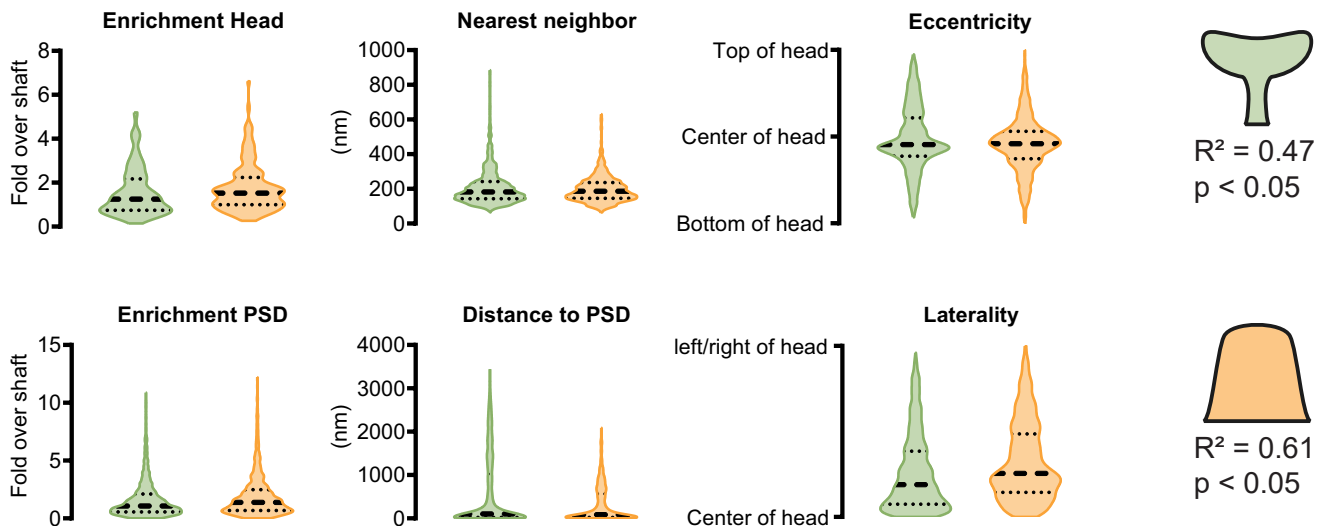

|          | Spine copy number | % of total protein | Molarity ( $\mu\text{M}$ ) | PSD copy number |
|----------|-------------------|--------------------|----------------------------|-----------------|
| Mushroom | $160.5 \pm 39.0$  | $0.0 \pm 0.0\%$    | $2.0 \pm 0.5$              | $76 \pm 18.4$   |
| Stubby   | $199.4 \pm 48.4$  | $0.0 \pm 0.0\%$    | $1.9 \pm 0.5$              | $92 \pm 22.3$   |

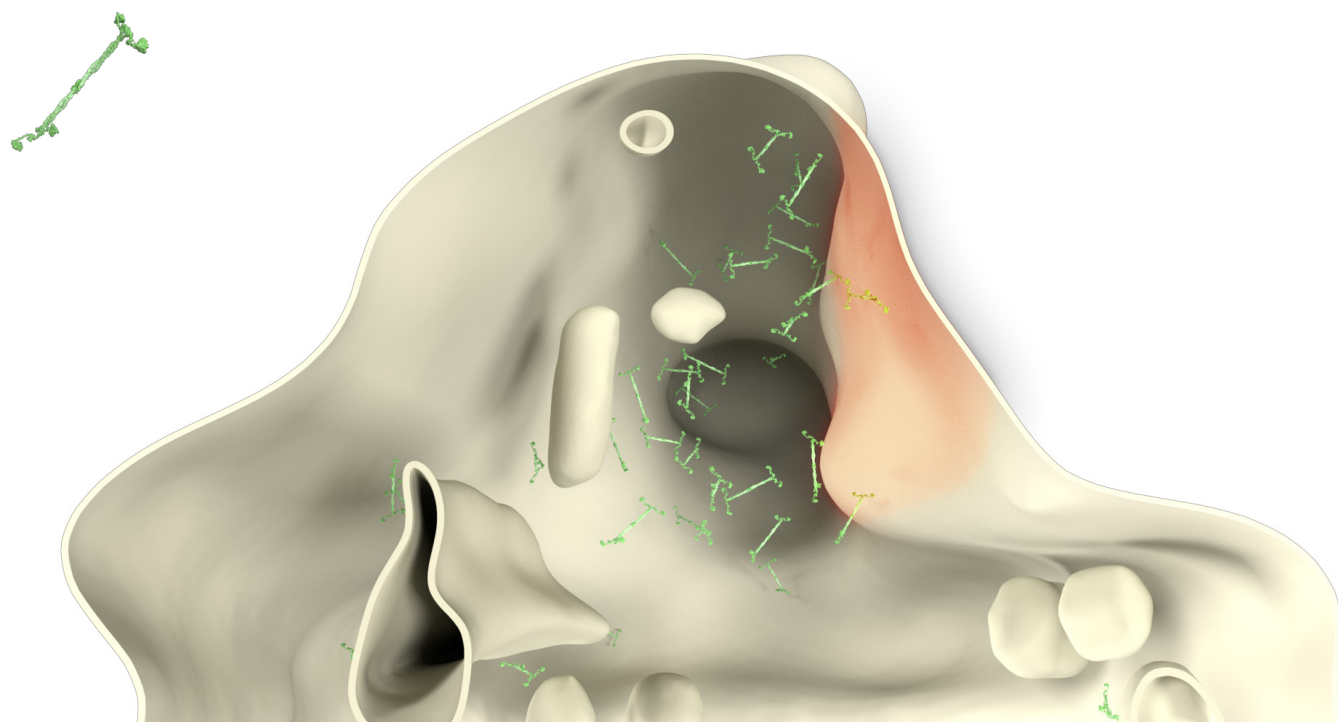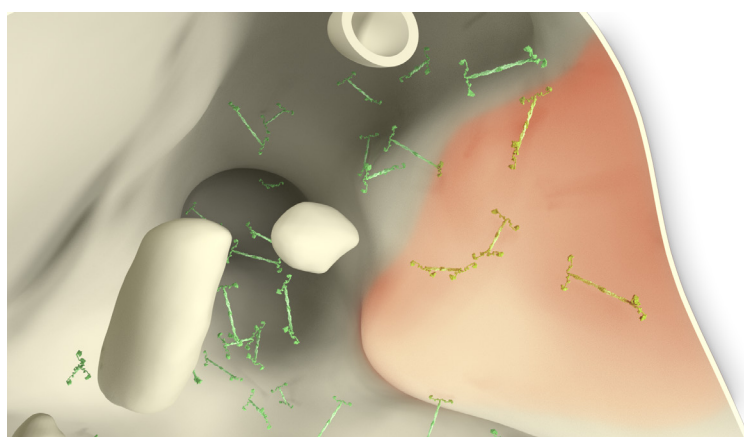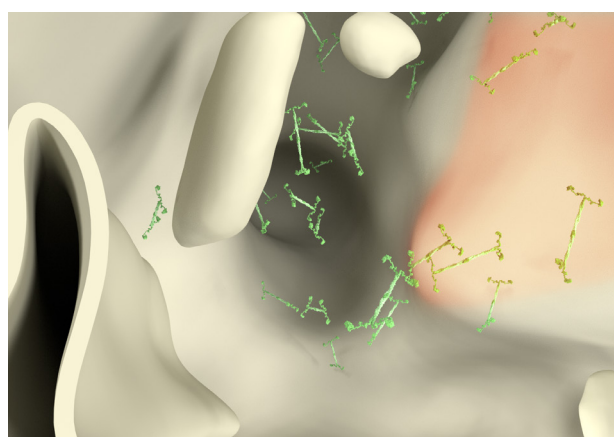

## References

**Antibody:** Synaptic Systems 160 303

**PDB Identifier:** 3cvf

### Literature:

Dani et al., 2010, Neuron

Hayashi et al., 2006, J. Neurosci.

Hayashi et al., 2009, Cell

Kato et al., 1998, J. Biol. Chem.

Lu et al., 2007, Neuron

MacGillavry et al., 2013, Neuron

Newpher and Ehlers, 2008, Neuron

Roche et al., 1999, J. Biol. Chem.

Tao-Cheng et al., 2014, Neuroscience

Tu et al., 1998, Neuron

Xiao et al., 1998, Neuron



**HSC70 (Gene: Hspa8, Uniprot ID: P63018)**

**Known function:** Clathrin uncoating, ERAD associated chaperone

**Known organization:** Cytosolic

**Known Interactions:** Clathrin (via auxilin)

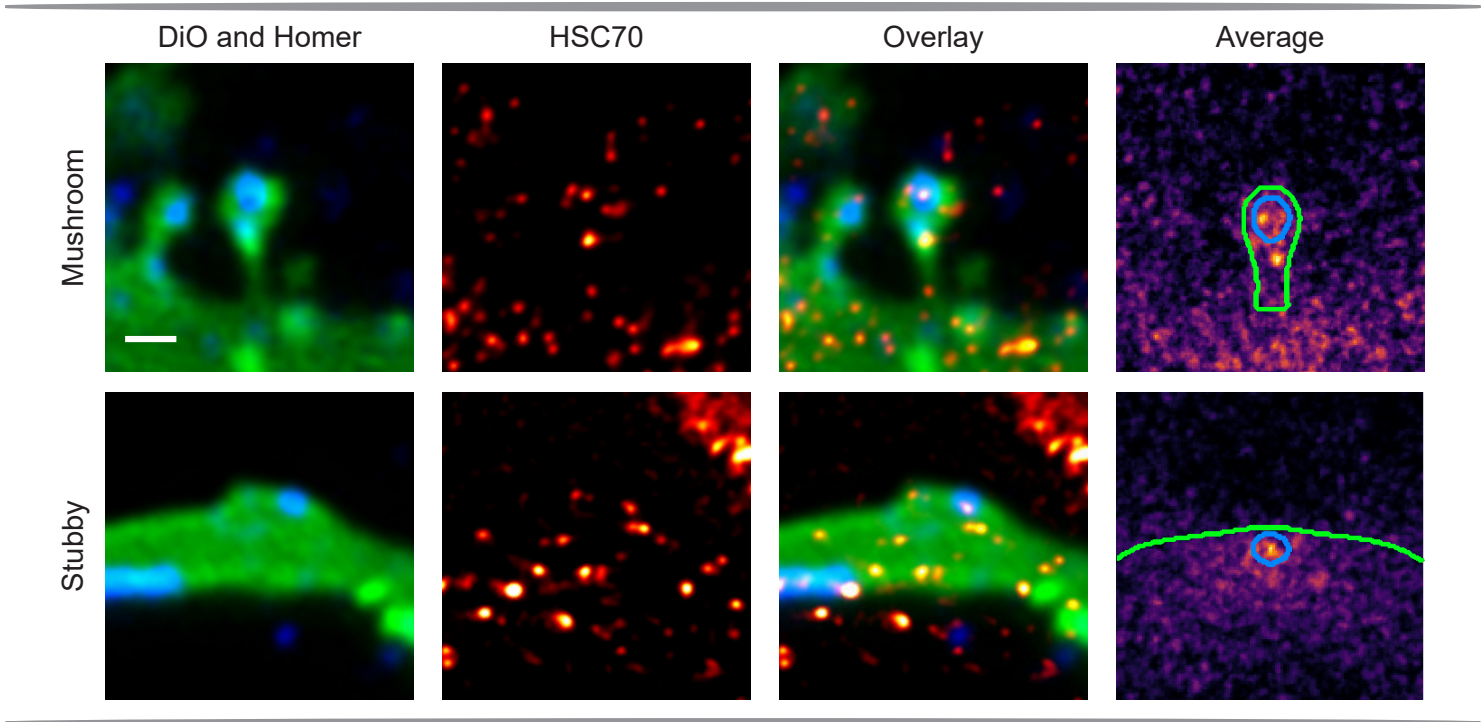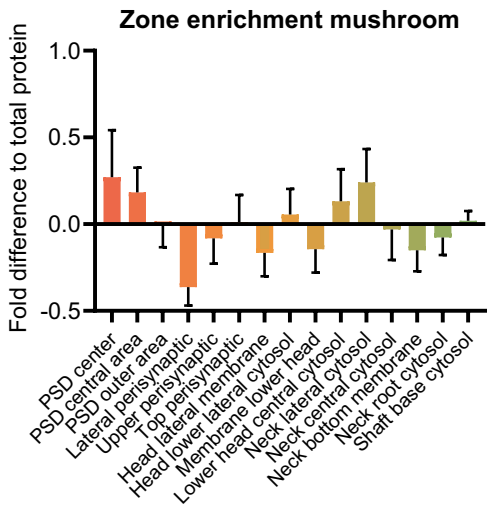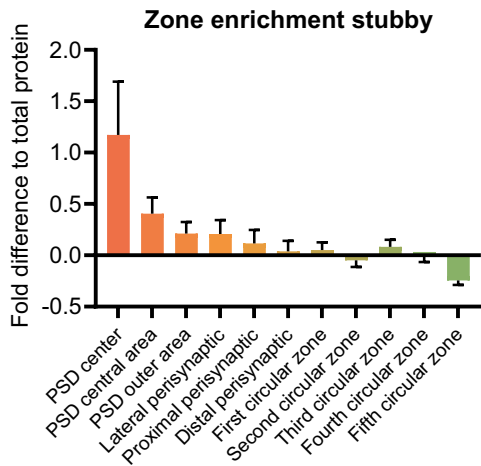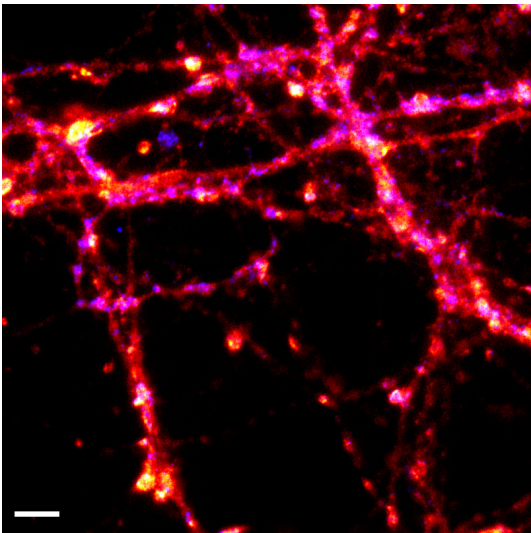

|                        |                            |              |
|------------------------|----------------------------|--------------|
| Whole cell copy number | 551216.8 ± 107438.0        |              |
| Spine copy number      | 199.2 ± 44.9               |              |
| Function               | Exo-/Endocytosis cofactors |              |
|                        | Mushroom                   | Stubby       |
| Spine copy number      | 137.3 ± 30.9               | 276.0 ± 62.1 |
| % of total protein     | 0.0 ± 0.0%                 | 0.1 ± 0.0%   |
| Molarity (µM)          | 1.7 ± 0.4                  | 2.6 ± 0.6    |
| PSD copy number        | 24 ± 5.4                   | 71 ± 16.0    |
| % in PSD               | 17.5 ± 3.9%                | 25.7 ± 5.8%  |

|          | Spine copy number | % of total protein | Molarity ( $\mu\text{M}$ ) | PSD copy number |
|----------|-------------------|--------------------|----------------------------|-----------------|
| Mushroom | $137.3 \pm 30.9$  | $0.0 \pm 0.0\%$    | $1.7 \pm 0.4$              | $24 \pm 5.4$    |
| Stubby   | $276.0 \pm 62.1$  | $0.1 \pm 0.0\%$    | $2.6 \pm 0.6$              | $71 \pm 16.0$   |

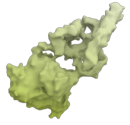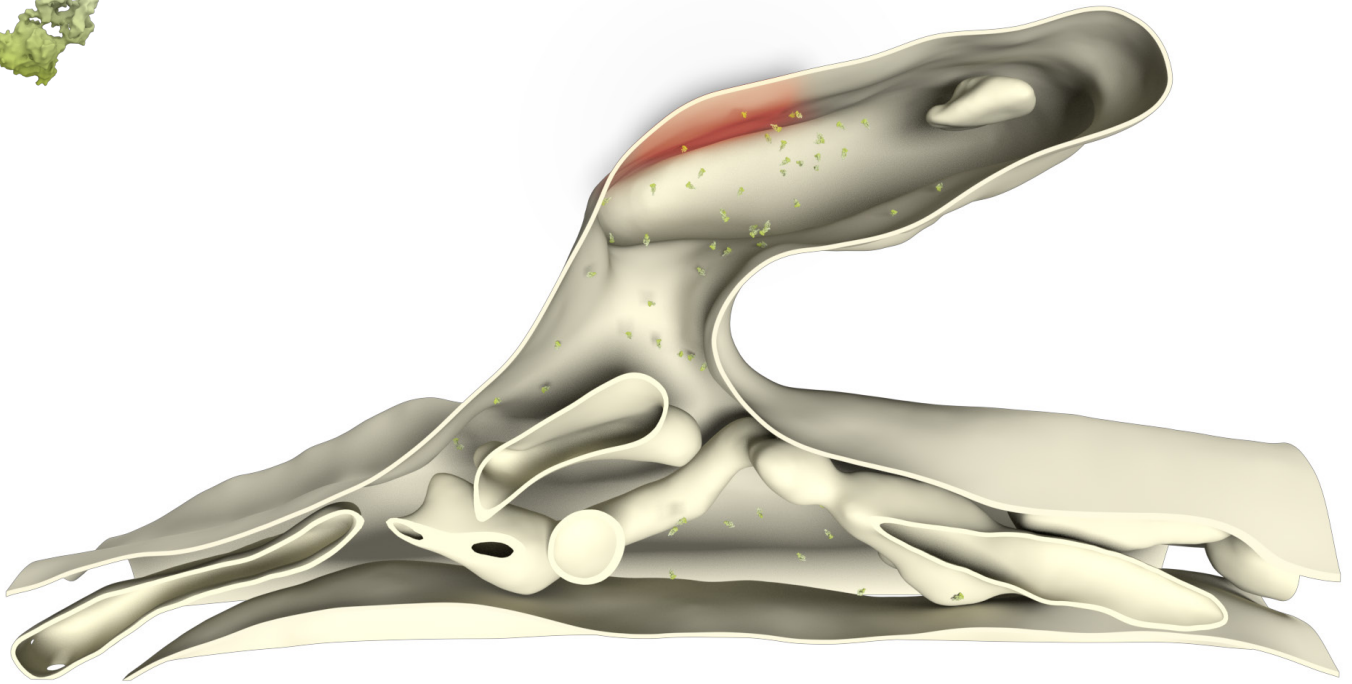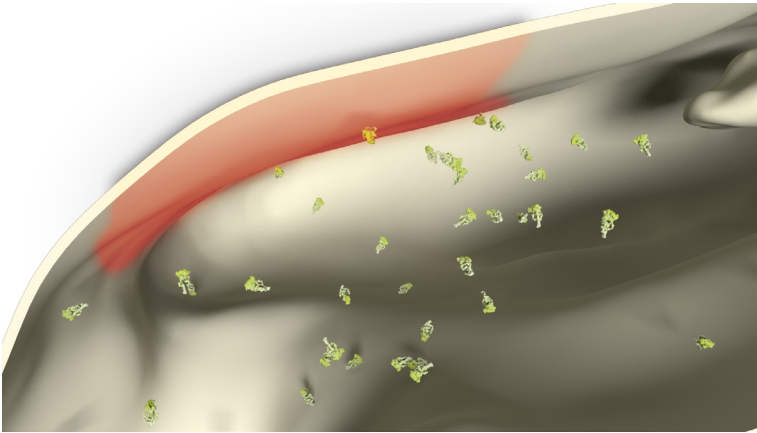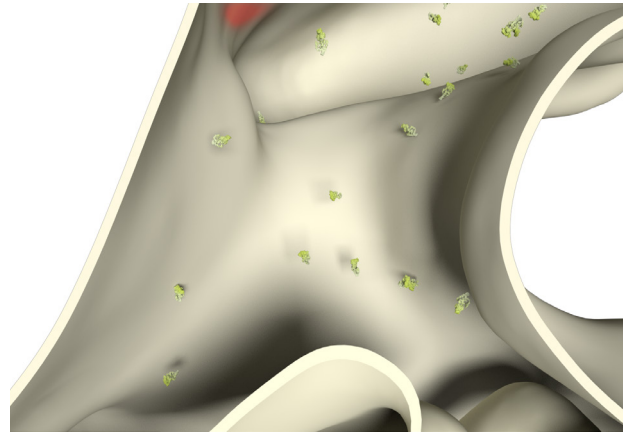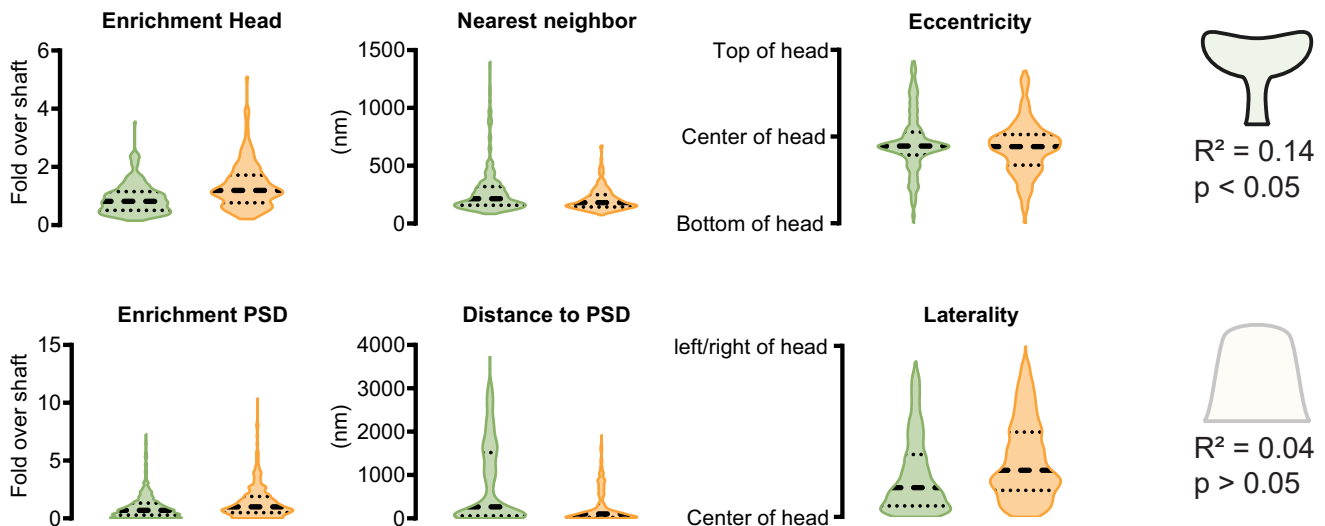

|          | Spine copy number | % of total protein | Molarity ( $\mu\text{M}$ ) | PSD copy number |
|----------|-------------------|--------------------|----------------------------|-----------------|
| Mushroom | $137.3 \pm 30.9$  | $0.0 \pm 0.0\%$    | $1.7 \pm 0.4$              | $24 \pm 5.4$    |
| Stubby   | $276.0 \pm 62.1$  | $0.1 \pm 0.0\%$    | $2.6 \pm 0.6$              | $71 \pm 16.0$   |

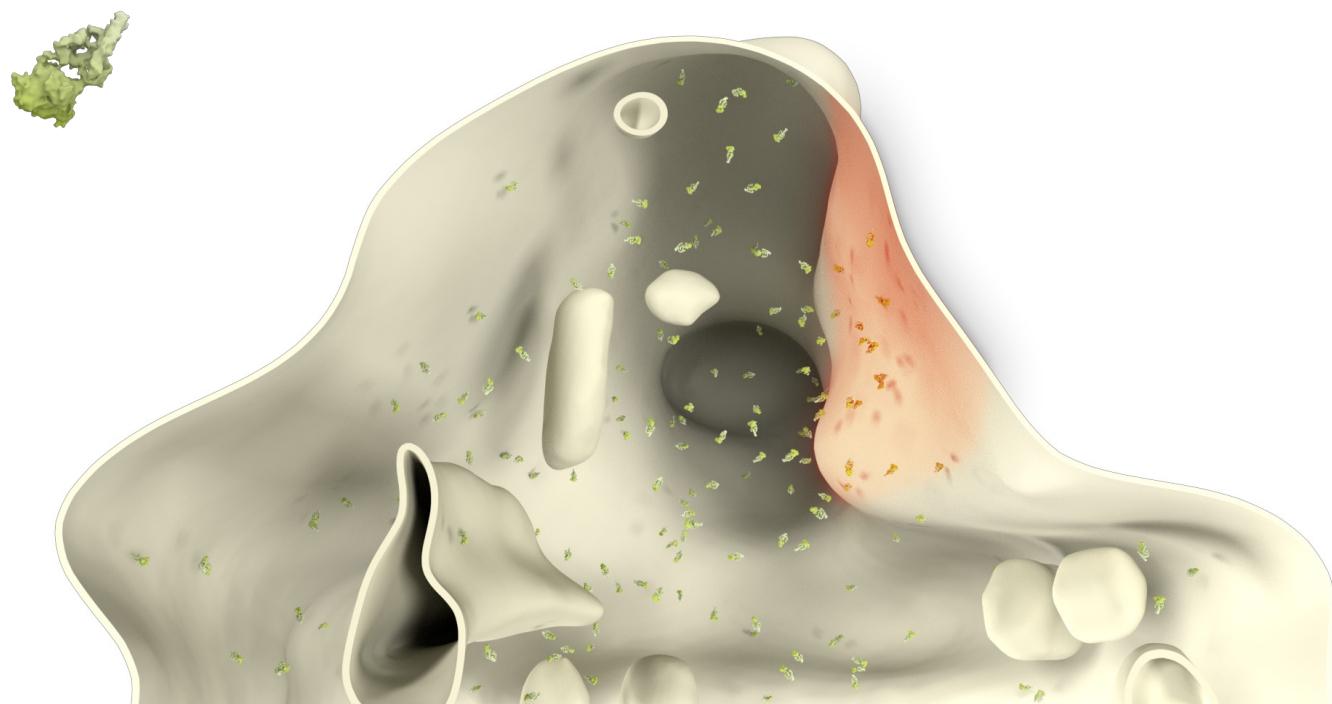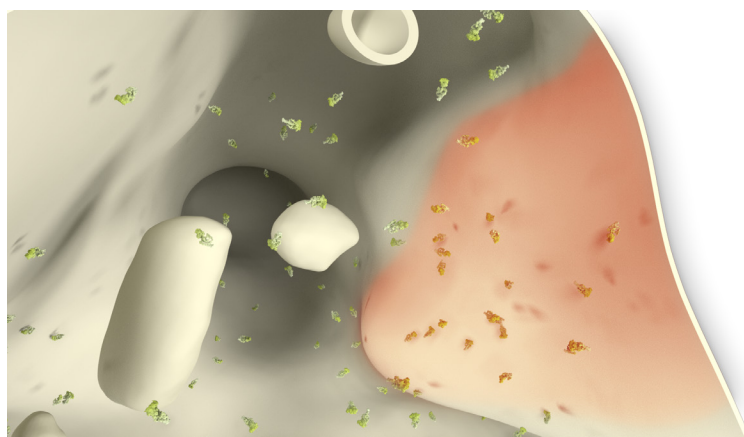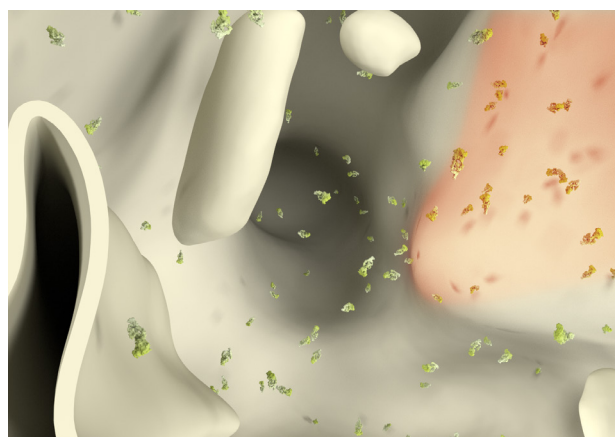

## References

**Antibody:** Santa Cruz sc-7298

**PDB Identifier:** 4h5t, 1hx1, 3ldq, 1udo

### Literature:

Eisenberg and Greene, 2007, Traffic

Grove et al., 2011, Mol. Biol. Cell.

Huang et al., 1993, J Biol Chem.

Rothnie et al., 2011, Proc. Natl. Acad. Sci. U S A

Schlossman et al., 1984, J. Cell. Biol.

Ungewickell et al., 1997, J. Biol. Chem.

Yamamoto et al., 2010, Cell Struct. Funct.



## IGF1R (CD221, Gene: Igf1r, Uniprot ID: P24062)

**Known function:** Required for development, growth and survival, Influences lifespan, Potentiates excitatory synaptic transmission, Regulates mitochondria

**Known organization:** Transmembrane proteine, Homodimers

**Known Interactions:** None

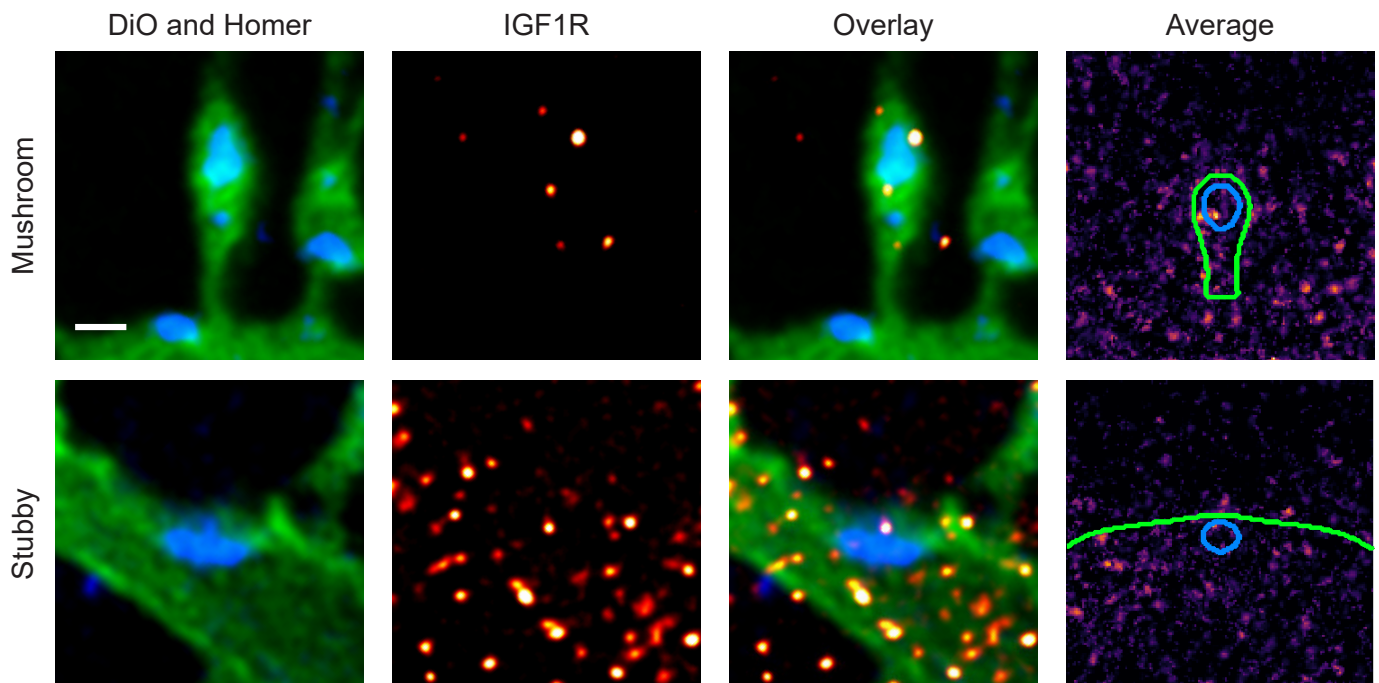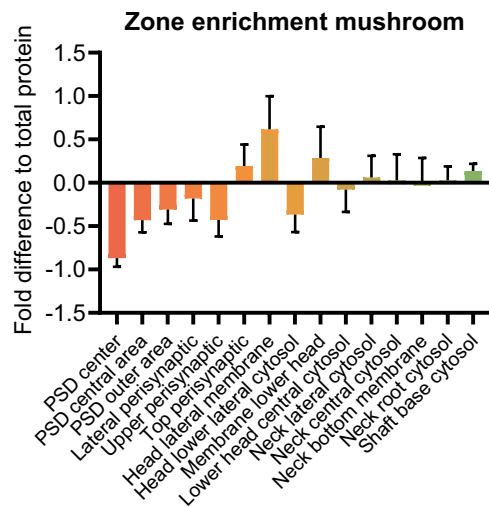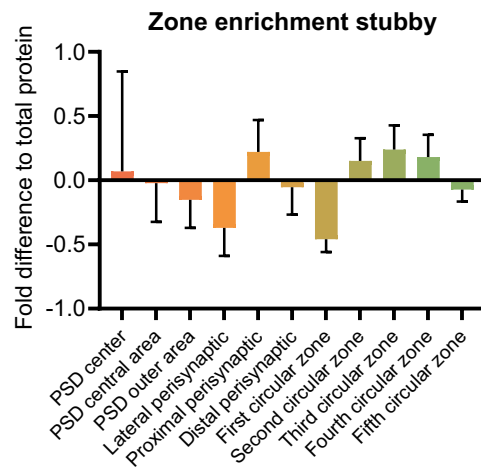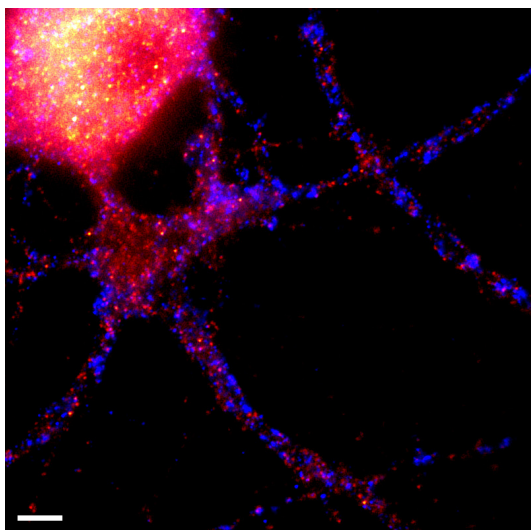

|                            |                         |        |
|----------------------------|-------------------------|--------|
| Whole cell copy number     | not detected            |        |
| Spine copy number          | 350.2 (from literature) |        |
| Function                   | Receptor                |        |
|                            | Mushroom                | Stubby |
| Spine copy number          | 296.2                   | 400.8  |
| % of total protein         | 0.2%                    | 0.3%   |
| Molarity ( $\mu\text{M}$ ) | 3.8                     | 3.8    |
| PSD copy number            | 44                      | 43     |
| % in PSD                   | 14.9%                   | 10.7%  |

|          | Spine copy number | % of total protein | Molarity ( $\mu\text{M}$ ) | PSD copy number |
|----------|-------------------|--------------------|----------------------------|-----------------|
| Mushroom | 296.2             | 0.2%               | 3.8                        | 44              |
| Stubby   | 400.8             | 0.3%               | 3.8                        | 43              |

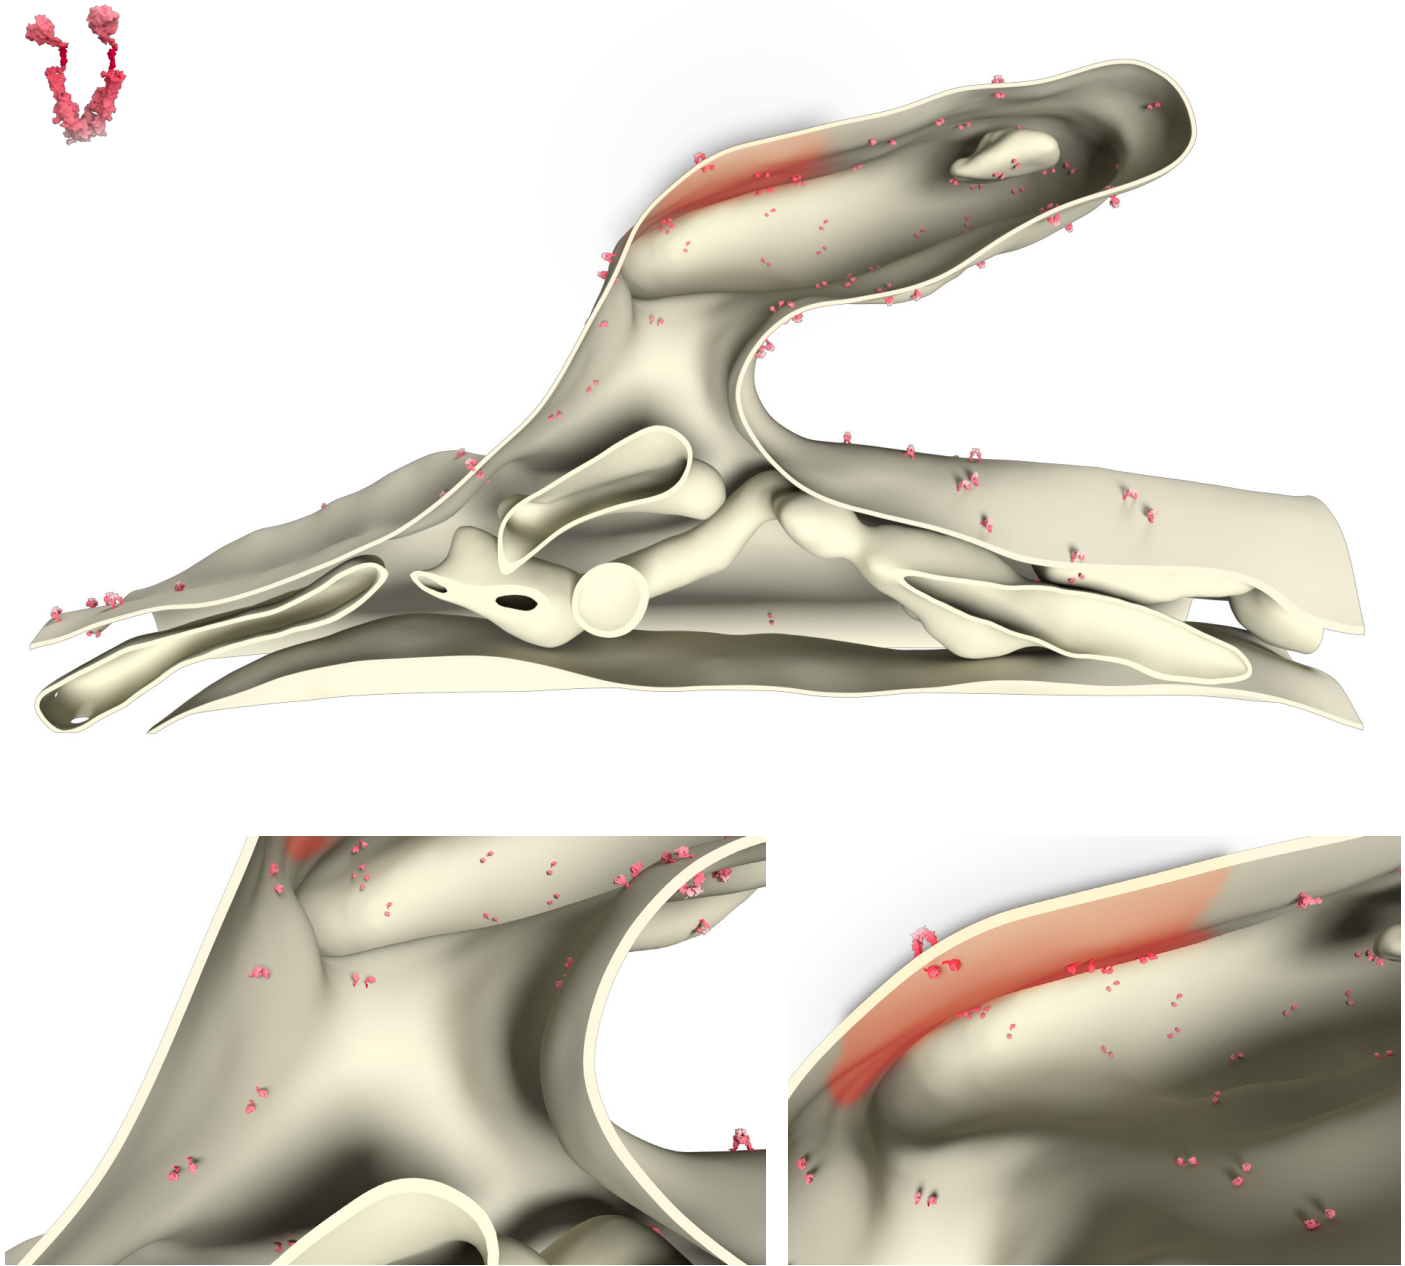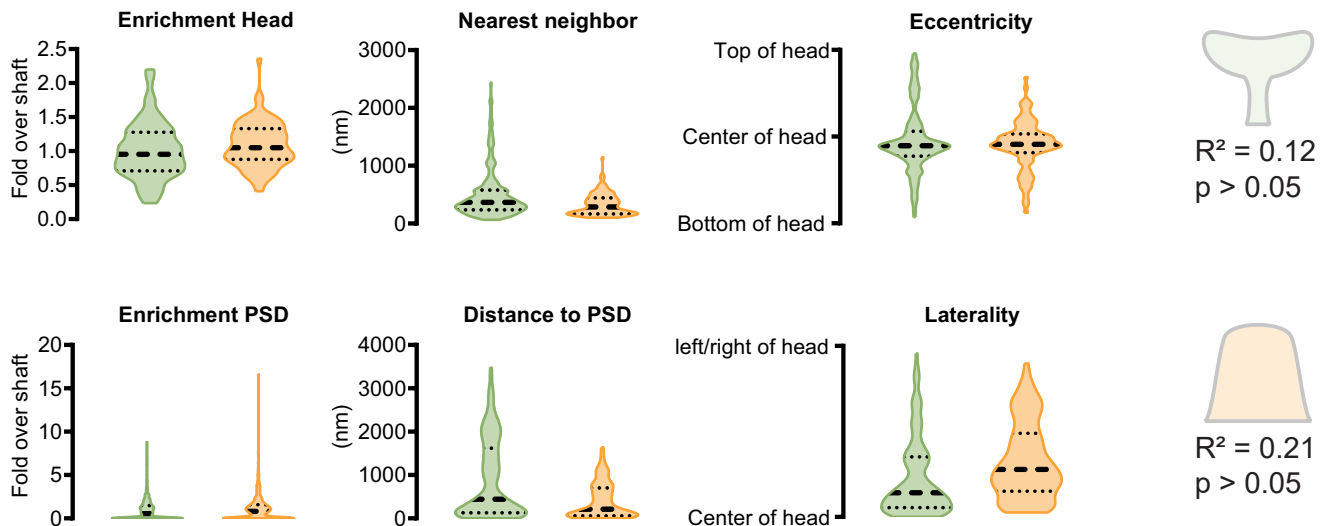

|          | Spine copy number | % of total protein | Molarity ( $\mu\text{M}$ ) | PSD copy number |
|----------|-------------------|--------------------|----------------------------|-----------------|
| Mushroom | 296.2             | 0.2%               | 3.8                        | 44              |
| Stubby   | 400.8             | 0.3%               | 3.8                        | 43              |

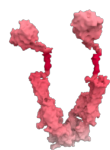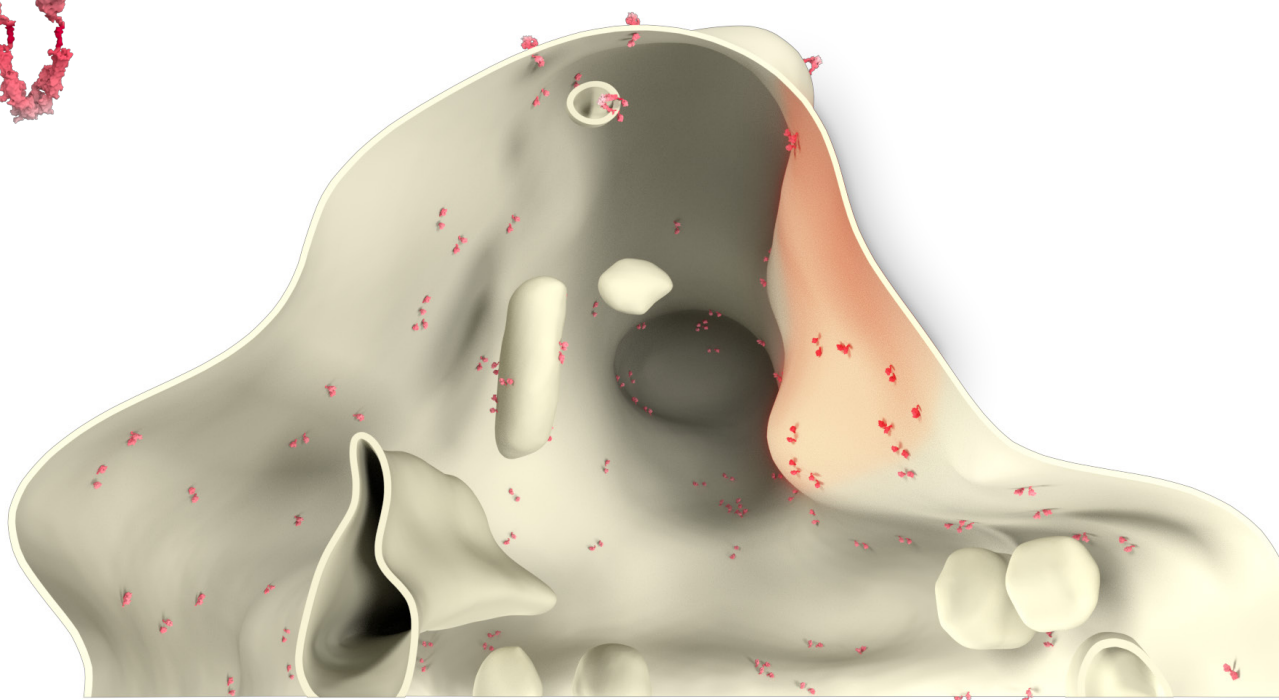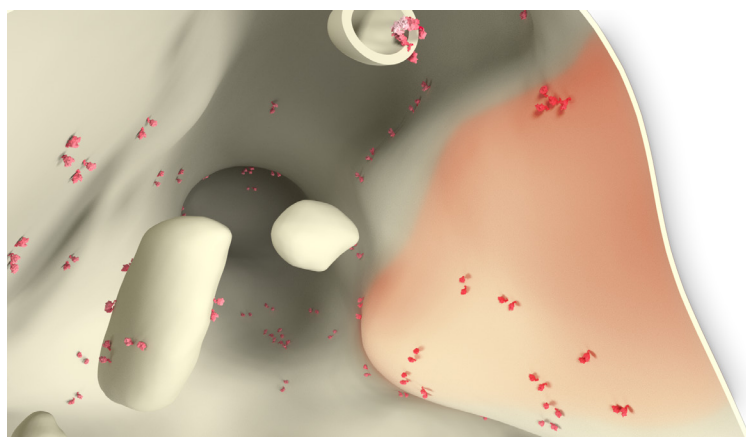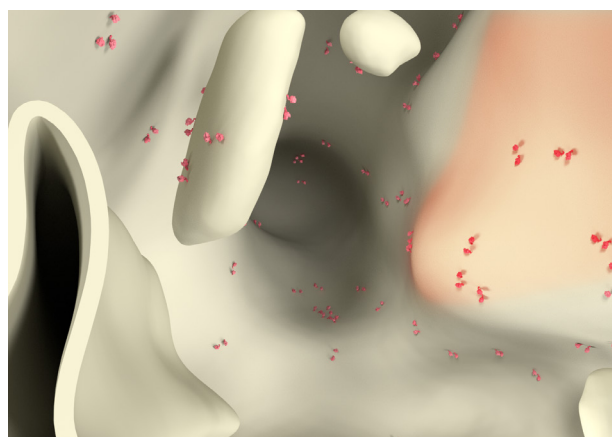

## References

**Antibody:** Cell Signaling 3027

**PDB Identifier:** 4zxb

### Literature:

D'Ercole et al., 1996, Mol. Neurobiol.

Gazit et al., 2016, Neuron

Kenyon, 2010, Ann. N Y Acad. Sci.

Lemmon and Schlessinger, 2010, Cell

Ramsey et al., 2005, J. Neurophysiol.

Suh et al., 2008, Proc. Natl. Acad. Sci. U S A



Kir2.1 (IRK-1, Gene: Kcnj2, Uniprot ID: Q64273)

**Known function:** Inwardly rectifying potassium channel

**Known organization:** Transmembrane protein, Present in PSD95 supercomplexes

**Known Interactions:** PSD95

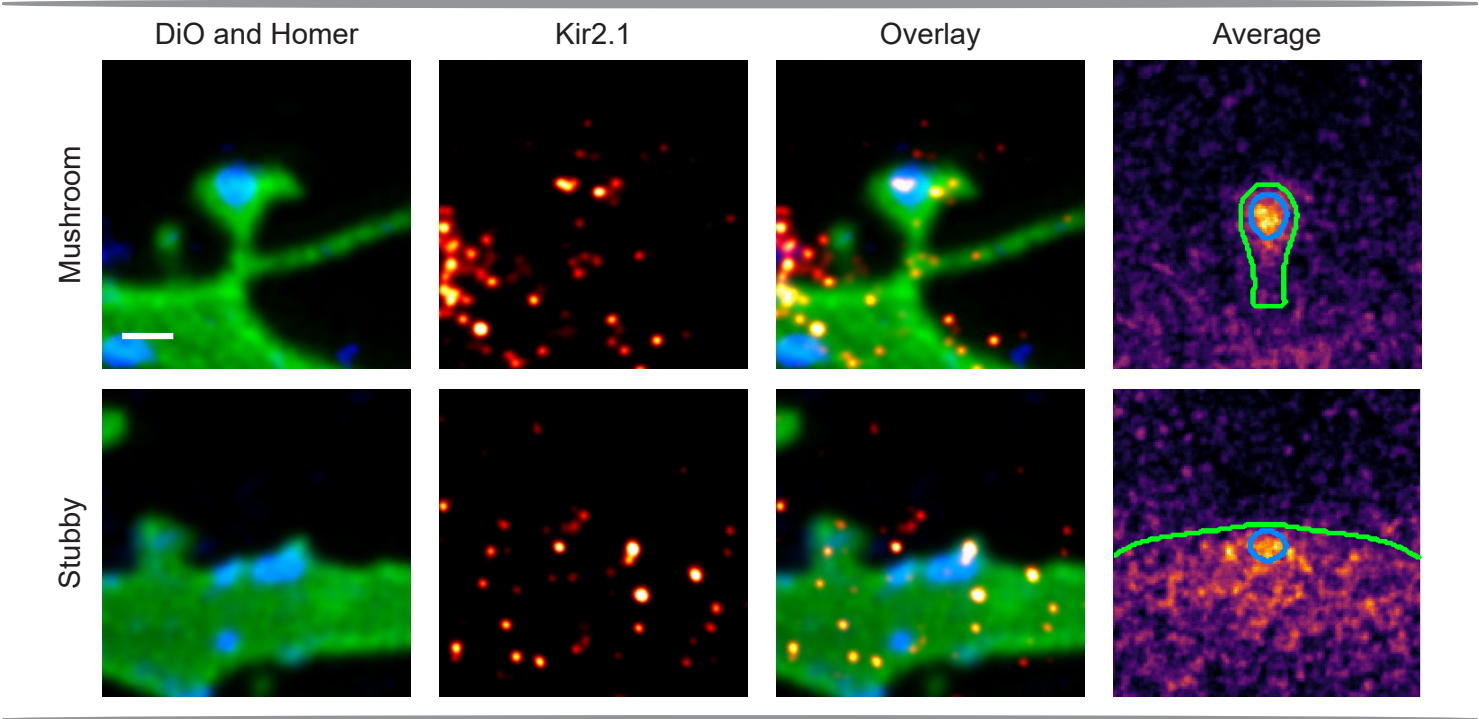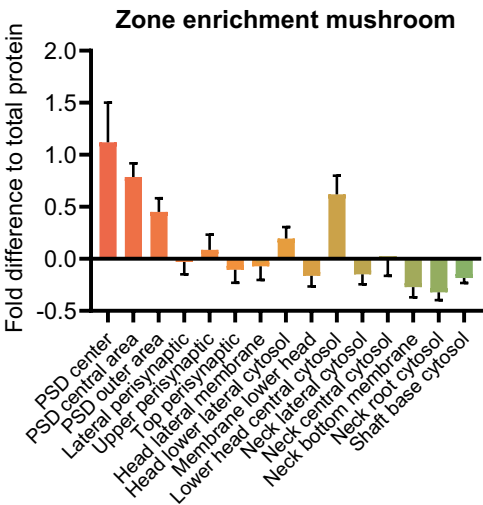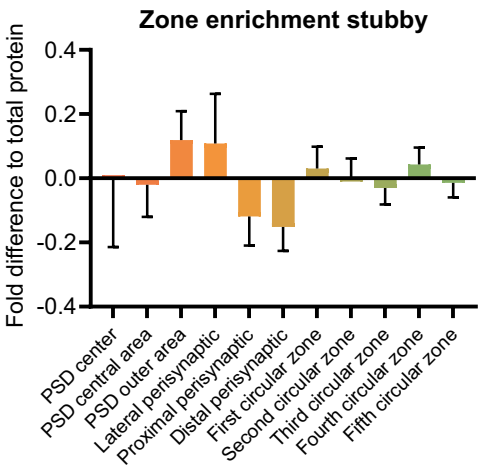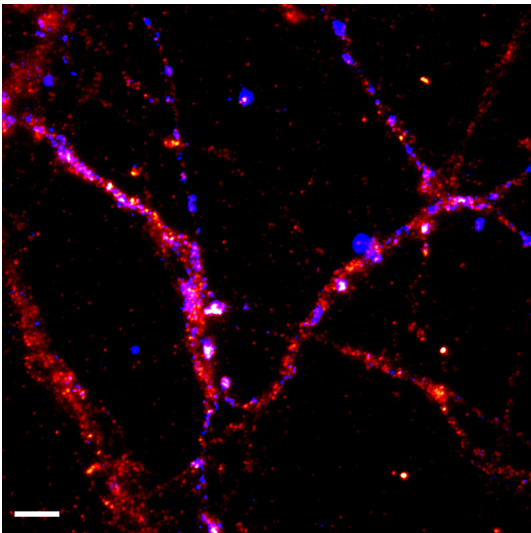

|                        |              |              |
|------------------------|--------------|--------------|
| Whole cell copy number | not detected |              |
| Spine copy number      | not detected |              |
| Function               | Ion channel  |              |
|                        | Mushroom     | Stubby       |
| Spine copy number      | not detected | not detected |
| % of total protein     | not detected | not detected |
| Molarity (μM)          | not detected | not detected |
| PSD copy number        | not detected | not detected |
| % in PSD               | not detected | not detected |

|          | Spine copy number | % of total protein | Molarity ( $\mu\text{M}$ ) | PSD copy number |
|----------|-------------------|--------------------|----------------------------|-----------------|
| Mushroom | not detected      | not detected       | not detected               | not detected    |
| Stubby   | not detected      | not detected       | not detected               | not detected    |

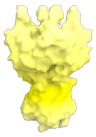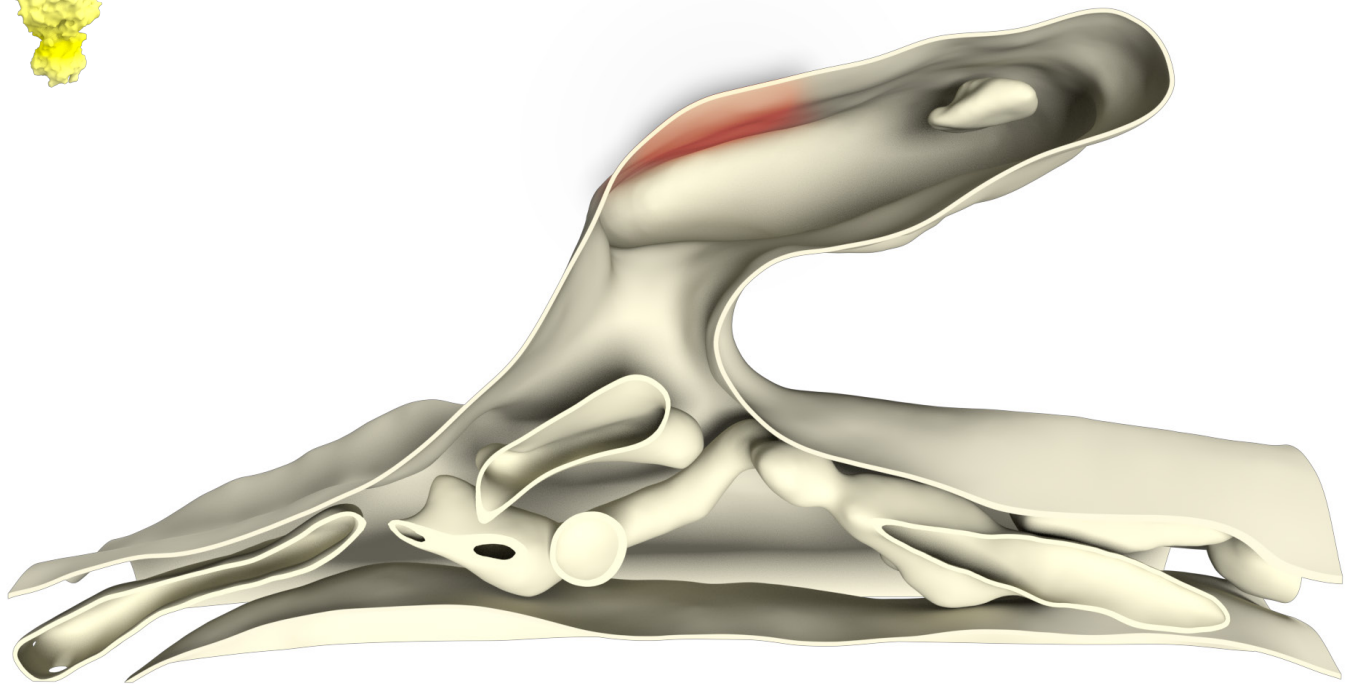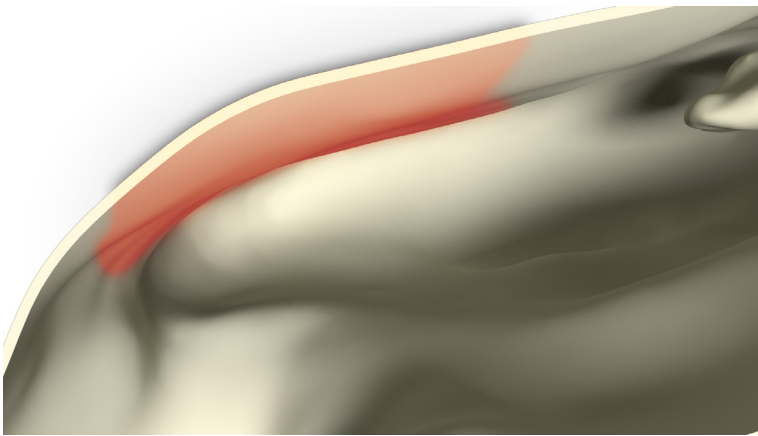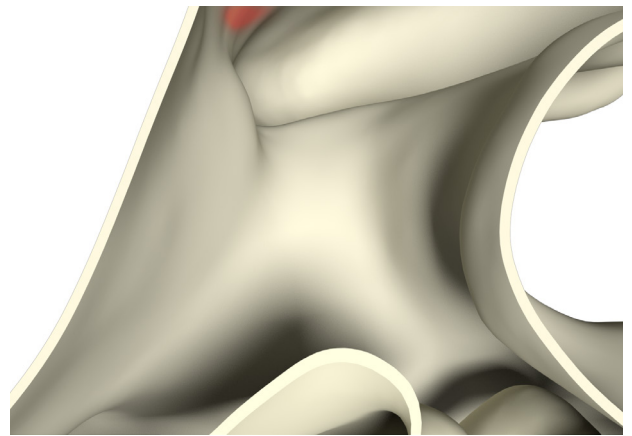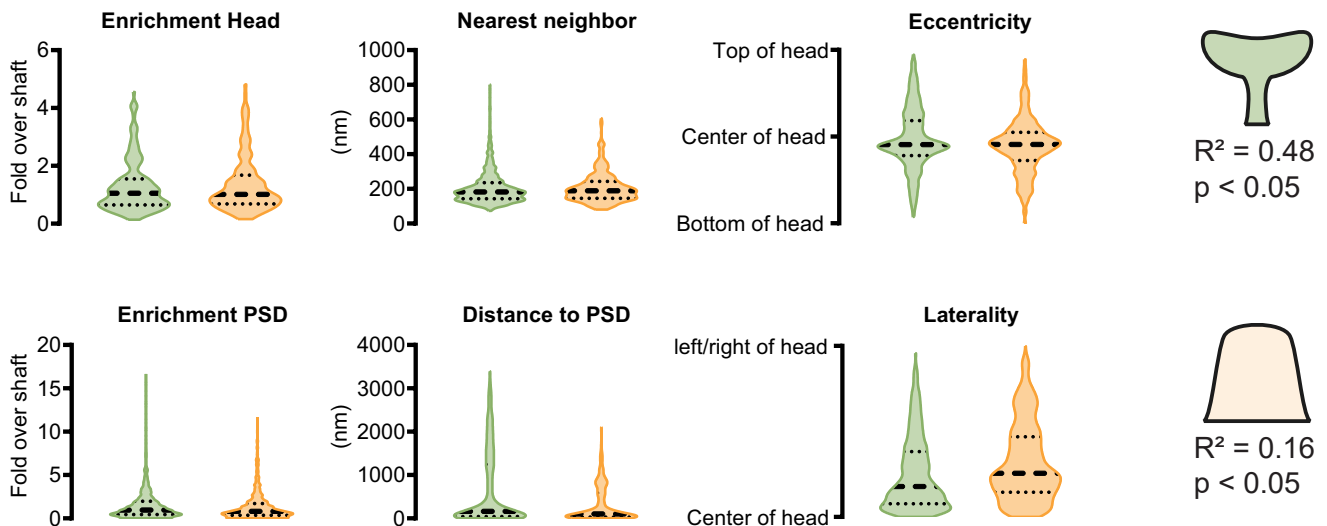

|          | Spine copy number | % of total protein | Molarity ( $\mu\text{M}$ ) | PSD copy number |
|----------|-------------------|--------------------|----------------------------|-----------------|
| Mushroom | not detected      | not detected       | not detected               | not detected    |
| Stubby   | not detected      | not detected       | not detected               | not detected    |

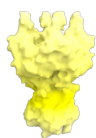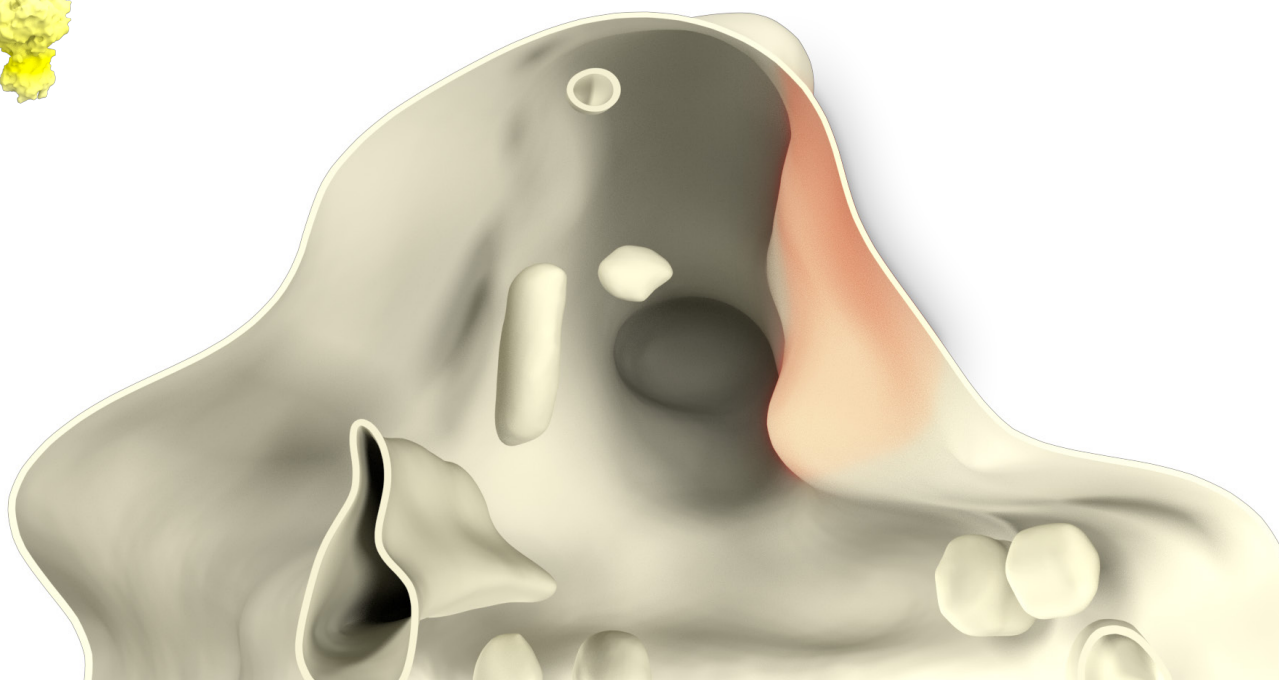

## References

**Antibody:** Novus Biologicals NBP1-95482

**PDB Identifier:** 3spi

### Literature:

Fomina et al., 2011, Biochim. Biophys. Acta.

Frank et al., 2016, Nat. Commun.

Vikstrom et al., 2009, Am. J. Physiol. Heart Circ.

Physiol.



K<sub>v</sub>1.1 (Gene: Kcna1, Uniprot ID: P10499)

Known function: Delayed rectifier potassium channel

Known organization: Transmembrane protein

Known Interactions: PSD95

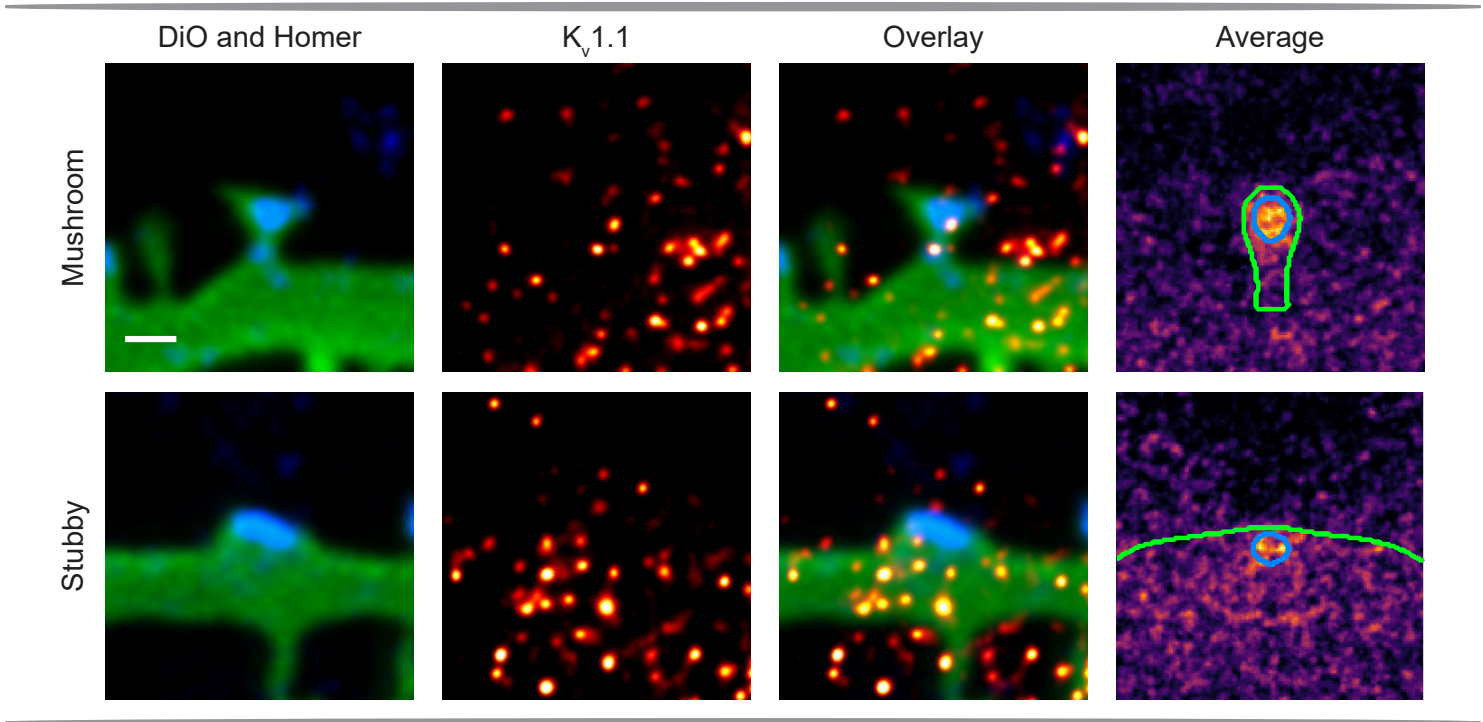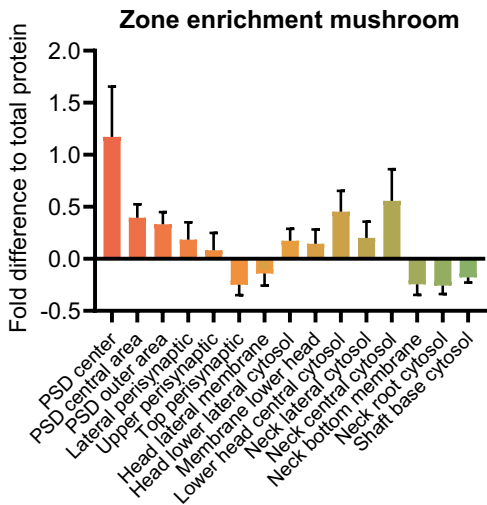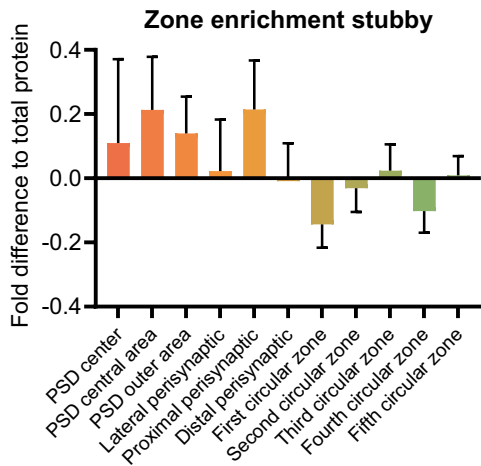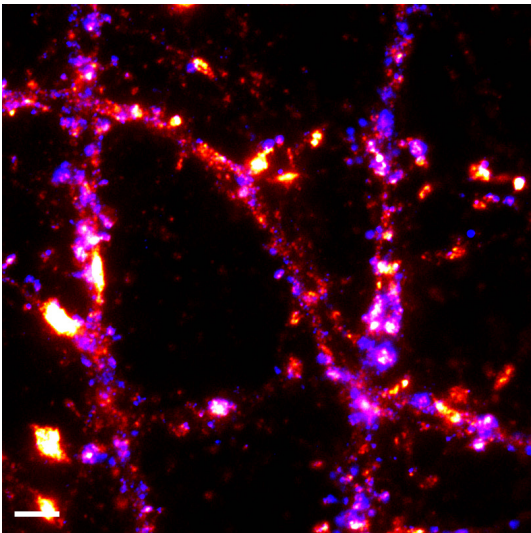

|                        |                    |             |
|------------------------|--------------------|-------------|
| Whole cell copy number | 108526.4 ± 12341.5 |             |
| Spine copy number      | 20.2 ± 4.2         |             |
| Function               | Ion channel        |             |
|                        | Mushroom           | Stubby      |
| Spine copy number      | 18.5 ± 3.8         | 23.1 ± 4.8  |
| % of total protein     | 0.0 ± 0.0%         | 0.0 ± 0.0%  |
| Molarity (μM)          | 0.2 ± 0.0          | 0.2 ± 0.0   |
| PSD copy number        | 7 ± 1.4            | 4 ± 0.8     |
| % in PSD               | 37.8 ± 7.8%        | 17.3 ± 3.6% |

|          | Spine copy number | % of total protein | Molarity ( $\mu\text{M}$ ) | PSD copy number |
|----------|-------------------|--------------------|----------------------------|-----------------|
| Mushroom | $18.5 \pm 3.8$    | $0.0 \pm 0.0\%$    | $0.2 \pm 0.0$              | $7 \pm 1.4$     |
| Stubby   | $23.1 \pm 4.8$    | $0.0 \pm 0.0\%$    | $0.2 \pm 0.0$              | $4 \pm 0.8$     |

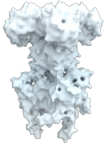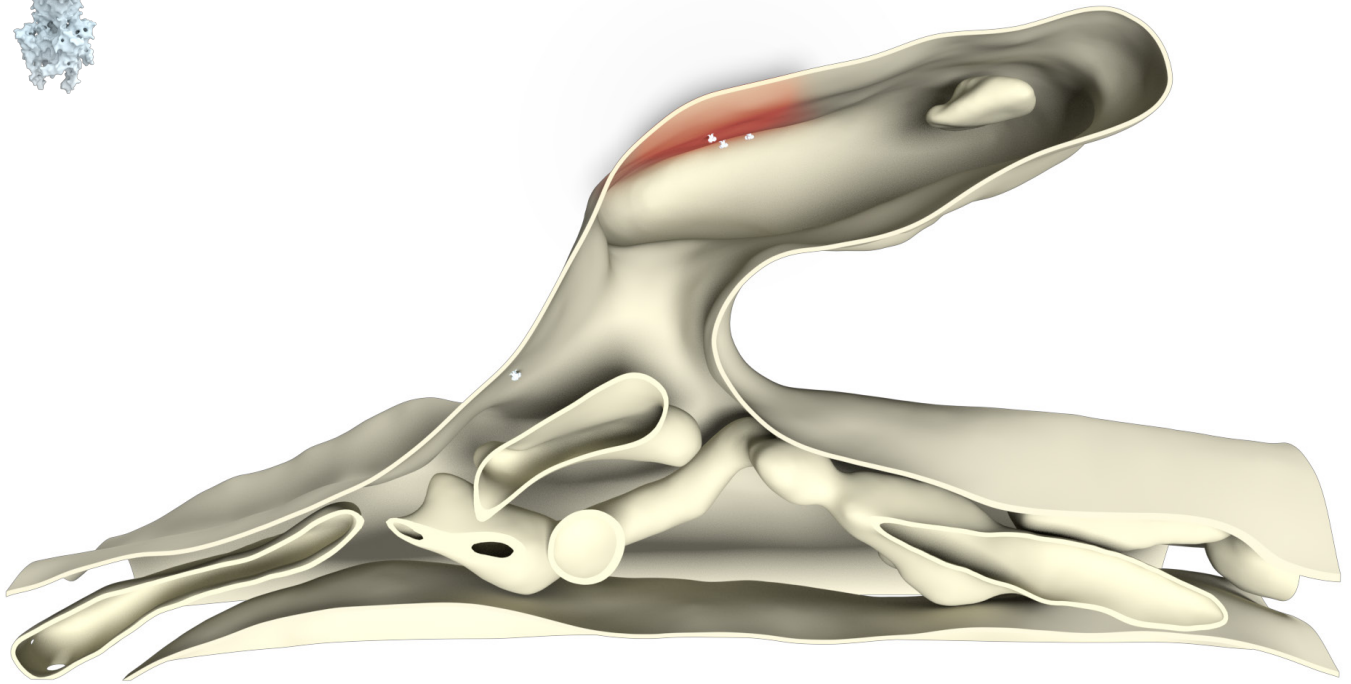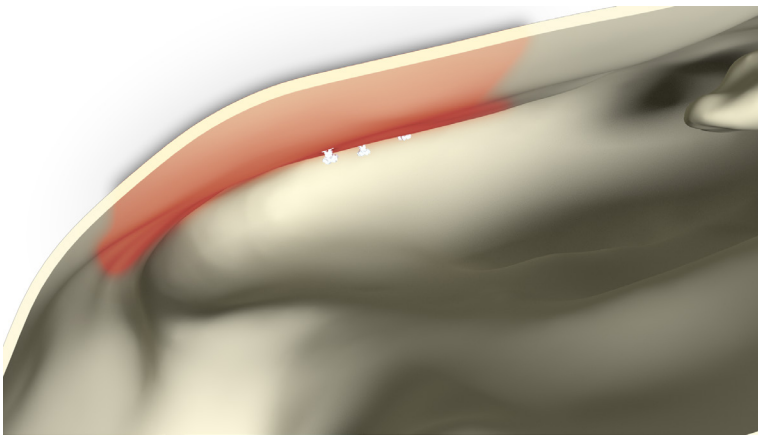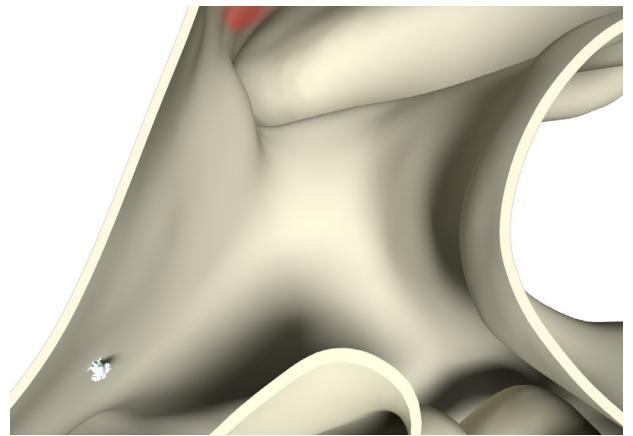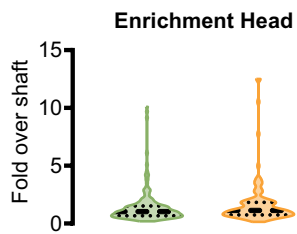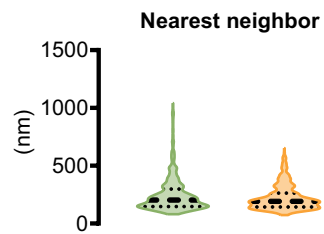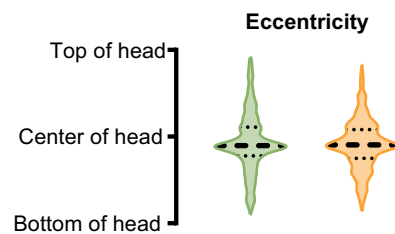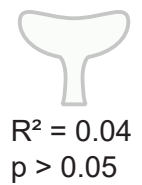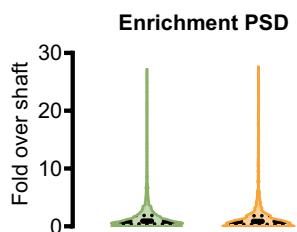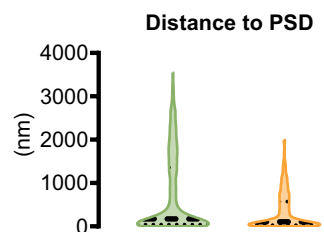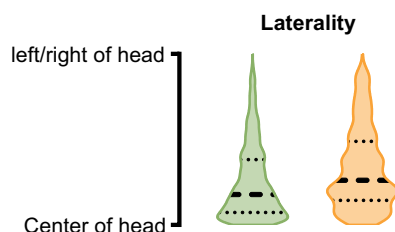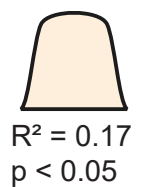

|          | Spine copy number | % of total protein | Molarity ( $\mu\text{M}$ ) | PSD copy number |
|----------|-------------------|--------------------|----------------------------|-----------------|
| Mushroom | $18.5 \pm 3.8$    | $0.0 \pm 0.0\%$    | $0.2 \pm 0.0$              | $7 \pm 1.4$     |
| Stubby   | $23.1 \pm 4.8$    | $0.0 \pm 0.0\%$    | $0.2 \pm 0.0$              | $4 \pm 0.8$     |

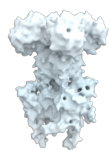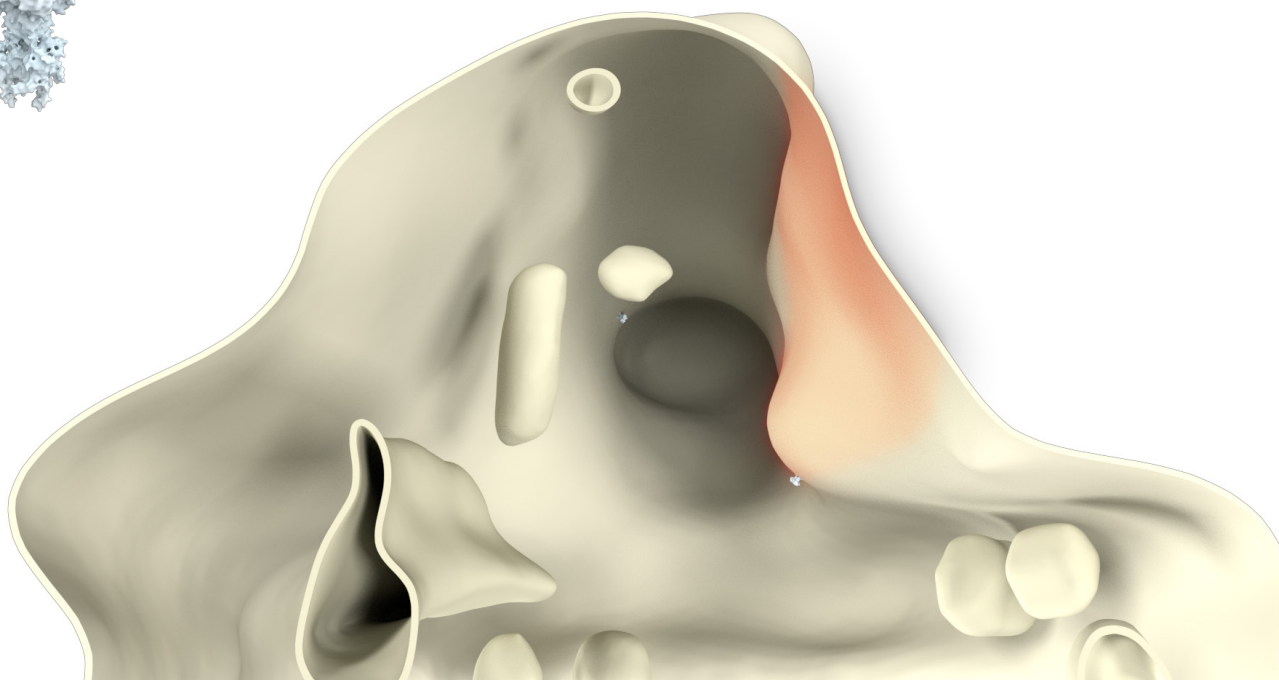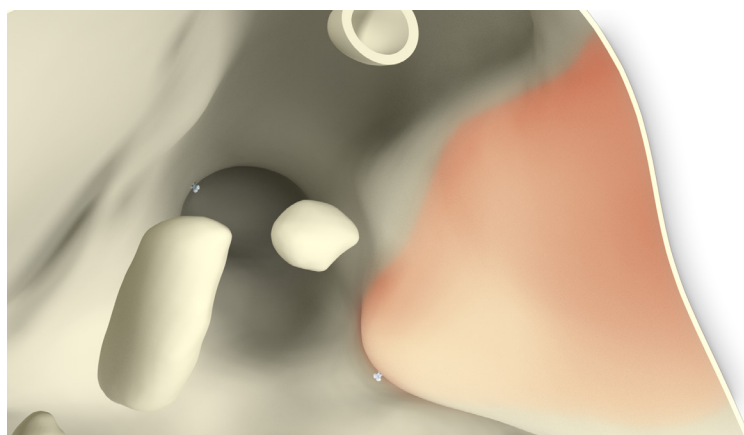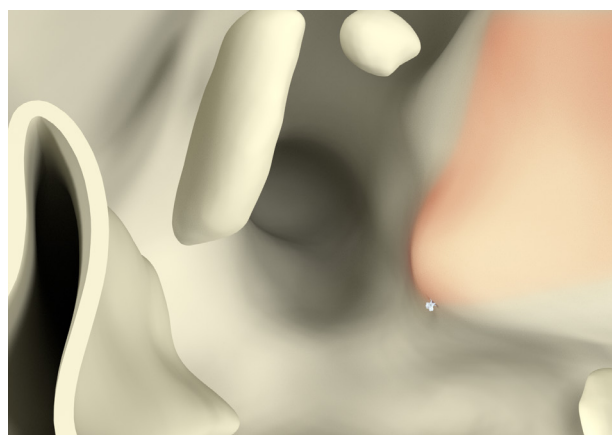

## References

**Antibody:** Thermo Scientific PA5-19593

**PDB Identifier:** 2a79

### Literature:

Kim et al., 1995, Nature

Tiffany et al., 2000, J. Cell. Biol.



## K<sub>v</sub>2.1 (Gene: Kcnb1, Uniprot ID: P15387)

**Known function:** Delayed rectifier potassium channel, Dominant type in hippocampus, Regulates gene transcription

**Known organization:** Transmembrane protein, Forms clusters on soma

**Known Interactions:** Syntaxin1

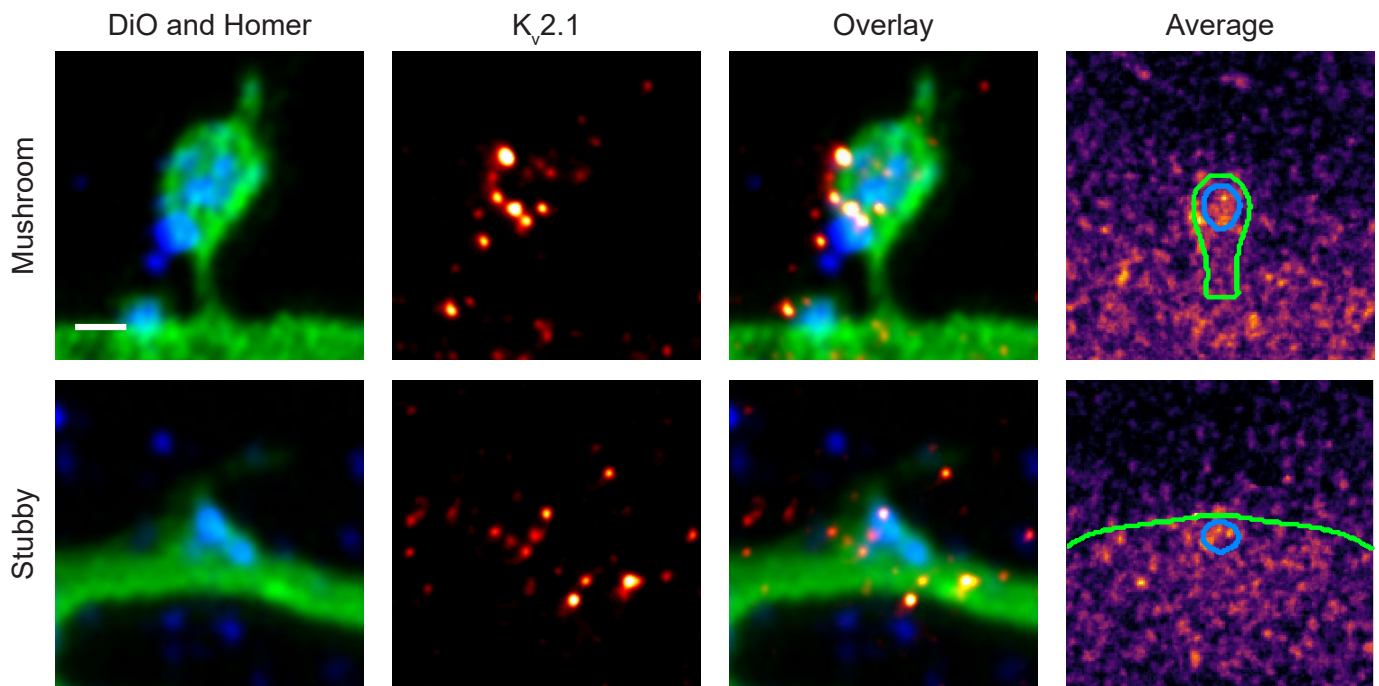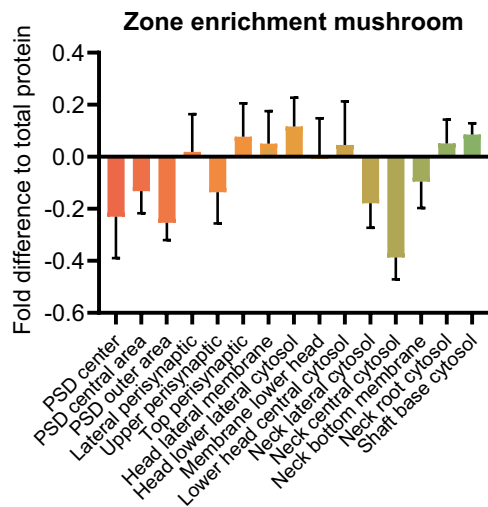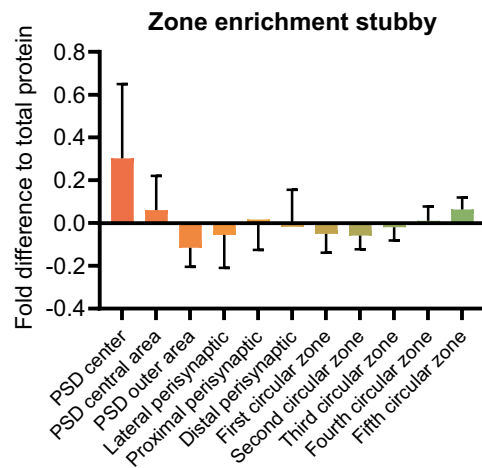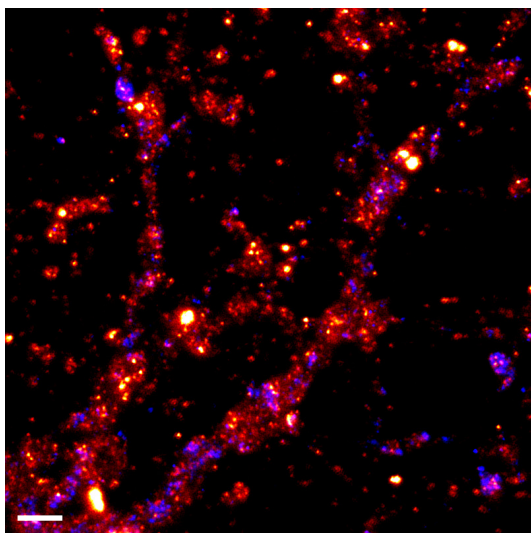

|                        |                |            |
|------------------------|----------------|------------|
| Whole cell copy number | 3092.0 ± 886.1 |            |
| Spine copy number      | 0.4 ± 0.1      |            |
| Function               | Ion channel    |            |
|                        | Mushroom       | Stubby     |
| Spine copy number      | 0.3 ± 0.1      | 0.4 ± 0.2  |
| % of total protein     | 0.0 ± 0.0%     | 0.0 ± 0.0% |
| Molarity (μM)          | 0.0 ± 0.0      | 0.0 ± 0.0  |
| PSD copy number        | 0 ± 0.0        | 0 ± 0.0    |
| % in PSD               | 0.0 ± 0.0%     | 0.0 ± 0.0% |

|          | Spine copy number | % of total protein | Molarity ( $\mu\text{M}$ ) | PSD copy number |
|----------|-------------------|--------------------|----------------------------|-----------------|
| Mushroom | $0.3 \pm 0.1$     | $0.0 \pm 0.0\%$    | $0.0 \pm 0.0$              | $0 \pm 0.0$     |
| Stubby   | $0.4 \pm 0.2$     | $0.0 \pm 0.0\%$    | $0.0 \pm 0.0$              | $0 \pm 0.0$     |

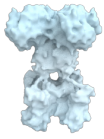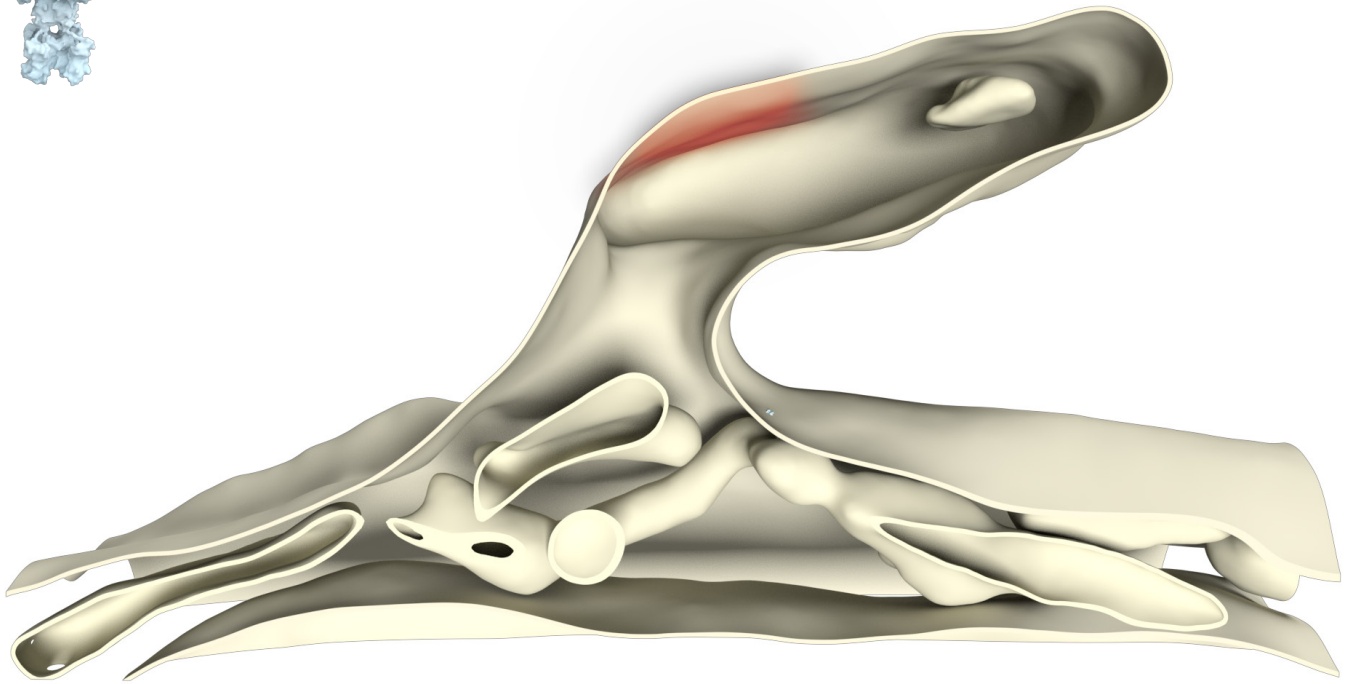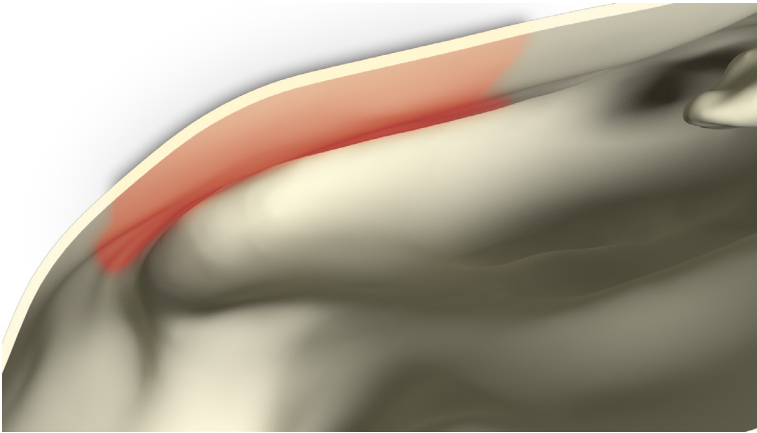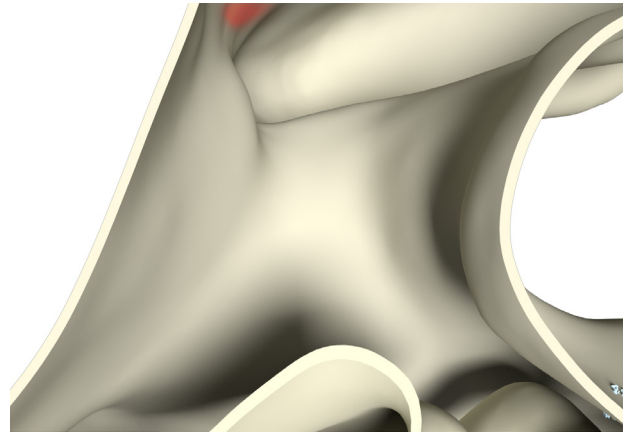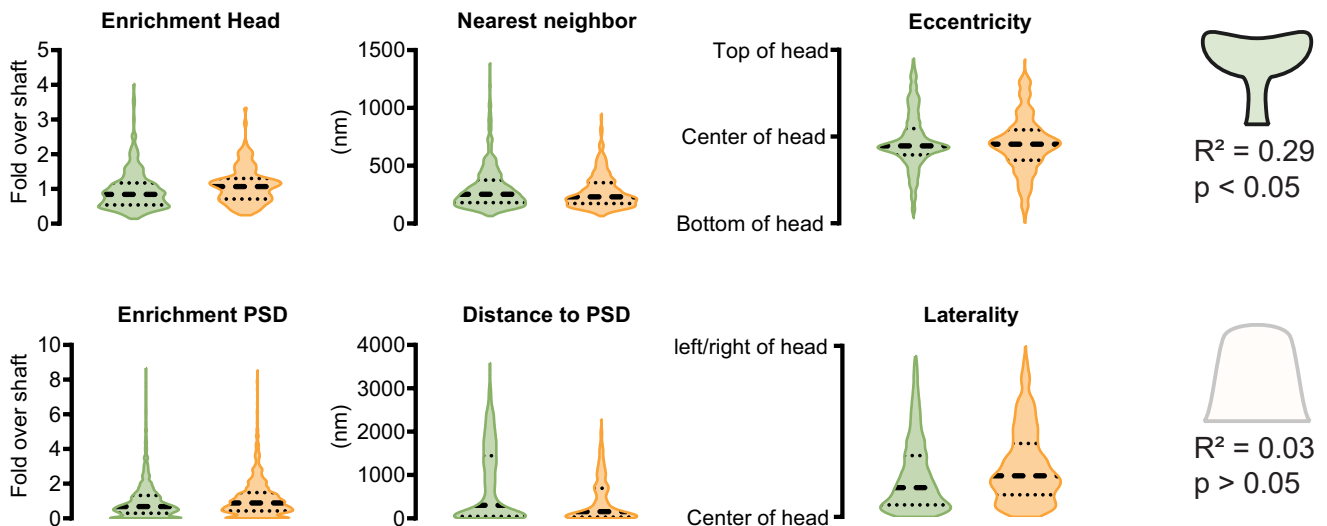

|          | Spine copy number | % of total protein | Molarity ( $\mu\text{M}$ ) | PSD copy number |
|----------|-------------------|--------------------|----------------------------|-----------------|
| Mushroom | $0.3 \pm 0.1$     | $0.0 \pm 0.0\%$    | $0.0 \pm 0.0$              | $0 \pm 0.0$     |
| Stubby   | $0.4 \pm 0.2$     | $0.0 \pm 0.0\%$    | $0.0 \pm 0.0$              | $0 \pm 0.0$     |

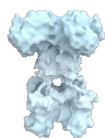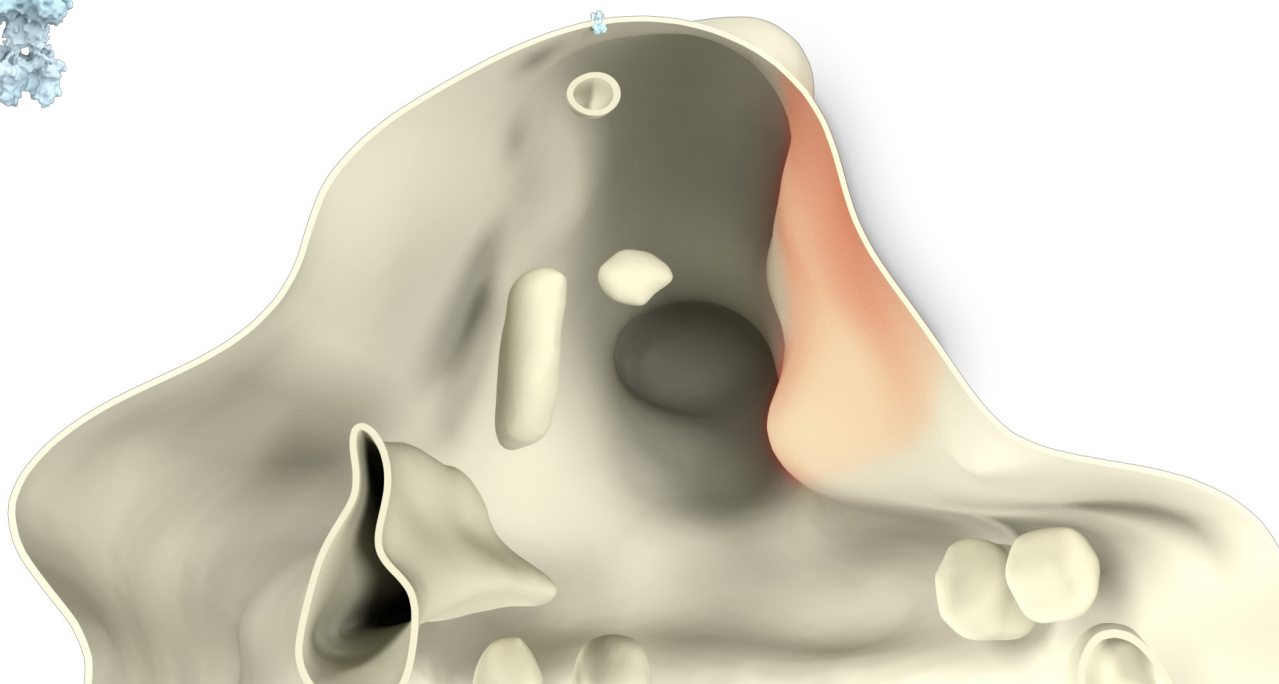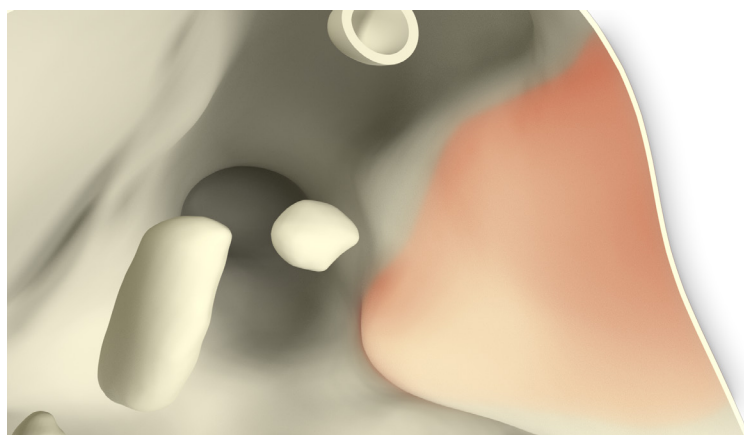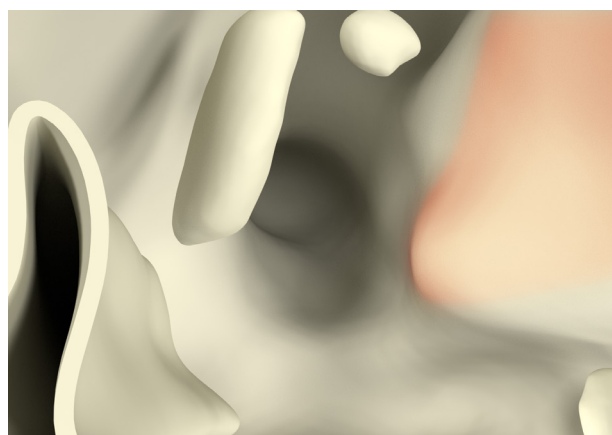

## References

**Antibody:** Synaptic Systems 231 002

**PDB Identifier:** 4jtc

### Literature:

Du et al., 2000, J Physiol.

Feinshreiber et al., 2009, Ann. N Y Acad. Sci.

Fox et al., 2013, J. Neurosci.

Lai and Jan, 2006, Nat. Rev. Neurosci.

Leung et al., 2007, Endocr. Rev.

Misonou et al., 2005, Neurotoxicology

Murakoshi and Trimmer, 1999, J. Neurosci.

O'Connell et al., 2010, Proc. Natl. Acad. Sci. U S A

Scannevin et al., 1996, J. Cell. Biol.

Trimmer, 1991, Proc. Natl. Acad. Sci. U S A



## LNGFR (p75NTR Gene: Ngfr, Uniprot ID: P07174)

**Known function:** Neurotrophic signaling, Recognizes all neurotrophins, Involved in LTD

**Known organization:** Transmembrane protein

**Known Interactions:** TrkB, BDNF

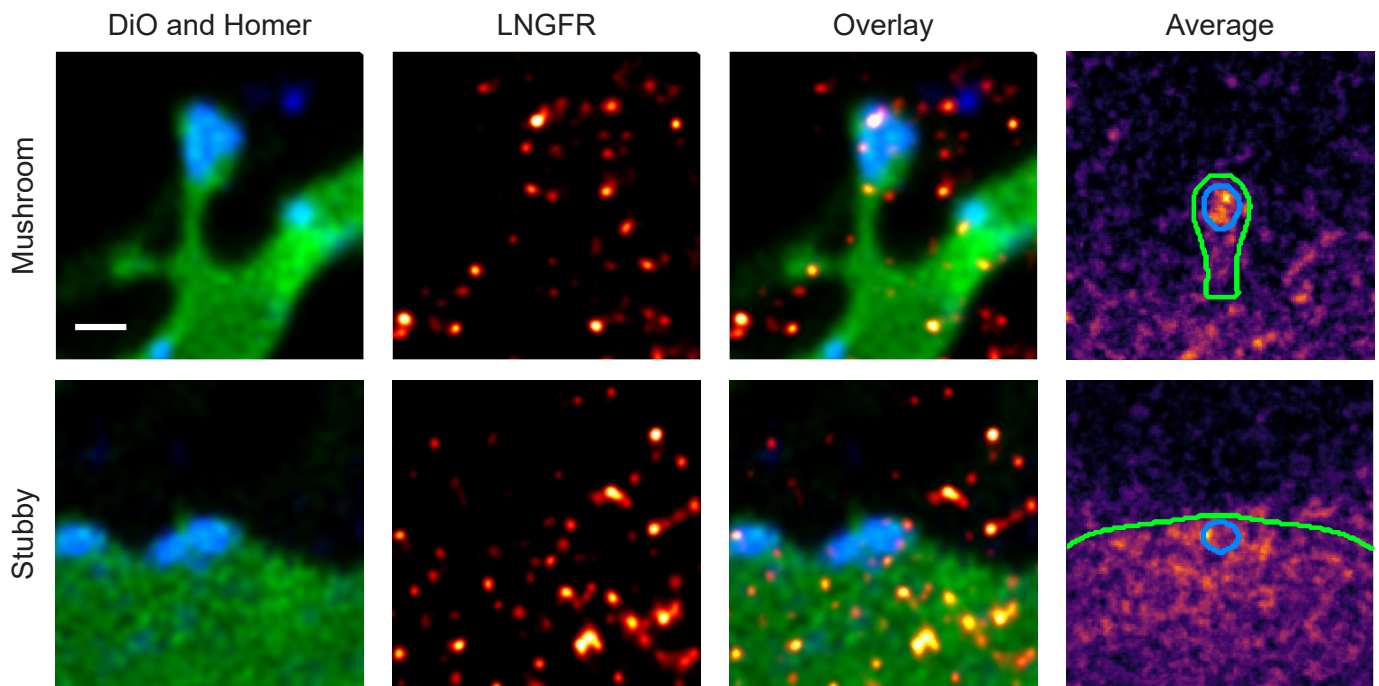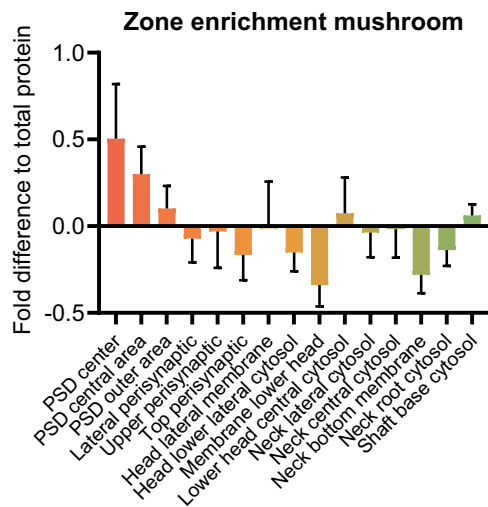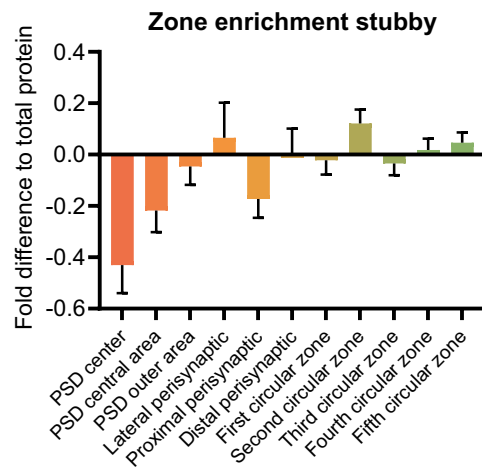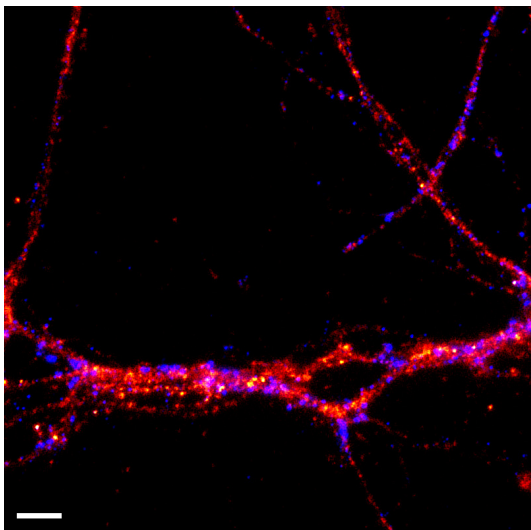

|                        |                                      |               |
|------------------------|--------------------------------------|---------------|
| Whole cell copy number | 2945133.1 ± 1352814.7 (extrapolated) |               |
| Spine copy number      | 535.5 ± 262.0                        |               |
| Function               | Receptor                             |               |
|                        | Mushroom                             | Stubby        |
| Spine copy number      | 437.0 ± 213.8                        | 692.4 ± 338.7 |
| % of total protein     | 0.1 ± 0.0%                           | 0.1 ± 0.1%    |
| Molarity (μM)          | 5.5 ± 2.7                            | 6.5 ± 3.2     |
| PSD copy number        | 136 ± 66.5                           | 102 ± 49.9    |
| % in PSD               | 31.1 ± 15.2%                         | 14.7 ± 7.2%   |

|          | Spine copy number | % of total protein | Molarity ( $\mu\text{M}$ ) | PSD copy number |
|----------|-------------------|--------------------|----------------------------|-----------------|
| Mushroom | $437.0 \pm 213.8$ | $0.1 \pm 0.0\%$    | $5.5 \pm 2.7$              | $136 \pm 66.5$  |
| Stubby   | $692.4 \pm 338.7$ | $0.1 \pm 0.1\%$    | $6.5 \pm 3.2$              | $102 \pm 49.9$  |

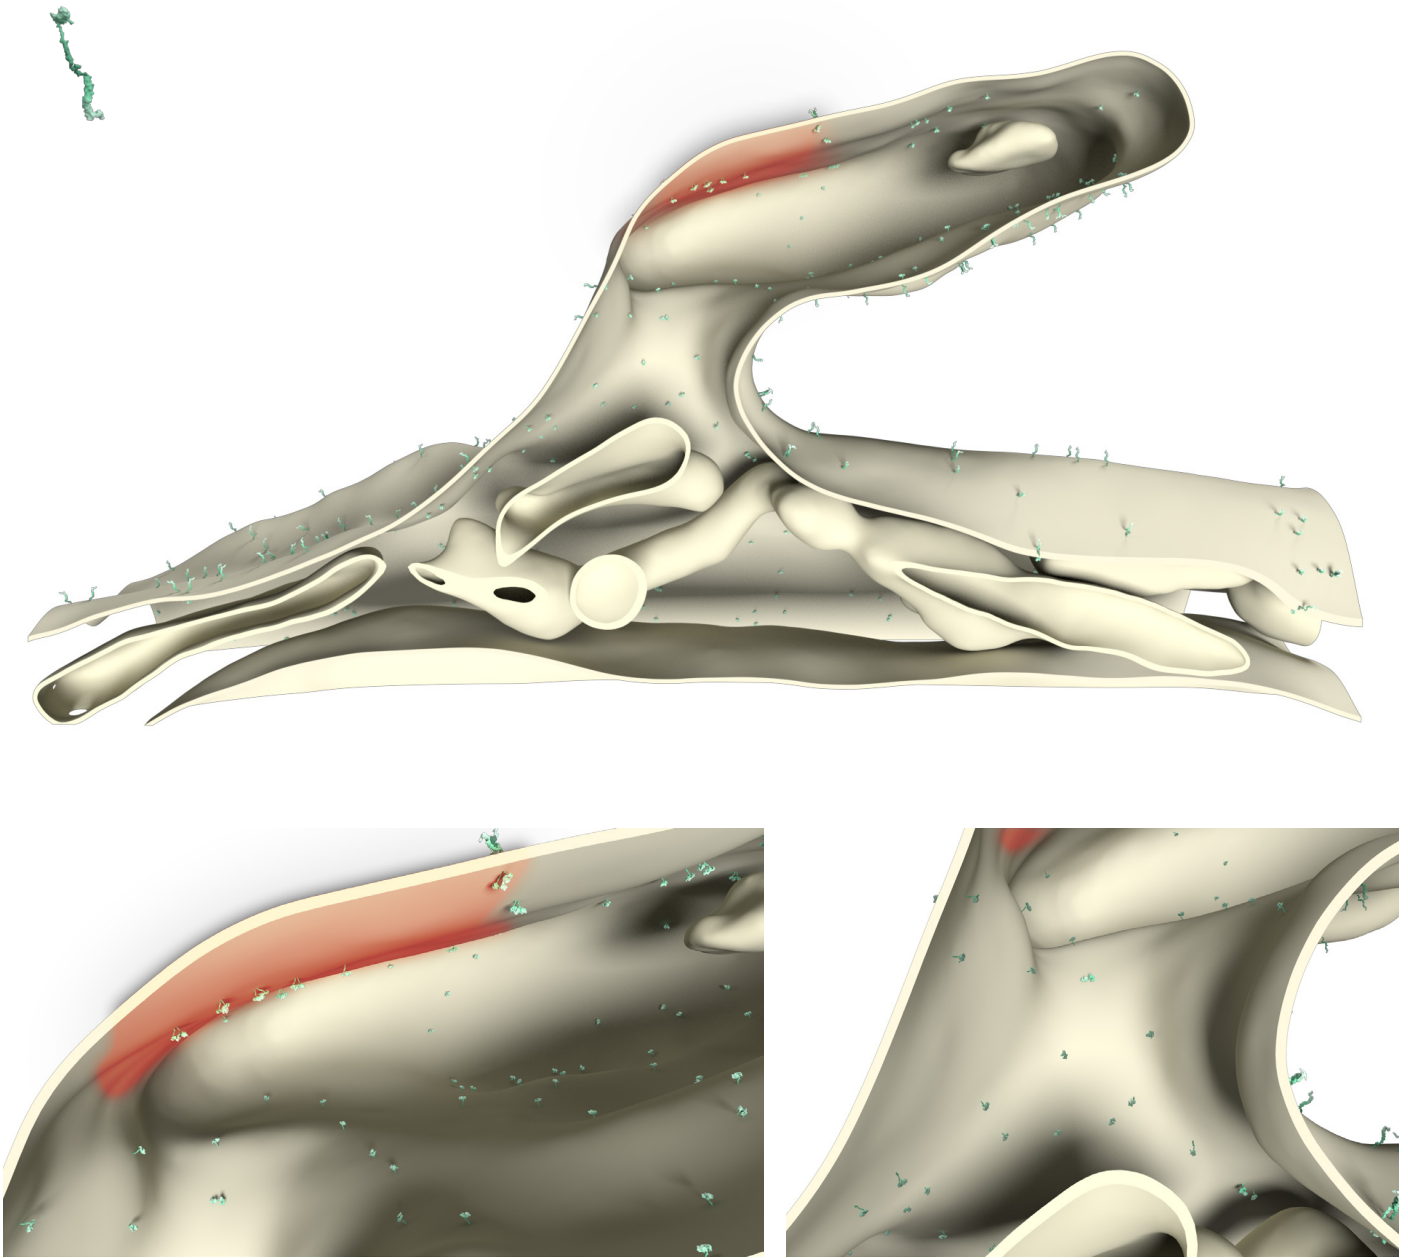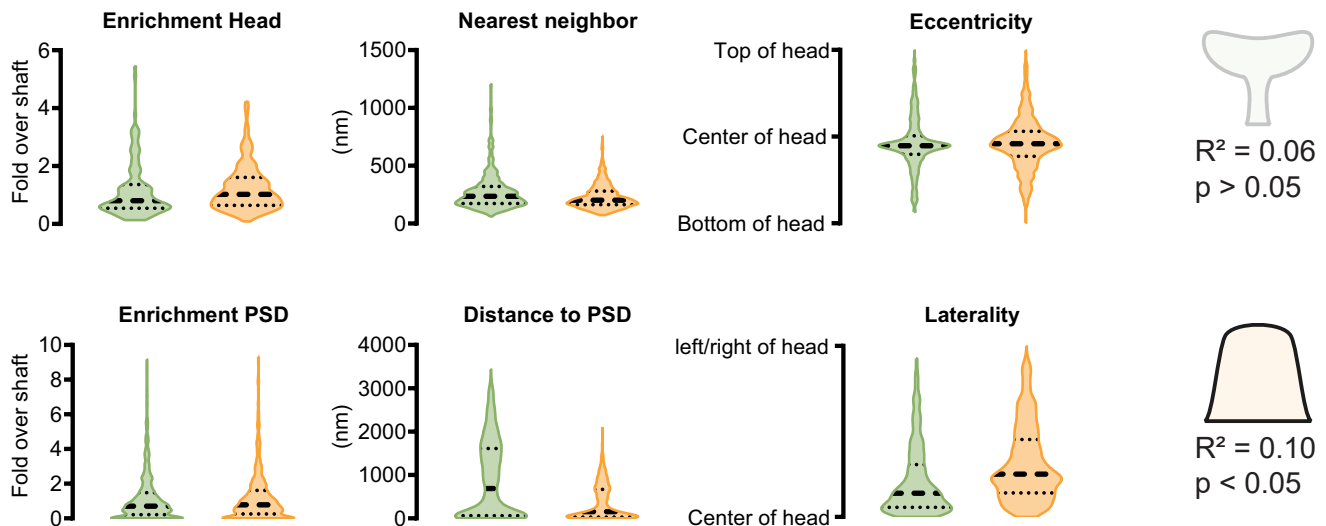

|          | Spine copy number | % of total protein | Molarity ( $\mu\text{M}$ ) | PSD copy number |
|----------|-------------------|--------------------|----------------------------|-----------------|
| Mushroom | $437.0 \pm 213.8$ | $0.1 \pm 0.0\%$    | $5.5 \pm 2.7$              | $136 \pm 66.5$  |
| Stubby   | $692.4 \pm 338.7$ | $0.1 \pm 0.1\%$    | $6.5 \pm 3.2$              | $102 \pm 49.9$  |

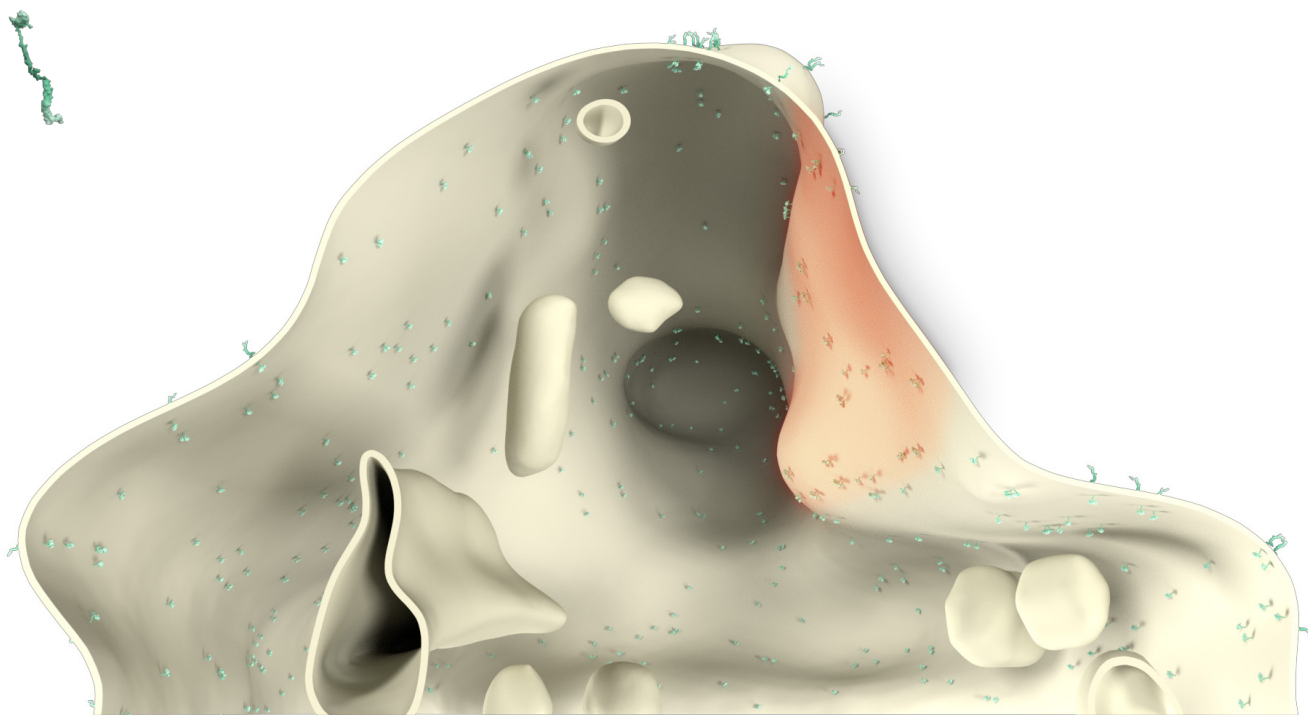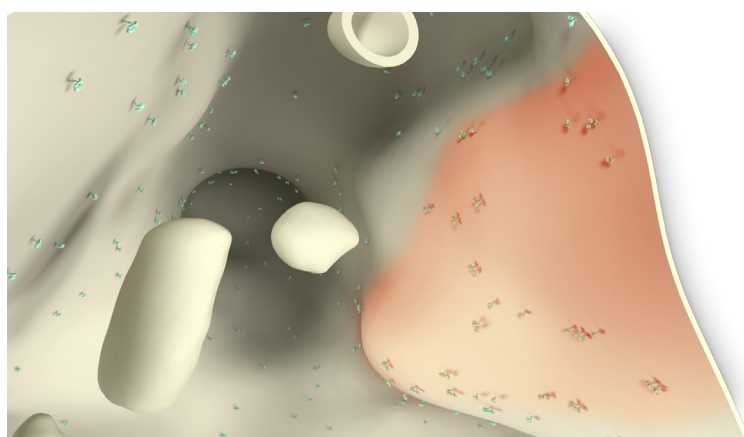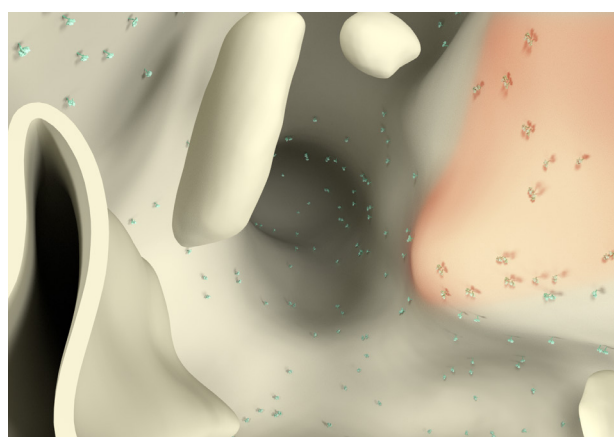

## References

**Antibody:** Cell Signaling 8238

**PDB Identifier:** 2mic, 4f44, 3buk

### Literature:

Barker, 1998, Cell Death Differ.

Ernfors et al., 1990, Proc. Natl. Acad. Sci. U S A

Leal et al., 2015, Brain Res.

Rodriguez-Tébar et al., 1990, Neuron

Yang et al., 2009, Na. Neurosci.

Yang et al., 2014, Cell Rep.



mAChR1 (HM1, Gene: Chrm1, Uniprot ID: P08482)

**Known function:** Activates PLC, Regulates intracellular calcium release, Reduces potassium conductance

**Known organization:** Transmembrane protein, Enriched at dendrites and PSDs

**Known Interactions:** G<sub>q</sub> coupled

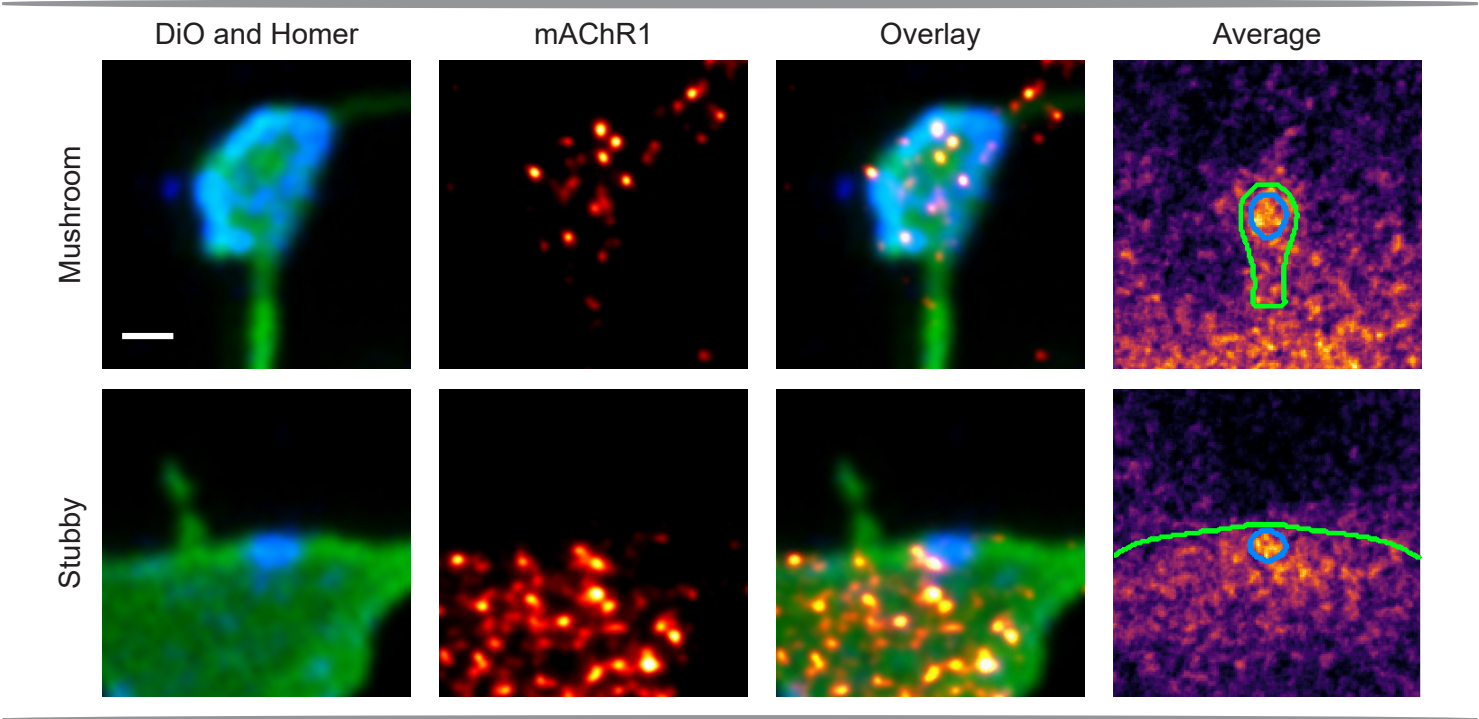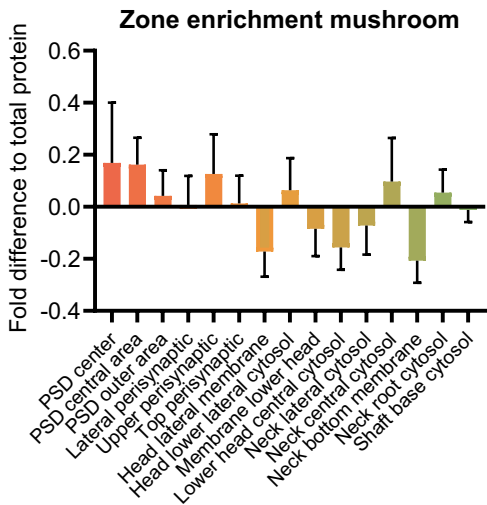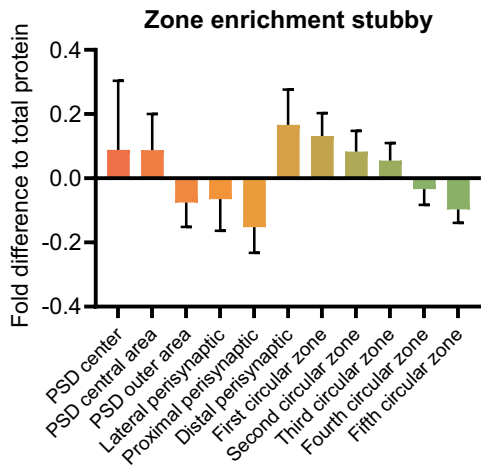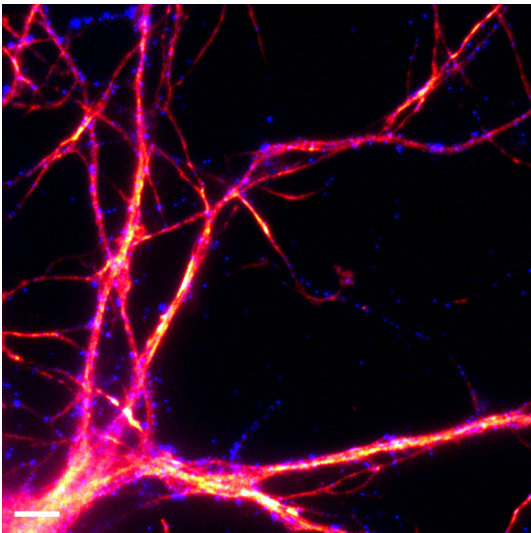

|                        |                    |             |
|------------------------|--------------------|-------------|
| Whole cell copy number | 167243.2 ± 38253.7 |             |
| Spine copy number      | 33.9 ± 8.7         |             |
| Function               | Receptor           |             |
|                        | Mushroom           | Stubby      |
| Spine copy number      | 25.9 ± 6.6         | 42.7 ± 10.9 |
| % of total protein     | 0.0 ± 0.0%         | 0.0 ± 0.0%  |
| Molarity (μM)          | 0.3 ± 0.1          | 0.4 ± 0.1   |
| PSD copy number        | 6 ± 1.5            | 7 ± 1.8     |
| % in PSD               | 23.2 ± 5.9%        | 16.4 ± 4.2% |

|          | Spine copy number | % of total protein | Molarity ( $\mu\text{M}$ ) | PSD copy number |
|----------|-------------------|--------------------|----------------------------|-----------------|
| Mushroom | $25.9 \pm 6.6$    | $0.0 \pm 0.0\%$    | $0.3 \pm 0.1$              | $6 \pm 1.5$     |
| Stubby   | $42.7 \pm 10.9$   | $0.0 \pm 0.0\%$    | $0.4 \pm 0.1$              | $7 \pm 1.8$     |

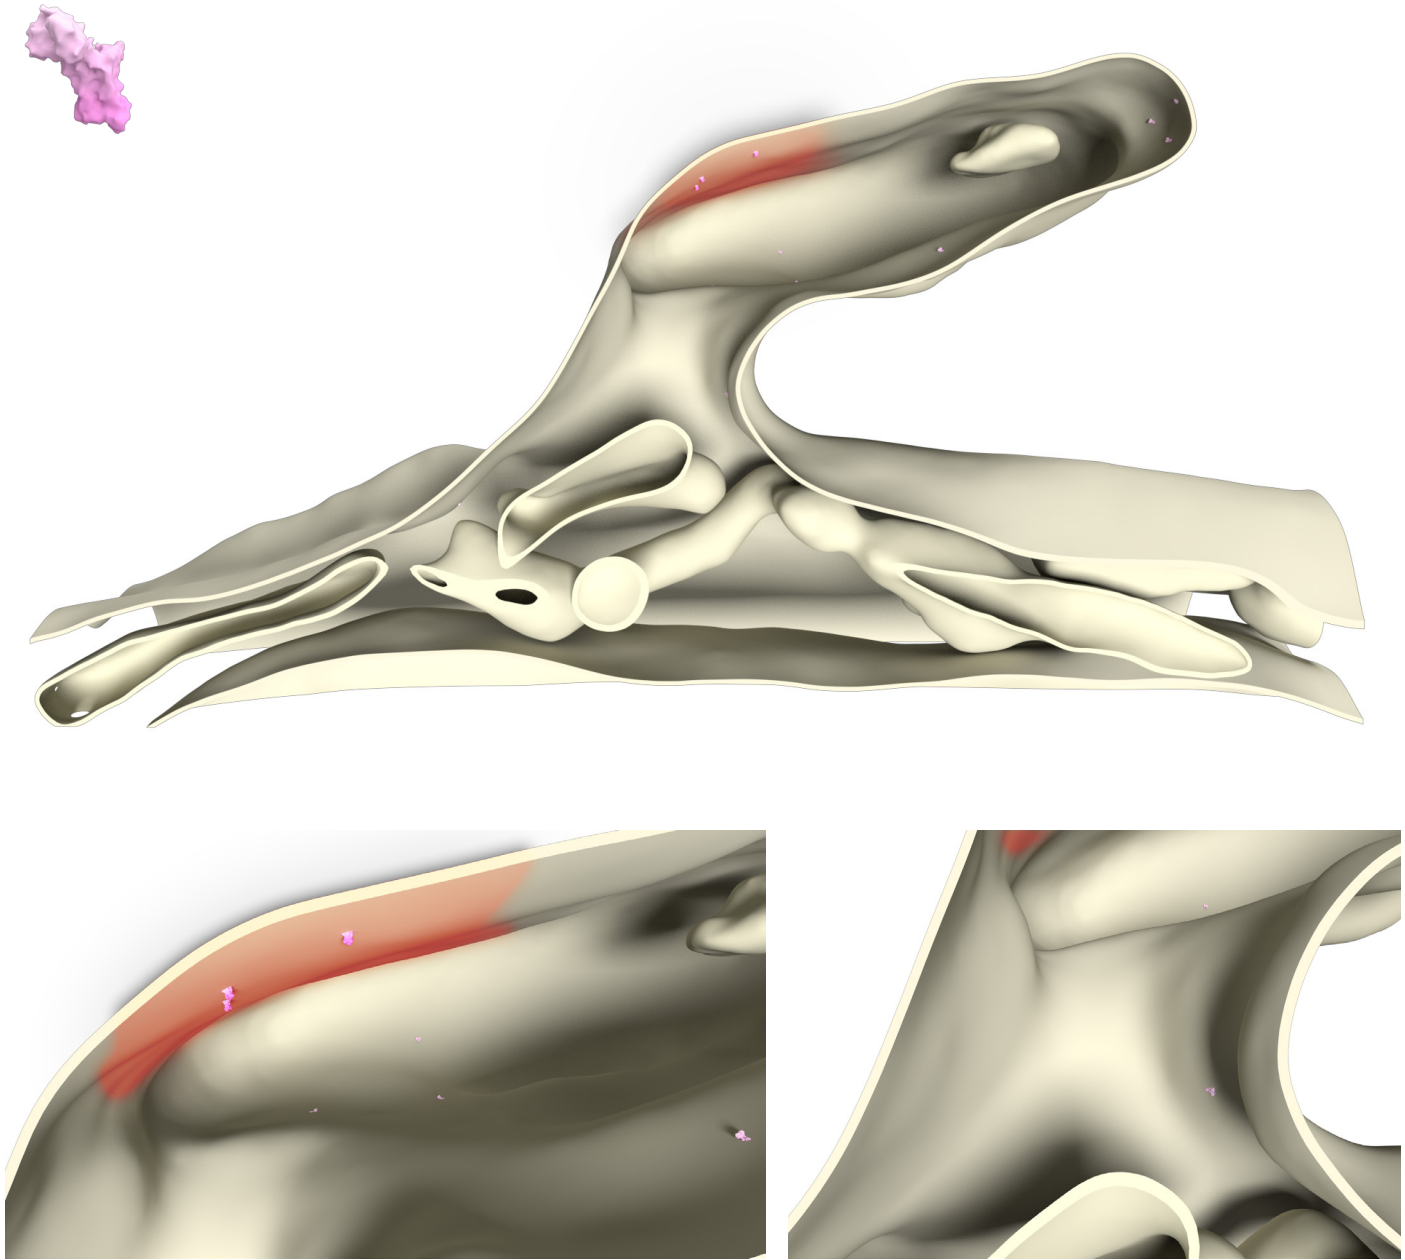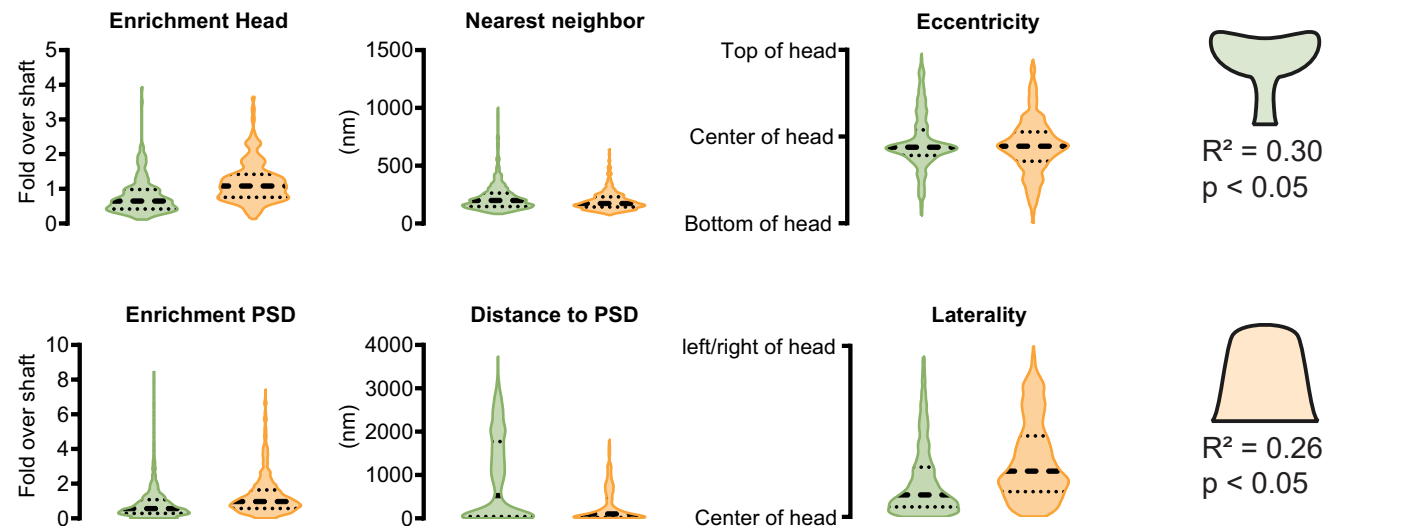

|          | Spine copy number | % of total protein | Molarity ( $\mu\text{M}$ ) | PSD copy number |
|----------|-------------------|--------------------|----------------------------|-----------------|
| Mushroom | $25.9 \pm 6.6$    | $0.0 \pm 0.0\%$    | $0.3 \pm 0.1$              | $6 \pm 1.5$     |
| Stubby   | $42.7 \pm 10.9$   | $0.0 \pm 0.0\%$    | $0.4 \pm 0.1$              | $7 \pm 1.8$     |

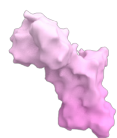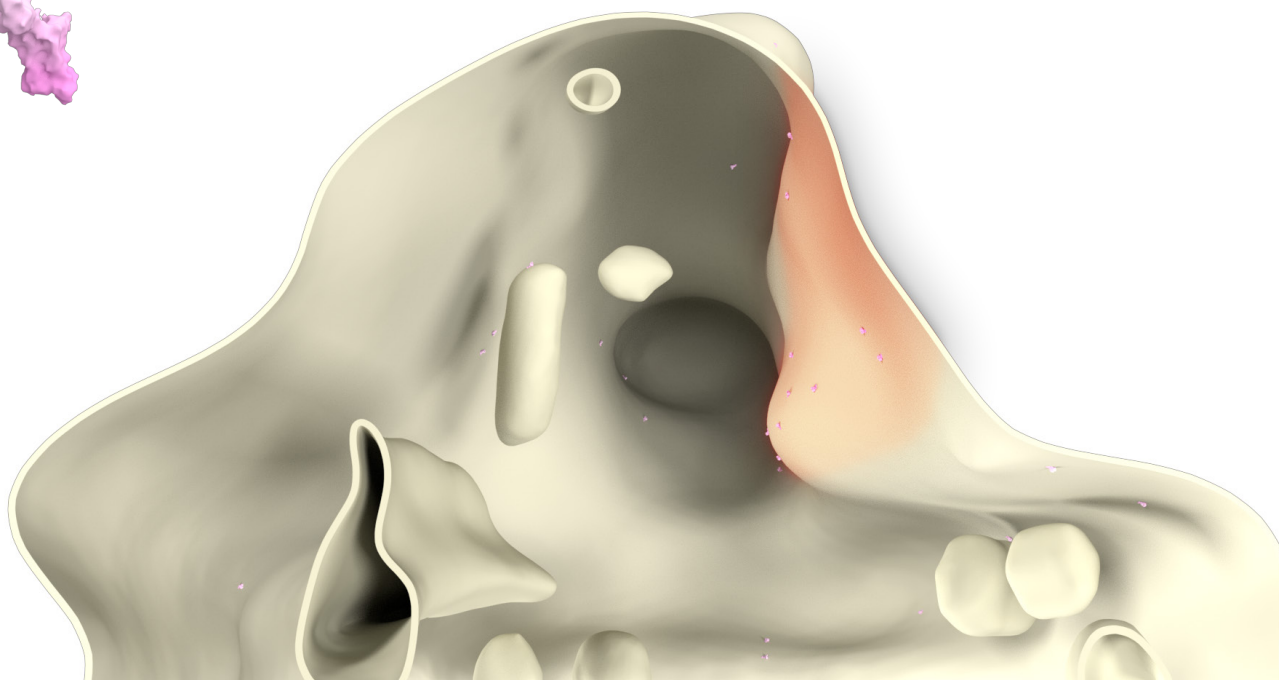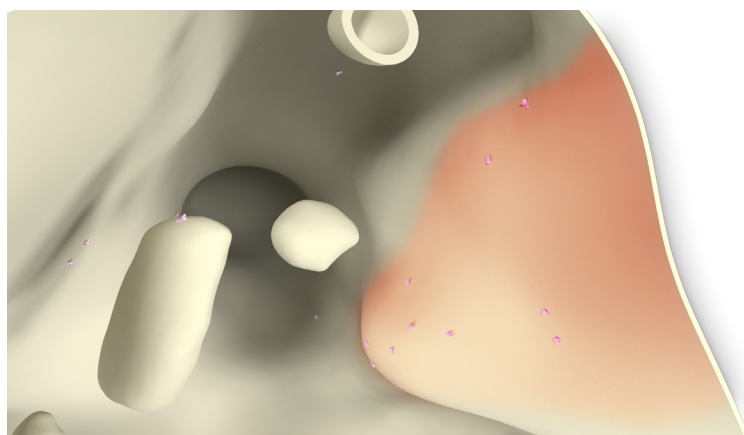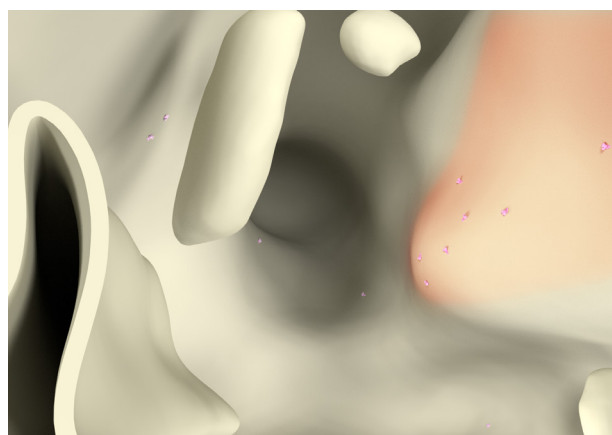

## References

**Antibody:** Novus Biologicals NBP1-87466

**PDB Identifier:** 5cxv

### Literature:

Egorov et al., 2002, Nature

Hersch et al., 1994, J. Neurosci.

Smith and Araneda, 2010, J. Neurophysiol.

Uchimura and North, 1990, J. Physiol.



MAP2 (Gene: Map2, Uniprot ID: P15146)

Known function: Stabilizes microtubules, Crosslinks microtubules with neurofilaments

Known organization: Cytosolic

Known Interactions: Microtubules, Neurofilaments

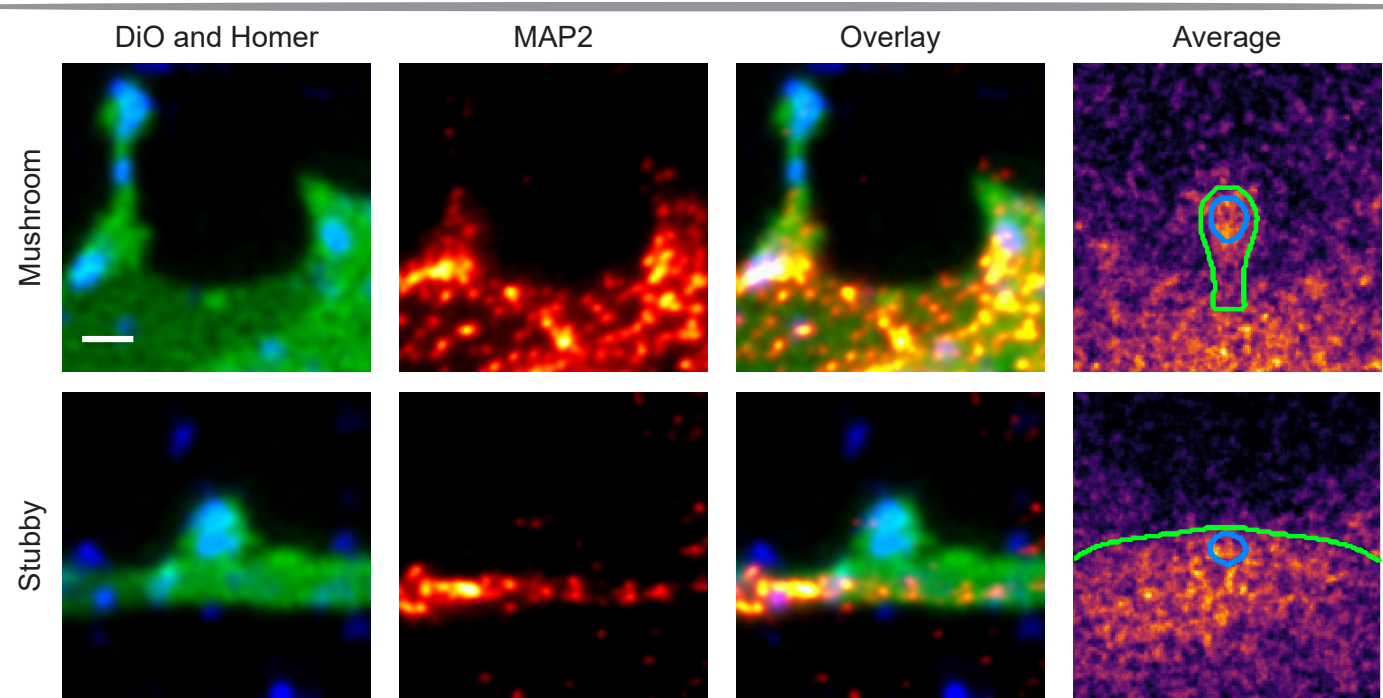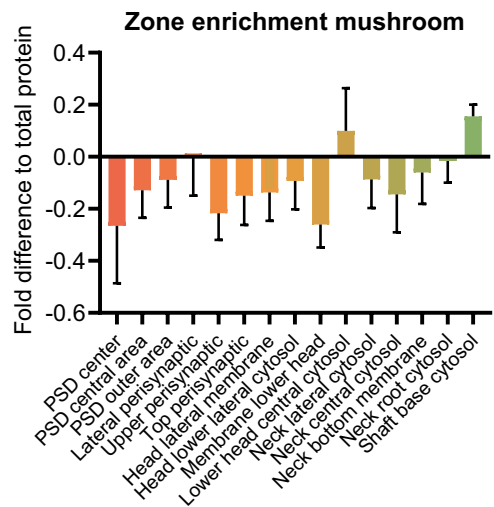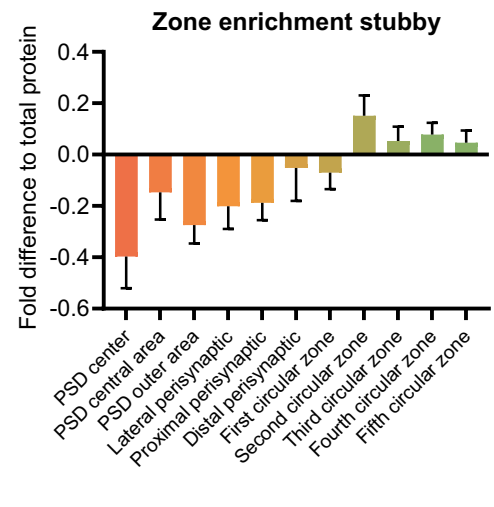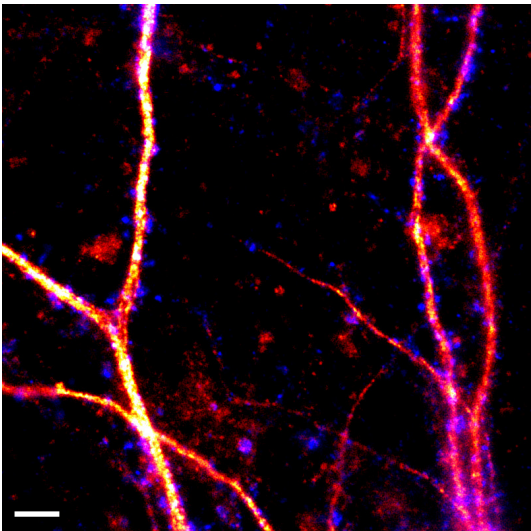

|                        |                                      |                 |
|------------------------|--------------------------------------|-----------------|
| Whole cell copy number | 9870823.5 ± 4489022.1 (extrapolated) |                 |
| Spine copy number      | 2461.7 ± 991.2                       |                 |
| Function               | Cytoskeleton                         |                 |
|                        | Mushroom                             | Stubby          |
| Spine copy number      | 1784.8 ± 718.7                       | 3424.1 ± 1378.7 |
| % of total protein     | 1.7 ± 0.7%                           | 2.8 ± 1.1%      |
| Molarity (µM)          | 22.7 ± 9.1                           | 32.4 ± 13.0     |
| PSD copy number        | 283 ± 114.0                          | 399 ± 160.7     |
| % in PSD               | 15.9 ± 6.4%                          | 11.7 ± 4.7%     |

|          | Spine copy number   | % of total protein | Molarity ( $\mu\text{M}$ ) | PSD copy number |
|----------|---------------------|--------------------|----------------------------|-----------------|
| Mushroom | $1784.8 \pm 718.7$  | $1.7 \pm 0.7\%$    | $22.7 \pm 9.1$             | $283 \pm 114.0$ |
| Stubby   | $3424.1 \pm 1378.7$ | $2.8 \pm 1.1\%$    | $32.4 \pm 13.0$            | $399 \pm 160.7$ |

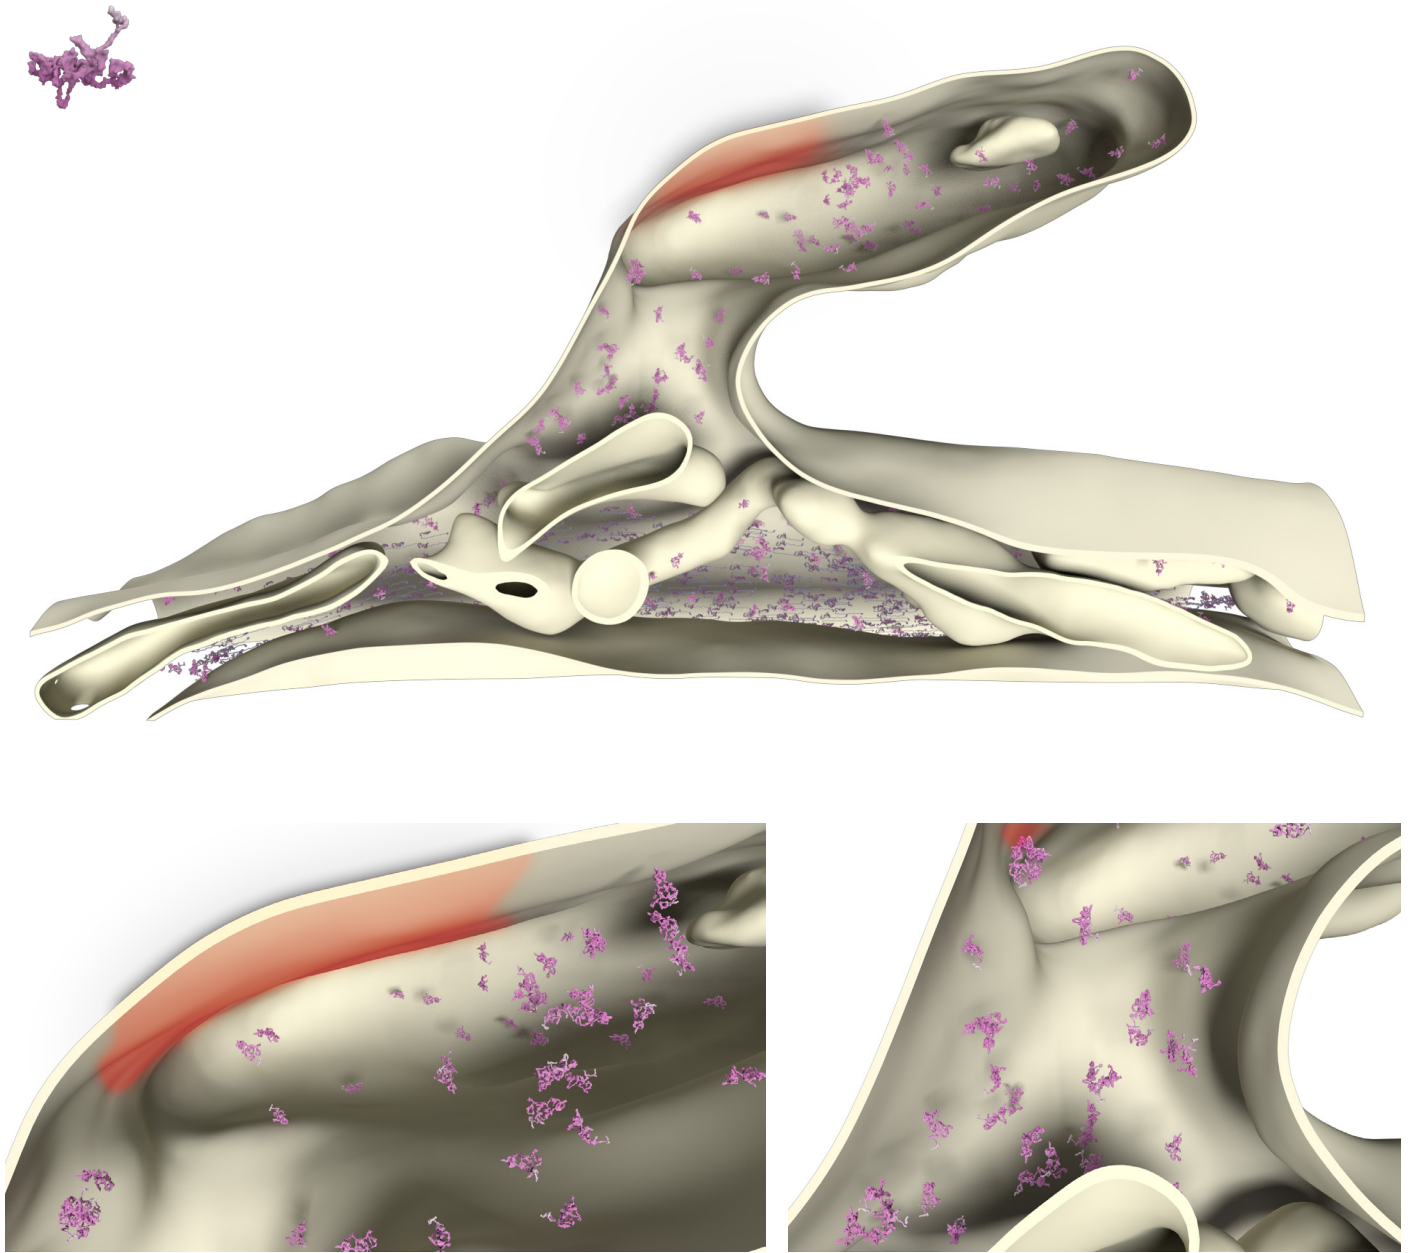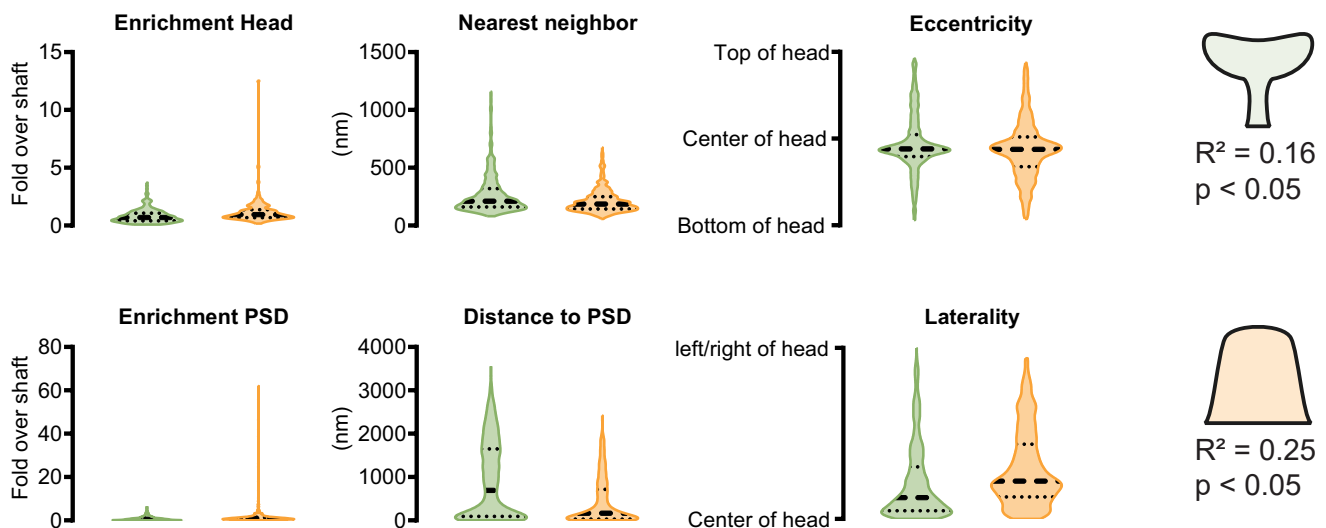

|          | Spine copy number   | % of total protein | Molarity ( $\mu\text{M}$ ) | PSD copy number |
|----------|---------------------|--------------------|----------------------------|-----------------|
| Mushroom | $1784.8 \pm 718.7$  | $1.7 \pm 0.7\%$    | $22.7 \pm 9.1$             | $283 \pm 114.0$ |
| Stubby   | $3424.1 \pm 1378.7$ | $2.8 \pm 1.1\%$    | $32.4 \pm 13.0$            | $399 \pm 160.7$ |

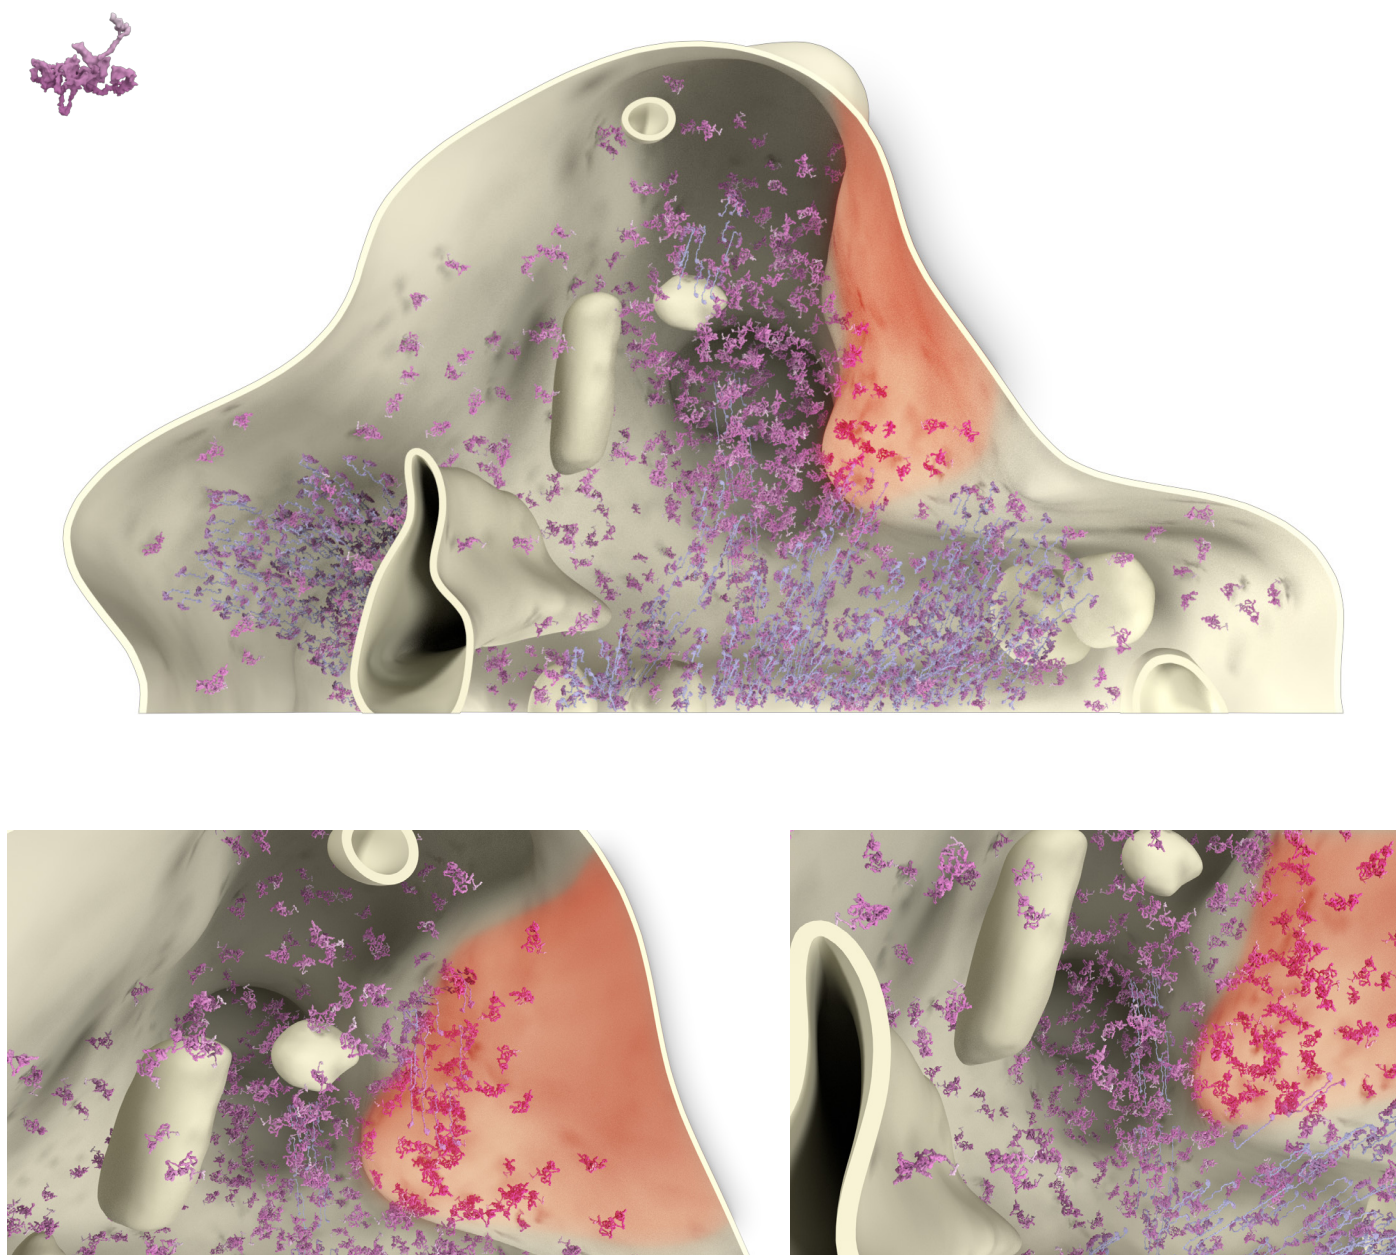

## References

**Antibody:** Synaptic Systems 188 002

**PDB Identifier:** 6cvn

### Literature:

Farah and Leclerc, 2008, Cell Motil. Cytoskeleton.

Frappier et al., 1991, Biochem. J.

Hirokawa et al., 1996, J. Cell. Biol.

Jawdat Al-Bassam et al., 2002, J. Cell Biol.



mGluR1 (Gene: Grm1, Uniprot ID: P23385)

**Known function:** Activates PKC and PLC, Regulates intracellular calcium release, Involved in LTP and homeostatic plasticity, Activates cannabinoid synthesis

**Known organization:** Transmembrane protein, Perisynaptic

**Known Interactions:** G<sub>q</sub> coupled, mGluR5, Homer proteins

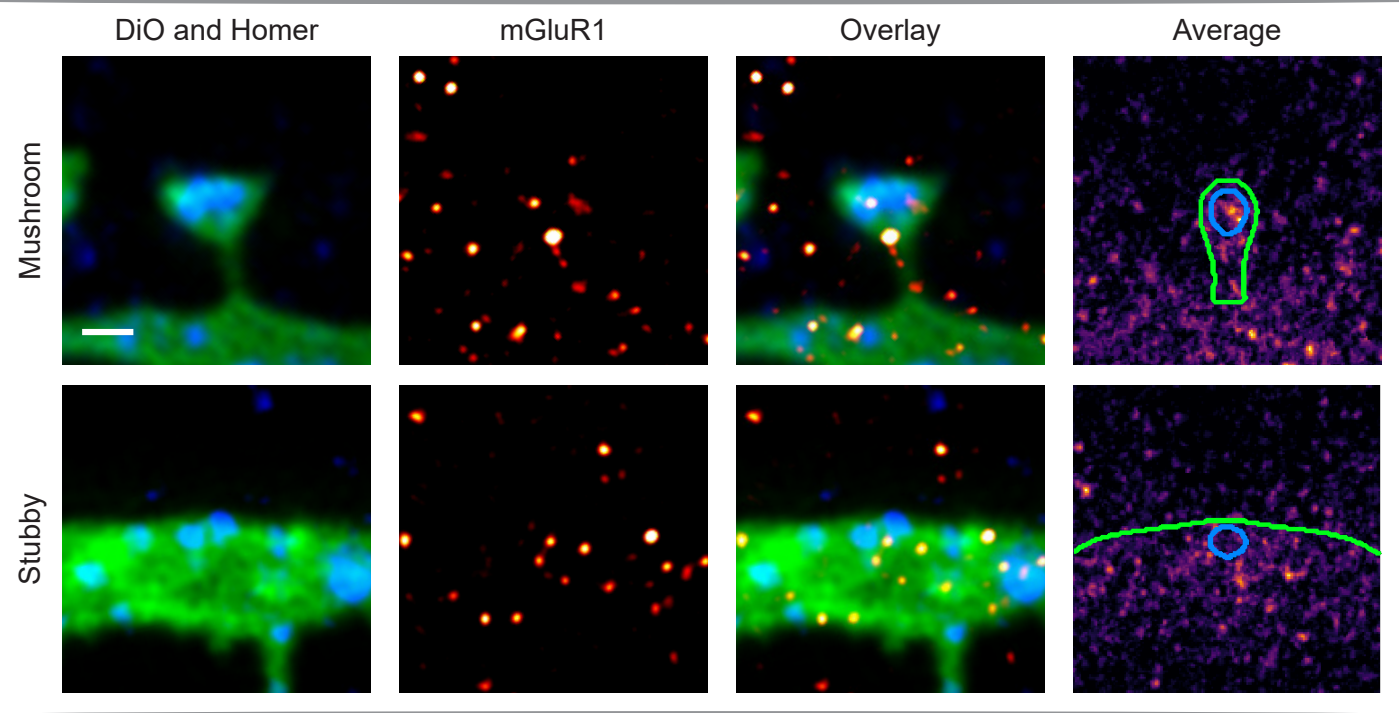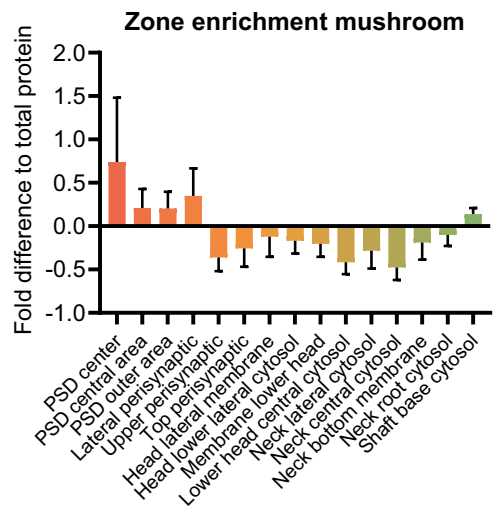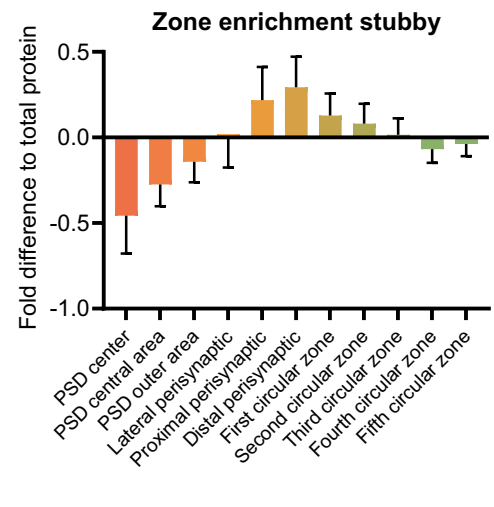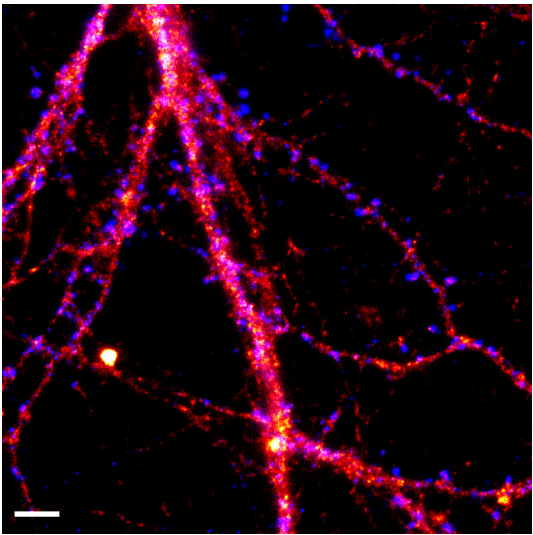

|                        |                 |            |
|------------------------|-----------------|------------|
| Whole cell copy number | 8050.9 ± 4005.3 |            |
| Spine copy number      | 0.4 ± 0.3       |            |
| Function               | Receptor        |            |
|                        | Mushroom        | Stubby     |
| Spine copy number      | 0.4 ± 0.2       | 0.5 ± 0.3  |
| % of total protein     | 0.0 ± 0.0%      | 0.0 ± 0.0% |
| Molarity (μM)          | 0.0 ± 0.0       | 0.0 ± 0.0  |
| PSD copy number        | 0 ± 0.0         | 0 ± 0.0    |
| % in PSD               | 0.0 ± 0.0%      | 0.0 ± 0.0% |

|          | Spine copy number | % of total protein | Molarity ( $\mu\text{M}$ ) | PSD copy number |
|----------|-------------------|--------------------|----------------------------|-----------------|
| Mushroom | $0.4 \pm 0.2$     | $0.0 \pm 0.0\%$    | $0.0 \pm 0.0$              | $0 \pm 0.0$     |
| Stubby   | $0.5 \pm 0.3$     | $0.0 \pm 0.0\%$    | $0.0 \pm 0.0$              | $0 \pm 0.0$     |

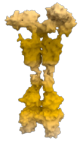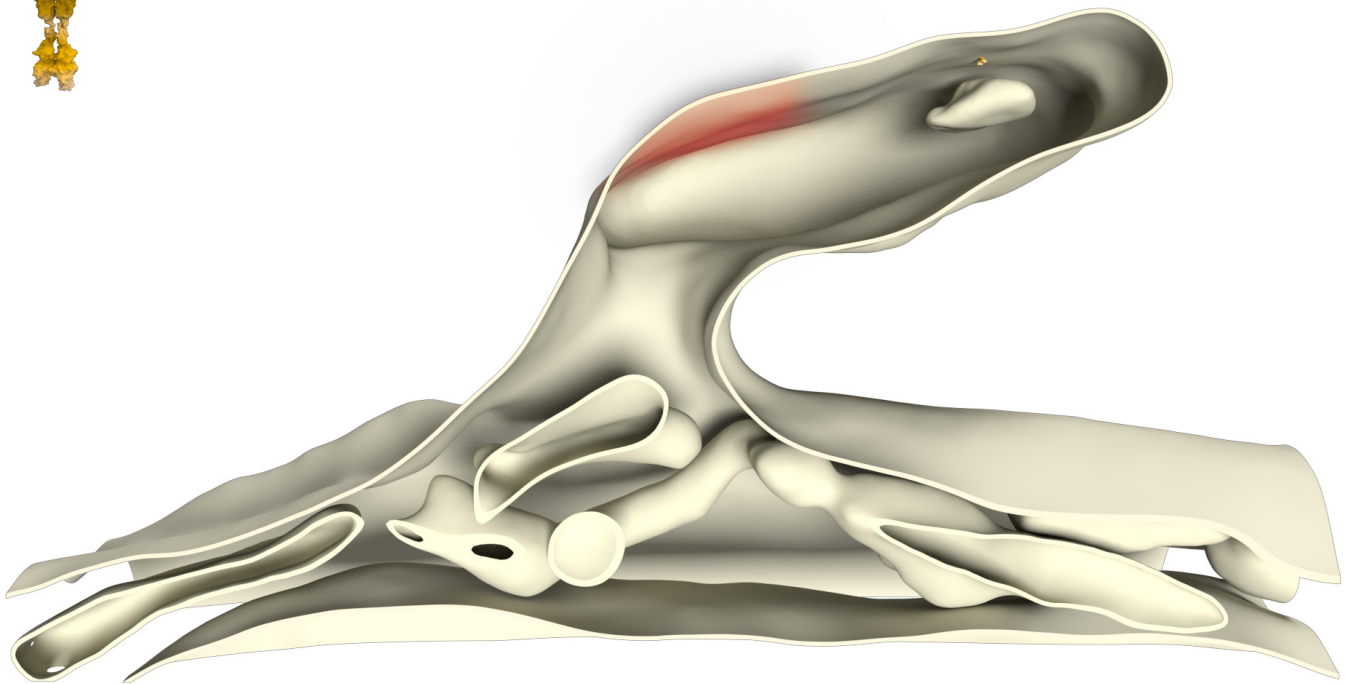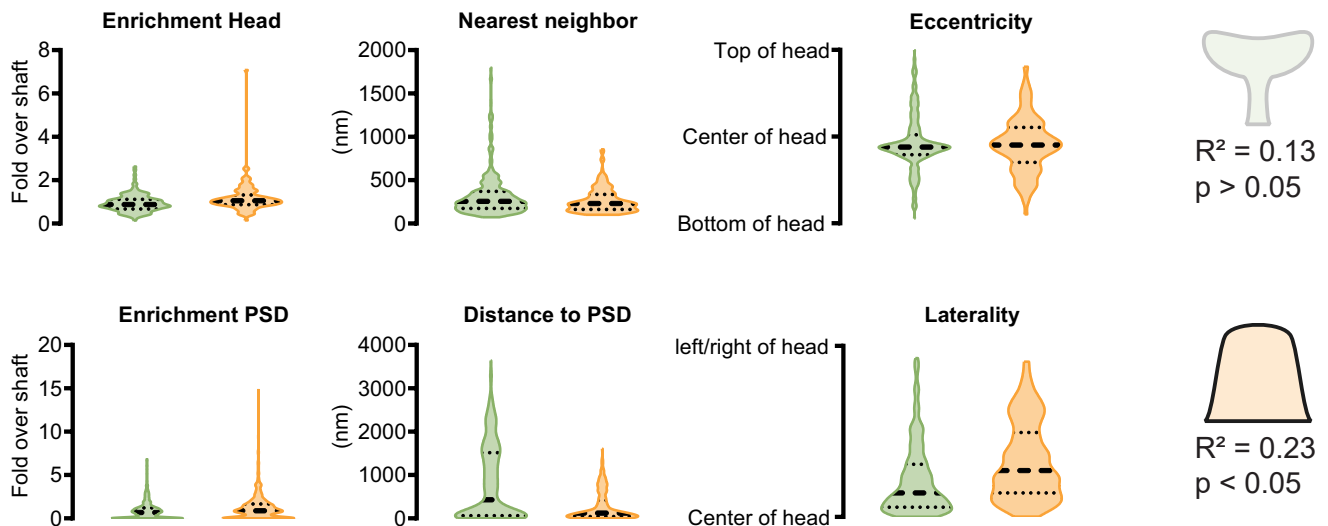

|          | Spine copy number | % of total protein | Molarity ( $\mu\text{M}$ ) | PSD copy number |
|----------|-------------------|--------------------|----------------------------|-----------------|
| Mushroom | $0.4 \pm 0.2$     | $0.0 \pm 0.0\%$    | $0.0 \pm 0.0$              | $0 \pm 0.0$     |
| Stubby   | $0.5 \pm 0.3$     | $0.0 \pm 0.0\%$    | $0.0 \pm 0.0$              | $0 \pm 0.0$     |

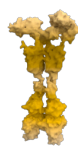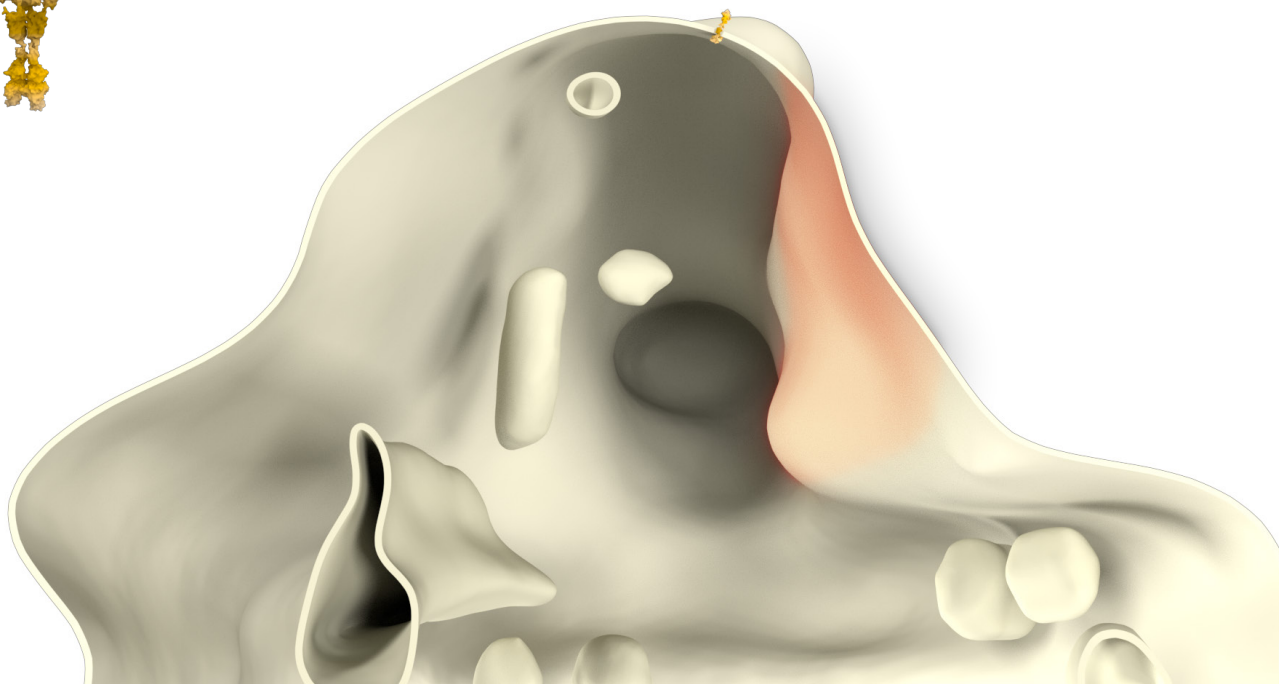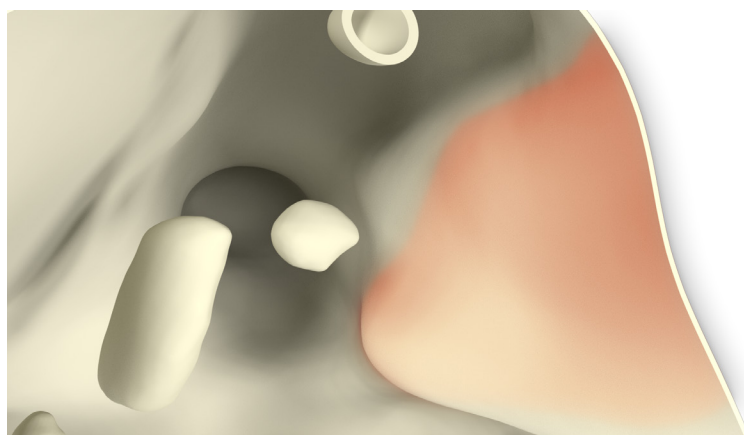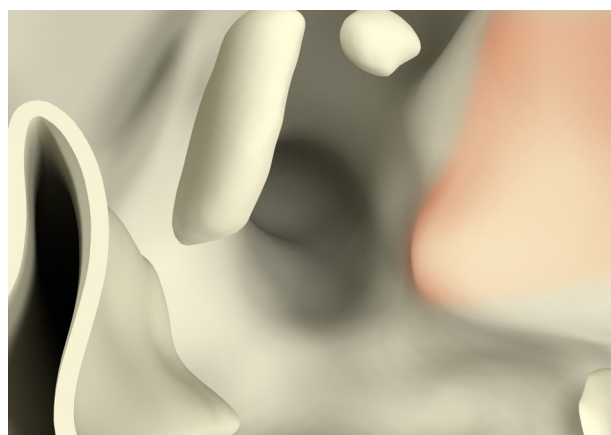

## References

**Antibody:** Abcam ab51314

**PDB Identifier:** 1ewk, 1ewt, 2e4u, 4or2, 3ks9

### Literature:

Feng et al., 2002, J. Biol. Chem.

Hu et al., 2010, Neuron

Kato et al., 2008, Neuron

Kitano et al., 2003, J. Biol. Chem.

Maejima et al., 2001, Neuron

Mansouri et al., 2015, Eur. J. Neurosci.

Pandya et al., 2016, Proteomics

Park et al., 2008, Neuron

Roche et al., 1999, J. Biol. Chem.

Skeberdis et al., 2001, Neuropharmacology

Techlovská et al., 2014, Neuropharmacology

Tu et al., 1998, Neuron

Xiao et al., 1998, Neuron

Yuan et al., 2003, Cell



mGluR2 (Gene: Grm2, Uniprot ID: P31421)

**Known function:** Inhibits PLC, Regulates intracellular calcium release

**Known organization:** Poorly understood

**Known Interactions:** G<sub>i</sub> coupled, GRIP

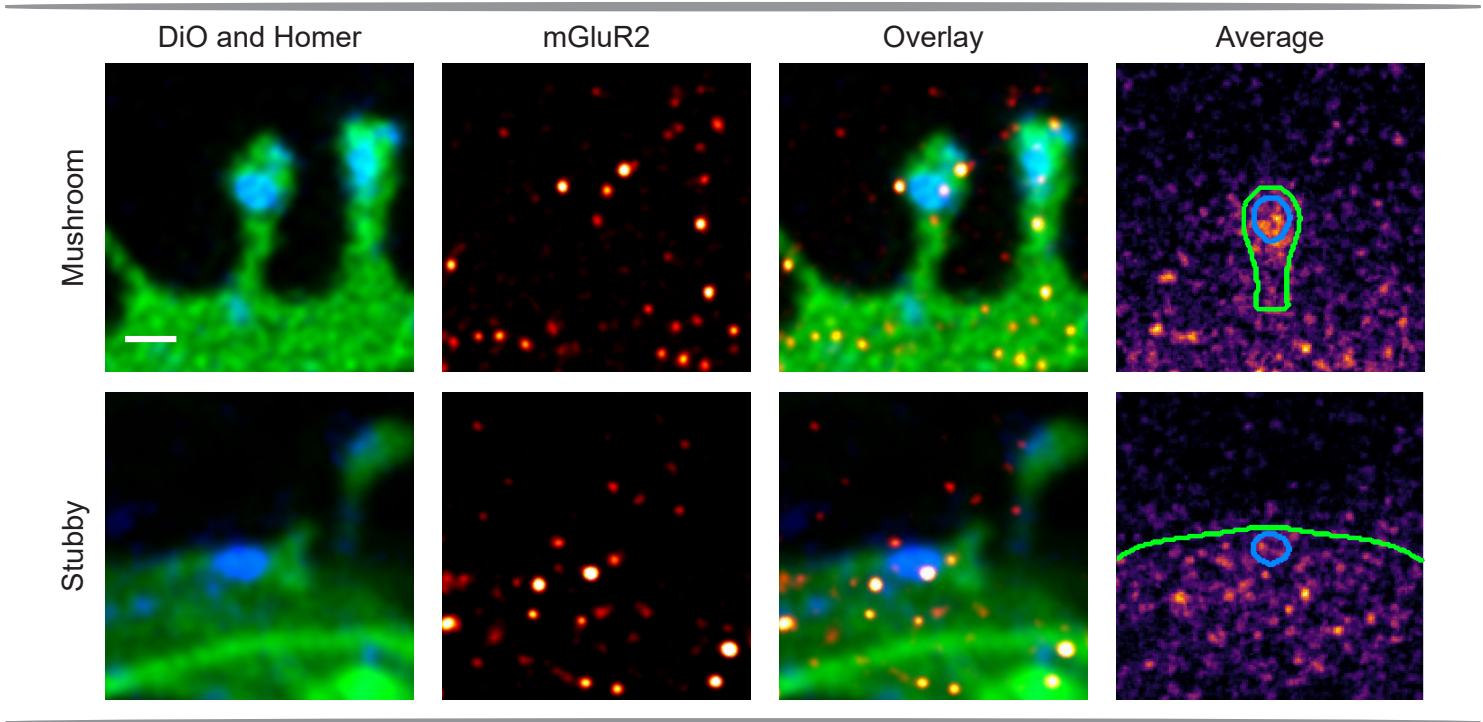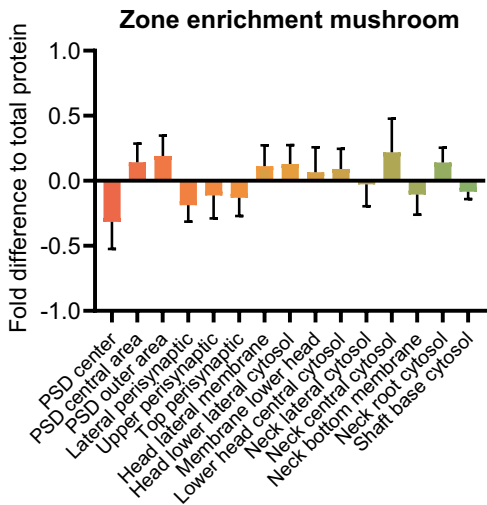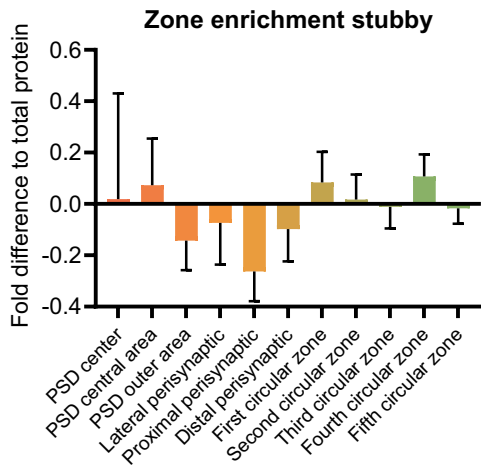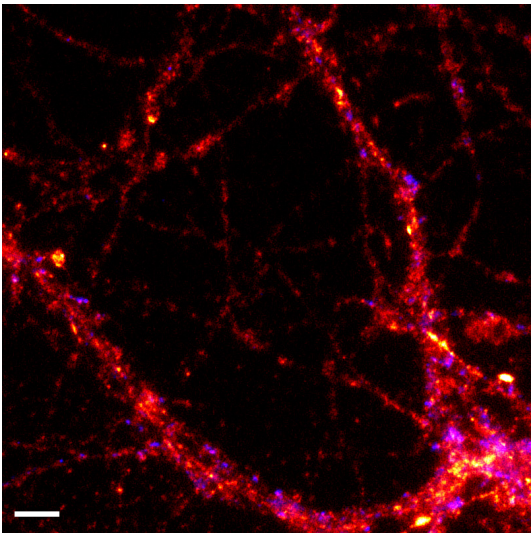

|                        |                                    |             |
|------------------------|------------------------------------|-------------|
| Whole cell copy number | 741301.6 ± 379907.8 (extrapolated) |             |
| Spine copy number      | 53.2 ± 16.6                        |             |
| Function               | Receptor                           |             |
|                        | Mushroom                           | Stubby      |
| Spine copy number      | 41.9 ± 13.1                        | 67.0 ± 20.9 |
| % of total protein     | 0.0 ± 0.0%                         | 0.0 ± 0.0%  |
| Molarity (μM)          | 0.5 ± 0.2                          | 0.6 ± 0.2   |
| PSD copy number        | 8 ± 2.5                            | 6 ± 1.9     |
| % in PSD               | 19.1 ± 5.9%                        | 9.0 ± 2.8%  |

|          | Spine copy number | % of total protein | Molarity ( $\mu\text{M}$ ) | PSD copy number |
|----------|-------------------|--------------------|----------------------------|-----------------|
| Mushroom | $41.9 \pm 13.1$   | $0.0 \pm 0.0\%$    | $0.5 \pm 0.2$              | $8 \pm 2.5$     |
| Stubby   | $67.0 \pm 20.9$   | $0.0 \pm 0.0\%$    | $0.6 \pm 0.2$              | $6 \pm 1.9$     |

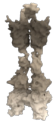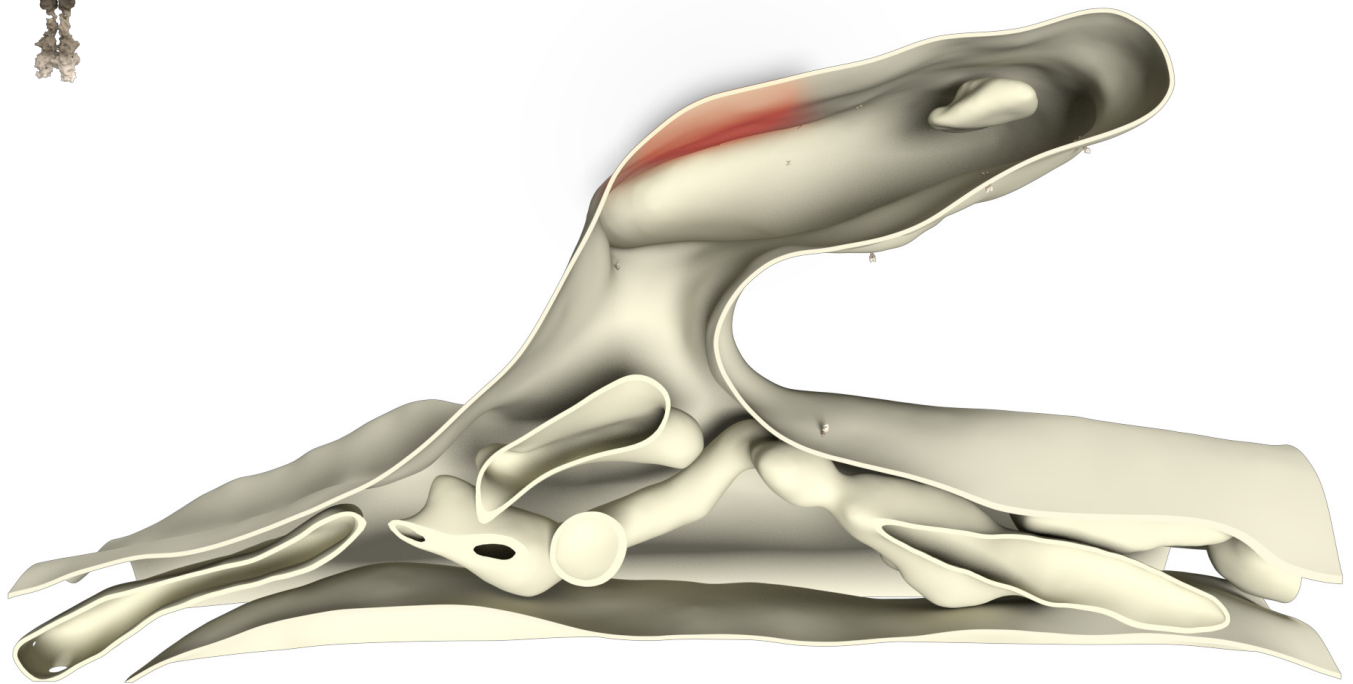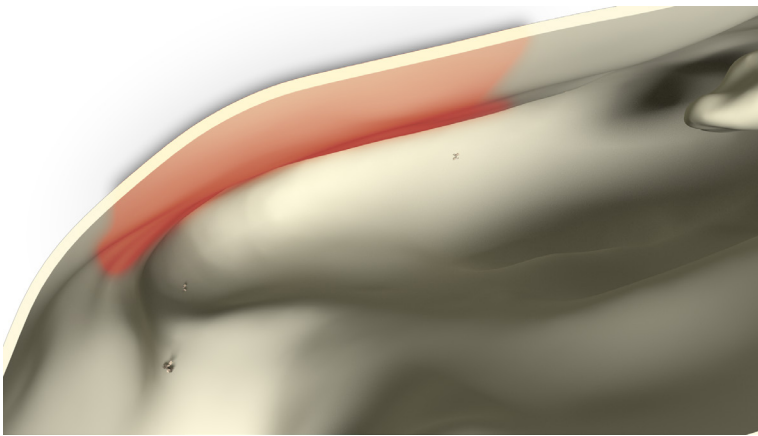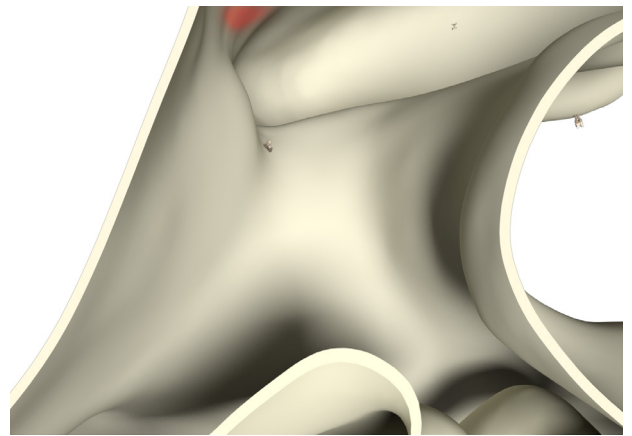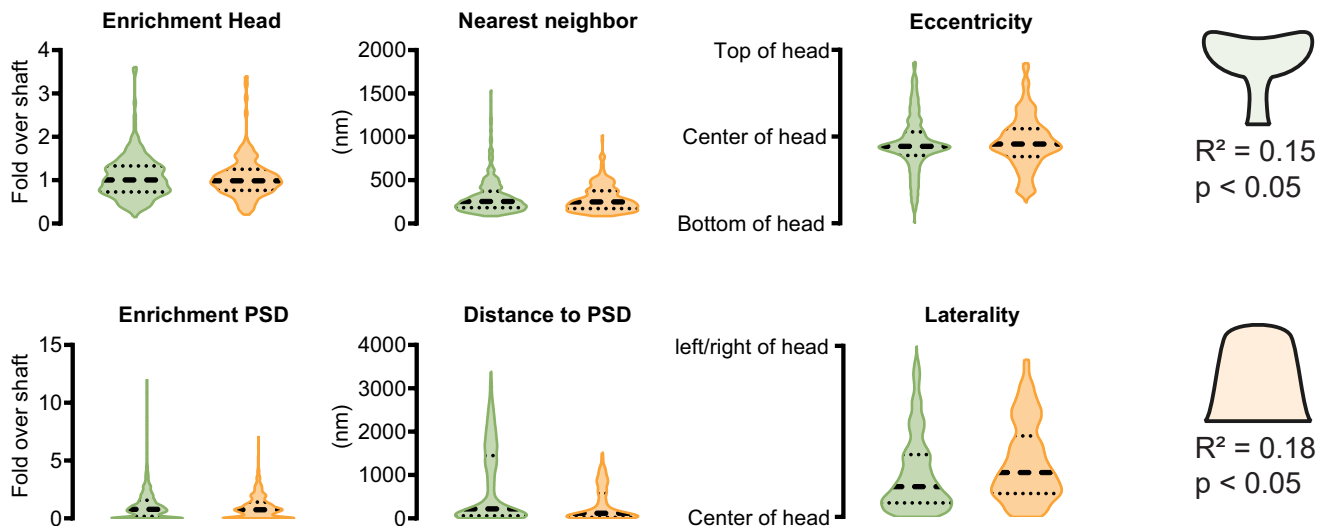

|          | Spine copy number | % of total protein | Molarity ( $\mu\text{M}$ ) | PSD copy number |
|----------|-------------------|--------------------|----------------------------|-----------------|
| Mushroom | $41.9 \pm 13.1$   | $0.0 \pm 0.0\%$    | $0.5 \pm 0.2$              | $8 \pm 2.5$     |
| Stubby   | $67.0 \pm 20.9$   | $0.0 \pm 0.0\%$    | $0.6 \pm 0.2$              | $6 \pm 1.9$     |

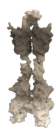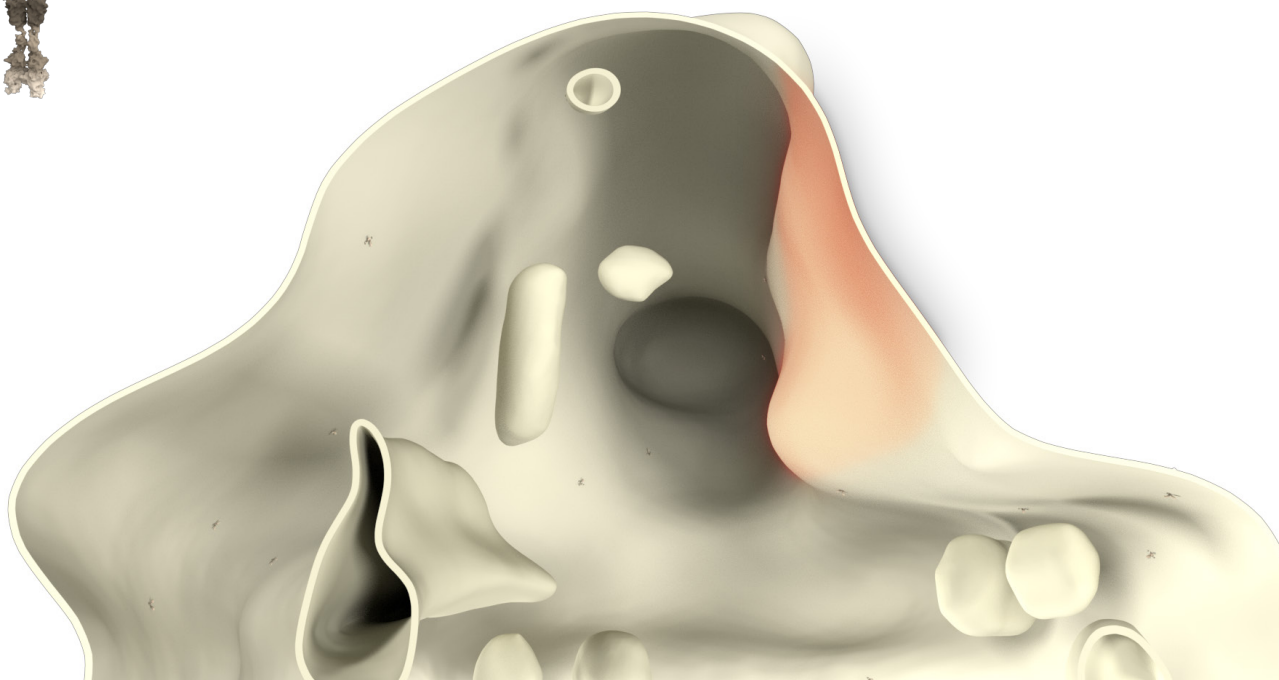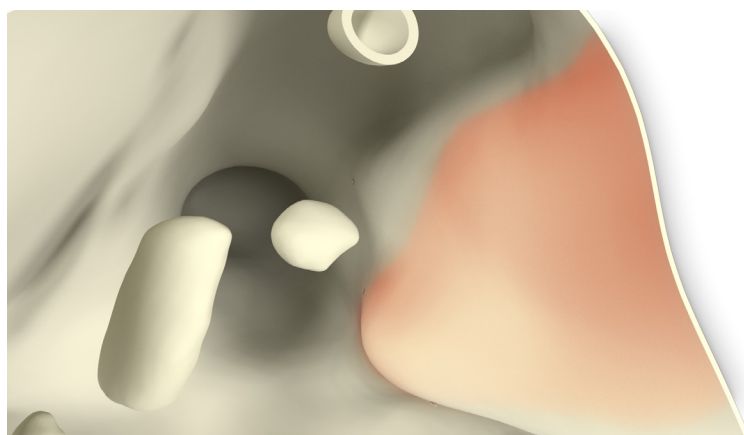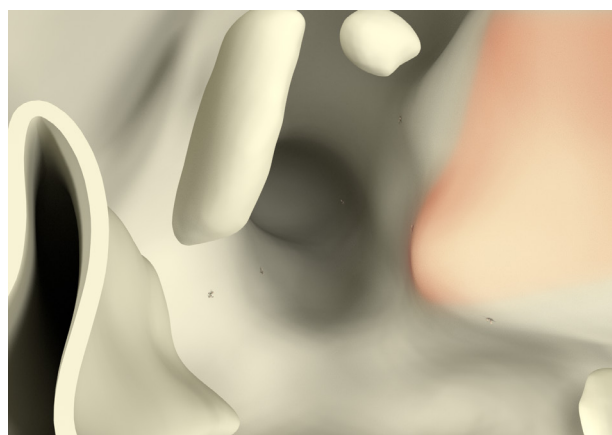

## References

**Antibody:** Abcam ab150387

**PDB Identifier:** modified mGluR1

### Literature:

Ambrosini et al., 1995, Mol. Pharmacol.

Cai et al., 2001, J Neurochem.

Hirbec et al., 2002, J. Biol. Chem.

Jin et al., 2017, Mol. Psychiatry.

Kato et al., 2008, Neuron

Roche et al., 1999, J. Biol. Chem.

Schaffhauser et al., 2000, J. Neurosci.

Tu et al., 1998, Neuron

Xiao et al., 1998, Neuron



## mGluR5 (Gene: Grm5, Uniprot ID: P31424)

**Known function:** Activates PKC and PLC, Regulates intracellular calcium release, Involved in LTP and homeostatic plasticity, Activates cannabinoid synthesis

**Known organization:** Transmembrane protein, Perisynaptic

**Known Interactions:** G<sub>q</sub> coupled, mGluR1, Homer proteins

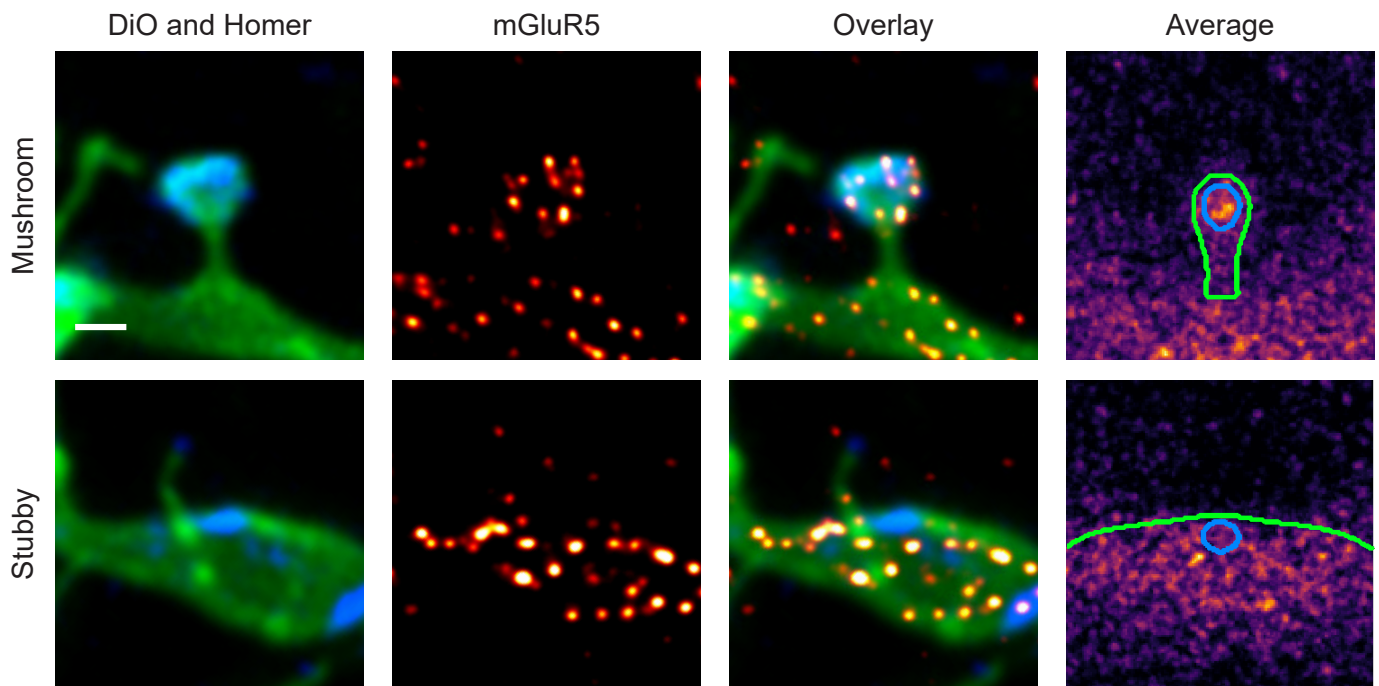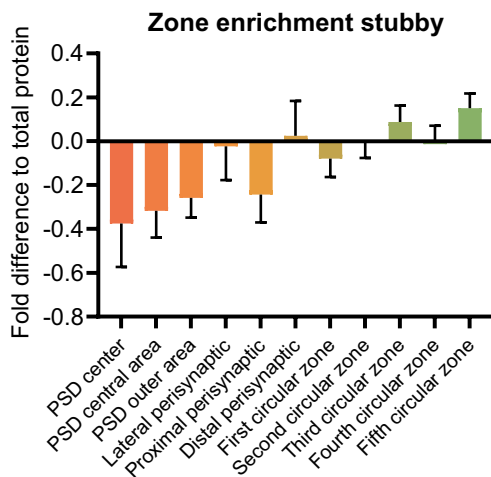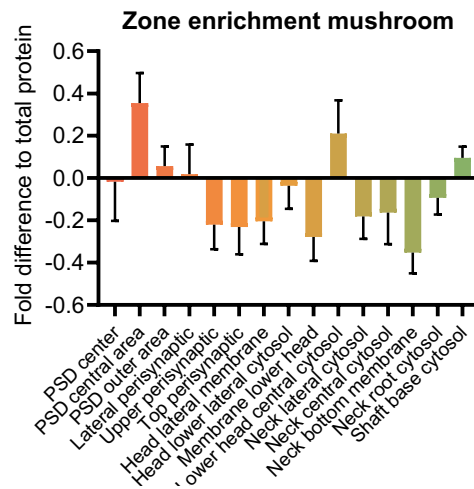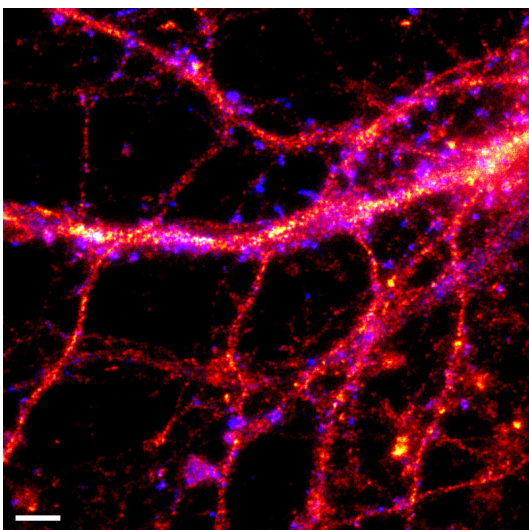

|                        |                                  |              |
|------------------------|----------------------------------|--------------|
| Whole cell copy number | 390630.7 ± 122503 (extrapolated) |              |
| Spine copy number      | 108.3 ± 26.7                     |              |
| Function               | Receptor                         |              |
|                        | Mushroom                         | Stubby       |
| Spine copy number      | 80.3 ± 19.8                      | 152.7 ± 37.7 |
| % of total protein     | 0.1 ± 0.0%                       | 0.1 ± 0.0%   |
| Molarity (μM)          | 1.0 ± 0.3                        | 1.4 ± 0.4    |
| PSD copy number        | 26 ± 6.4                         | 10 ± 2.5     |
| % in PSD               | 32.4 ± 8.0%                      | 6.6 ± 1.6%   |

|          | Spine copy number | % of total protein | Molarity ( $\mu\text{M}$ ) | PSD copy number |
|----------|-------------------|--------------------|----------------------------|-----------------|
| Mushroom | $80.3 \pm 19.8$   | $0.1 \pm 0.0\%$    | $1.0 \pm 0.3$              | $26 \pm 6.4$    |
| Stubby   | $152.7 \pm 37.7$  | $0.1 \pm 0.0\%$    | $1.4 \pm 0.4$              | $10 \pm 2.5$    |

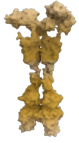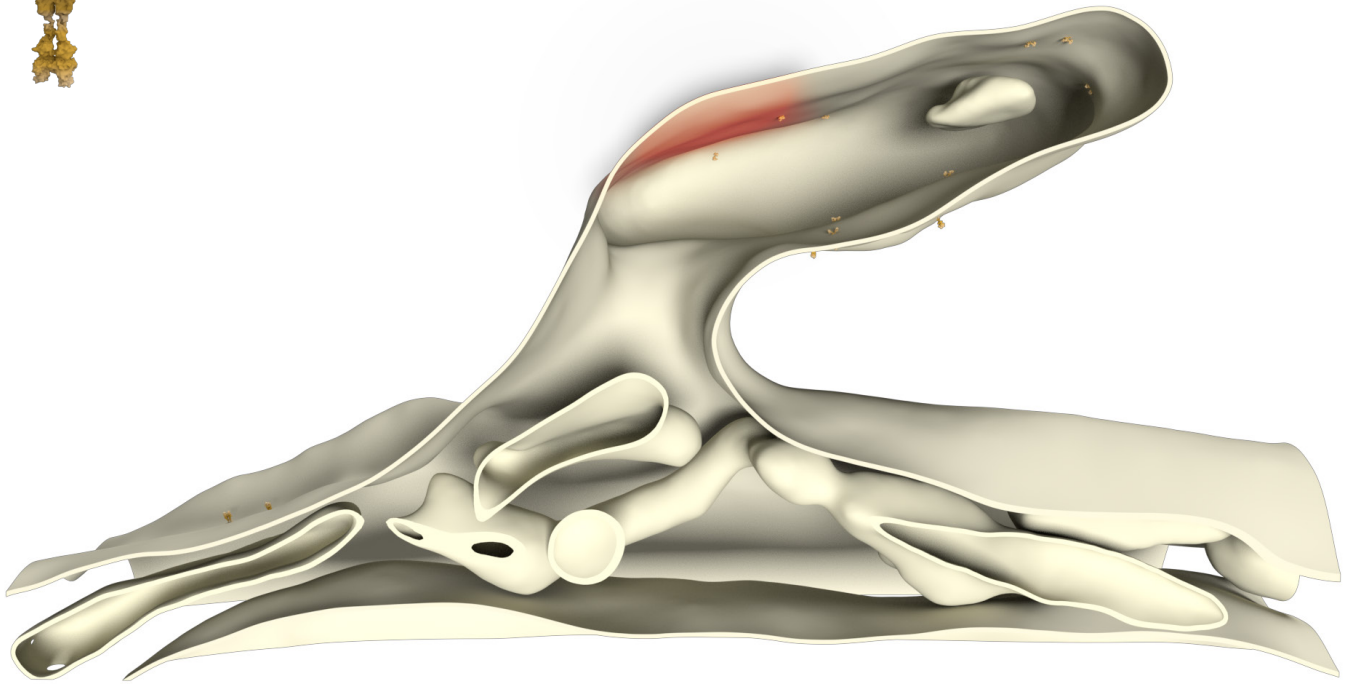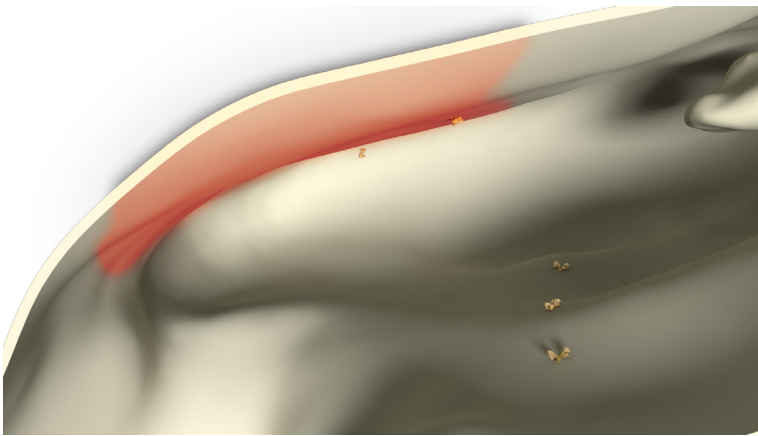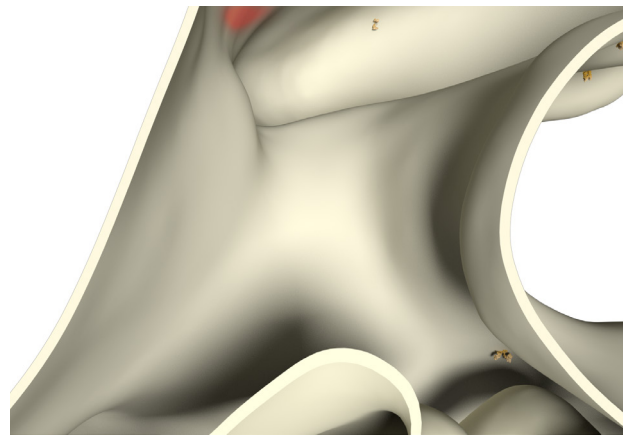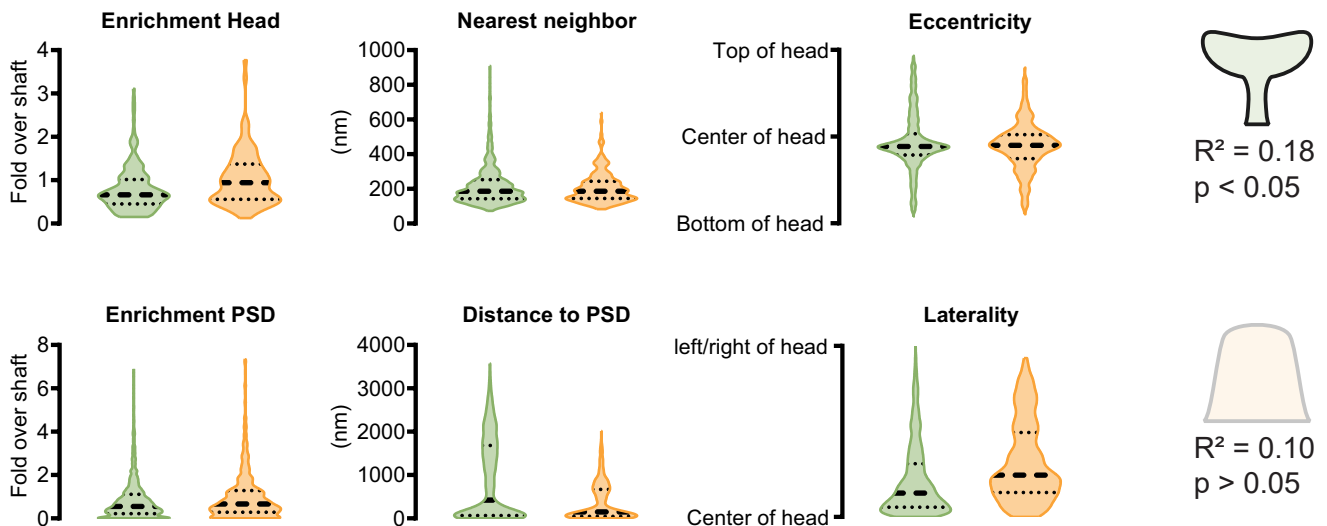

|          | Spine copy number | % of total protein | Molarity ( $\mu\text{M}$ ) | PSD copy number |
|----------|-------------------|--------------------|----------------------------|-----------------|
| Mushroom | $80.3 \pm 19.8$   | $0.1 \pm 0.0\%$    | $1.0 \pm 0.3$              | $26 \pm 6.4$    |
| Stubby   | $152.7 \pm 37.7$  | $0.1 \pm 0.0\%$    | $1.4 \pm 0.4$              | $10 \pm 2.5$    |

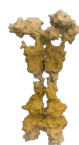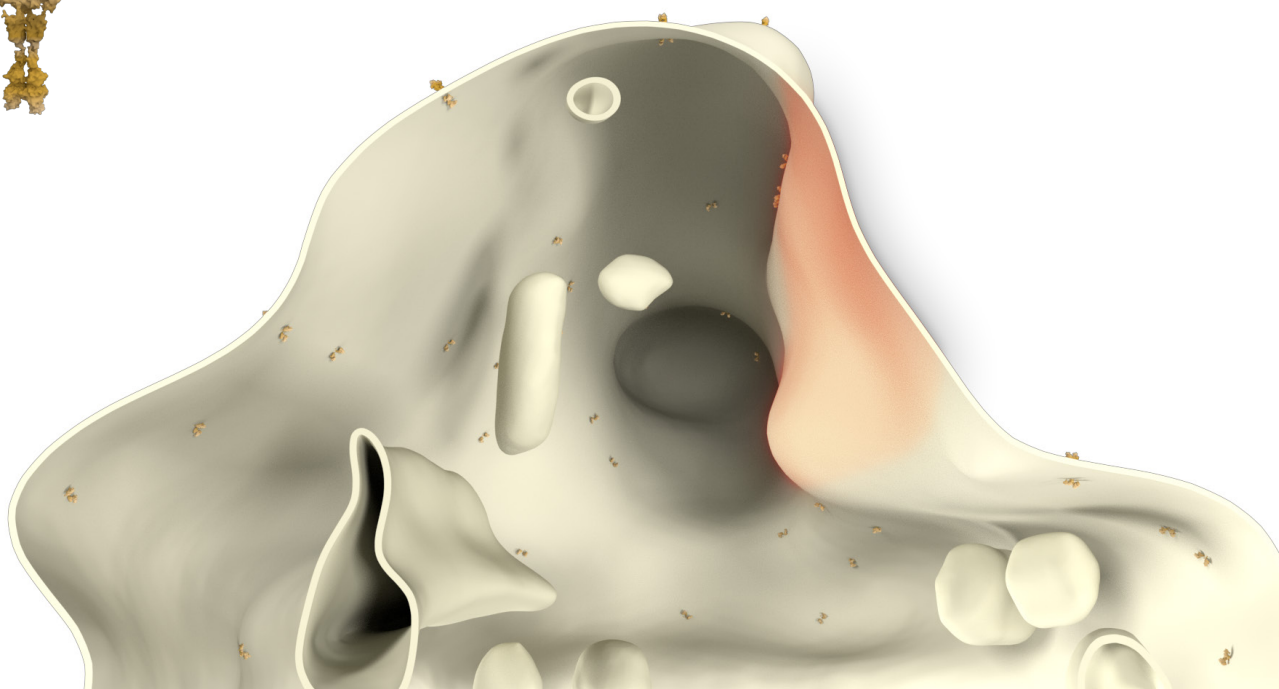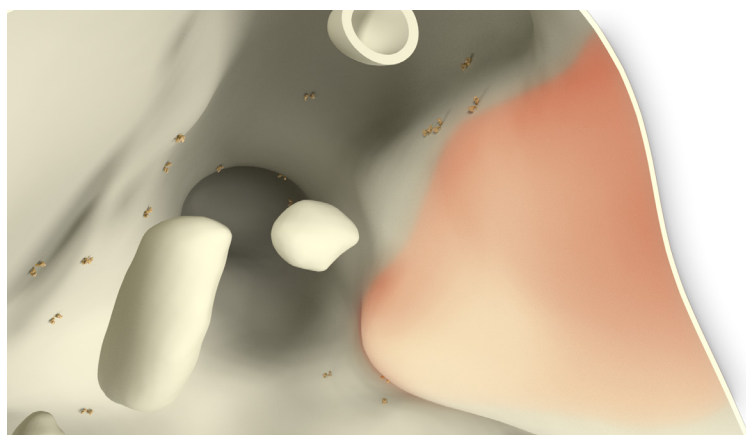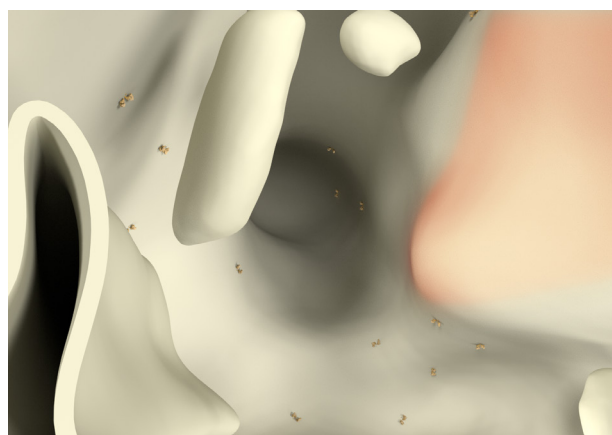

## References

**Antibody:** Abcam ab76316

**PDB Identifier:** 3lmk, 5cgd

### Literature:

Feng et al., 2002, J. Biol. Chem.

Hu et al., 2010, Neuron

Kitano et al., 2003, J. Biol. Chem.

Maejima et al., 2001, Neuron

Mansouri et al., 2015, Eur. J. Neurosci.

Pandya et al., 2016, Proteomics

Park et al., 2008, Neuron

Skeberdis et al., 2001, Neuropharmacology

Techlovská et al., 2014, Neuropharmacology

Roche et al., 1999, J. Biol. Chem.

Tu et al., 1998, Neuron

Pandya et al., 2016, Proteomics

Kato et al., 1998, J. Biol. Chem.

Xiao et al., 1998, Neuron

Yuan et al., 2003, Cell



**Myosin5a (Gene: Myo5a, Uniprot ID: Q9QYF3)**

**Known function:** Transport of GluR1 and GluR2 during LTP, Regulates ER localization, Transport of various other cargos

**Known organization:** Cytosolic

**Known Interactions:** Actin

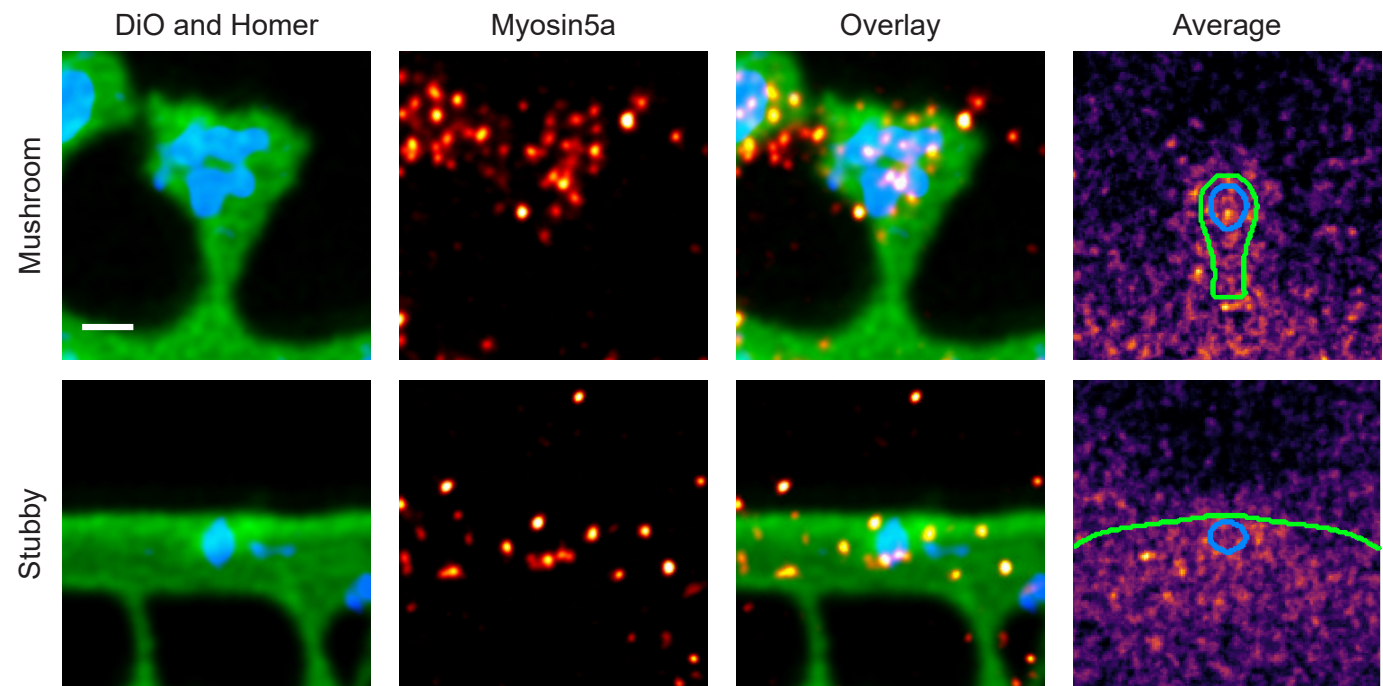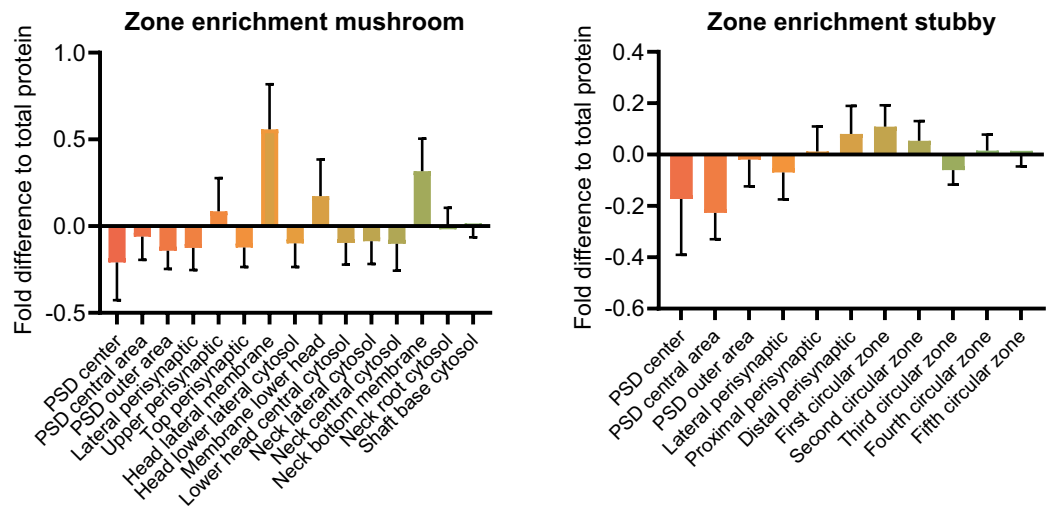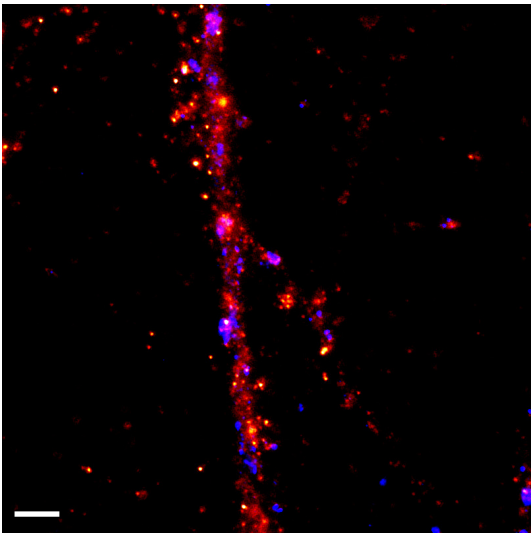

|                        |                                          |                 |
|------------------------|------------------------------------------|-----------------|
| Whole cell copy number | 150424230.8 ± 235143509.7 (extrapolated) |                 |
| Spine copy number      | 3802.9 ± 3100.7                          |                 |
| Function               | Receptor                                 |                 |
|                        | Mushroom                                 | Stubby          |
| Spine copy number      | 2986.8 ± 2435.3                          | 4938.1 ± 4026.3 |
| % of total protein     | 3.1 ± 2.5%                               | 4.4 ± 3.6%      |
| Molarity (µM)          | 37.9 ± 30.9                              | 46.7 ± 38.1     |
| PSD copy number        | 382 ± 311.5                              | 576 ± 469.6     |
| % in PSD               | 12.8 ± 10.4%                             | 11.7 ± 9.5%     |

|          | Spine copy number   | % of total protein | Molarity ( $\mu\text{M}$ ) | PSD copy number |
|----------|---------------------|--------------------|----------------------------|-----------------|
| Mushroom | $2986.8 \pm 2435.3$ | $3.1 \pm 2.5\%$    | $37.9 \pm 30.9$            | $382 \pm 311.5$ |
| Stubby   | $4938.1 \pm 4026.3$ | $4.4 \pm 3.6\%$    | $46.7 \pm 38.1$            | $576 \pm 469.6$ |

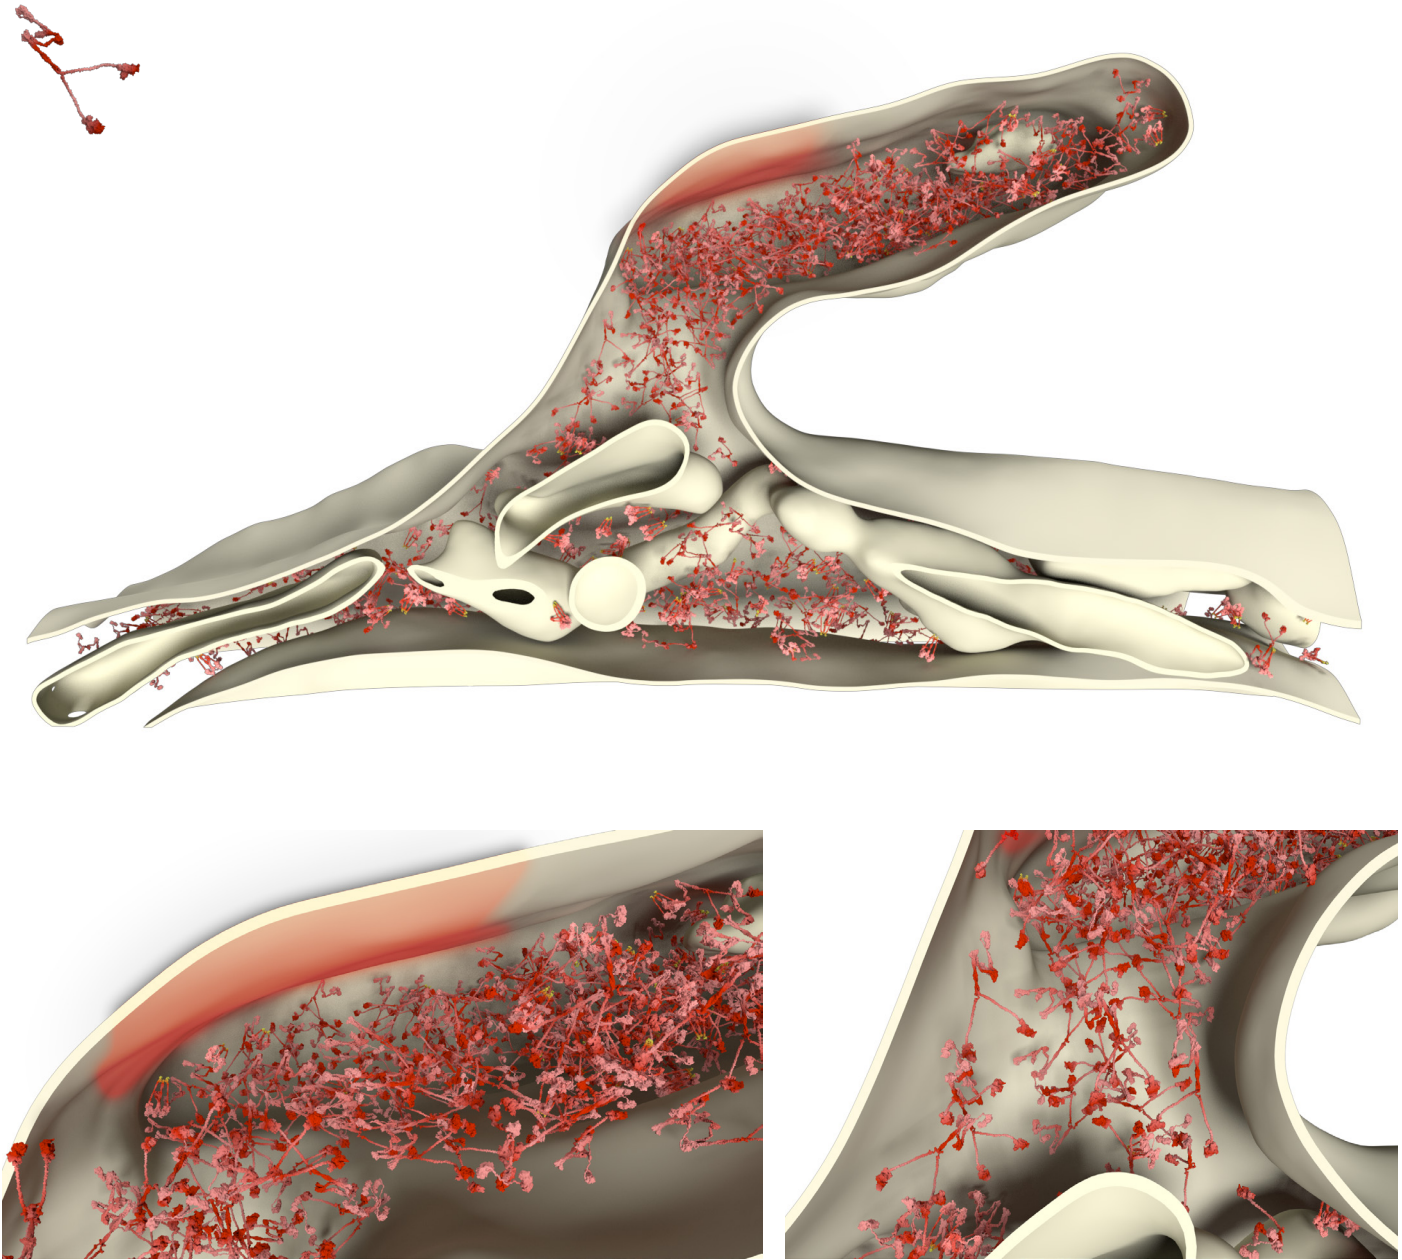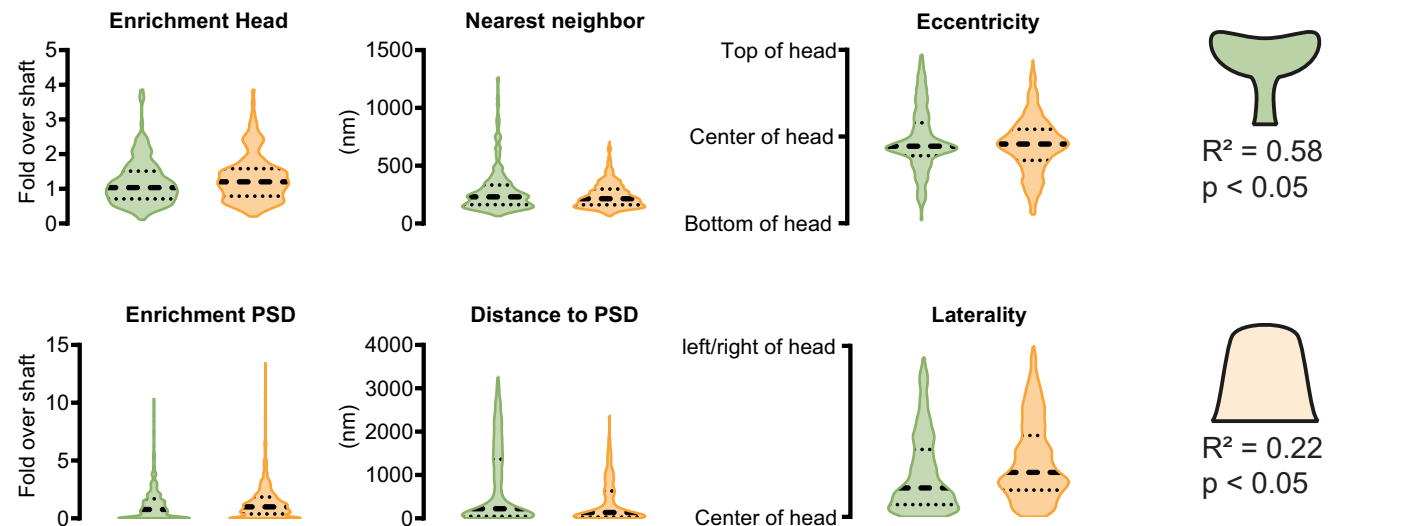



|          | Spine copy number   | % of total protein | Molarity ( $\mu\text{M}$ ) | PSD copy number |
|----------|---------------------|--------------------|----------------------------|-----------------|
| Mushroom | $2986.8 \pm 2435.3$ | $3.1 \pm 2.5\%$    | $37.9 \pm 30.9$            | $382 \pm 311.5$ |
| Stubby   | $4938.1 \pm 4026.3$ | $4.4 \pm 3.6\%$    | $46.7 \pm 38.1$            | $576 \pm 469.6$ |

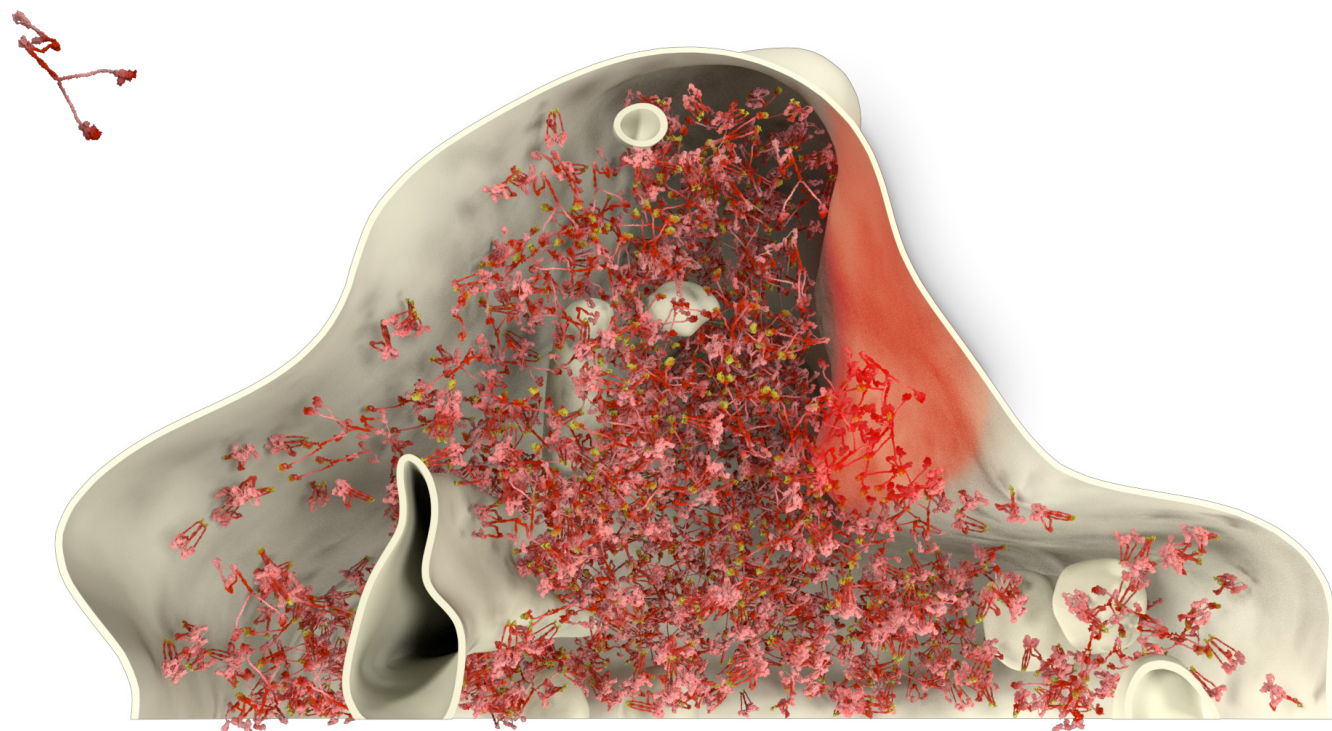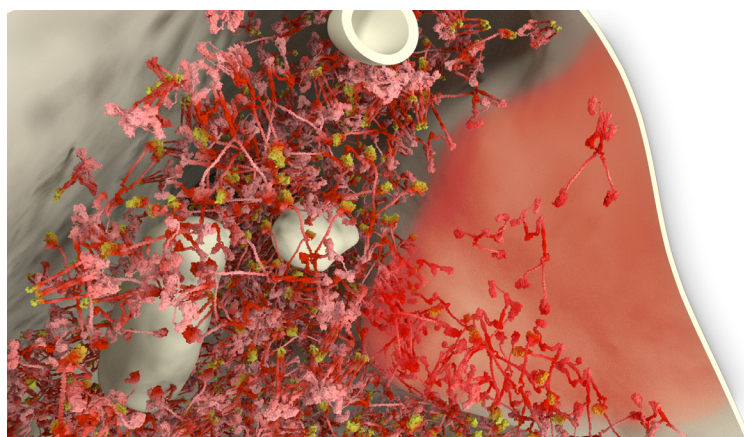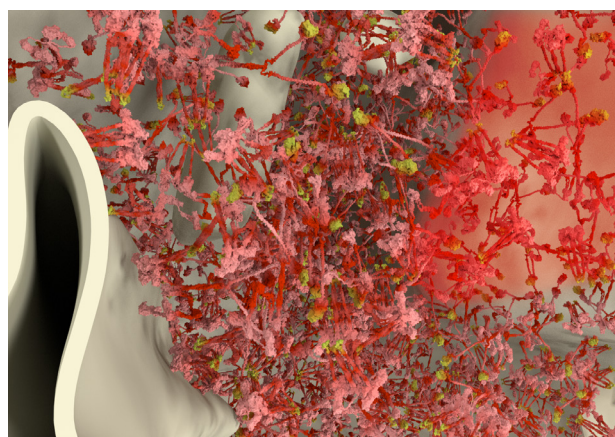

## References

**Antibody:** Sigma-Aldrich M5062

**PDB Identifier:** 2dfs

### Literature:

Correia et al., 2008, Nat. Neurosci.

Lisé et al., 2006, J. Biol. Chem.

Miyata et al., 2000, Neuron

Rudolf et al., 2011, J. Neurochem.



## Na $\beta$ 1 (Gene: Scnb1, Uniprot ID: Q00954)

**Known function:** Modulates sodium channel properties, Acts as adhesion molecule

**Known organization:** Transmembrane protein

**Known Interactions:** Na<sub>v</sub>1.1, Na<sub>v</sub>1.3

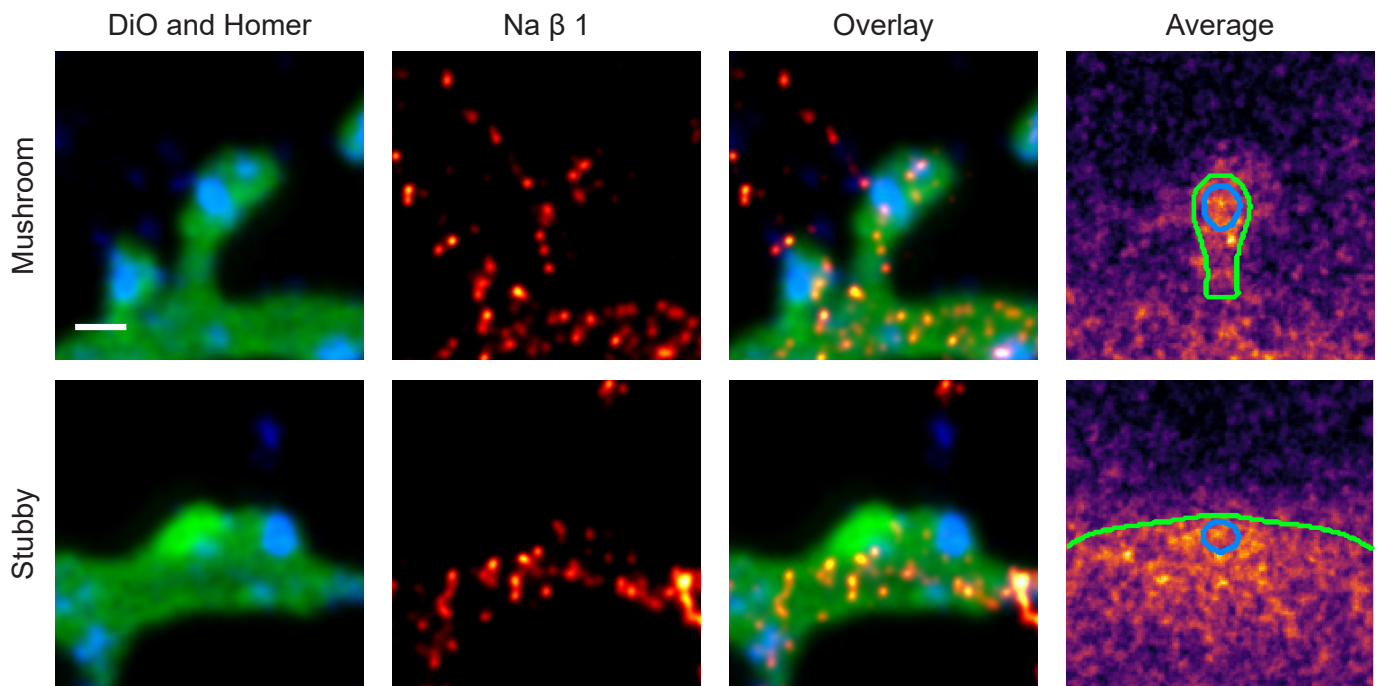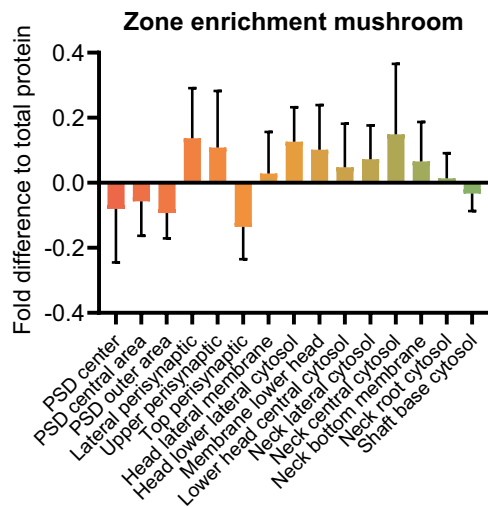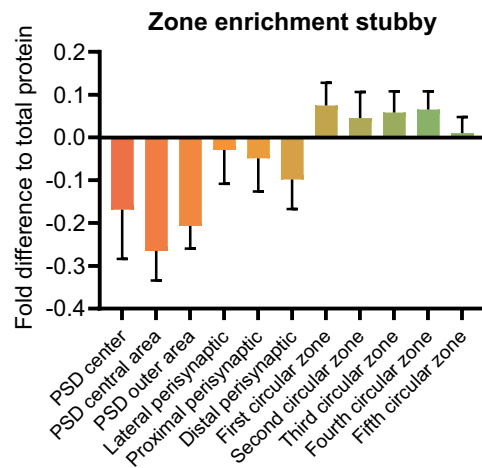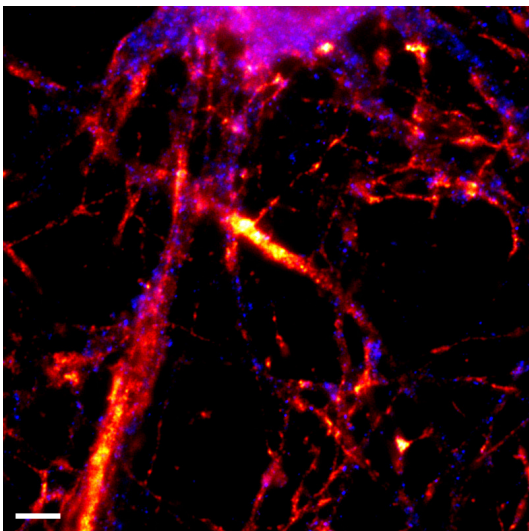

|                        |                         |                  |
|------------------------|-------------------------|------------------|
| Whole cell copy number | 714636.5 $\pm$ 139941.4 |                  |
| Spine copy number      | 285.4 $\pm$ 71.5        |                  |
| Function               | Ion channel             |                  |
|                        | Mushroom                | Stubby           |
| Spine copy number      | 243.6 $\pm$ 61.0        | 342.1 $\pm$ 85.7 |
| % of total protein     | 0.0 $\pm$ 0.0%          | 0.0 $\pm$ 0.0%   |
| Molarity ( $\mu$ M)    | 3.1 $\pm$ 0.8           | 3.2 $\pm$ 0.8    |
| PSD copy number        | 41 $\pm$ 10.3           | 33 $\pm$ 8.3     |
| % in PSD               | 16.8 $\pm$ 4.2%         | 9.6 $\pm$ 2.4%   |

|          | Spine copy number | % of total protein | Molarity ( $\mu\text{M}$ ) | PSD copy number |
|----------|-------------------|--------------------|----------------------------|-----------------|
| Mushroom | $243.6 \pm 61.0$  | $0.0 \pm 0.0\%$    | $3.1 \pm 0.8$              | $41 \pm 10.3$   |
| Stubby   | $342.1 \pm 85.7$  | $0.0 \pm 0.0\%$    | $3.2 \pm 0.8$              | $33 \pm 8.3$    |

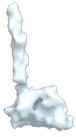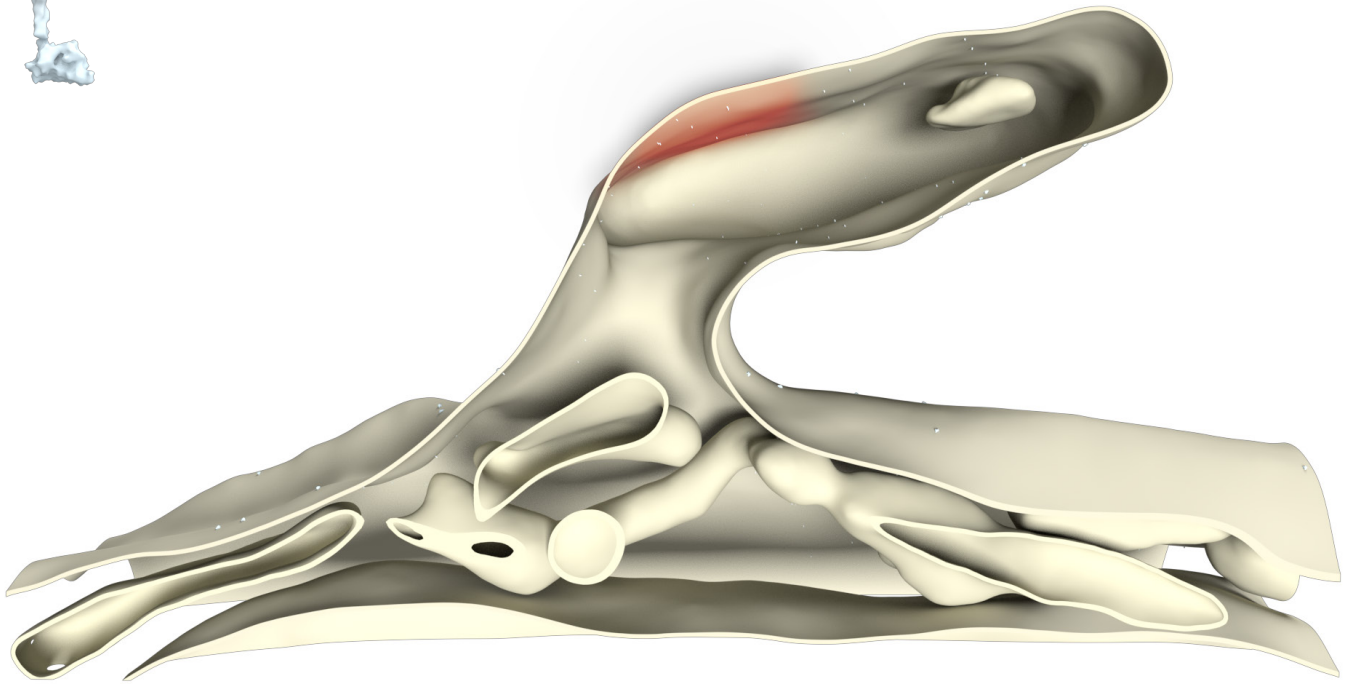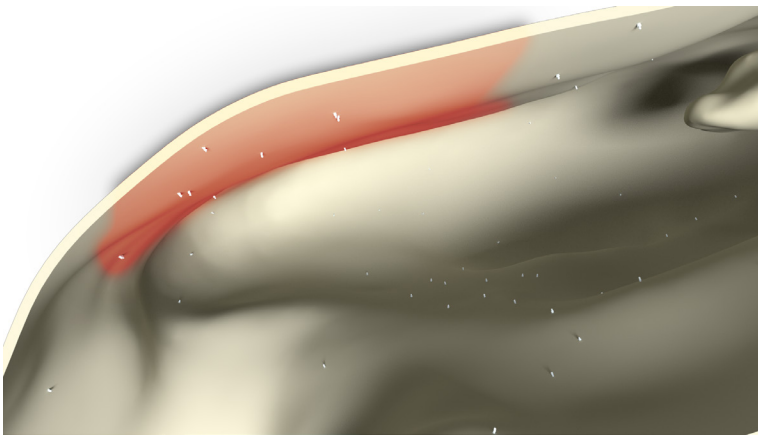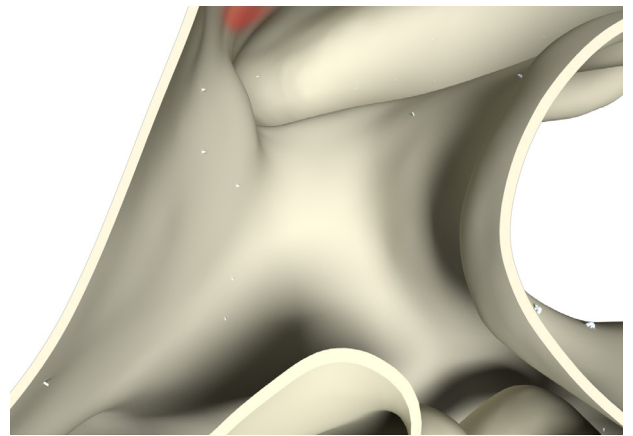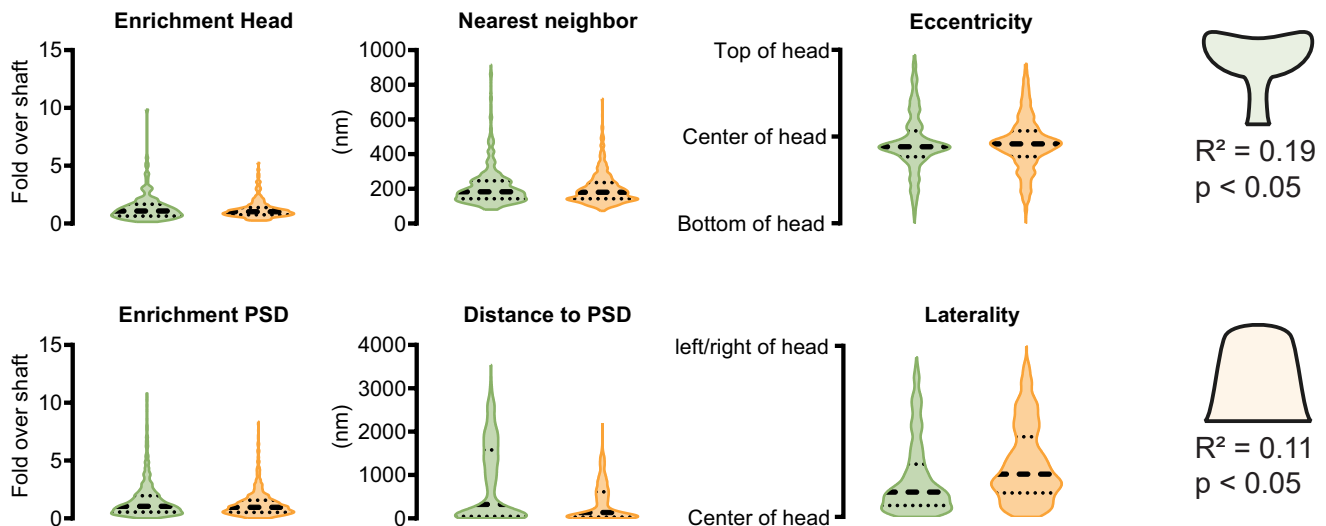

|          | Spine copy number | % of total protein | Molarity ( $\mu\text{M}$ ) | PSD copy number |
|----------|-------------------|--------------------|----------------------------|-----------------|
| Mushroom | $243.6 \pm 61.0$  | $0.0 \pm 0.0\%$    | $3.1 \pm 0.8$              | $41 \pm 10.3$   |
| Stubby   | $342.1 \pm 85.7$  | $0.0 \pm 0.0\%$    | $3.2 \pm 0.8$              | $33 \pm 8.3$    |

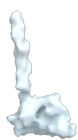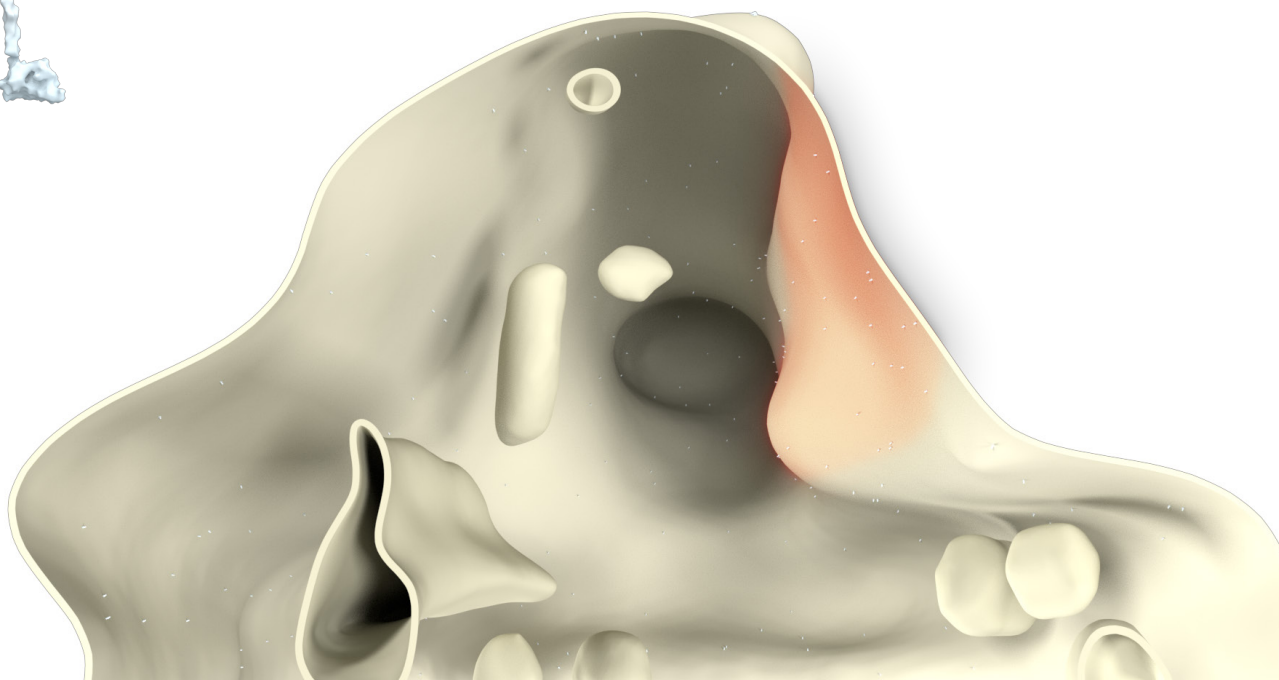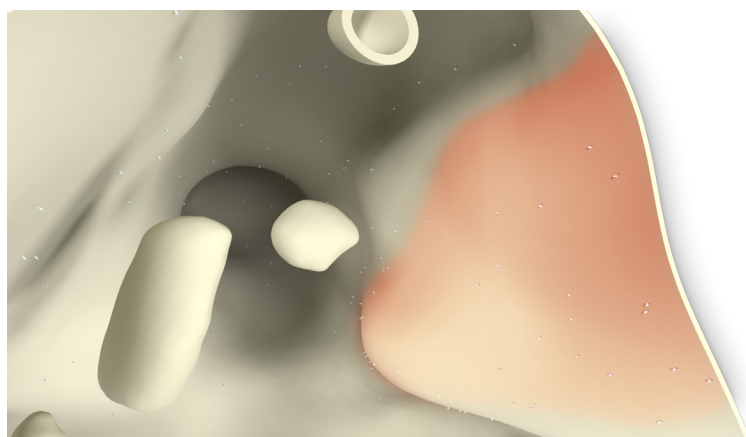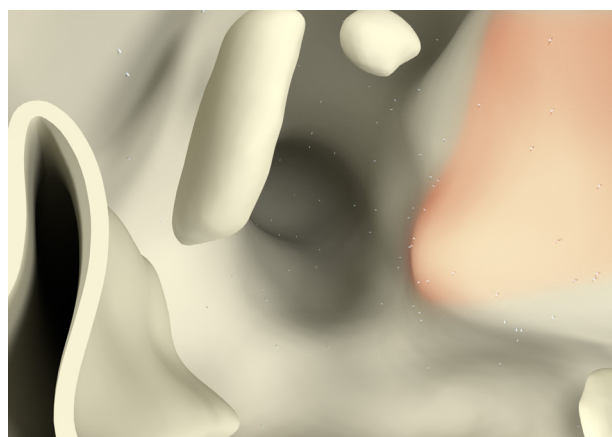

## References

**Antibody:** Alomone labs ASC-041

**PDB Identifier:** 6agf

### Literature:

Kazarinova-Noyes et al., 2001, J. Neurosci.

Malhotra et al., 2000, J. Biol. Chem.



Na<sup>+</sup>/K<sup>+</sup> ATPase (Gene: Atp1a3, Uniprot ID: P06687)

**Known function:** Maintains resting potential  
**Known organization:** Transmembrane protein, Forms clusters  
**Known Interactions:** None

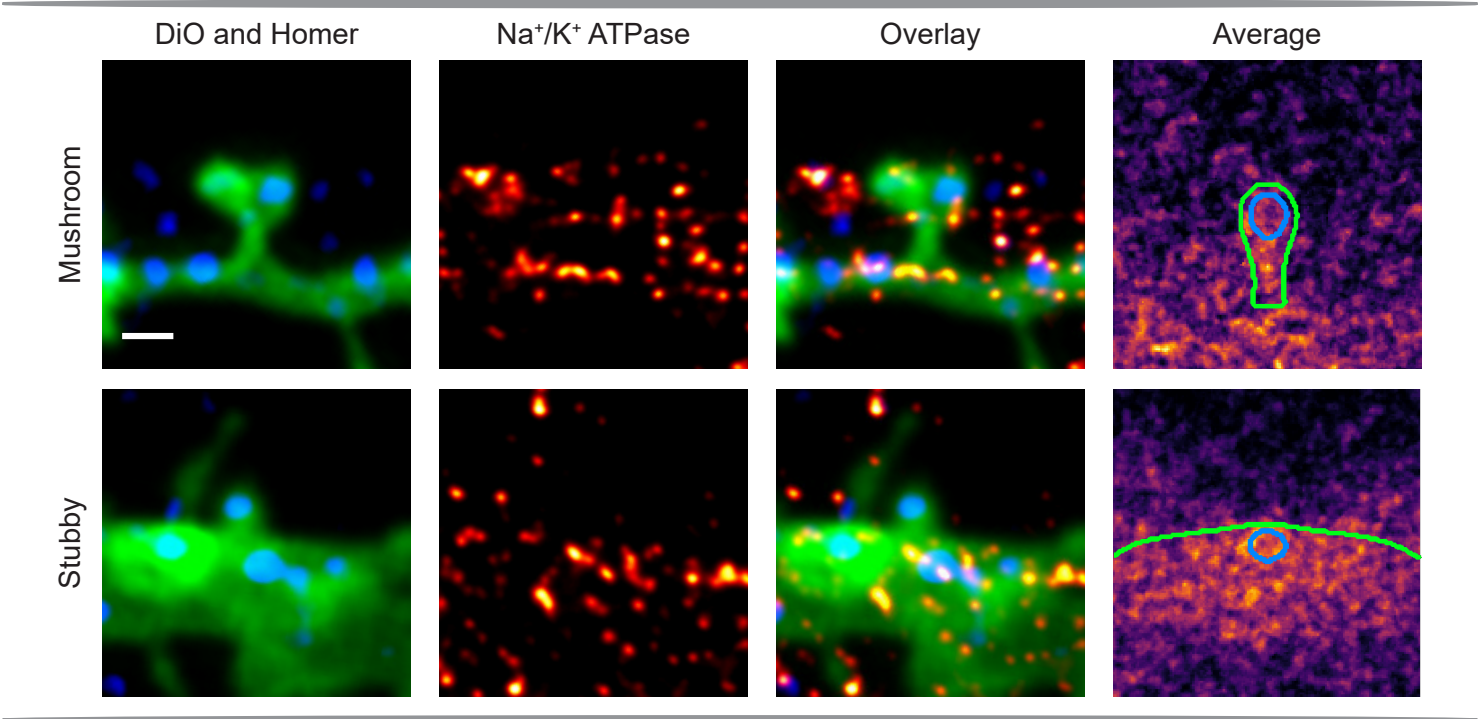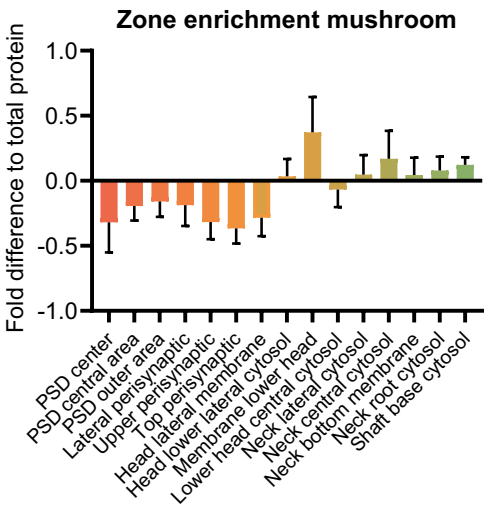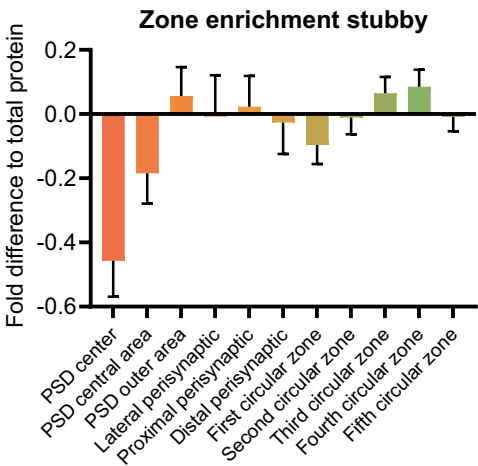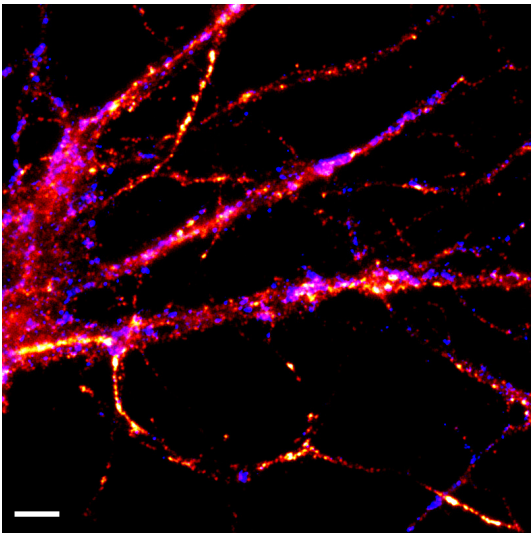

|                        |                        |                 |
|------------------------|------------------------|-----------------|
| Whole cell copy number | 29929991.7 ± 1624205.1 |                 |
| Spine copy number      | 6166.8 ± 1477.8        |                 |
| Function               | Ion channel            |                 |
|                        | Mushroom               | Stubby          |
| Spine copy number      | 4473.8 ± 1072.1        | 8111.4 ± 1943.8 |
| % of total protein     | 2.4 ± 0.6%             | 3.8 ± 0.9%      |
| Molarity (μM)          | 56.8 ± 13.6            | 76.7 ± 18.4     |
| PSD copy number        | 720 ± 172.5            | 1705 ± 408.6    |
| % in PSD               | 16.1 ± 3.9%            | 21.0 ± 5.0%     |

|          | Spine copy number   | % of total protein | Molarity ( $\mu\text{M}$ ) | PSD copy number  |
|----------|---------------------|--------------------|----------------------------|------------------|
| Mushroom | $4473.8 \pm 1072.1$ | $2.4 \pm 0.6\%$    | $56.8 \pm 13.6$            | $720 \pm 172.5$  |
| Stubby   | $8111.4 \pm 1943.8$ | $3.8 \pm 0.9\%$    | $76.7 \pm 18.4$            | $1705 \pm 408.6$ |

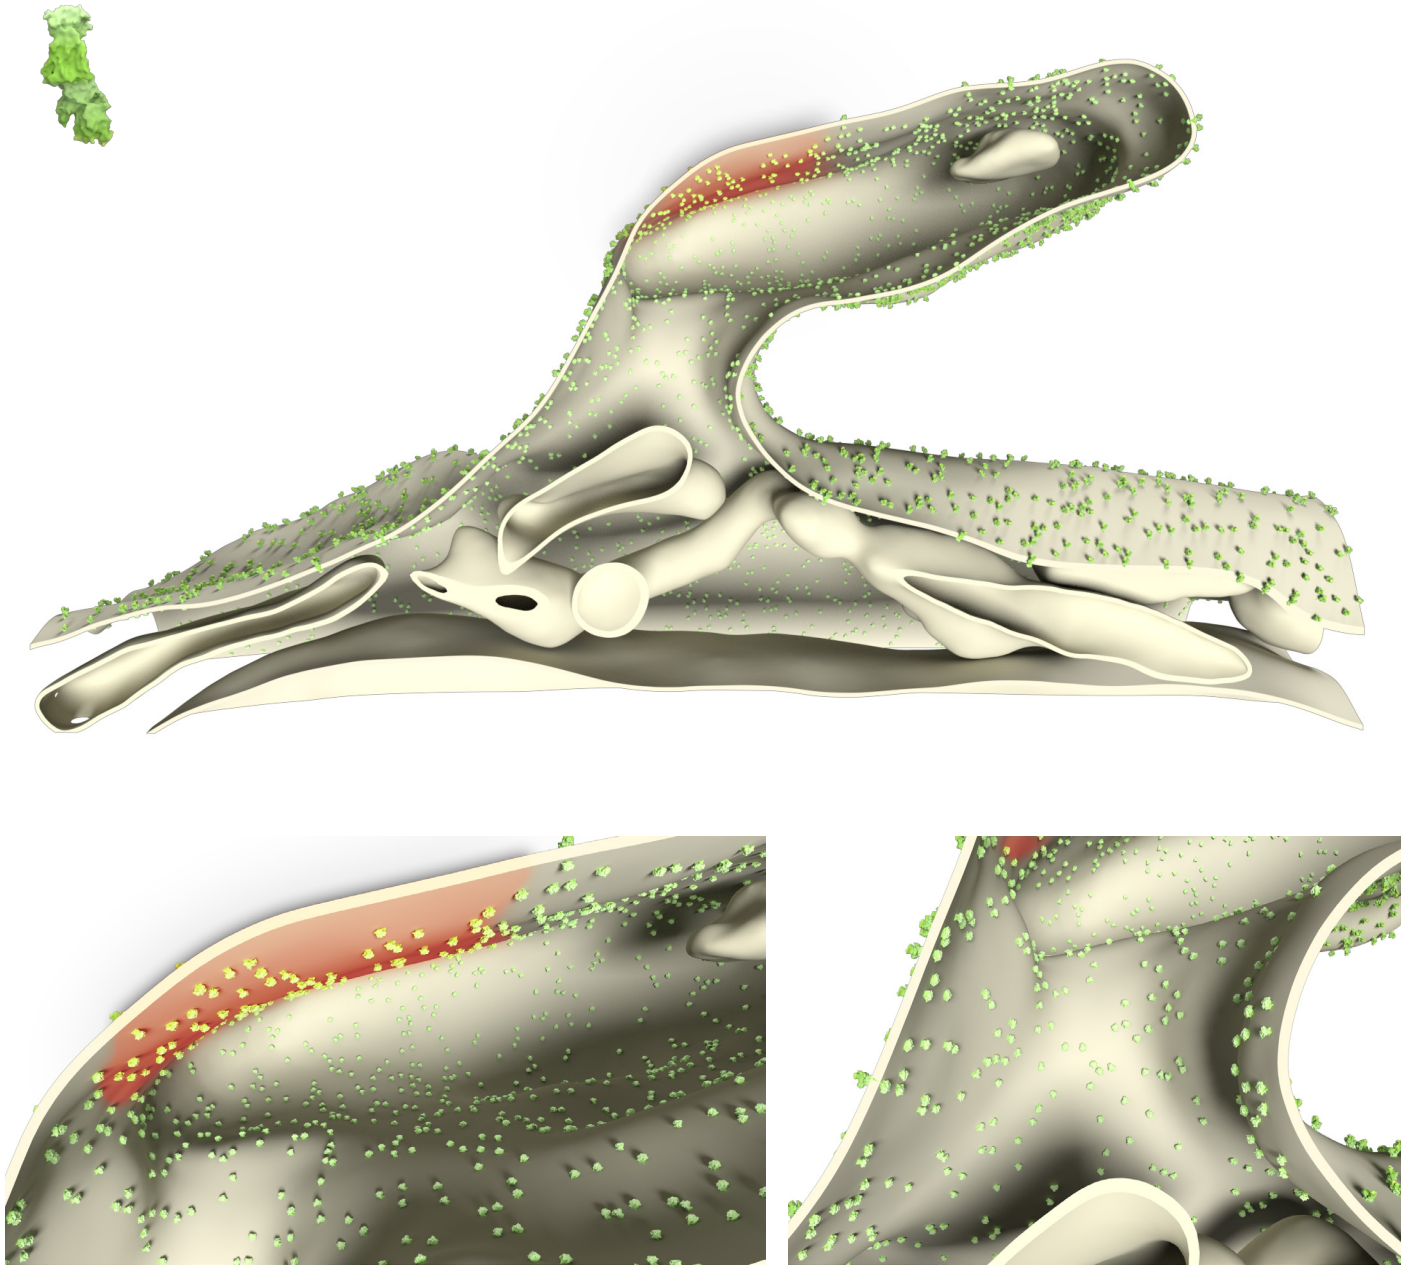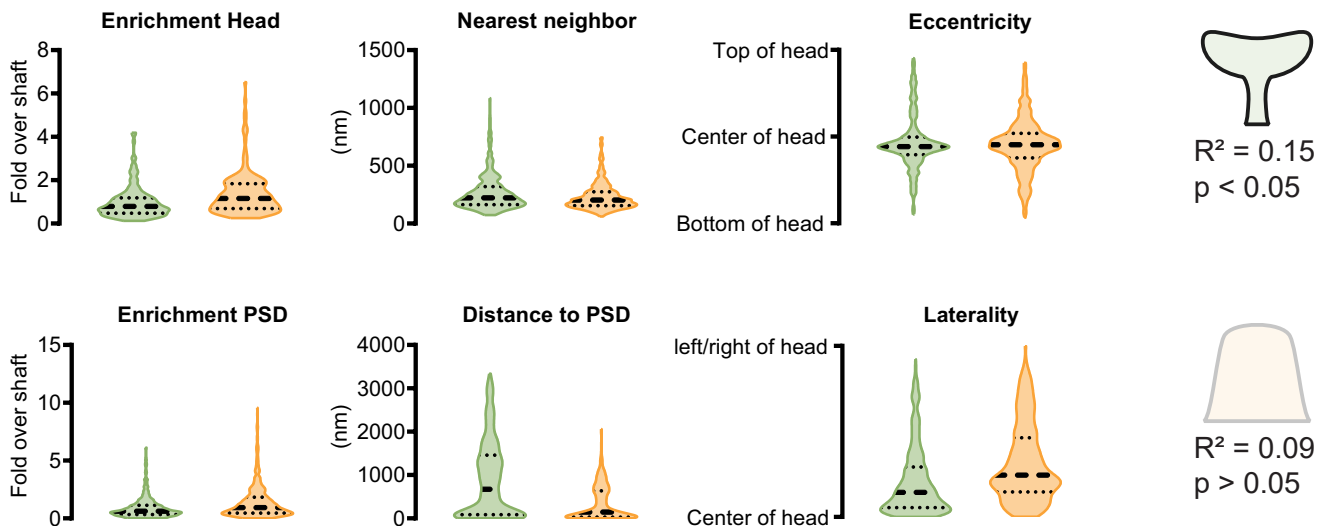



|          | Spine copy number   | % of total protein | Molarity ( $\mu\text{M}$ ) | PSD copy number  |
|----------|---------------------|--------------------|----------------------------|------------------|
| Mushroom | $4473.8 \pm 1072.1$ | $2.4 \pm 0.6\%$    | $56.8 \pm 13.6$            | $720 \pm 172.5$  |
| Stubby   | $8111.4 \pm 1943.8$ | $3.8 \pm 0.9\%$    | $76.7 \pm 18.4$            | $1705 \pm 408.6$ |

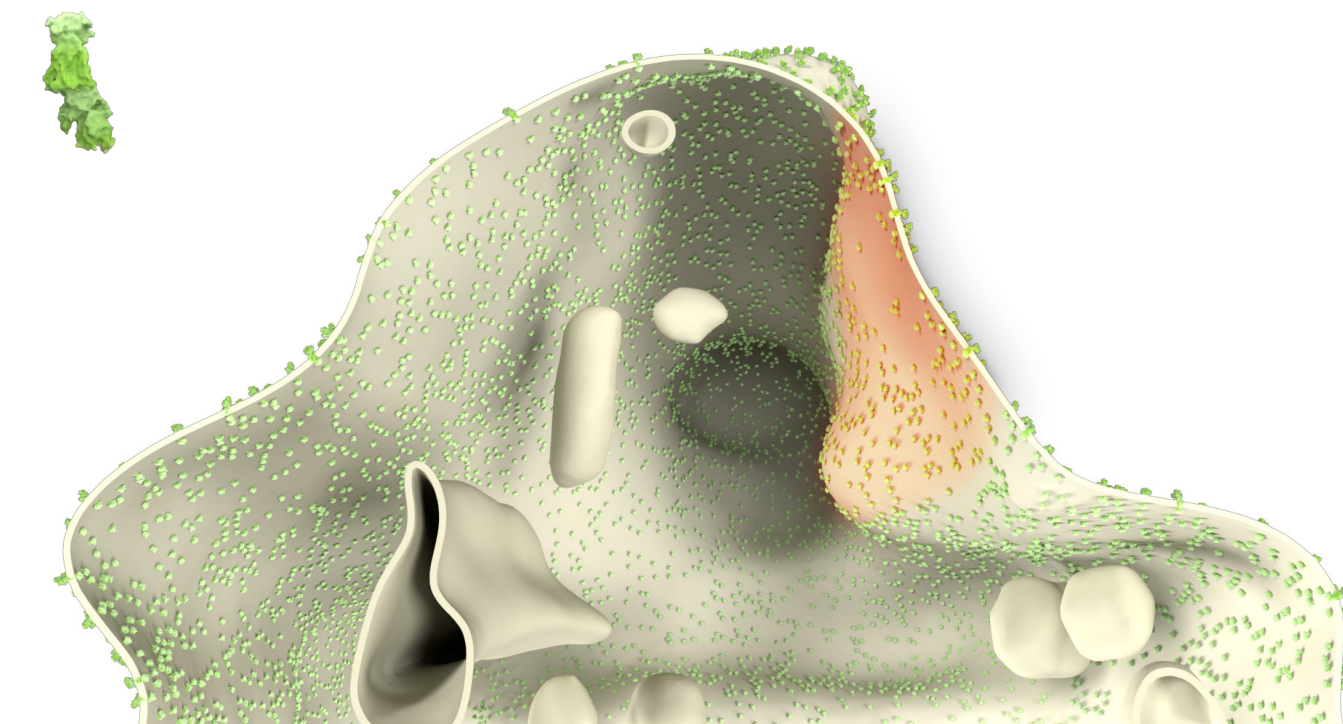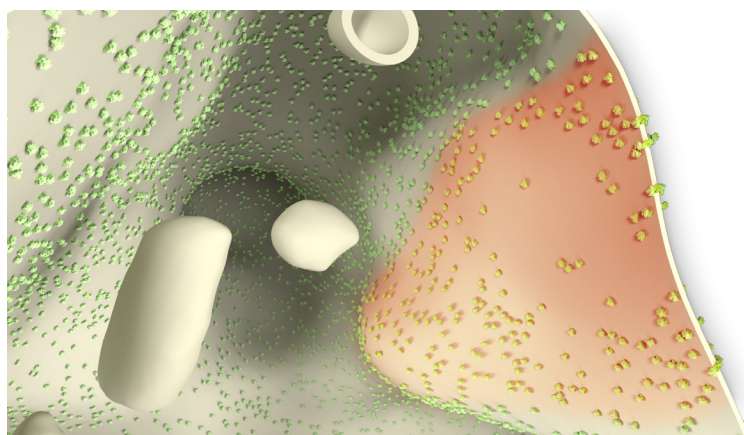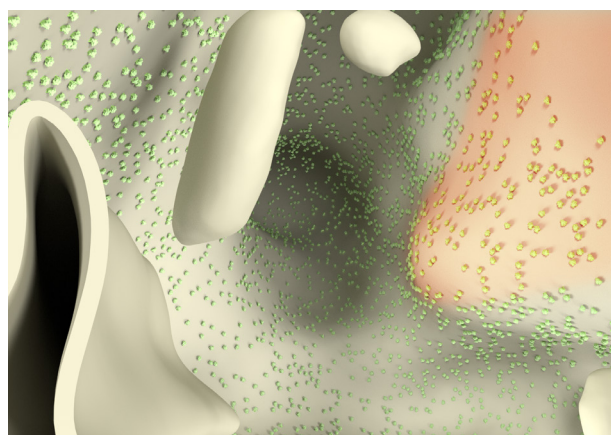

## References

**Antibody:** Thermo Scientific MA3-915

**PDB Identifier:** 4xe5

### Literature:

Blom et al., 2011, BMC Neurosci.

Blom et al., 2012, Microsc. Res. Tech.

Blom et al., 2016, Neurophotonics

Skou, 1957, Biochim. Biophys. Acta.



## Na<sub>v</sub>1.1 (Gene: Scn1a, Uniprot ID: P04774)

**Known function:** Sodium channel

**Known organization:** Transmembrane protein

**Known Interactions:** Na β 1

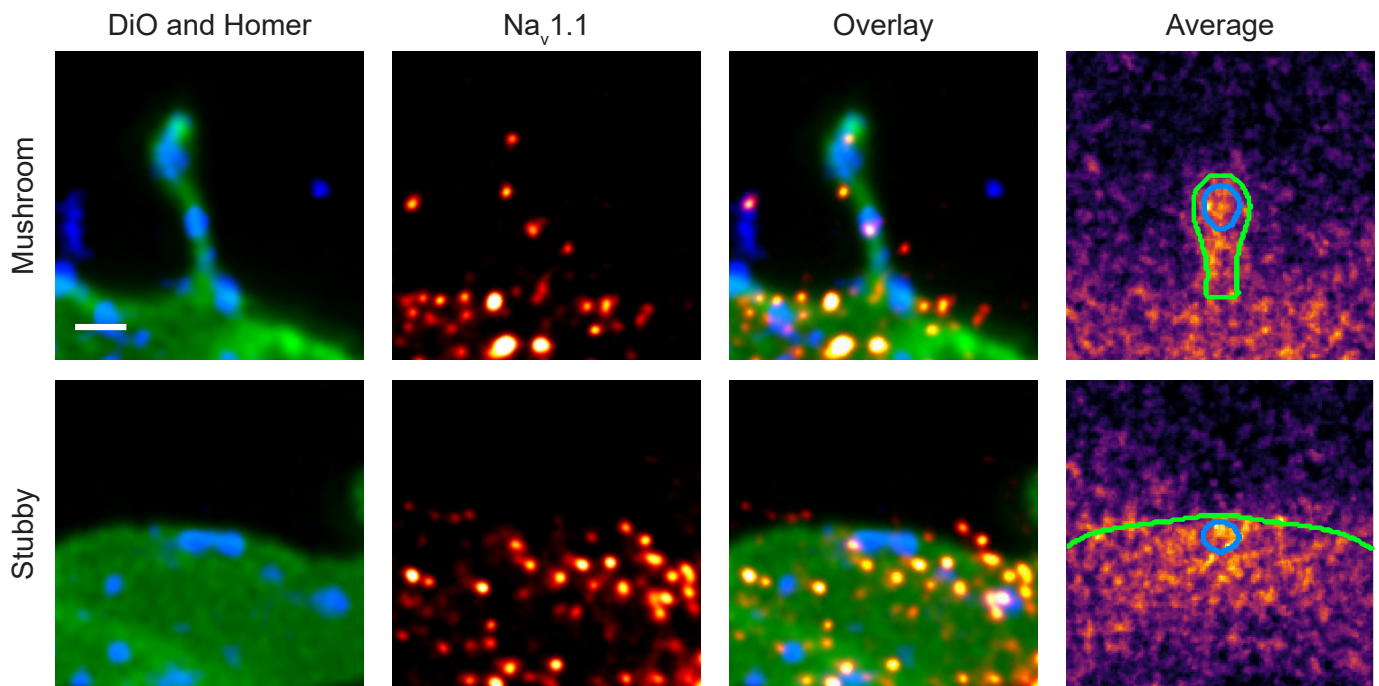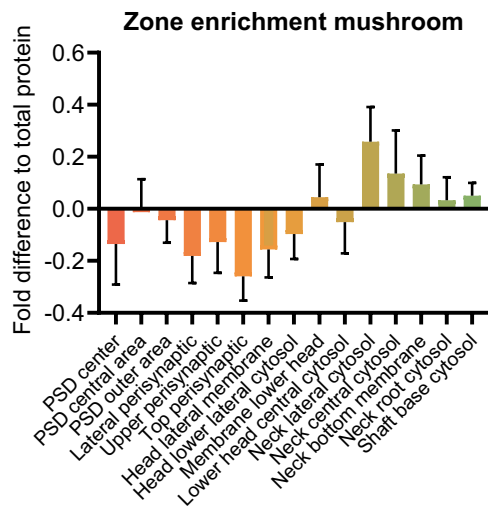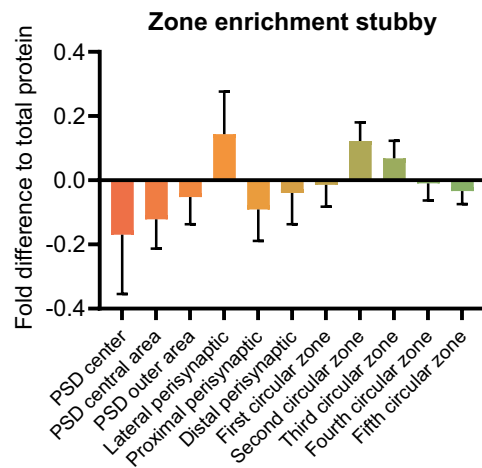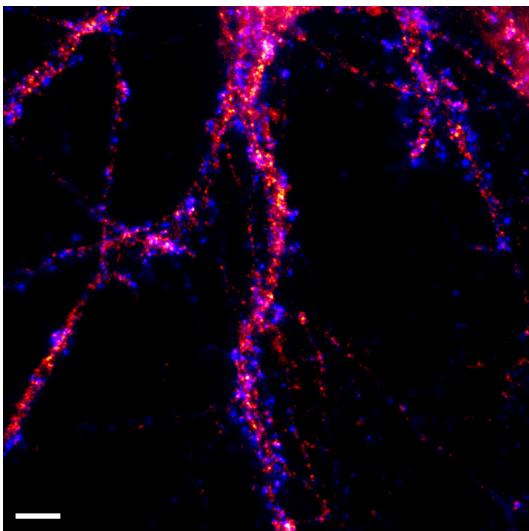

|                        |                  |            |
|------------------------|------------------|------------|
| Whole cell copy number | 81566.9 ± 6386.5 |            |
| Spine copy number      | 17.7 ± 3.1       |            |
| Function               | Ion channel      |            |
|                        | Mushroom         | Stubby     |
| Spine copy number      | 14.4 ± 2.5       | 21.7 ± 3.8 |
| % of total protein     | 0.0 ± 0.0%       | 0.0 ± 0.0% |
| Molarity (μM)          | 0.2 ± 0.0        | 0.2 ± 0.0  |
| PSD copy number        | 1 ± 0.2          | 2 ± 0.3    |
| % in PSD               | 7.0 ± 1.2%       | 9.2 ± 1.6% |

|          | Spine copy number | % of total protein | Molarity ( $\mu\text{M}$ ) | PSD copy number |
|----------|-------------------|--------------------|----------------------------|-----------------|
| Mushroom | $14.4 \pm 2.5$    | $0.0 \pm 0.0\%$    | $0.2 \pm 0.0$              | $1 \pm 0.2$     |
| Stubby   | $21.7 \pm 3.8$    | $0.0 \pm 0.0\%$    | $0.2 \pm 0.0$              | $2 \pm 0.3$     |

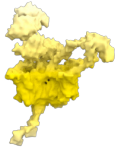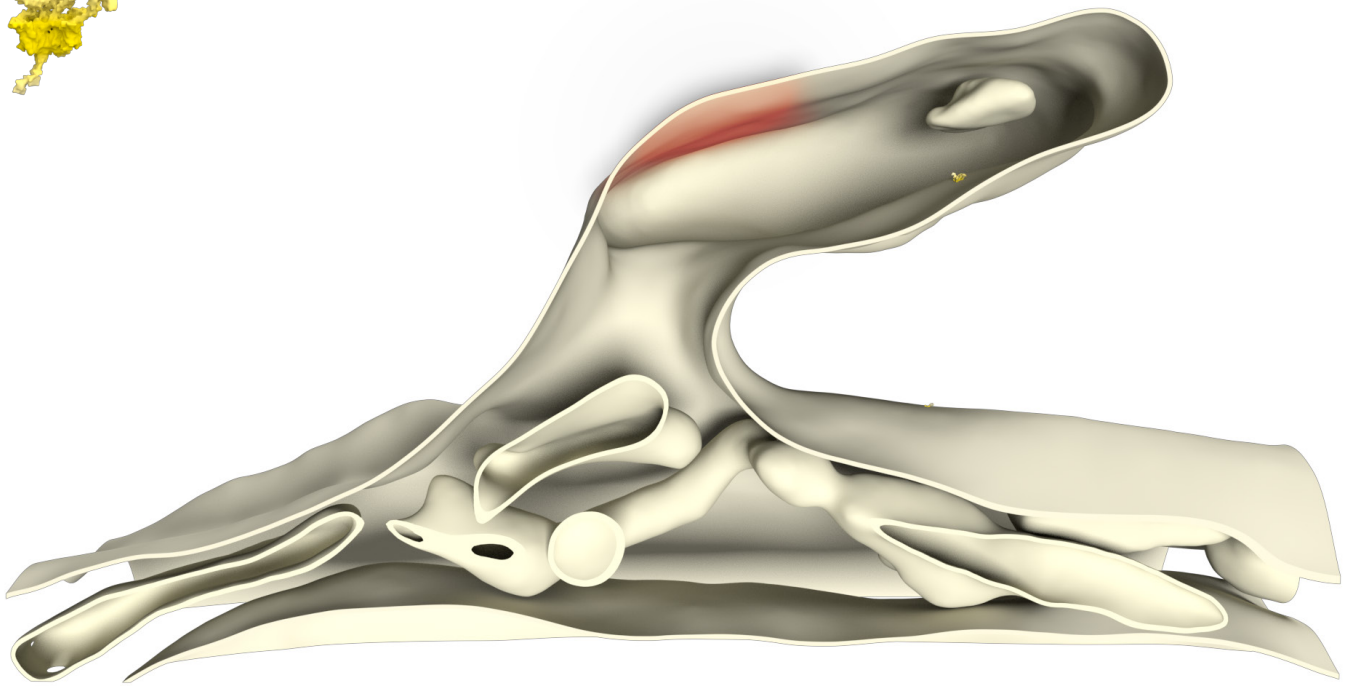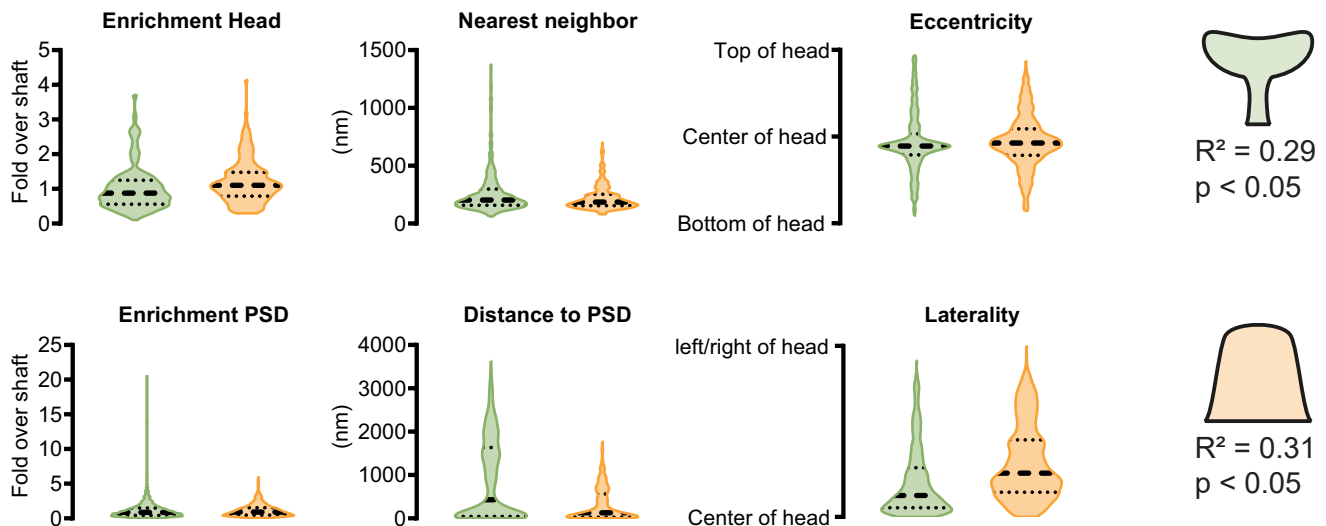

|          | Spine copy number | % of total protein | Molarity ( $\mu\text{M}$ ) | PSD copy number |
|----------|-------------------|--------------------|----------------------------|-----------------|
| Mushroom | $14.4 \pm 2.5$    | $0.0 \pm 0.0\%$    | $0.2 \pm 0.0$              | $1 \pm 0.2$     |
| Stubby   | $21.7 \pm 3.8$    | $0.0 \pm 0.0\%$    | $0.2 \pm 0.0$              | $2 \pm 0.3$     |

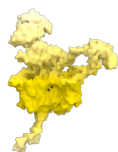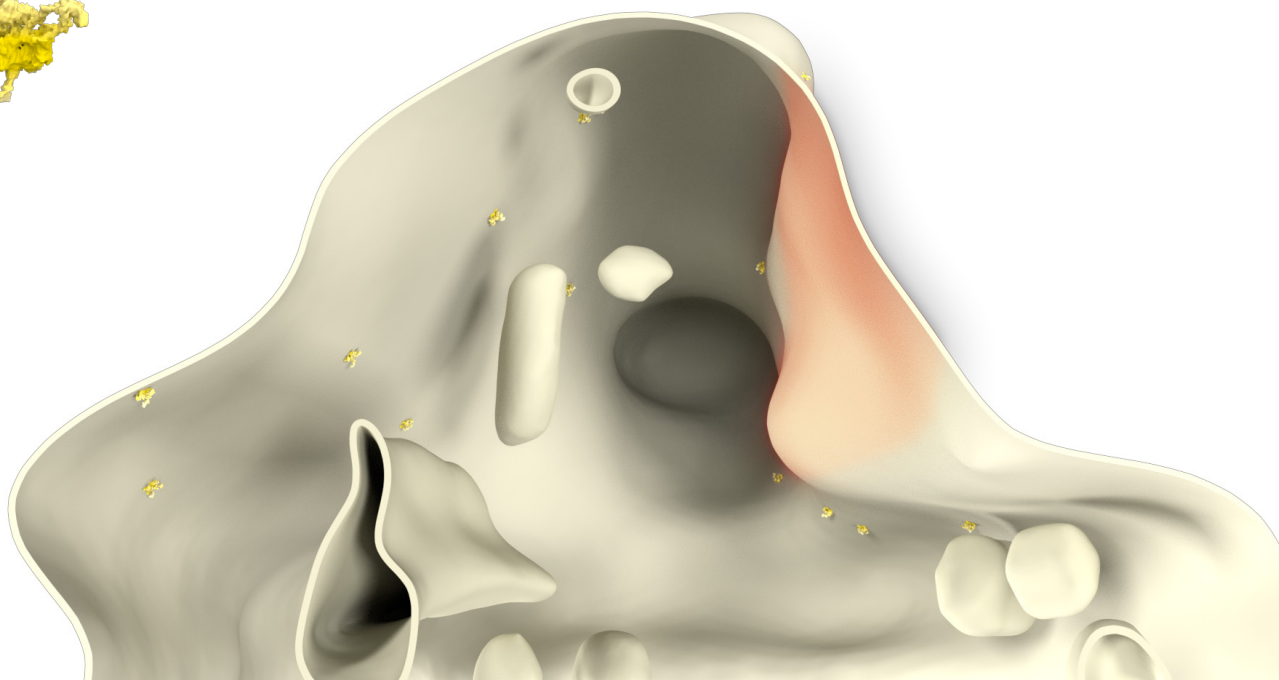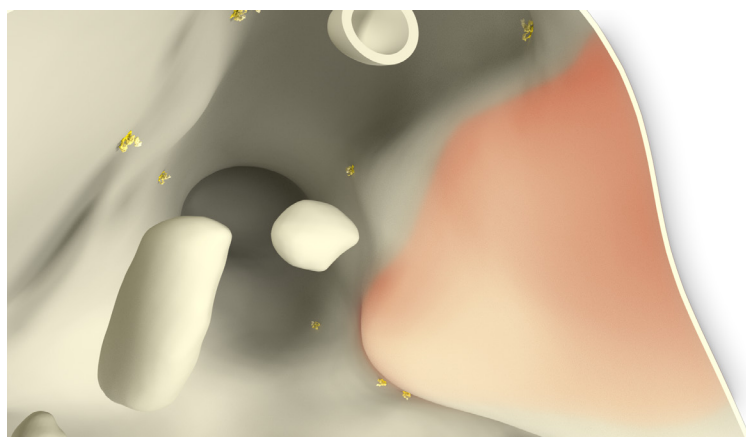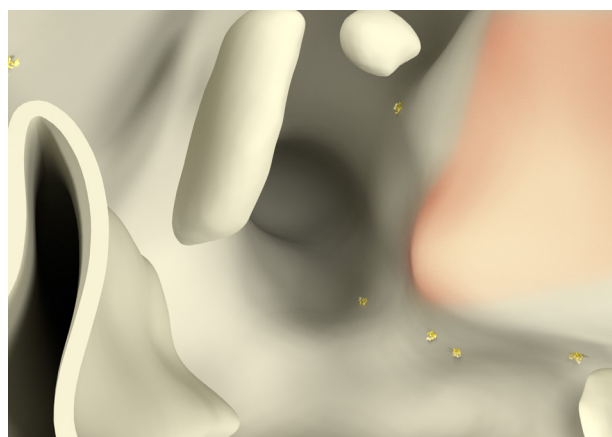

## References

**Antibody:** Merck Millipore 06-811

**PDB Identifier:** 6agf

**Literature:**

Westenbroek et al., 1989, Neuron



## Na<sub>v</sub>1.3 (Gene: Scn3a, Uniprot ID: P08104)

**Known function:** Sodium channel

**Known organization:** Transmembrane protein

**Known Interactions:** Na β 1

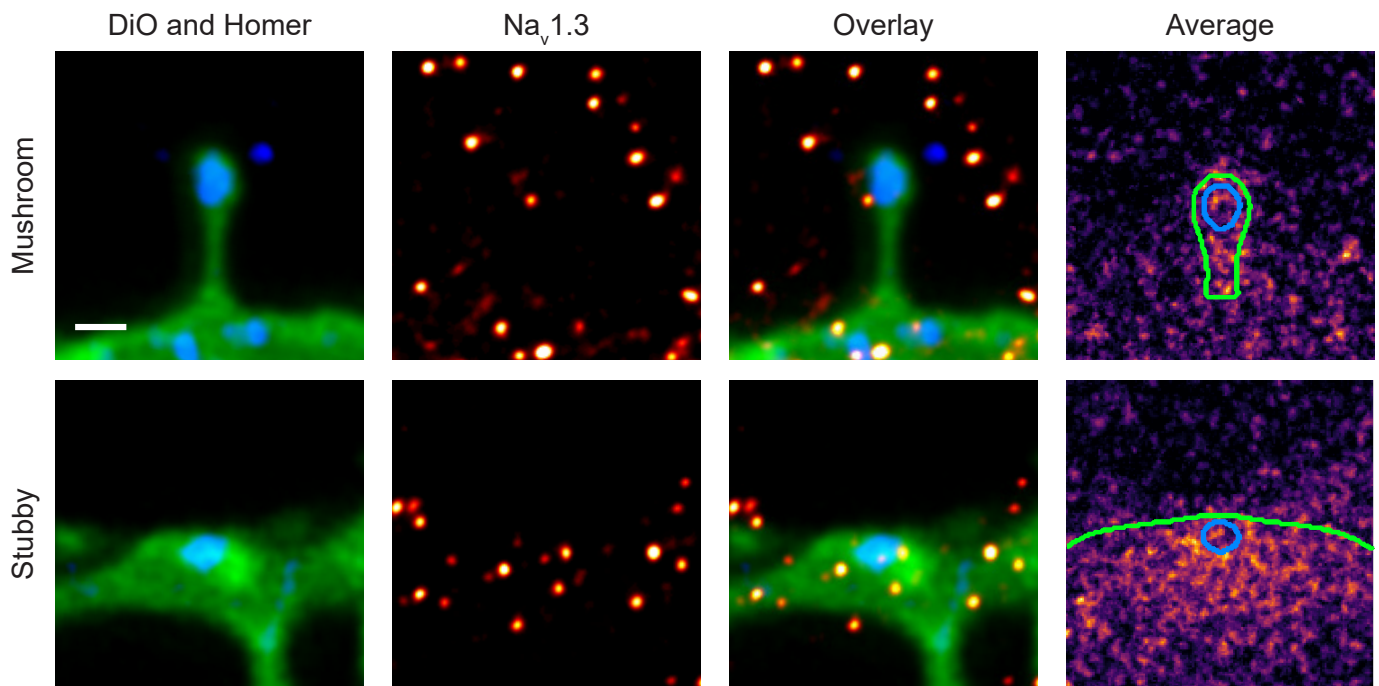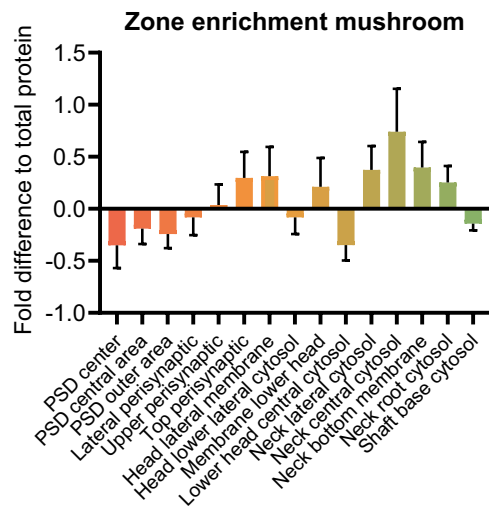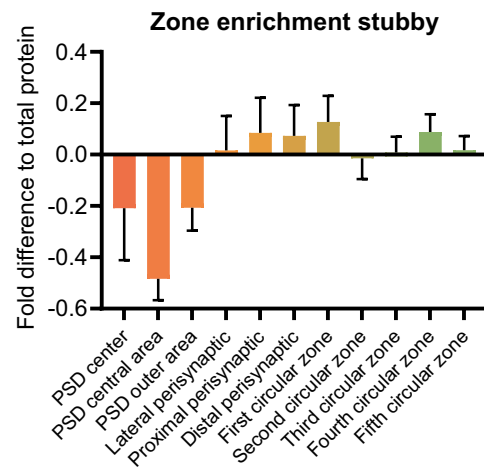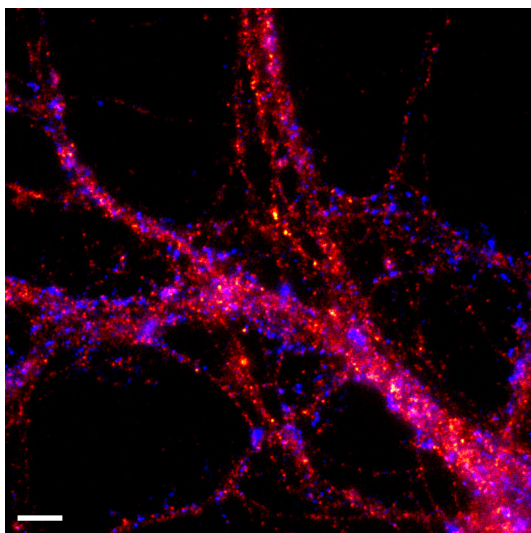

|                        |                |            |
|------------------------|----------------|------------|
| Whole cell copy number | 2645.3 ± 454.1 |            |
| Spine copy number      | 0.1 ± 0.1      |            |
| Function               | Ion channel    |            |
|                        | Mushroom       | Stubby     |
| Spine copy number      | 0.1 ± 0.1      | 0.1 ± 0.1  |
| % of total protein     | 0.0 ± 0.0%     | 0.0 ± 0.0% |
| Molarity (μM)          | 0.0 ± 0.0      | 0.0 ± 0.0  |
| PSD copy number        | 0 ± 0.0        | 0 ± 0.0    |
| % in PSD               | 0.0 ± 0.0%     | 0.0 ± 0.0% |

|          | Spine copy number | % of total protein | Molarity ( $\mu\text{M}$ ) | PSD copy number |
|----------|-------------------|--------------------|----------------------------|-----------------|
| Mushroom | $0.1 \pm 0.1$     | $0.0 \pm 0.0\%$    | $0.0 \pm 0.0$              | $0 \pm 0.0$     |
| Stubby   | $0.1 \pm 0.1$     | $0.0 \pm 0.0\%$    | $0.0 \pm 0.0$              | $0 \pm 0.0$     |

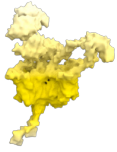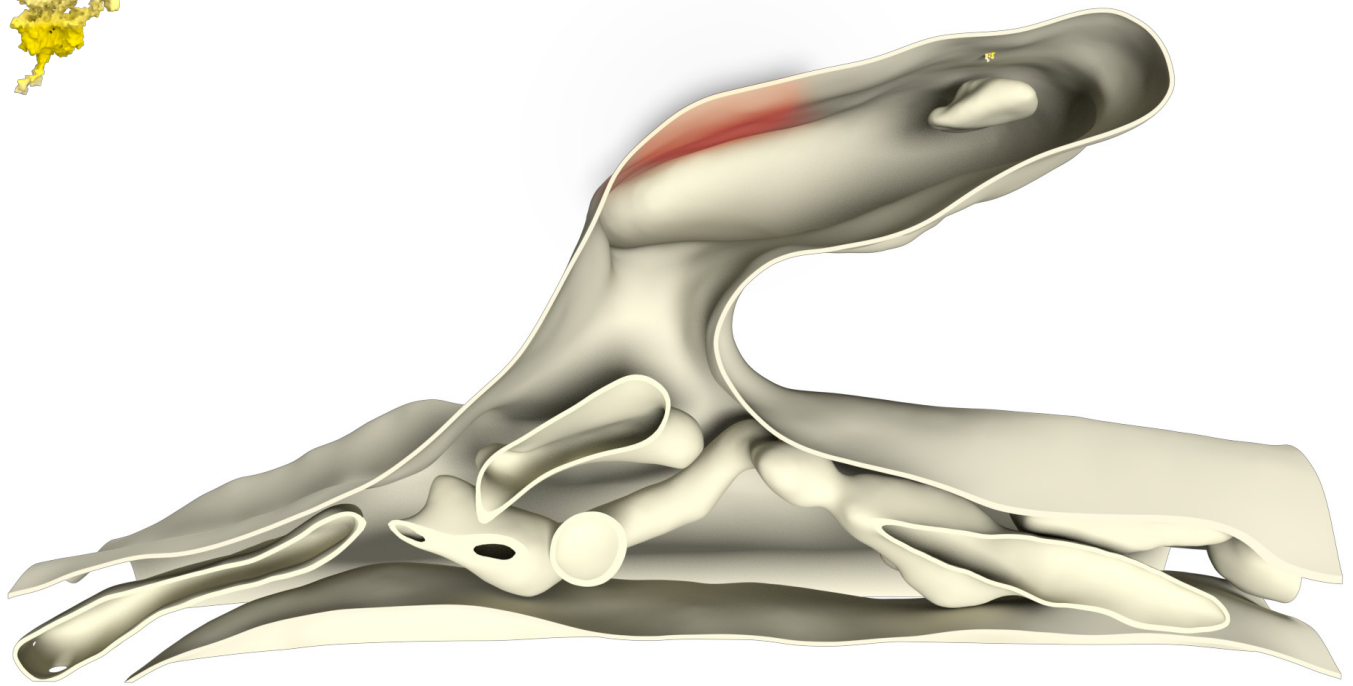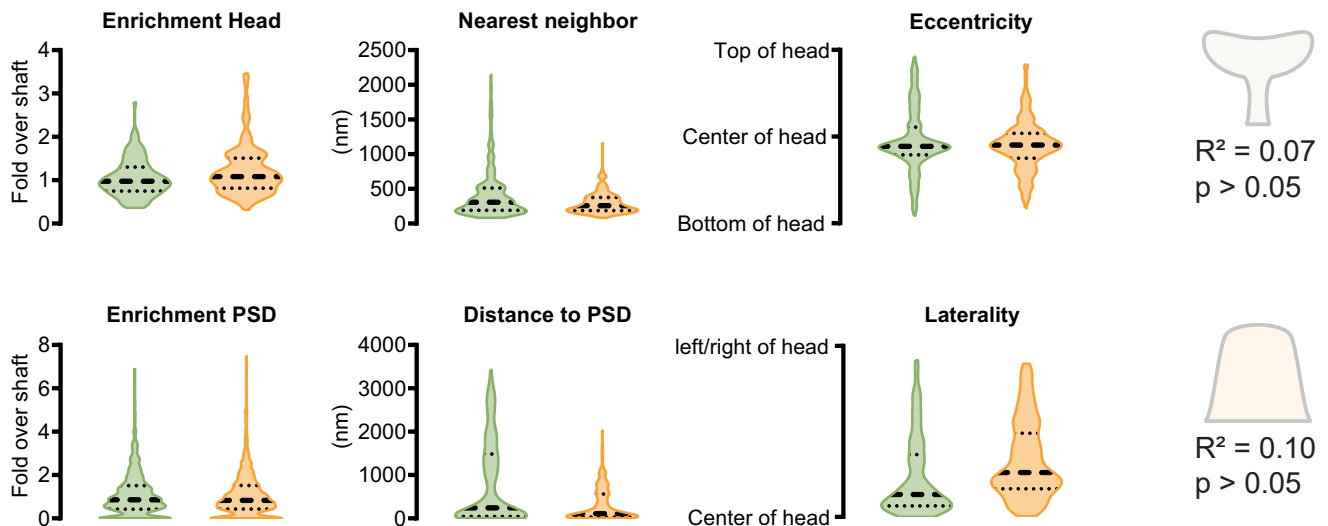

|          | Spine copy number | % of total protein | Molarity ( $\mu\text{M}$ ) | PSD copy number |
|----------|-------------------|--------------------|----------------------------|-----------------|
| Mushroom | $0.1 \pm 0.1$     | $0.0 \pm 0.0\%$    | $0.0 \pm 0.0$              | $0 \pm 0.0$     |
| Stubby   | $0.1 \pm 0.1$     | $0.0 \pm 0.0\%$    | $0.0 \pm 0.0$              | $0 \pm 0.0$     |

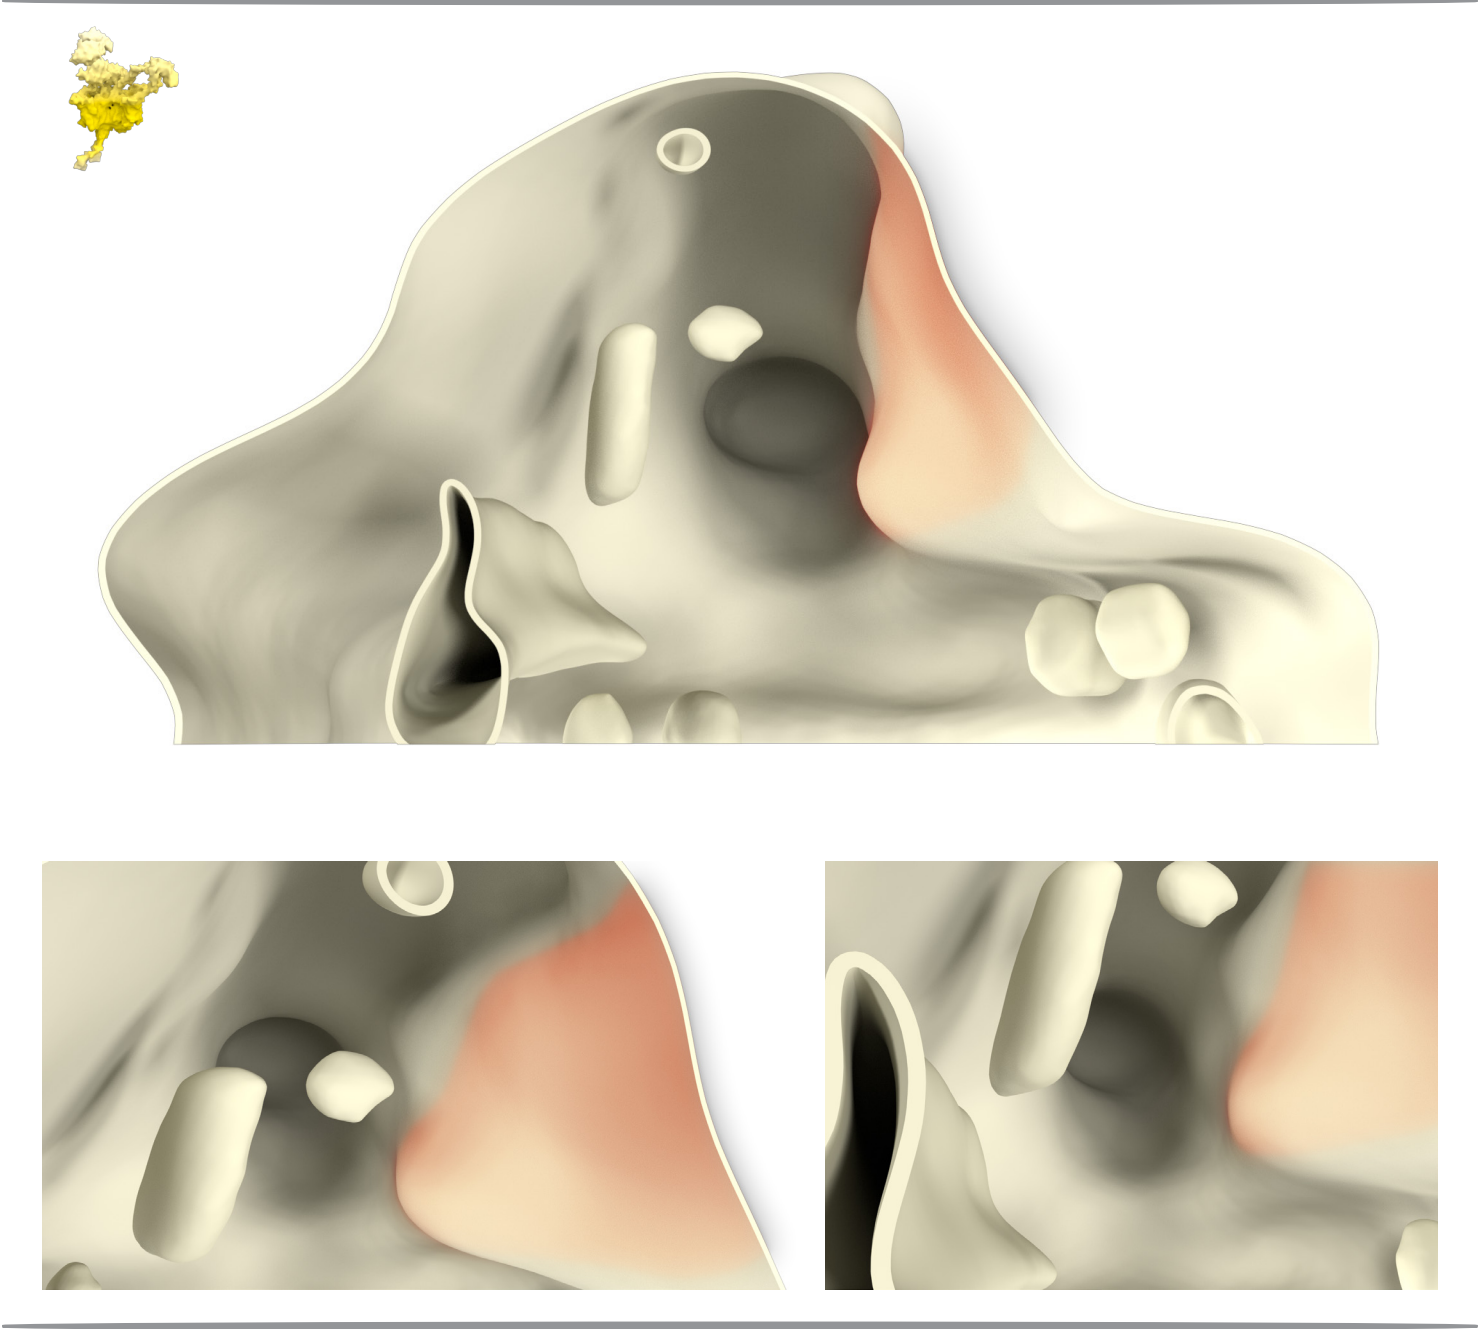

References

Antibody:
Literature:

PDB Identifier: 6agf

Westenbroek et al., 1989, Neuron

Whitaker et al., 2001, Brain Res. Mol. Brain Res.



Neurofilament H (Gene: Nefh, Uniprot ID: P16884)

**Known function:** Forms neurofilaments, Regulates ER and Endosome location

**Known organization:** Cytosolic, Forms triplet with Neurofilament L and M

**Known Interactions:** Neurofilament L and M,  $\alpha$ -internexin, DLGAP1, Myosin5a, Dopamine D1 receptor

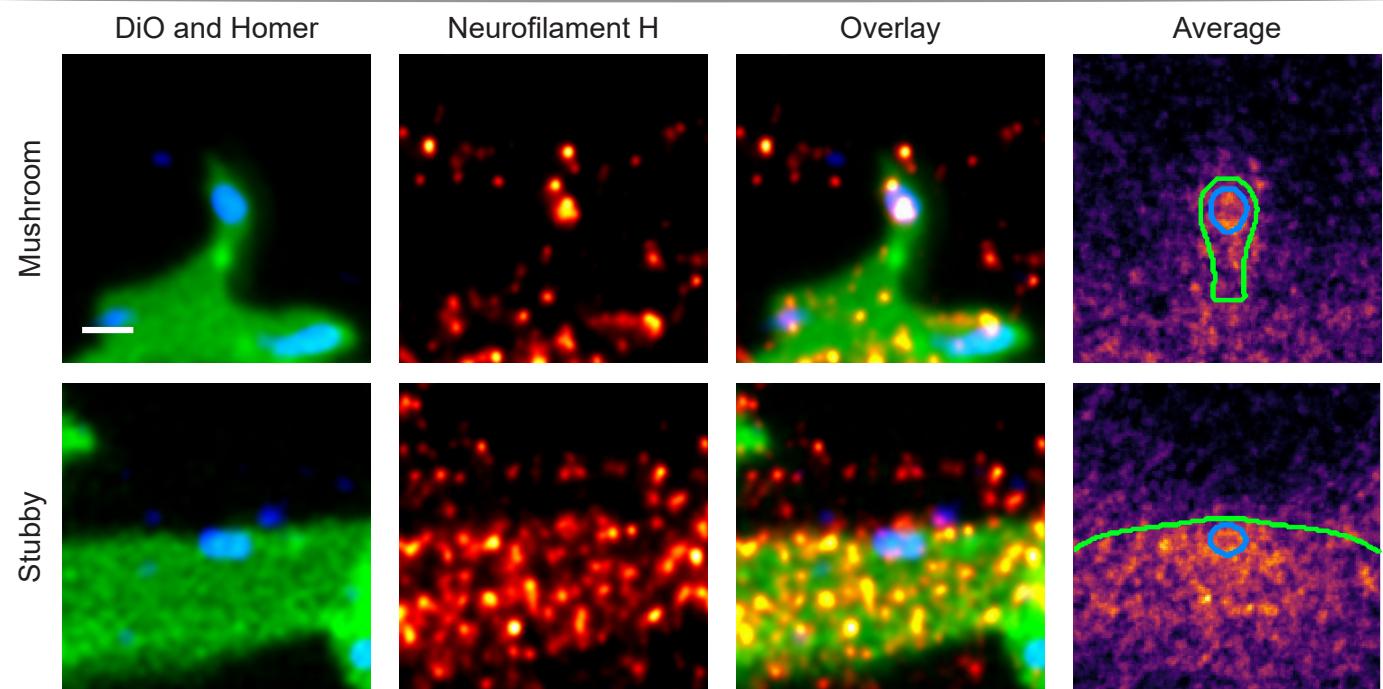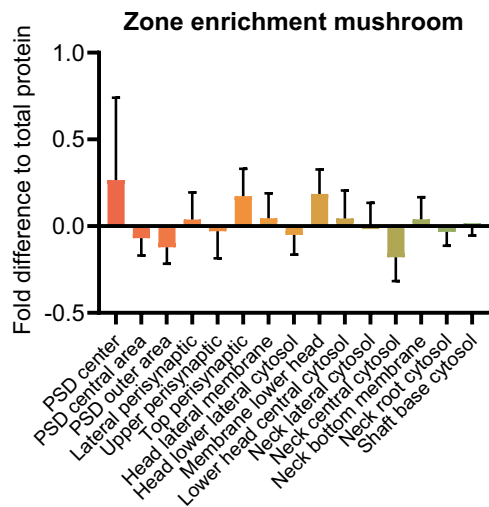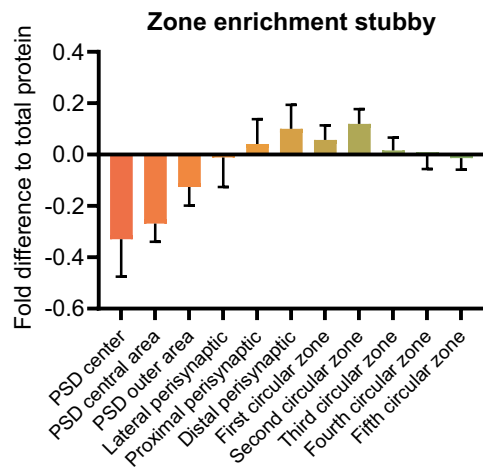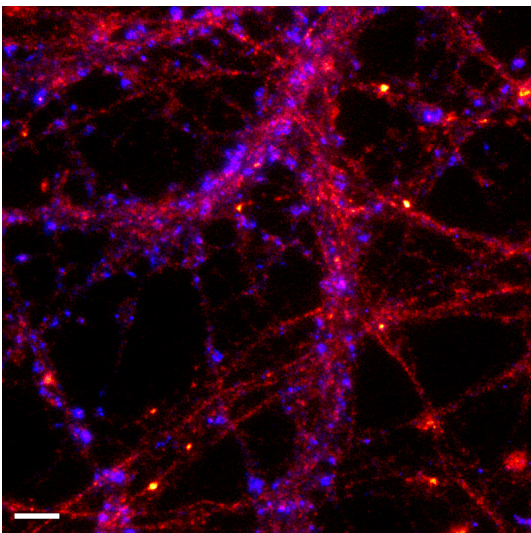

|                        |                     |             |
|------------------------|---------------------|-------------|
| Whole cell copy number | 428846.5 ± 342726.1 |             |
| Spine copy number      | 48.0 ± 42.5         |             |
| Function               | Cytoskeleton        |             |
|                        | Mushroom            | Stubby      |
| Spine copy number      | 37.3 ± 33.1         | 65.9 ± 58.4 |
| % of total protein     | 0.0 ± 0.0%          | 0.0 ± 0.0%  |
| Molarity (μM)          | 0.5 ± 0.4           | 0.6 ± 0.6   |
| PSD copy number        | 4 ± 3.5             | 7 ± 6.2     |
| % in PSD               | 10.7 ± 9.5%         | 10.6 ± 9.4% |

|          | Spine copy number | % of total protein | Molarity ( $\mu\text{M}$ ) | PSD copy number |
|----------|-------------------|--------------------|----------------------------|-----------------|
| Mushroom | $37.3 \pm 33.1$   | $0.0 \pm 0.0\%$    | $0.5 \pm 0.4$              | $4 \pm 3.5$     |
| Stubby   | $65.9 \pm 58.4$   | $0.0 \pm 0.0\%$    | $0.6 \pm 0.6$              | $7 \pm 6.2$     |

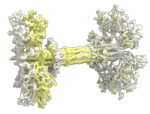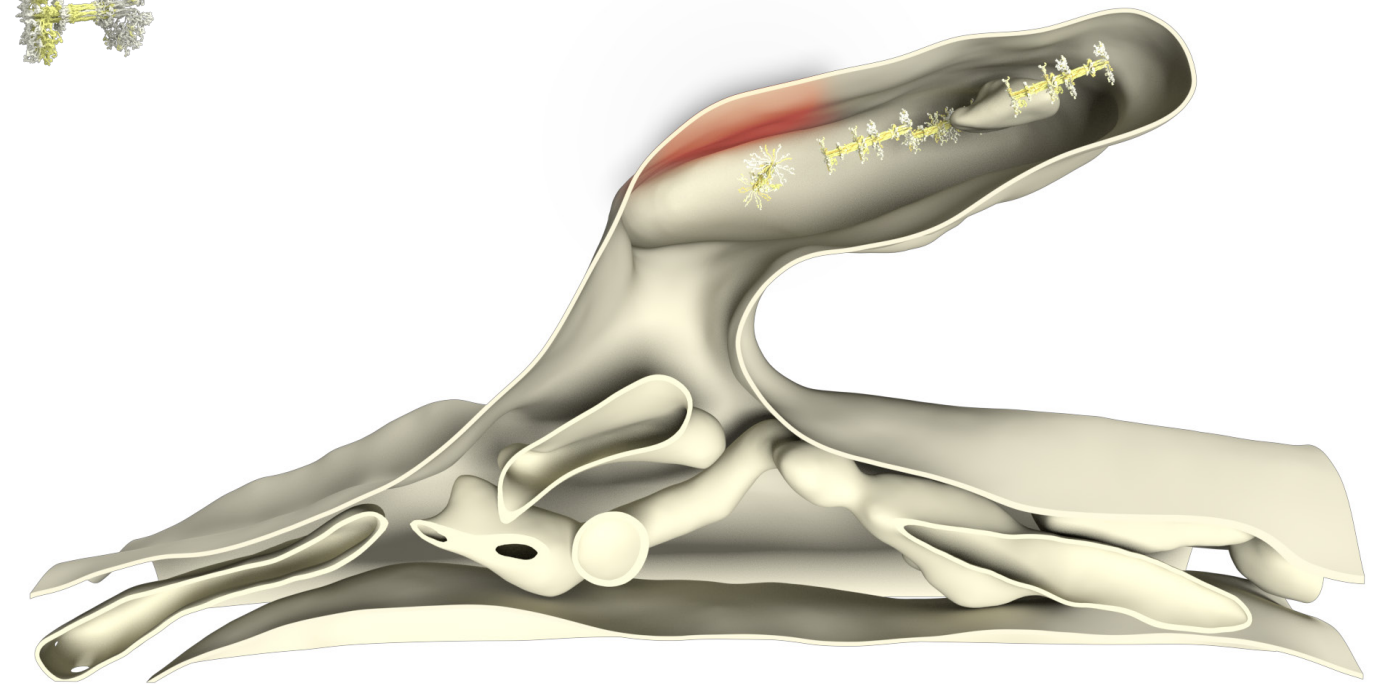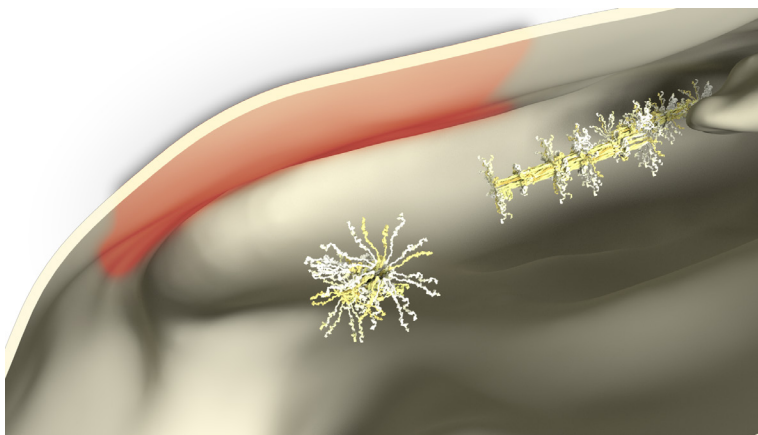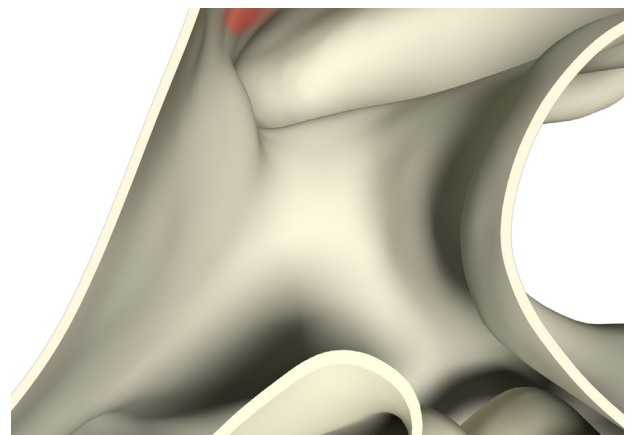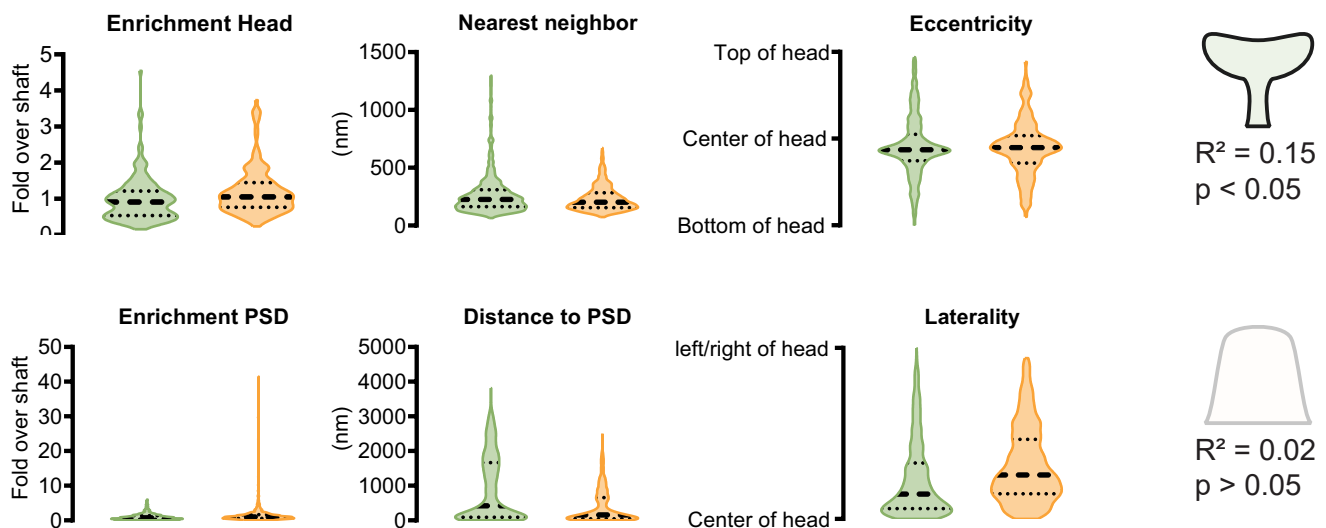

|          | Spine copy number | % of total protein | Molarity ( $\mu\text{M}$ ) | PSD copy number |
|----------|-------------------|--------------------|----------------------------|-----------------|
| Mushroom | $37.3 \pm 33.1$   | $0.0 \pm 0.0\%$    | $0.5 \pm 0.4$              | $4 \pm 3.5$     |
| Stubby   | $65.9 \pm 58.4$   | $0.0 \pm 0.0\%$    | $0.6 \pm 0.6$              | $7 \pm 6.2$     |

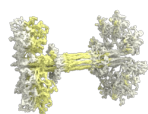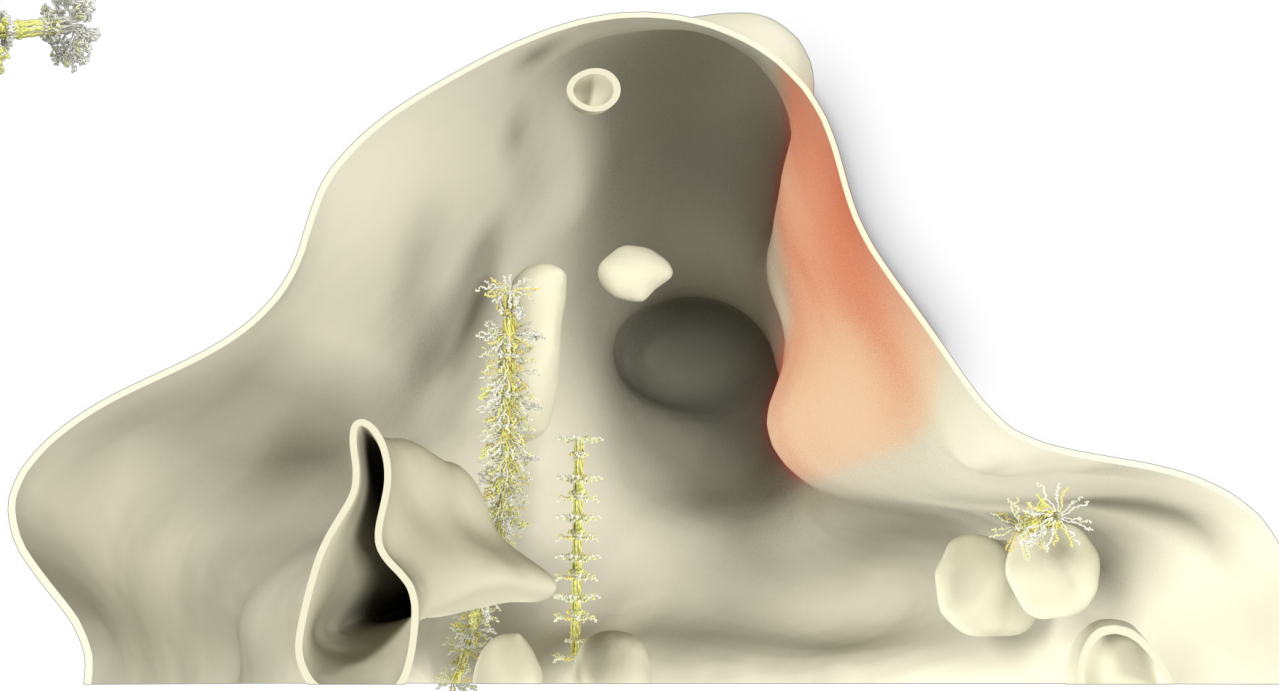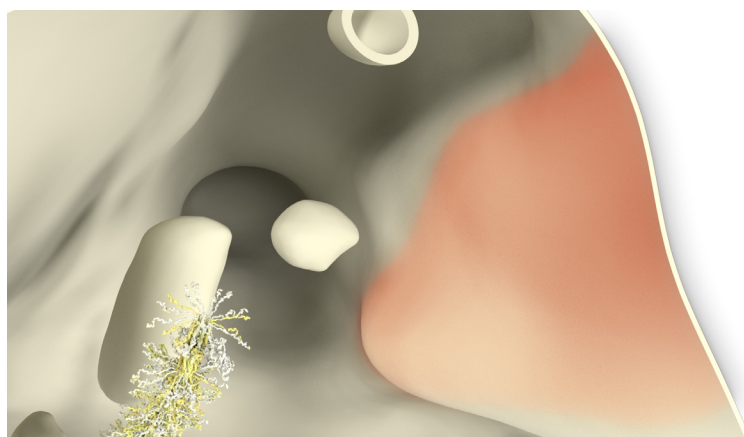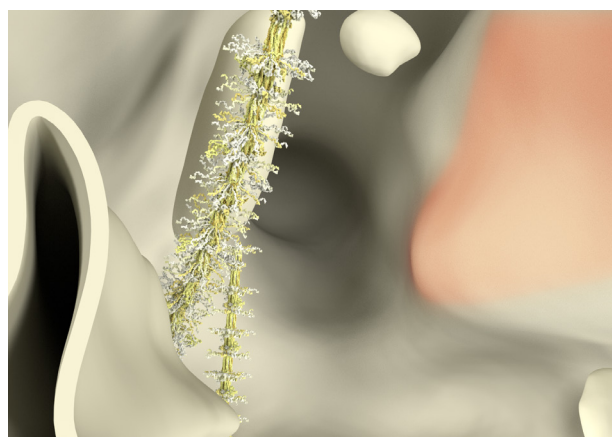

## References

**Antibody:** LS Bio LS-C143052

**PDB Identifier:** 3s4r, 3swk, 3uf1, 1gk4, 3tnu

### Literature:

Hirao et al., 2000, Genes Cells

Rao et al., 2011, PLoS One

Yuan et al., 2012, J. Cell. Sci.

Yuan et al., 2015a, Mol. Psychiatry

Yuan et al., 2015b, Mol. Psychiatry



## Neurofilament L (Gene: Nefl, Uniprot ID: P19527)

**Known function:** Forms neurofilaments, Regulates ER and Endosome location

**Known organization:** Cytosolic, Forms triplet with Neurofilament L and M

**Known Interactions:** Neurofilament L and M,  $\alpha$ -internexin, DLGAP1, Myosin5a, Dopamine D1 receptor

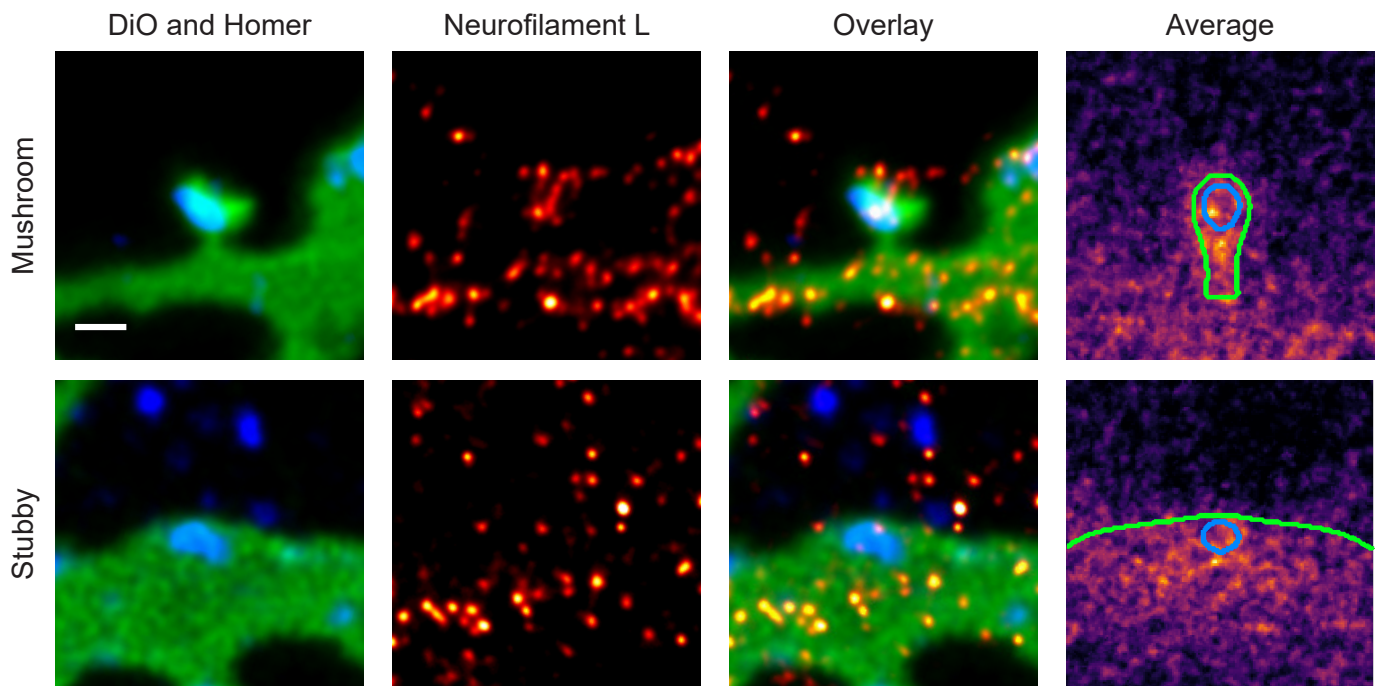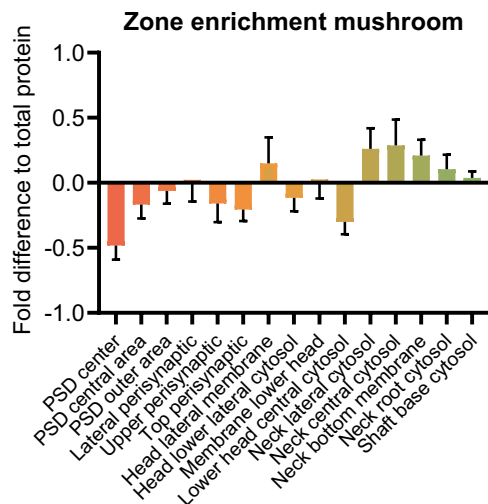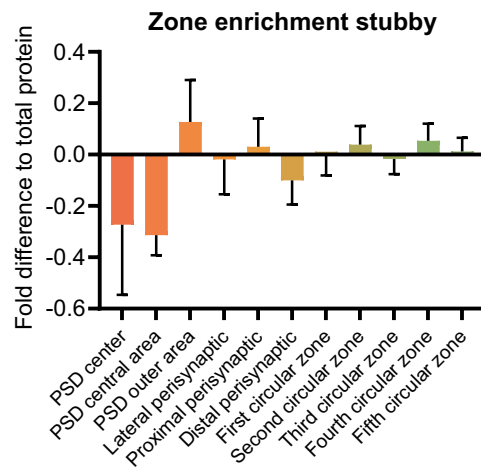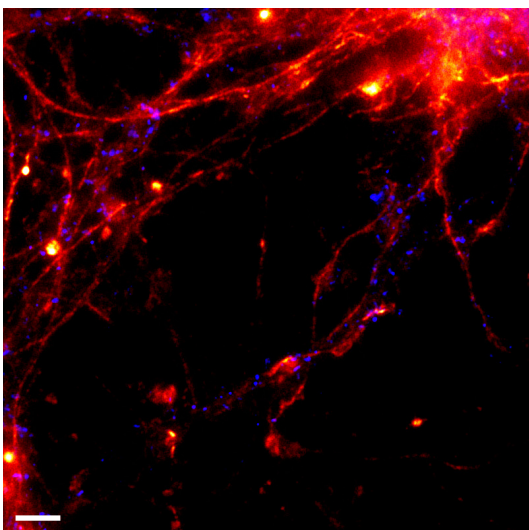

|                        |                       |               |
|------------------------|-----------------------|---------------|
| Whole cell copy number | 5345200.7 ± 1726386.6 |               |
| Spine copy number      | 428.3 ± 248.4         |               |
| Function               | Cytoskeleton          |               |
|                        | Mushroom              | Stubby        |
| Spine copy number      | 371.2 ± 215.3         | 486.4 ± 282.1 |
| % of total protein     | 0.1 ± 0.1%            | 0.1 ± 0.1%    |
| Molarity (μM)          | 4.7 ± 2.7             | 4.6 ± 2.7     |
| PSD copy number        | 65 ± 37.7             | 68 ± 39.4     |
| % in PSD               | 17.5 ± 10.2%          | 14.0 ± 8.1%   |

|          | Spine copy number | % of total protein | Molarity ( $\mu\text{M}$ ) | PSD copy number |
|----------|-------------------|--------------------|----------------------------|-----------------|
| Mushroom | $371.2 \pm 215.3$ | $0.1 \pm 0.1\%$    | $4.7 \pm 2.7$              | $65 \pm 37.7$   |
| Stubby   | $486.4 \pm 282.1$ | $0.1 \pm 0.1\%$    | $4.6 \pm 2.7$              | $68 \pm 39.4$   |

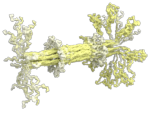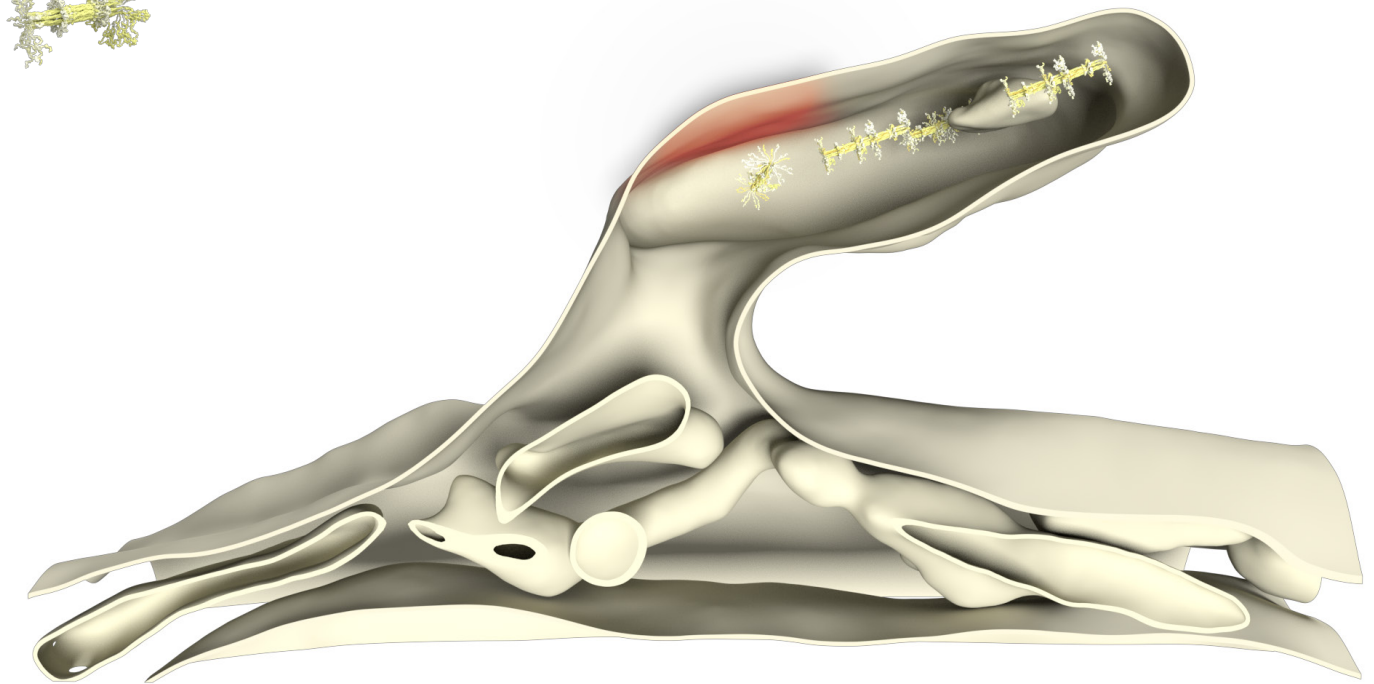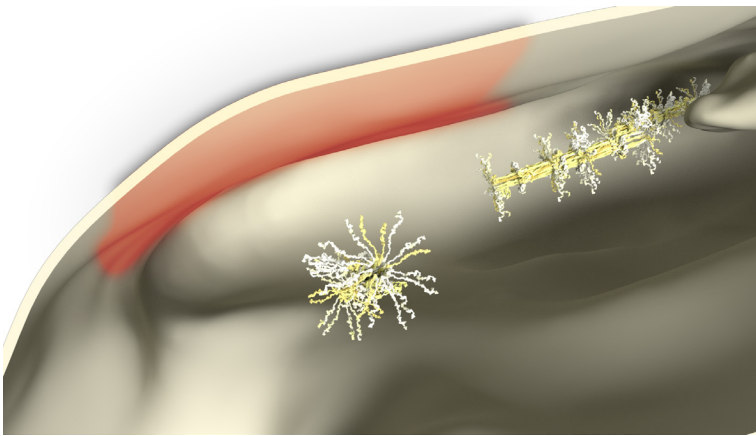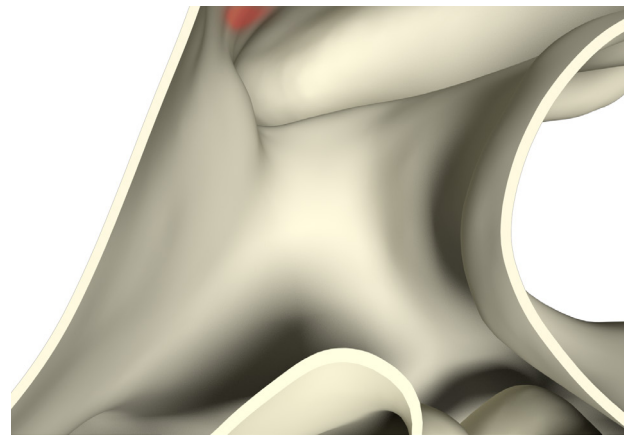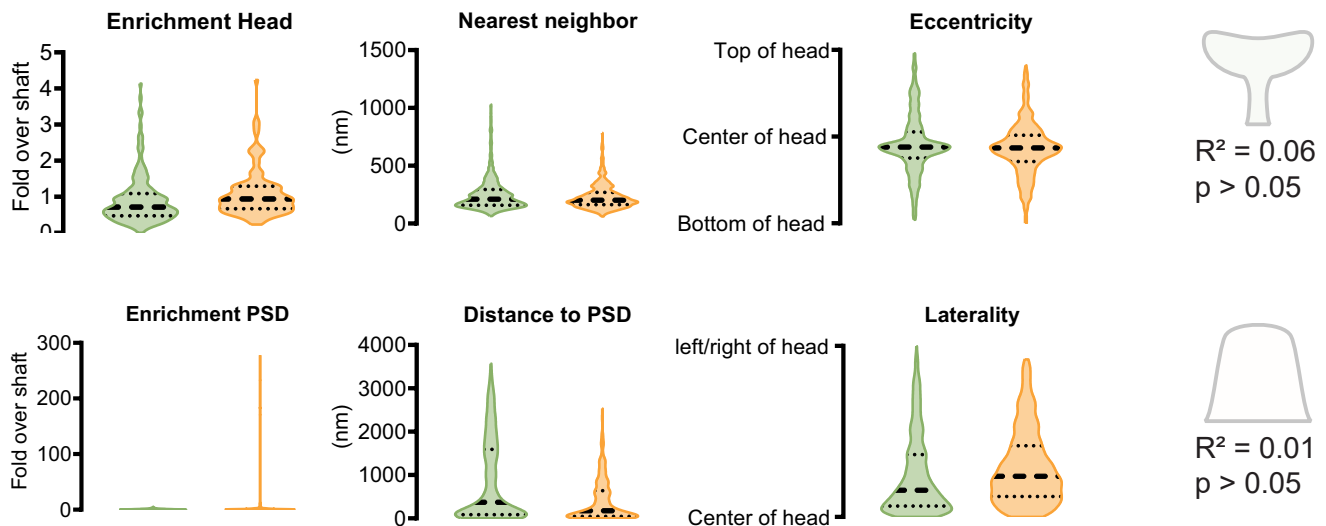

|          | Spine copy number | % of total protein | Molarity ( $\mu\text{M}$ ) | PSD copy number |
|----------|-------------------|--------------------|----------------------------|-----------------|
| Mushroom | $371.2 \pm 215.3$ | $0.1 \pm 0.1\%$    | $4.7 \pm 2.7$              | $65 \pm 37.7$   |
| Stubby   | $486.4 \pm 282.1$ | $0.1 \pm 0.1\%$    | $4.6 \pm 2.7$              | $68 \pm 39.4$   |

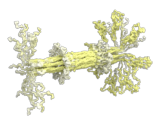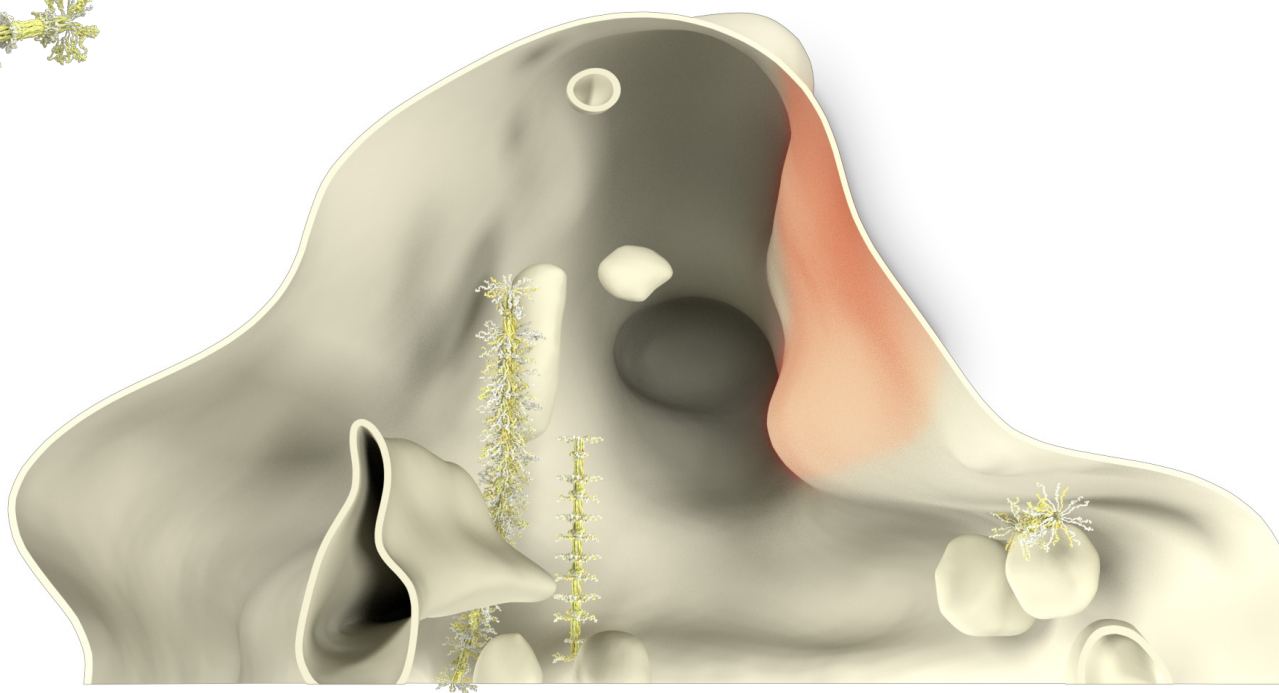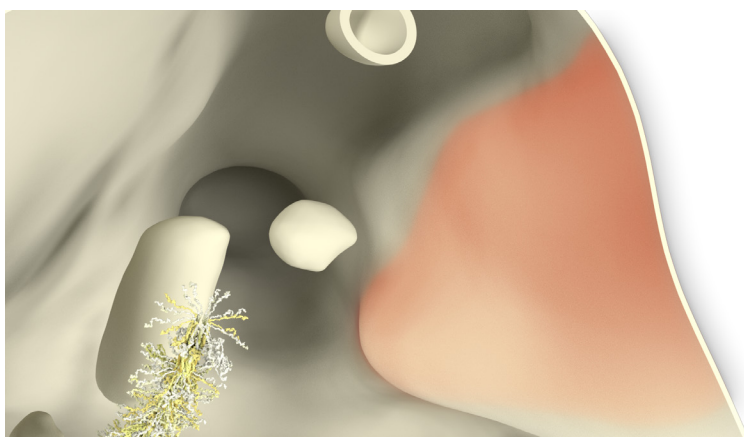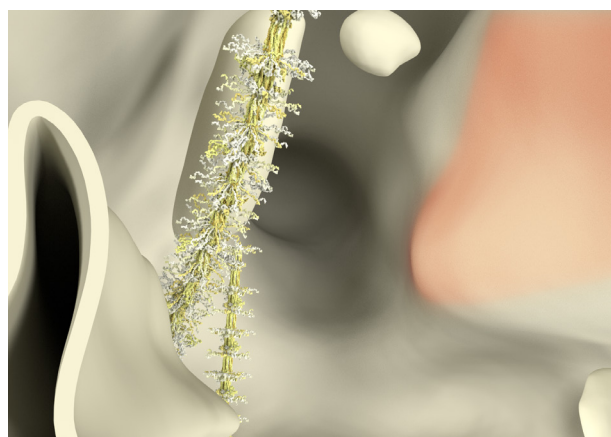

## References

**Antibody:** Synaptic Systems 171 002

**PDB Identifier:** modified NF-H

### Literature:

Hirao et al., 2000, Genes Cells

Rao et al., 2011, PLoS One

Yuan et al., 2012, J. Cell. Sci.

Yuan et al., 2015a, Mol. Psychiatry

Yuan et al., 2015b, Mol. Psychiatry



## Neuronal NO synthethase (nNOS, Gene: Nos1, Uniprot ID: P29476)

**Known function:** Production of NO, Activates cGMP production and Akt, Has neuroprotective functions by regulating glutamate and GABA release as well as NMDA receptors, Acts as retrograde signalling molecule

**Known organization:** Cytosolic

**Known Interactions:** Calmodulin, NMDA receptors, PSD93, PSD95

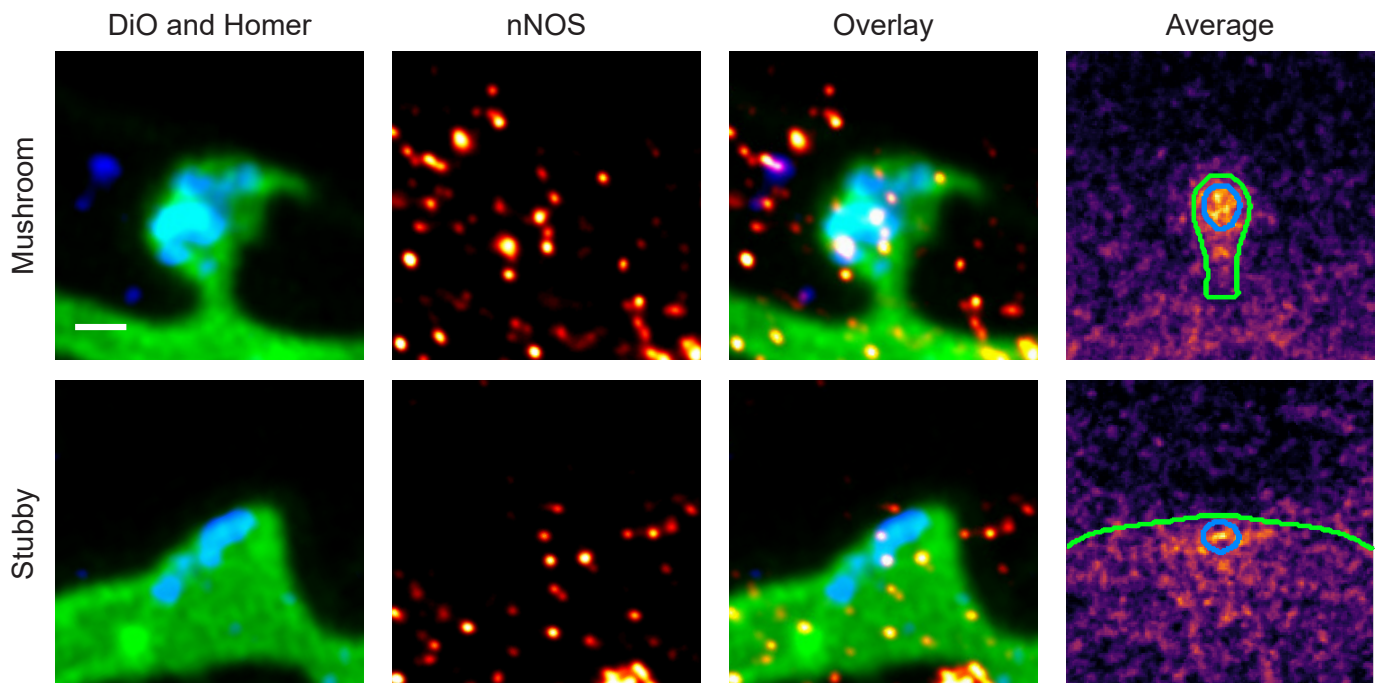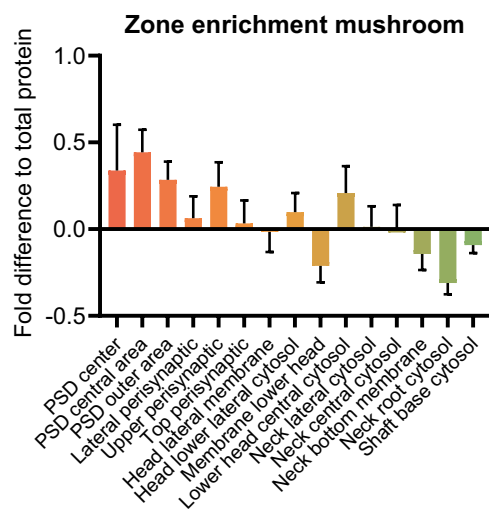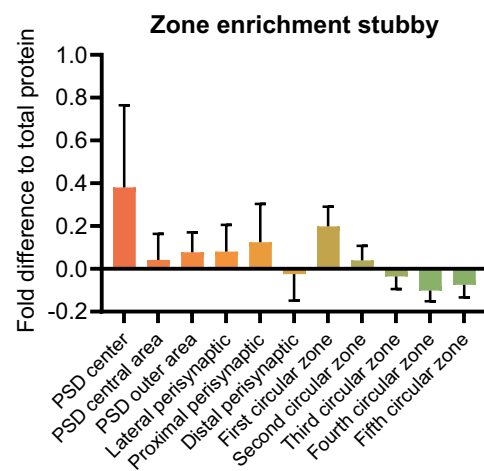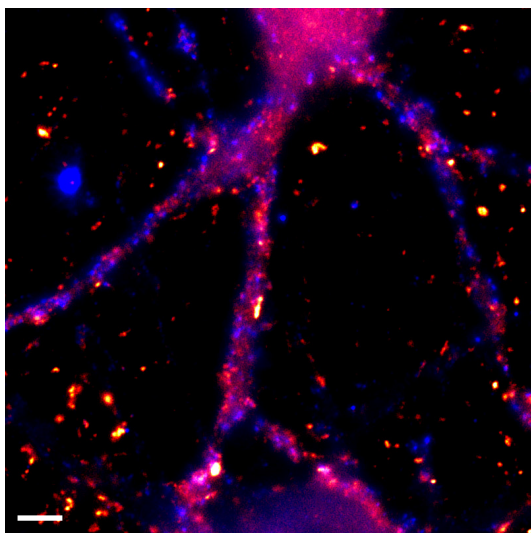

|                        |                    |             |
|------------------------|--------------------|-------------|
| Whole cell copy number | 104564.9 ± 28042.5 |             |
| Spine copy number      | 28.1 ± 8.2         |             |
| Function               | Signaling          |             |
|                        | Mushroom           | Stubby      |
| Spine copy number      | 23.9 ± 7.0         | 33.3 ± 9.7  |
| % of total protein     | 0.0 ± 0.0%         | 0.0 ± 0.0%  |
| Molarity (μM)          | 0.3 ± 0.1          | 0.3 ± 0.1   |
| PSD copy number        | 7 ± 2.0            | 5 ± 1.5     |
| % in PSD               | 29.2 ± 8.5%        | 15.0 ± 4.4% |

|          | Spine copy number | % of total protein | Molarity ( $\mu\text{M}$ ) | PSD copy number |
|----------|-------------------|--------------------|----------------------------|-----------------|
| Mushroom | $23.9 \pm 7.0$    | $0.0 \pm 0.0\%$    | $0.3 \pm 0.1$              | $7 \pm 2.0$     |
| Stubby   | $33.3 \pm 9.7$    | $0.0 \pm 0.0\%$    | $0.3 \pm 0.1$              | $5 \pm 1.5$     |

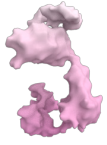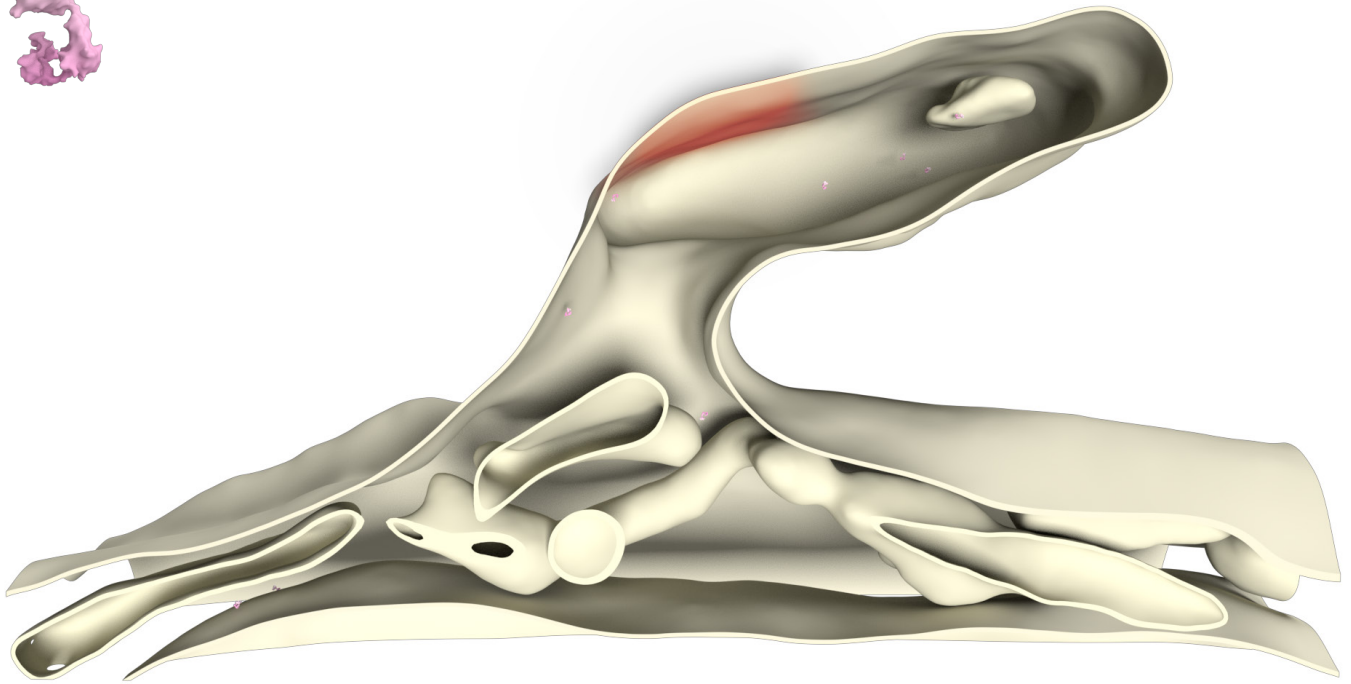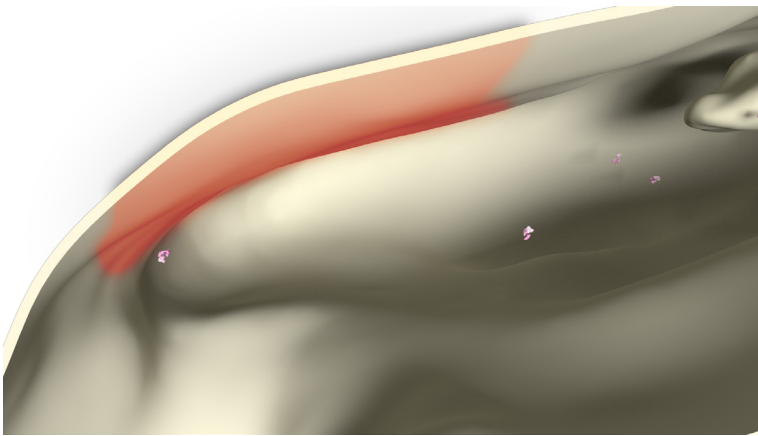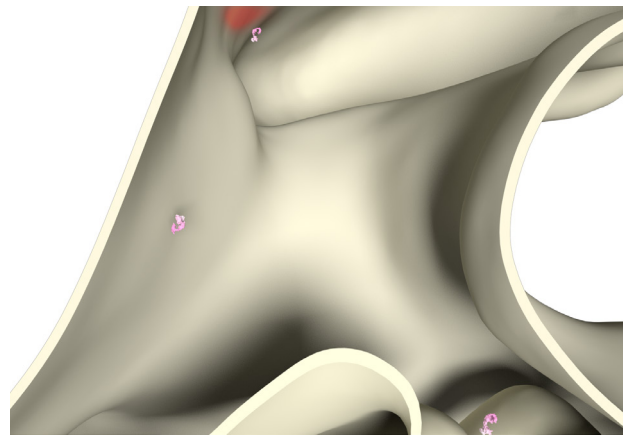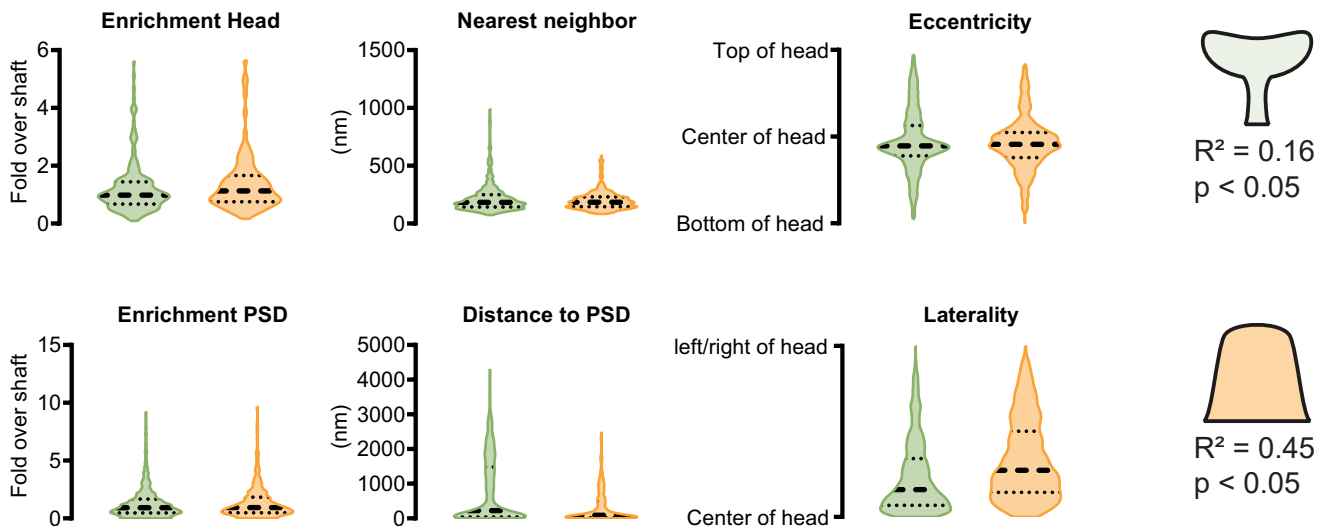

|          | Spine copy number | % of total protein | Molarity ( $\mu\text{M}$ ) | PSD copy number |
|----------|-------------------|--------------------|----------------------------|-----------------|
| Mushroom | $23.9 \pm 7.0$    | $0.0 \pm 0.0\%$    | $0.3 \pm 0.1$              | $7 \pm 2.0$     |
| Stubby   | $33.3 \pm 9.7$    | $0.0 \pm 0.0\%$    | $0.3 \pm 0.1$              | $5 \pm 1.5$     |

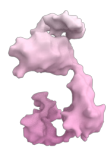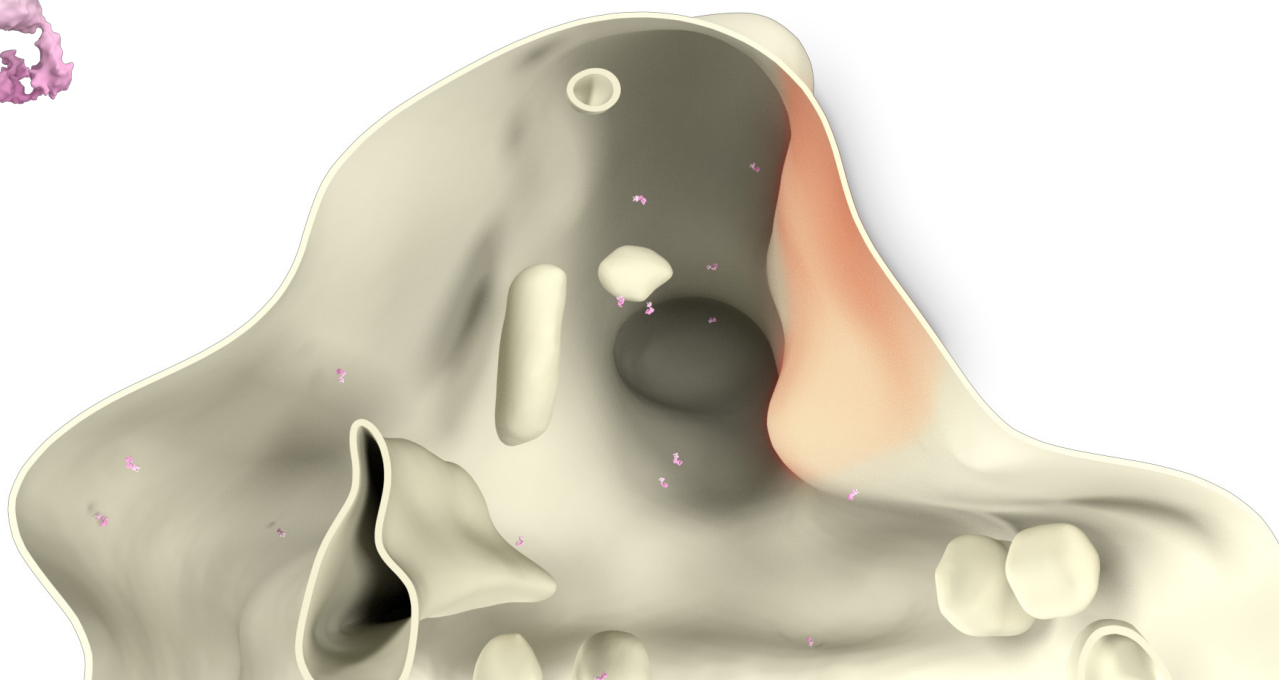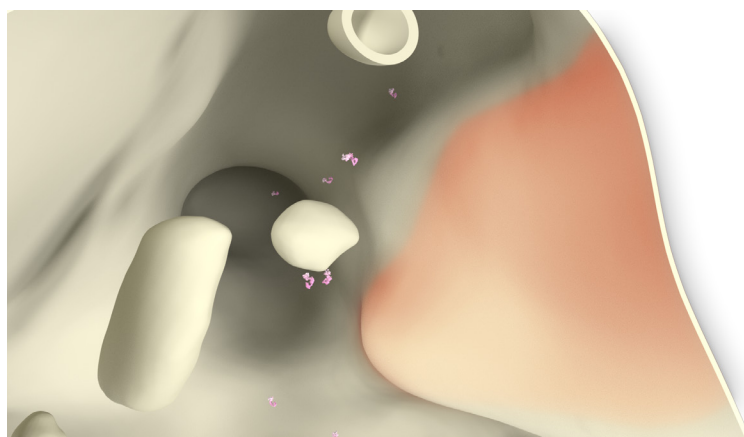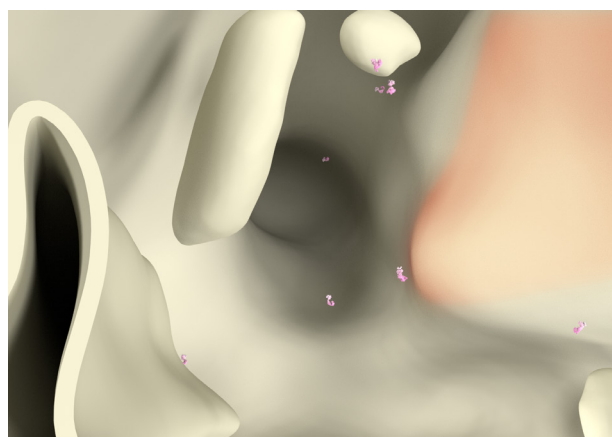

## References

**Antibody:** Thermo Scientific PA1-033

**PDB Identifier:** 1b8q, 1f20

### Literature:

Aarts et al., 2002, Science

Aoki et al., 1997, Brain Res.

Arnold et al., 1977, Proc. Natl. Acad. Sci. U S A

Bon and Garthwaite, 2003, J. Neurosci.

Brenman et al., 1996b, Cell

Calabrese et al., 2007, Nat. Rev. Neurosci.

Choi et al., 2000, Nat. Neurosci.

Getting et al., 1996, Brain Res.

Hopper et al., 2004, Eur. J. Neurosci.

Jaffrey et al., 1998, Neuron

Lonart et al., 1992, Eur. J. Pharmacol.

Ohkuma et al., 1996, Brain Res. Mol. Brain Res.

Riccio et al., 2006, Mol. Cell.



**NSF (Vesicle-fusing ATPase, Gene: Nsf, Uniprot ID: Q9QUL6)**

**Known function:** Disassembly of trans-SNARE complexes

**Known organization:** Cytosolic, Homohexamer

**Known Interactions:** α and β SNAP, GluR2

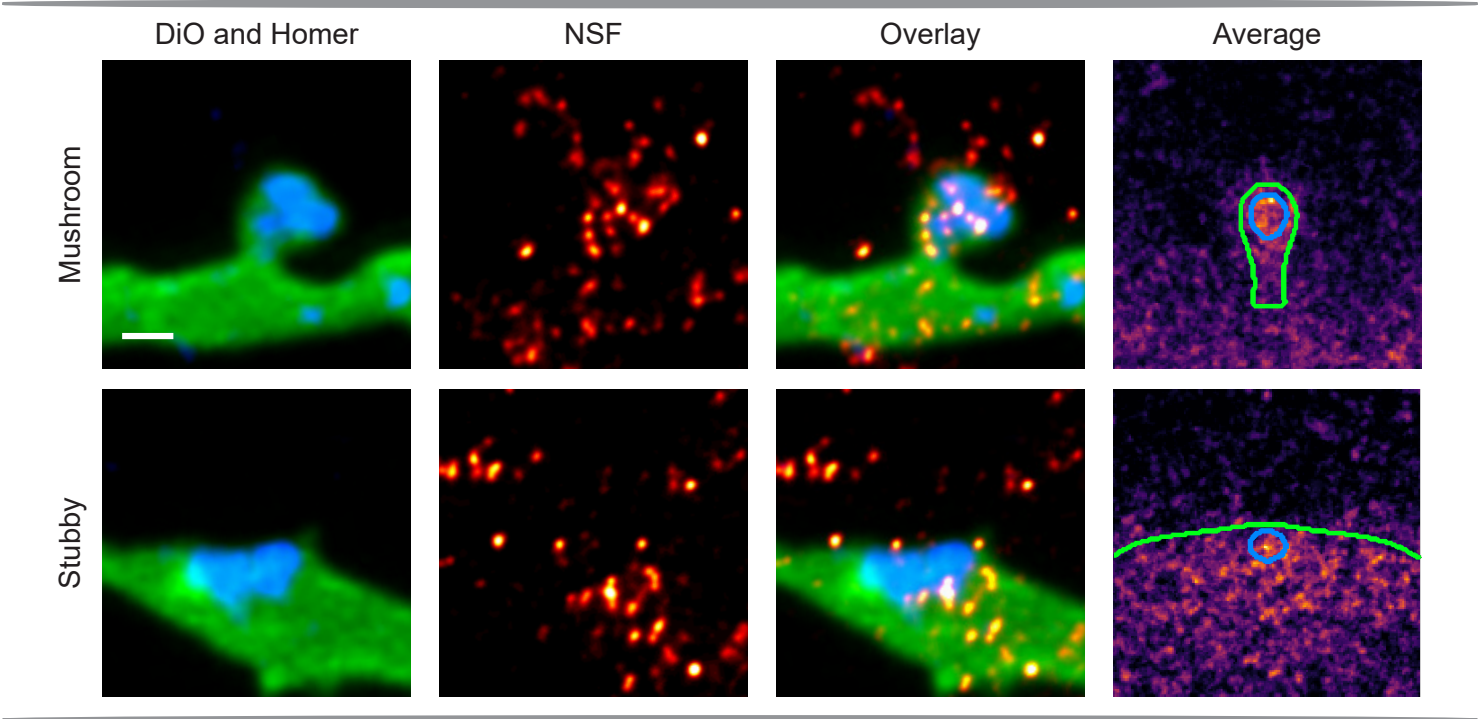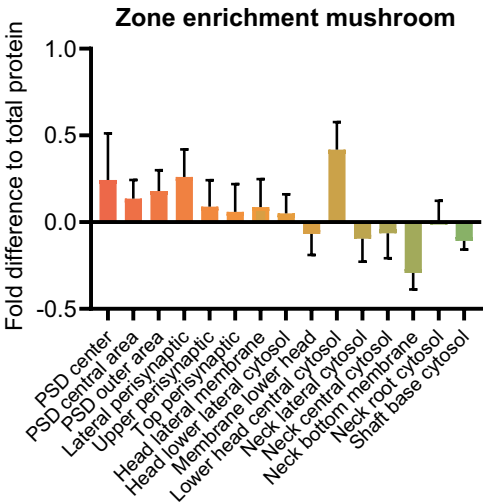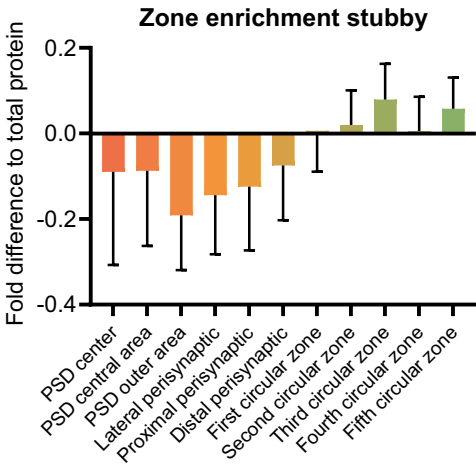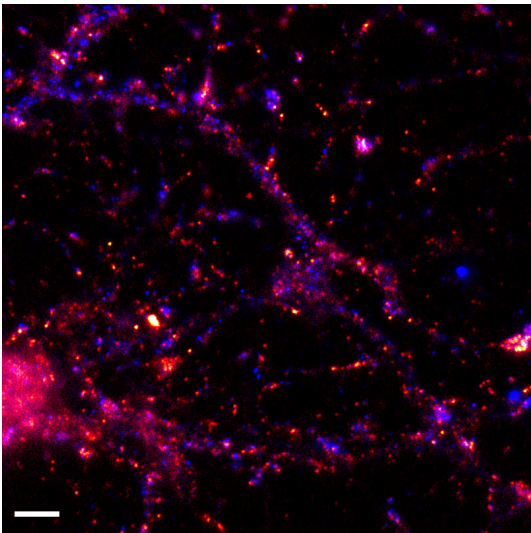

|                        |                            |                |
|------------------------|----------------------------|----------------|
| Whole cell copy number | 10485623.2 ± 276848.8      |                |
| Spine copy number      | 2916.4 ± 400.8             |                |
| Function               | SNAREs and assoc. proteins |                |
|                        | Mushroom                   | Stubby         |
| Spine copy number      | 2343.6 ± 322.1             | 3721.2 ± 511.4 |
| % of total protein     | 0.9 ± 0.1%                 | 1.3 ± 0.2%     |
| Molarity (μM)          | 29.8 ± 4.1                 | 35.2 ± 4.8     |
| PSD copy number        | 604 ± 83.0                 | 451 ± 62.0     |
| % in PSD               | 25.8 ± 3.5%                | 12.1 ± 1.7%    |

|          | Spine copy number  | % of total protein | Molarity ( $\mu\text{M}$ ) | PSD copy number |
|----------|--------------------|--------------------|----------------------------|-----------------|
| Mushroom | $2343.6 \pm 322.1$ | $0.9 \pm 0.1\%$    | $29.8 \pm 4.1$             | $604 \pm 83.0$  |
| Stubby   | $3721.2 \pm 511.4$ | $1.3 \pm 0.2\%$    | $35.2 \pm 4.8$             | $451 \pm 62.0$  |

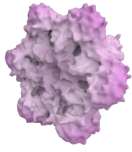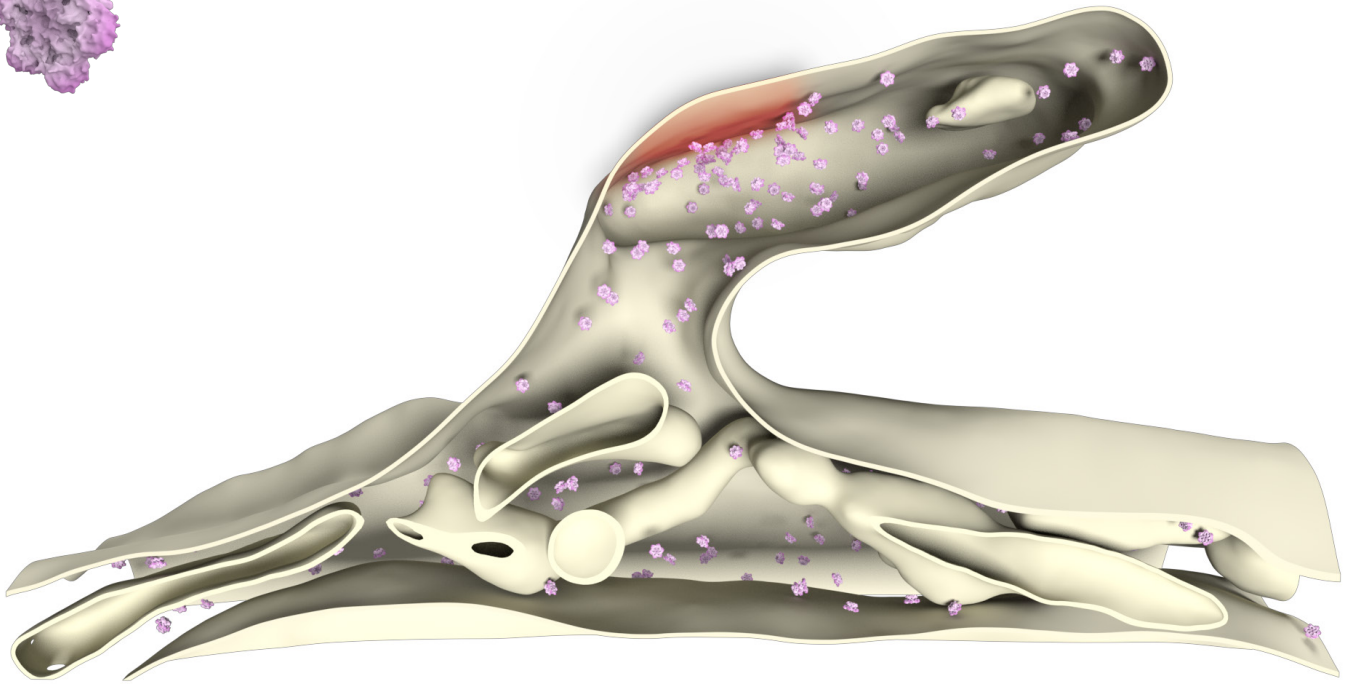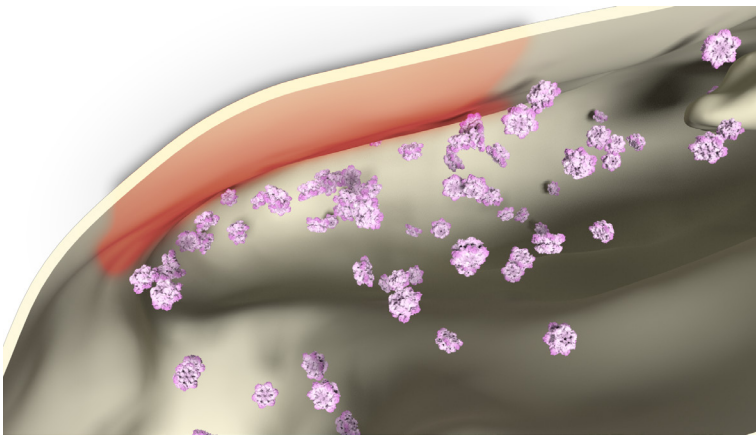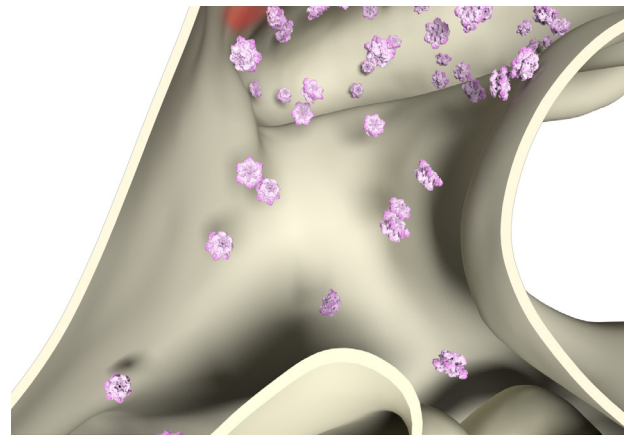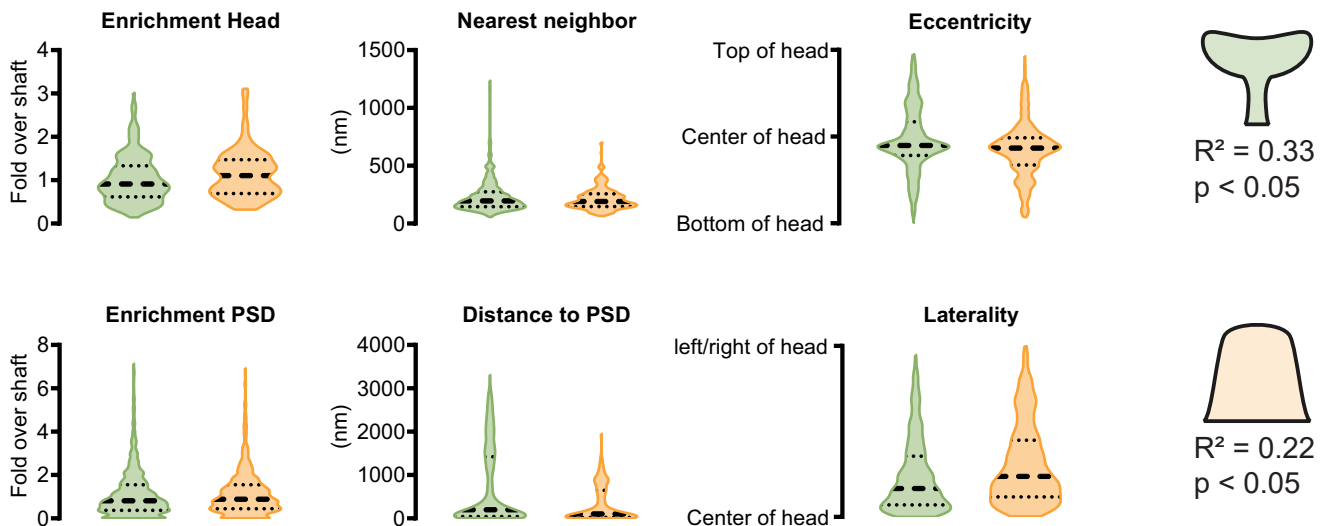

|          | Spine copy number  | % of total protein | Molarity ( $\mu\text{M}$ ) | PSD copy number |
|----------|--------------------|--------------------|----------------------------|-----------------|
| Mushroom | $2343.6 \pm 322.1$ | $0.9 \pm 0.1\%$    | $29.8 \pm 4.1$             | $604 \pm 83.0$  |
| Stubby   | $3721.2 \pm 511.4$ | $1.3 \pm 0.2\%$    | $35.2 \pm 4.8$             | $451 \pm 62.0$  |

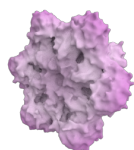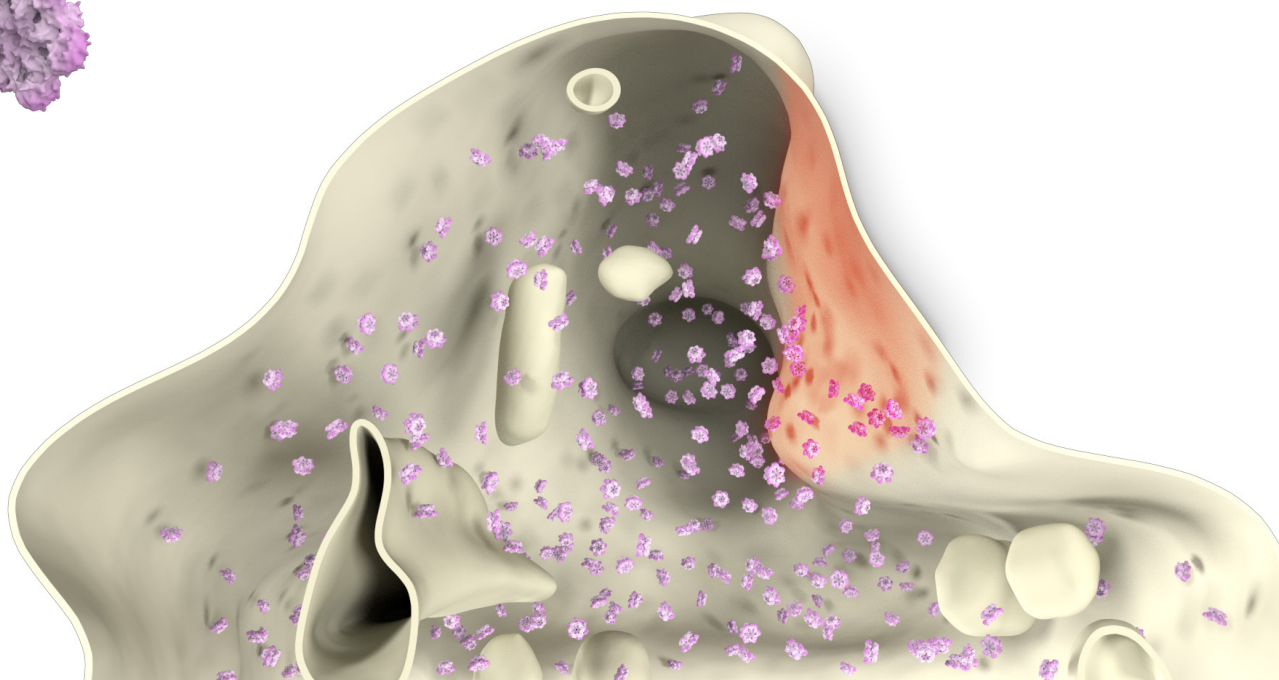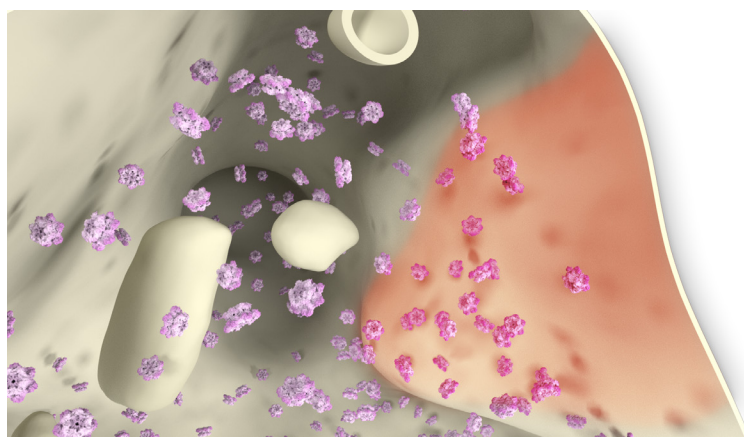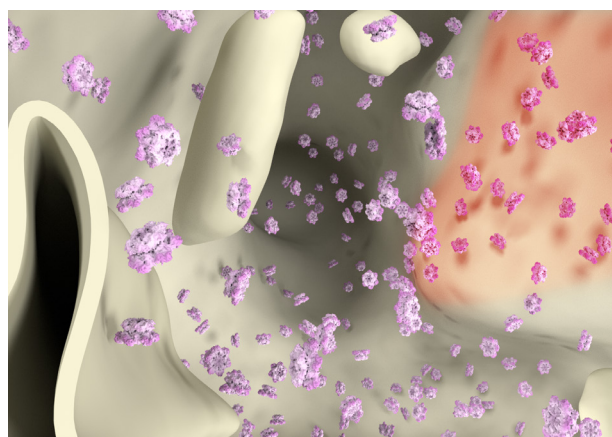

## References

**Antibody:** Synaptic Systems 132 002

**PDB Identifier:** 3j94

### Literature:

Block et al., 1988, Proc. Natl. Acad. Sci. U S A

Clary et al., 1990, Cell

Evers et al., 2010, Nat. Neurosci.

Hanson et al., 1995, J. Biol. Chem.

Hohl et al., 1998, Mol. Cell

Söllner et al., 1993a, Nature

Söllner et al., 1993b, Cell

Wilson et al., 1989, Nature



Parvalbumin (Genes: Pvalb, Uniprot ID: P02625)

Known function: Calcium buffer, involved in Alzheimer’s disease

Known organization: Cytosolic

Known Interactions: None

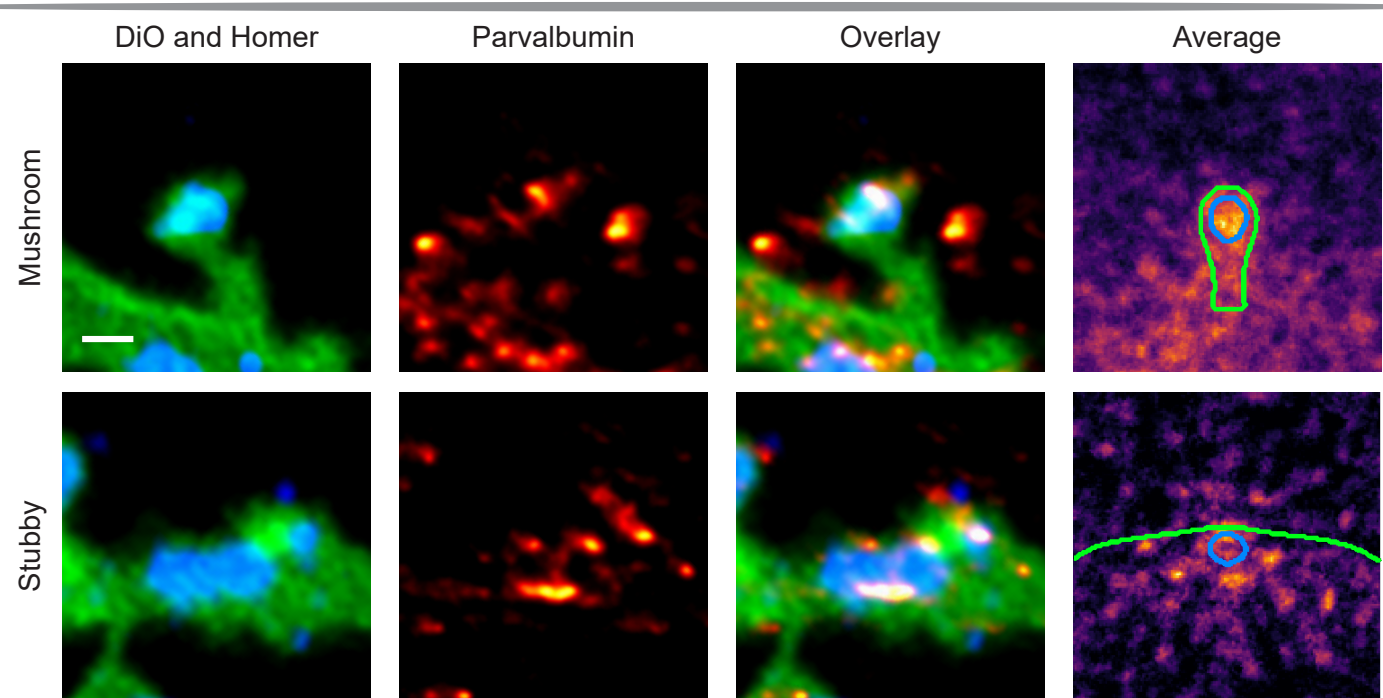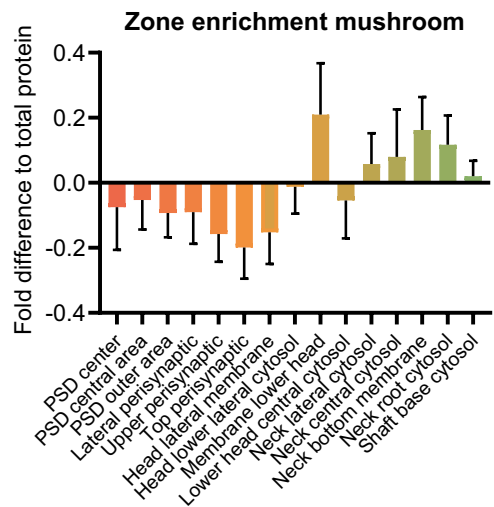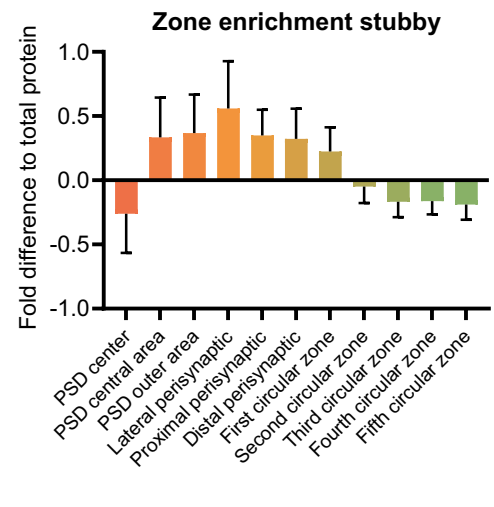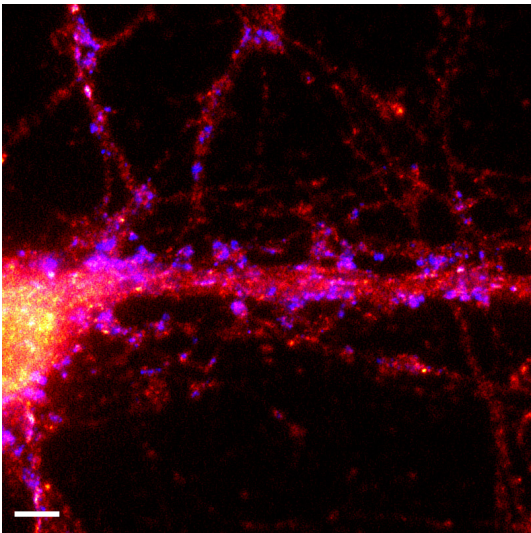

|                        |                            |              |
|------------------------|----------------------------|--------------|
| Whole cell copy number | 891723.7 ± 778526.3        |              |
| Spine copy number      | 74.5 ± 72.2                |              |
| Function               | SNAREs and assoc. proteins |              |
|                        | Mushroom                   | Stubby       |
| Spine copy number      | 65.1 ± 63.1                | 83.0 ± 80.5  |
| % of total protein     | 0.0 ± 0.0%                 | 0.0 ± 0.0%   |
| Molarity (µM)          | 0.8 ± 0.8                  | 0.8 ± 0.8    |
| PSD copy number        | 17 ± 16.5                  | 12 ± 11.6    |
| % in PSD               | 26.1 ± 25.3%               | 14.5 ± 14.0% |

|          | Spine copy number | % of total protein | Molarity ( $\mu\text{M}$ ) | PSD copy number |
|----------|-------------------|--------------------|----------------------------|-----------------|
| Mushroom | $65.1 \pm 63.1$   | $0.0 \pm 0.0\%$    | $0.8 \pm 0.8$              | $17 \pm 16.5$   |
| Stubby   | $83.0 \pm 80.5$   | $0.0 \pm 0.0\%$    | $0.8 \pm 0.8$              | $12 \pm 11.6$   |

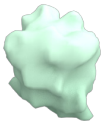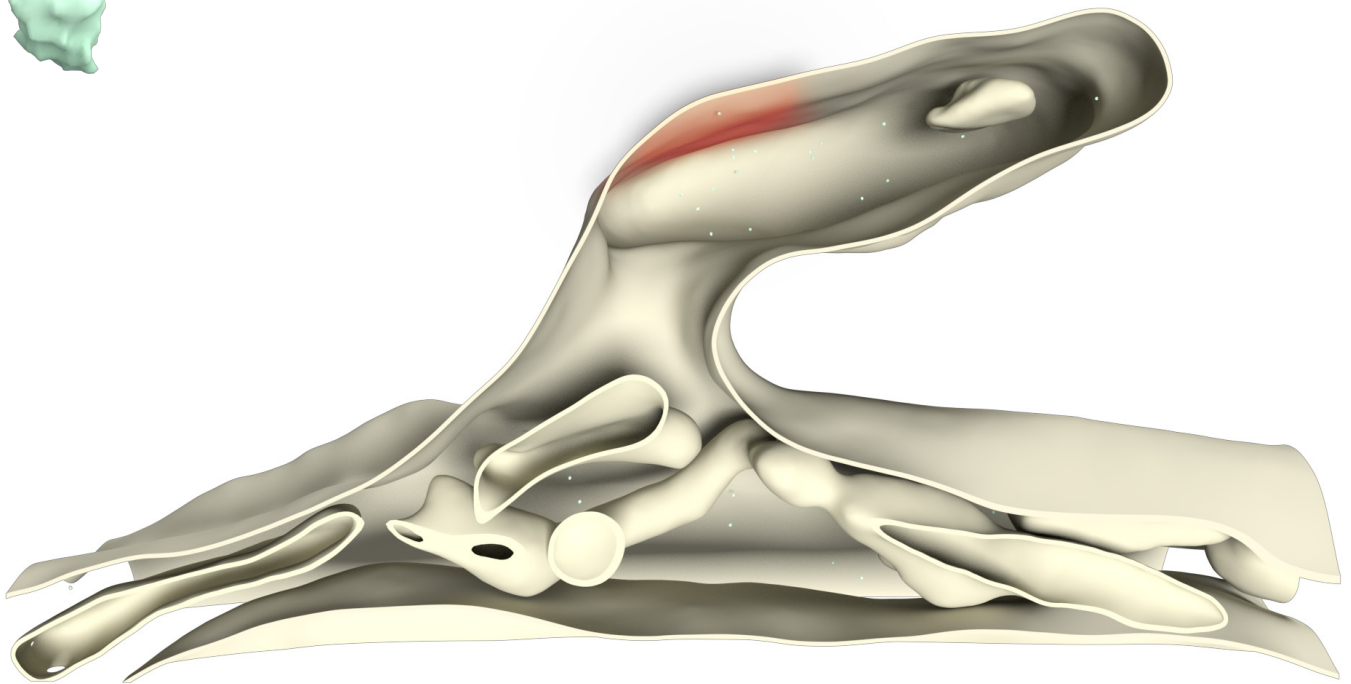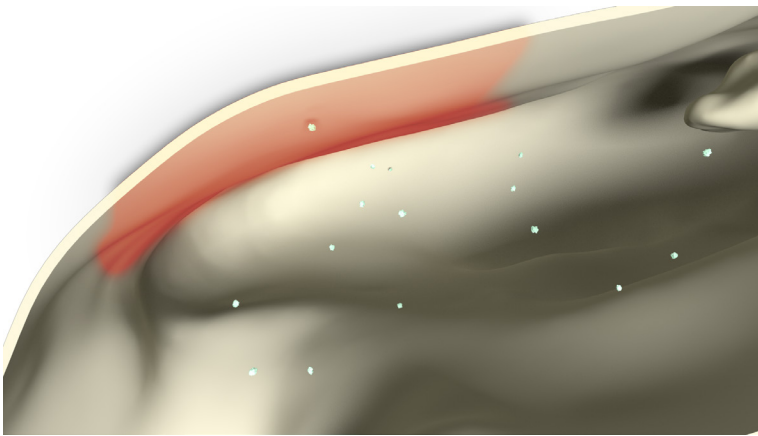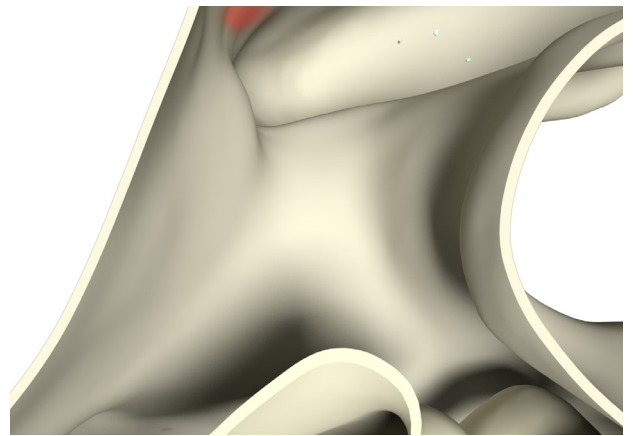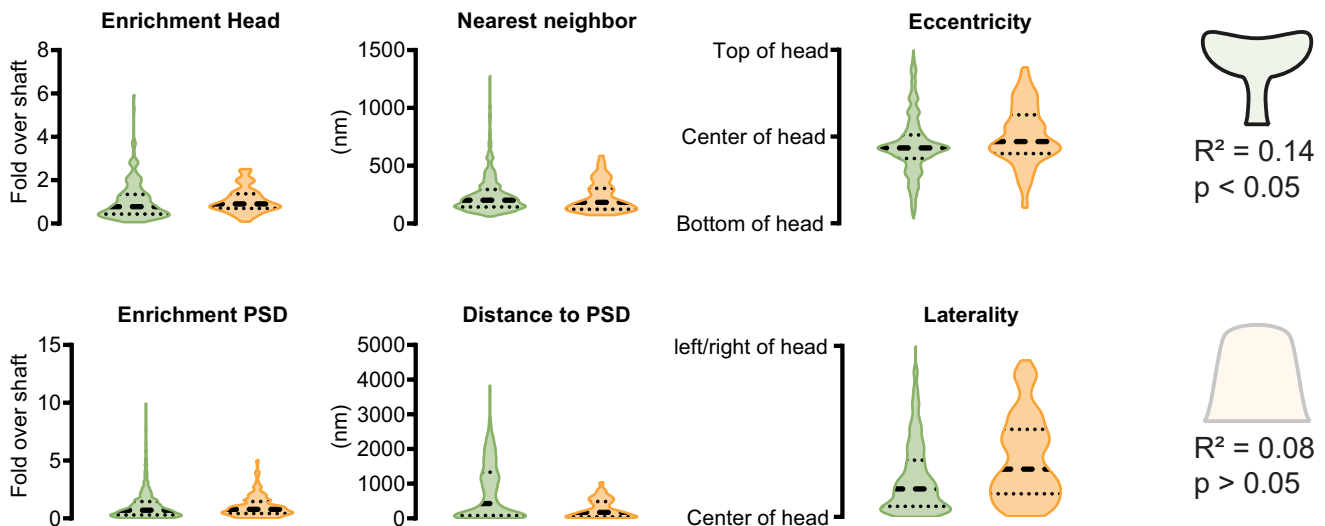

|          | Spine copy number | % of total protein | Molarity ( $\mu\text{M}$ ) | PSD copy number |
|----------|-------------------|--------------------|----------------------------|-----------------|
| Mushroom | $65.1 \pm 63.1$   | $0.0 \pm 0.0\%$    | $0.8 \pm 0.8$              | $17 \pm 16.5$   |
| Stubby   | $83.0 \pm 80.5$   | $0.0 \pm 0.0\%$    | $0.8 \pm 0.8$              | $12 \pm 11.6$   |

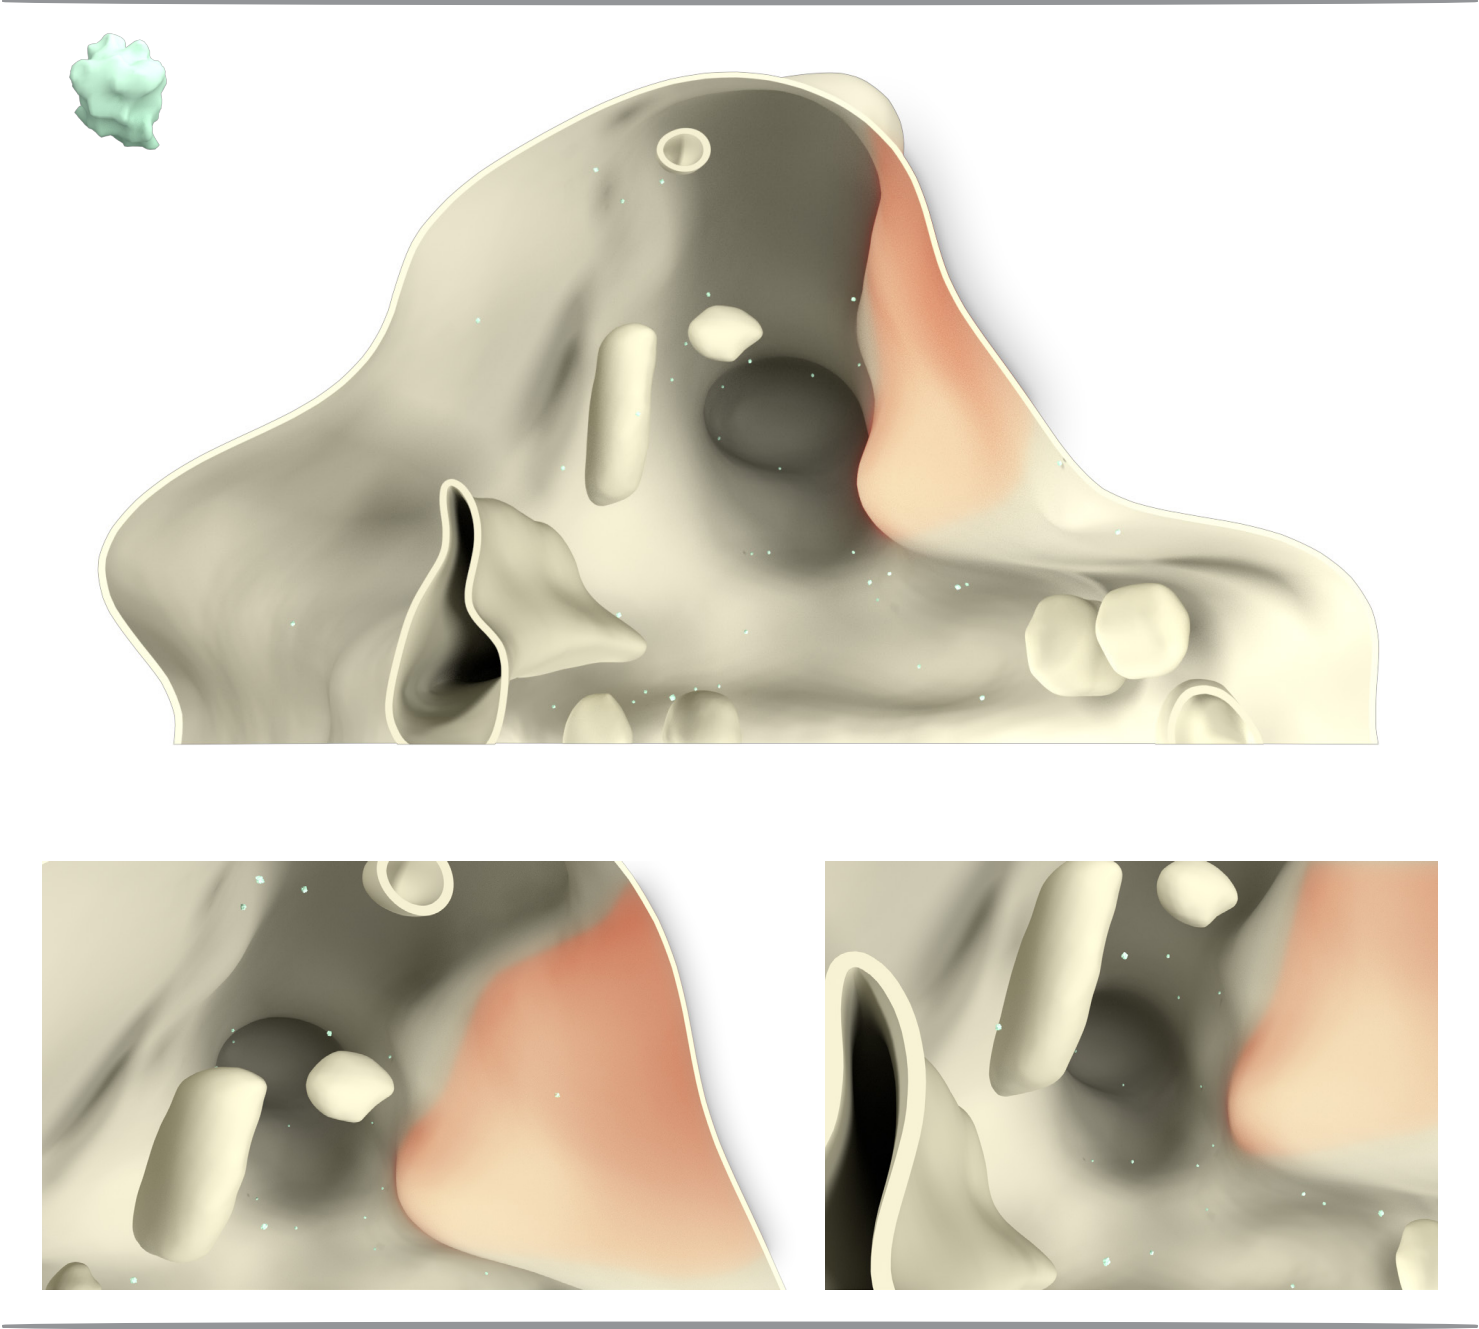

### References

**Antibody:** Swant PV25
**PDB Identifier:** 1rtp

**Literature:**

Cates et al., 2002, Biophys. J.

Klausberger et al., 2005, J. Neurosci.

Verret et al., 2012, Cell



## PSD93 (Dlg2, Chapsyn-110, Gene: Dlg2, Uniprot ID: Q63622)

**Known function:** Major organizer of the PSD

**Known organization:** Membrane-associated, Forms supercomplexes with other scaffolds, receptors and other proteins

**Known Interactions:** PSD95, NMDA receptors, nNOS, Kir2.1

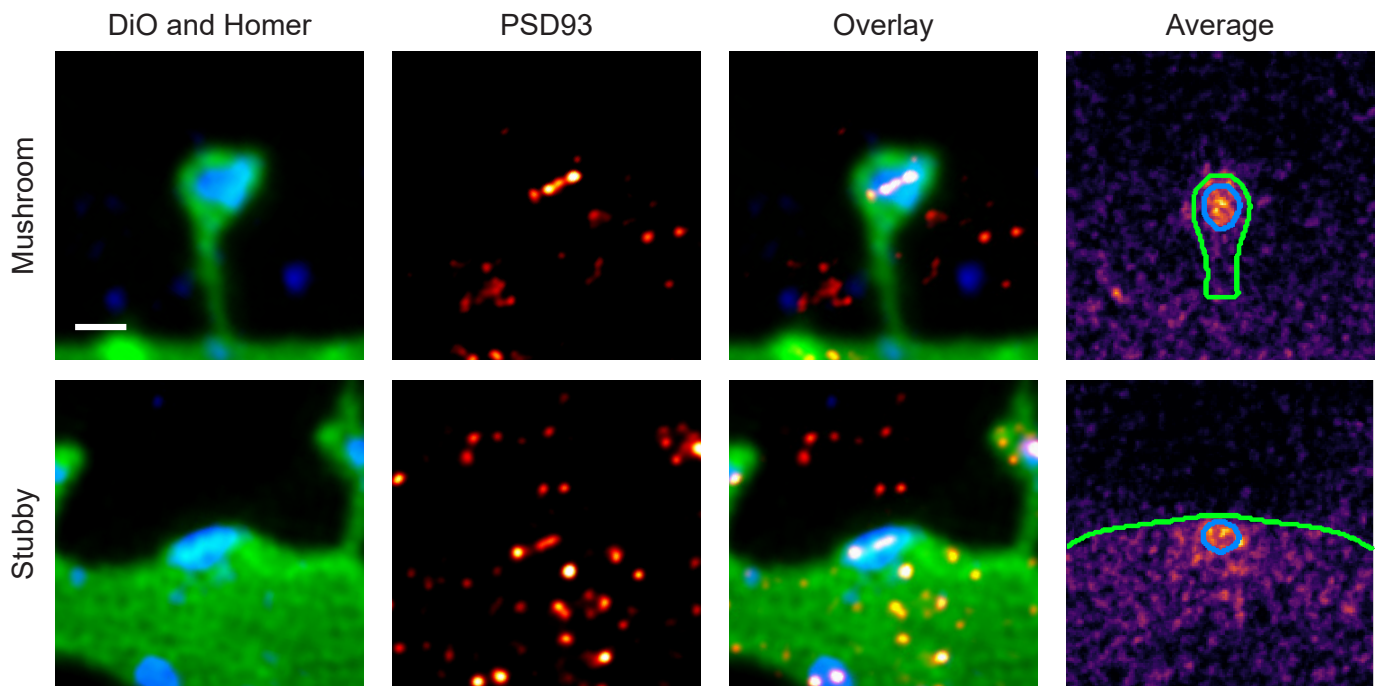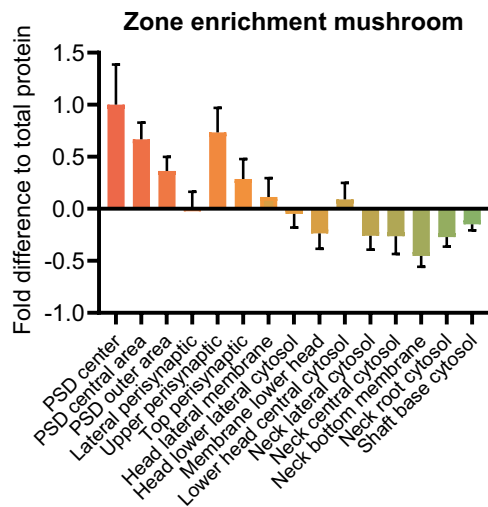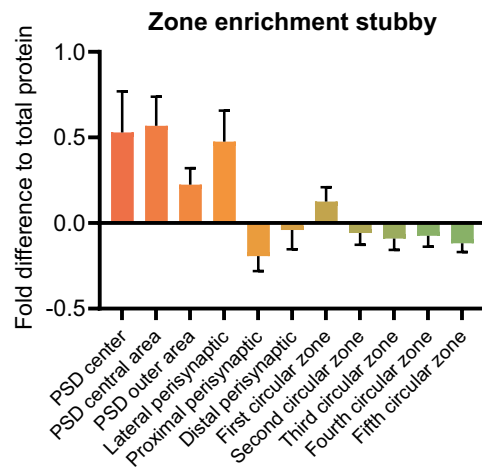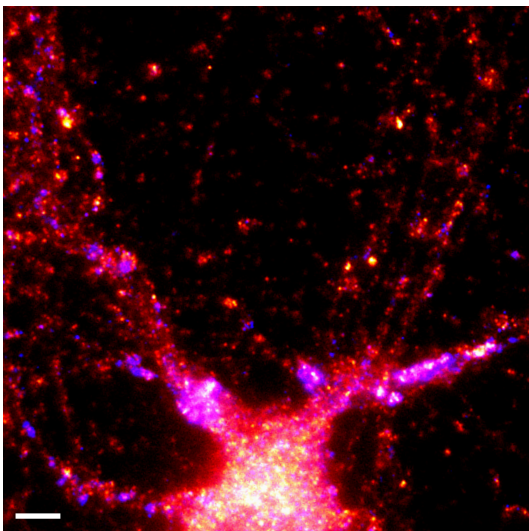

|                        |                    |              |
|------------------------|--------------------|--------------|
| Whole cell copy number | 765847.1 ± 25826.4 |              |
| Spine copy number      | 255.8 ± 23.6       |              |
| Function               | PSD scaffolds      |              |
|                        | Mushroom           | Stubby       |
| Spine copy number      | 220.7 ± 20.4       | 318.7 ± 29.4 |
| % of total protein     | 0.1 ± 0.0%         | 0.1 ± 0.0%   |
| Molarity (μM)          | 2.8 ± 0.3          | 3.0 ± 0.3    |
| PSD copy number        | 72 ± 6.7           | 88 ± 8.1     |
| % in PSD               | 32.6 ± 3.0%        | 27.6 ± 2.6%  |

|          | Spine copy number | % of total protein | Molarity ( $\mu\text{M}$ ) | PSD copy number |
|----------|-------------------|--------------------|----------------------------|-----------------|
| Mushroom | $220.7 \pm 20.4$  | $0.1 \pm 0.0\%$    | $2.8 \pm 0.3$              | $72 \pm 6.7$    |
| Stubby   | $318.7 \pm 29.4$  | $0.1 \pm 0.0\%$    | $3.0 \pm 0.3$              | $88 \pm 8.1$    |

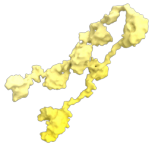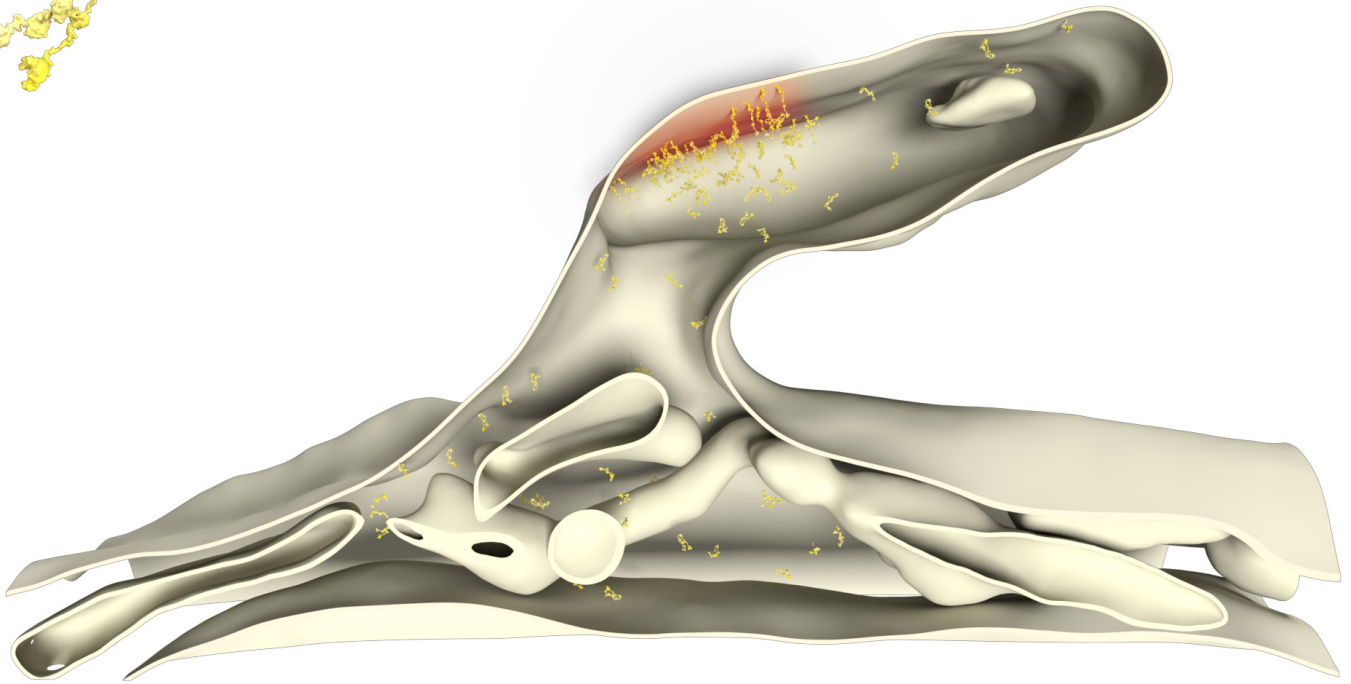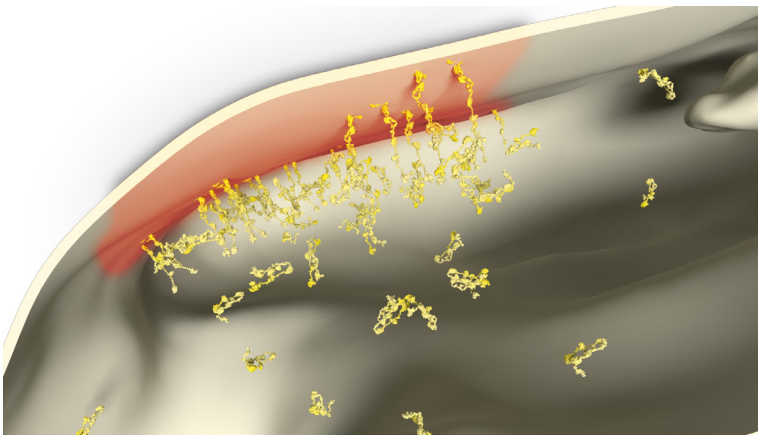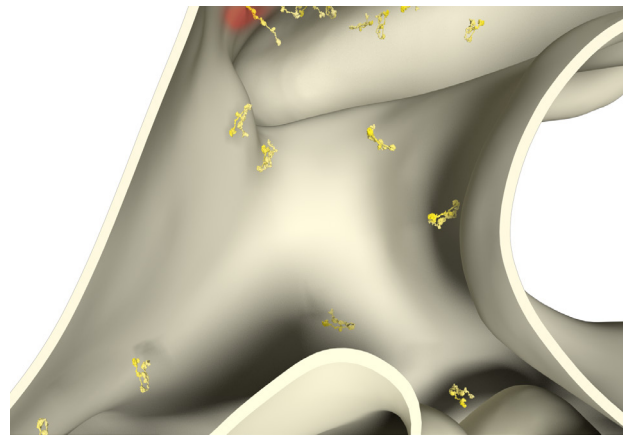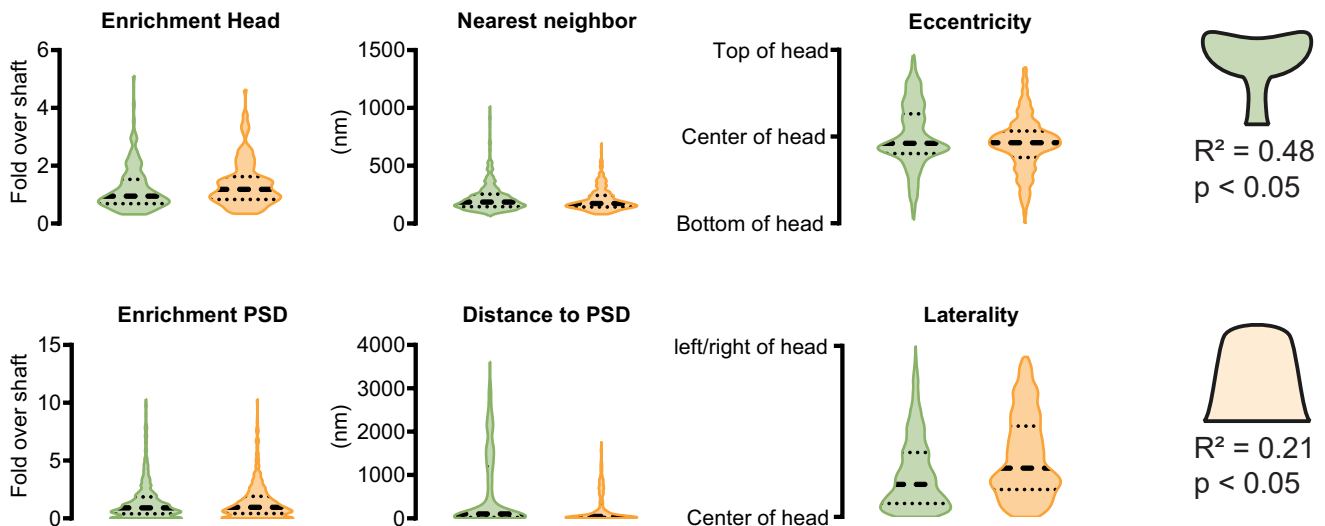

|          | Spine copy number | % of total protein | Molarity ( $\mu\text{M}$ ) | PSD copy number |
|----------|-------------------|--------------------|----------------------------|-----------------|
| Mushroom | $220.7 \pm 20.4$  | $0.1 \pm 0.0\%$    | $2.8 \pm 0.3$              | $72 \pm 6.7$    |
| Stubby   | $318.7 \pm 29.4$  | $0.1 \pm 0.0\%$    | $3.0 \pm 0.3$              | $88 \pm 8.1$    |

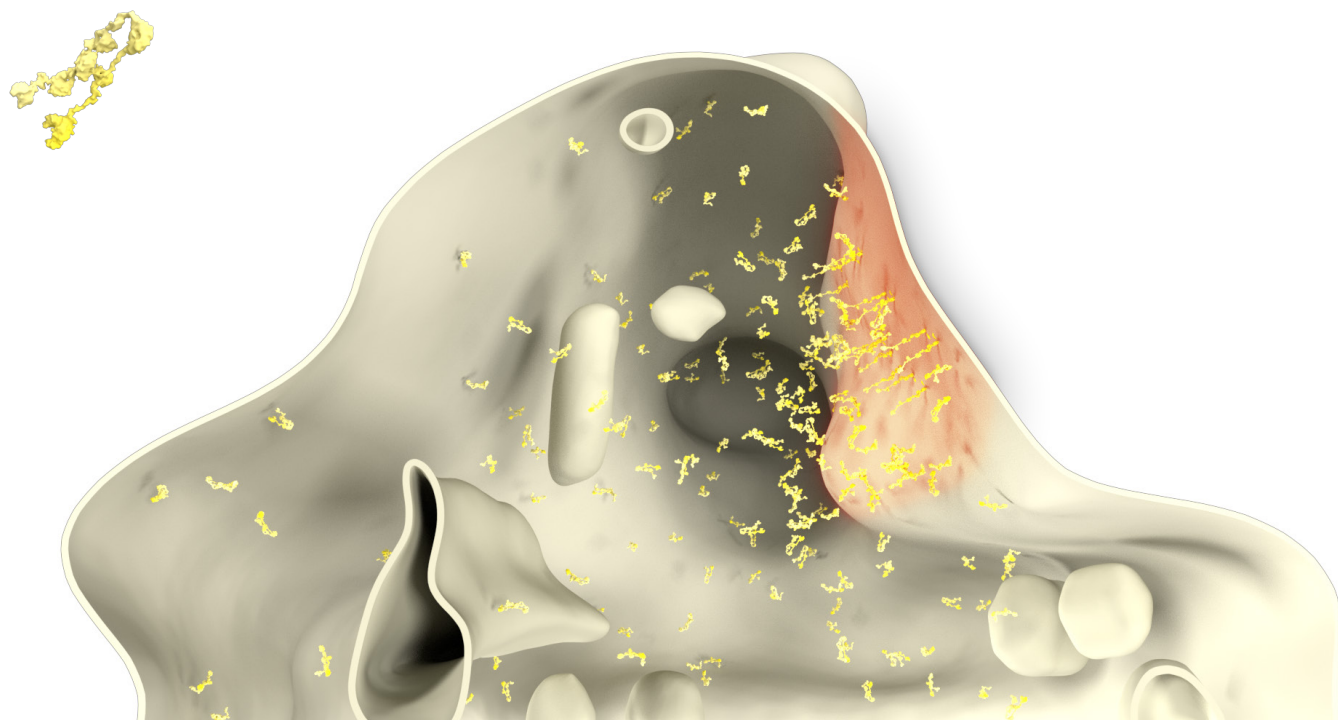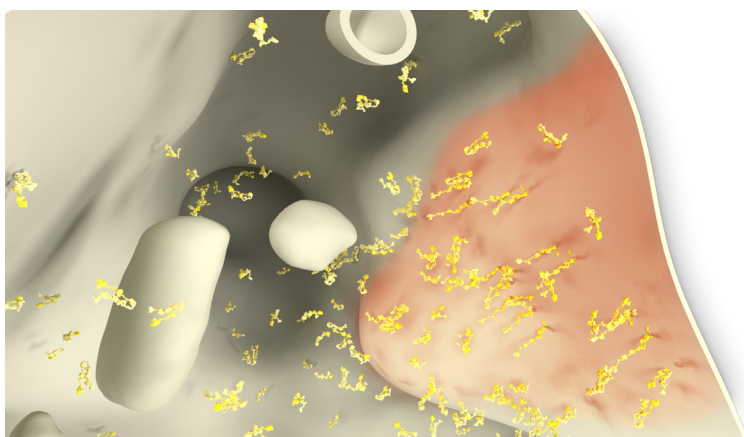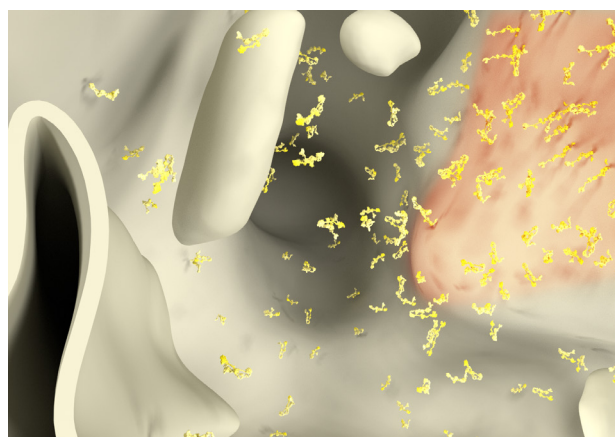

## References

**Antibody:** Invitrogen 34-4700

**PDB Identifier:** 2wl7

### Literature:

Brenman et al., 1996a, J. Neurosci.

Dakoji et al., 2003, Neuropharmacology

Frank et al., 2016, Nat. Commun.

Leyland and Dart, 2004, J. Biol. Chem.

Niethammer et al., 1996, J. Neurosci.

Parker, 2004, J. Neurosci.



## PSD95 (Dlg4, Sap90, Gene: Dlg4, Uniprot ID: P31016)

**Known function:** Major organizer of the PSD

**Known organization:** Membrane-associated and cytosolic, Forms supercomplexes with other scaffolds, receptors and other proteins, Forms Nanodomains

**Known Interactions:** PSD93, NMDA receptors, nNOS, Potassium channels

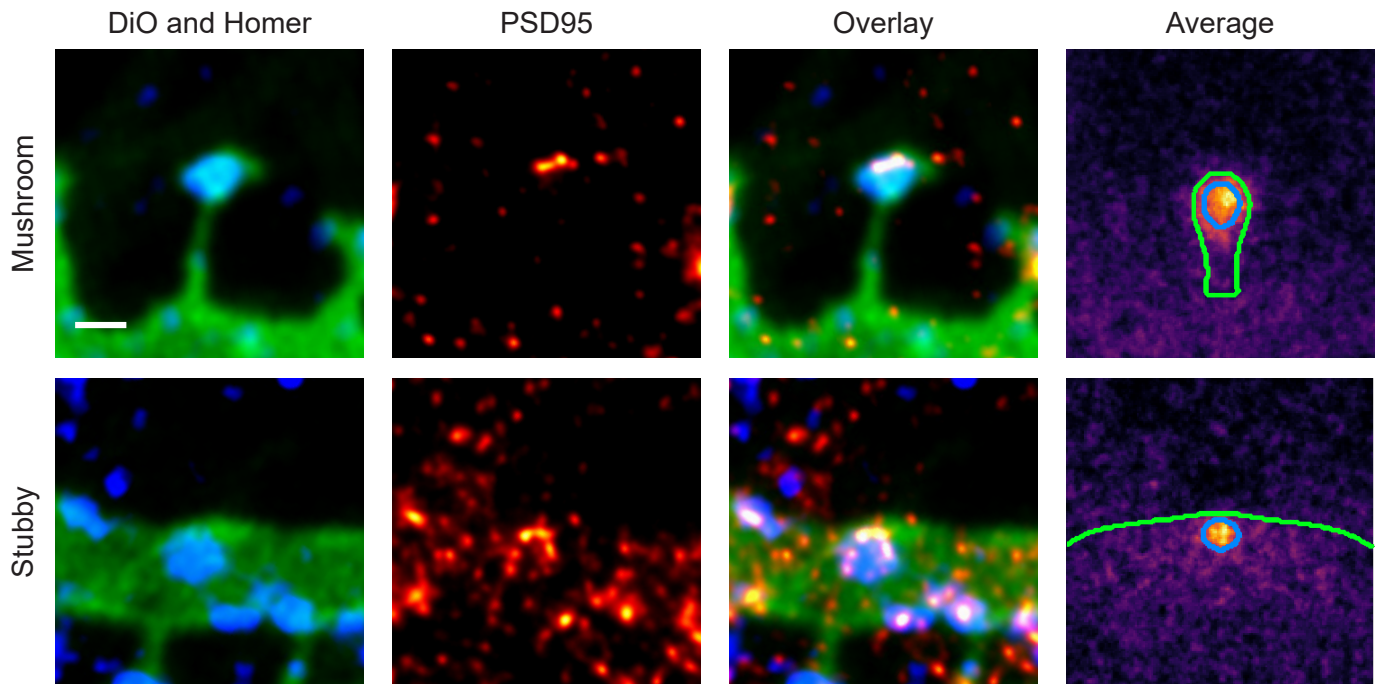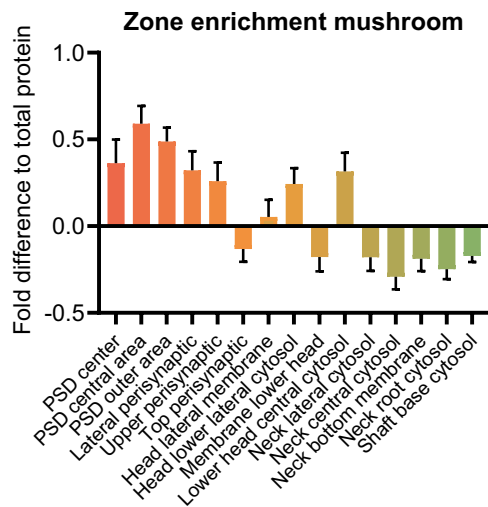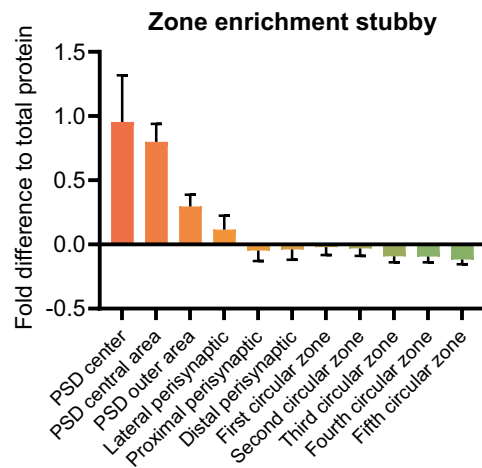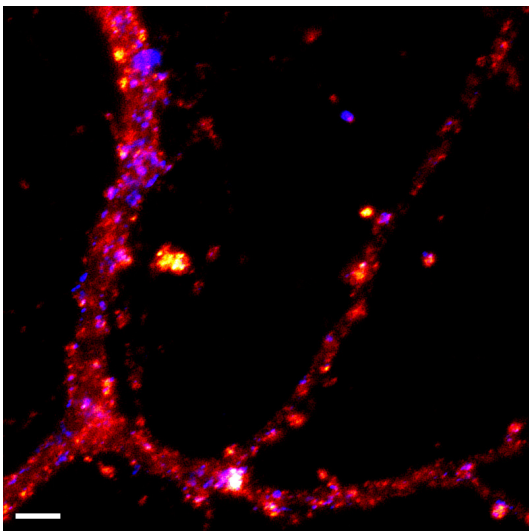

|                        |                      |              |
|------------------------|----------------------|--------------|
| Whole cell copy number | 1149048.0 ± 116158.6 |              |
| Spine copy number      | 525.2 ± 76.7         |              |
| Function               | PSD scaffolds        |              |
|                        | Mushroom             | Stubby       |
| Spine copy number      | 550.3 ± 80.4         | 539.1 ± 78.8 |
| % of total protein     | 0.2 ± 0.0%           | 0.2 ± 0.0%   |
| Molarity (μM)          | 7.0 ± 1.0            | 5.1 ± 0.7    |
| PSD copy number        | 240 ± 35.1           | 261 ± 38.1   |
| % in PSD               | 43.6 ± 6.4%          | 48.4 ± 7.1%  |

|          | Spine copy number | % of total protein | Molarity ( $\mu\text{M}$ ) | PSD copy number |
|----------|-------------------|--------------------|----------------------------|-----------------|
| Mushroom | $550.3 \pm 80.4$  | $0.2 \pm 0.0\%$    | $7.0 \pm 1.0$              | $240 \pm 35.1$  |
| Stubby   | $539.1 \pm 78.8$  | $0.2 \pm 0.0\%$    | $5.1 \pm 0.7$              | $261 \pm 38.1$  |

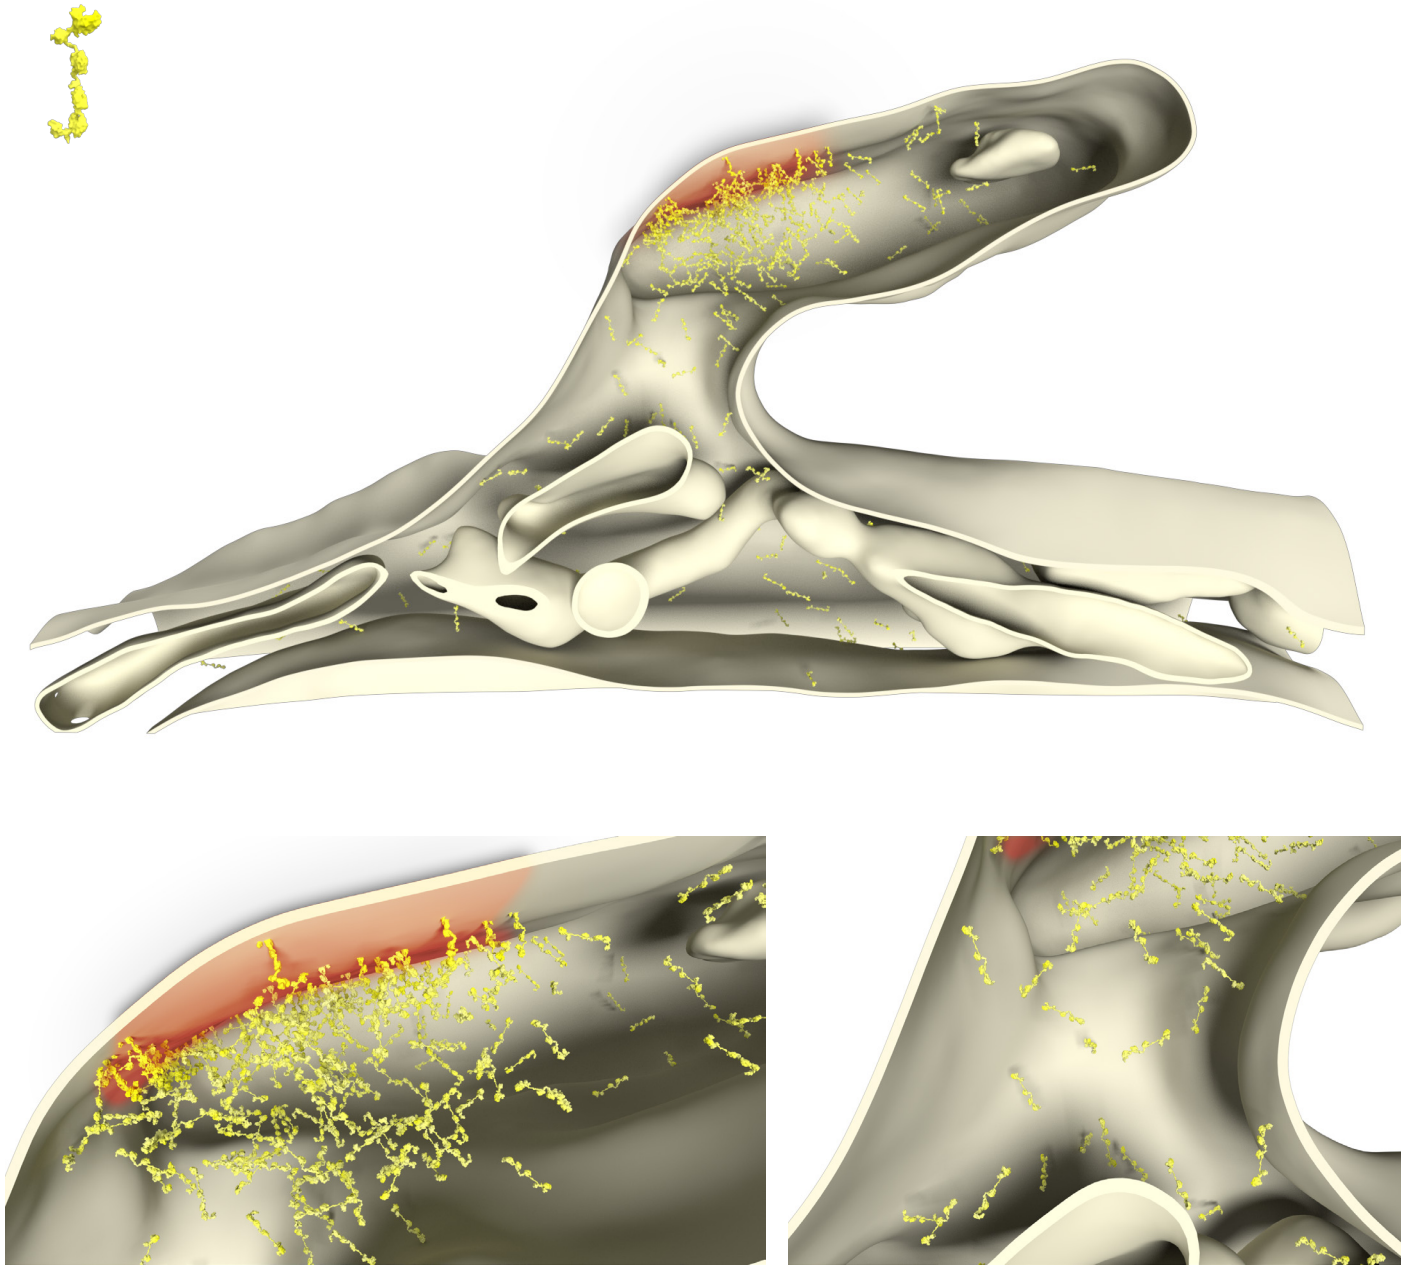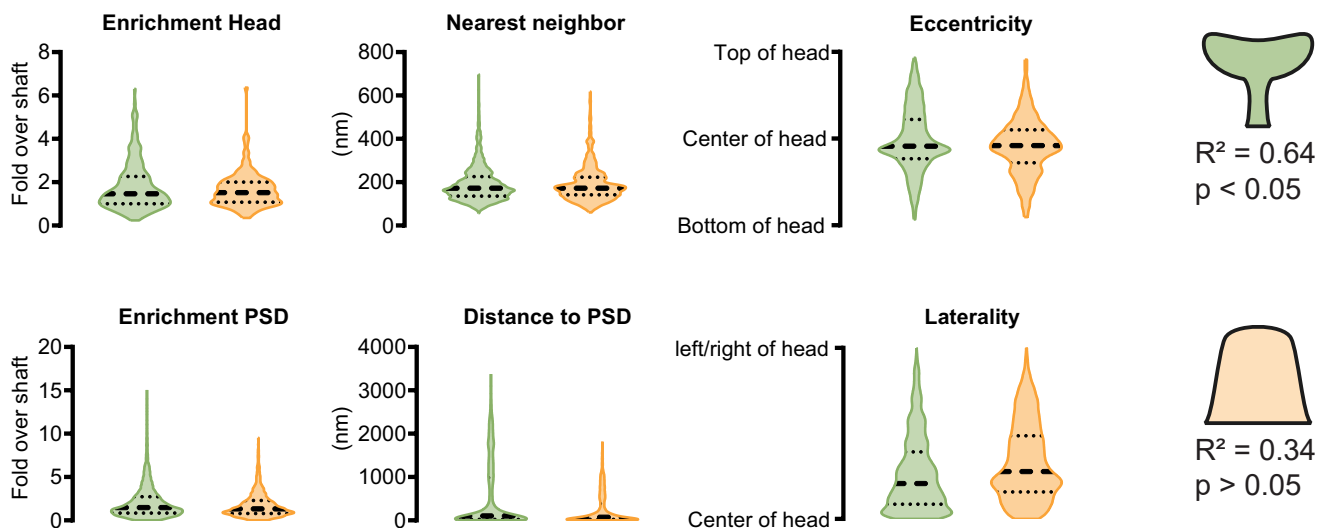

|          | Spine copy number | % of total protein | Molarity ( $\mu\text{M}$ ) | PSD copy number |
|----------|-------------------|--------------------|----------------------------|-----------------|
| Mushroom | $550.3 \pm 80.4$  | $0.2 \pm 0.0\%$    | $7.0 \pm 1.0$              | $240 \pm 35.1$  |
| Stubby   | $539.1 \pm 78.8$  | $0.2 \pm 0.0\%$    | $5.1 \pm 0.7$              | $261 \pm 38.1$  |

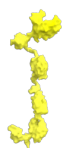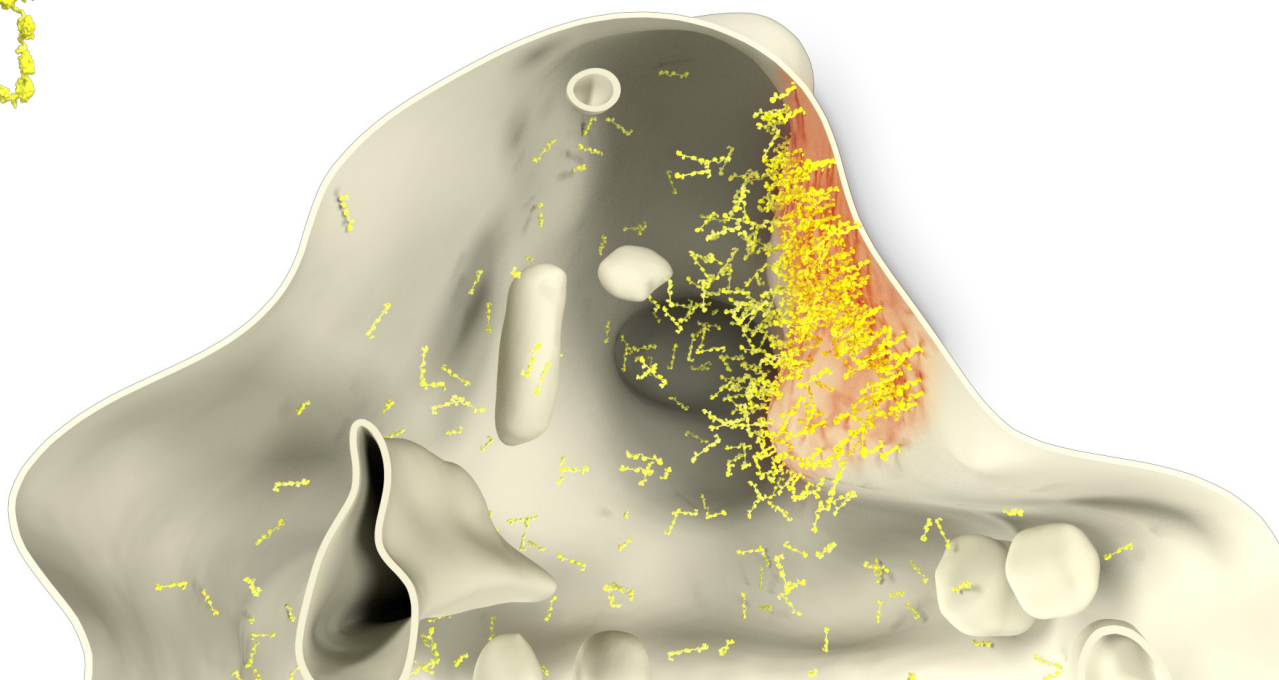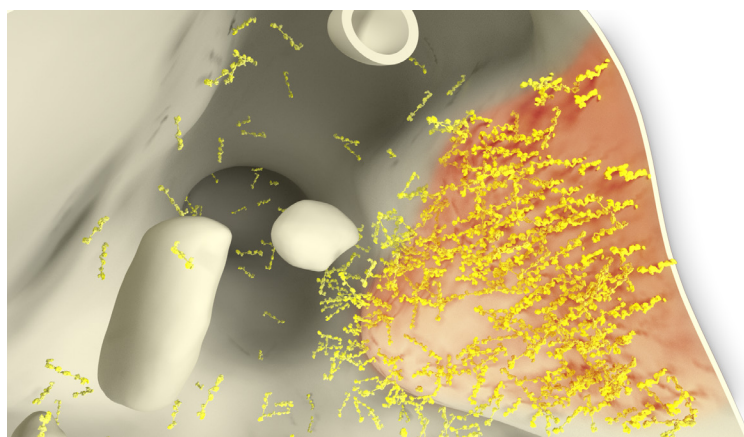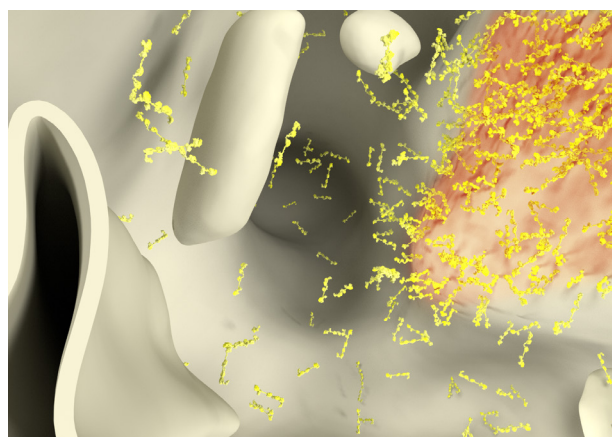

## References

**Antibody:** Cell Signaling 3450

**PDB Identifier:** 2xkx, 5jxb

### Literature:

Bhattacharyya et al., 2009, Na. Neurosci.

Broadhead et al., 2016, Sci. Rep.

Dani et al., 2010, Neuron

Frank et al., 2017, J. Neurochem.

Garner et al., 2000, J. Neurochem.

Hruska et al., 2018, Nat. Neurosci.

Inagaki et al., 2001, J. Biol. Chem.

Kim et al., 1997, J. Cell. Biol.

MacGillavry et al., 2013, Neuron

Nair et al., 2013, J. Neurosci.

Niethammer et al., 1996, J. Neurosci.

Schultze et al., 2001, J. Neurochem.

Sheng and Sala, 2001, Annu. Rev. Neurosci.

Takeuchi et al., 1997, J. Biol. Chem.

Tang et al., 2016, Nature



**Rab3 (Gene: Rab3a, Uniprot ID: P63012)**

**Known function:** SV and neuroendocrine exocytosis  
**Known organization:** Membrane-associated and cytosolic  
**Known Interactions:** None

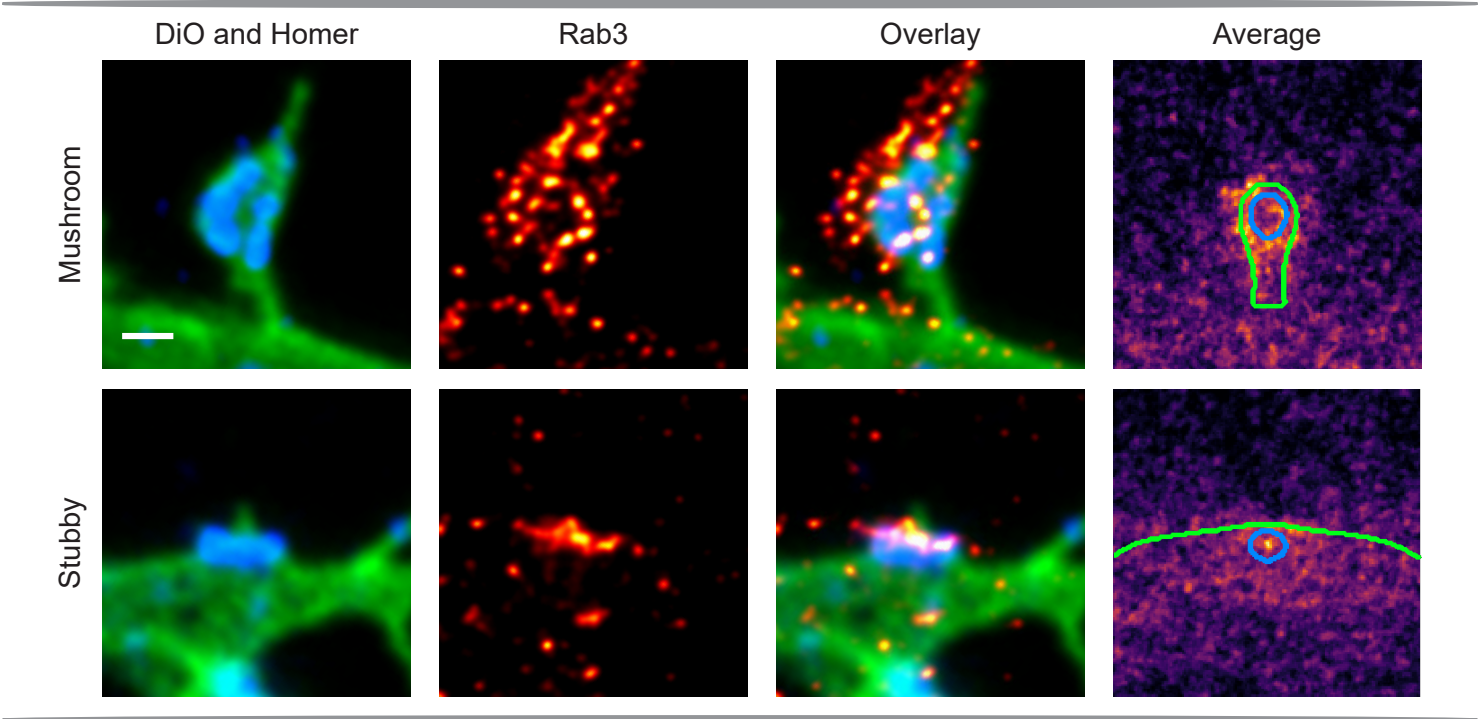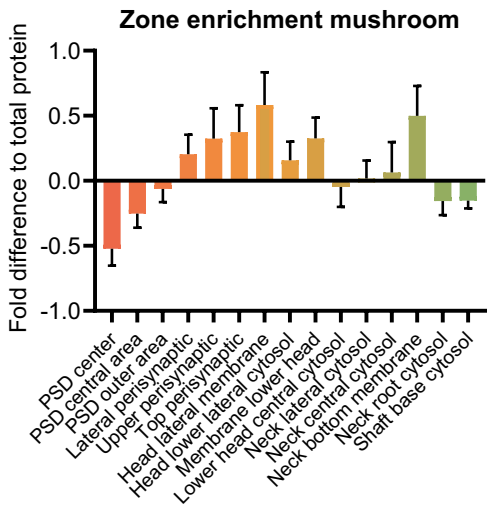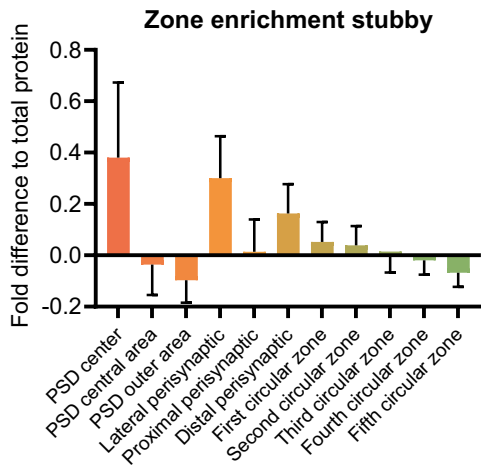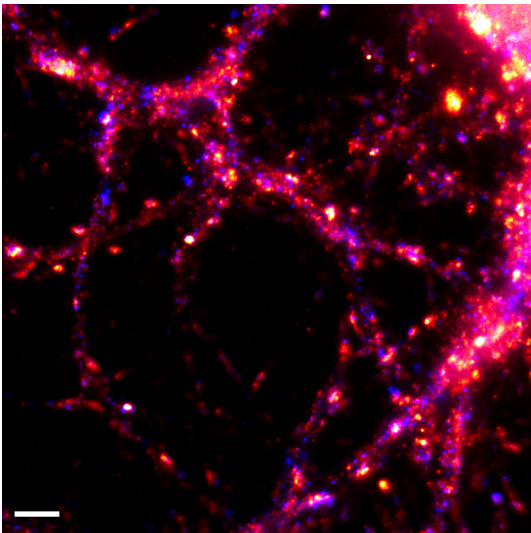

|                        |                            |                 |
|------------------------|----------------------------|-----------------|
| Whole cell copy number | 54783683.8 ± 2509720.8     |                 |
| Spine copy number      | 7270.0 ± 2572.7            |                 |
| Function               | Exo-/Endocytosis cofactors |                 |
|                        | Mushroom                   | Stubby          |
| Spine copy number      | 7012.6 ± 2481.6            | 8139.6 ± 2880.5 |
| % of total protein     | 0.9 ± 0.3%                 | 0.9 ± 0.3%      |
| Molarity (μM)          | 89.1 ± 31.5                | 76.9 ± 27.2     |
| PSD copy number        | 543 ± 192.2                | 954 ± 337.6     |
| % in PSD               | 7.7 ± 2.7%                 | 11.7 ± 4.1%     |

|          | Spine copy number   | % of total protein | Molarity ( $\mu\text{M}$ ) | PSD copy number |
|----------|---------------------|--------------------|----------------------------|-----------------|
| Mushroom | $7012.6 \pm 2481.6$ | $0.9 \pm 0.3\%$    | $89.1 \pm 31.5$            | $543 \pm 192.2$ |
| Stubby   | $8139.6 \pm 2880.5$ | $0.9 \pm 0.3\%$    | $76.9 \pm 27.2$            | $954 \pm 337.6$ |

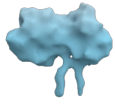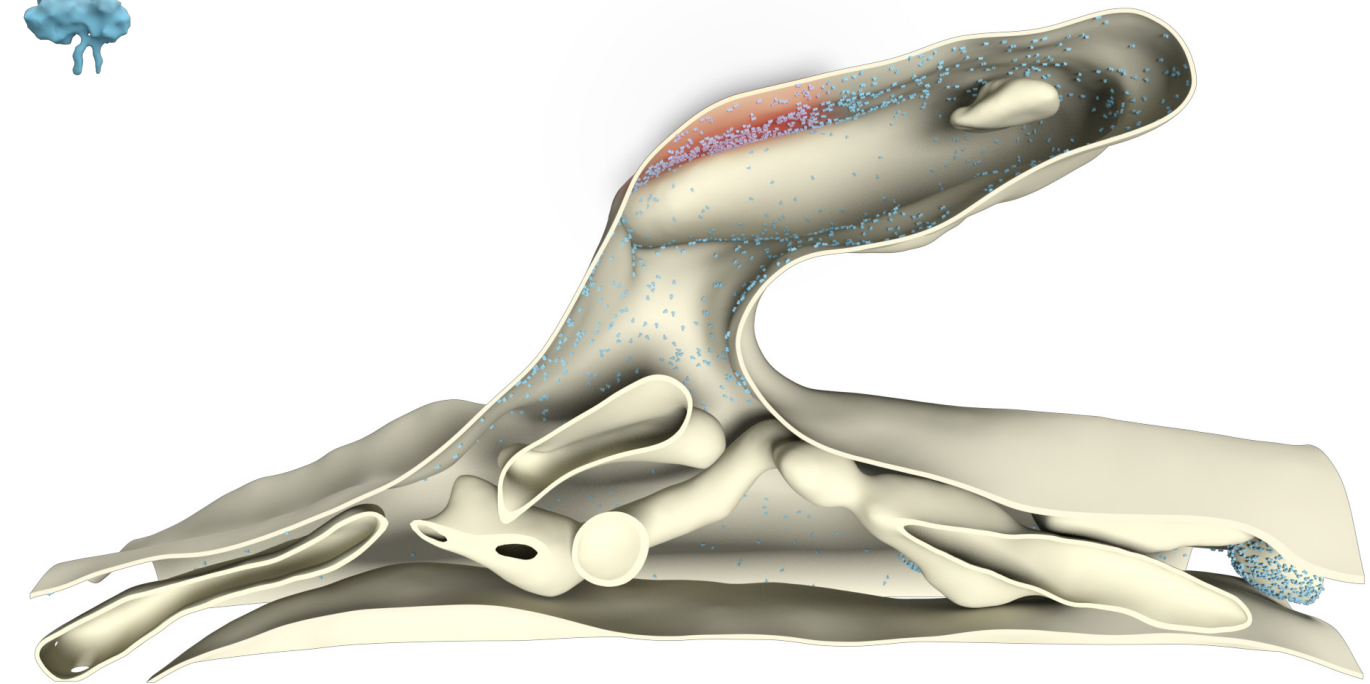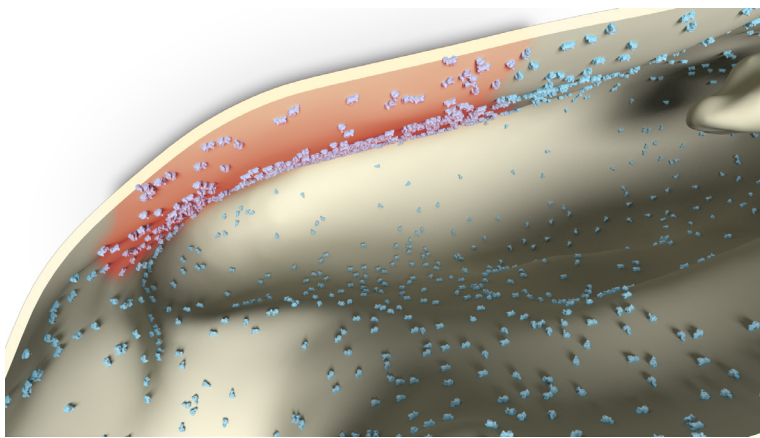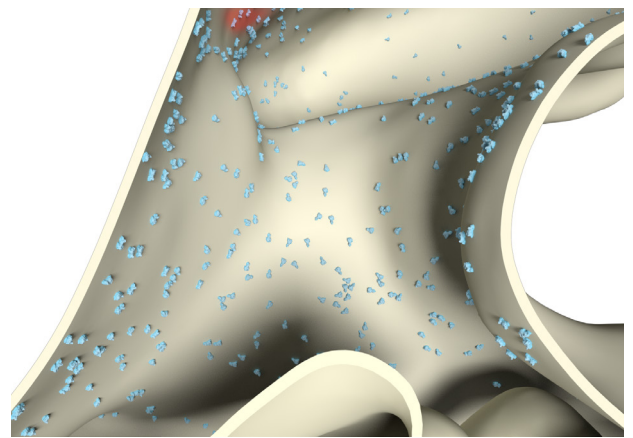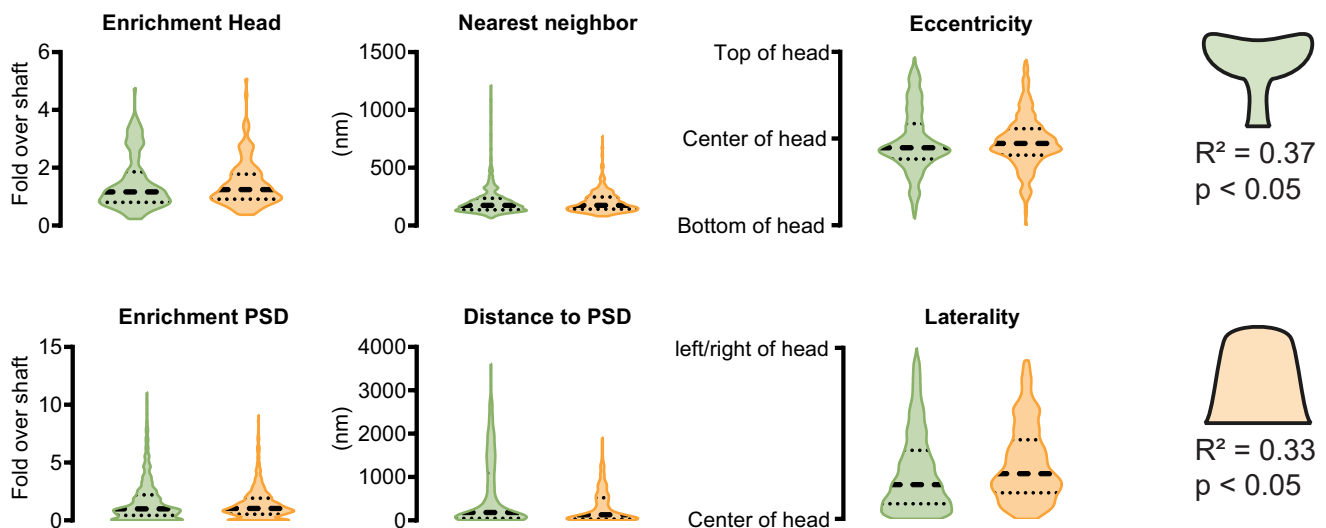

|          | Spine copy number   | % of total protein | Molarity ( $\mu\text{M}$ ) | PSD copy number |
|----------|---------------------|--------------------|----------------------------|-----------------|
| Mushroom | $7012.6 \pm 2481.6$ | $0.9 \pm 0.3\%$    | $89.1 \pm 31.5$            | $543 \pm 192.2$ |
| Stubby   | $8139.6 \pm 2880.5$ | $0.9 \pm 0.3\%$    | $76.9 \pm 27.2$            | $954 \pm 337.6$ |

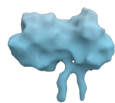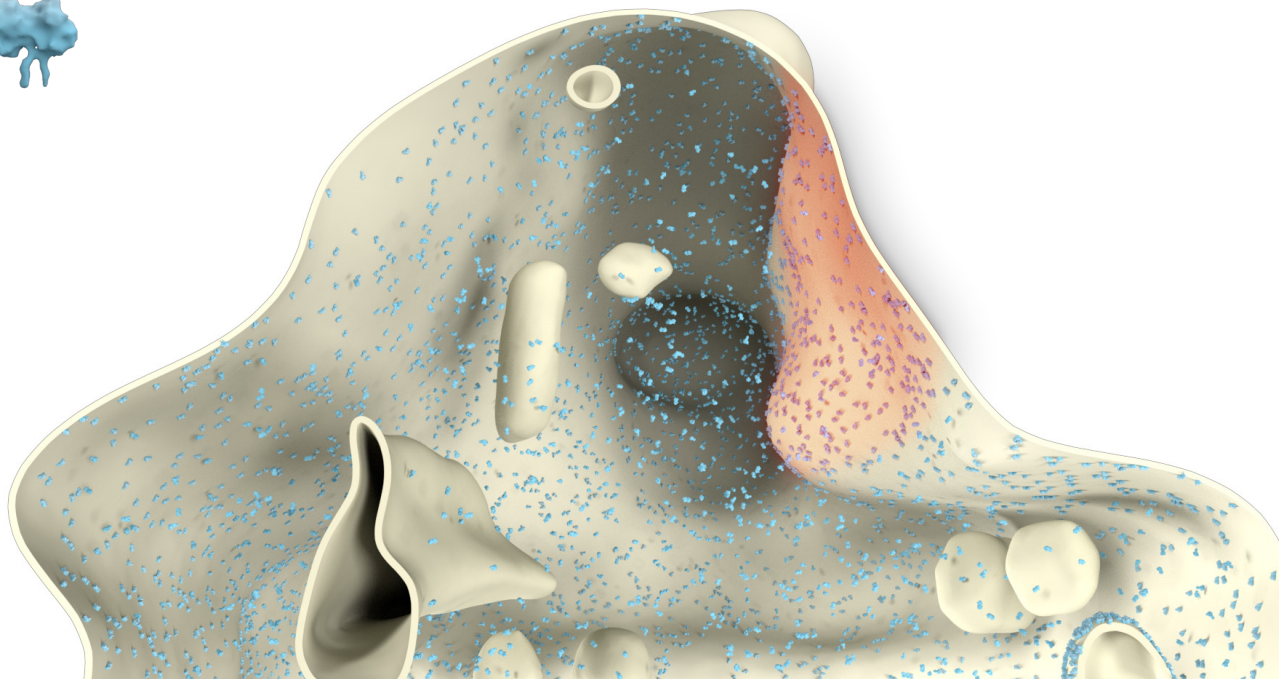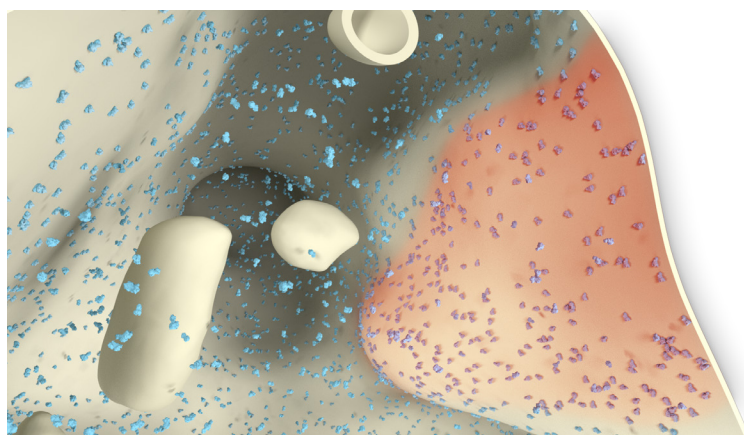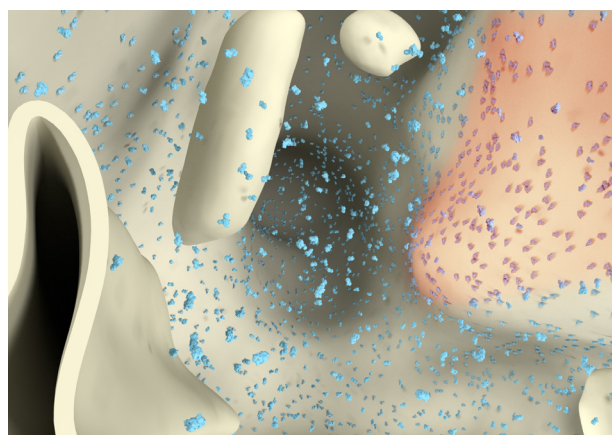

## References

**Antibody:** BD Biosciences 610379

**PDB Identifier:** 3rab

### Literature:

Fischer von Mollard et al., 1990, Proc. Natl. Acad. Sci. U S A

Schlüter et al., 2002, J. Biol. Chem.

von Mollard et al., 1991, Nature



## Rab4 (Gene: Rab4a, Uniprot ID: P05714)

**Known function:** Early/recycling endosomes to PM traffick, Basal AMPAR recycling

**Known organization:** Membrane-associated and cytosolic

**Known Interactions:** None

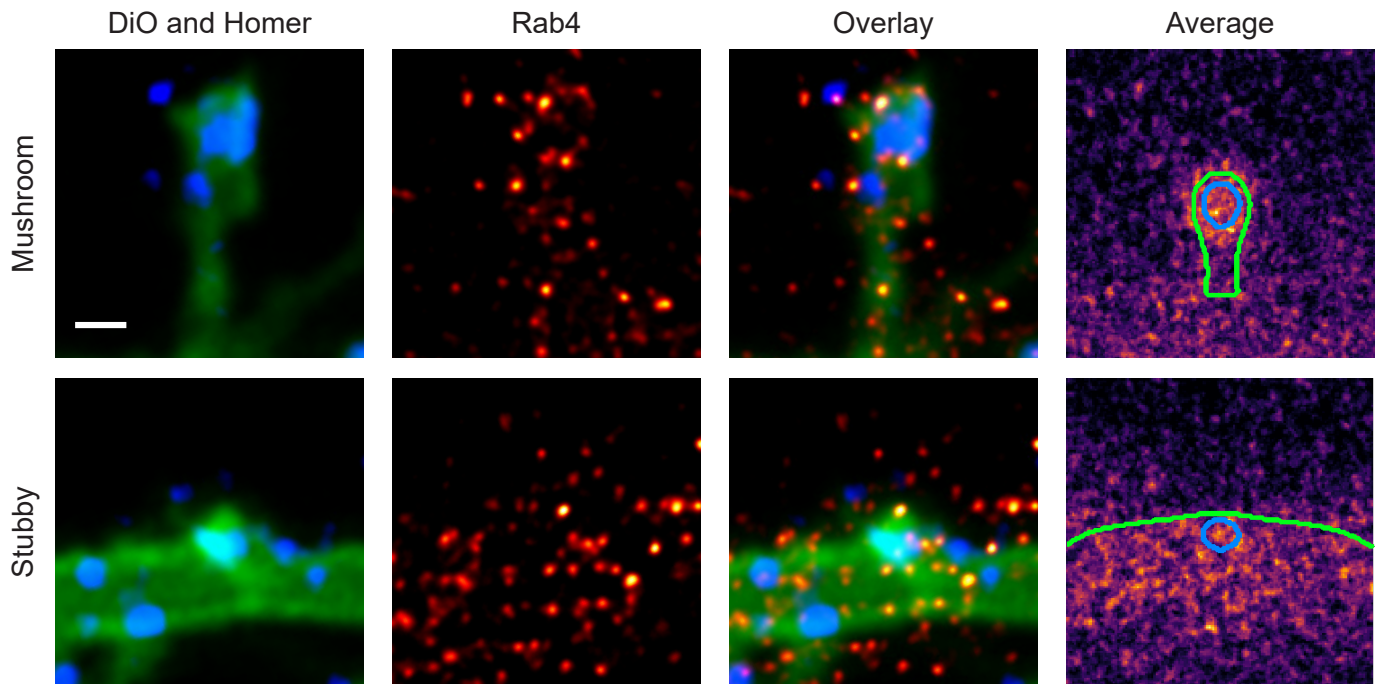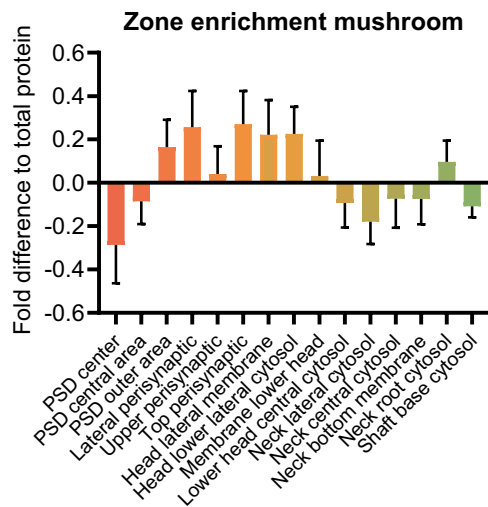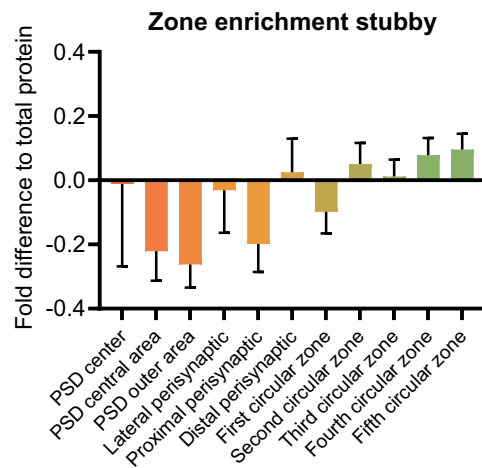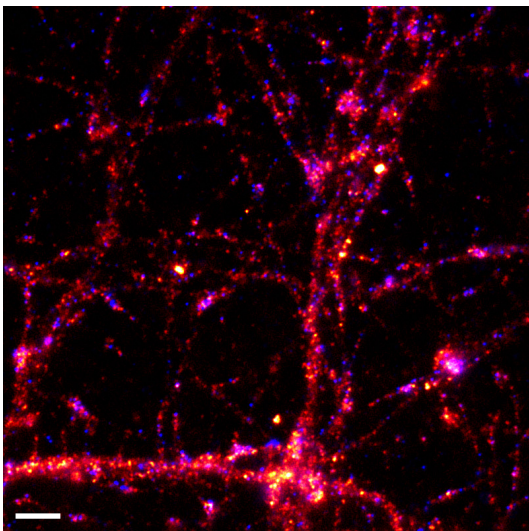

|                        |                            |              |
|------------------------|----------------------------|--------------|
| Whole cell copy number | 2359845.6 ± 220211.7       |              |
| Spine copy number      | 212.8 ± 55.2               |              |
| Function               | Exo-/Endocytosis cofactors |              |
|                        | Mushroom                   | Stubby       |
| Spine copy number      | 197.2 ± 51.2               | 233.3 ± 60.5 |
| % of total protein     | 0.0 ± 0.0%                 | 0.0 ± 0.0%   |
| Molarity (μM)          | 2.5 ± 0.6                  | 2.2 ± 0.6    |
| PSD copy number        | 10 ± 0.6                   | 14 ± 3.6     |
| % in PSD               | 5.1 ± 1.3%                 | 6.0 ± 1.6%   |

|          | Spine copy number | % of total protein | Molarity ( $\mu\text{M}$ ) | PSD copy number |
|----------|-------------------|--------------------|----------------------------|-----------------|
| Mushroom | $197.2 \pm 51.2$  | $0.0 \pm 0.0\%$    | $2.5 \pm 0.6$              | $10 \pm 0.6$    |
| Stubby   | $233.3 \pm 60.5$  | $0.0 \pm 0.0\%$    | $2.2 \pm 0.6$              | $14 \pm 3.6$    |

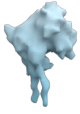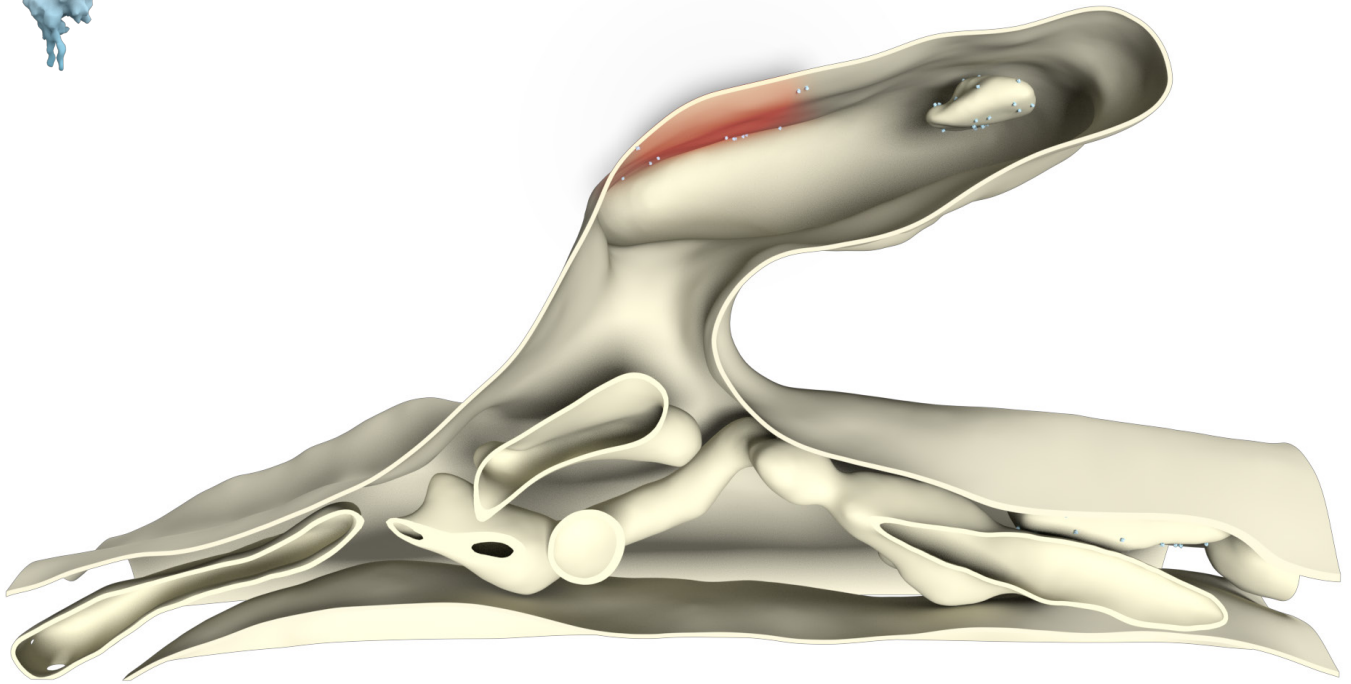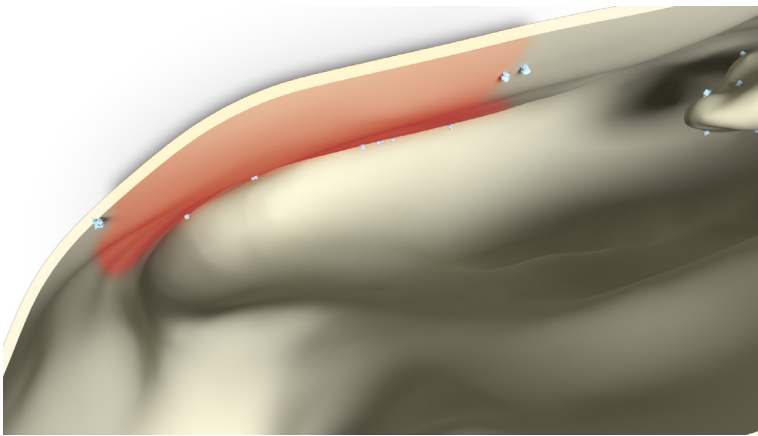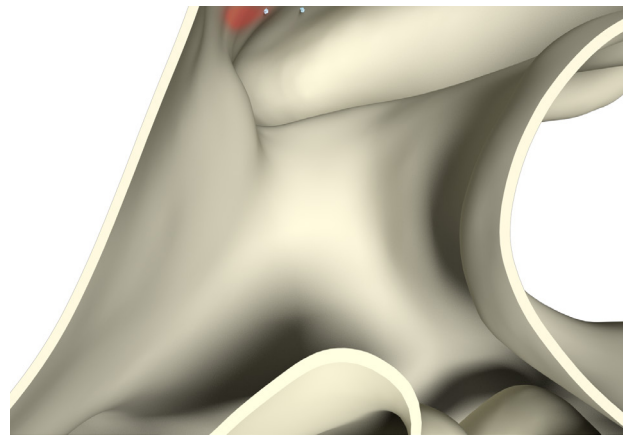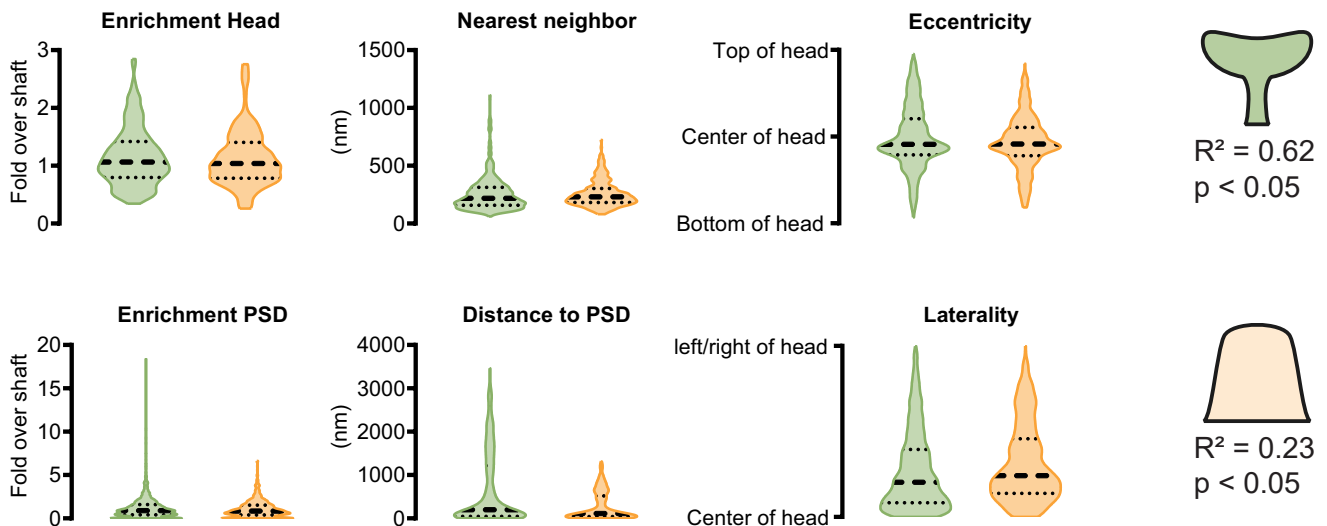

|          | Spine copy number | % of total protein | Molarity ( $\mu\text{M}$ ) | PSD copy number |
|----------|-------------------|--------------------|----------------------------|-----------------|
| Mushroom | $197.2 \pm 51.2$  | $0.0 \pm 0.0\%$    | $2.5 \pm 0.6$              | $10 \pm 0.6$    |
| Stubby   | $233.3 \pm 60.5$  | $0.0 \pm 0.0\%$    | $2.2 \pm 0.6$              | $14 \pm 3.6$    |

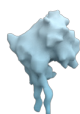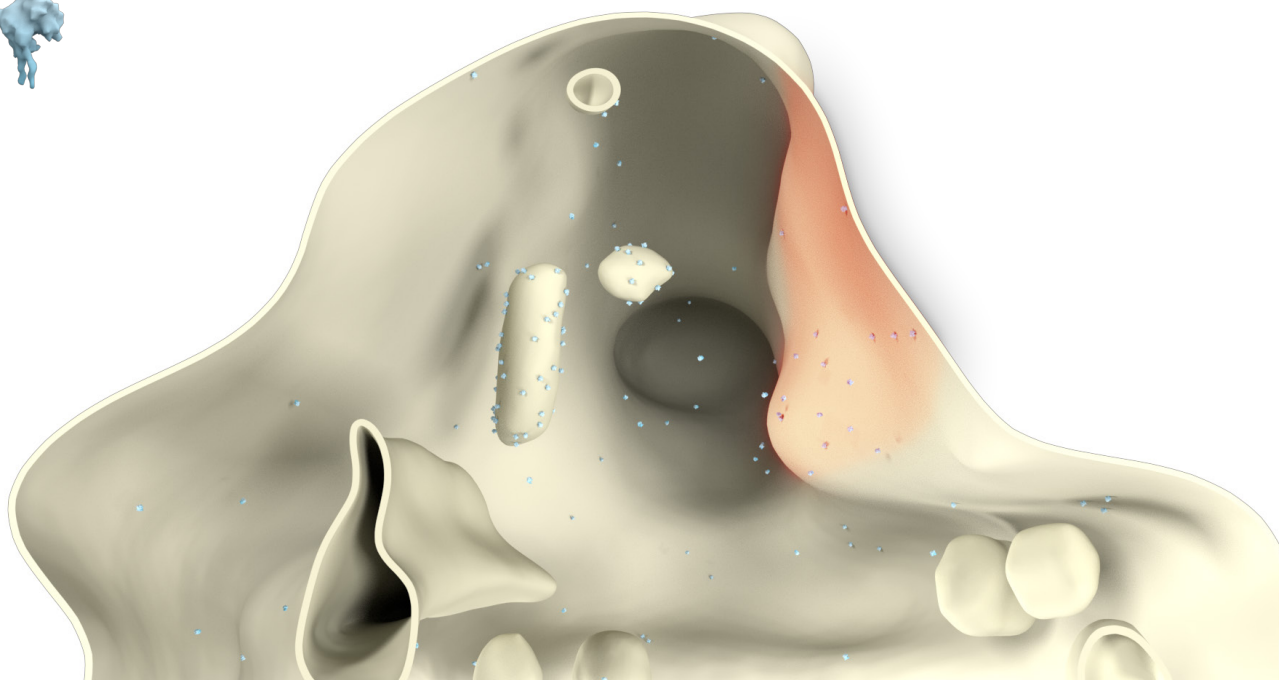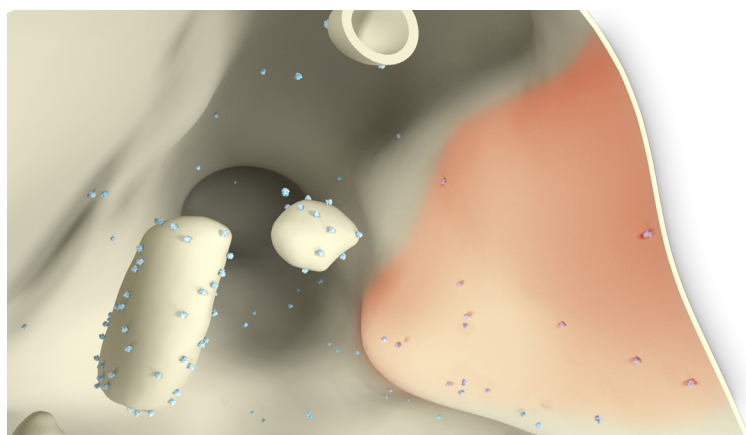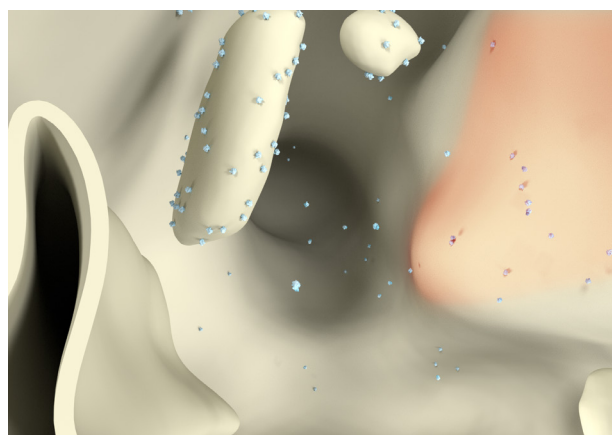

## References

**Antibody:** BD Biosciences 610888

**PDB Identifier:** 1yu9

### Literature:

Brown et al., 2007, J. Neurosci.

de Wit et al., 2001, Mol. Biol. Cell.

Gu and Huganir, 2016, Proc. Natl. Acad. Sci. U S A

Hoogenraad et al., 2010, PLoS Biol.

Mohrmann et al., 2002, J. Biol. Chem.



## Rab5 (Gene: Rab5a, Uniprot ID: M0RC99)

**Known function:** Early endosome trafficking, Basal AMPAR recycling

**Known organization:** Membrane-associated and cytosolic

**Known Interactions:** Syntaxin13

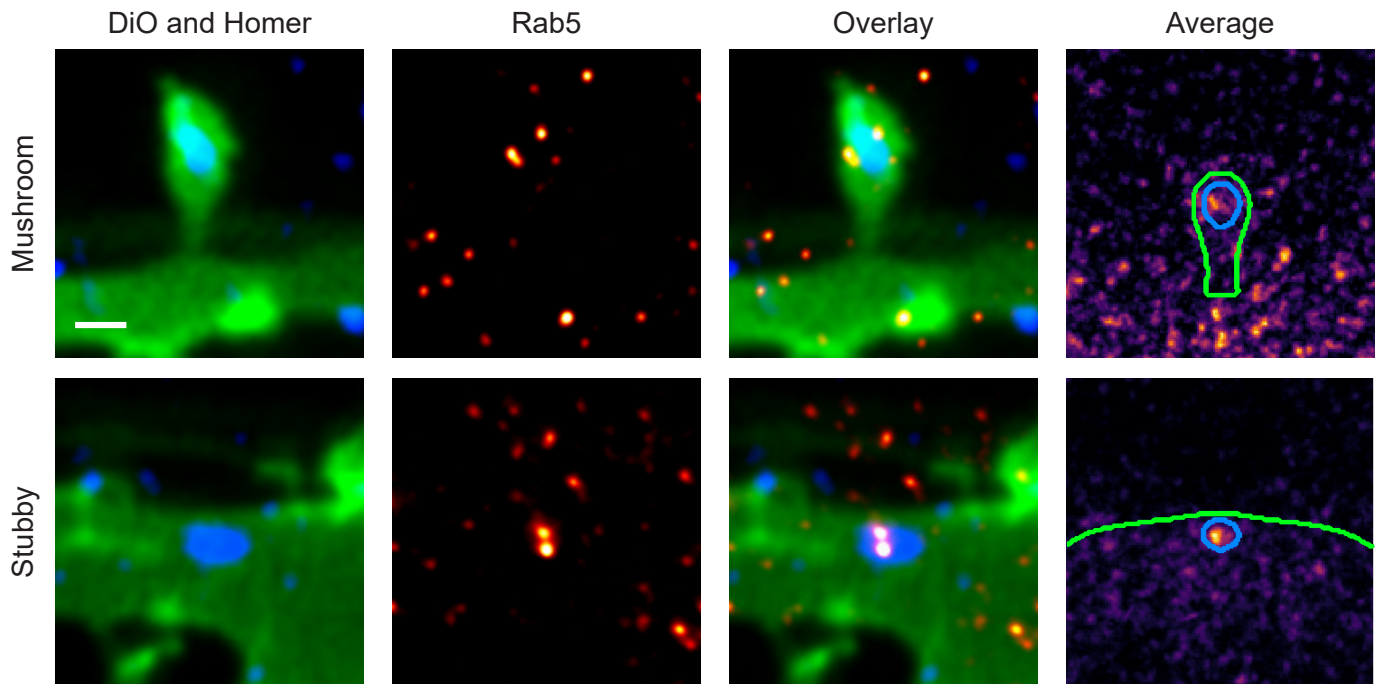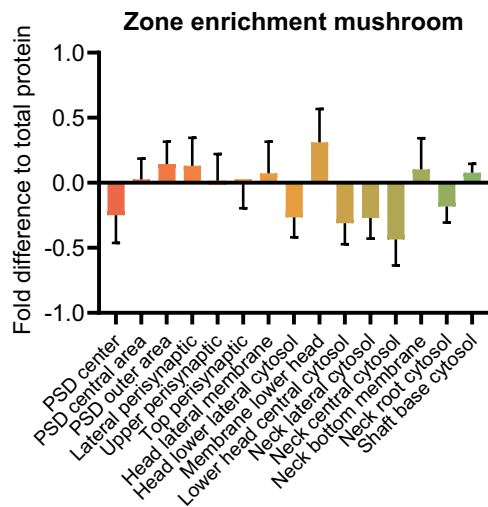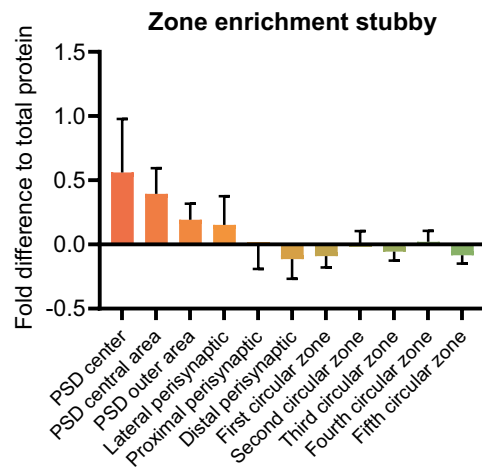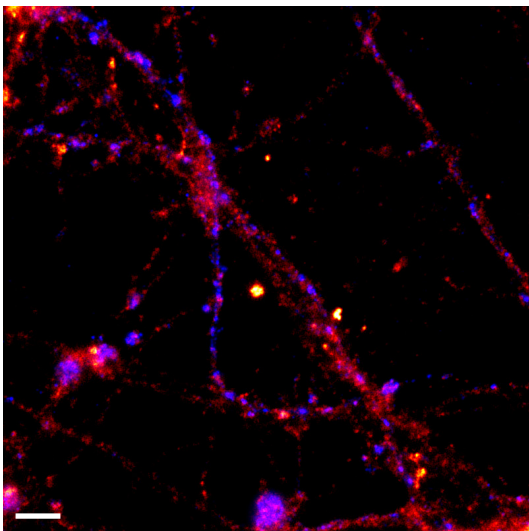

|                        |                            |                 |
|------------------------|----------------------------|-----------------|
| Whole cell copy number | 22383583.4 ± 1784814.1     |                 |
| Spine copy number      | 4850.6 ± 827.7             |                 |
| Function               | Exo-/Endocytosis cofactors |                 |
|                        | Mushroom                   | Stubby          |
| Spine copy number      | 3574.0 ± 609.9             | 6685.3 ± 1140.8 |
| % of total protein     | 0.4 ± 0.1%                 | 0.7 ± 0.1%      |
| Molarity (μM)          | 45.4 ± 7.7                 | 63.2 ± 10.8     |
| PSD copy number        | 439 ± 74.9                 | 1418 ± 242.0    |
| % in PSD               | 12.3 ± 2.1%                | 21.2 ± 3.6%     |

|          | Spine copy number   | % of total protein | Molarity ( $\mu\text{M}$ ) | PSD copy number  |
|----------|---------------------|--------------------|----------------------------|------------------|
| Mushroom | $3574.0 \pm 609.9$  | $0.4 \pm 0.1\%$    | $45.4 \pm 7.7$             | $439 \pm 74.9$   |
| Stubby   | $6685.3 \pm 1140.8$ | $0.7 \pm 0.1\%$    | $63.2 \pm 10.8$            | $1418 \pm 242.0$ |

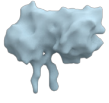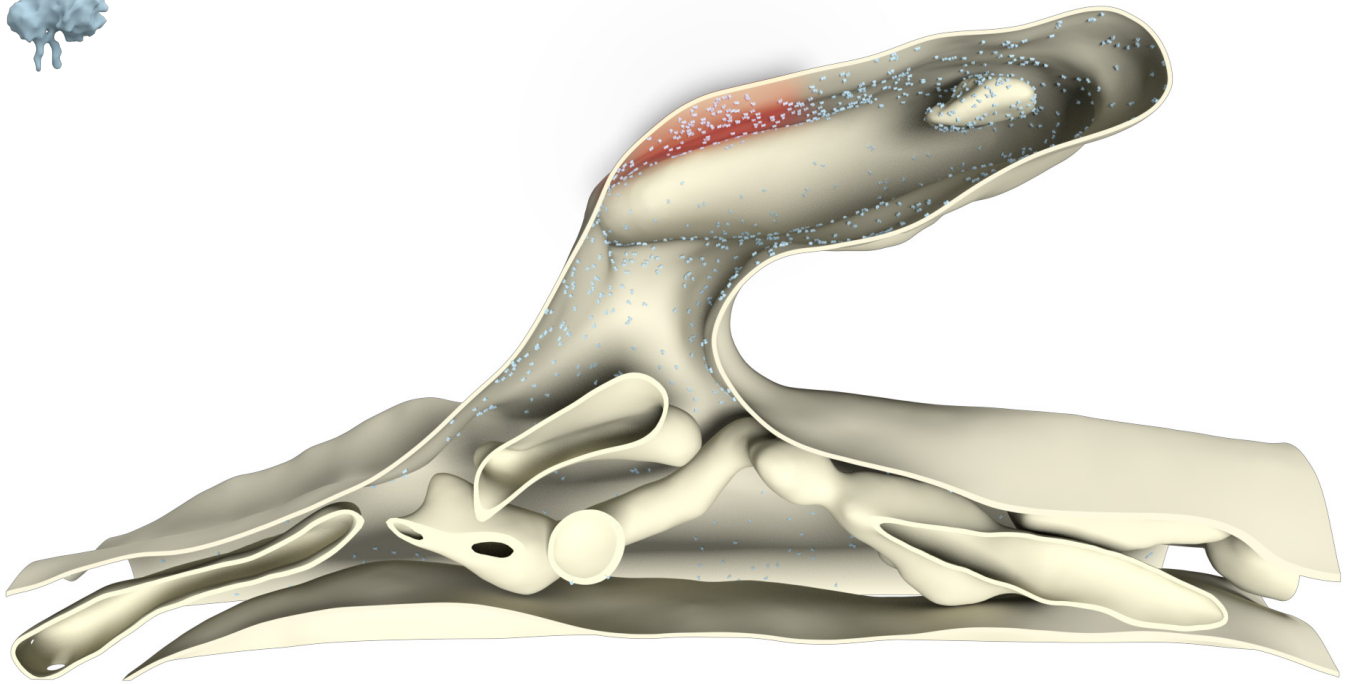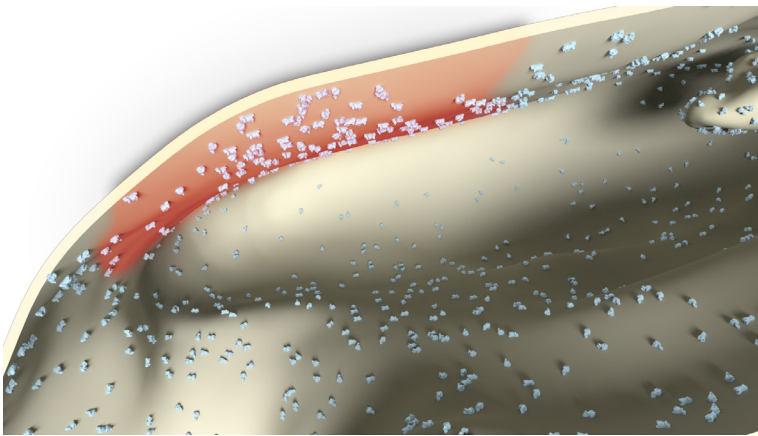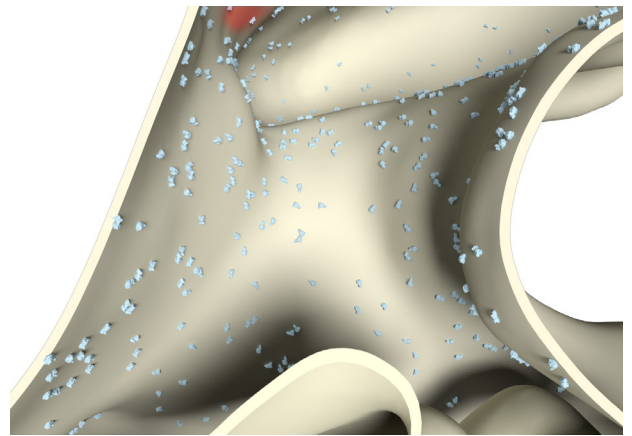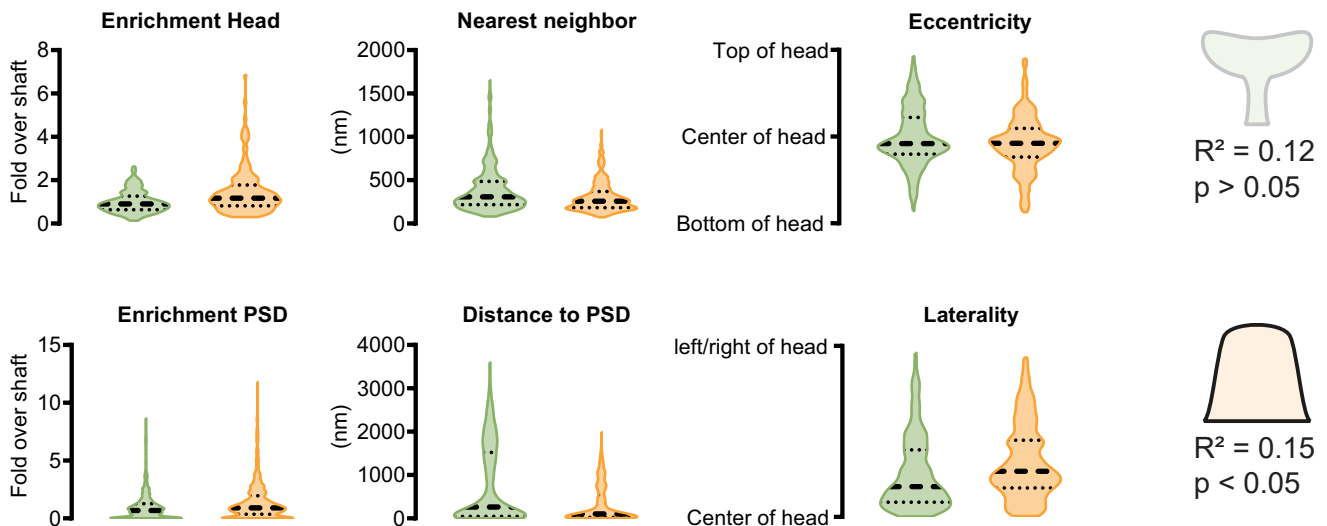

|          | Spine copy number   | % of total protein | Molarity ( $\mu\text{M}$ ) | PSD copy number  |
|----------|---------------------|--------------------|----------------------------|------------------|
| Mushroom | $3574.0 \pm 609.9$  | $0.4 \pm 0.1\%$    | $45.4 \pm 7.7$             | $439 \pm 74.9$   |
| Stubby   | $6685.3 \pm 1140.8$ | $0.7 \pm 0.1\%$    | $63.2 \pm 10.8$            | $1418 \pm 242.0$ |

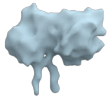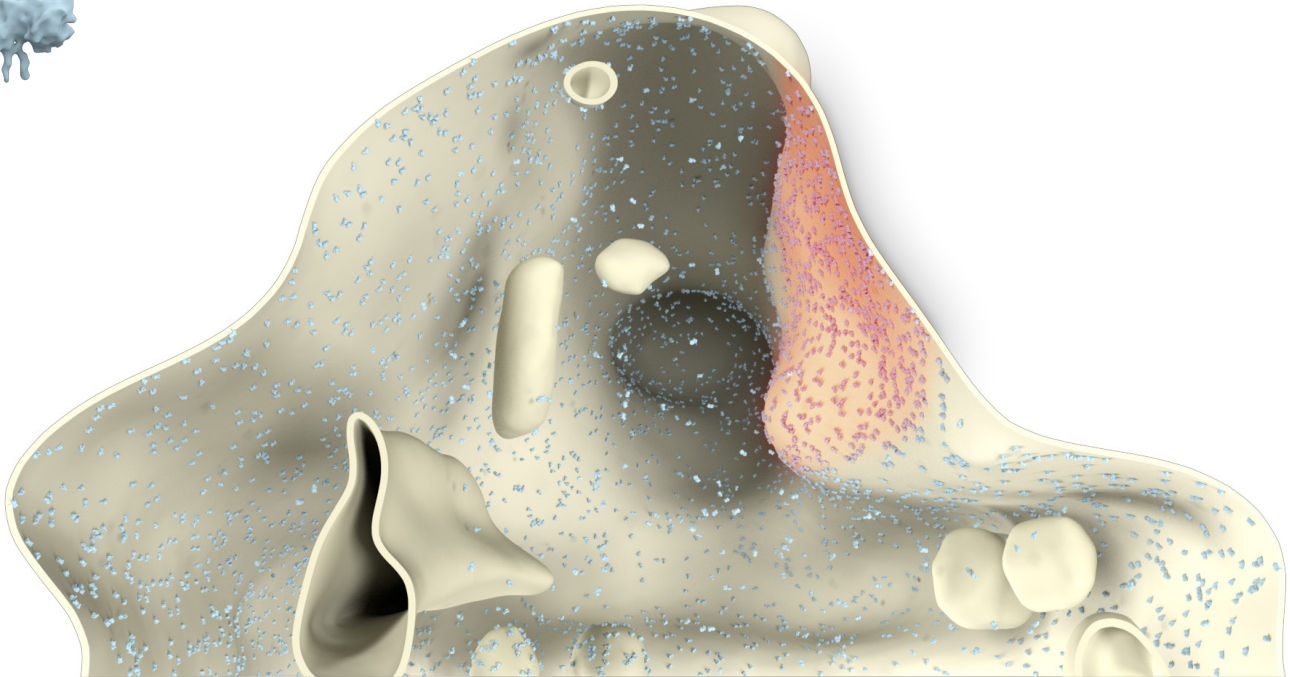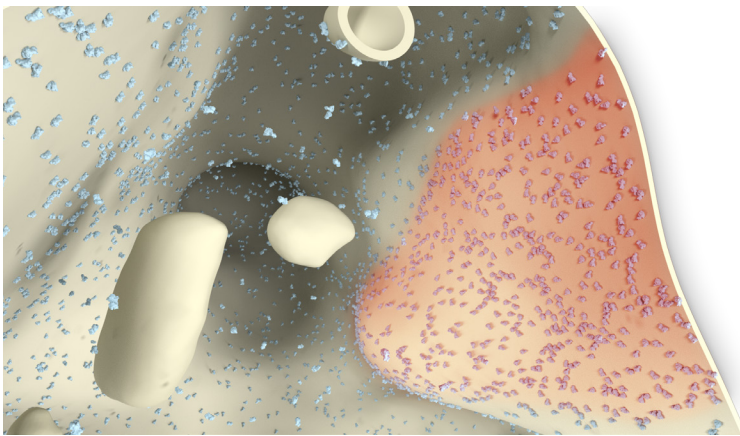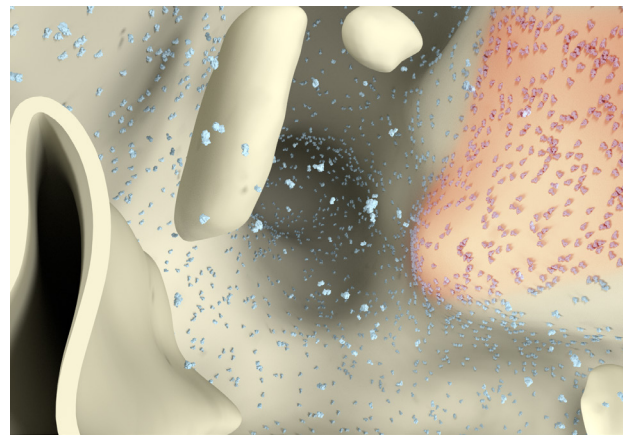

## References

**Antibody:** Reinhard Jahn laboratory cl. 621.3

**PDB Identifier:** 1tu4

### Literature:

Brown et al., 2005, Neuron

Bucci et al., 1992, Cell

Deinhardt et al., 2006, Neuron

Fischer von Mollard et al., 1994, Eur J Cell Biol.

Gu et al., 2016, Proc. Natl. Acad. Sci. U S A

McBride et al., 1999, Cell

Szíber et al., 2017, Mol. Biol. Cell.



## Rab7 (Gene: Rab7a, Uniprot ID: P09527)

**Known function:** Late endosome to lysosome trafficking, Involved in AMPAR trafficking

**Known organization:** Membrane-associated and cytosolic

**Known Interactions:** None

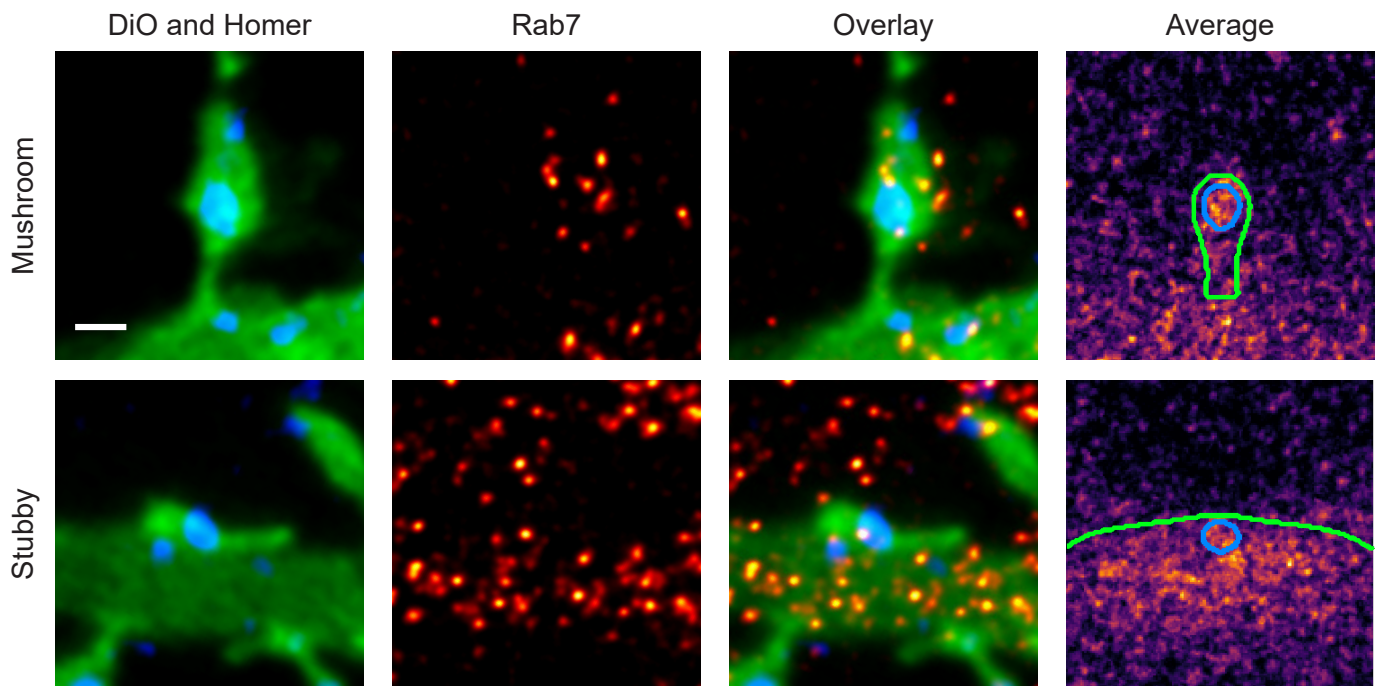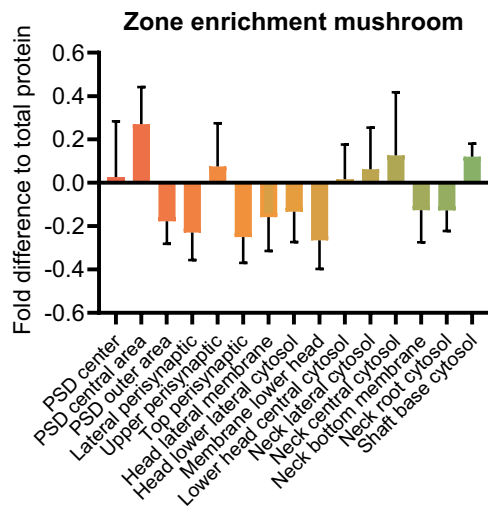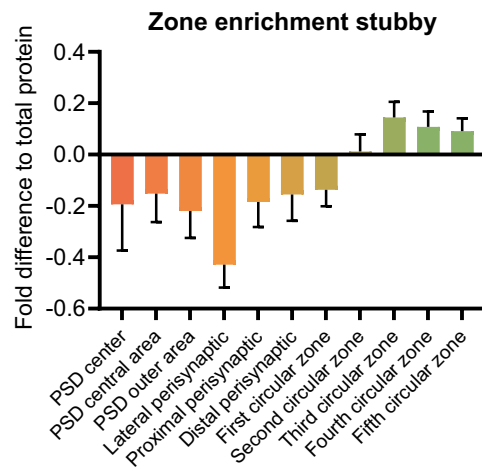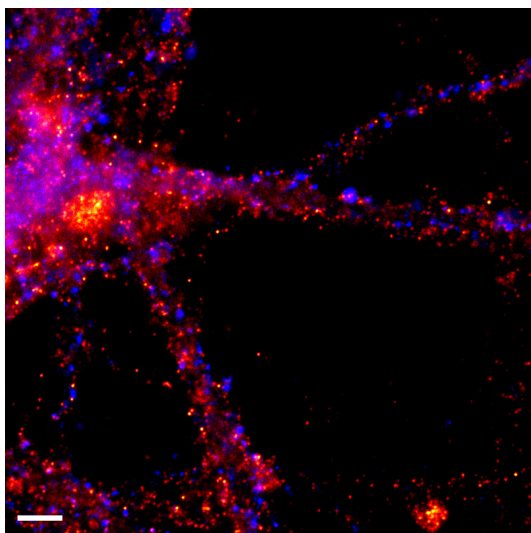

|                        |                            |                 |
|------------------------|----------------------------|-----------------|
| Whole cell copy number | 36822225.3 ± 1784814.1     |                 |
| Spine copy number      | 7539.5 ± 1488.4            |                 |
| Function               | Exo-/Endocytosis cofactors |                 |
|                        | Mushroom                   | Stubby          |
| Spine copy number      | 5658.7 ± 1117.1            | 9802.5 ± 1935.2 |
| % of total protein     | 0.6 ± 0.1%                 | 1.0 ± 0.2%      |
| Molarity (μM)          | 71.9 ± 14.2                | 92.6 ± 18.3     |
| PSD copy number        | 538 ± 106.2                | 708 ± 139.8     |
| % in PSD               | 9.5 ± 1.9%                 | 7.2 ± 1.4%      |

|          | Spine copy number   | % of total protein | Molarity ( $\mu\text{M}$ ) | PSD copy number |
|----------|---------------------|--------------------|----------------------------|-----------------|
| Mushroom | $5658.7 \pm 1117.1$ | $0.6 \pm 0.1\%$    | $71.9 \pm 14.2$            | $538 \pm 106.2$ |
| Stubby   | $9802.5 \pm 1935.2$ | $1.0 \pm 0.2\%$    | $92.6 \pm 18.3$            | $708 \pm 139.8$ |

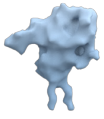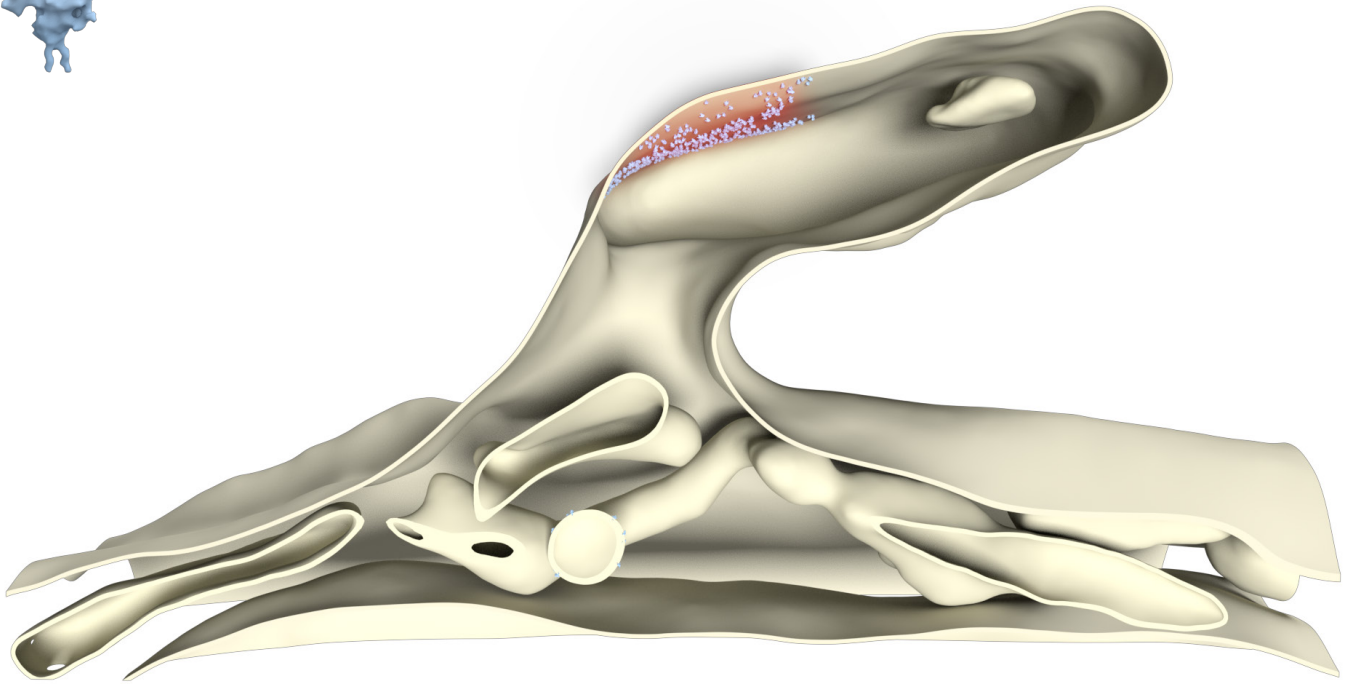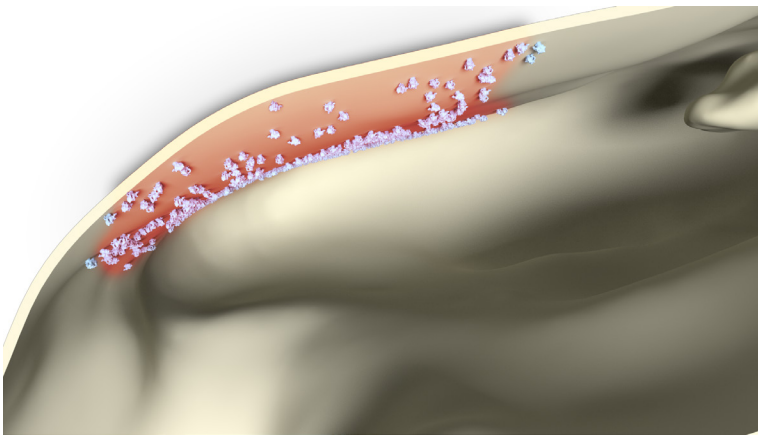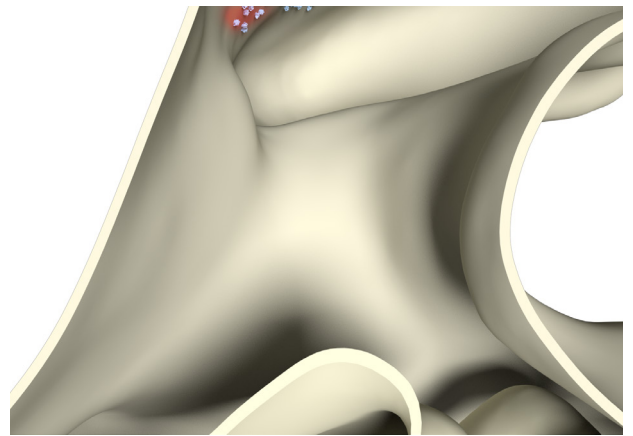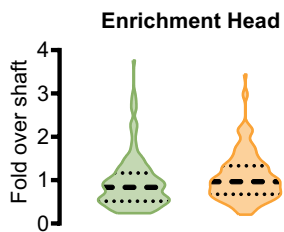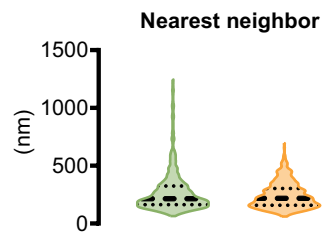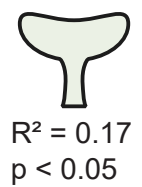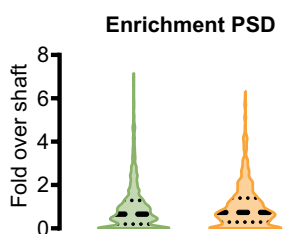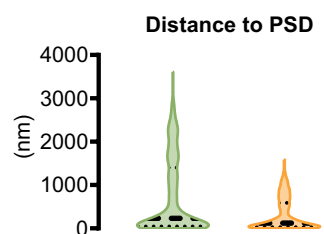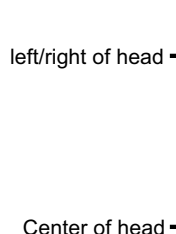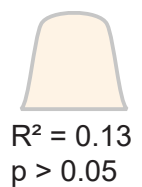

|          | Spine copy number   | % of total protein | Molarity ( $\mu\text{M}$ ) | PSD copy number |
|----------|---------------------|--------------------|----------------------------|-----------------|
| Mushroom | $5658.7 \pm 1117.1$ | $0.6 \pm 0.1\%$    | $71.9 \pm 14.2$            | $538 \pm 106.2$ |
| Stubby   | $9802.5 \pm 1935.2$ | $1.0 \pm 0.2\%$    | $92.6 \pm 18.3$            | $708 \pm 139.8$ |

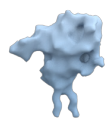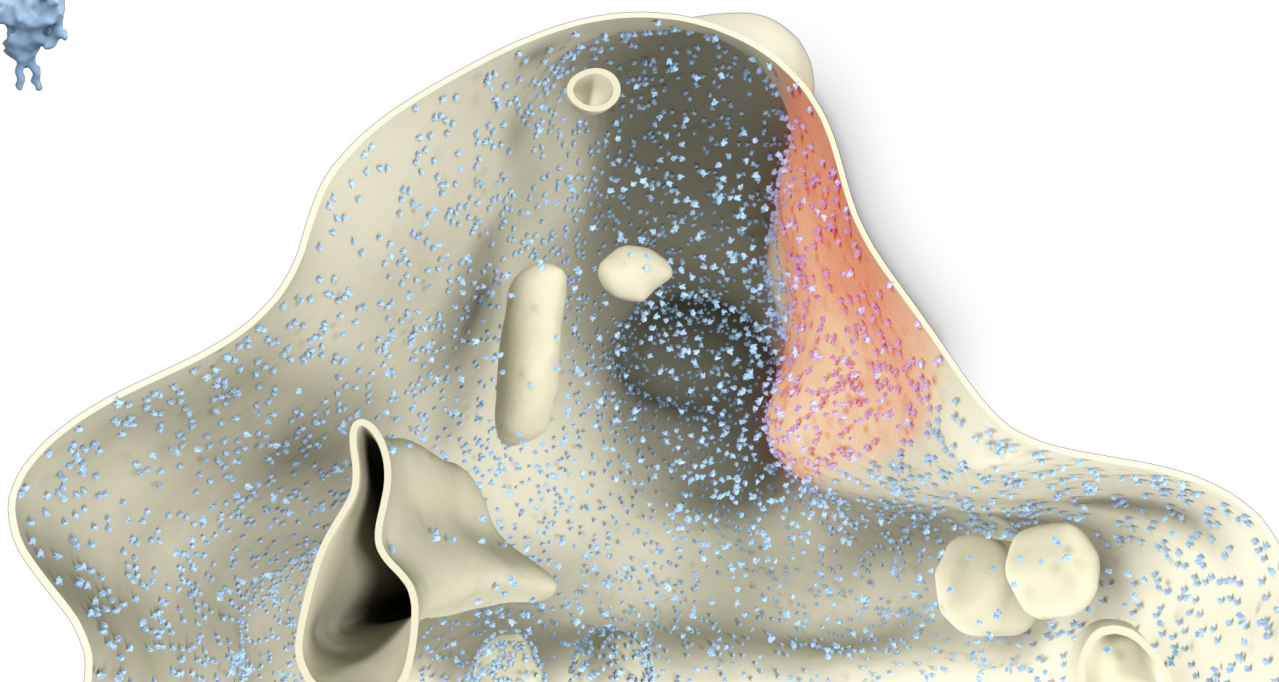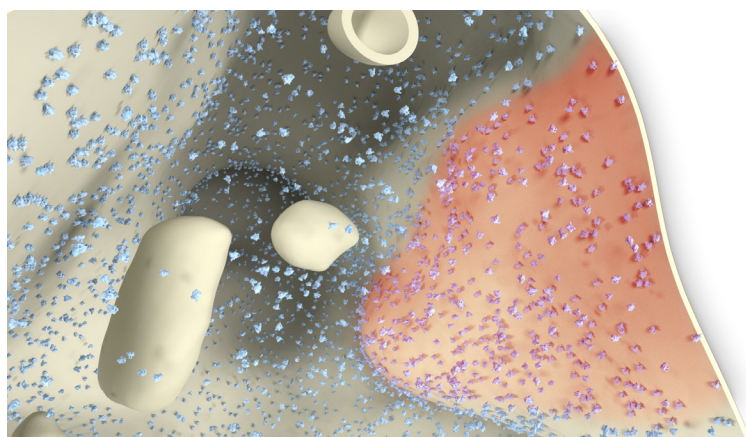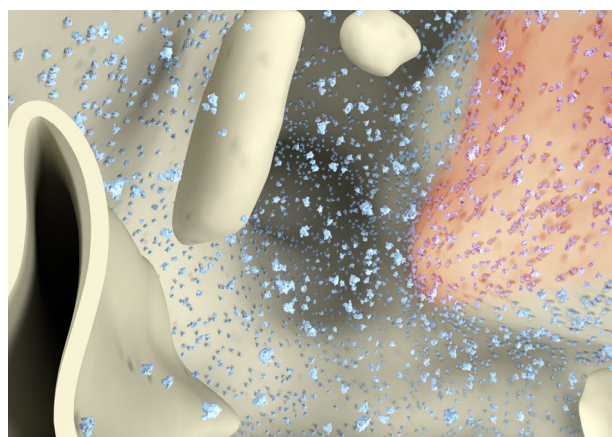

## References

**Antibody:** Cell Signaling 9367

**PDB Identifier:** 1vg1

### Literature:

Deinhardt et al., 2006, Neuron

Gutierrez et al., 2004, J. Cell. Sci.

Lee et al., 2013, Mol. Cells.



## Rab9 (Gene: Rab9a, Uniprot ID: Q99P75)

**Known function:** Late endosome to TGN trafficking

**Known organization:** Membrane-associated and cytosolic

**Known Interactions:** None

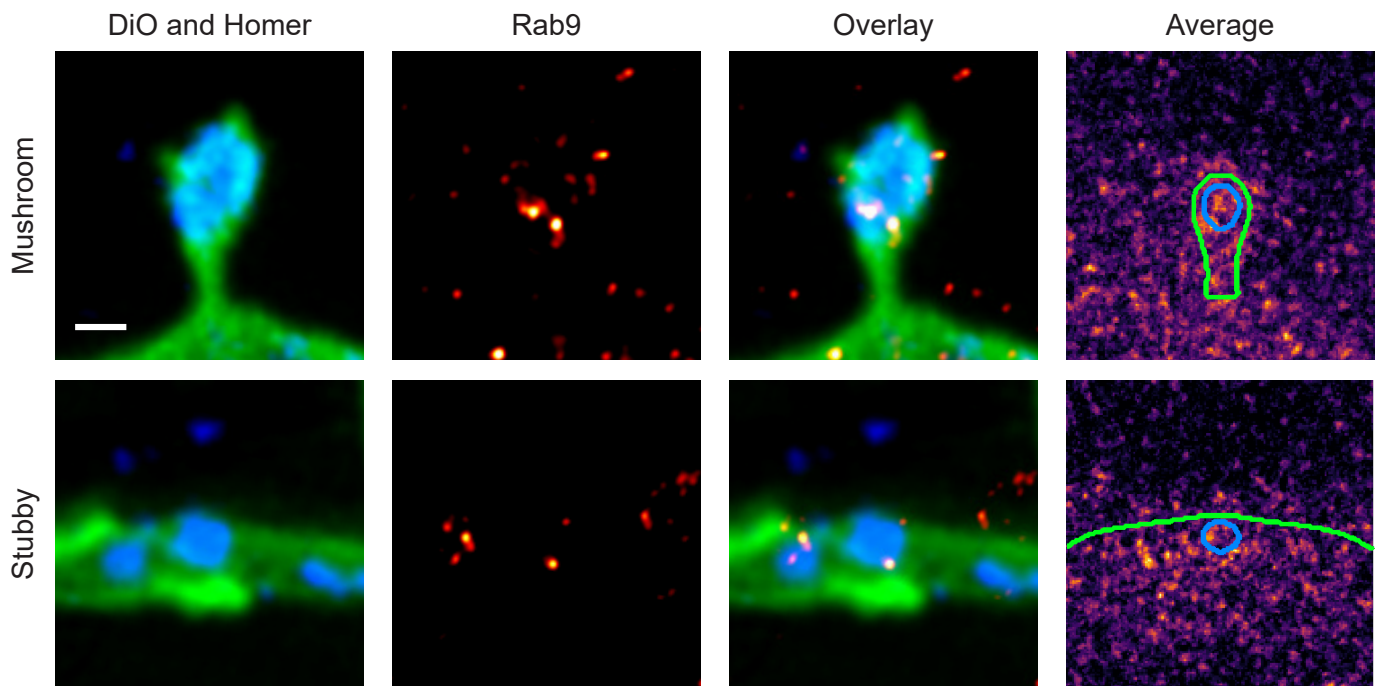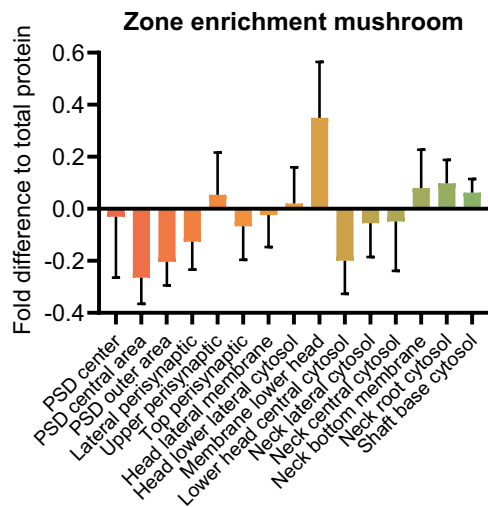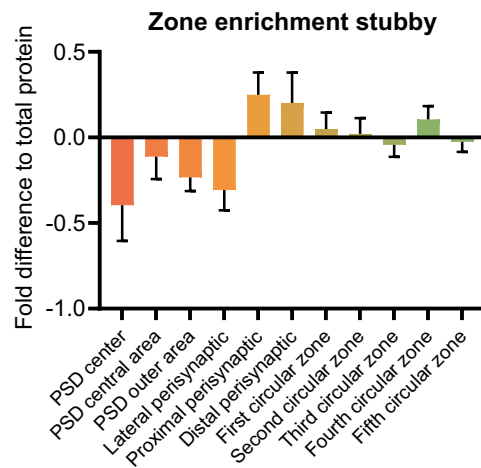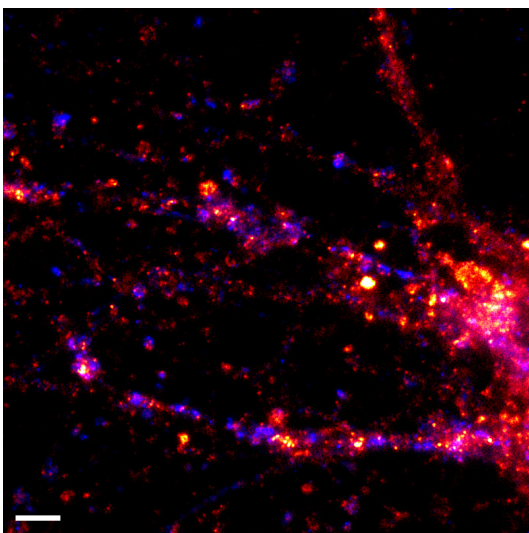

|                        |                            |              |
|------------------------|----------------------------|--------------|
| Whole cell copy number | 3743037.1 ± 1160145.4      |              |
| Spine copy number      | 53.4 ± 104.1               |              |
| Function               | Exo-/Endocytosis cofactors |              |
|                        | Mushroom                   | Stubby       |
| Spine copy number      | 51.5 ± 100.3               | 56.3 ± 109.7 |
| % of total protein     | 0.0 ± 0.0%                 | 0.0 ± 0.0%   |
| Molarity (μM)          | 0.7 ± 1.3                  | 0.5 ± 1.0    |
| PSD copy number        | 0 ± 0.0                    | 0 ± 0.0      |
| % in PSD               | 0.0 ± 0.0%                 | 0.0 ± 0.0%   |

|          | Spine copy number | % of total protein | Molarity ( $\mu\text{M}$ ) | PSD copy number |
|----------|-------------------|--------------------|----------------------------|-----------------|
| Mushroom | $51.5 \pm 100.3$  | $0.0 \pm 0.0\%$    | $0.7 \pm 1.3$              | $0 \pm 0.0$     |
| Stubby   | $56.3 \pm 109.7$  | $0.0 \pm 0.0\%$    | $0.5 \pm 1.0$              | $0 \pm 0.0$     |

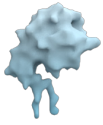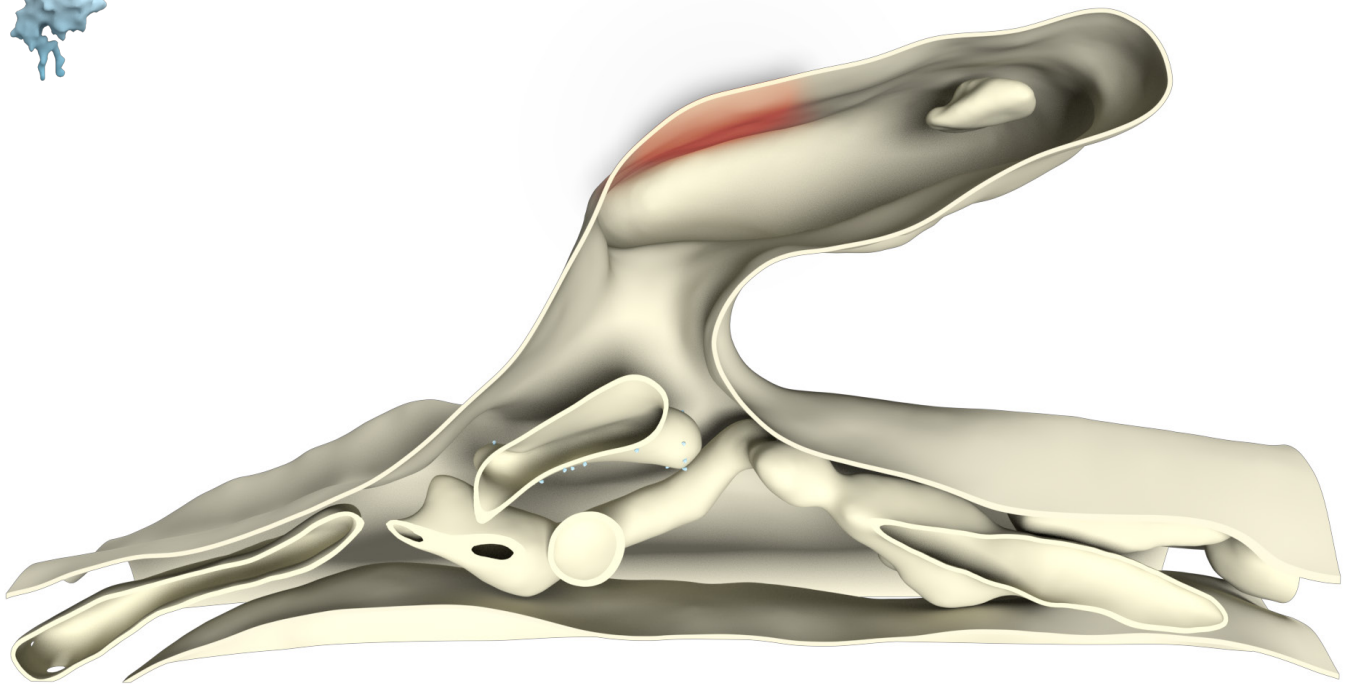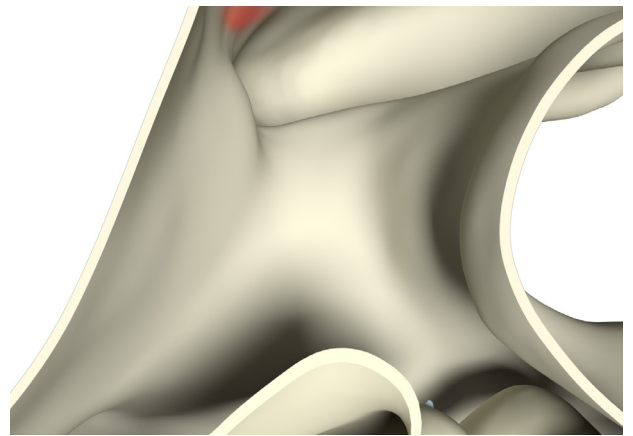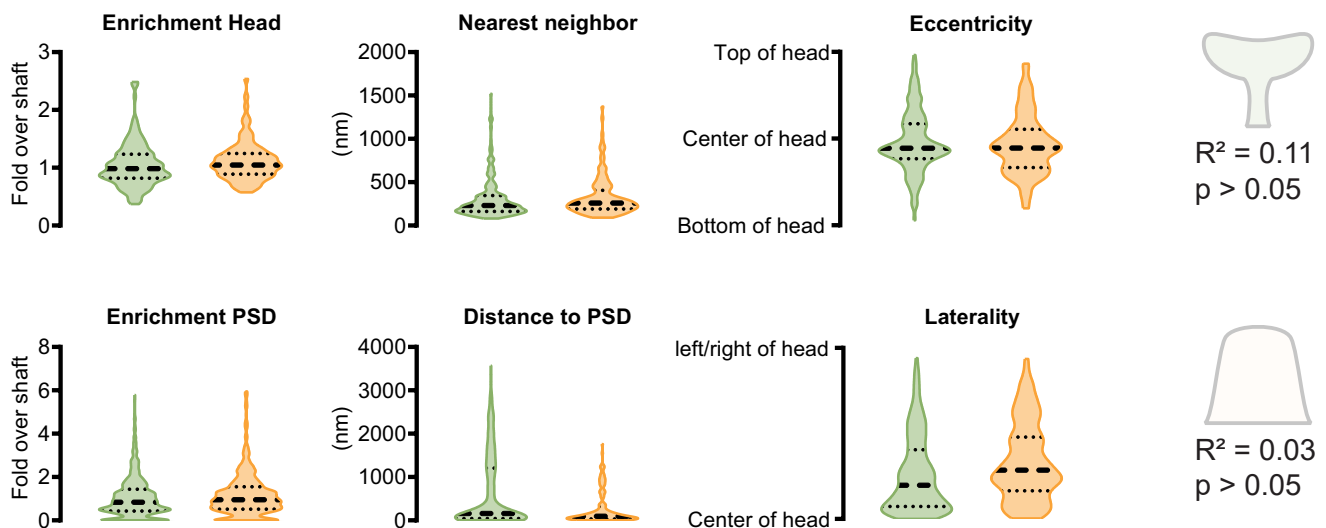

|          | Spine copy number | % of total protein | Molarity ( $\mu\text{M}$ ) | PSD copy number |
|----------|-------------------|--------------------|----------------------------|-----------------|
| Mushroom | $51.5 \pm 100.3$  | $0.0 \pm 0.0\%$    | $0.7 \pm 1.3$              | $0 \pm 0.0$     |
| Stubby   | $56.3 \pm 109.7$  | $0.0 \pm 0.0\%$    | $0.5 \pm 1.0$              | $0 \pm 0.0$     |

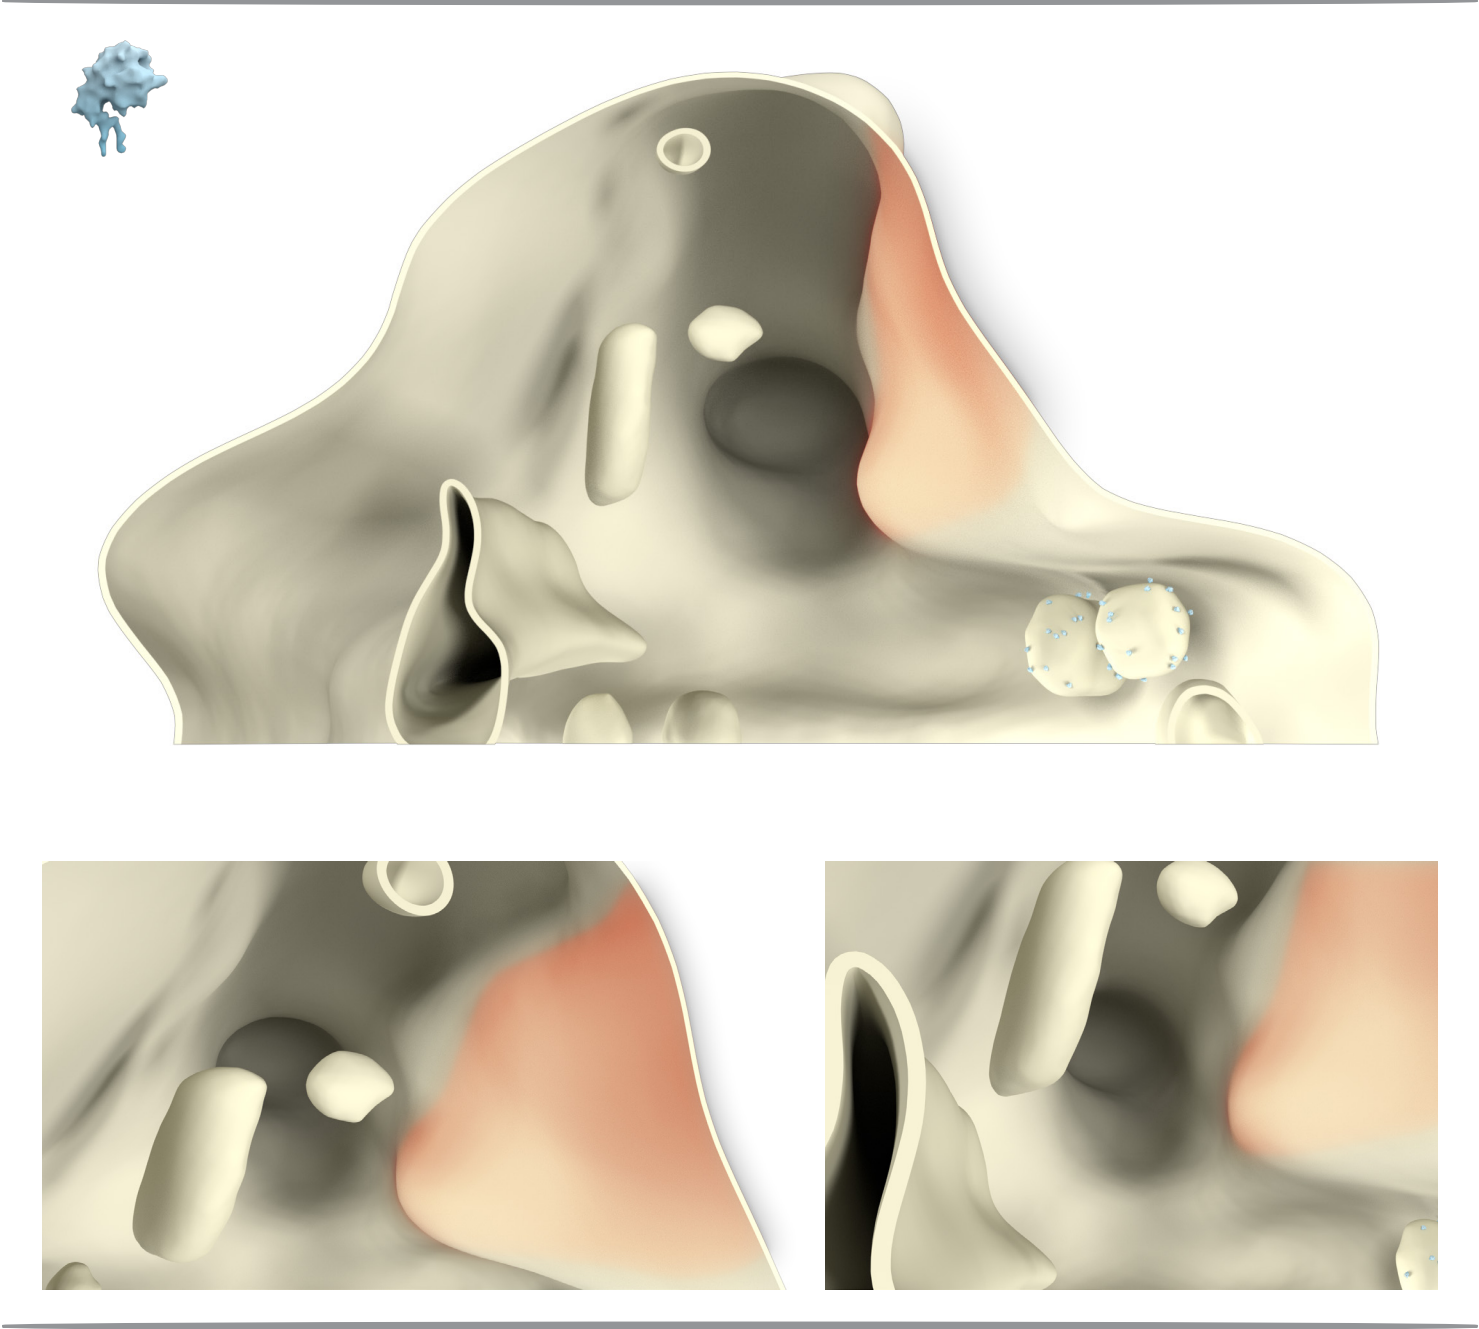

References

**Antibody:** Cell Signaling 5118

**PDB Identifier:** 4qxa

Literature:

Díaz et al., 1997, J. Cell. Biol.  
 Ganley et al., 2004, Mol. Biol. Cell.  
 Lombardi et al., 1993, EMBO J.



## Rab11 (Gene: Rab11a, Uniprot ID: P62494)

**Known function:** TGN to PM trafficking, Involved in basal and regulated AMPAR and TrkB trafficking, Involved in neurite growth

**Known organization:** Membrane-associated and cytosolic

**Known Interactions:** None

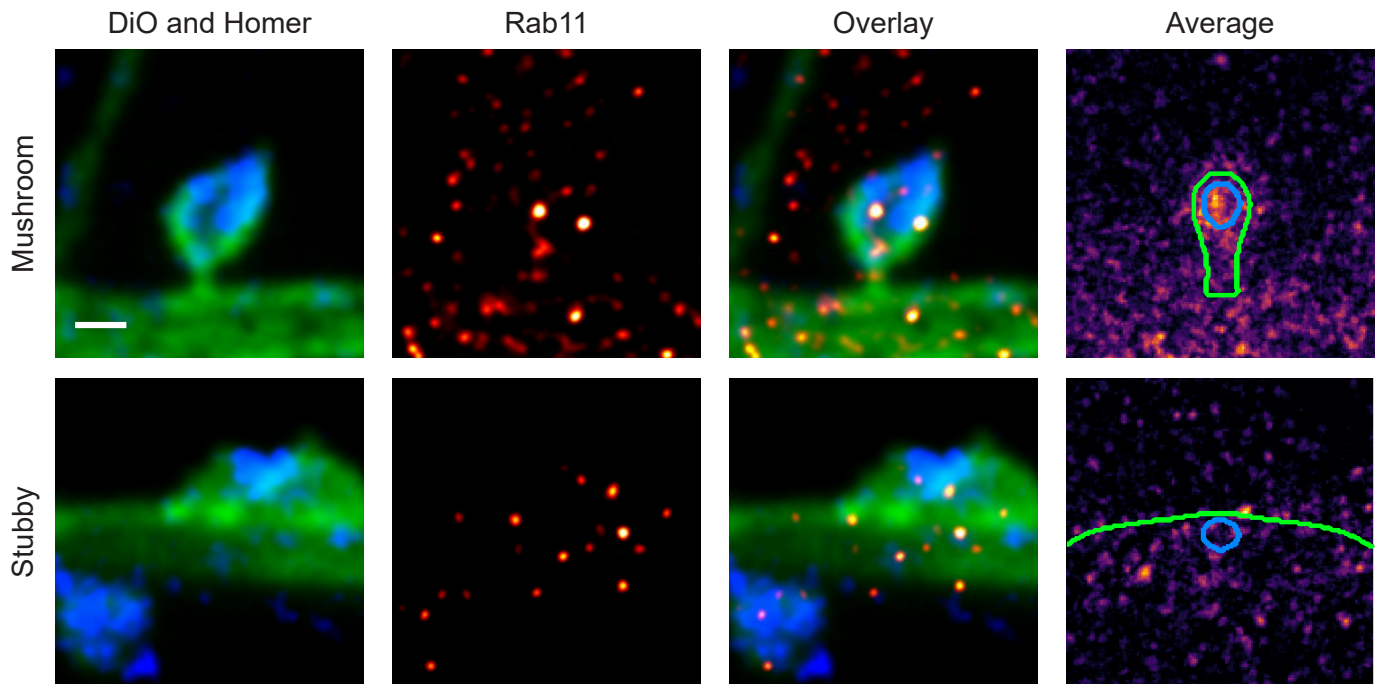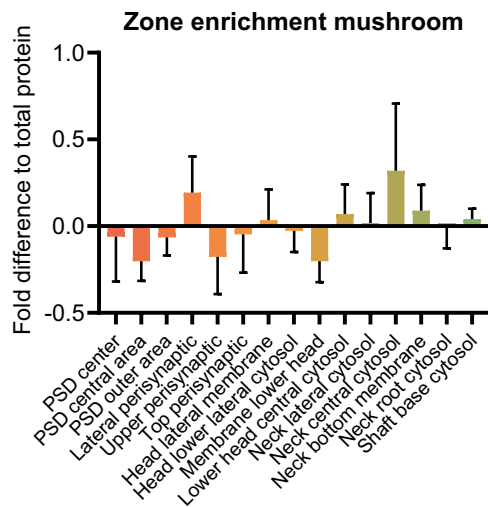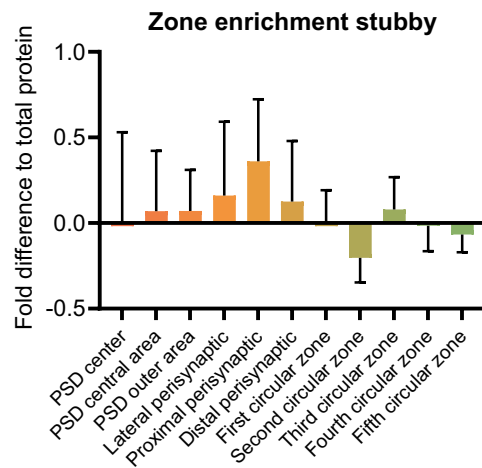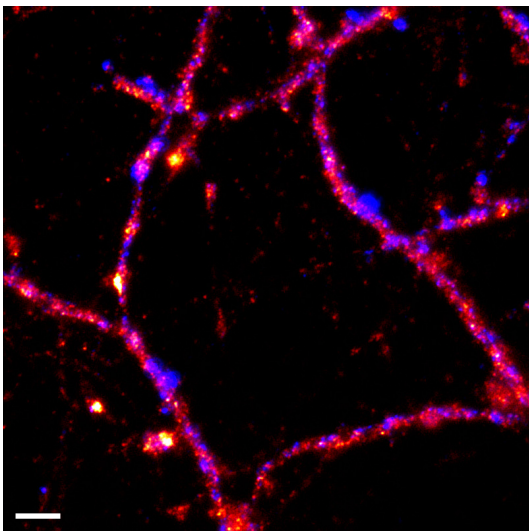

|                        |                            |               |
|------------------------|----------------------------|---------------|
| Whole cell copy number | 18244831.1 ± 1801809.0     |               |
| Spine copy number      | 863.5 ± 506.1              |               |
| Function               | Exo-/Endocytosis cofactors |               |
|                        | Mushroom                   | Stubby        |
| Spine copy number      | 1059.3 ± 620.9             | 749.3 ± 439.2 |
| % of total protein     | 0.1 ± 0.1%                 | 0.1 ± 0.0%    |
| Molarity (μM)          | 13.5 ± 7.9                 | 7.1 ± 4.2     |
| PSD copy number        | 206 ± 120.8                | 76 ± 44.5     |
| % in PSD               | 19.4 ± 11.4%               | 10.1 ± 5.9%   |

|          | Spine copy number  | % of total protein | Molarity ( $\mu\text{M}$ ) | PSD copy number |
|----------|--------------------|--------------------|----------------------------|-----------------|
| Mushroom | $1059.3 \pm 620.9$ | $0.1 \pm 0.1\%$    | $13.5 \pm 7.9$             | $206 \pm 120.8$ |
| Stubby   | $749.3 \pm 439.2$  | $0.1 \pm 0.0\%$    | $7.1 \pm 4.2$              | $76 \pm 44.5$   |

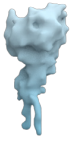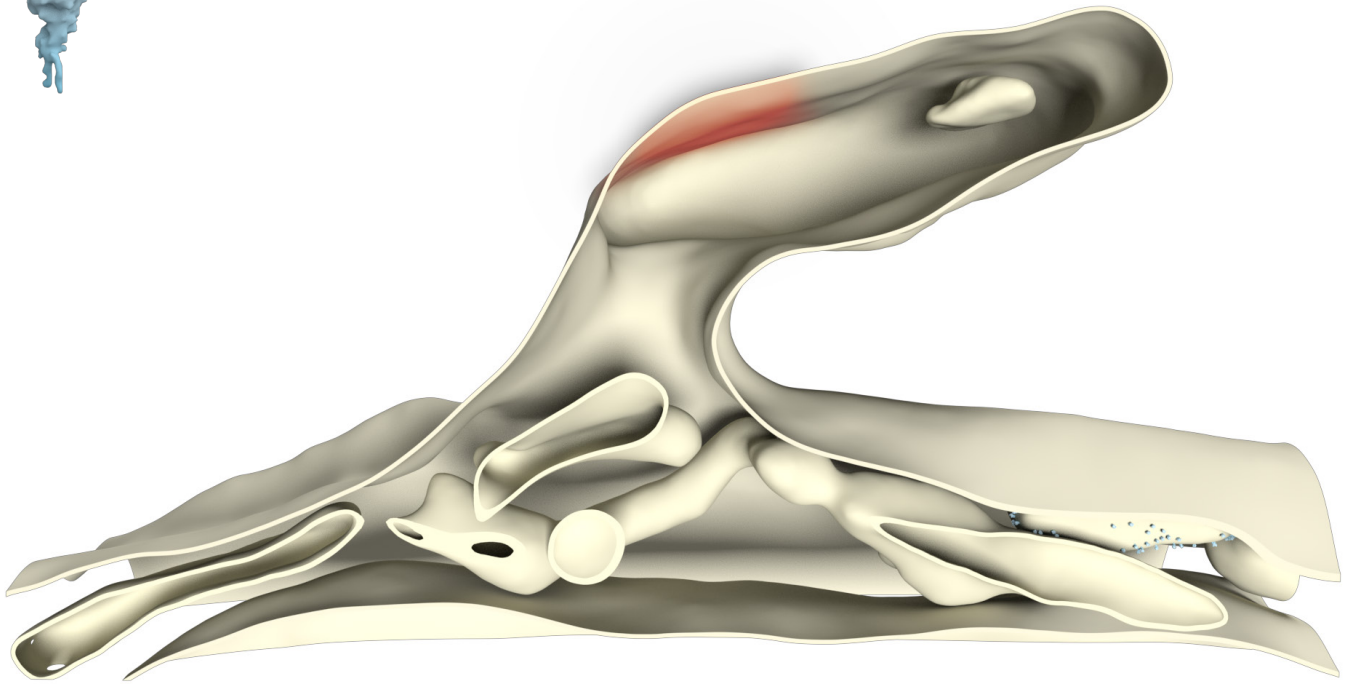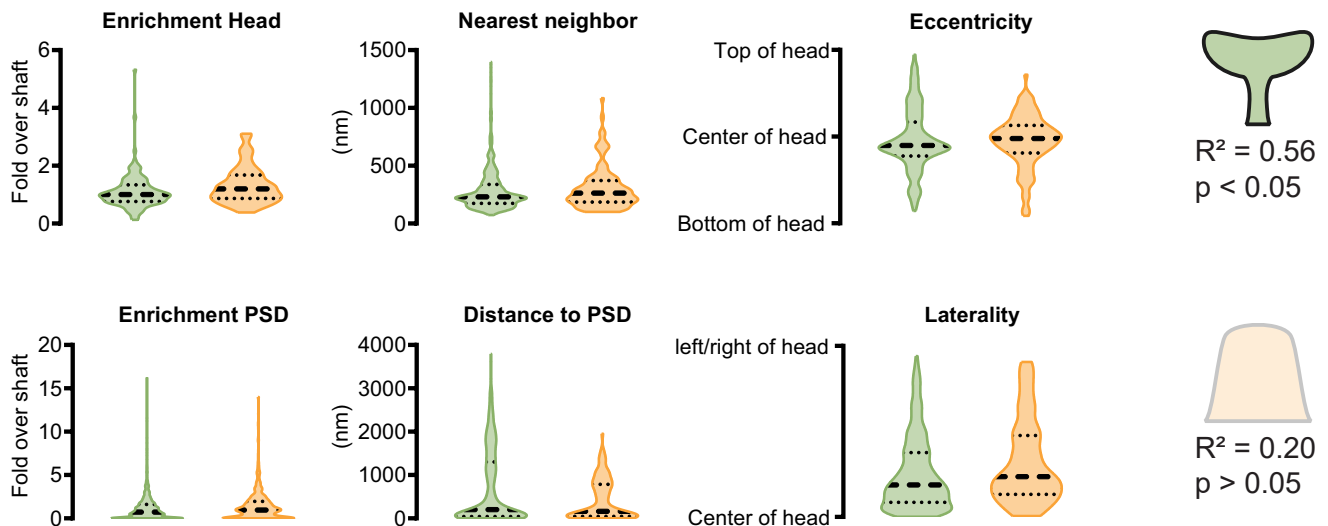

|          | Spine copy number  | % of total protein | Molarity ( $\mu\text{M}$ ) | PSD copy number |
|----------|--------------------|--------------------|----------------------------|-----------------|
| Mushroom | $1059.3 \pm 620.9$ | $0.1 \pm 0.1\%$    | $13.5 \pm 7.9$             | $206 \pm 120.8$ |
| Stubby   | $749.3 \pm 439.2$  | $0.1 \pm 0.0\%$    | $7.1 \pm 4.2$              | $76 \pm 44.5$   |

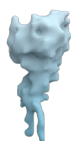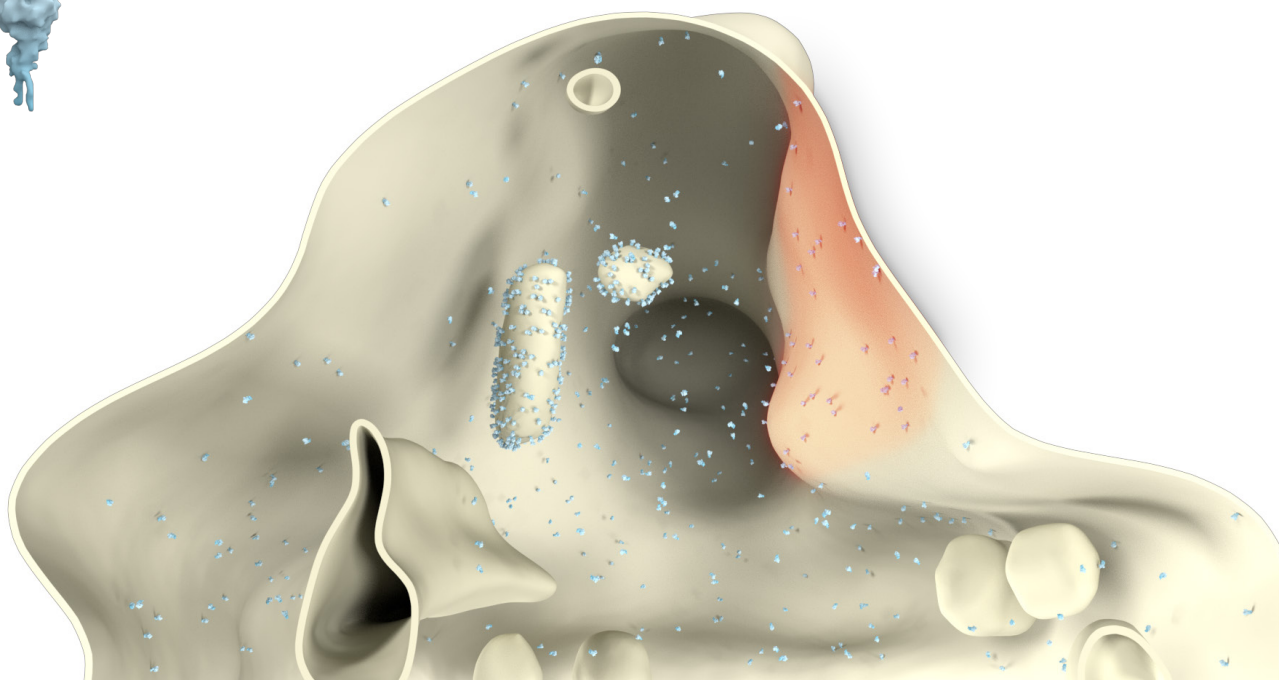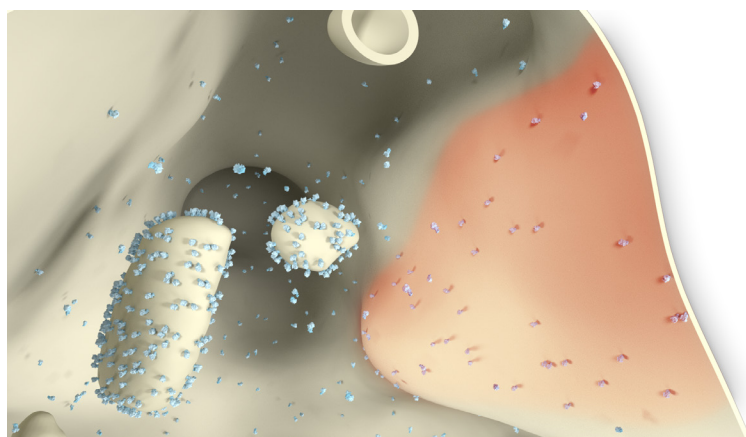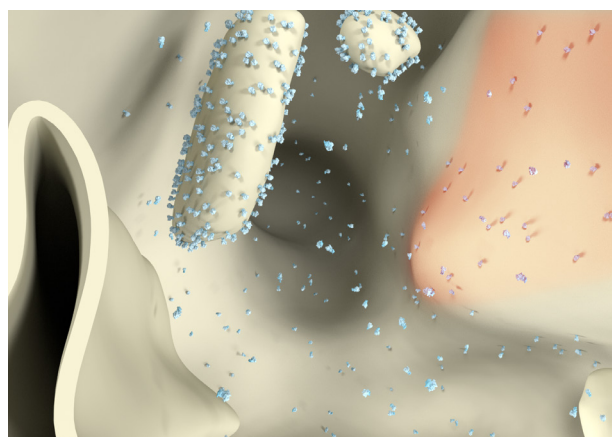

## References

**Antibody:** Cell Signaling 3539

**PDB Identifier:** 1yzk

### Literature:

Bacaj et al., 2015a, J. Neurosci.

Brown et al., 2007, J. Neurosci.

Chen et al., 1998, Mol. Biol. Cell.

Gu et al., 2016, Proc. Natl. Acad. Sci. U S A

Huang et al., 2013, J. Neurosci.

Khvotchev et al., 2003, J. Neurosci.

Lazo et al., 2013, J. Neurosci.

Shirane and Nakayama, 2006, Science



Rapsyn (Gene: Rapsn, Uniprot ID: D3ZPG2)

Known function: Binds and clusters nAChR to the PSD, E3 ligase activity

Known organization: In PSD, very dynamic

Known Interactions: None

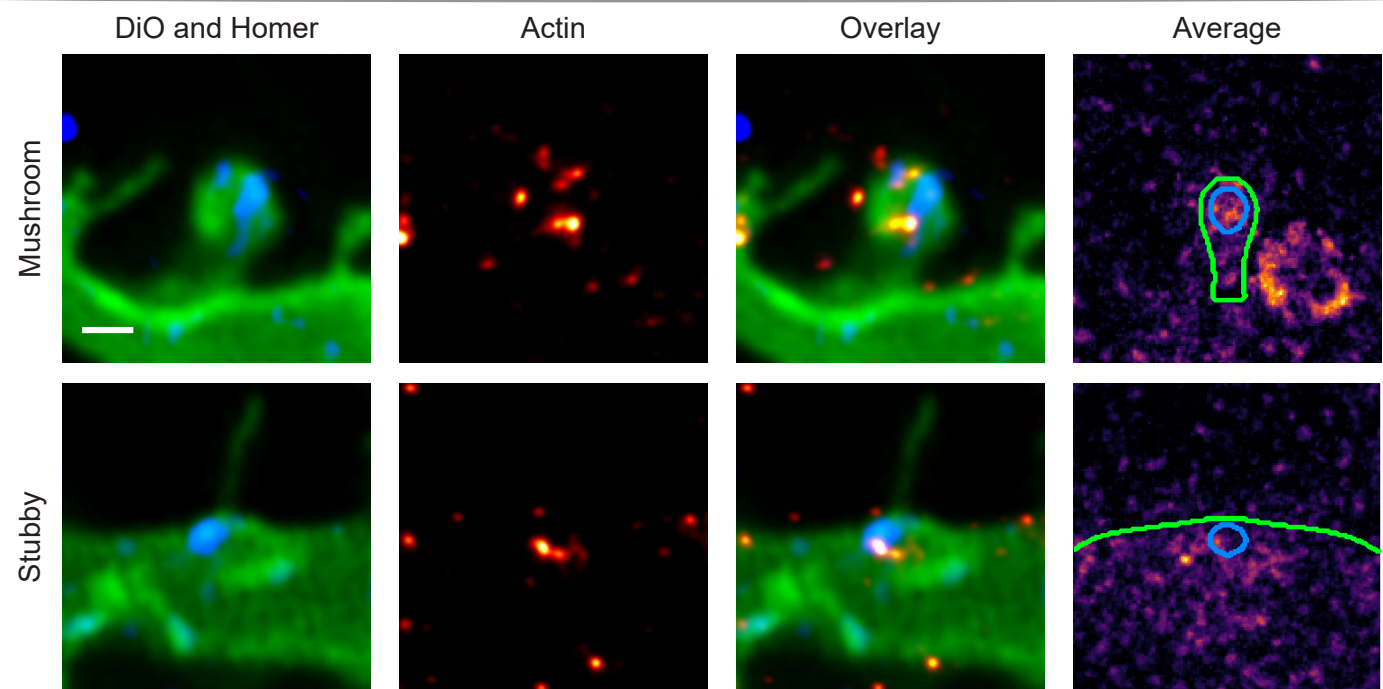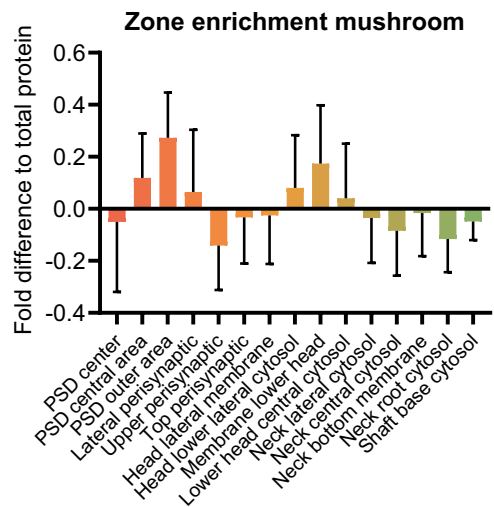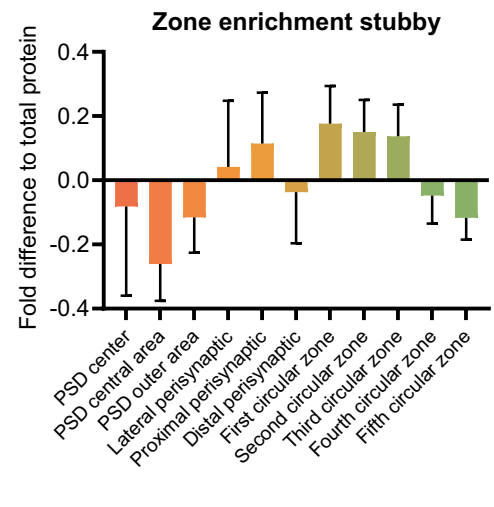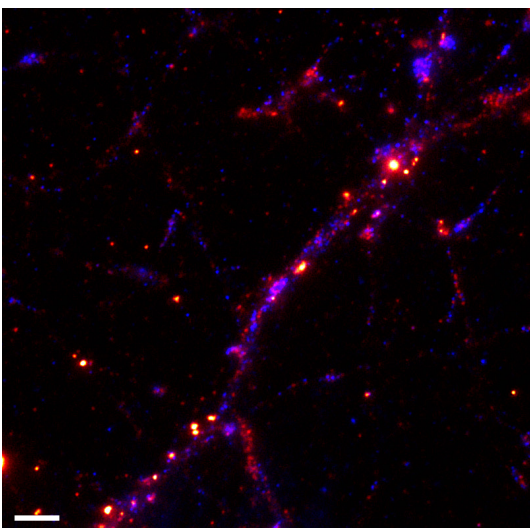

|                        |                      |               |
|------------------------|----------------------|---------------|
| Whole cell copy number | 3388460.4 ± 748084.5 |               |
| Spine copy number      | 206.5 ± 97.5         |               |
| Function               | PSD Scaffold         |               |
|                        | Mushroom             | Stubby        |
| Spine copy number      | 207.1 ± 97.7         | 223.9 ± 105.7 |
| % of total protein     | 0.0 ± 0.0%           | 0.0 ± 0.0%    |
| Molarity (µM)          | 2.6 ± 1.2            | 2.1 ± 1.0     |
| PSD copy number        | 38 ± 17.9            | 27 ± 12.7     |
| % in PSD               | 18.4 ± 8.7%          | 12.1 ± 5.7%   |

|          | Spine copy number | % of total protein | Molarity ( $\mu\text{M}$ ) | PSD copy number |
|----------|-------------------|--------------------|----------------------------|-----------------|
| Mushroom | $207.1 \pm 97.7$  | $0.0 \pm 0.0\%$    | $2.6 \pm 1.2$              | $38 \pm 17.9$   |
| Stubby   | $223.9 \pm 105.7$ | $0.0 \pm 0.0\%$    | $2.1 \pm 1.0$              | $27 \pm 12.7$   |

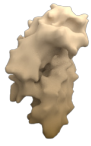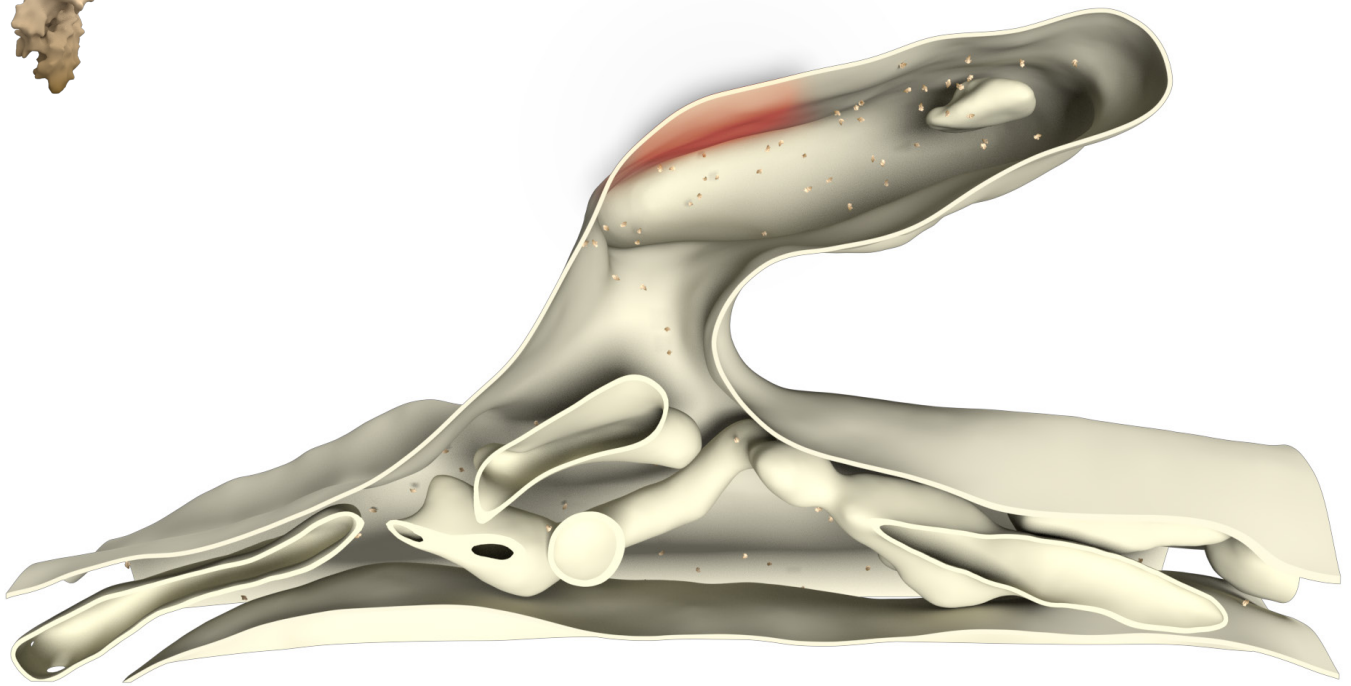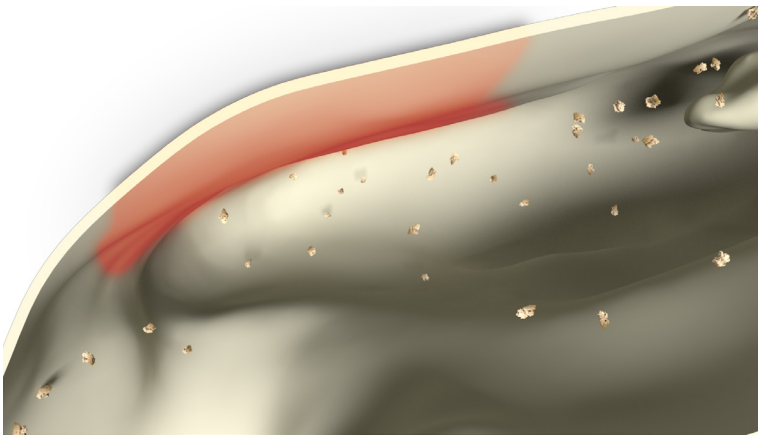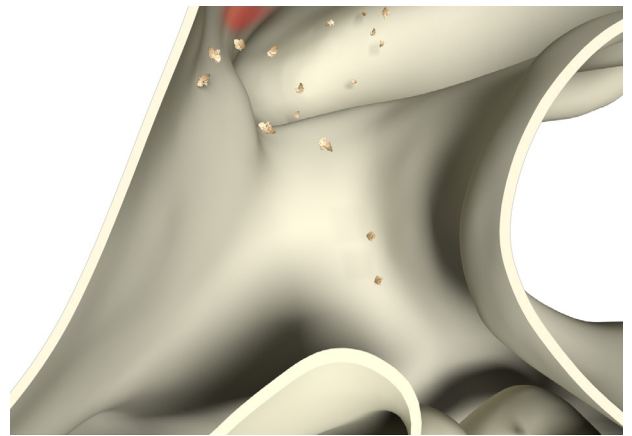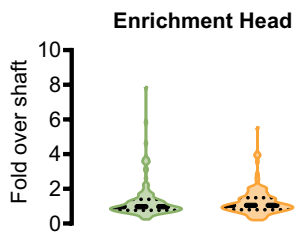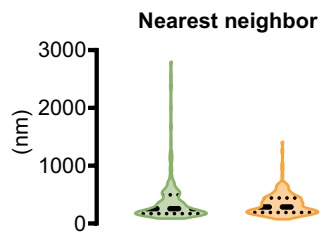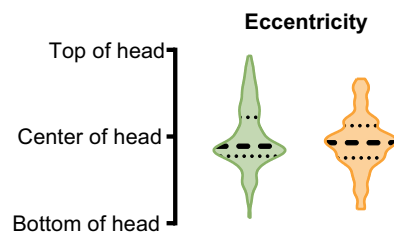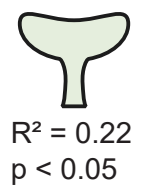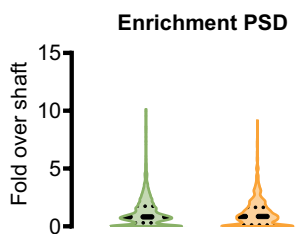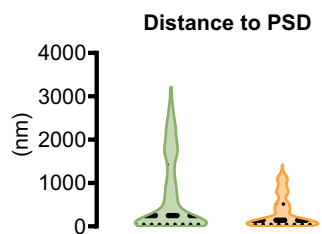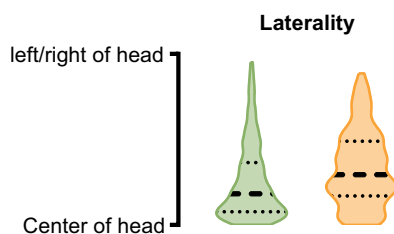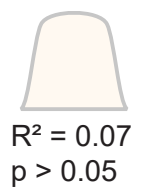

|          | Spine copy number | % of total protein | Molarity ( $\mu\text{M}$ ) | PSD copy number |
|----------|-------------------|--------------------|----------------------------|-----------------|
| Mushroom | $207.1 \pm 97.7$  | $0.0 \pm 0.0\%$    | $2.6 \pm 1.2$              | $38 \pm 17.9$   |
| Stubby   | $223.9 \pm 105.7$ | $0.0 \pm 0.0\%$    | $2.1 \pm 1.0$              | $27 \pm 12.7$   |

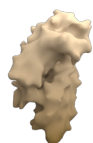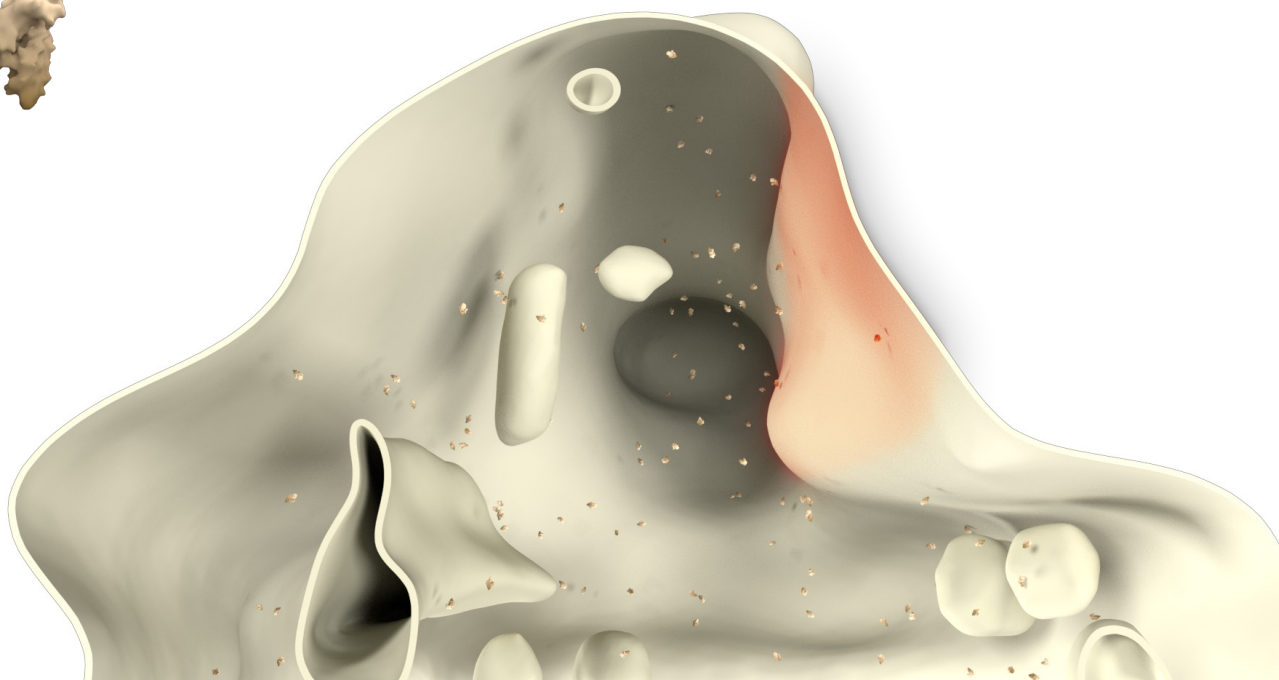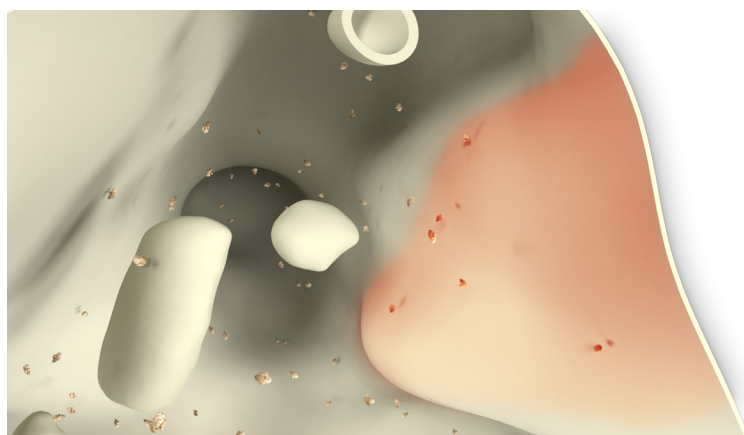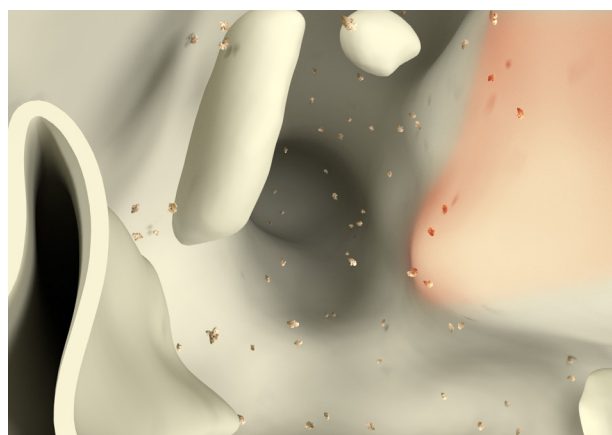

## References

**Antibody:** Atlas Antibodies HPA039475

**PDB Identifier:** 4bog

### Literature:

Bruneau and Akaaboune, 2010, J. Neurosci.

Burden et al., 1983, Cell

Gautam et al., 1995, Nature

LaRoche and Froehner, 1986, J. Biol. Chem.

Li et al., 2016, Neuron

Walker et al., 1984, EMBO J.



**Ribosomal protein L7a (Gene: Rpl7a, Uniprot ID: P62425)**

**Known function:** Translation

**Known organization:** Cytosolic, on 60S subunit

**Known Interactions:** 40S ribosomal subunit

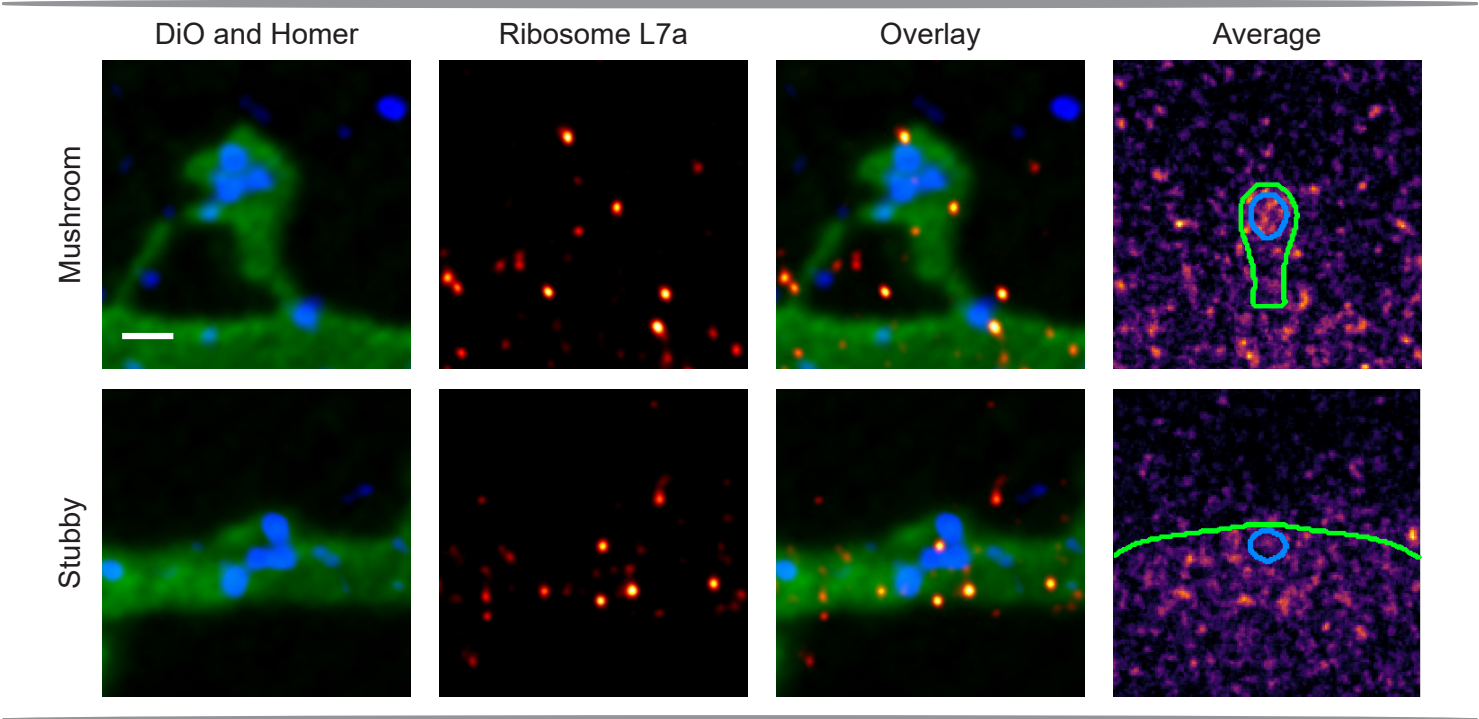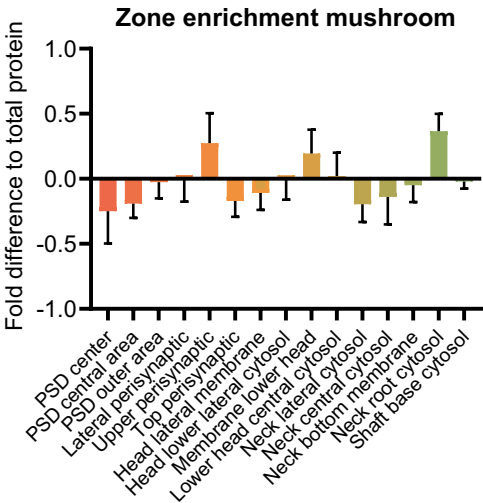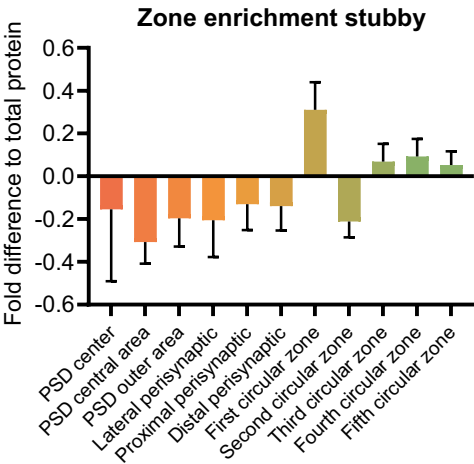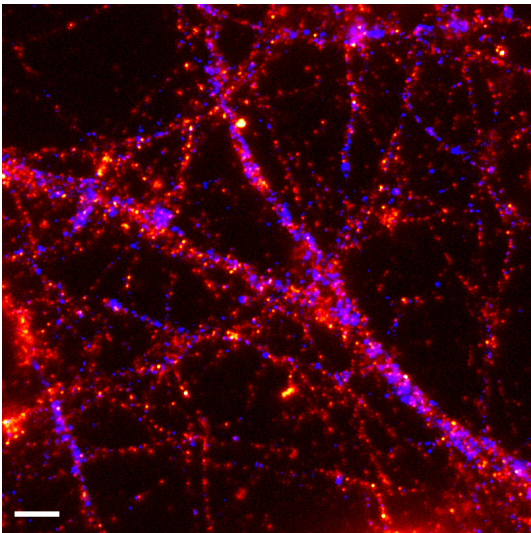

|                        |                        |               |
|------------------------|------------------------|---------------|
| Whole cell copy number | 18429434.9 ± 1939750.3 |               |
| Spine copy number      | 241.8 ± 290.7          |               |
| Function               | Organelle              |               |
|                        | Mushroom               | Stubby        |
| Spine copy number      | 206.7 ± 248.5          | 292.9 ± 352.1 |
| % of total protein     | 0.0 ± 0.0%             | 0.0 ± 0.0%    |
| Molarity (μM)          | 2.6 ± 3.2              | 2.8 ± 3.3     |
| PSD copy number        | 28 ± 33.7              | 20 ± 24.0     |
| % in PSD               | 13.5 ± 16.3%           | 6.8 ± 8.2%    |

|          | Spine copy number | % of total protein | Molarity ( $\mu\text{M}$ ) | PSD copy number |
|----------|-------------------|--------------------|----------------------------|-----------------|
| Mushroom | $206.7 \pm 248.5$ | $0.0 \pm 0.0\%$    | $2.6 \pm 3.2$              | $28 \pm 33.7$   |
| Stubby   | $292.9 \pm 352.1$ | $0.0 \pm 0.0\%$    | $2.8 \pm 3.3$              | $20 \pm 24.0$   |

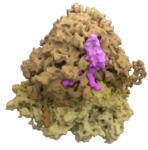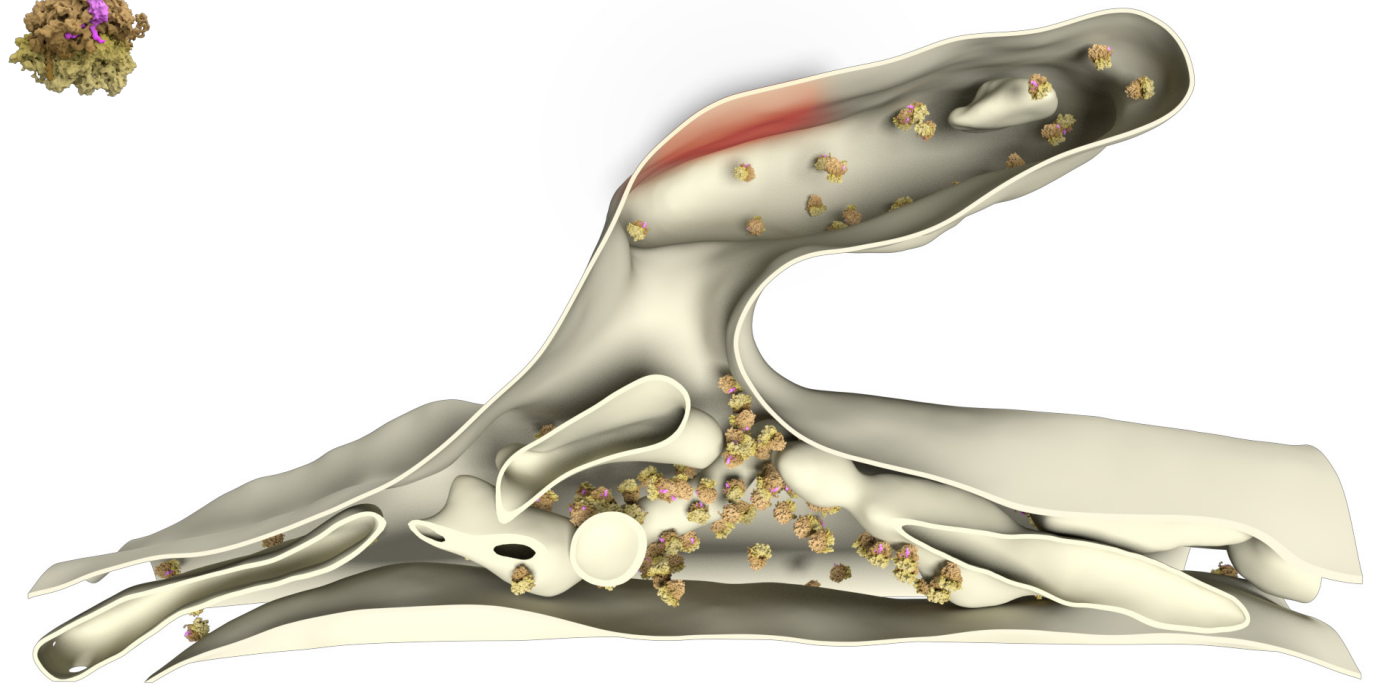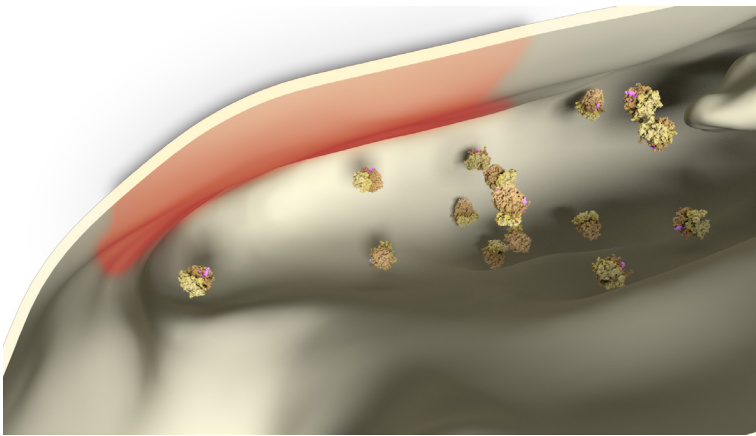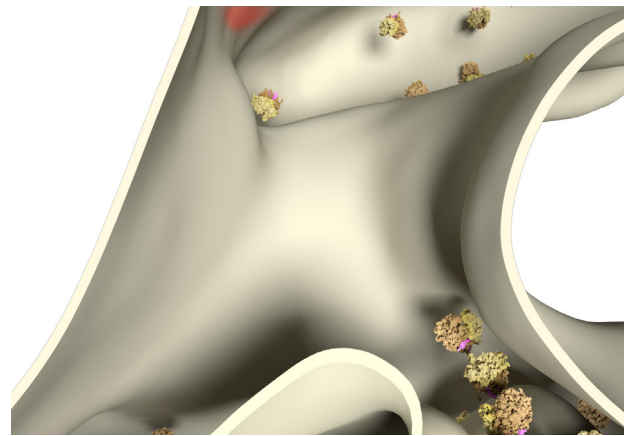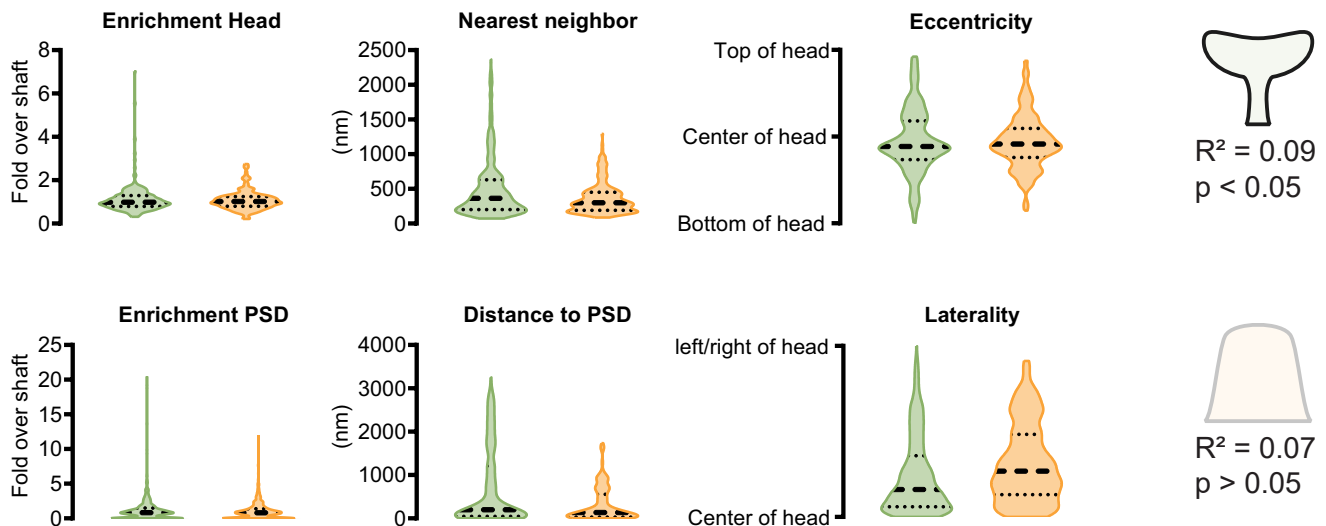

|          | Spine copy number | % of total protein | Molarity ( $\mu\text{M}$ ) | PSD copy number |
|----------|-------------------|--------------------|----------------------------|-----------------|
| Mushroom | $206.7 \pm 248.5$ | $0.0 \pm 0.0\%$    | $2.6 \pm 3.2$              | $28 \pm 33.7$   |
| Stubby   | $292.9 \pm 352.1$ | $0.0 \pm 0.0\%$    | $2.8 \pm 3.3$              | $20 \pm 24.0$   |

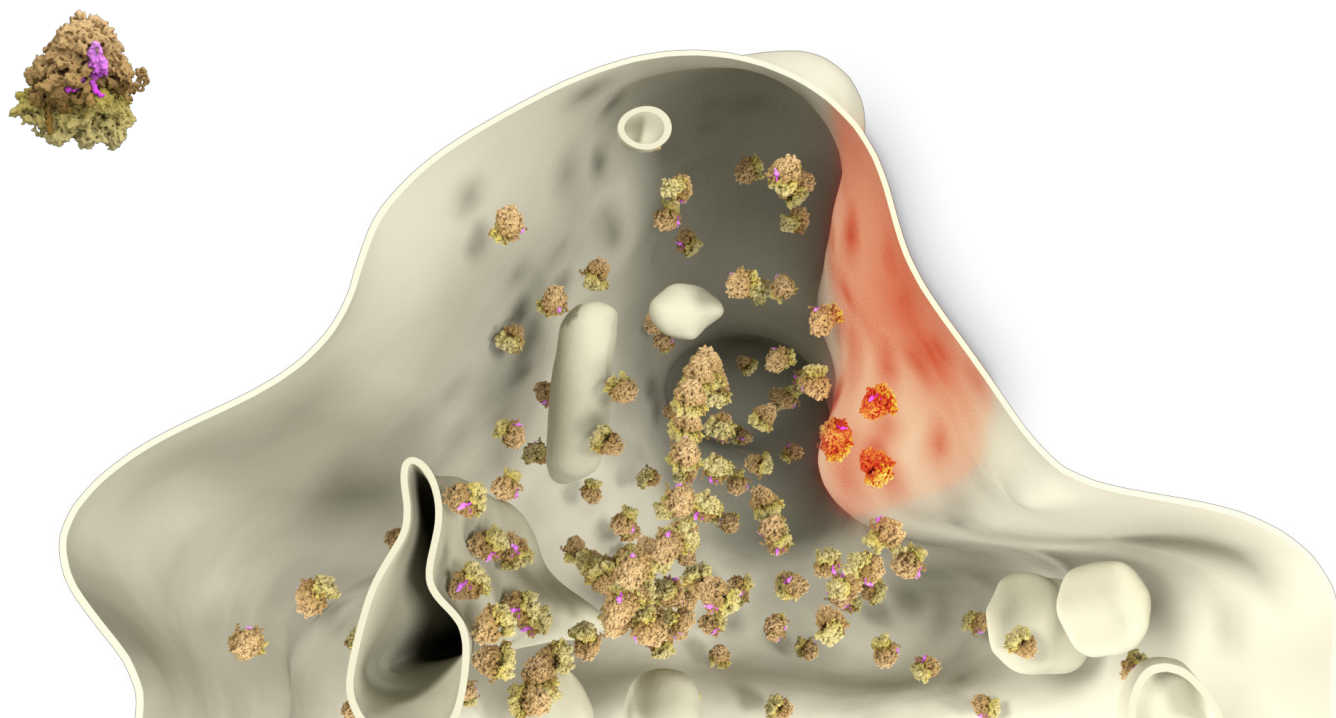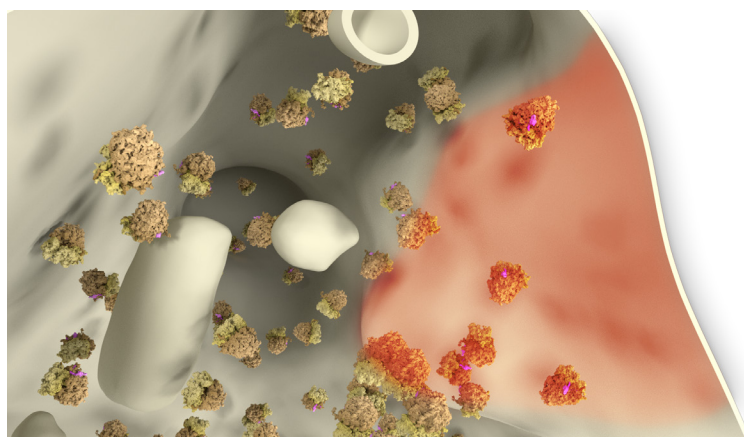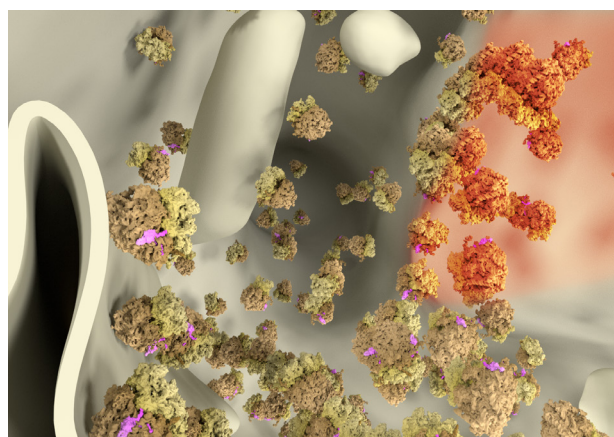

## References

**Antibody:** Cell Signaling 2403

**PDB Identifier:** 4ugo

### Literature:

Ban et al., 2014, Curr. Opin. Struct. Biol.

de la Cruz et al., 2015, Annu. Rev. Biochem.



Ribosomal protein S3 (Gene: Rps3, Uniprot ID: P62909)

**Known function:** Translation

**Known organization:** Cytosolic, on 40S subunit

**Known Interactions:** 60S ribosomal subunit

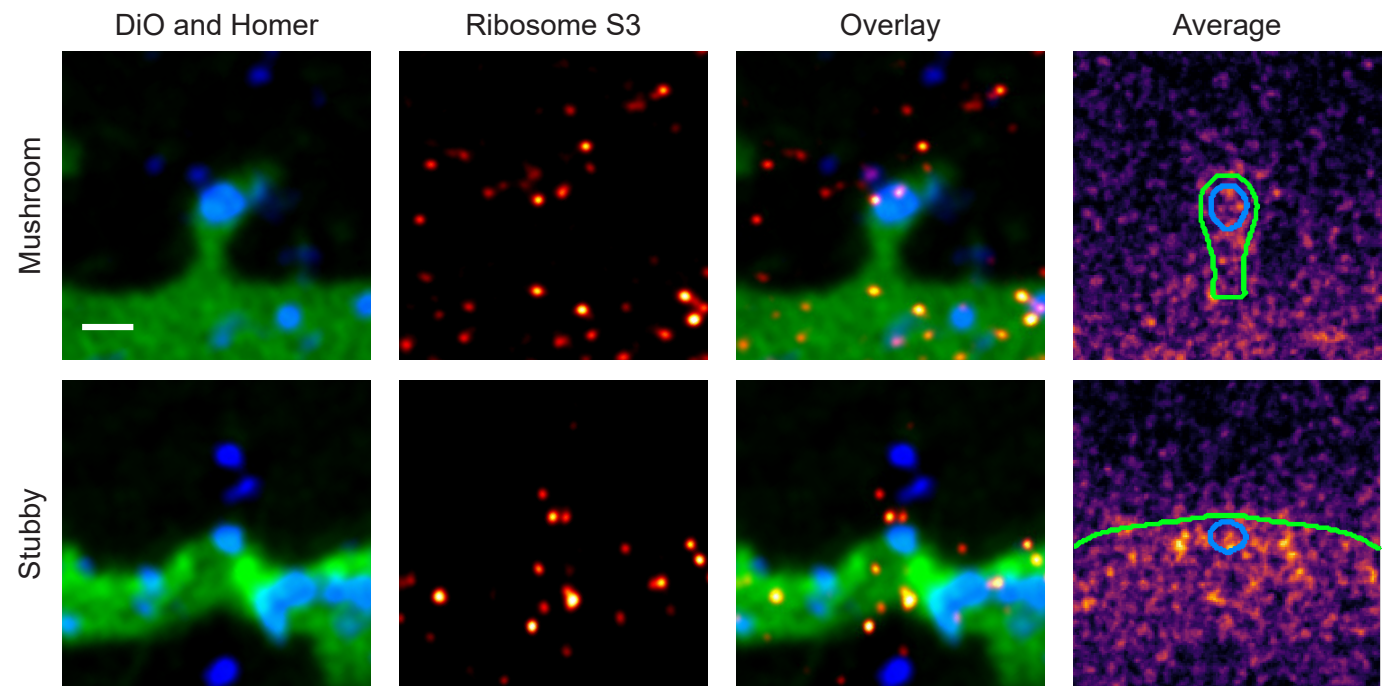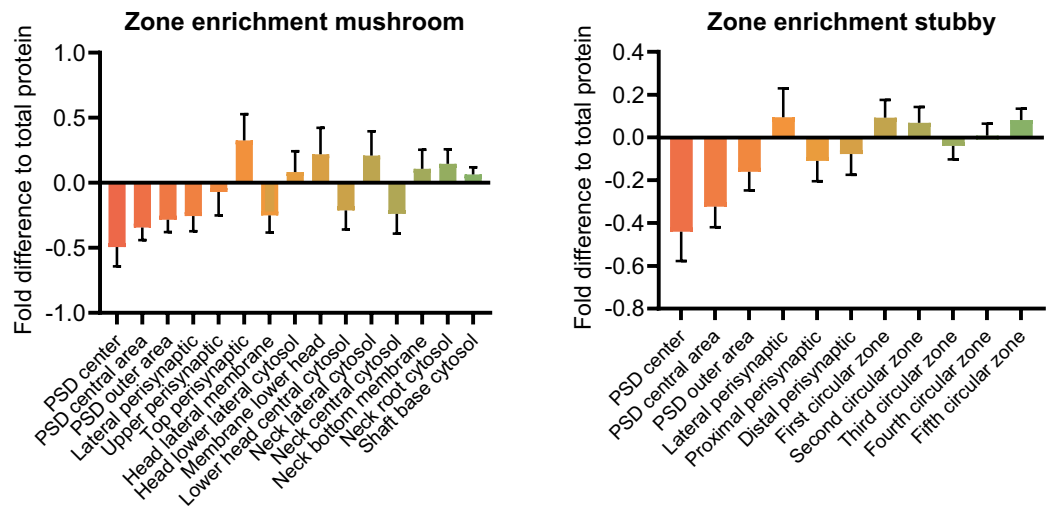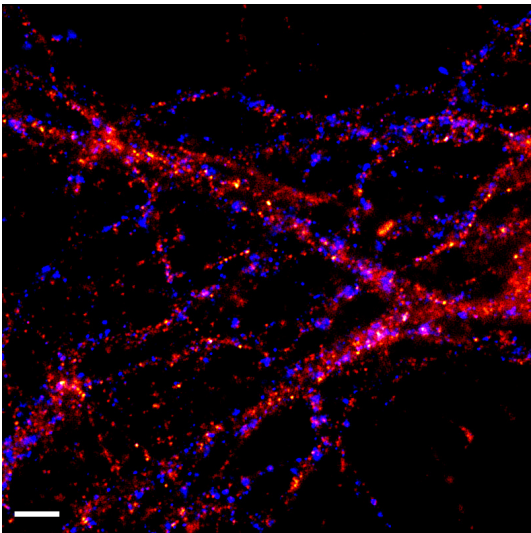

|                        |                        |                |
|------------------------|------------------------|----------------|
| Whole cell copy number | 22971897.3 ± 2234796.0 |                |
| Spine copy number      | 1675.1 ± 618.7         |                |
| Function               | Organelle              |                |
|                        | Mushroom               | Stubby         |
| Spine copy number      | 1272.8 ± 470.2         | 2221.6 ± 820.6 |
| % of total protein     | 0.2 ± 0.1%             | 0.2 ± 0.1%     |
| Molarity (µM)          | 16.2 ± 6.0             | 21.0 ± 7.8     |
| PSD copy number        | 140 ± 51.7             | 235 ± 86.8     |
| % in PSD               | 11.0 ± 4.1%            | 10.6 ± 3.9%    |

|          | Spine copy number  | % of total protein | Molarity ( $\mu\text{M}$ ) | PSD copy number |
|----------|--------------------|--------------------|----------------------------|-----------------|
| Mushroom | $1272.8 \pm 470.2$ | $0.2 \pm 0.1\%$    | $16.2 \pm 6.0$             | $140 \pm 51.7$  |
| Stubby   | $2221.6 \pm 820.6$ | $0.2 \pm 0.1\%$    | $21.0 \pm 7.8$             | $235 \pm 86.8$  |

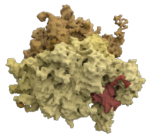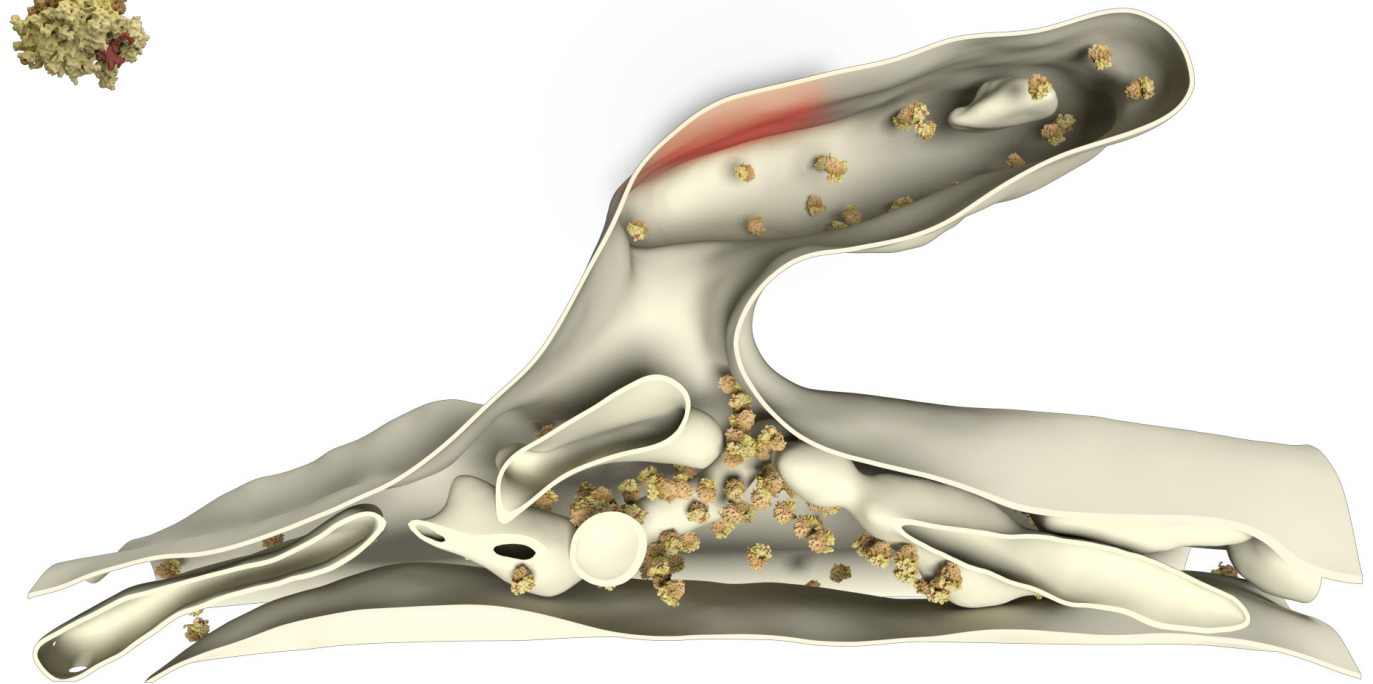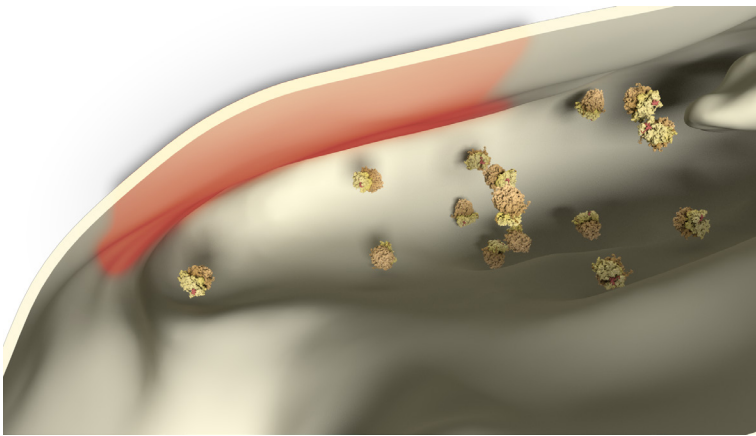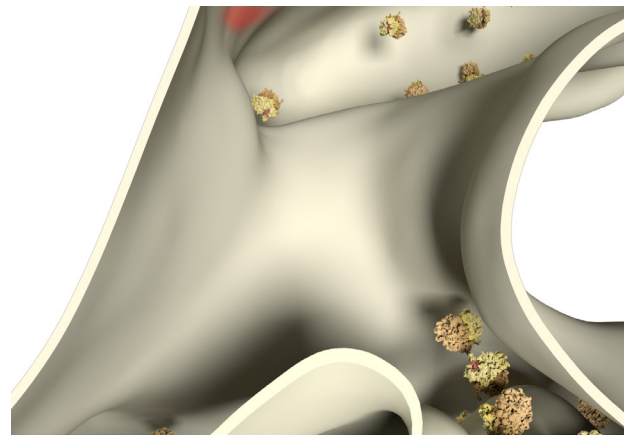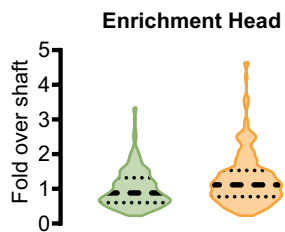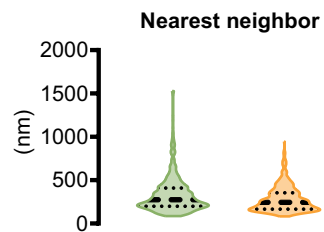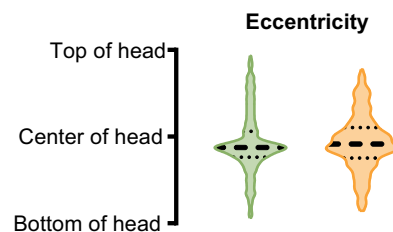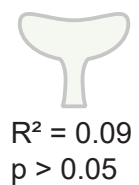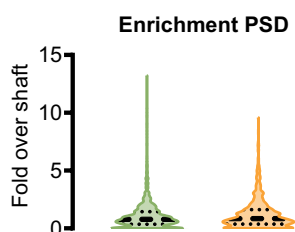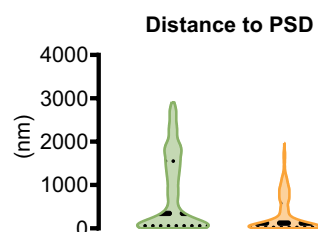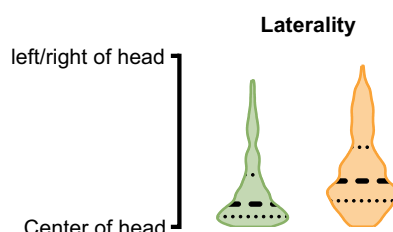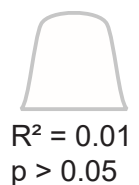

|          | Spine copy number  | % of total protein | Molarity ( $\mu\text{M}$ ) | PSD copy number |
|----------|--------------------|--------------------|----------------------------|-----------------|
| Mushroom | $1272.8 \pm 470.2$ | $0.2 \pm 0.1\%$    | $16.2 \pm 6.0$             | $140 \pm 51.7$  |
| Stubby   | $2221.6 \pm 820.6$ | $0.2 \pm 0.1\%$    | $21.0 \pm 7.8$             | $235 \pm 86.8$  |

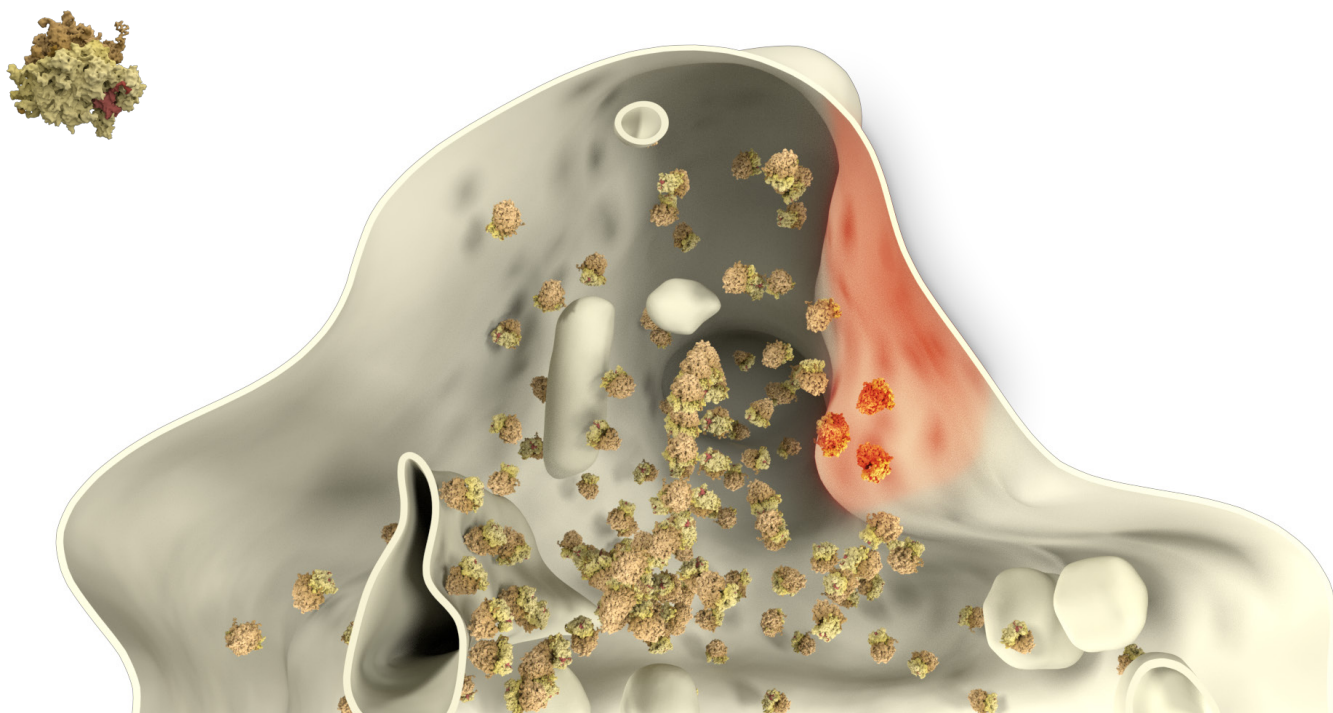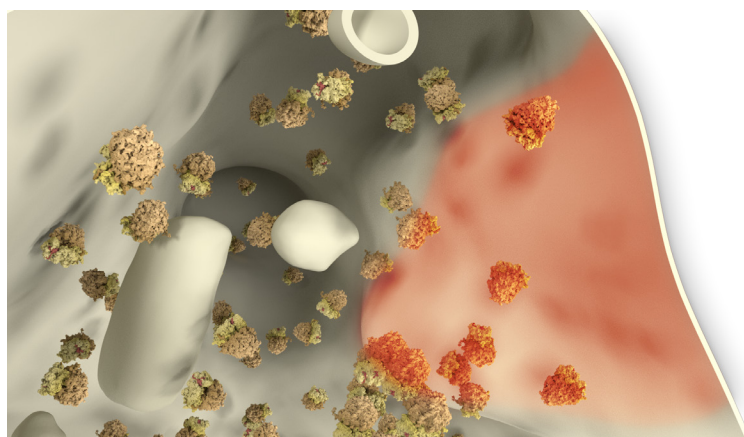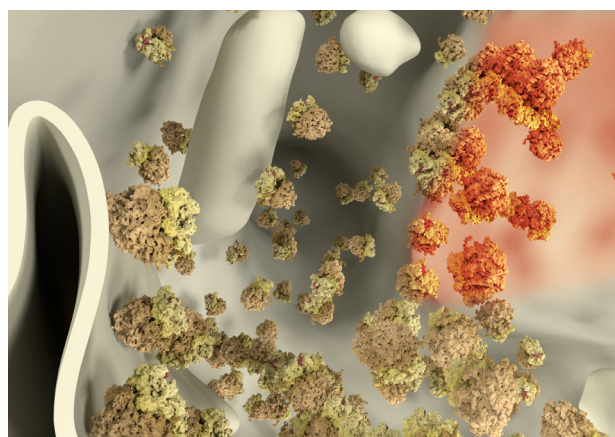

## References

**Antibody:** Cell Signaling 9538

**PDB Identifier:** 4ugo

### Literature:

Ban et al., 2014, Curr. Opin. Struct. Biol.

de la Cruz et al., 2015, Annu. Rev. Biochem.



Ribosomal protein S6 (Gene: Rps6, Uniprot ID: P62755)

**Known function:** Translation

**Known organization:** Cytosolic, on 40S subunit

**Known Interactions:** 60S ribosomal subunit

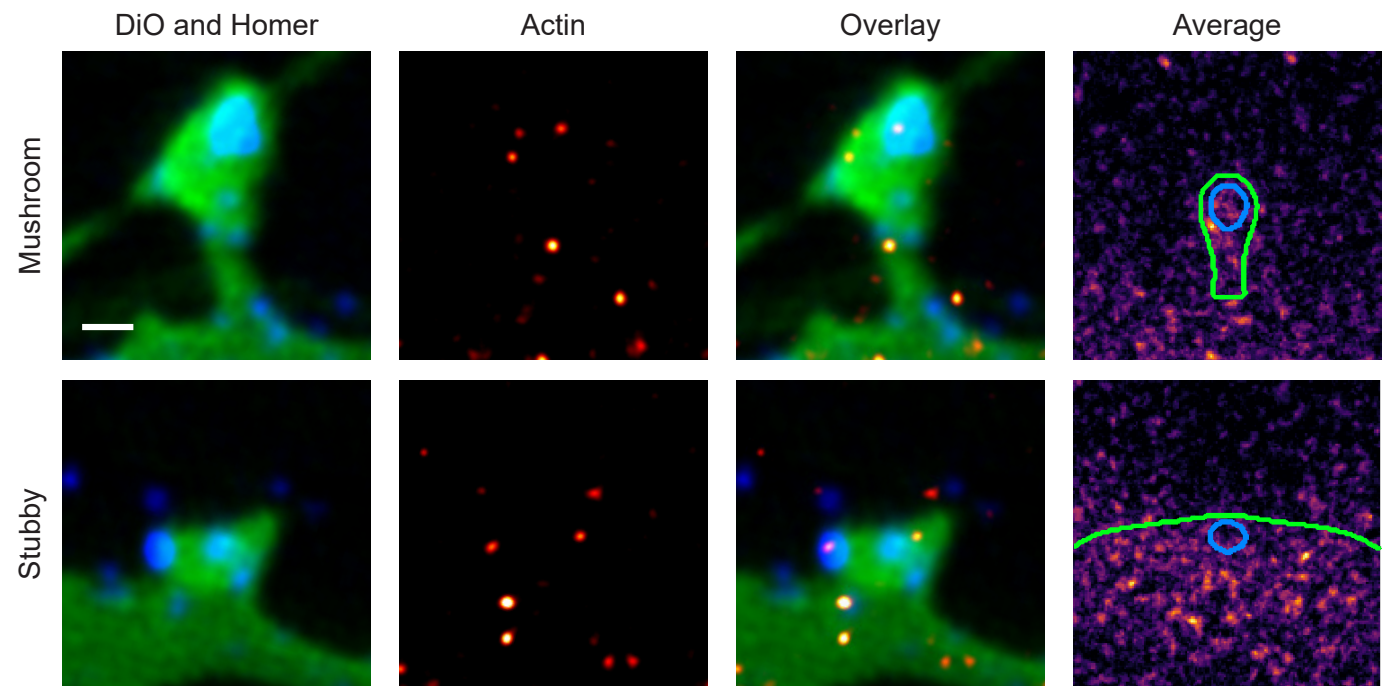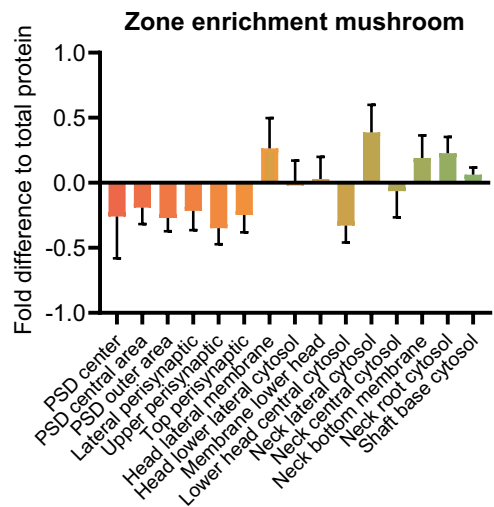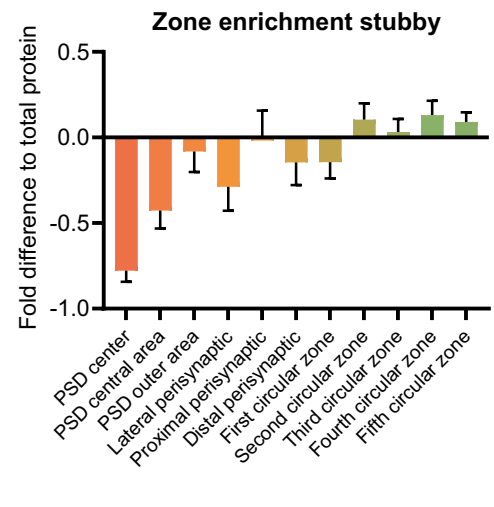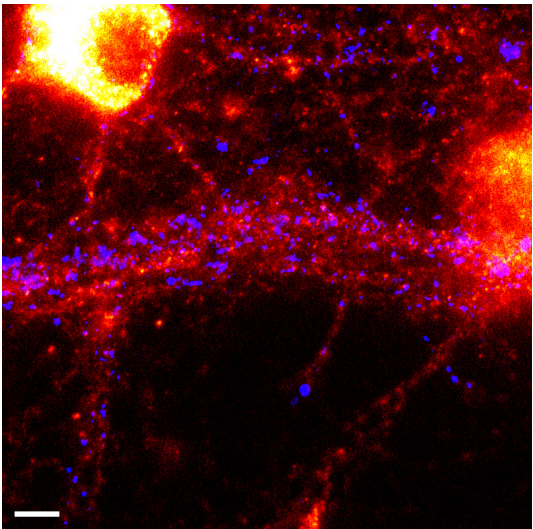

|                        |                        |              |
|------------------------|------------------------|--------------|
| Whole cell copy number | 23885770.5 ± 2685969.5 |              |
| Spine copy number      | not detected           |              |
| Function               | Organelle              |              |
|                        | Mushroom               | Stubby       |
| Spine copy number      | not detected           | not detected |
| % of total protein     | not detected           | not detected |
| Molarity (µM)          | not detected           | not detected |
| PSD copy number        | not detected           | not detected |
| % in PSD               | not detected           | not detected |

|          | Spine copy number | % of total protein | Molarity ( $\mu\text{M}$ ) | PSD copy number |
|----------|-------------------|--------------------|----------------------------|-----------------|
| Mushroom | not detected      | not detected       | not detected               | not detected    |
| Stubby   | not detected      | not detected       | not detected               | not detected    |

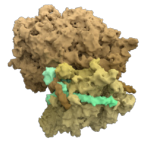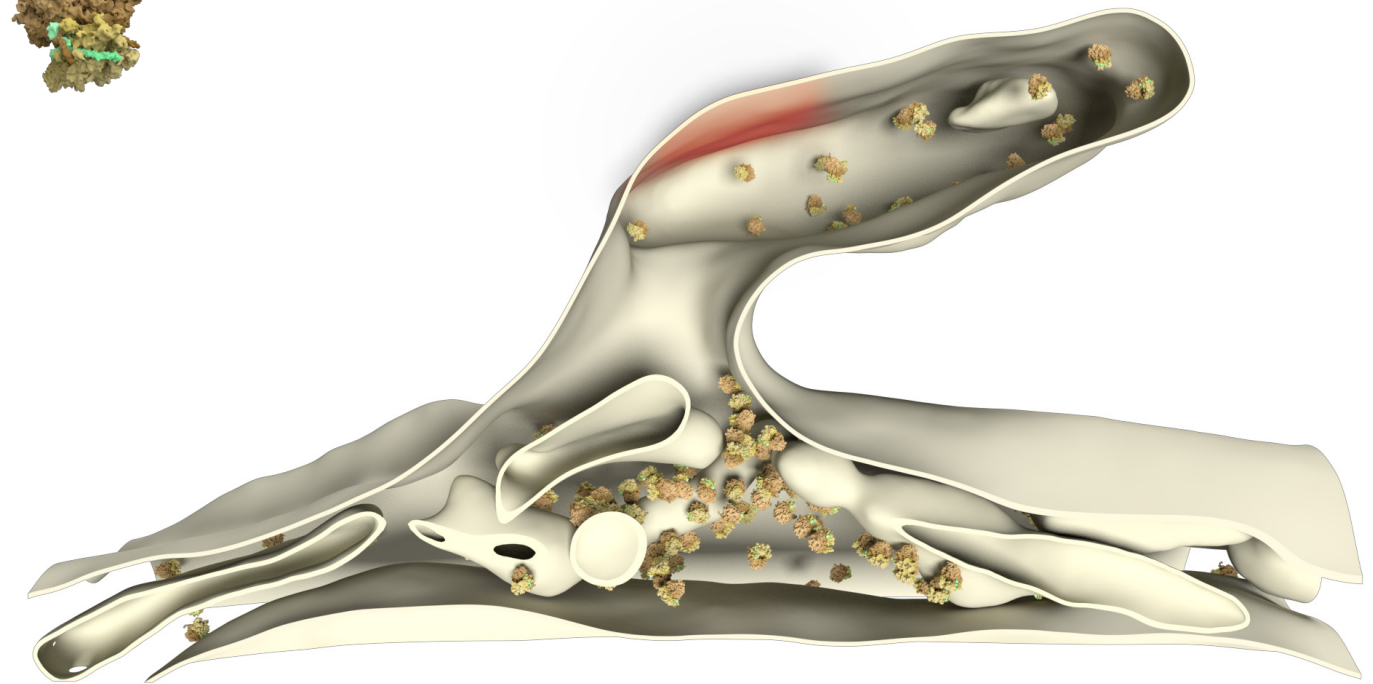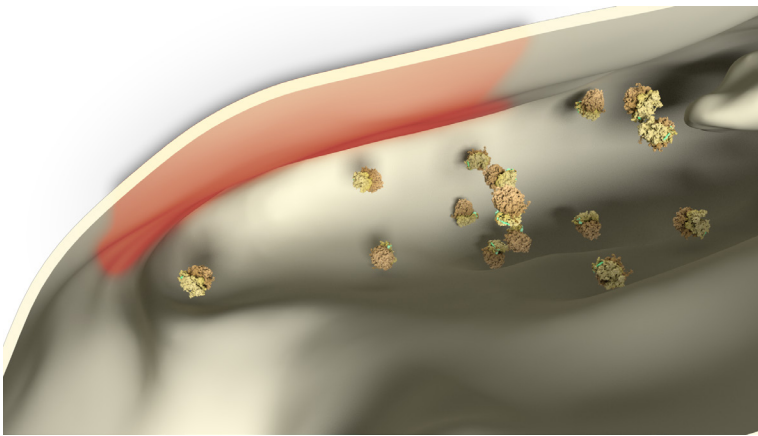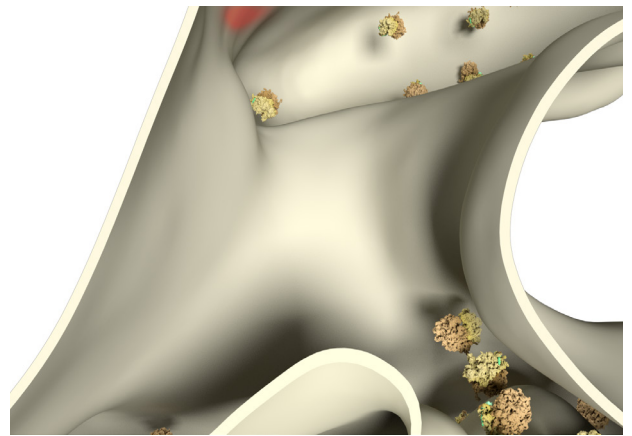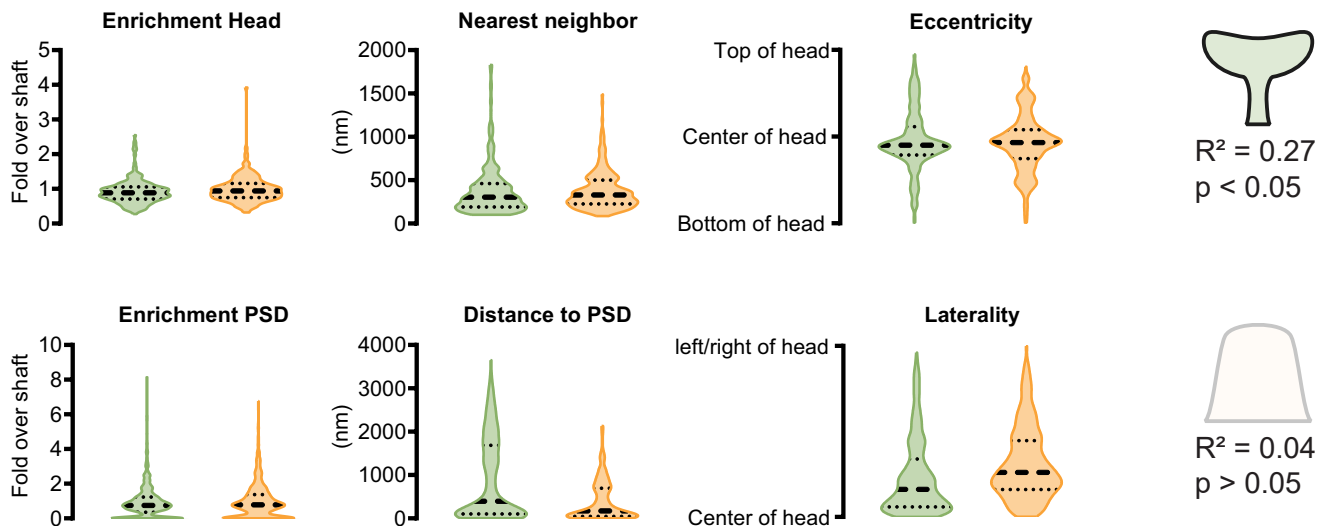

|          | Spine copy number | % of total protein | Molarity ( $\mu\text{M}$ ) | PSD copy number |
|----------|-------------------|--------------------|----------------------------|-----------------|
| Mushroom | not detected      | not detected       | not detected               | not detected    |
| Stubby   | not detected      | not detected       | not detected               | not detected    |

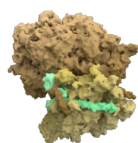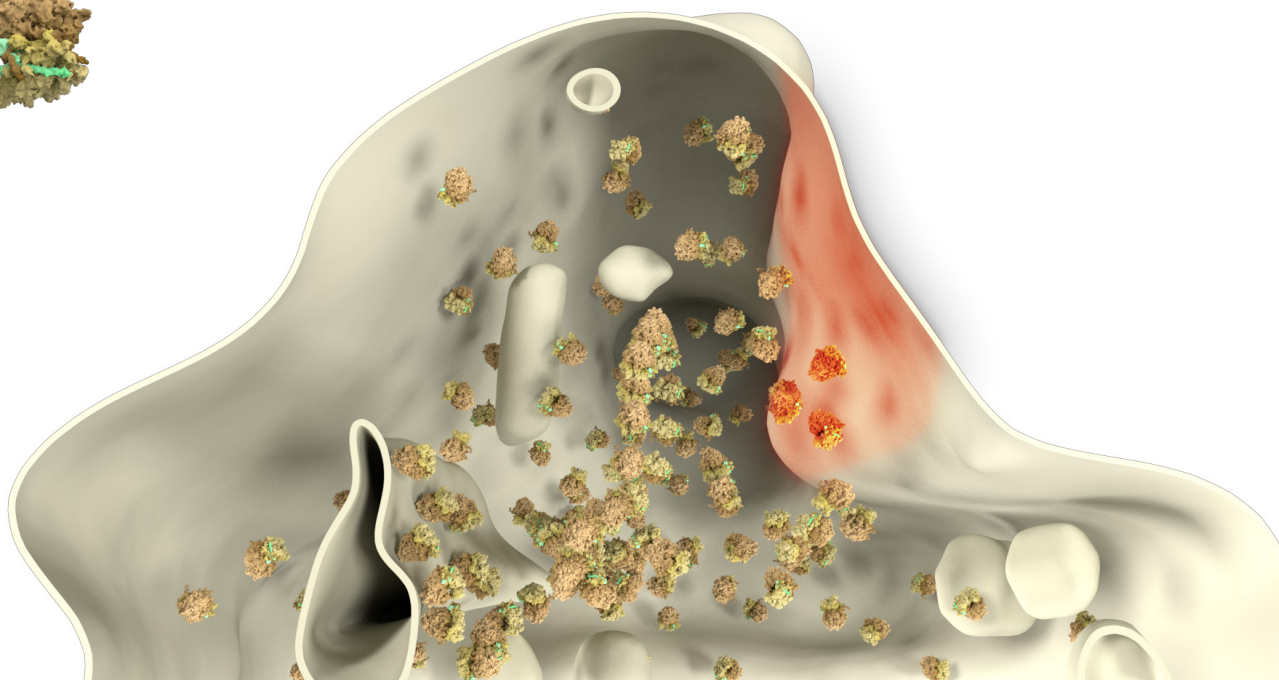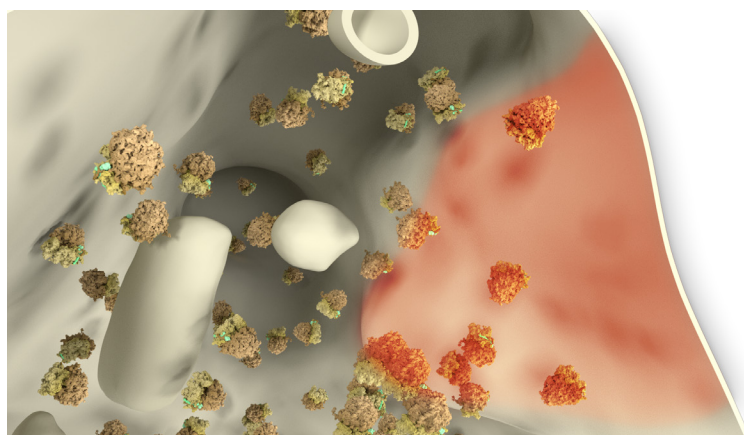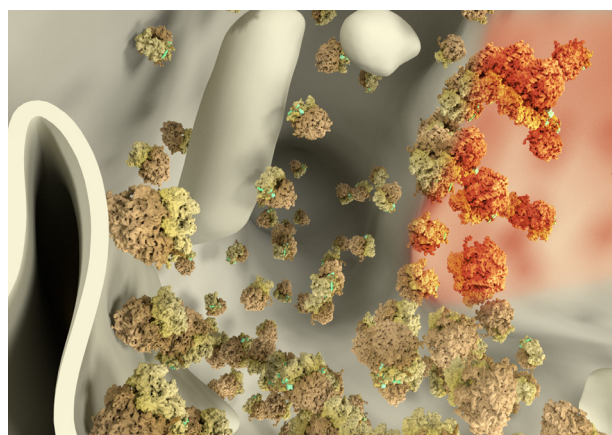

## References

**Antibody:** Cell Signaling 2217

**PDB Identifier:** 4ugo

### Literature:

Ban et al., 2014, Curr. Opin. Struct. Biol.

de la Cruz et al., 2015, Annu. Rev. Biochem.



## Sec22b (ERS24, Gene: Sec22b, Uniprot ID: Q4KM74)

**Known function:** R-SNARE, Antero- and retrograde ER-Golgi transport, Homotypic COPII vesicle fusion, Delivery of NMDAR and GABAAR to PM

**Known organization:** Transmembrane proteine, ER, Golgi and ERGIC

**Known Interactions:** Syntaxin1, Syntaxin5

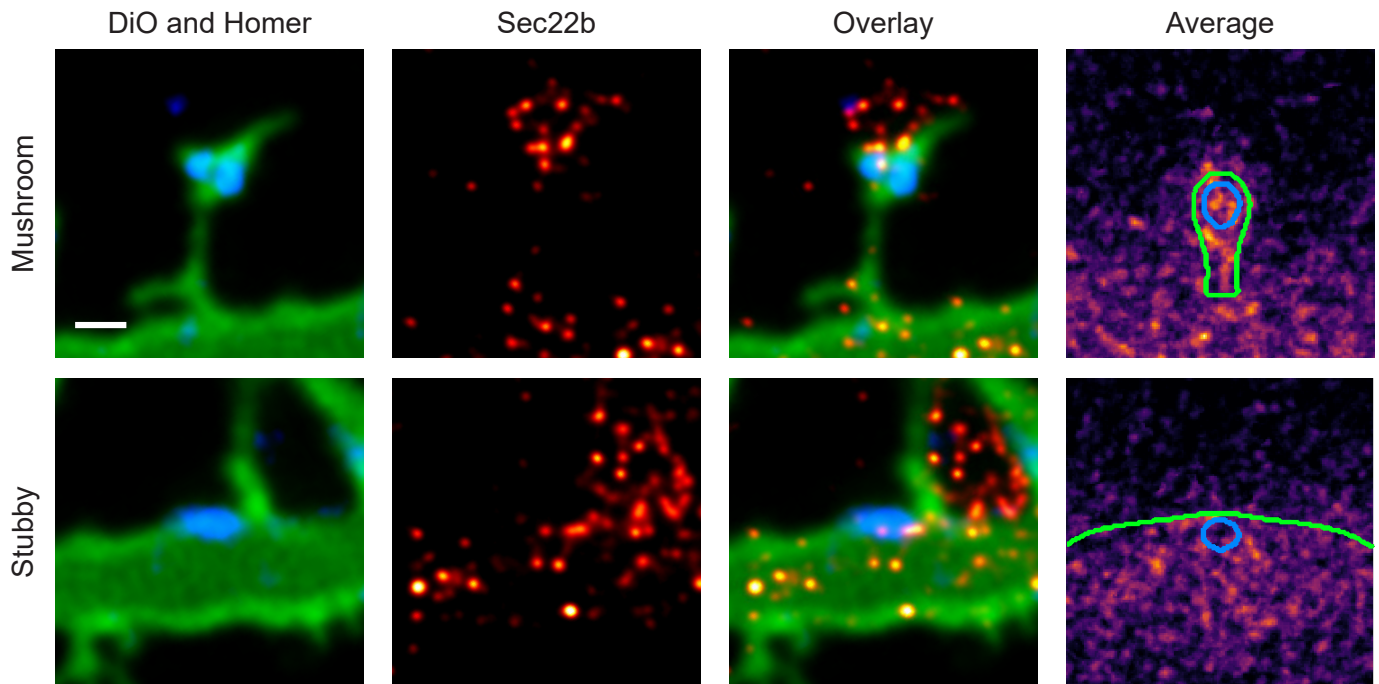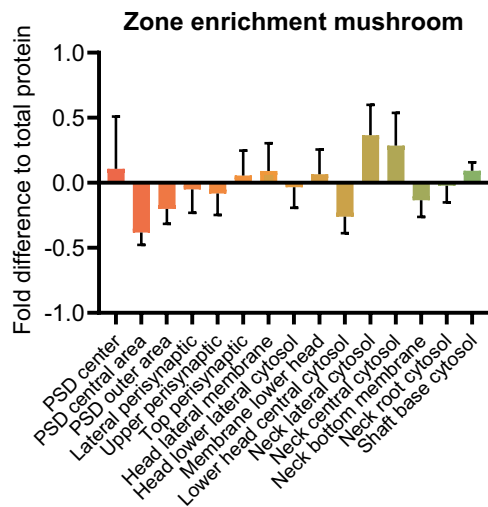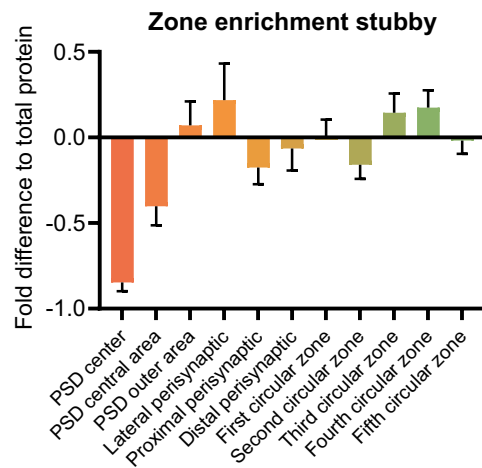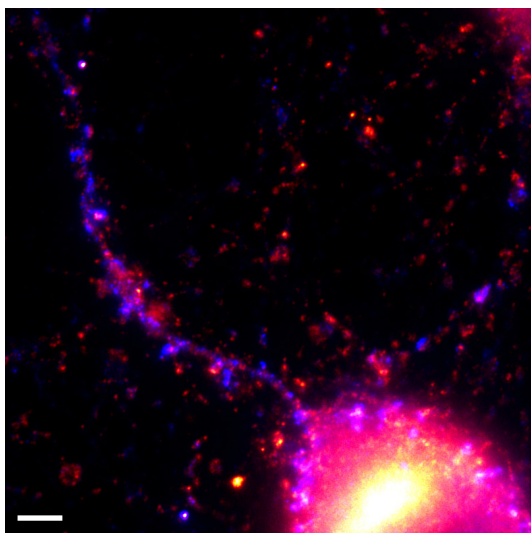

|                        |                            |               |
|------------------------|----------------------------|---------------|
| Whole cell copy number | 8033640.6 ± 672775.5       |               |
| Spine copy number      | 321.1 ± 214.8              |               |
| Function               | SNAREs and assoc. proteins |               |
|                        | Mushroom                   | Stubby        |
| Spine copy number      | 304.7 ± 203.9              | 371.1 ± 248.3 |
| % of total protein     | 0.0 ± 0.0%                 | 0.0 ± 0.0%    |
| Molarity (μM)          | 3.9 ± 2.6                  | 3.5 ± 2.3     |
| PSD copy number        | 8 ± 5.4                    | 10 ± 6.7      |
| % in PSD               | 2.6 ± 1.8%                 | 2.7 ± 1.8%    |

|          | Spine copy number | % of total protein | Molarity ( $\mu\text{M}$ ) | PSD copy number |
|----------|-------------------|--------------------|----------------------------|-----------------|
| Mushroom | $304.7 \pm 203.9$ | $0.0 \pm 0.0\%$    | $3.9 \pm 2.6$              | $8 \pm 5.4$     |
| Stubby   | $371.1 \pm 248.3$ | $0.0 \pm 0.0\%$    | $3.5 \pm 2.3$              | $10 \pm 6.7$    |

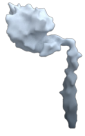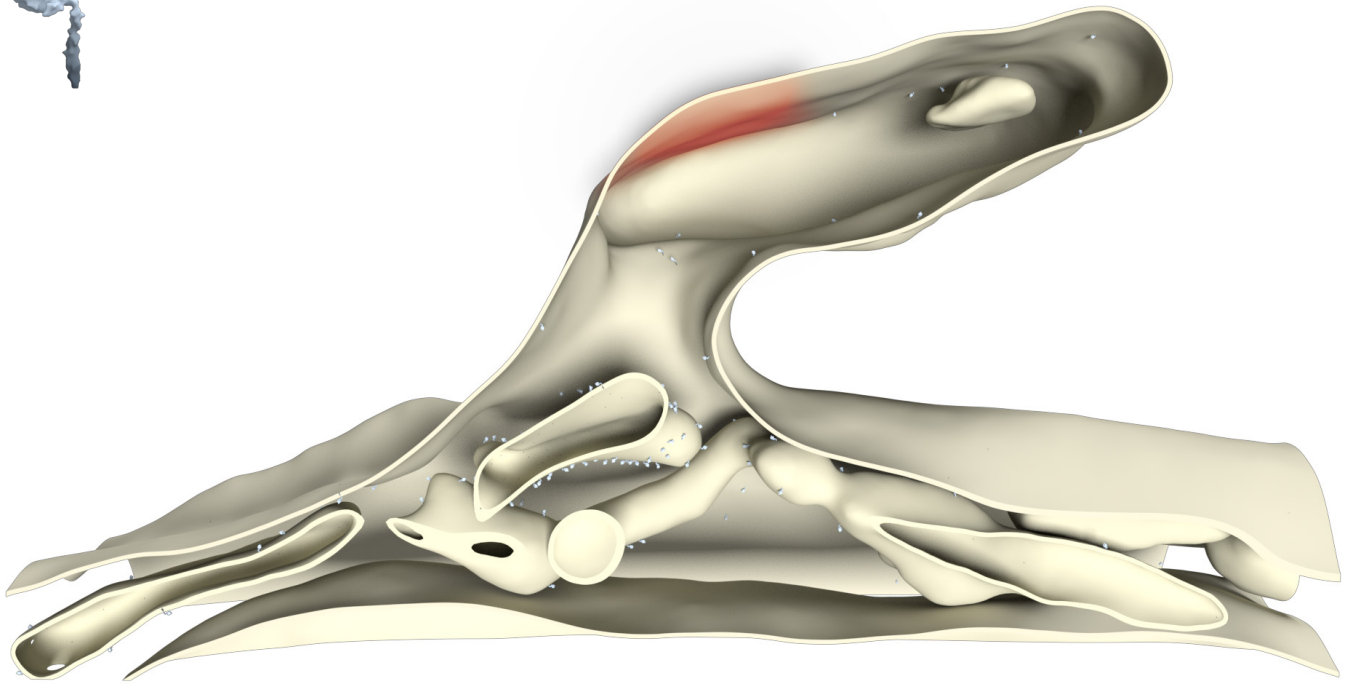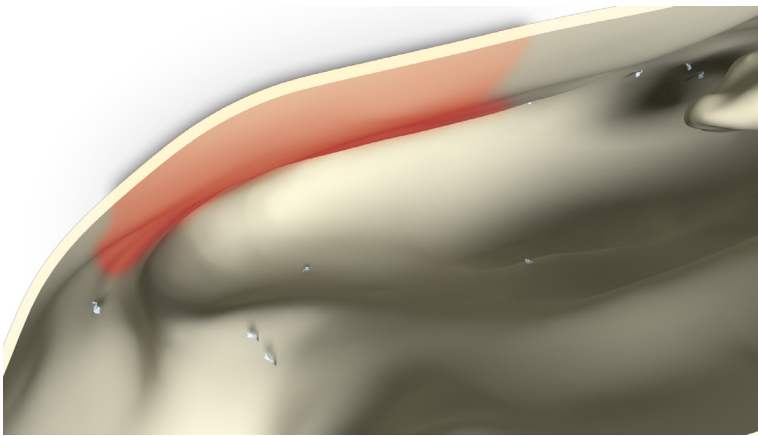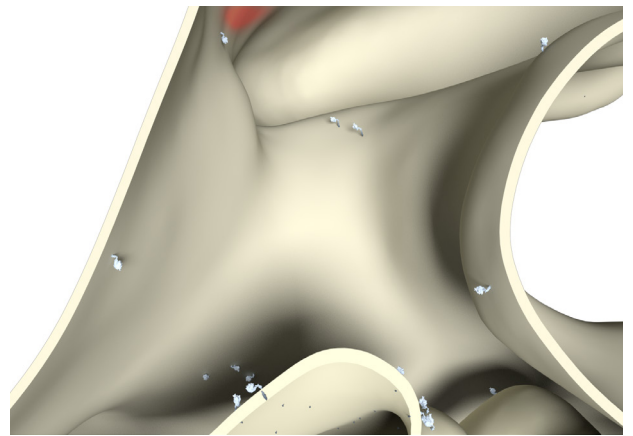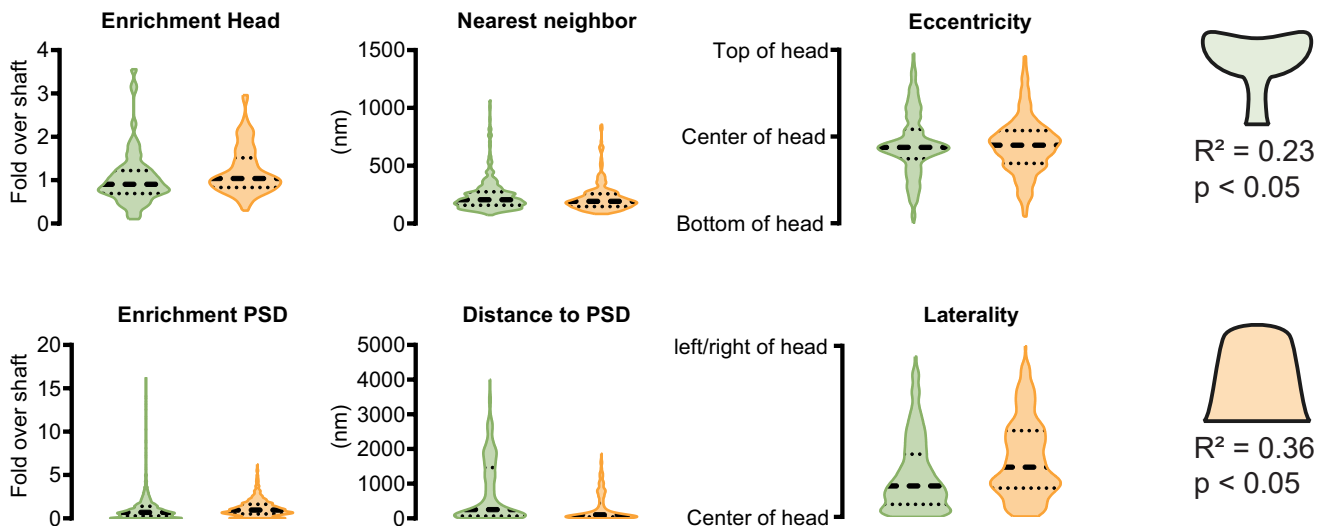

|          | Spine copy number | % of total protein | Molarity ( $\mu\text{M}$ ) | PSD copy number |
|----------|-------------------|--------------------|----------------------------|-----------------|
| Mushroom | $304.7 \pm 203.9$ | $0.0 \pm 0.0\%$    | $3.9 \pm 2.6$              | $8 \pm 5.4$     |
| Stubby   | $371.1 \pm 248.3$ | $0.0 \pm 0.0\%$    | $3.5 \pm 2.3$              | $10 \pm 6.7$    |

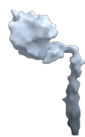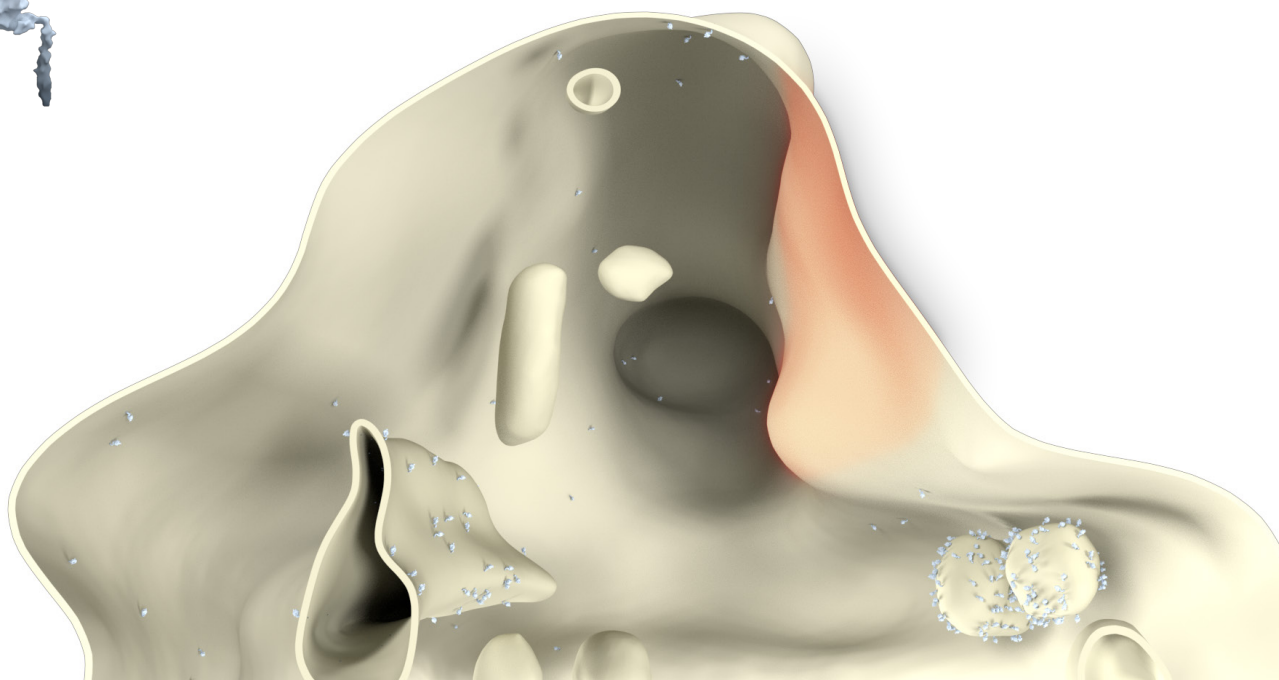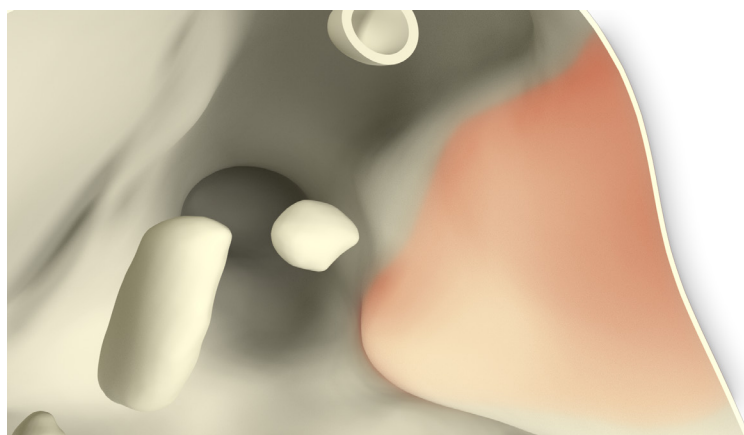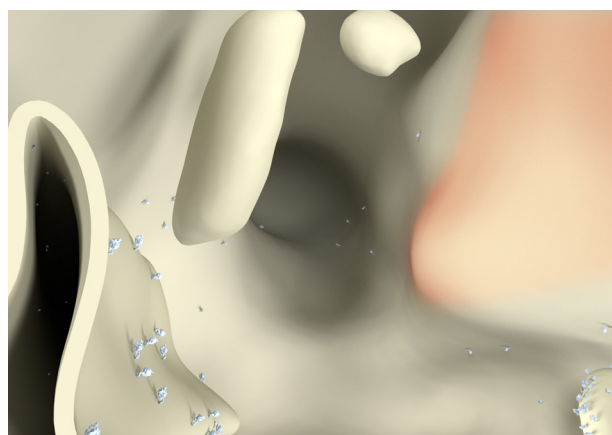

## References

**Antibody:** Synaptic Systems 186 003

**PDB Identifier:** 5vno

### Literature:

Burri et al., 2003, Proc. Natl. Acad. Sci. U S A

Gu et al., 2016, Proc. Natl. Acad. Sci. U S A

Hay et al., 1997, Cell

Lewis et al., 1997, EMBO J.

McNew et al., 2000, Nature

Washbourne, 2004, J. Neurosci.

Zhang et al., 1997, J. Cell. Biol.

Zhang et al., 1999, Mol. Biol. Cell.



Septin7 (Gene: Sept7, Uniprot ID: Q9WVC0)

**Known function:** Restricts diffusion at spine neck, Regulates spine morphology, Stabilizes PSD95 in spines

**Known organization:** Cytosolic, Forms arc or ring-like structures

**Known Interactions:** None

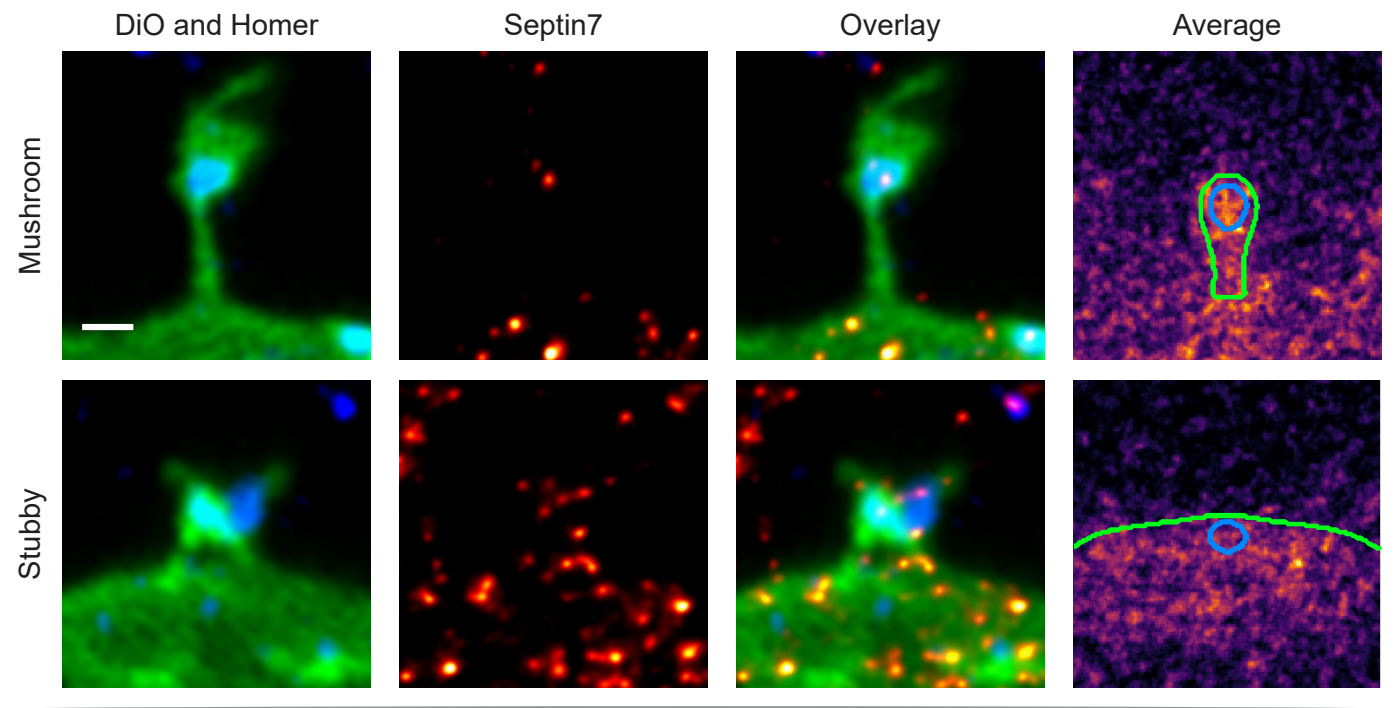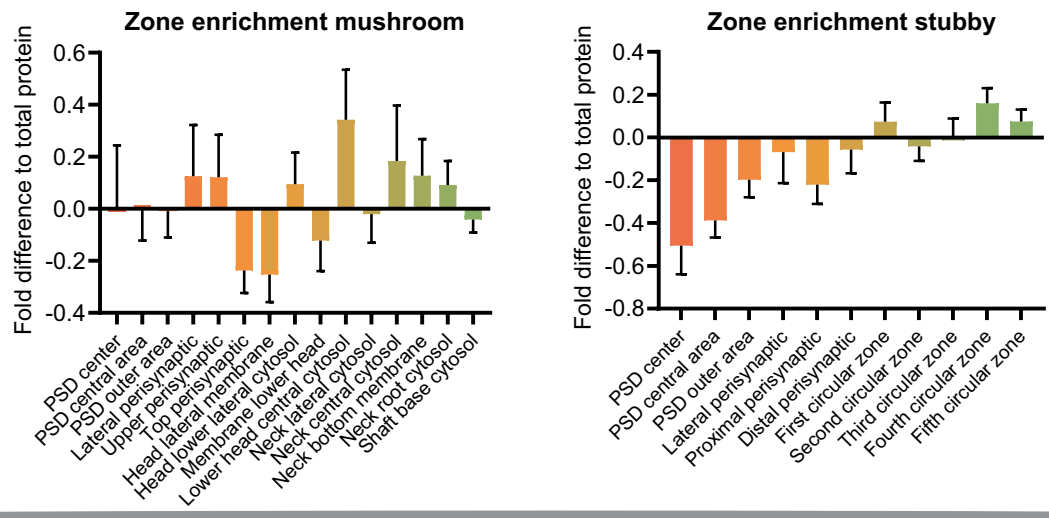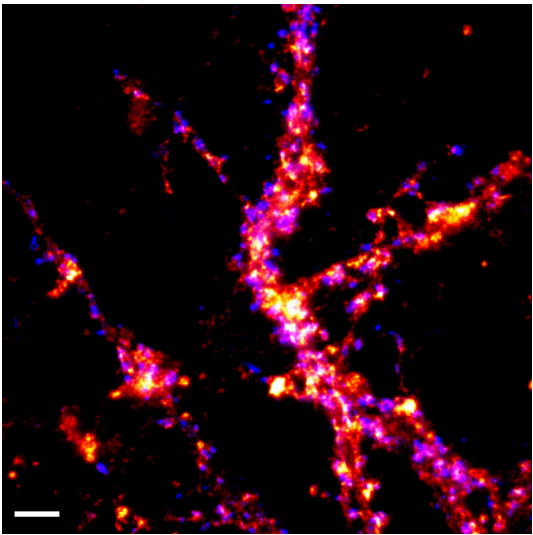

|                        |                      |               |
|------------------------|----------------------|---------------|
| Whole cell copy number | 4149665.7 ± 474108.6 |               |
| Spine copy number      | 838.2 ± 231.6        |               |
| Function               | Cytoskeleton         |               |
|                        | Mushroom             | Stubby        |
| Spine copy number      | 666.1 ± 184.1        | 986.2 ± 272.6 |
| % of total protein     | 0.2 ± 0.0%           | 0.2 ± 0.1%    |
| Molarity (µM)          | 8.5 ± 2.3            | 9.3 ± 2.6     |
| PSD copy number        | 109 ± 30.1           | 83 ± 22.9     |
| % in PSD               | 16.4 ± 4.5%          | 8.4 ± 2.3%    |

|          | Spine copy number | % of total protein | Molarity ( $\mu\text{M}$ ) | PSD copy number |
|----------|-------------------|--------------------|----------------------------|-----------------|
| Mushroom | $666.1 \pm 184.1$ | $0.2 \pm 0.0\%$    | $8.5 \pm 2.3$              | $109 \pm 30.1$  |
| Stubby   | $986.2 \pm 272.6$ | $0.2 \pm 0.1\%$    | $9.3 \pm 2.6$              | $83 \pm 22.9$   |

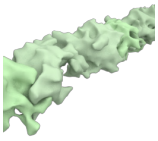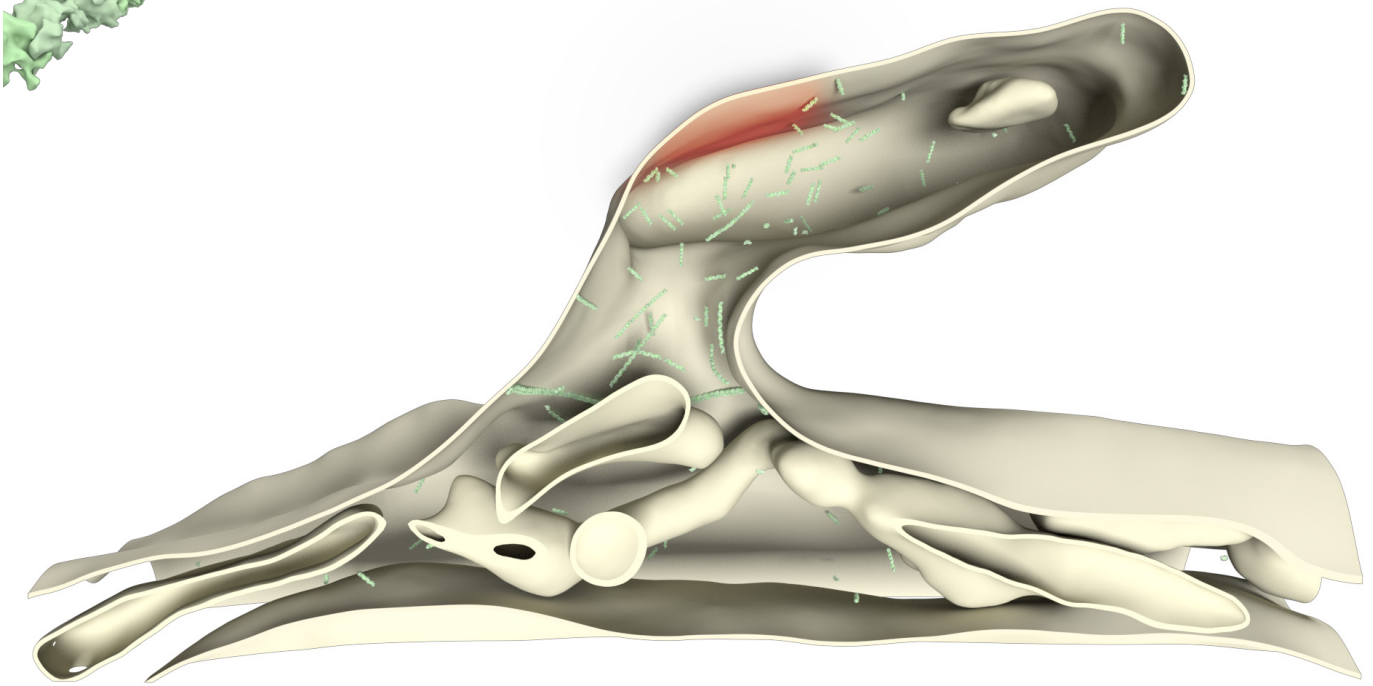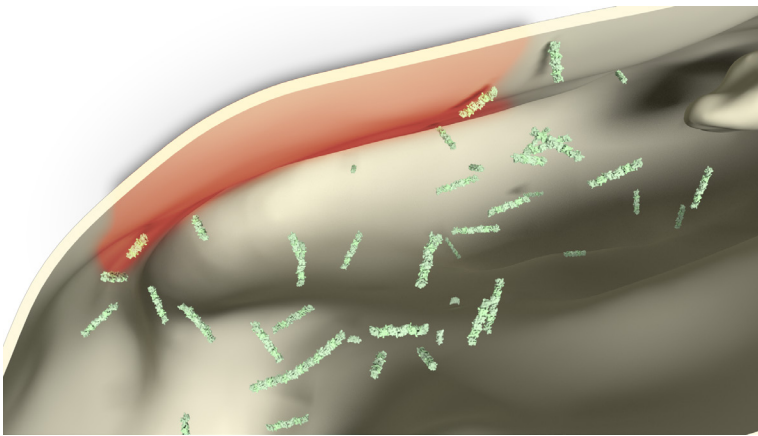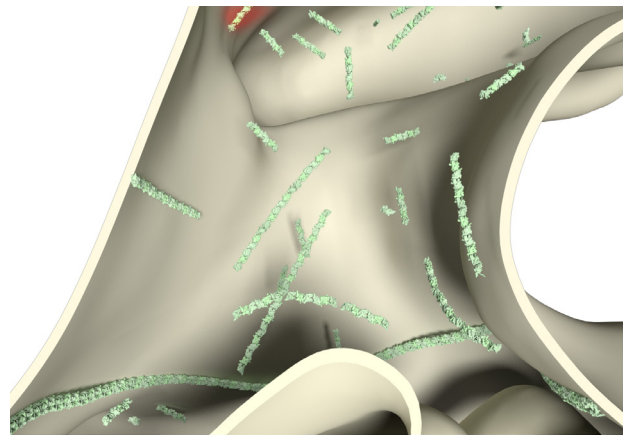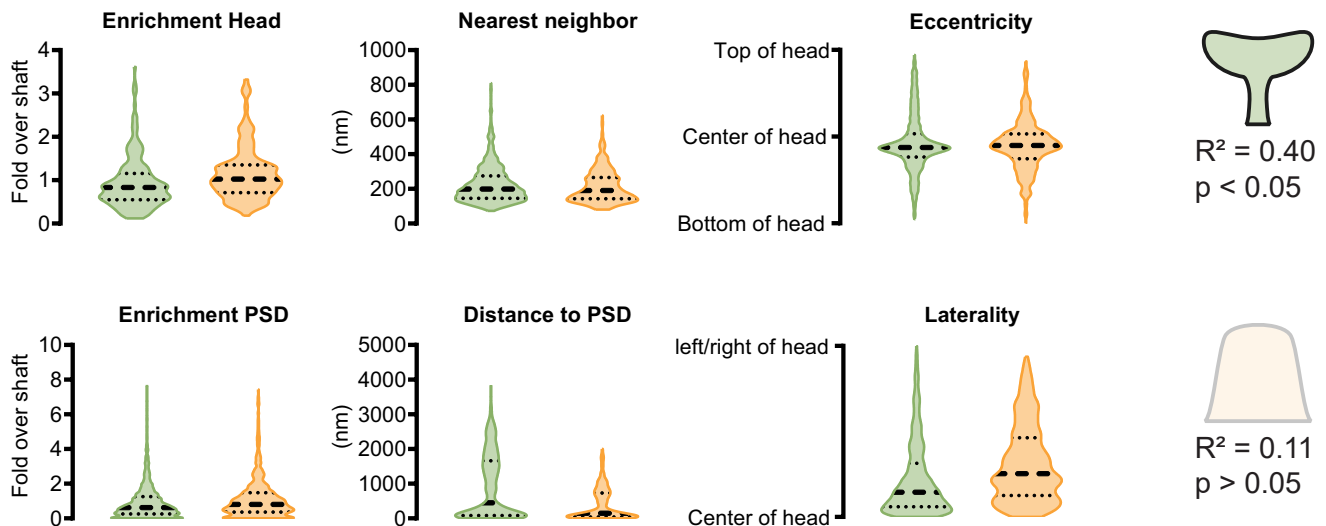

|          | Spine copy number | % of total protein | Molarity ( $\mu\text{M}$ ) | PSD copy number |
|----------|-------------------|--------------------|----------------------------|-----------------|
| Mushroom | $666.1 \pm 184.1$ | $0.2 \pm 0.0\%$    | $8.5 \pm 2.3$              | $109 \pm 30.1$  |
| Stubby   | $986.2 \pm 272.6$ | $0.2 \pm 0.1\%$    | $9.3 \pm 2.6$              | $83 \pm 22.9$   |

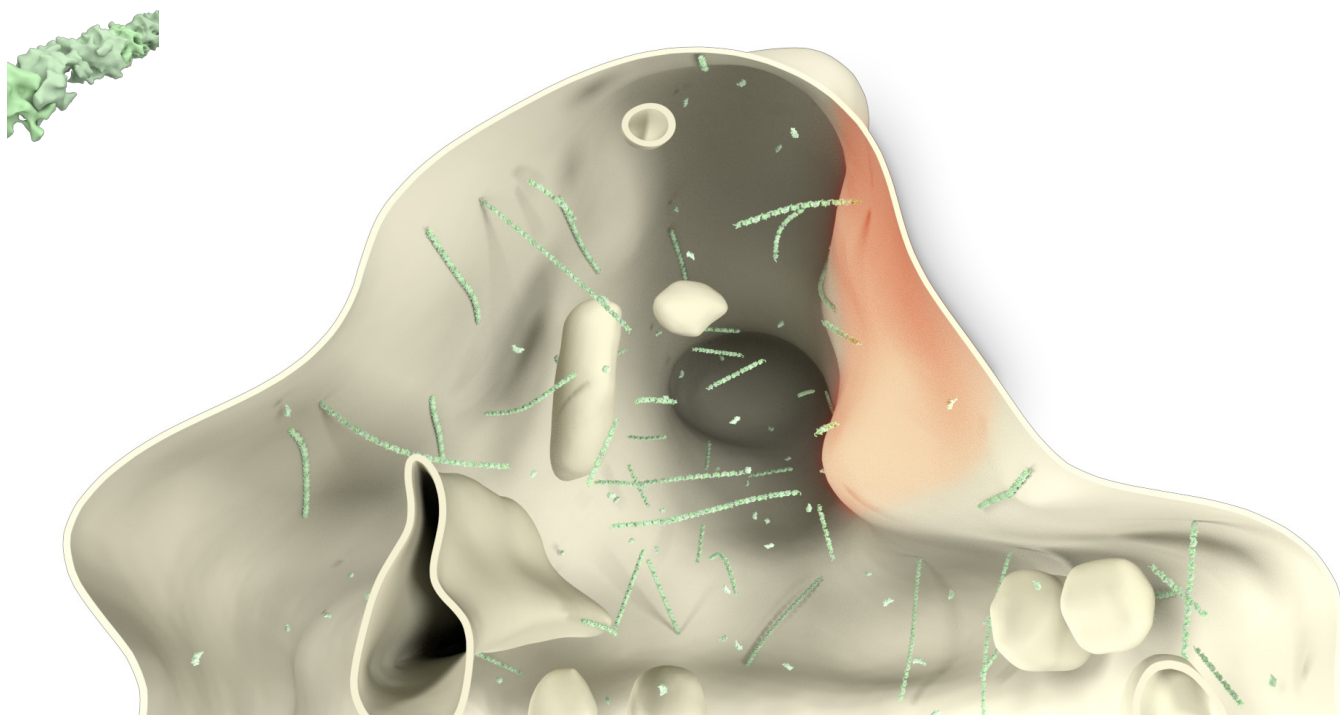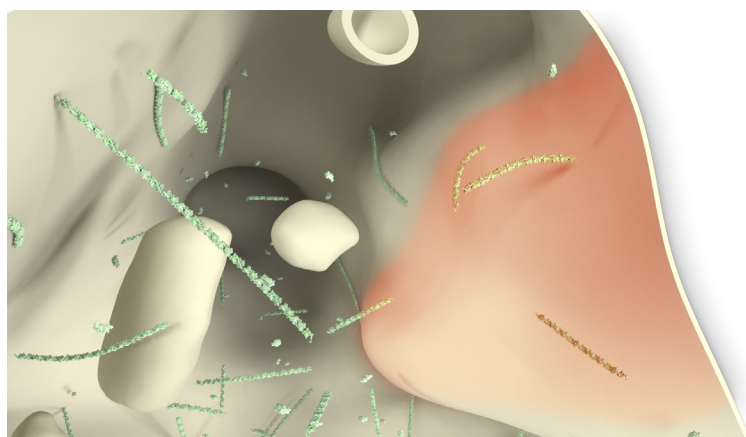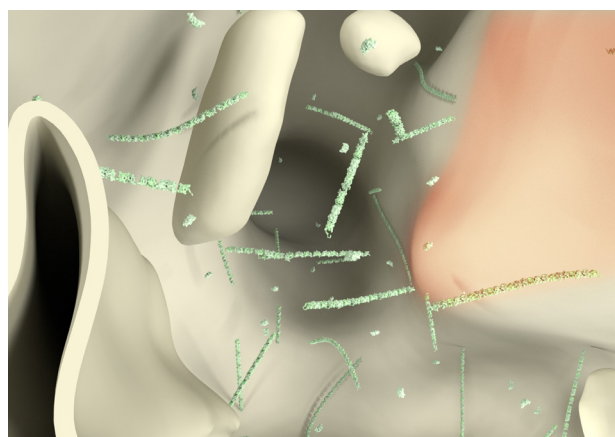

## References

**Antibody:** Atlas Antibodies HPA029524

**PDB Identifier:** 2qag

### Literature:

Brand et al., 2012, Mol. Cell. Biol.

Ewers et al., 2014, PLoS One

Kinoshita et al., 2002, Dev. Cell

Yadav et al., 2017, Neuron



## Shank1 (Synamon, Gene Shank1, Uniprot ID: Q9WV48)

**Known function:** Links the PSD to the cytoskeleton

**Known organization:** Cytosolic, Selfmultimerizes, Forms mesh like structure with Homer proteins, Axially more distal to PSD than PSD95, Forms clusters

**Known Interactions:** Homer proteins, DLGAP1, GluR1

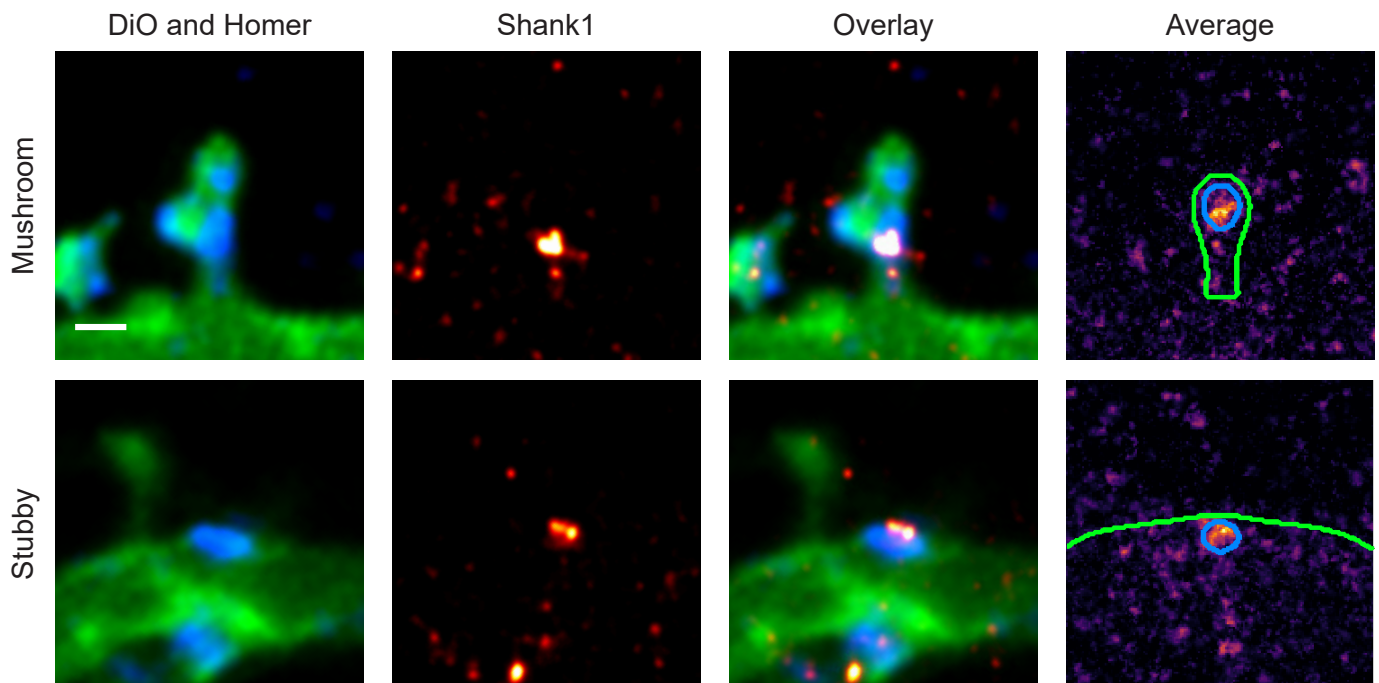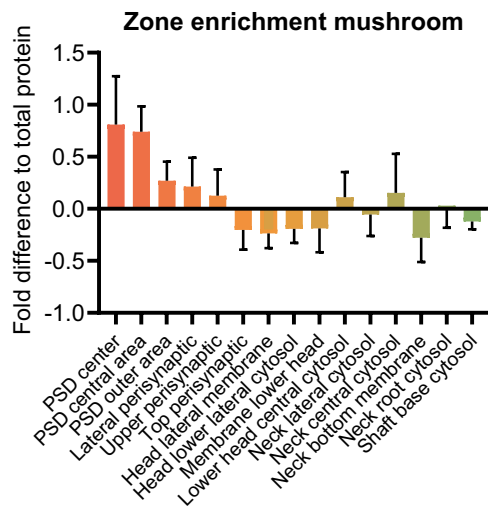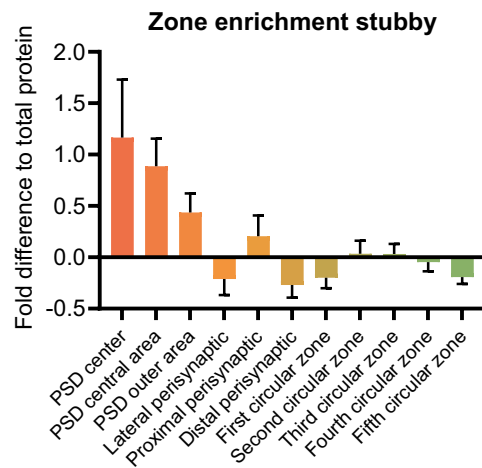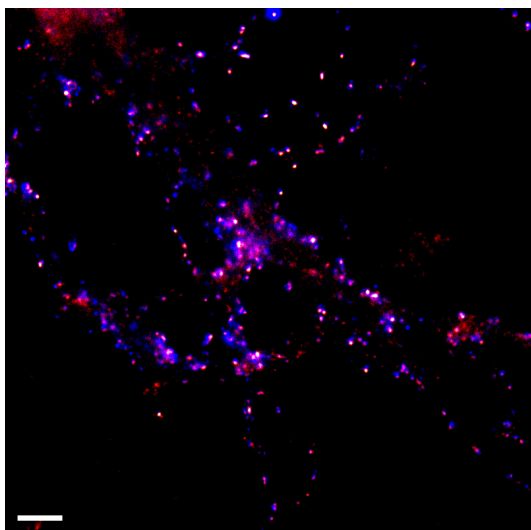

|                        |                                    |              |
|------------------------|------------------------------------|--------------|
| Whole cell copy number | 923695.9 ± 190227.6 (extrapolated) |              |
| Spine copy number      | 178.8 ± 27.1                       |              |
| Function               | PSD Scaffold                       |              |
|                        | Mushroom                           | Stubby       |
| Spine copy number      | 149.3 ± 22.6                       | 214.5 ± 32.5 |
| % of total protein     | 0.2 ± 0.0%                         | 0.2 ± 0.0%   |
| Molarity (μM)          | 1.9 ± 0.3                          | 2.0 ± 0.3    |
| PSD copy number        | 49 ± 7.4                           | 80 ± 12.1    |
| % in PSD               | 32.8 ± 5.0%                        | 37.3 ± 5.7%  |

|          | Spine copy number | % of total protein | Molarity ( $\mu\text{M}$ ) | PSD copy number |
|----------|-------------------|--------------------|----------------------------|-----------------|
| Mushroom | $149.3 \pm 22.6$  | $0.2 \pm 0.0\%$    | $1.9 \pm 0.3$              | $49 \pm 7.4$    |
| Stubby   | $214.5 \pm 32.5$  | $0.2 \pm 0.0\%$    | $2.0 \pm 0.3$              | $80 \pm 12.1$   |

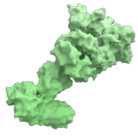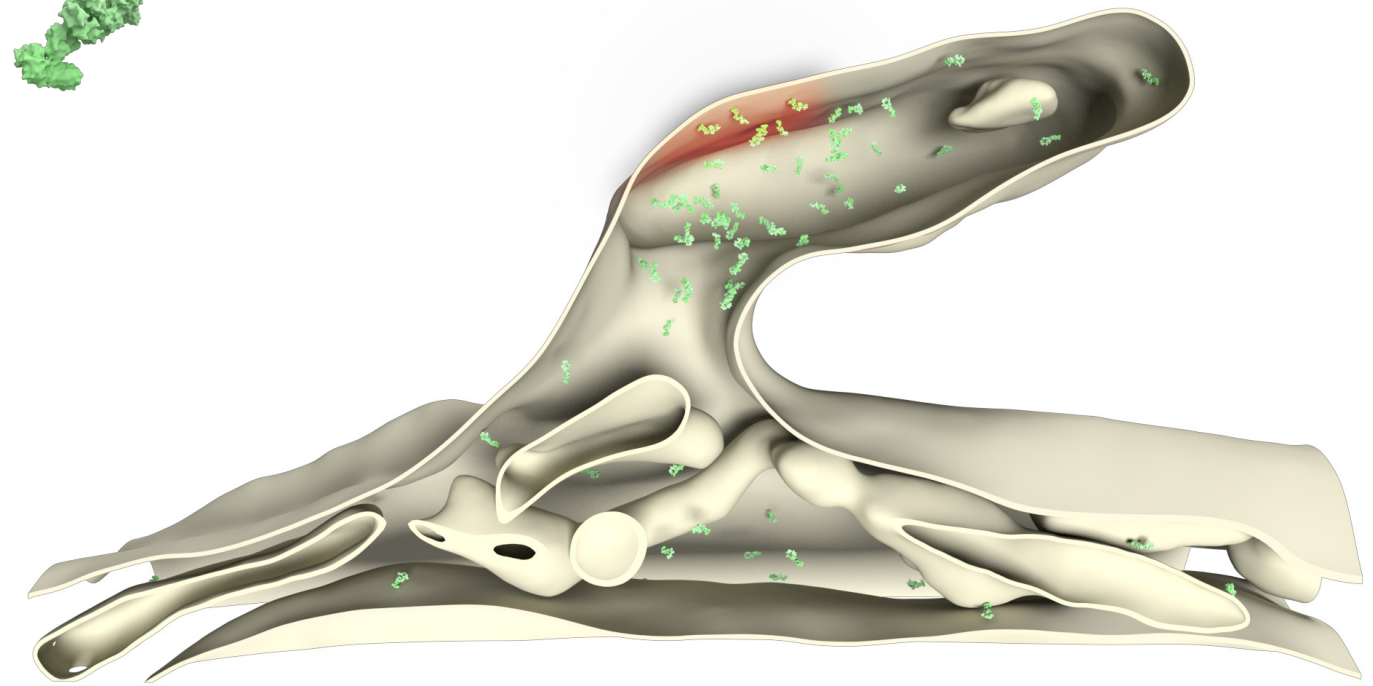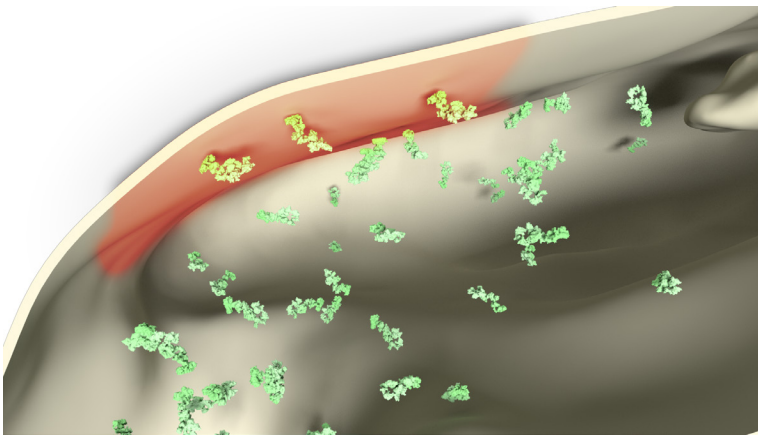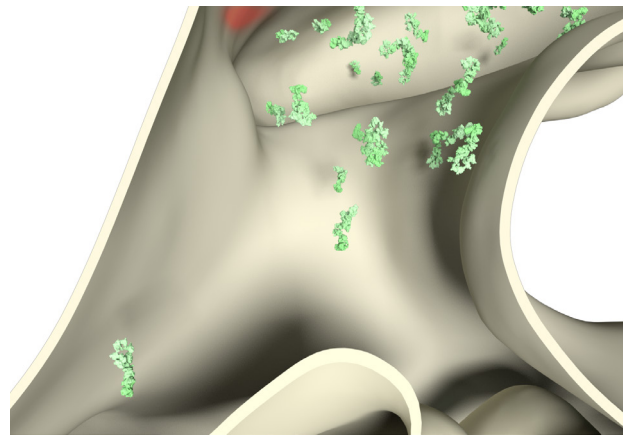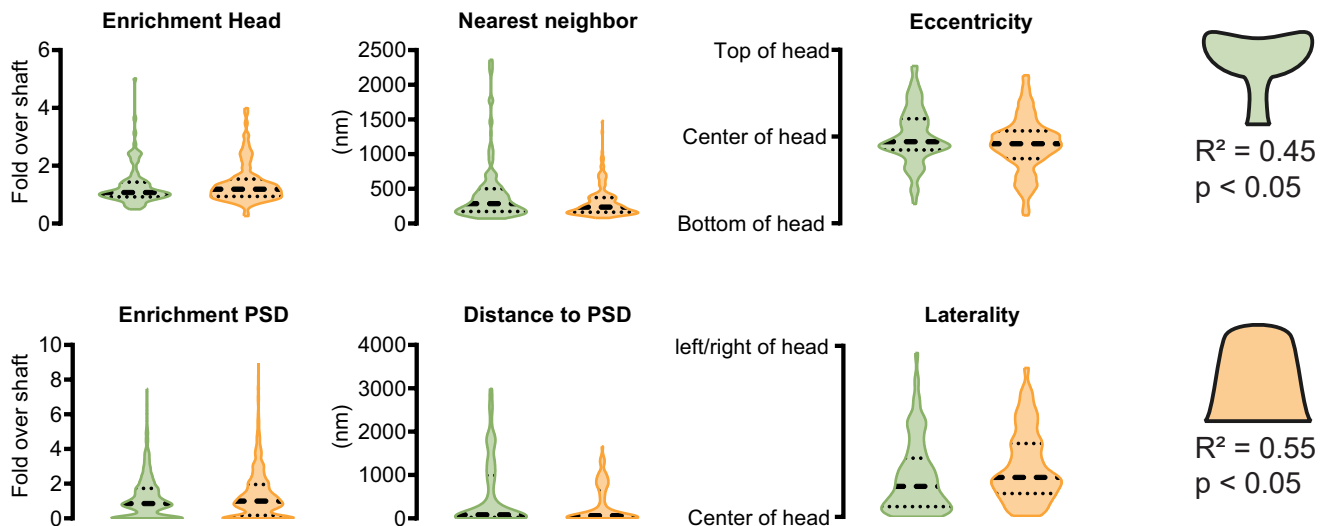

|          | Spine copy number | % of total protein | Molarity ( $\mu\text{M}$ ) | PSD copy number |
|----------|-------------------|--------------------|----------------------------|-----------------|
| Mushroom | $149.3 \pm 22.6$  | $0.2 \pm 0.0\%$    | $1.9 \pm 0.3$              | $49 \pm 7.4$    |
| Stubby   | $214.5 \pm 32.5$  | $0.2 \pm 0.0\%$    | $2.0 \pm 0.3$              | $80 \pm 12.1$   |

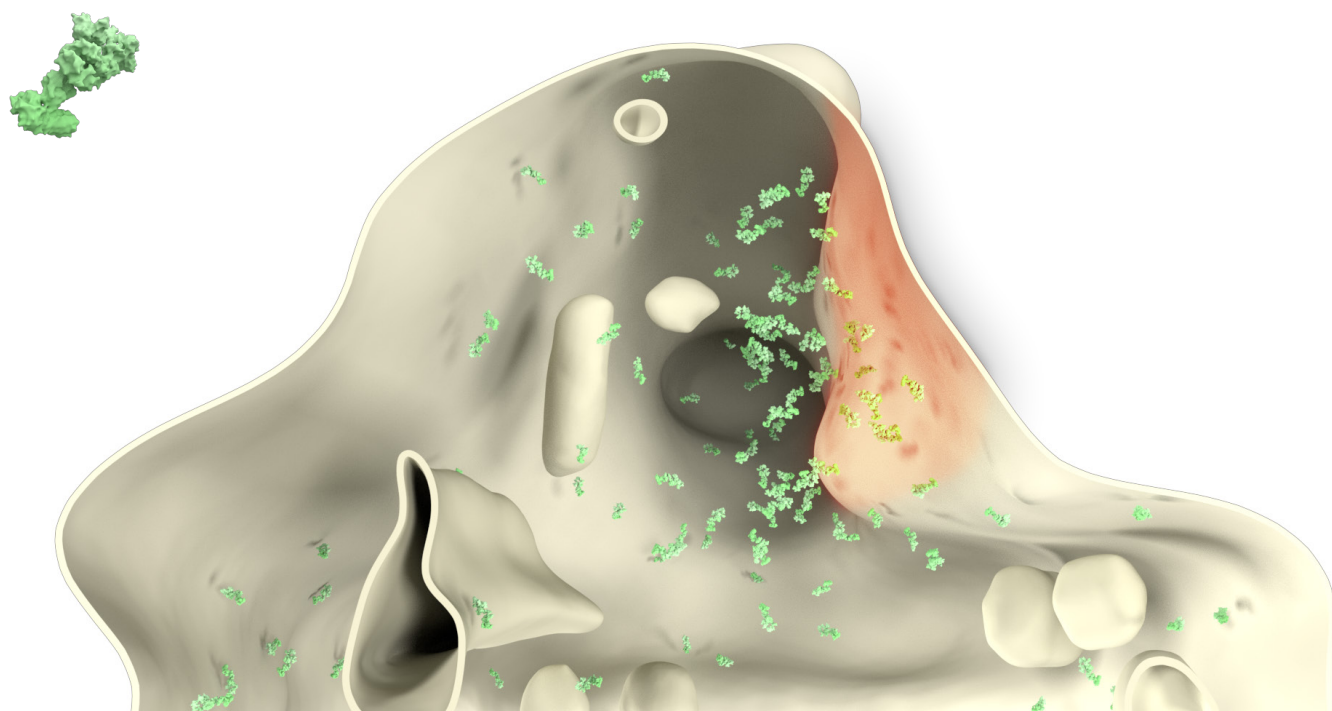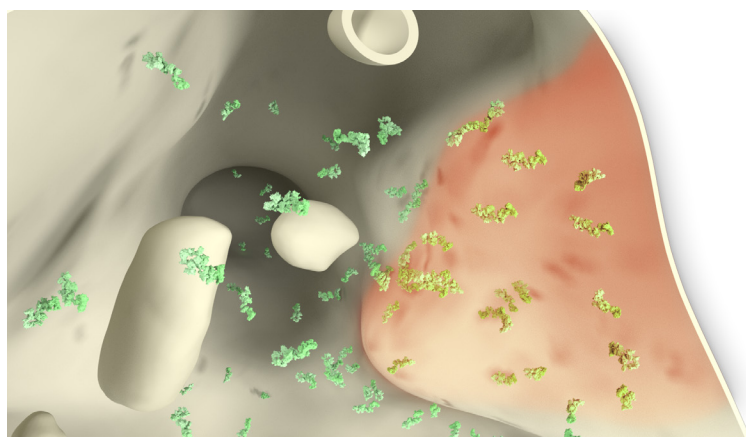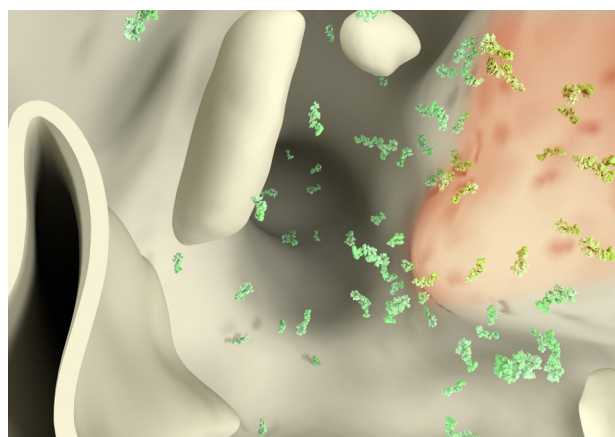

## References

**Antibody:** Synaptic Systems 162 013

**PDB Identifier:** 1q3o, 1wsx, 2f3n

### Literature:

Boeckers et al., 1999b, Biochem. Biophys. Res. Commun.

Dani et al., 2010, Neuron

Hayashi et al., 2006, J. Neurosci.

Hayashi et al., 2009, Cell

MacGillavry et al., 2013, Neuron

Naisbitt et al., 1999, Neuron

Tao-Cheng et al., 2015, PLoS One

Tu et al., 1998, Neuron

Uchino et al., 2006, J. Neurochem.

Valtschanoff and Weinberg, 2001, J. Neurosci.



# Shank2 (ProSAP1, CortBP1, Gene: Shank2, Uniprot ID: Q9QX74)

**Known function:** Links the PSD to the cytoskeleton

**Known organization:** Cytosolic, Selfmultimerizes, Forms mesh like structure with Homer proteins, Axially more distal to PSD than PSD95, Forms clusters

**Known Interactions:** Homer proteins, DLGAP1, Cortactin, GluR1

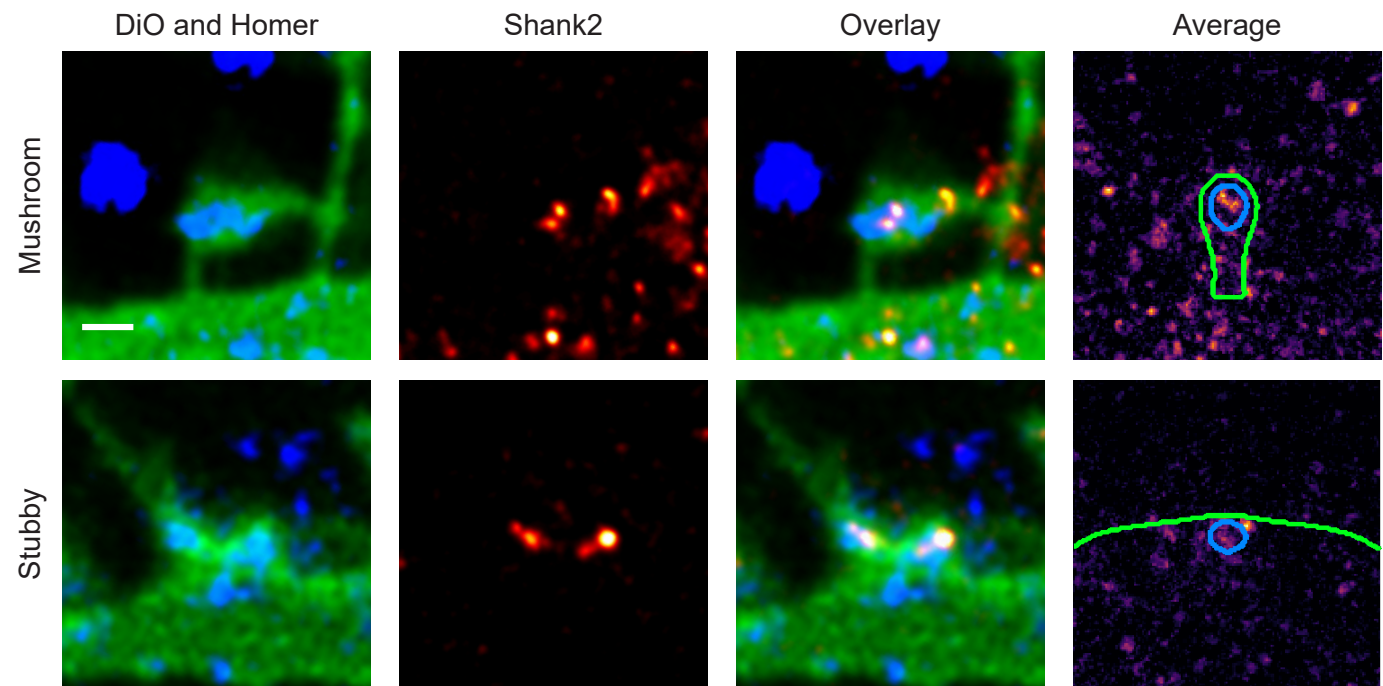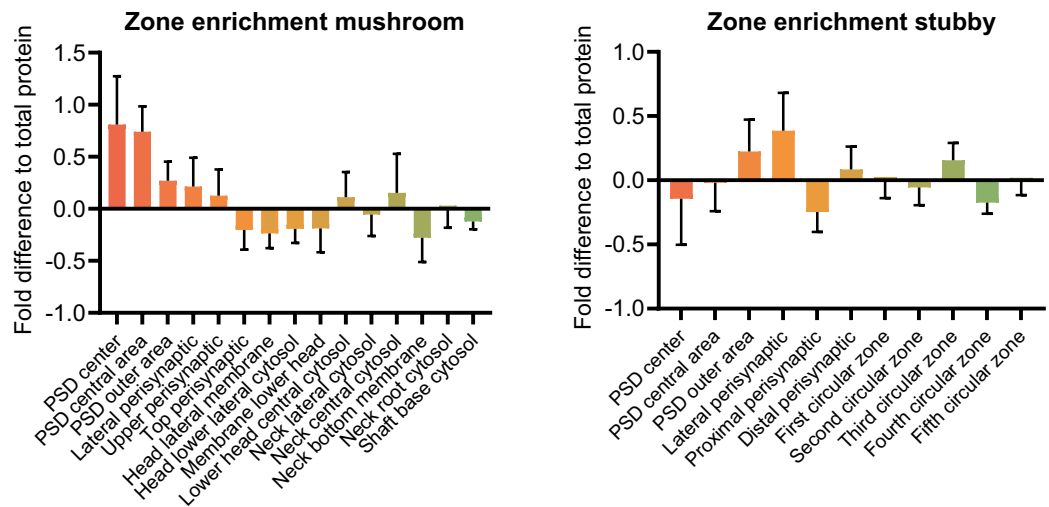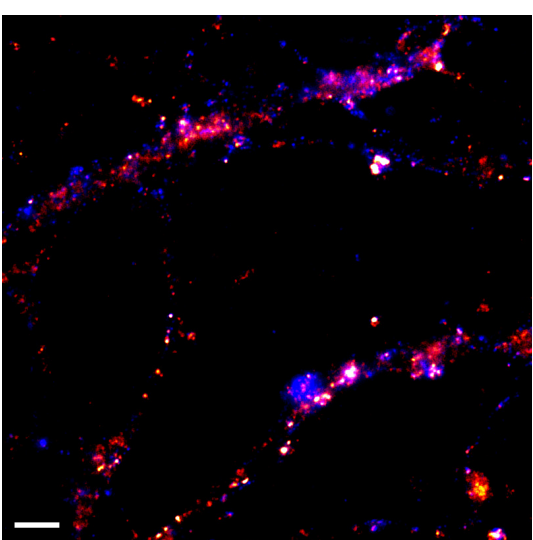

|                        |                                       |              |
|------------------------|---------------------------------------|--------------|
| Whole cell copy number | 10834453.7 ± 7438062.5 (extrapolated) |              |
| Spine copy number      | 238.1 ± 79.9                          |              |
| Function               | PSD Scaffold                          |              |
|                        | Mushroom                              | Stubby       |
| Spine copy number      | 255.0 ± 85.6                          | 231.6 ± 77.7 |
| % of total protein     | 0.2 ± 0.1%                            | 0.2 ± 0.1%   |
| Molarity (µM)          | 3.2 ± 1.1                             | 2.2 ± 0.7    |
| PSD copy number        | 50 ± 16.8                             | 61 ± 20.5    |
| % in PSD               | 19.6 ± 6.6%                           | 26.3 ± 8.8%  |

|          | Spine copy number | % of total protein | Molarity ( $\mu\text{M}$ ) | PSD copy number |
|----------|-------------------|--------------------|----------------------------|-----------------|
| Mushroom | $255.0 \pm 85.6$  | $0.2 \pm 0.1\%$    | $3.2 \pm 1.1$              | $50 \pm 16.8$   |
| Stubby   | $231.6 \pm 77.7$  | $0.2 \pm 0.1\%$    | $2.2 \pm 0.7$              | $61 \pm 20.5$   |

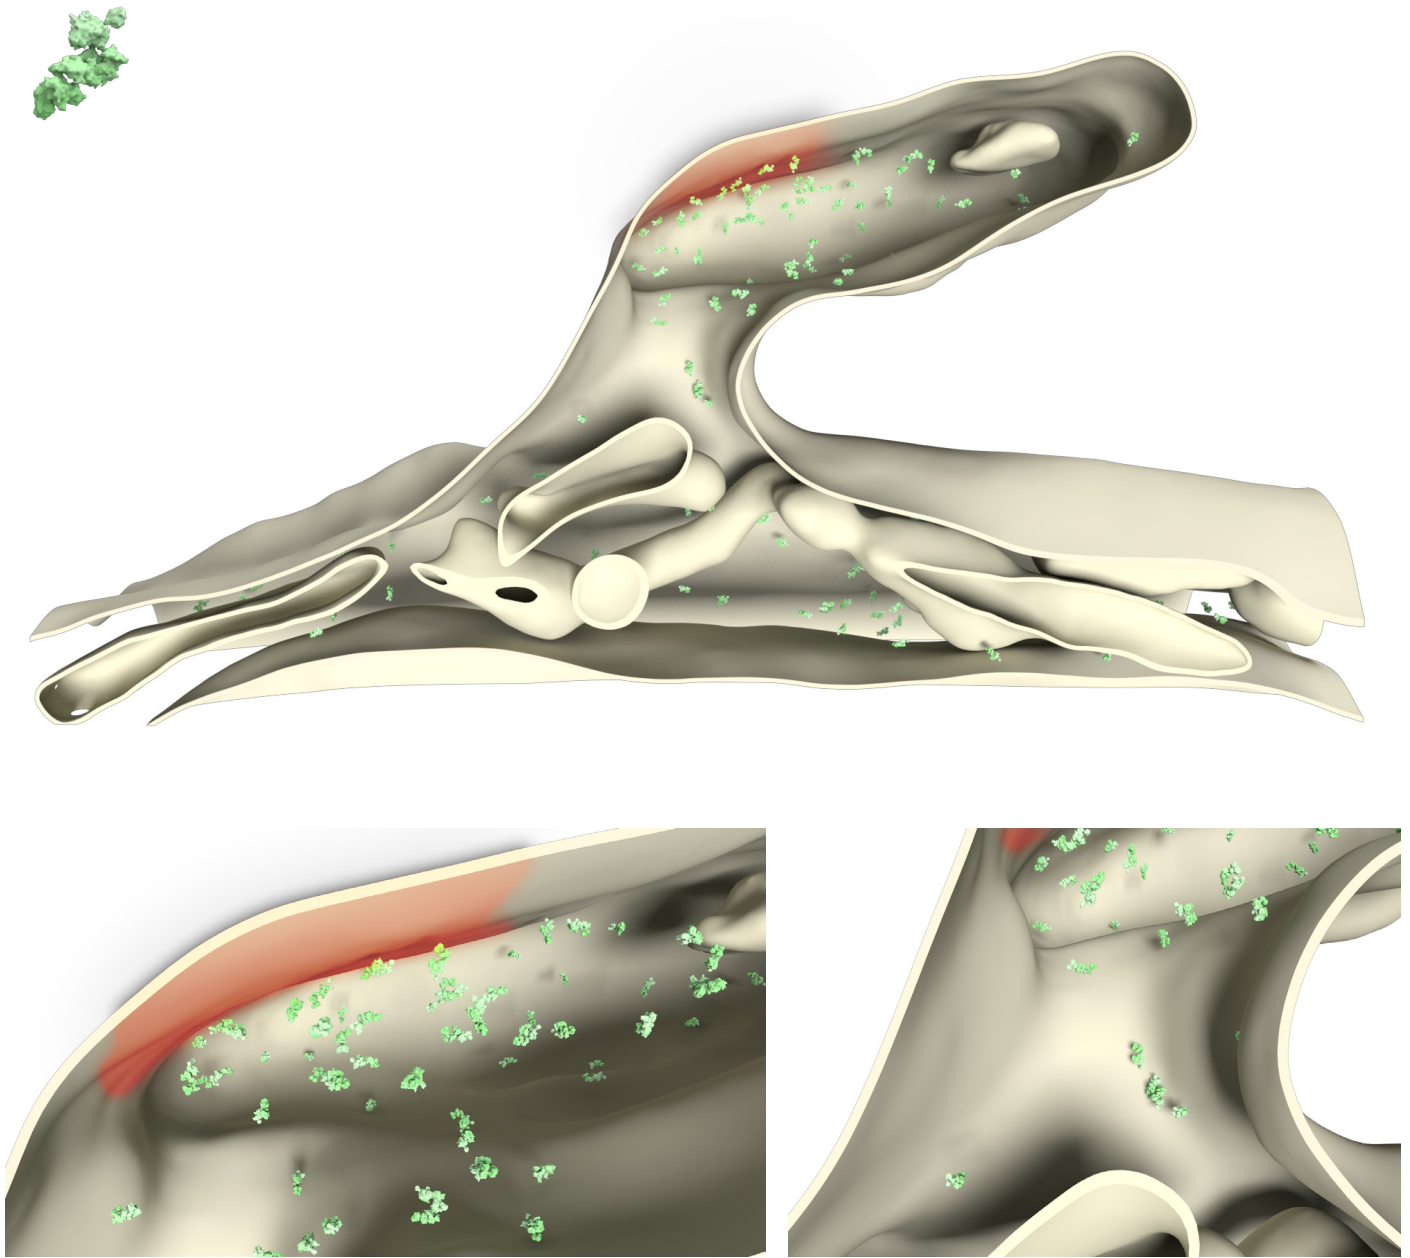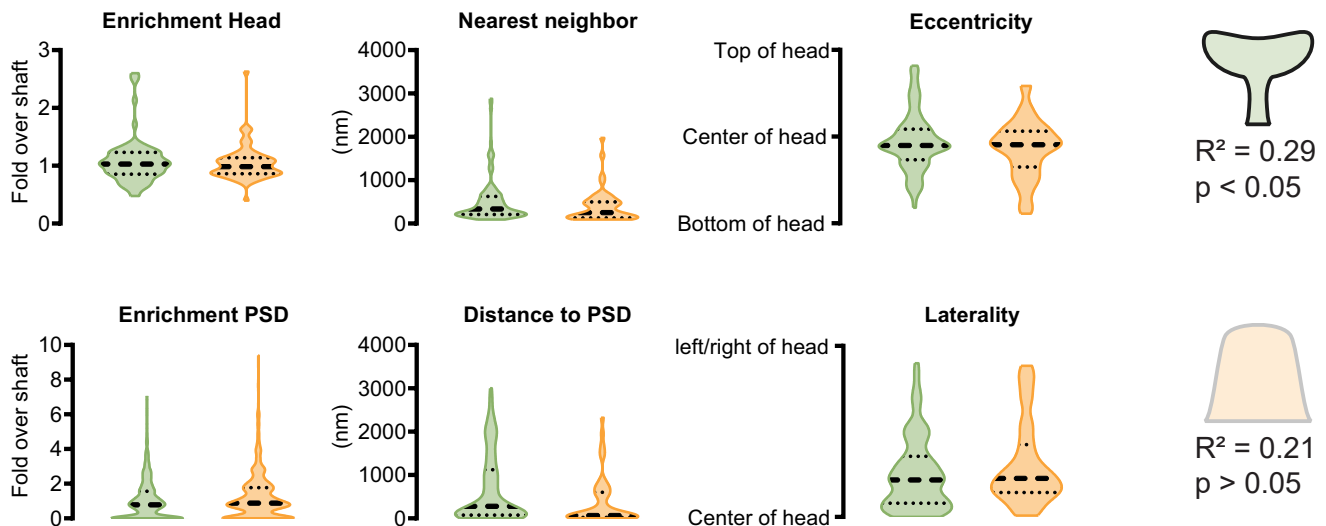

|          | Spine copy number | % of total protein | Molarity ( $\mu\text{M}$ ) | PSD copy number |
|----------|-------------------|--------------------|----------------------------|-----------------|
| Mushroom | $255.0 \pm 85.6$  | $0.2 \pm 0.1\%$    | $3.2 \pm 1.1$              | $50 \pm 16.8$   |
| Stubby   | $231.6 \pm 77.7$  | $0.2 \pm 0.1\%$    | $2.2 \pm 0.7$              | $61 \pm 20.5$   |

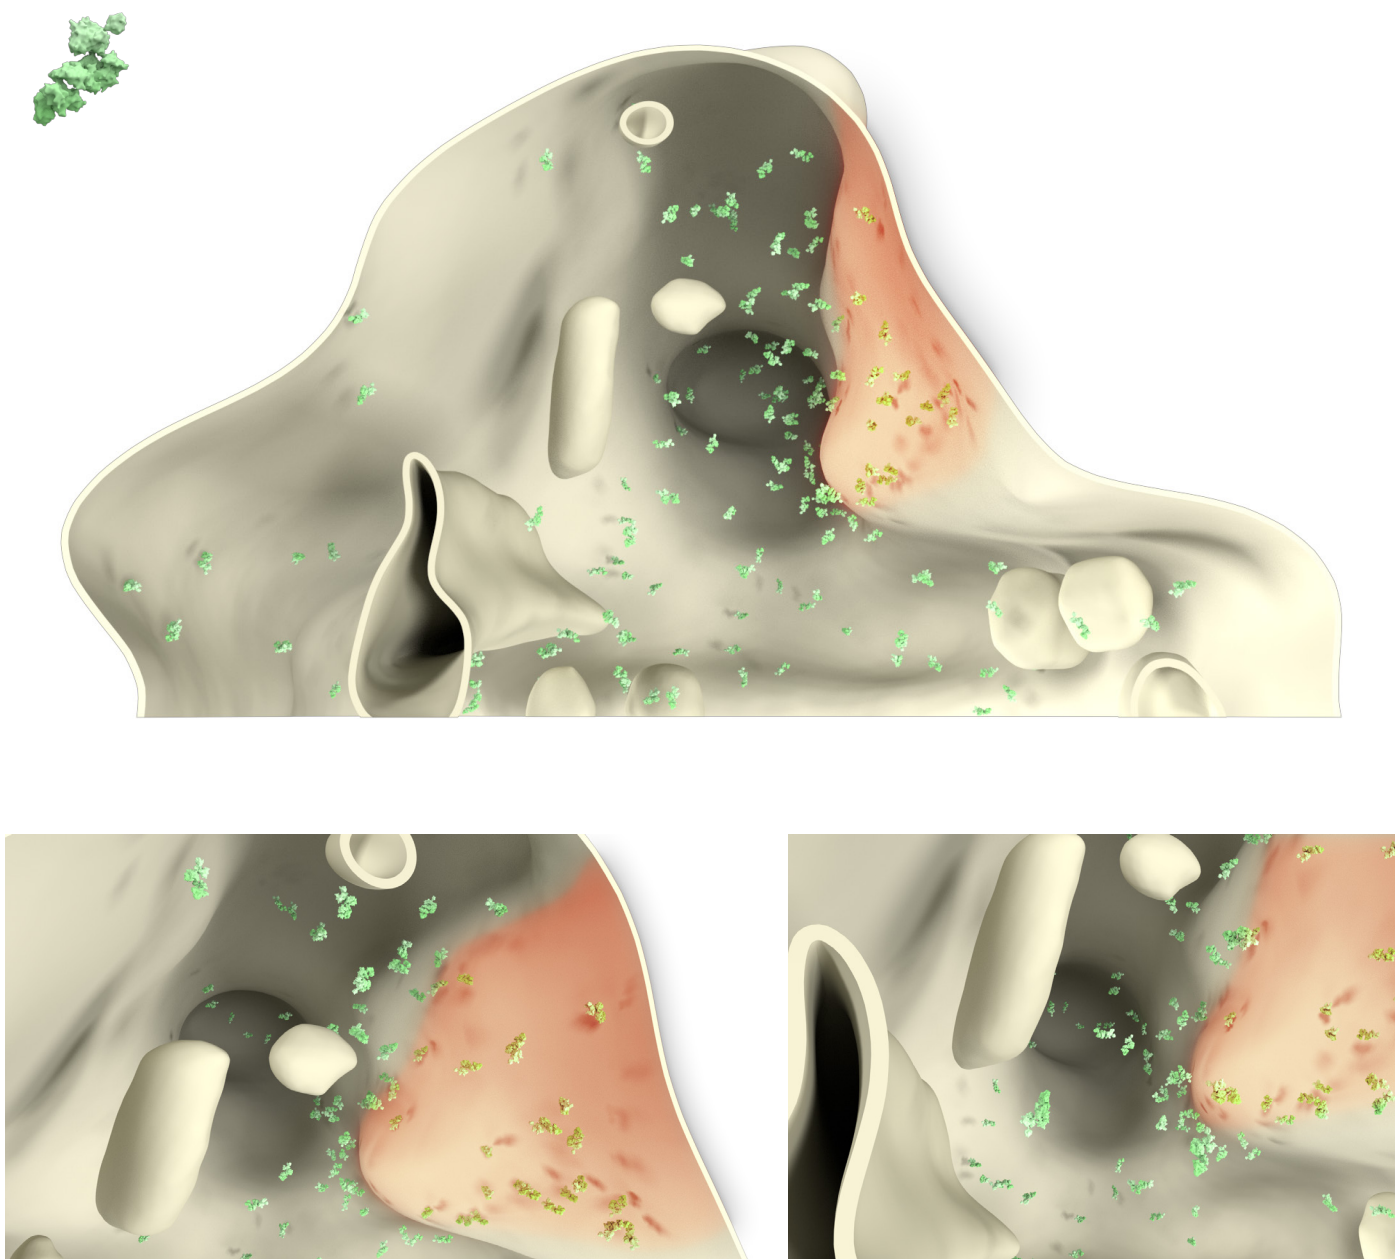

## References

**Antibody:** Synaptic Systems 162 202

**PDB Identifier:** modified Shank1

### Literature:

Boeckers et al., 1999b, Biochem. Biophys. Res. Commun.

Dani et al., 2010, Neuron

Du et al., 1998, Mol. Cell. Biol.

Hayashi et al., 2006, J. Neurosci.

Hayashi et al., 2009, Cell

MacGillavry et al., 2013, Neuron

Naisbitt et al., 1999, Neuron

Tao-Cheng et al., 2015, PLoS One

Tu et al., 1998, Neuron

Uchino et al., 2006, J. Neurochem.

Valtschanoff and Weinberg, 2001, J. Neurosci.



## Shank3 (ProSAP2 Gene: Shank2, Uniprot ID: Q9JLU4)

Known function: Links the PSD to the cytoskeleton

Known organization: Cytosolic, Selfmultimerizes, Forms mesh like structure with Homer proteins, Axially more distal to PSD than PSD95, Forms clusters

Known Interactions: Homer proteins, DLGAP1, Cortactin, GluR1

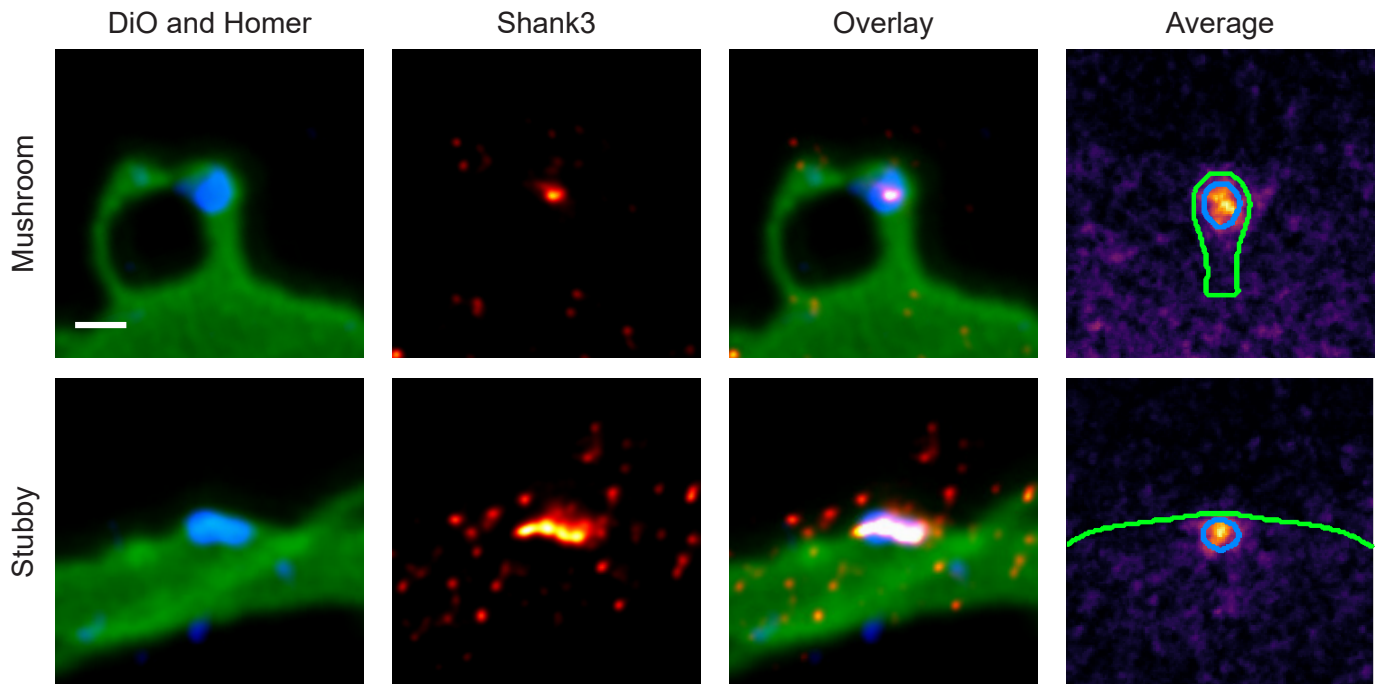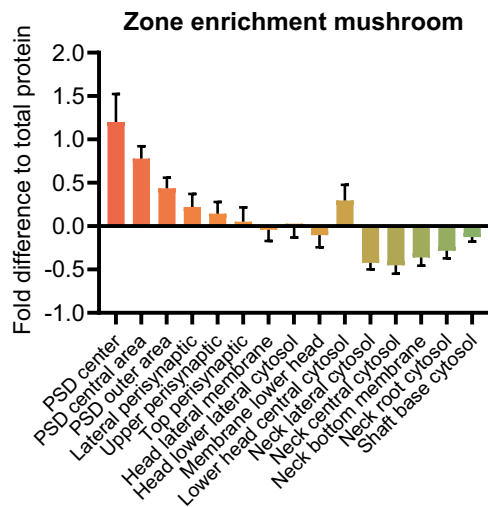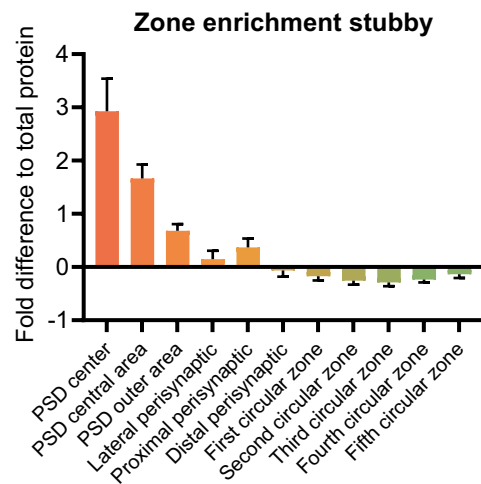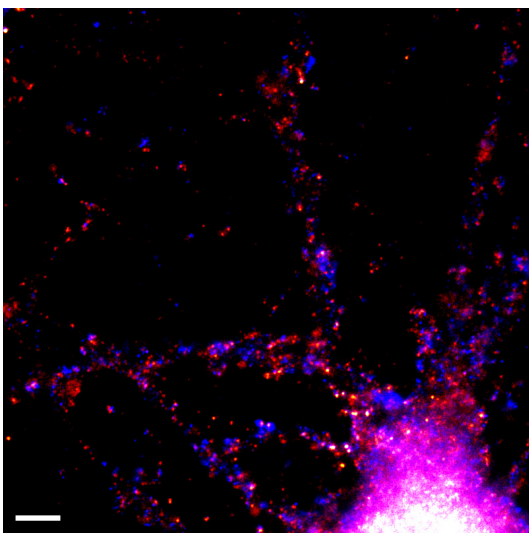

|                        |                                   |              |
|------------------------|-----------------------------------|--------------|
| Whole cell copy number | 283141.9 ± 49736.9 (extrapolated) |              |
| Spine copy number      | 124.4 ± 20.1                      |              |
| Function               | PSD Scaffold                      |              |
|                        | Mushroom                          | Stubby       |
| Spine copy number      | 95.8 ± 15.5                       | 173.8 ± 28.1 |
| % of total protein     | 0.1 ± 0.0%                        | 0.1 ± 0.0%   |
| Molarity (μM)          | 1.2 ± 0.2                         | 1.6 ± 0.3    |
| PSD copy number        | 51 ± 8.2                          | 105 ± 17.0   |
| % in PSD               | 53.2 ± 8.6%                       | 60.4 ± 9.8%  |

|          | Spine copy number | % of total protein | Molarity ( $\mu\text{M}$ ) | PSD copy number |
|----------|-------------------|--------------------|----------------------------|-----------------|
| Mushroom | $95.8 \pm 15.5$   | $0.1 \pm 0.0\%$    | $1.2 \pm 0.2$              | $51 \pm 8.2$    |
| Stubby   | $173.8 \pm 28.1$  | $0.1 \pm 0.0\%$    | $1.6 \pm 0.3$              | $105 \pm 17.0$  |

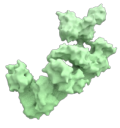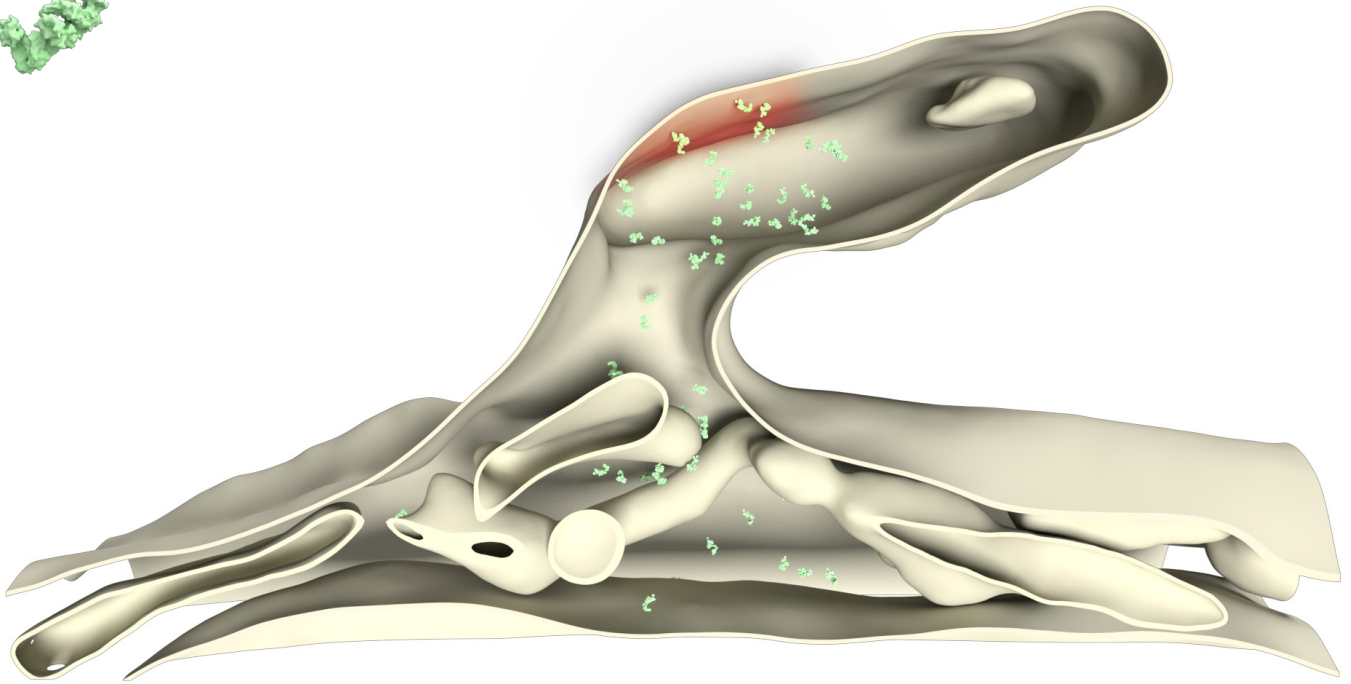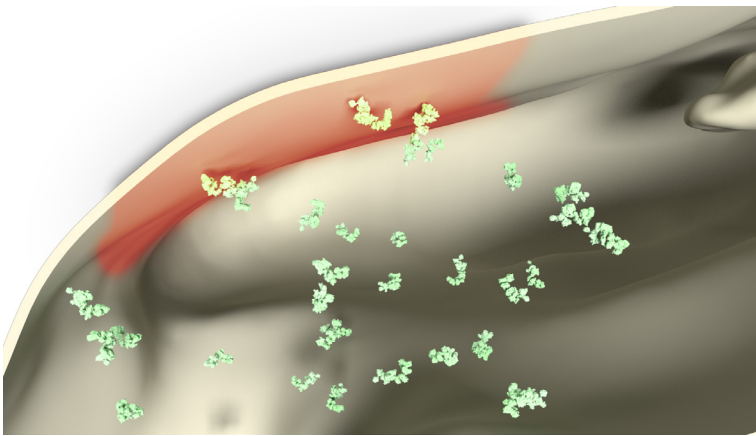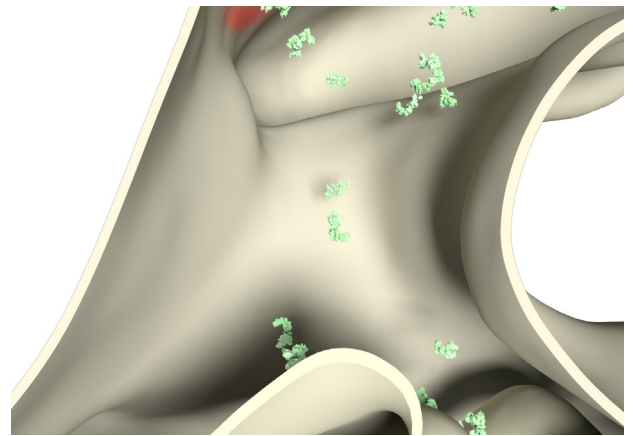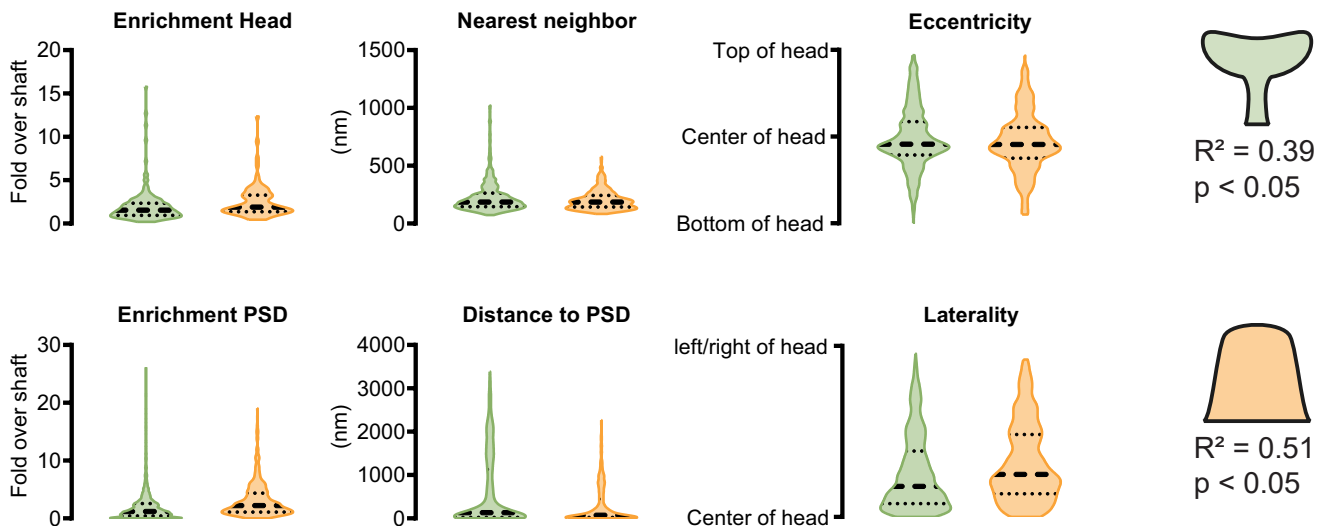

|          | Spine copy number | % of total protein | Molarity ( $\mu\text{M}$ ) | PSD copy number |
|----------|-------------------|--------------------|----------------------------|-----------------|
| Mushroom | $95.8 \pm 15.5$   | $0.1 \pm 0.0\%$    | $1.2 \pm 0.2$              | $51 \pm 8.2$    |
| Stubby   | $173.8 \pm 28.1$  | $0.1 \pm 0.0\%$    | $1.6 \pm 0.3$              | $105 \pm 17.0$  |

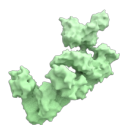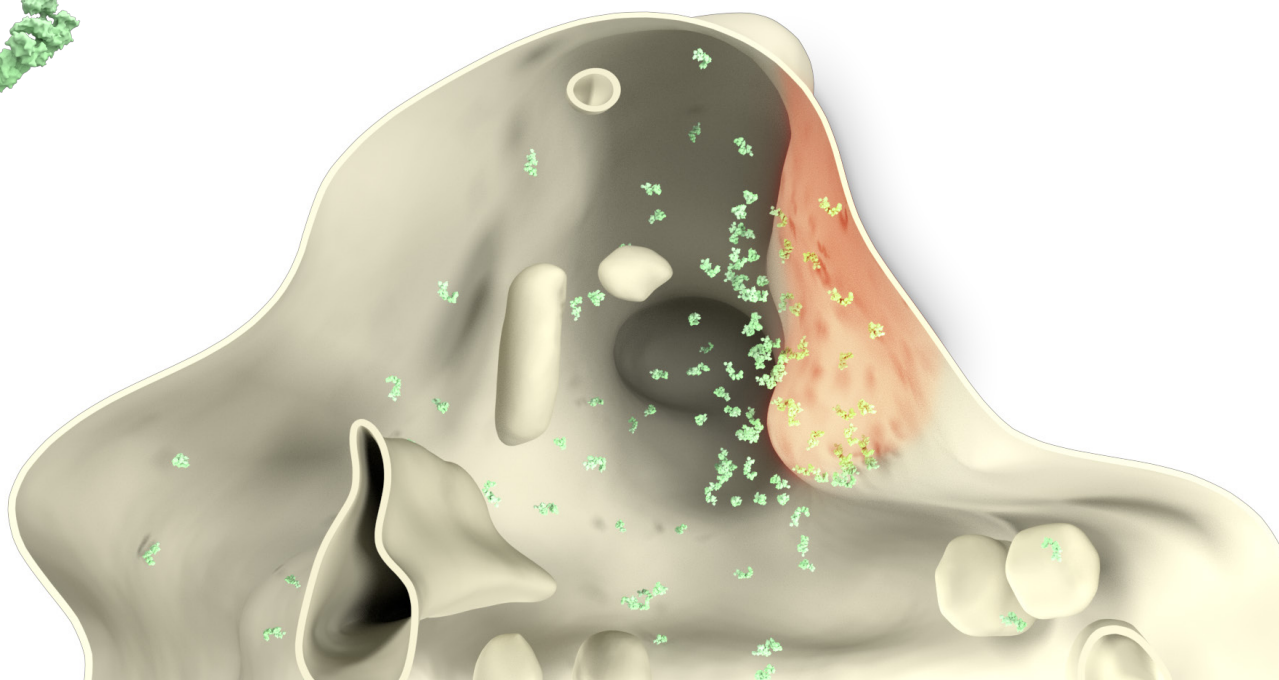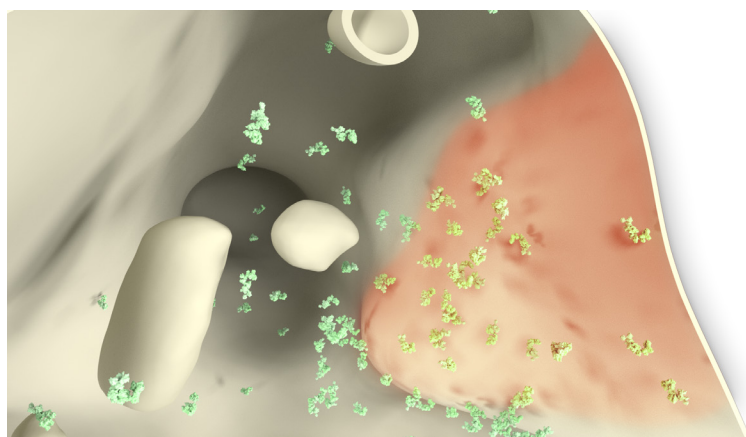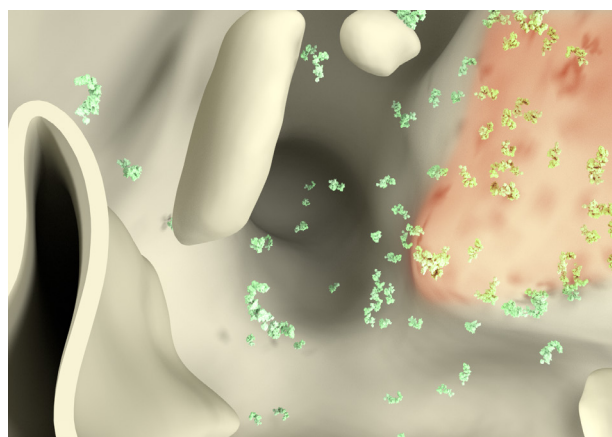

## References

**Antibody:** Synaptic Systems 162 302

**PDB Identifier:** 5q4x

### Literature:

Boeckers et al., 1999b, Biochem. Biophys. Res. Commun.

Dani et al., 2010, Neuron

Du et al., 1998, Mol. Cell. Biol.

Hayashi et al., 2006, J. Neurosci.

Hayashi et al., 2009, Cell

MacGillavry et al., 2013, Neuron

Naisbitt et al., 1999, Neuron

Tao-Cheng et al., 2015, PLoS One

Tu et al., 1998, Neuron

Uchino et al., 2006, J. Neurochem.

Valtschanoff and Weinberg, 2001, J. Neurosci.



## SNAP23 (Gene: Snap23, Uniprot ID: O70377)

**Known function:** Qbc SNARE, Lysosome and granule secretion, Asynchronous SV release, Delivery of NMDAR to PM

**Known organization:** Membrane associated, On PM, Enriched in spines, Perisynaptic

**Known Interactions:** Syntaxin2, Syntaxin4, VAMP2, VAMP7, Synaptotagmin 7

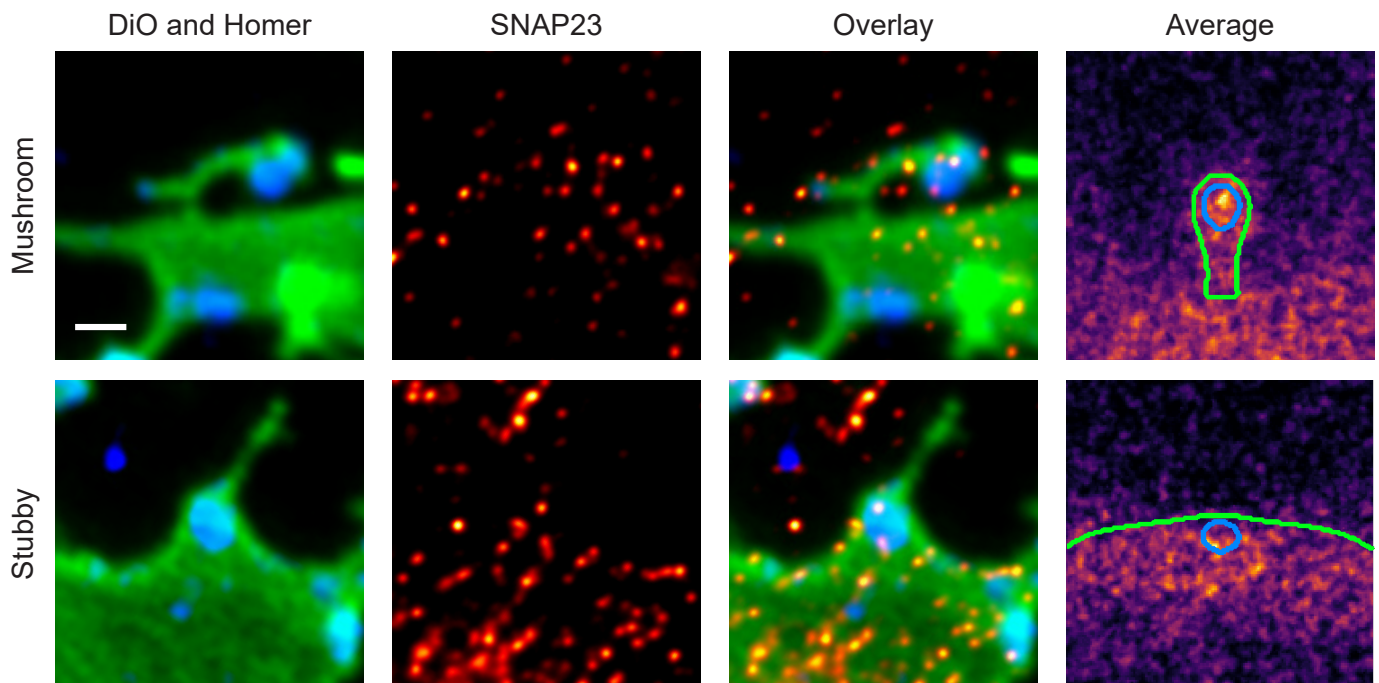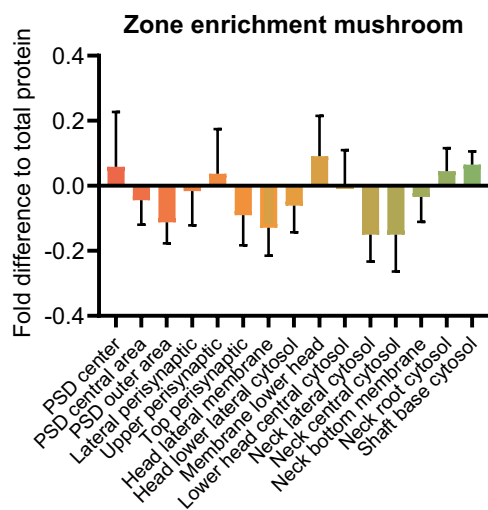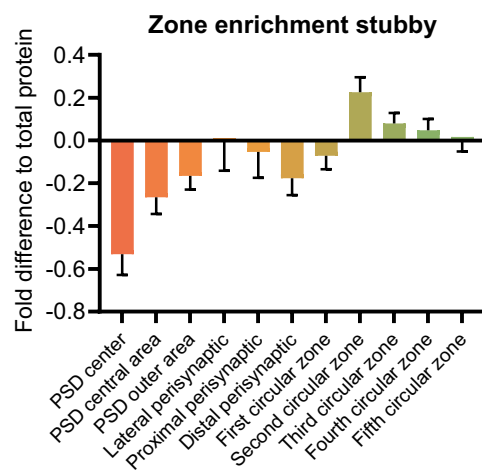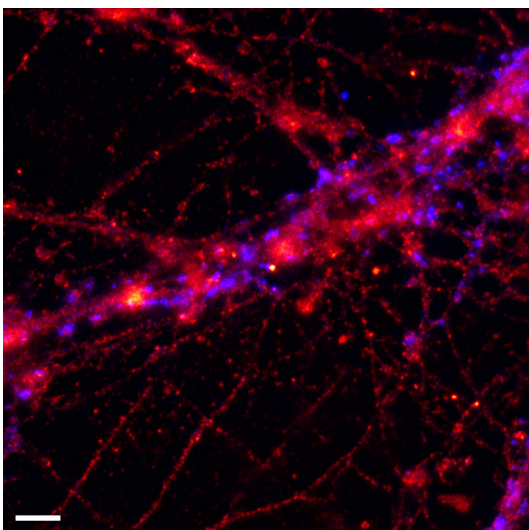

|                        |                                           |            |
|------------------------|-------------------------------------------|------------|
| Whole cell copy number | 22632.7<br>(detected in only 1 replicate) |            |
| Spine copy number      | 6 ± 0.9                                   |            |
| Function               | SNAREs and assoc. proteins                |            |
|                        | Mushroom                                  | Stubby     |
| Spine copy number      | 4.9 ± 0.7                                 | 7.7 ± 1.2  |
| % of total protein     | 0.0 ± 0.0%                                | 0.0 ± 0.0% |
| Molarity (μM)          | 0.1 ± 0.0                                 | 0.1 ± 0.0  |
| PSD copy number        | 1 ± 0.0                                   | 0 ± 0.0    |
| % in PSD               | 20.5 ± 0.0%                               | 0 ± 0.0%   |

|          | Spine copy number | % of total protein | Molarity ( $\mu\text{M}$ ) | PSD copy number  |
|----------|-------------------|--------------------|----------------------------|------------------|
| Mushroom | $4.9 \pm 0.7$     | $0.0 \pm 0.0\%$    | $0.1 \pm 0.0$              | $20.5 \pm 0.0\%$ |
| Stubby   | $7.7 \pm 1.2$     | $0.0 \pm 0.0\%$    | $0.1 \pm 0.0$              | $0 \pm 0.0\%$    |

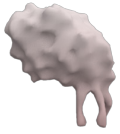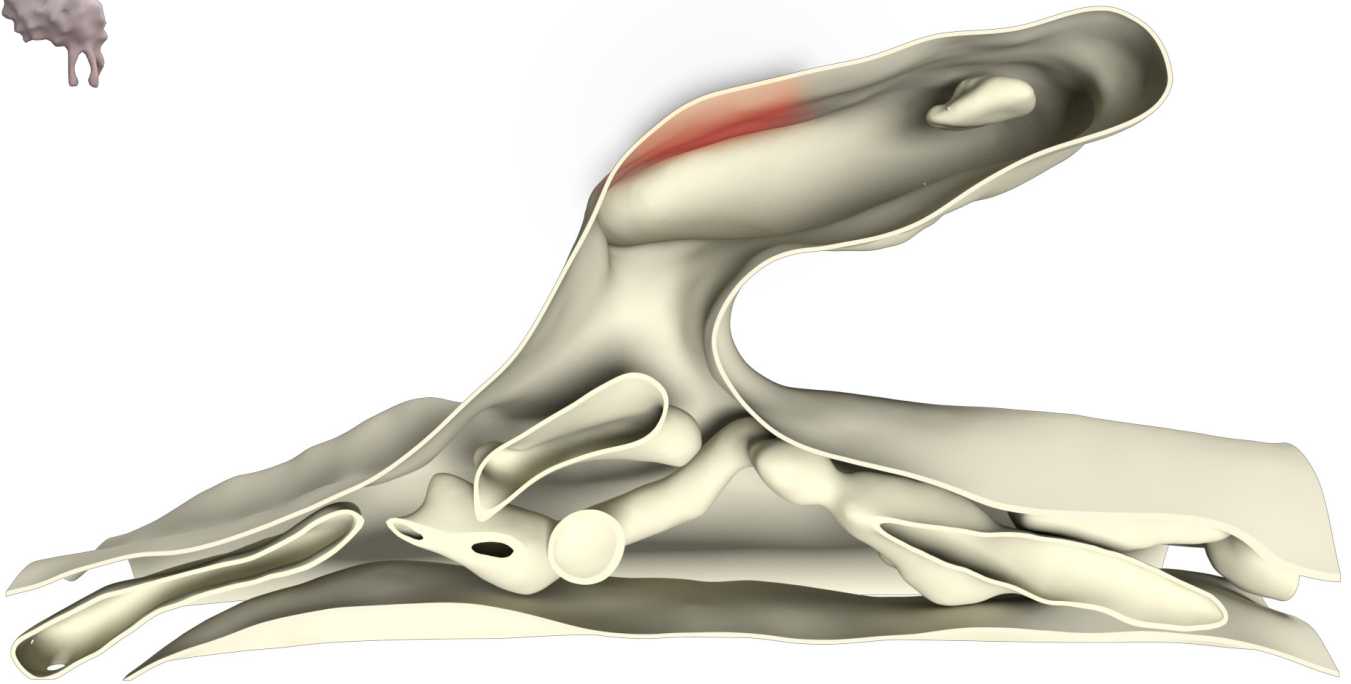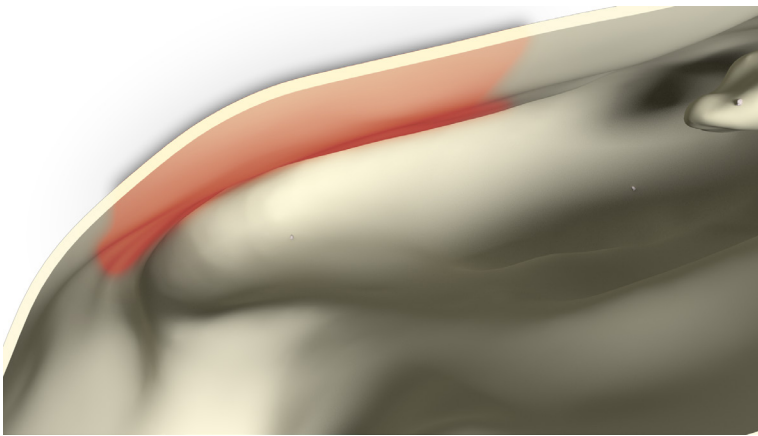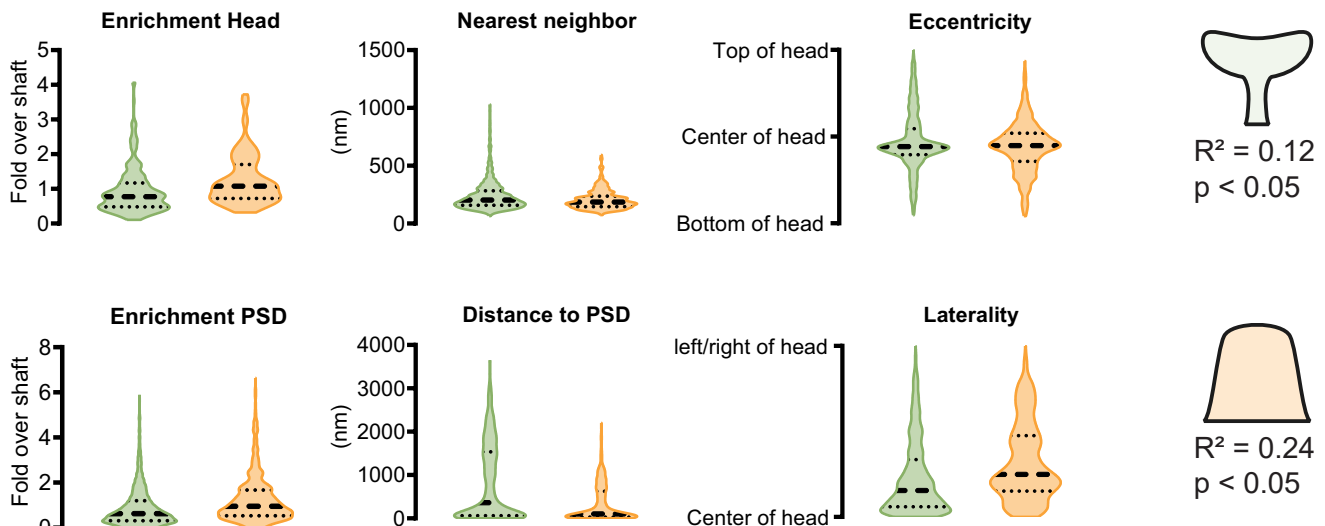

|          | Spine copy number | % of total protein | Molarity ( $\mu\text{M}$ ) | PSD copy number  |
|----------|-------------------|--------------------|----------------------------|------------------|
| Mushroom | $4.9 \pm 0.7$     | $0.0 \pm 0.0\%$    | $0.1 \pm 0.0$              | $20.5 \pm 0.0\%$ |
| Stubby   | $7.7 \pm 1.2$     | $0.0 \pm 0.0\%$    | $0.1 \pm 0.0$              | $0 \pm 0.0\%$    |

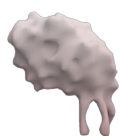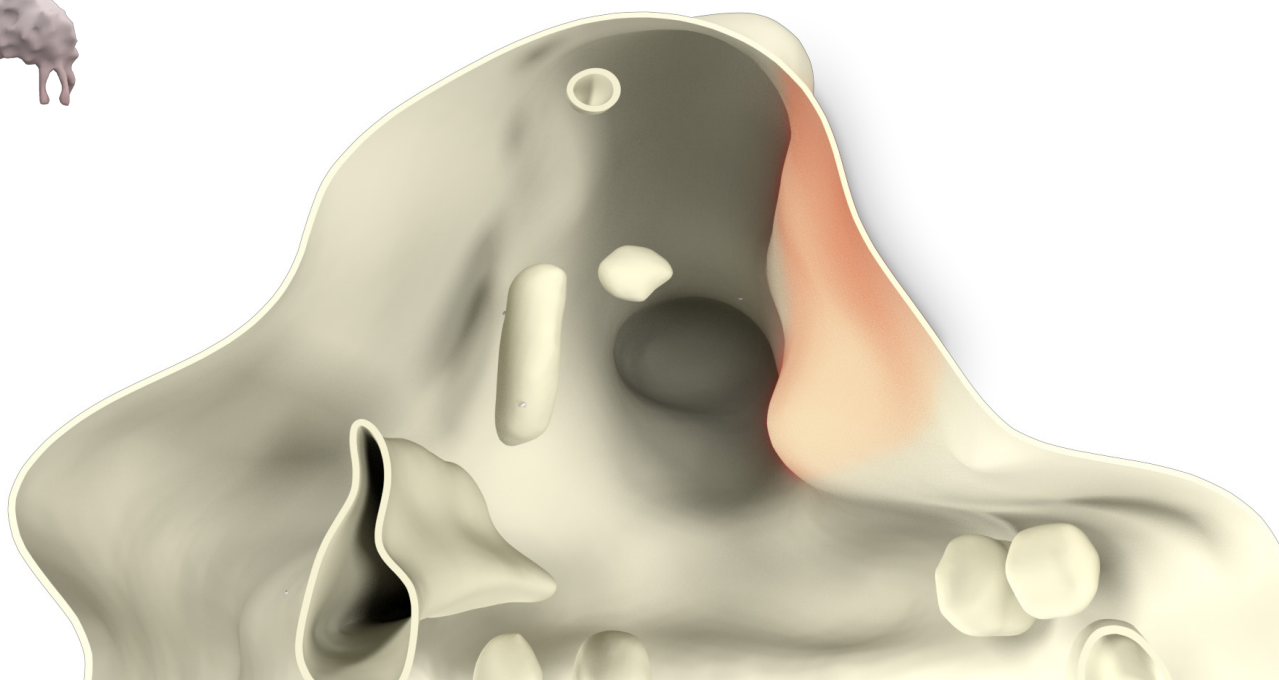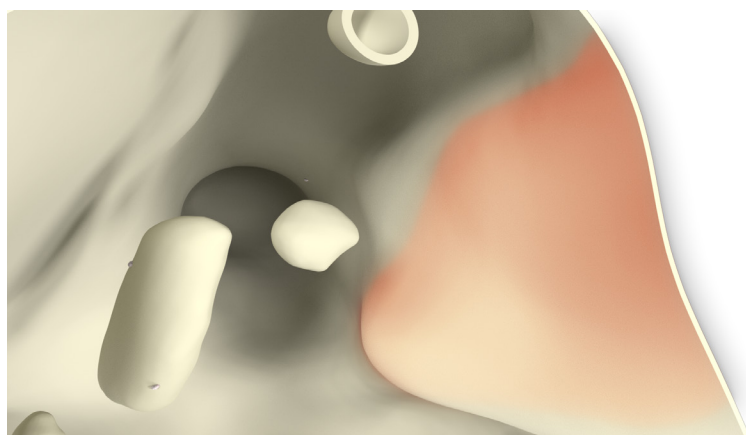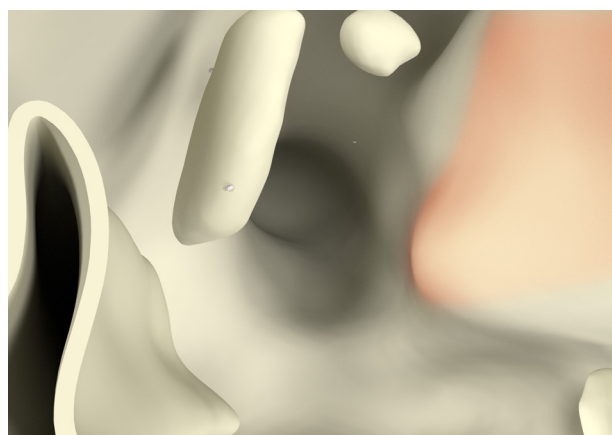

## References

**Antibody:** Synaptic Systems 111 202

**PDB Identifier:** modified SNAP25

### Literature:

Flaumenhaft et al., 1999, J. Biol. Chem.

Rao et al., 2004, J. Biol. Chem.

Suh et al., 2010, Na. Neurosci.

Weber et al., 2014, PLoS One



## SNAP25 (Gene: Snap25 , Uniprot ID: P60881)

**Known function:** Qbc SNARE, SV release, regulates PSD95 mobility, Delivery of AMPAR and NMDAR to PM

**Known organization:** Membrane-associated, On PM, Slightly on endosomes and TGN

**Known Interactions:** Syntaxin1, Syntaxin 4, Syntaxin 13, VAMP1, VAMP2, GRIP1

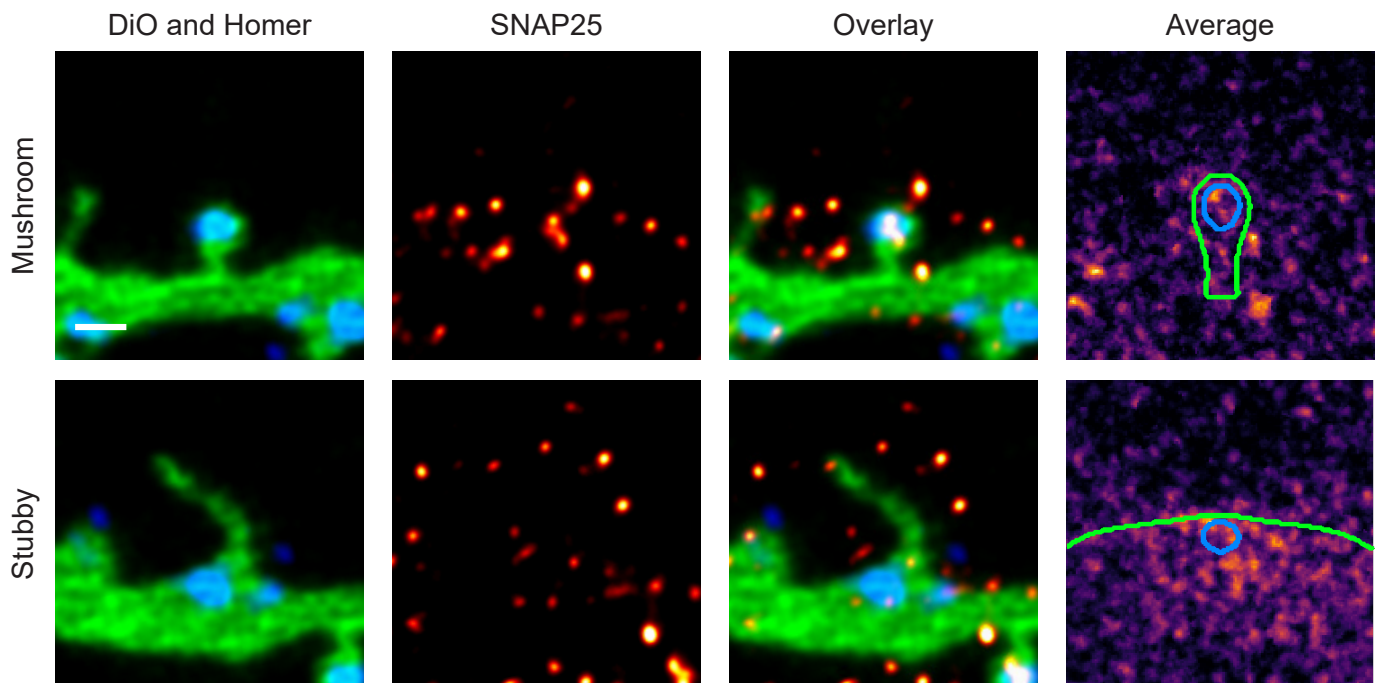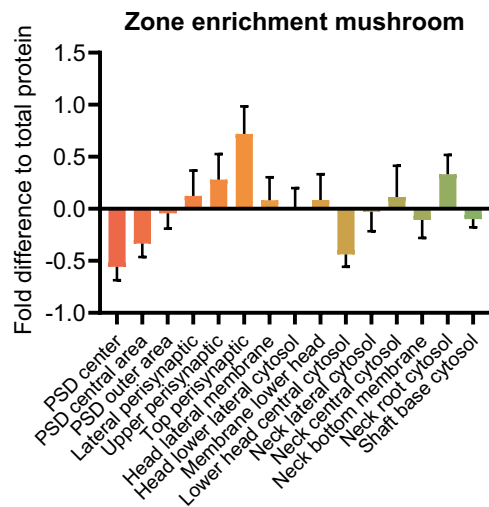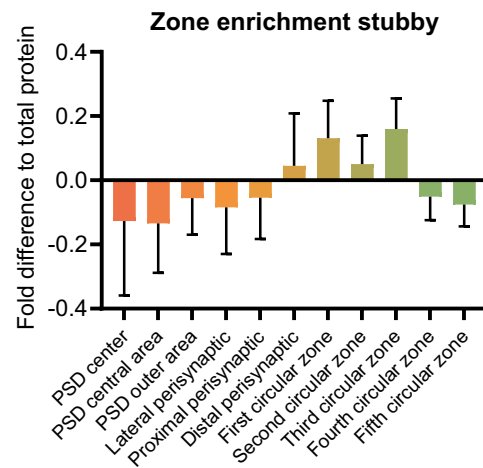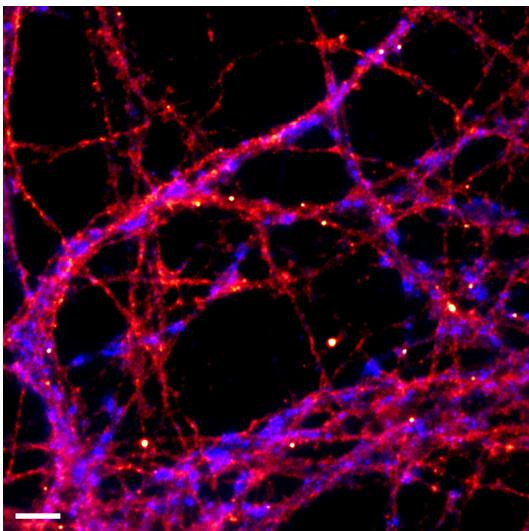

|                        |                            |                 |
|------------------------|----------------------------|-----------------|
| Whole cell copy number | 76270019.6 ± 3296093.2     |                 |
| Spine copy number      | 1966.1 ± 3626.0            |                 |
| Function               | SNAREs and assoc. proteins |                 |
|                        | Mushroom                   | Stubby          |
| Spine copy number      | 1362.8 ± 2513.3            | 2922.1 ± 5389.1 |
| % of total protein     | 0.2 ± 0.3%                 | 0.3 ± 0.5%      |
| Molarity (μM)          | 17.3 ± 31.9                | 27.6 ± 50.9     |
| PSD copy number        | 113 ± 208.4                | 234 ± 431.6     |
| % in PSD               | 8.3 ± 15.3%                | 8.0 ± 14.8%     |

|          | Spine copy number   | % of total protein | Molarity ( $\mu\text{M}$ ) | PSD copy number |
|----------|---------------------|--------------------|----------------------------|-----------------|
| Mushroom | $1362.8 \pm 2513.3$ | $0.2 \pm 0.3\%$    | $17.3 \pm 31.9$            | $113 \pm 208.4$ |
| Stubby   | $2922.1 \pm 5389.1$ | $0.3 \pm 0.5\%$    | $27.6 \pm 50.9$            | $234 \pm 431.6$ |

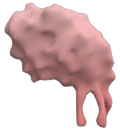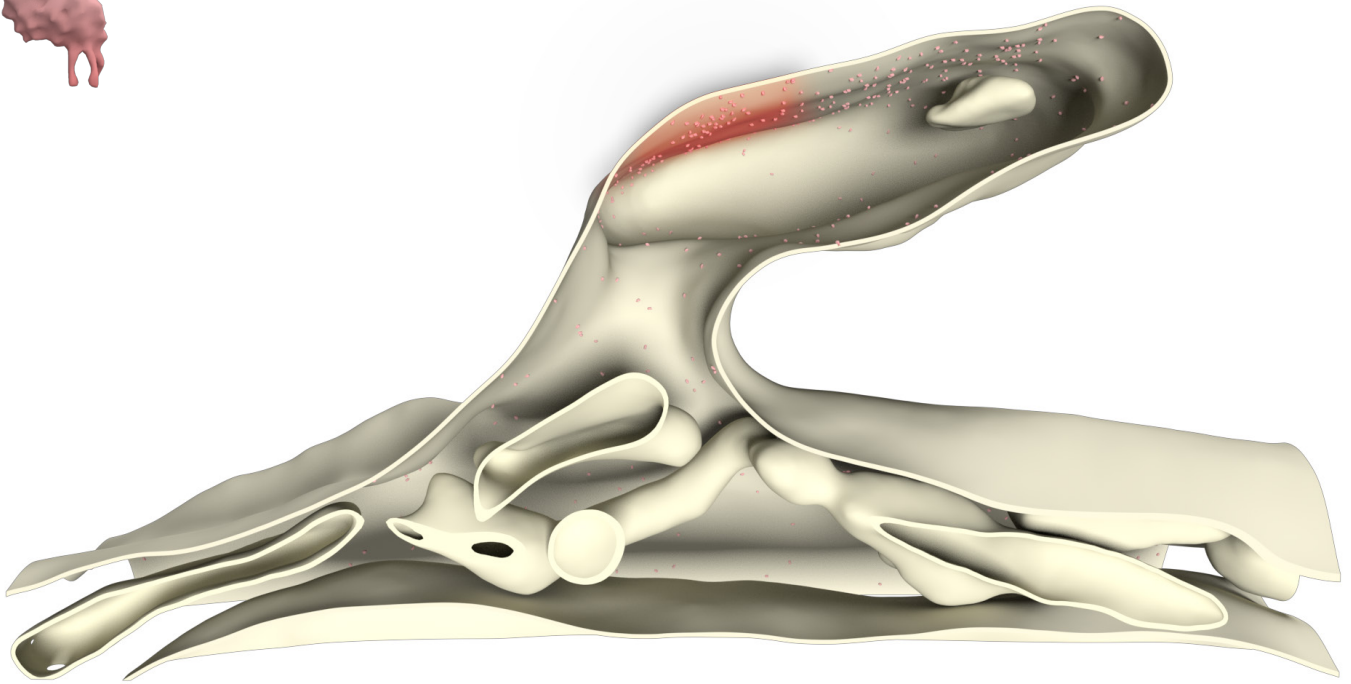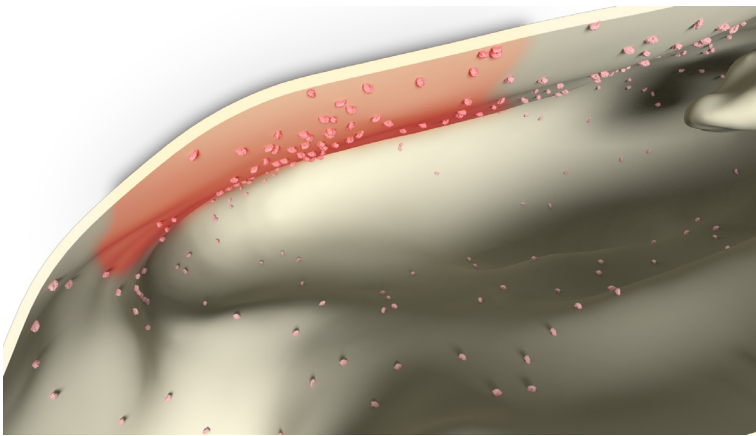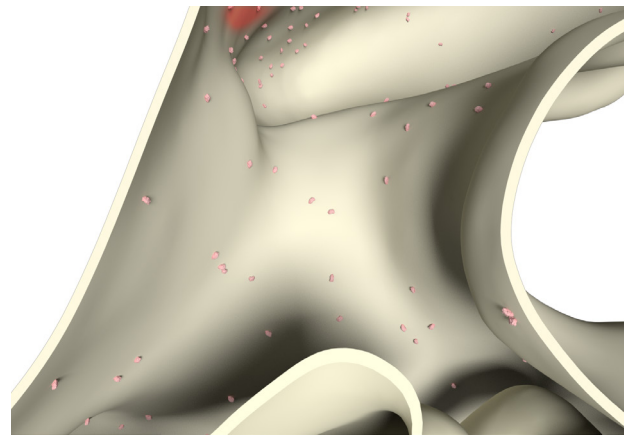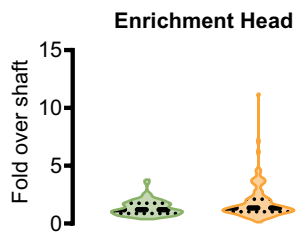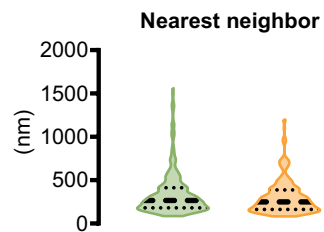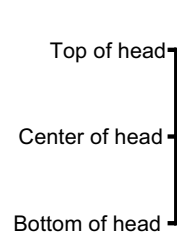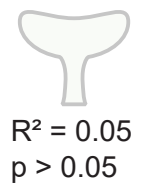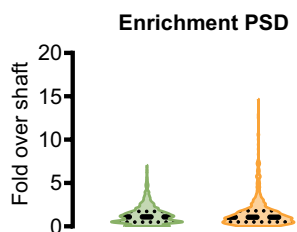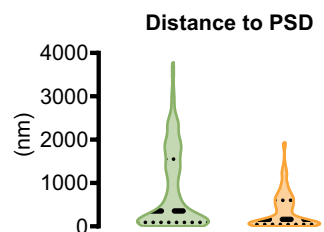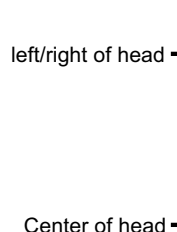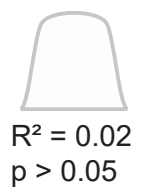

|          | Spine copy number   | % of total protein | Molarity ( $\mu\text{M}$ ) | PSD copy number |
|----------|---------------------|--------------------|----------------------------|-----------------|
| Mushroom | $1362.8 \pm 2513.3$ | $0.2 \pm 0.3\%$    | $17.3 \pm 31.9$            | $113 \pm 208.4$ |
| Stubby   | $2922.1 \pm 5389.1$ | $0.3 \pm 0.5\%$    | $27.6 \pm 50.9$            | $234 \pm 431.6$ |

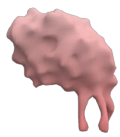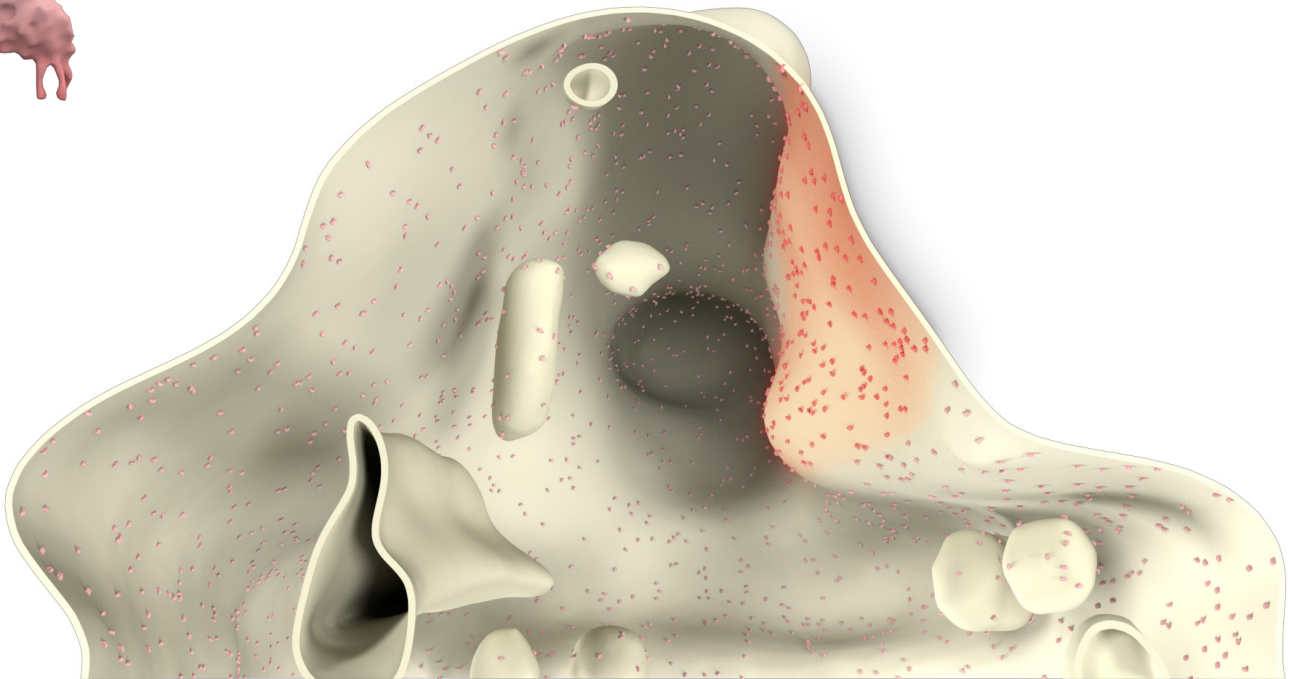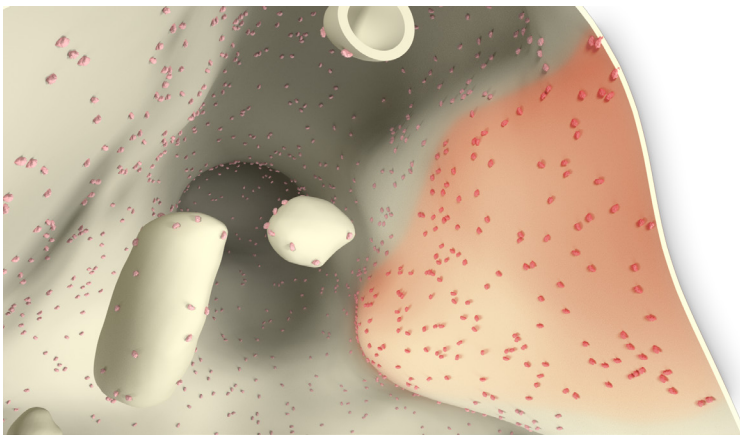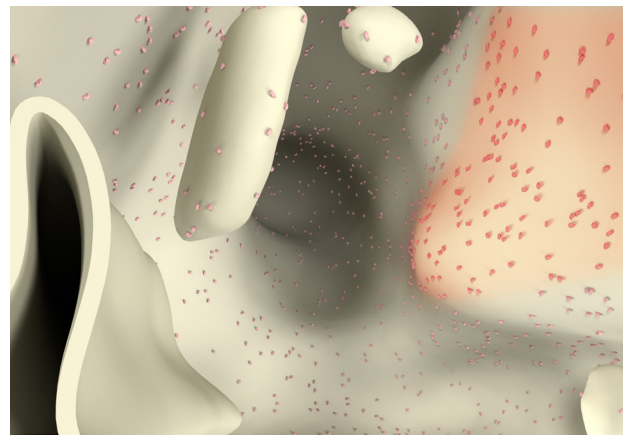

## References

**Antibody:** Synaptic Systems 111 011

**Structure:** From Takamori et al. 2006

### Literature:

Aikawa et al., 2006, Mol. Biol. Cell.

Gu and Huganir, 2016, Proc. Natl. Acad. Sci. U S A

Gu et al., 2016, Proc. Natl. Acad. Sci. U S A

Lau et al., 2010, J. Neurosci.

McMahon and Südhof, 1995, J. Biol. Chem.

Söllner et al., 1993a, Nature

Veit et al., 1996, FEBS Lett.



SNAP29 (Gs32, Gene: Snap29, Uniprot ID: Q9Z2P6)

**Known function:** Qbc SNARE, Autophagosome-lysosome fusion, Inhibition of SNARE complex disassembly

**Known organization:** Membrane-associated, On Golgi, Endosomes, SV, Also in cytosol

**Known Interactions:** Syntaxin3, Syntaxin6, VAMP7, SNARE complexes in general

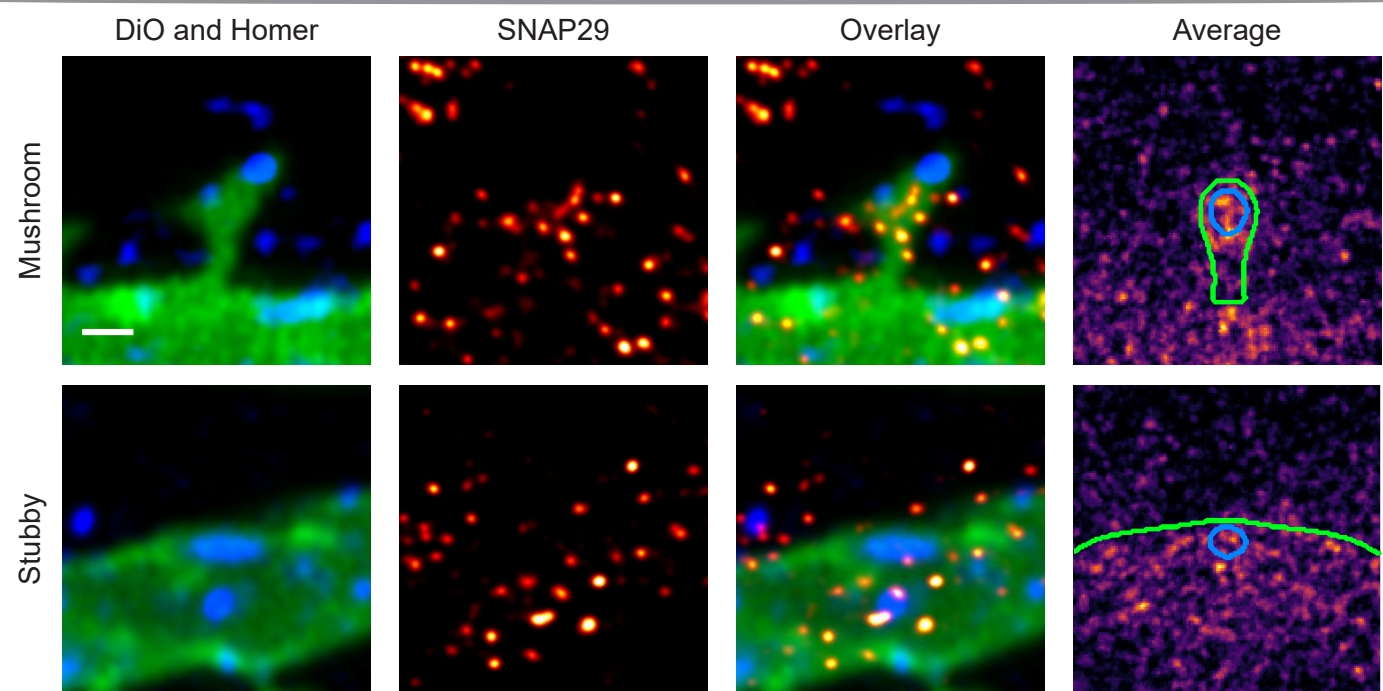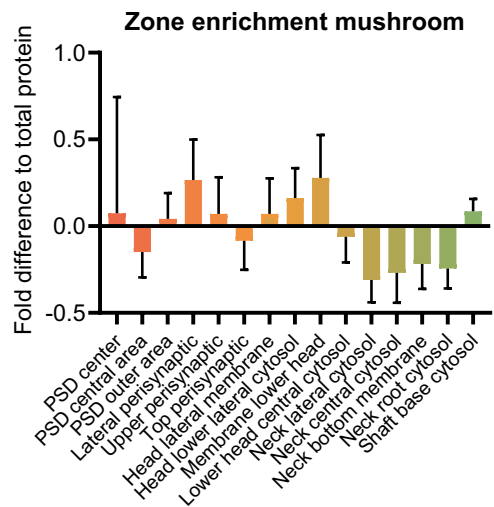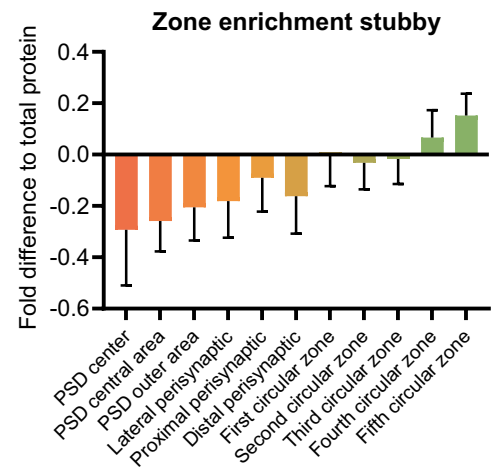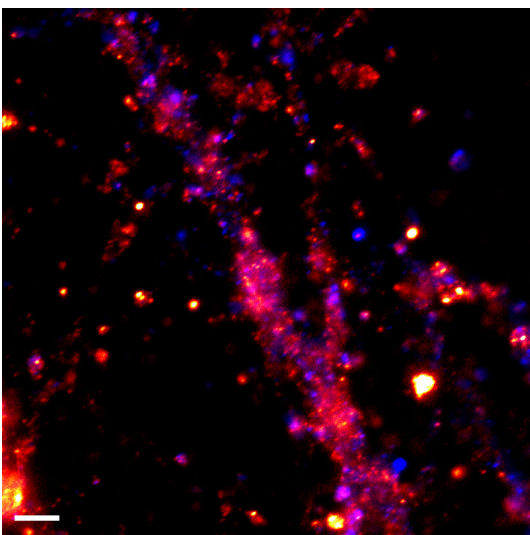

|                        |                            |             |
|------------------------|----------------------------|-------------|
| Whole cell copy number | 631022.8 ± 160061.0        |             |
| Spine copy number      | 54.7 ± 31.2                |             |
| Function               | SNAREs and assoc. proteins |             |
|                        | Mushroom                   | Stubby      |
| Spine copy number      | 47.9 ± 27.3                | 68.2 ± 38.9 |
| % of total protein     | 0.0 ± 0.0%                 | 0.0 ± 0.0%  |
| Molarity (μM)          | 0.6 ± 0.3                  | 0.6 ± 0.4   |
| PSD copy number        | 0 ± 0.0                    | 0 ± 0.0     |
| % in PSD               | 0.0 ± 0.0%                 | 0.0 ± 0.0%  |

|          | Spine copy number | % of total protein | Molarity ( $\mu\text{M}$ ) | PSD copy number |
|----------|-------------------|--------------------|----------------------------|-----------------|
| Mushroom | $47.9 \pm 27.3$   | $0.0 \pm 0.0\%$    | $0.6 \pm 0.3$              | $0 \pm 0.0$     |
| Stubby   | $68.2 \pm 38.9$   | $0.0 \pm 0.0\%$    | $0.6 \pm 0.4$              | $0 \pm 0.0$     |

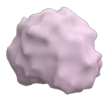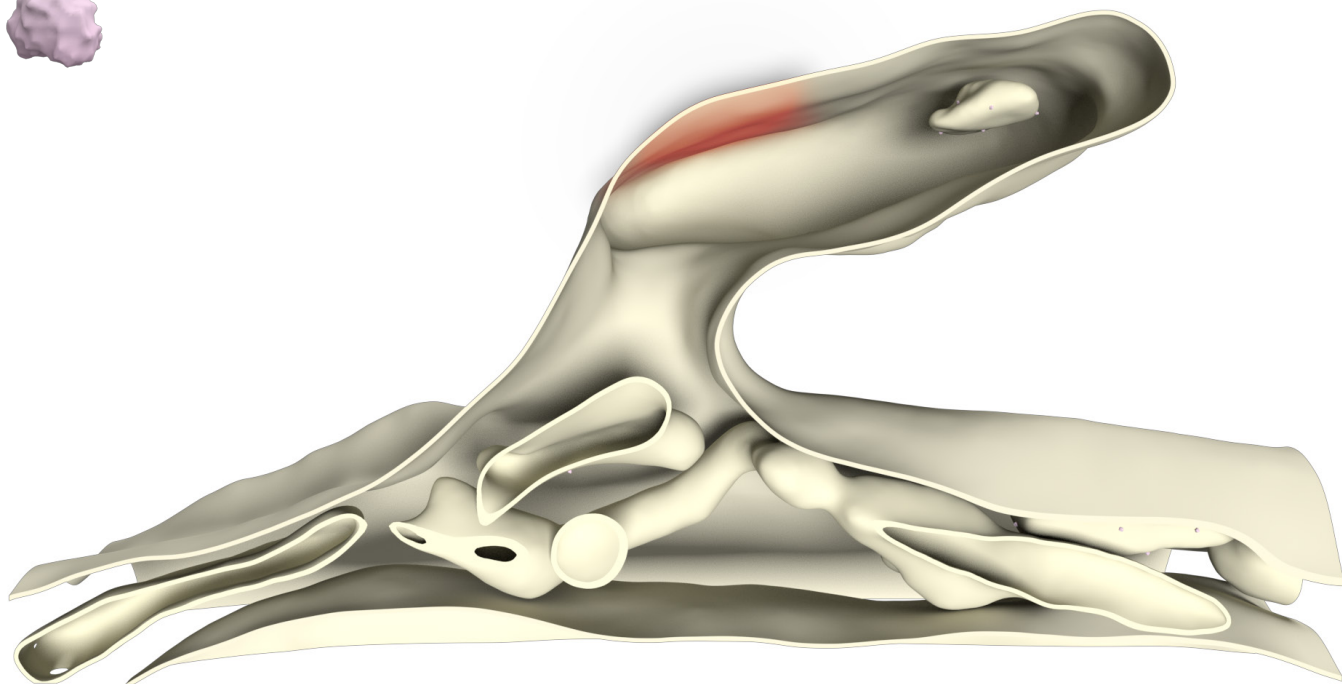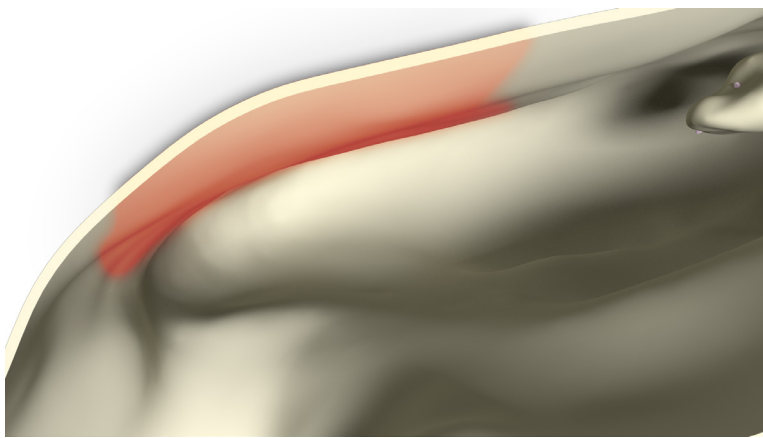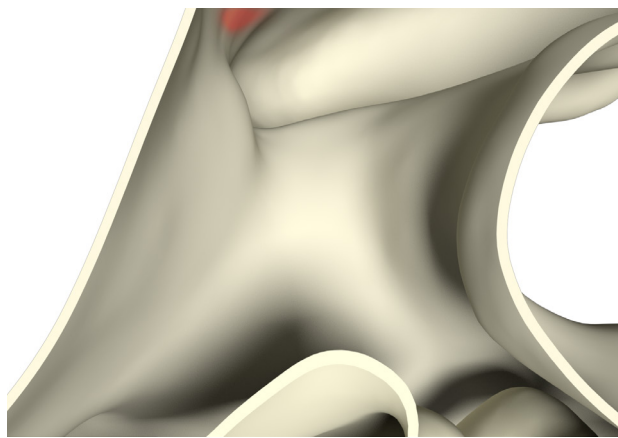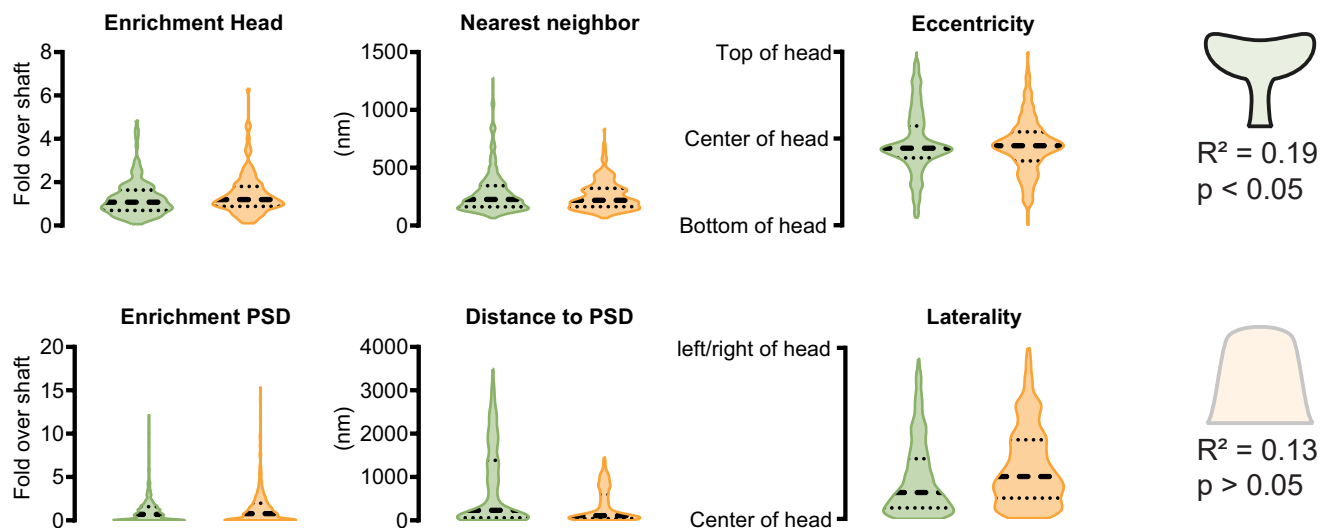

|          | Spine copy number | % of total protein | Molarity ( $\mu\text{M}$ ) | PSD copy number |
|----------|-------------------|--------------------|----------------------------|-----------------|
| Mushroom | $47.9 \pm 27.3$   | $0.0 \pm 0.0\%$    | $0.6 \pm 0.3$              | $0 \pm 0.0$     |
| Stubby   | $68.2 \pm 38.9$   | $0.0 \pm 0.0\%$    | $0.6 \pm 0.4$              | $0 \pm 0.0$     |

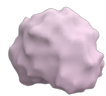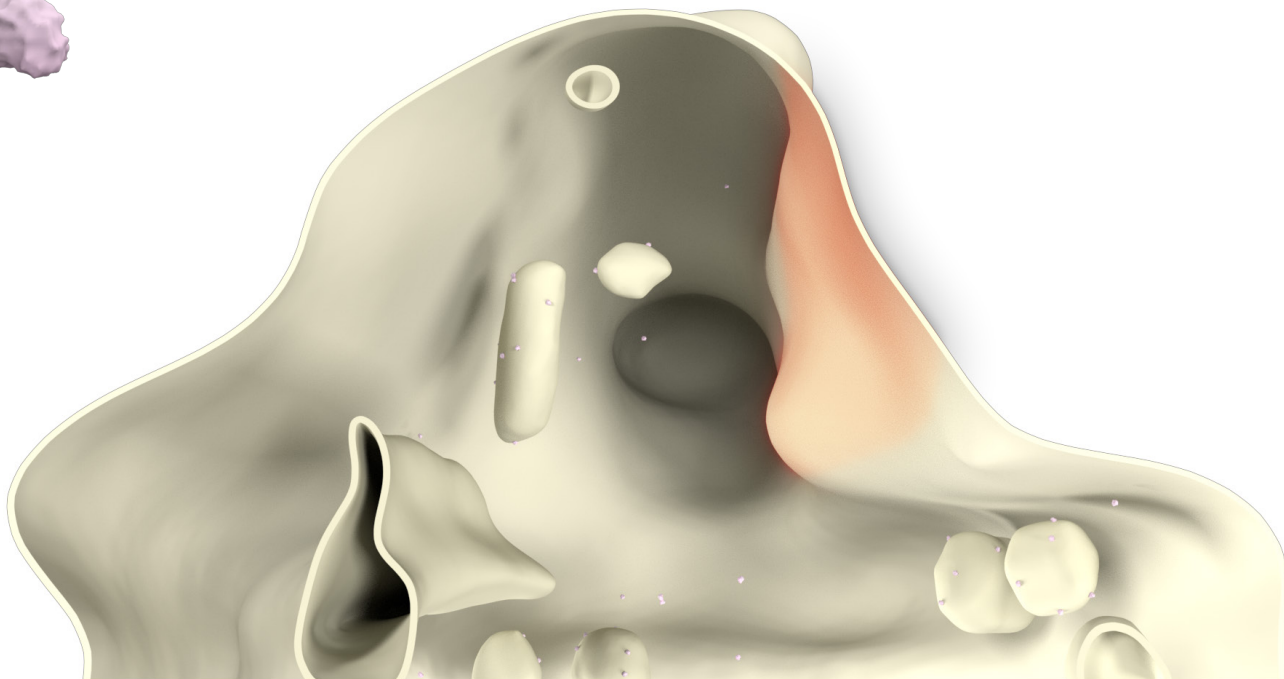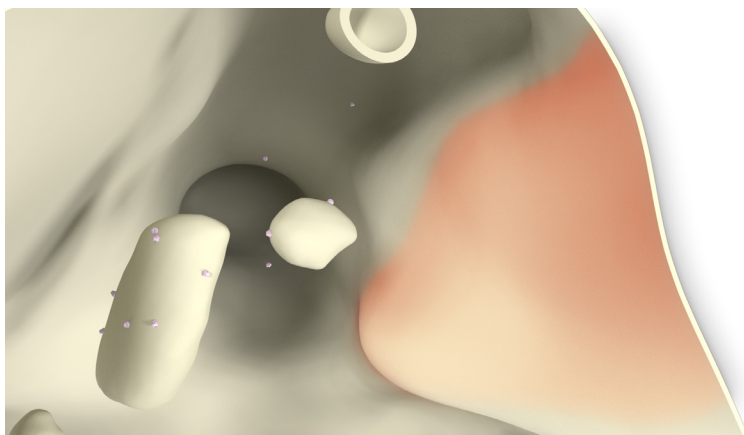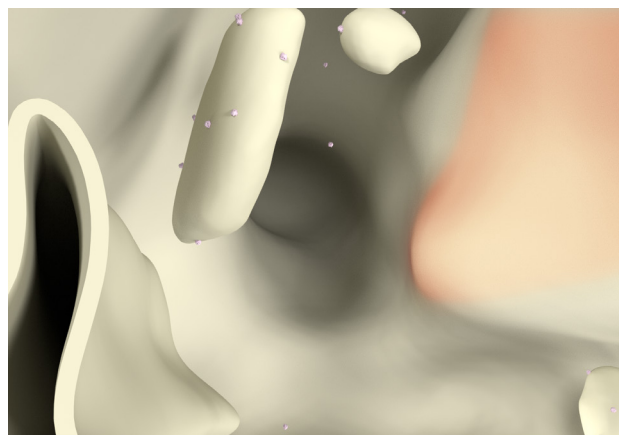

## References

**Antibody:** Synaptic Systems 111 302

**Structure:** From Takamori et al. 2006

### Literature:

Pan et al., 2005, J. Biol. Chem.

Steegmaier et al., 1998, J. Biol. Chem.

Su et al., 2001, Proc. Natl. Acad. Sci. U S A

Wang et al., 2016, Mol. Cell

Wong et al., 1999, Mol. Biol. Cell.



## SNAP47 (Gene: Snap47, Uniprot ID: Q6P6S0)

**Known function:** Qbc SNARE, AMPAR surface delivery during LTP, BDNF release

**Known organization:** Cytosolic, Perisynaptic in spines

**Known Interactions:** Syntaxin1, Syntaxin3, VAMP2

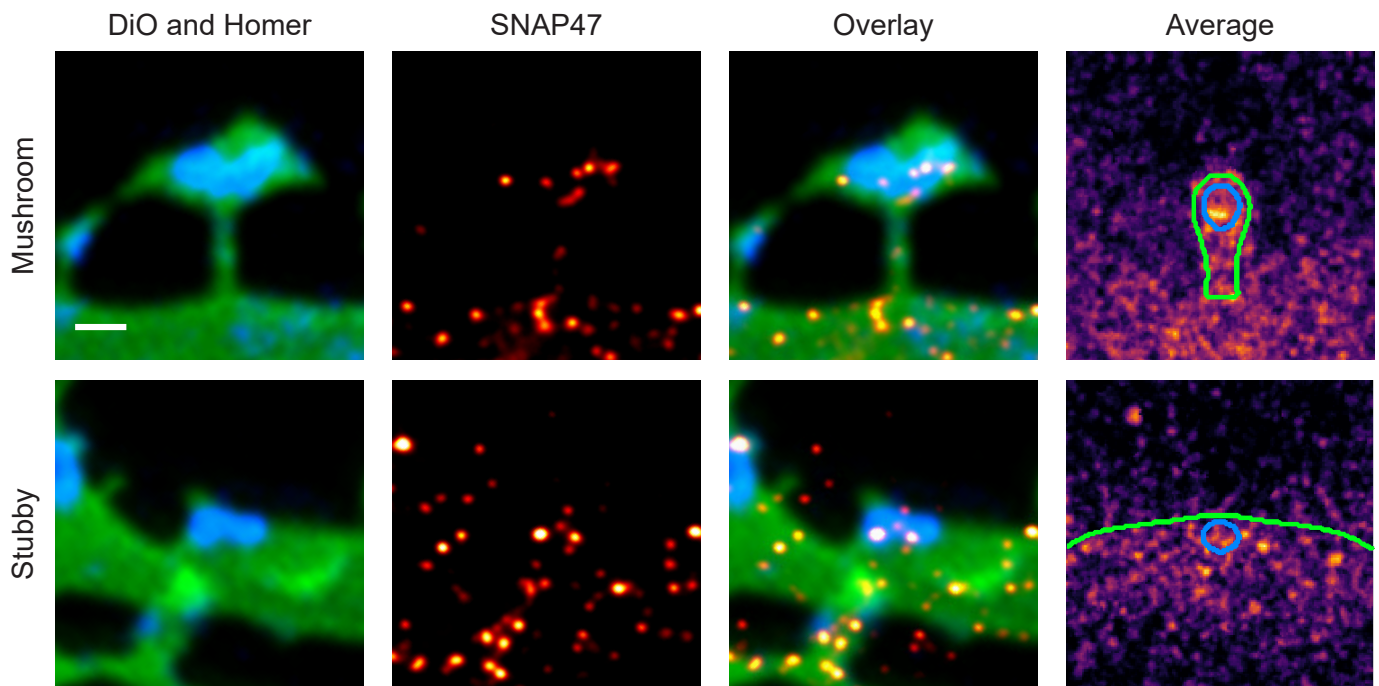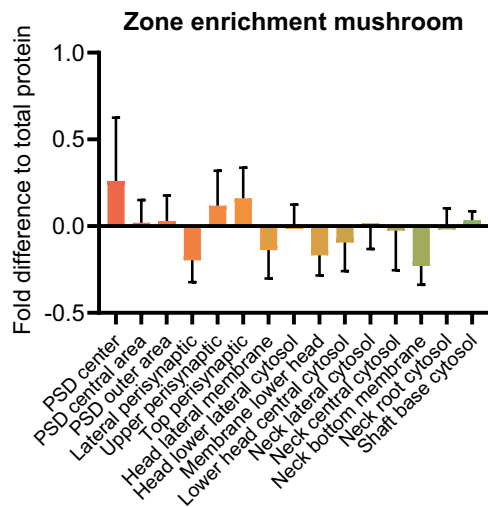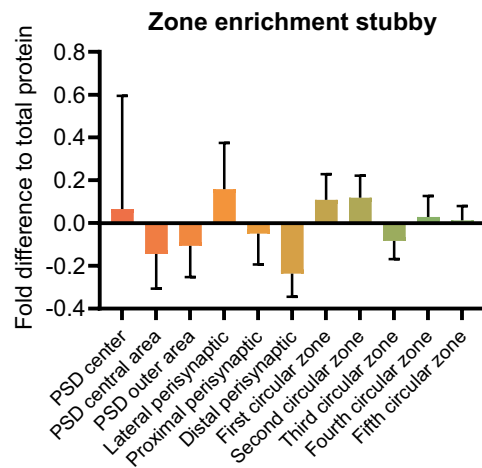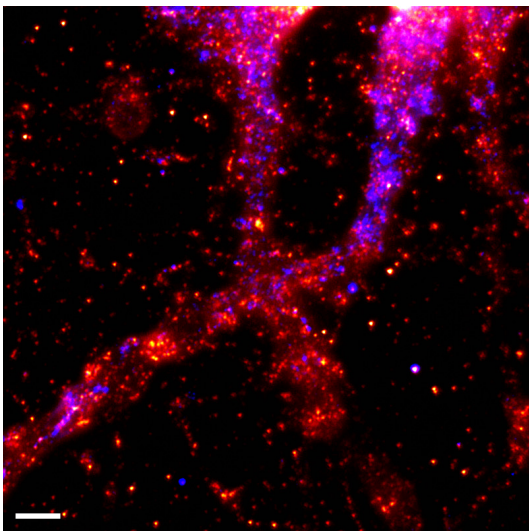

|                        |                            |            |
|------------------------|----------------------------|------------|
| Whole cell copy number | 50990.1 ± 15185.5          |            |
| Spine copy number      | 10.0 ± 3.4                 |            |
| Function               | SNAREs and assoc. proteins |            |
|                        | Mushroom                   | Stubby     |
| Spine copy number      | 10.4 ± 3.5                 | 9.9 ± 3.4  |
| % of total protein     | 0.0 ± 0.0%                 | 0.0 ± 0.0% |
| Molarity (μM)          | 0.1 ± 0.0                  | 0.1 ± 0.0  |
| PSD copy number        | 0 ± 0.0                    | 0 ± 0.0    |
| % in PSD               | 0.0 ± 0.0%                 | 0.0 ± 0.0% |

|          | Spine copy number | % of total protein | Molarity ( $\mu\text{M}$ ) | PSD copy number |
|----------|-------------------|--------------------|----------------------------|-----------------|
| Mushroom | $10.4 \pm 3.5$    | $0.0 \pm 0.0\%$    | $0.1 \pm 0.0$              | $0 \pm 0.0$     |
| Stubby   | $9.9 \pm 3.4$     | $0.0 \pm 0.0\%$    | $0.1 \pm 0.0$              | $0 \pm 0.0$     |

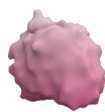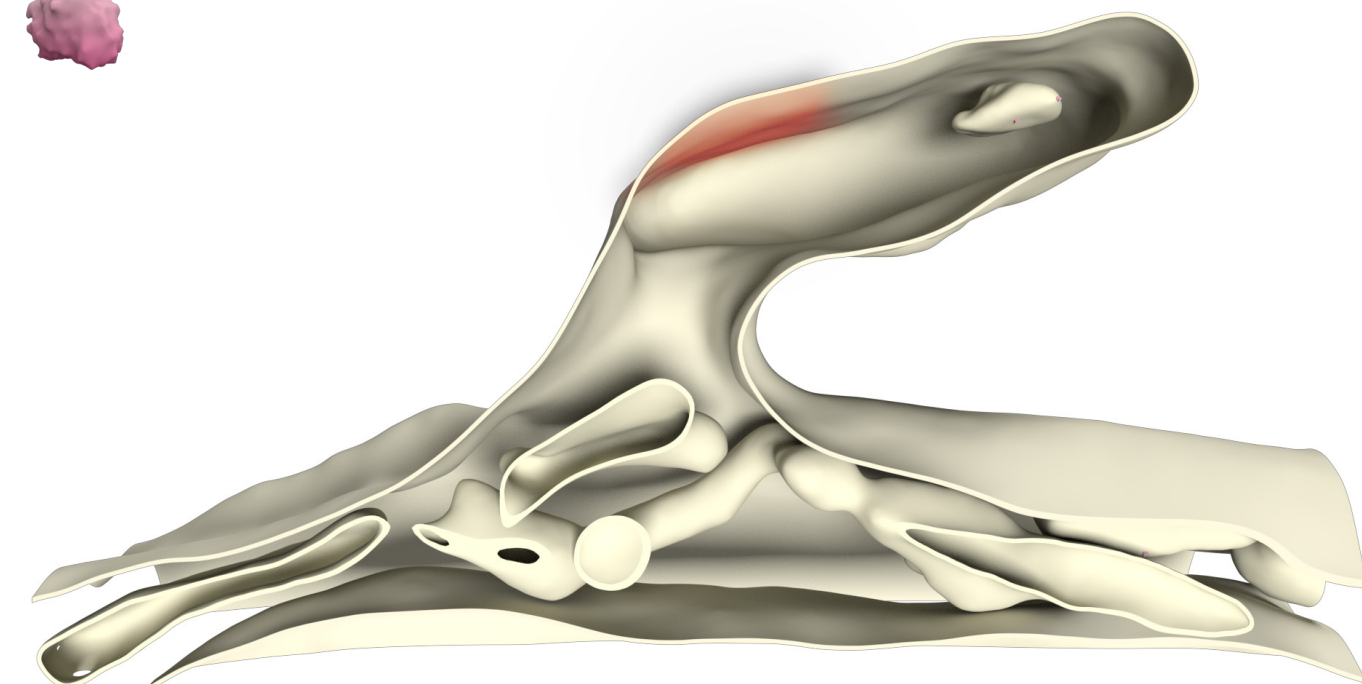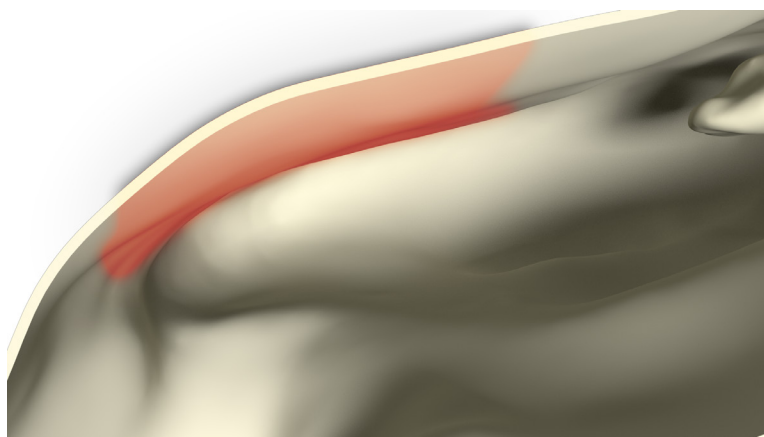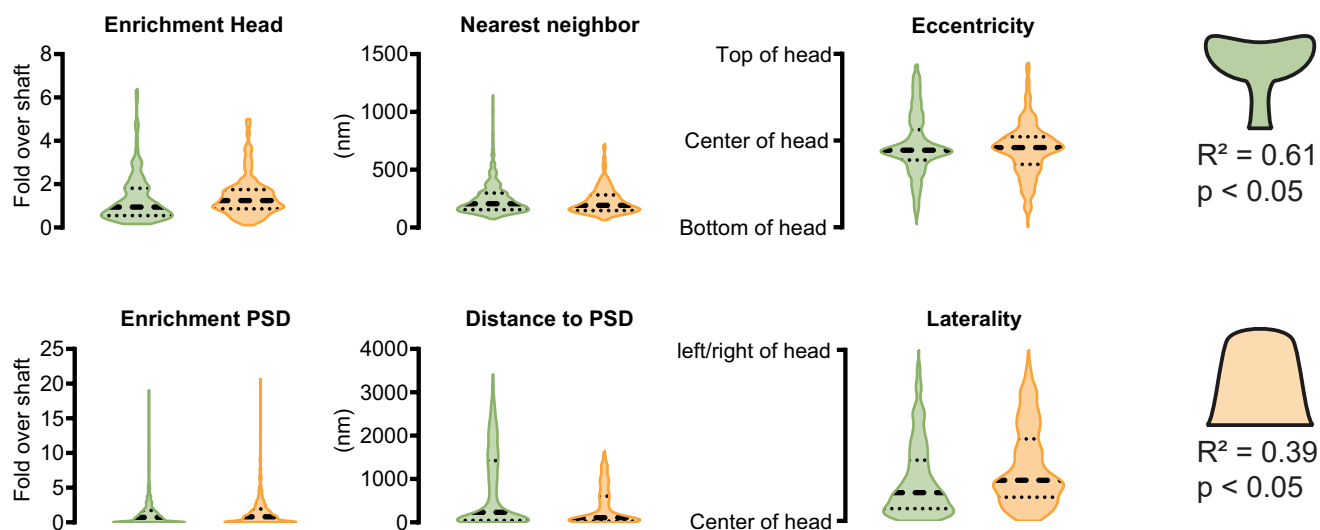

|          | Spine copy number | % of total protein | Molarity ( $\mu\text{M}$ ) | PSD copy number |
|----------|-------------------|--------------------|----------------------------|-----------------|
| Mushroom | $10.4 \pm 3.5$    | $0.0 \pm 0.0\%$    | $0.1 \pm 0.0$              | $0 \pm 0.0$     |
| Stubby   | $9.9 \pm 3.4$     | $0.0 \pm 0.0\%$    | $0.1 \pm 0.0$              | $0 \pm 0.0$     |

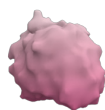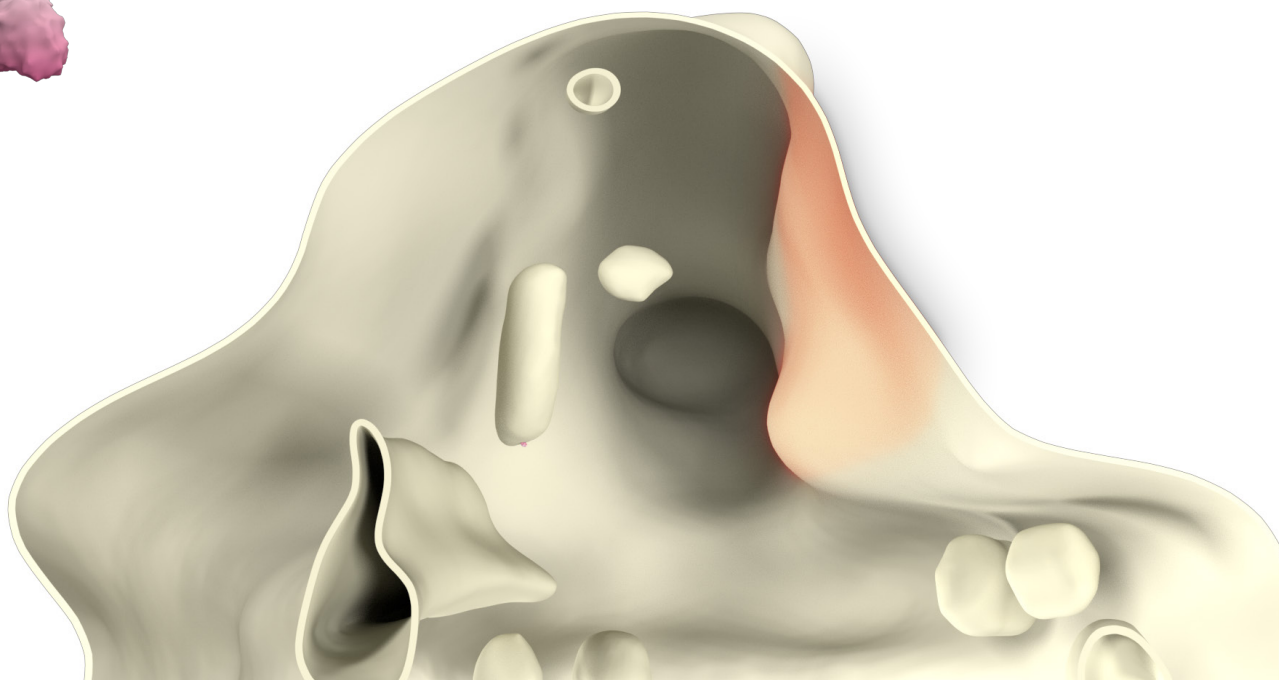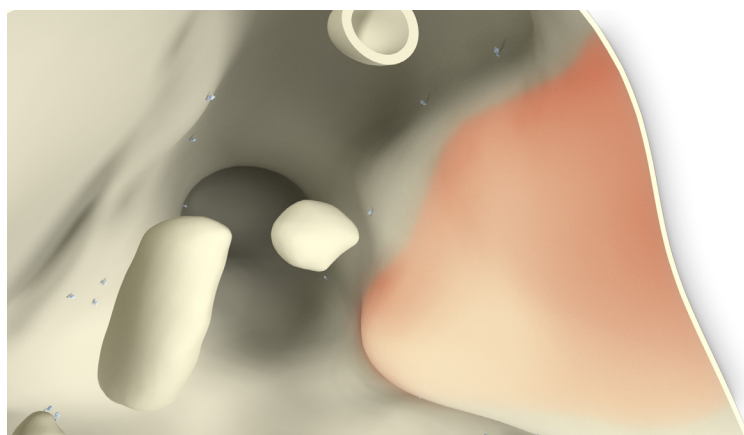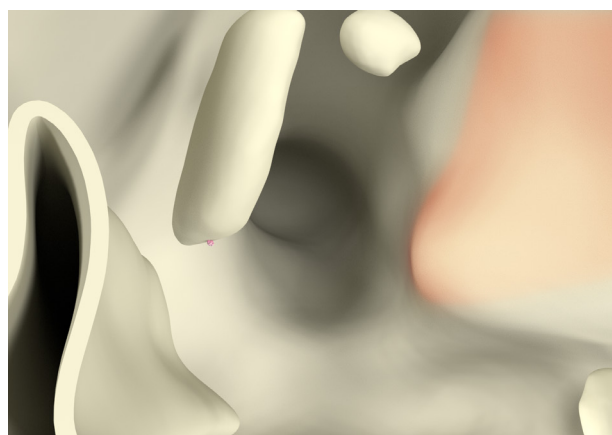

## References

**Antibody:** Synaptic Systems 111 403

**PDB Identifier:** Modified SNAP29

### Literature:

Holt et al., 2006, J. Biol. Chem.

Jurado et al., 2013, Neuron

Münster-Wandowski et al., 2017

Shimojo et al., 2015, Front. Neuroanat.



Synaptotagmin4 (Gene: Syt4, Uniprot ID: P50232)

Known function: Retrograde signalling in drosophila

Known organization: Transmembrane protein

Known Interactions: None

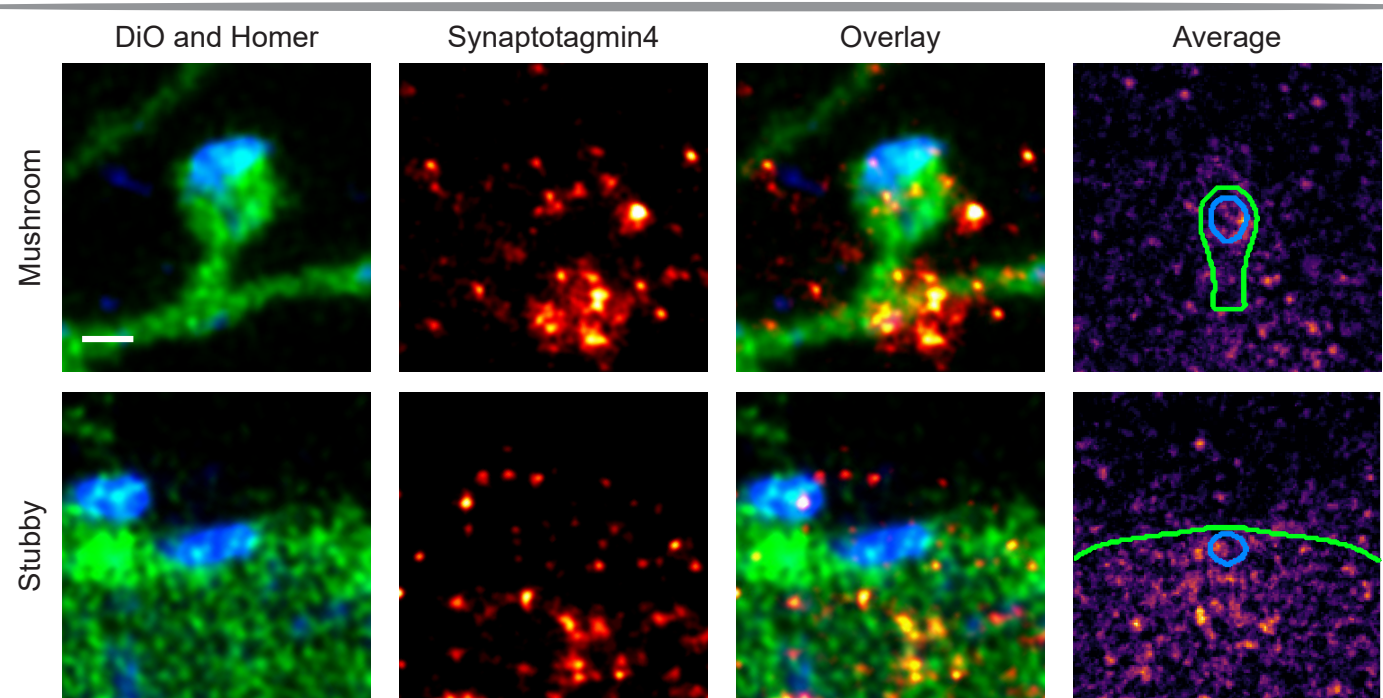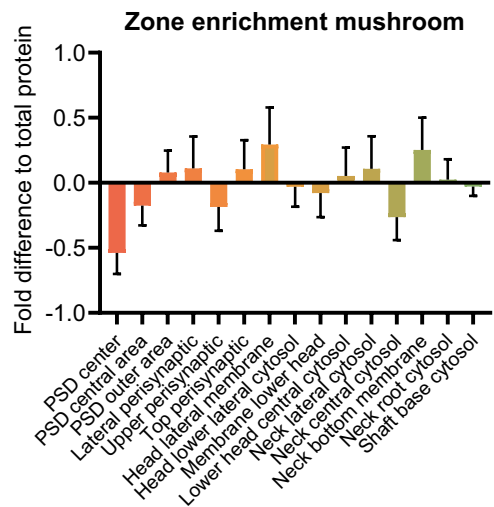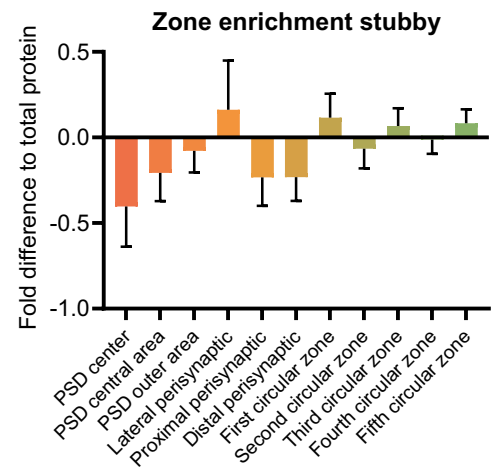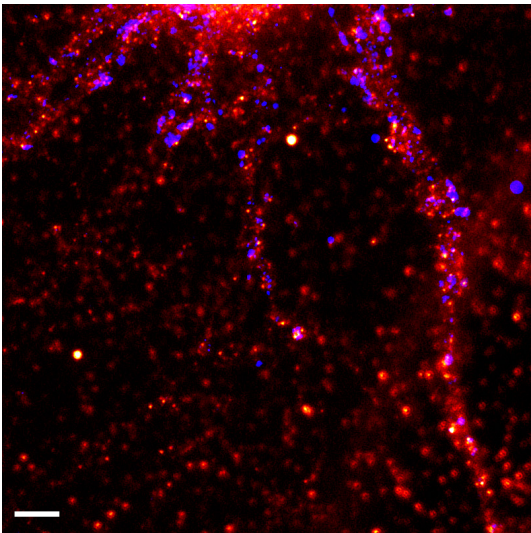

|                        |                            |            |
|------------------------|----------------------------|------------|
| Whole cell copy number | 96692.0 ± 19519.0          |            |
| Spine copy number      | 4.2 ± 2.2                  |            |
| Function               | SNAREs and assoc. proteins |            |
|                        | Mushroom                   | Stubby     |
| Spine copy number      | 3.1 ± 1.6                  | 5.6 ± 2.9  |
| % of total protein     | 0.0 ± 0.0%                 | 0.0 ± 0.0% |
| Molarity (µM)          | 0.0 ± 0.0                  | 0.1 ± 0.0  |
| PSD copy number        | 1 ± 0.5                    | 0 ± 0.0    |
| % in PSD               | 32.5 ± 17.0%               | 0.0 ± 0.0% |

|          | Spine copy number | % of total protein | Molarity ( $\mu\text{M}$ ) | PSD copy number |
|----------|-------------------|--------------------|----------------------------|-----------------|
| Mushroom | $3.1 \pm 1.6$     | $0.0 \pm 0.0\%$    | $0.0 \pm 0.0$              | $1 \pm 0.5$     |
| Stubby   | $5.6 \pm 2.9$     | $0.0 \pm 0.0\%$    | $0.1 \pm 0.0$              | $0 \pm 0.0$     |

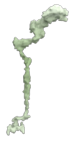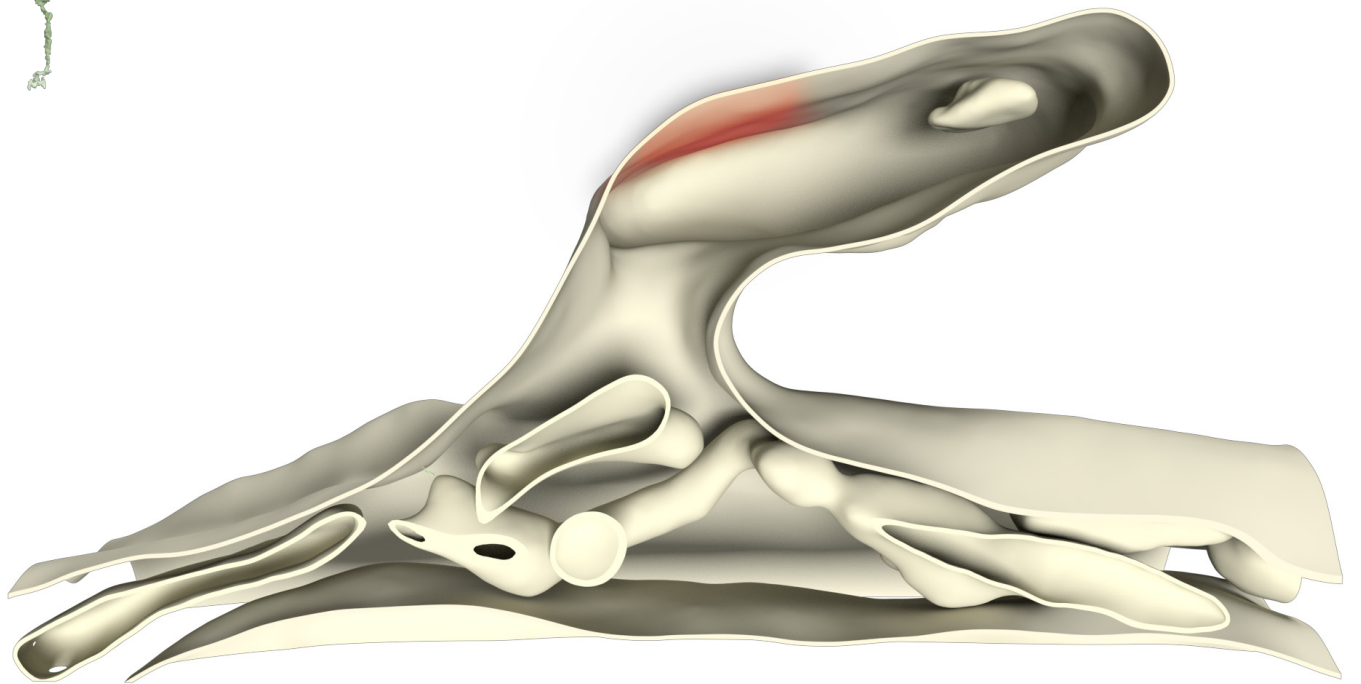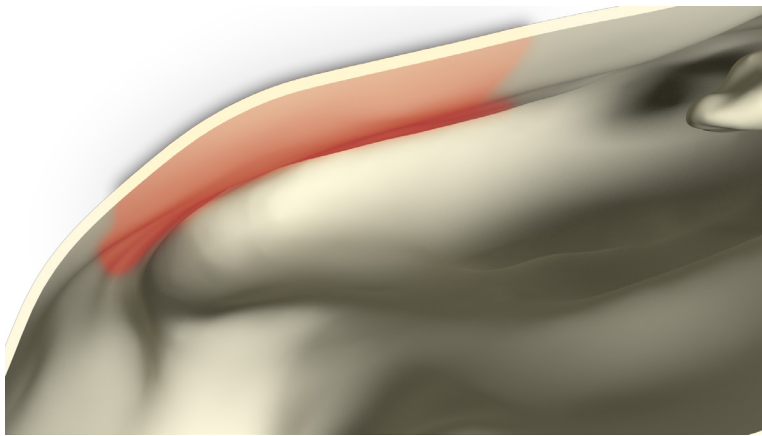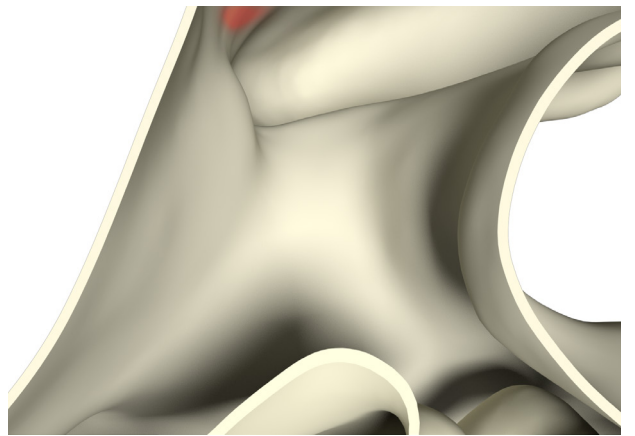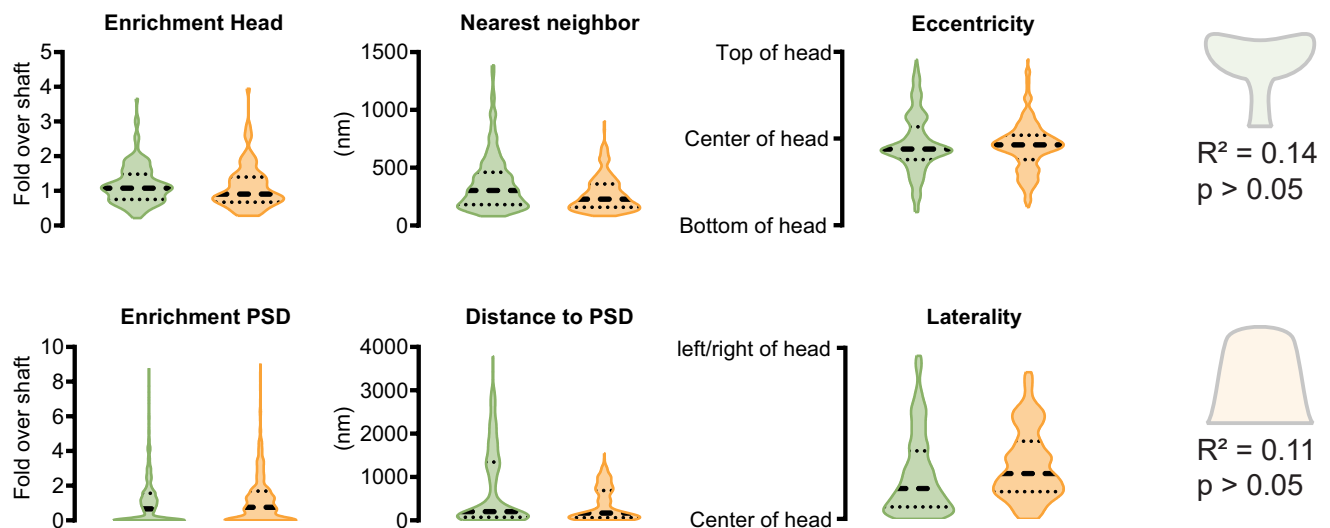

|          | Spine copy number | % of total protein | Molarity ( $\mu\text{M}$ ) | PSD copy number |
|----------|-------------------|--------------------|----------------------------|-----------------|
| Mushroom | $3.1 \pm 1.6$     | $0.0 \pm 0.0\%$    | $0.0 \pm 0.0$              | $1 \pm 0.5$     |
| Stubby   | $5.6 \pm 2.9$     | $0.0 \pm 0.0\%$    | $0.1 \pm 0.0$              | $0 \pm 0.0$     |

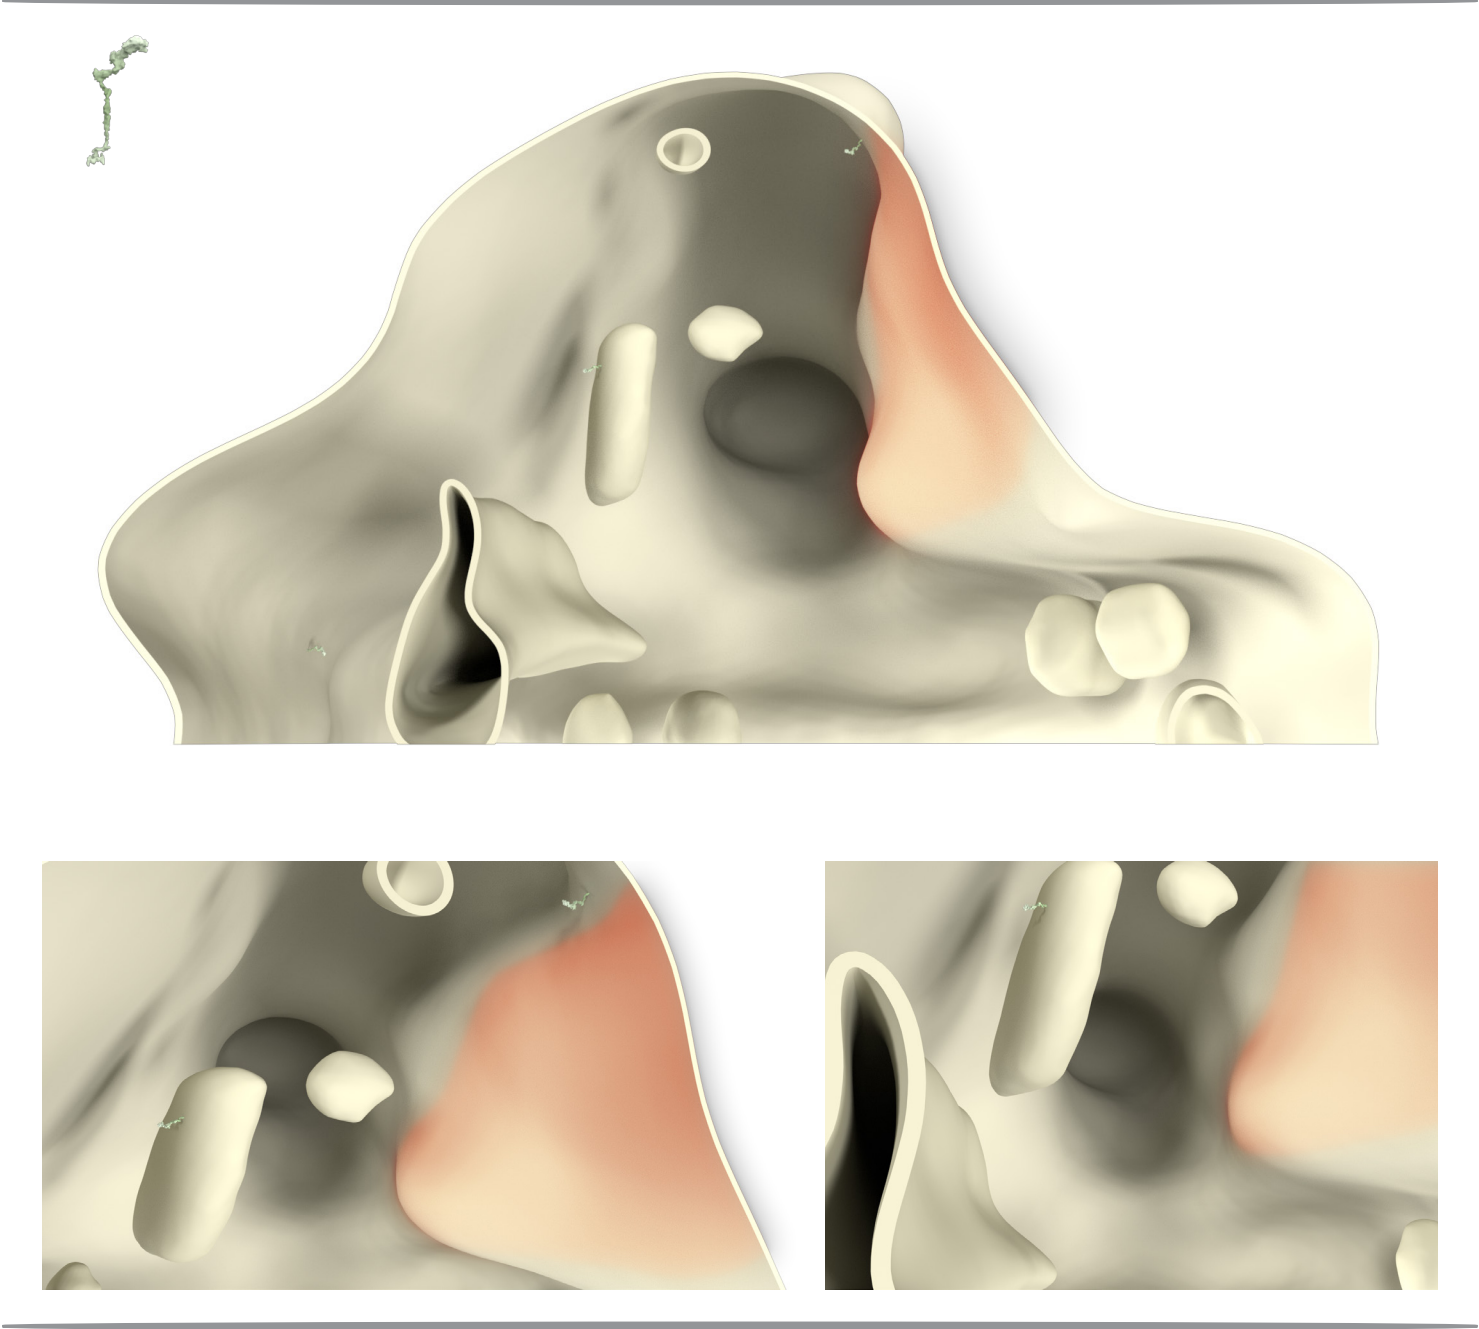

### References

**Antibody:** Synaptic Systems 105 143

**PDB Identifier:** 6ank

**Literature:**

Harris et al., 2016, Elife

Korkut et al., 2013, Neuron

Yoshihara et al., 2005, Science



**Synaptotagmin5 (Synaptotagmin9, Gene: Syt5, Uniprot ID: P47861)**

**Known function:** Involved in dense-core vesicle as well as insulin exocytosis  
**Known organization:** Transmembrane protein, On recycling endosome, LDCV  
**Known Interactions:** None

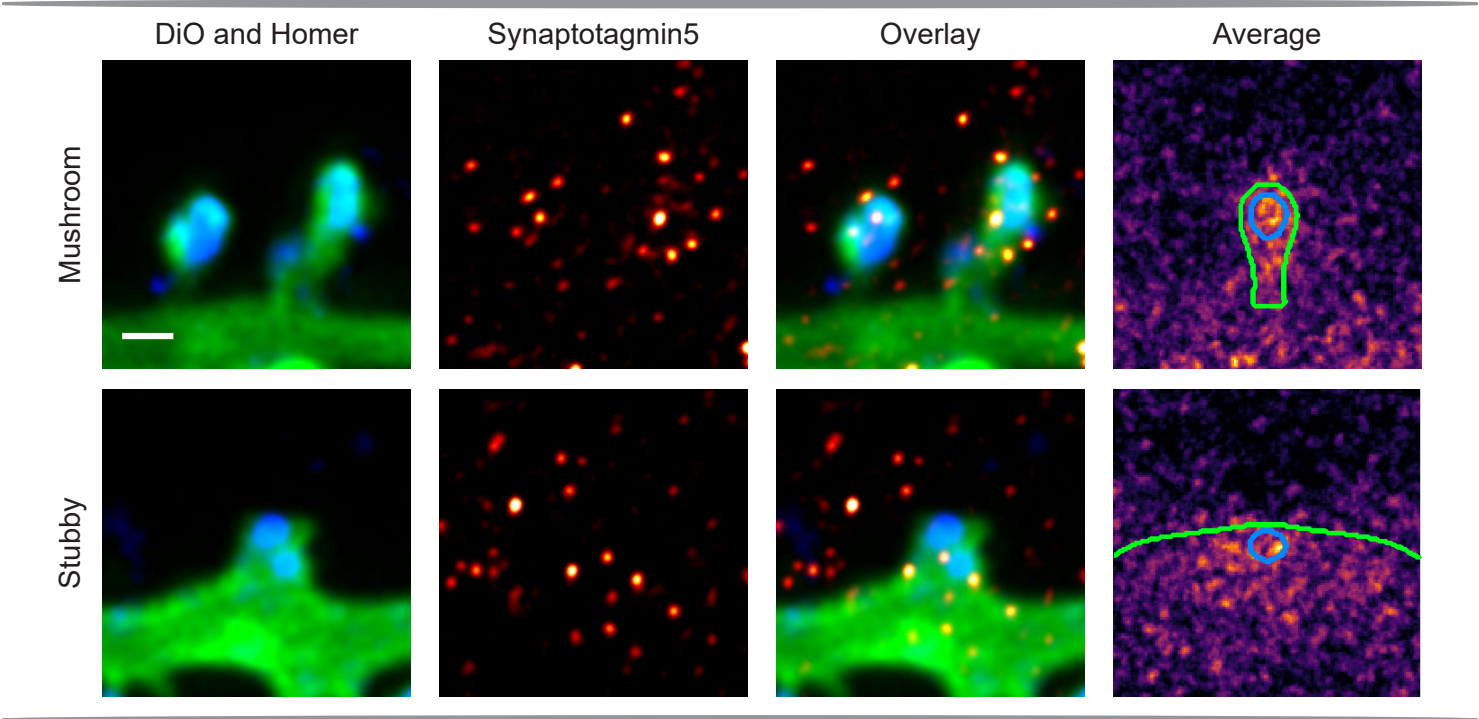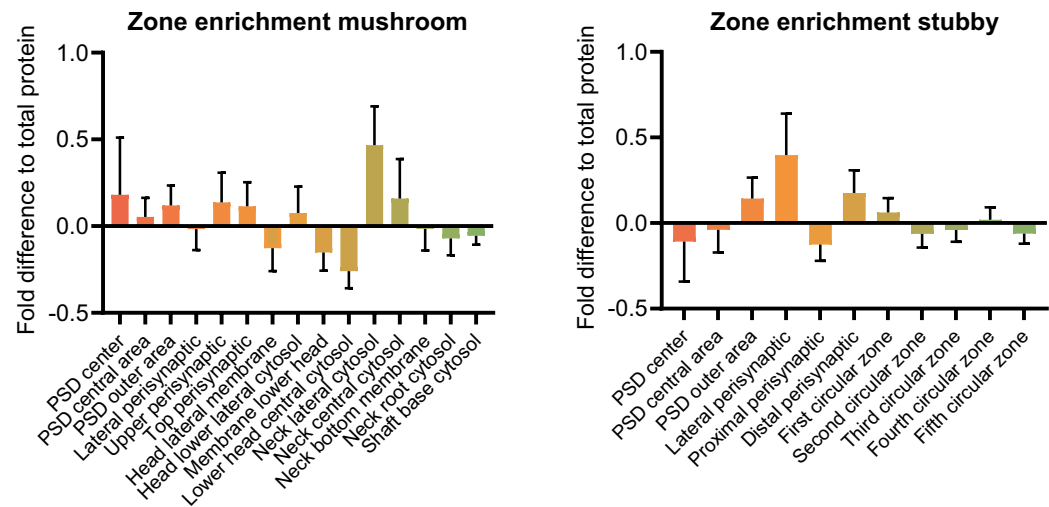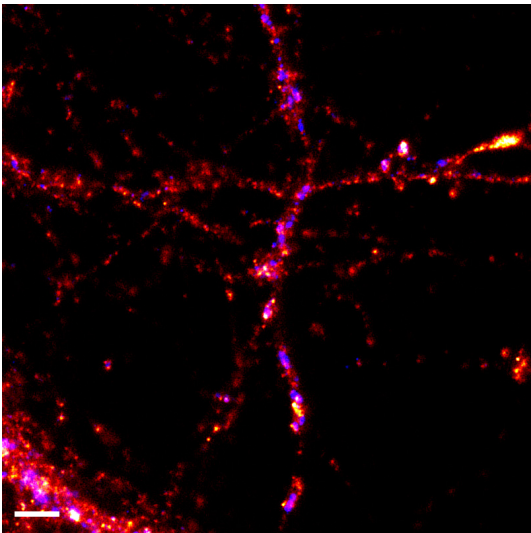

|                        |                            |              |
|------------------------|----------------------------|--------------|
| Whole cell copy number | 1400586.5 ± 179599.9       |              |
| Spine copy number      | 164.4 ± 54.3               |              |
| Function               | SNAREs and assoc. proteins |              |
|                        | Mushroom                   | Stubby       |
| Spine copy number      | 135.2 ± 44.7               | 219.2 ± 72.4 |
| % of total protein     | 0.0 ± 0.0%                 | 0.0 ± 0.0%   |
| Molarity (µM)          | 1.7 ± 0.6                  | 2.1 ± 0.7    |
| PSD copy number        | 5 ± 1.7                    | 6 ± 2.0      |
| % in PSD               | 3.7 ± 1.2%                 | 2.7 ± 0.9%   |

|          | Spine copy number | % of total protein | Molarity ( $\mu\text{M}$ ) | PSD copy number |
|----------|-------------------|--------------------|----------------------------|-----------------|
| Mushroom | $135.2 \pm 44.7$  | $0.0 \pm 0.0\%$    | $1.7 \pm 0.6$              | $5 \pm 1.7$     |
| Stubby   | $219.2 \pm 72.4$  | $0.0 \pm 0.0\%$    | $2.1 \pm 0.7$              | $6 \pm 2.0$     |

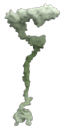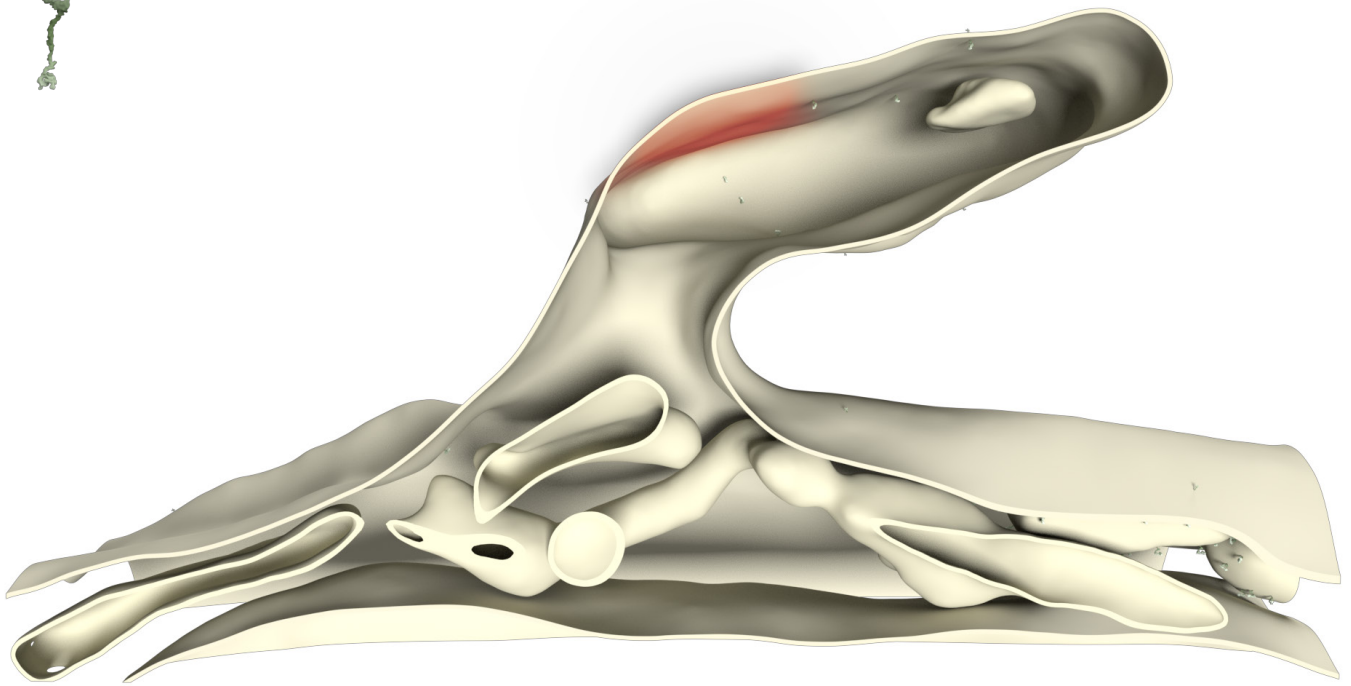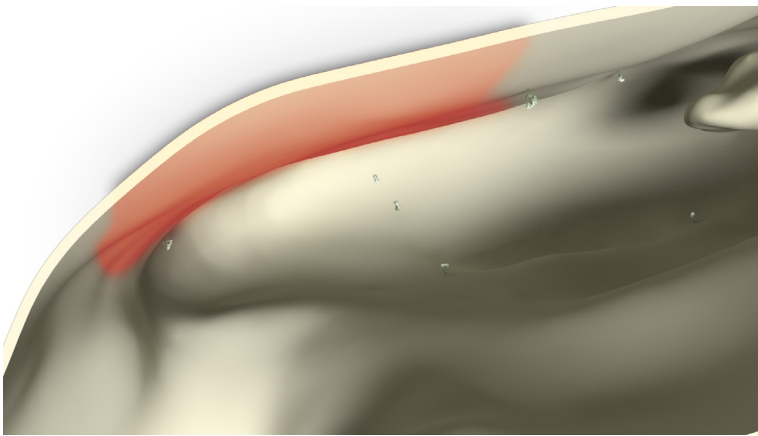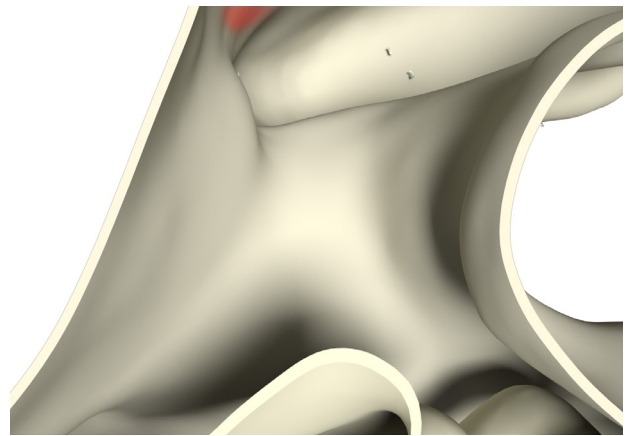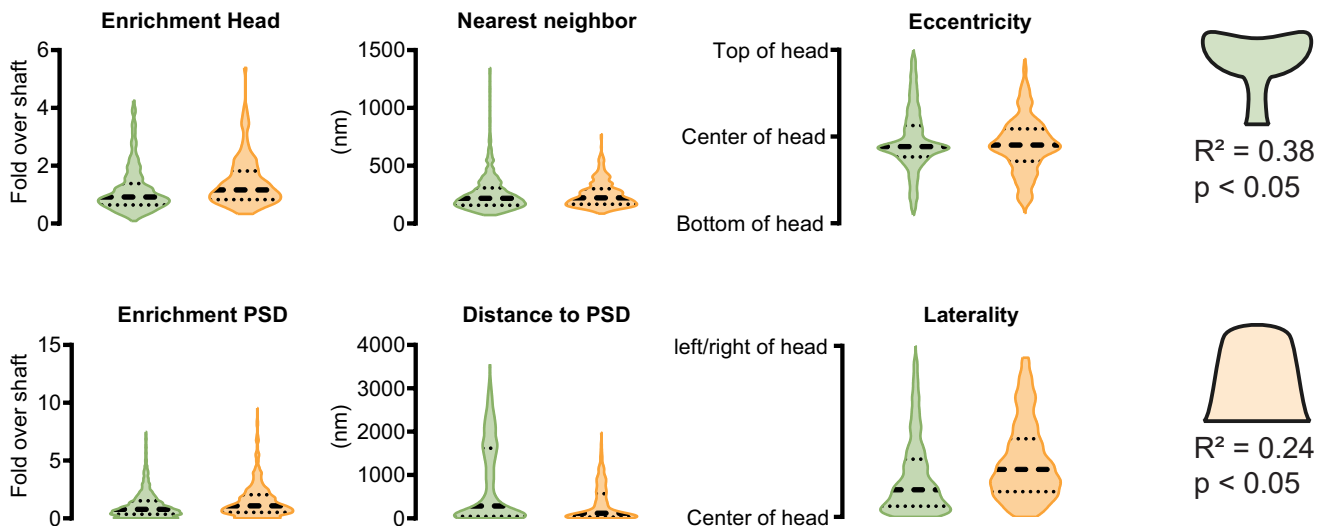

|          | Spine copy number | % of total protein | Molarity ( $\mu\text{M}$ ) | PSD copy number |
|----------|-------------------|--------------------|----------------------------|-----------------|
| Mushroom | $135.2 \pm 44.7$  | $0.0 \pm 0.0\%$    | $1.7 \pm 0.6$              | $5 \pm 1.7$     |
| Stubby   | $219.2 \pm 72.4$  | $0.0 \pm 0.0\%$    | $2.1 \pm 0.7$              | $6 \pm 2.0$     |

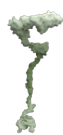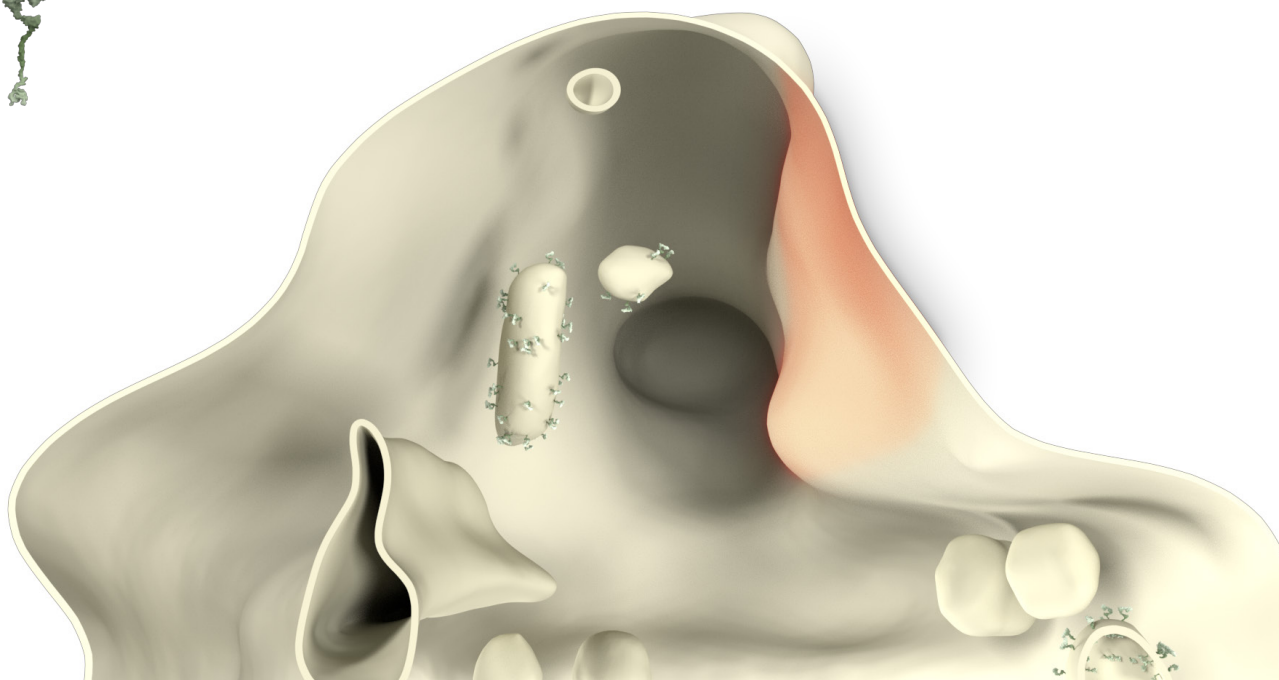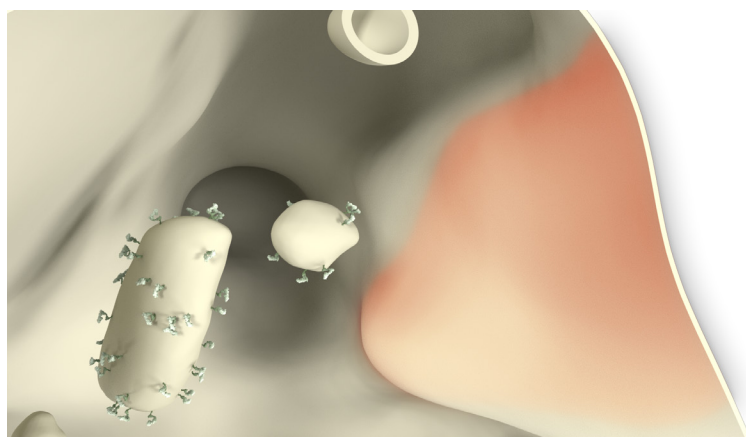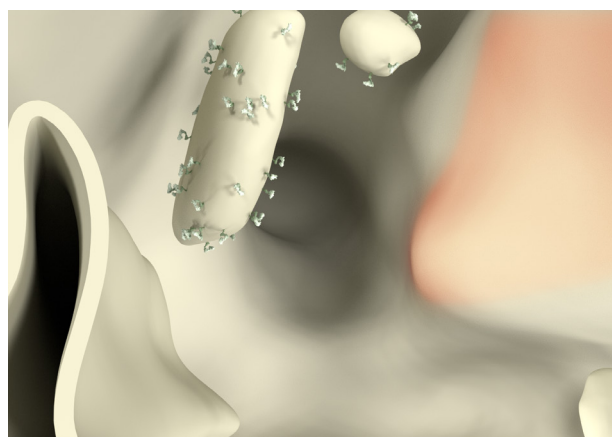

## References

**Antibody:** Synaptic Systems 105 053

**PDB Identifier:** 6ank

### Literature:

Hudson and Birnbaum, 1995, Proc. Natl. Acad. Sci.

U S A

Iezzi et al., 2004, J. Cell. Sci.

Saegusa et al., 2002, J. Biol. Chem.



Synaptotagmin7 (Gene: Syt7, Uniprot ID: Q62747)

**Known function:** Asynchronous SV release, AMPAR exocytosis during LTP

**Known organization:** Transmembrane protein, Homo- or Heterodimers, On SV, endosomes, lysosomes

**Known Interactions:** Synaptotagmin5, Calmodulin

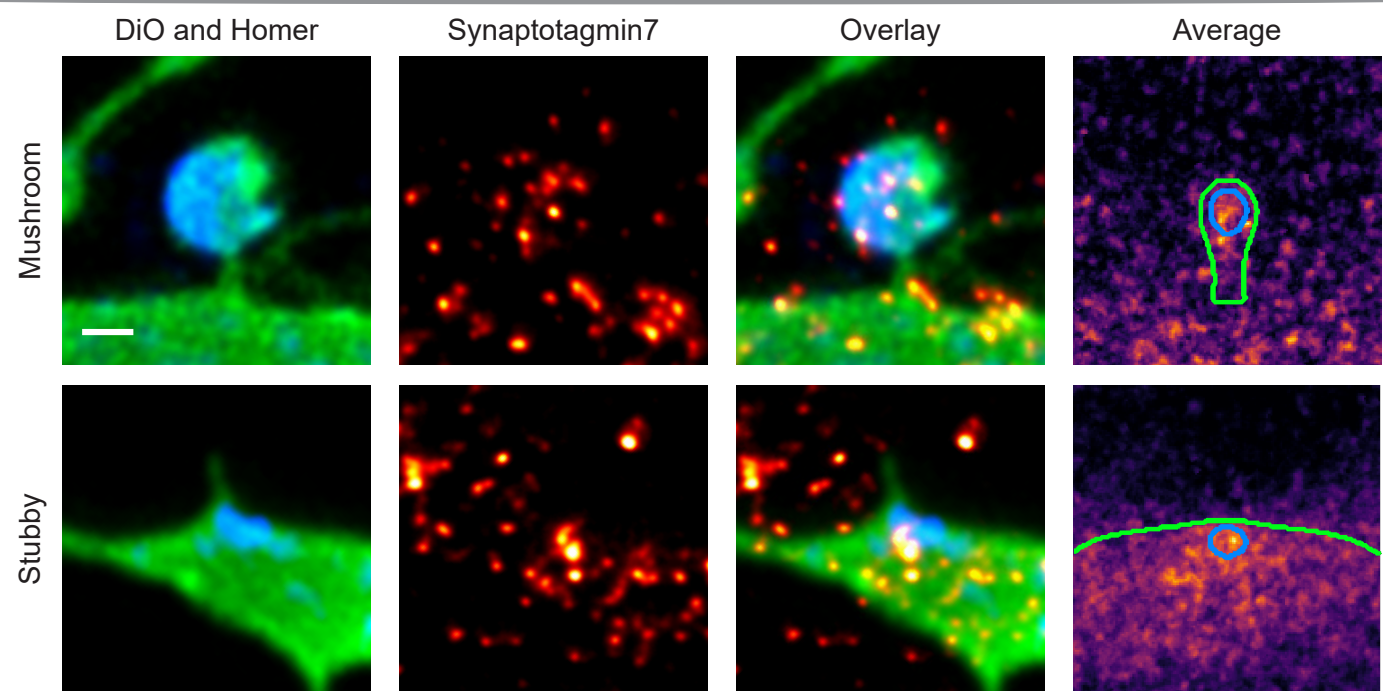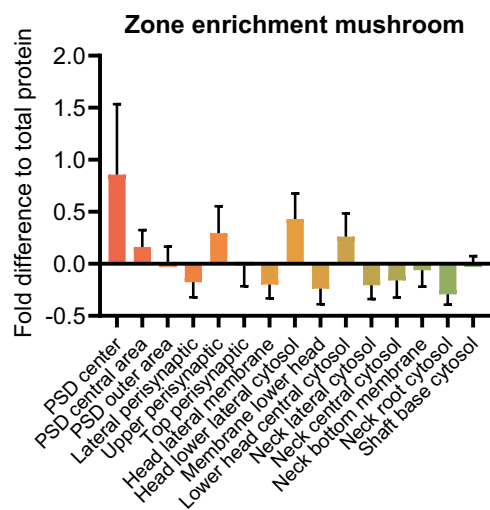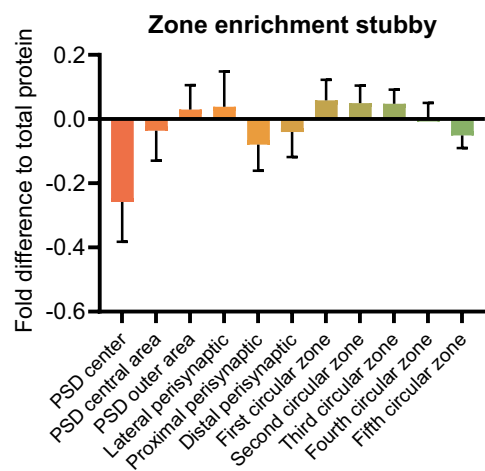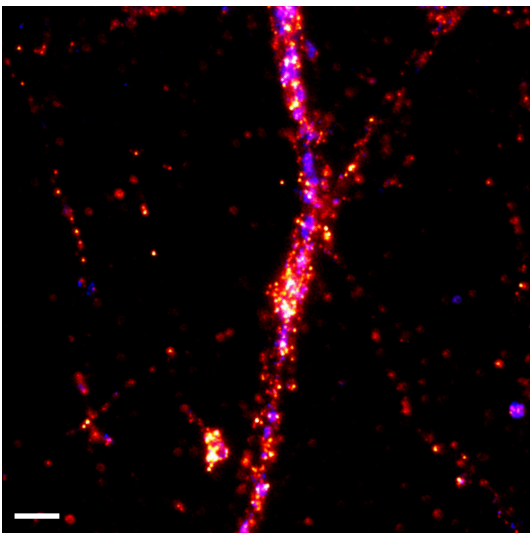

|                        |                            |            |
|------------------------|----------------------------|------------|
| Whole cell copy number | 35042.4 ± 5109.3           |            |
| Spine copy number      | 10.5 ± 2.3                 |            |
| Function               | SNAREs and assoc. proteins |            |
|                        | Mushroom                   | Stubby     |
| Spine copy number      | 7.1 ± 1.5                  | 14.7 ± 3.2 |
| % of total protein     | 0.0 ± 0.0%                 | 0.0 ± 0.0% |
| Molarity (µM)          | 0.1 ± 0.0                  | 0.1 ± 0.0  |
| PSD copy number        | 0 ± 0.0                    | 0 ± 0.0    |
| % in PSD               | 0.0 ± 0.0%                 | 0.0 ± 0.0% |

|          | Spine copy number | % of total protein | Molarity ( $\mu\text{M}$ ) | PSD copy number |
|----------|-------------------|--------------------|----------------------------|-----------------|
| Mushroom | $7.1 \pm 1.5$     | $0.0 \pm 0.0\%$    | $0.1 \pm 0.0$              | $0 \pm 0.0$     |
| Stubby   | $14.7 \pm 3.2$    | $0.0 \pm 0.0\%$    | $0.1 \pm 0.0$              | $0 \pm 0.0$     |

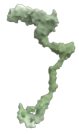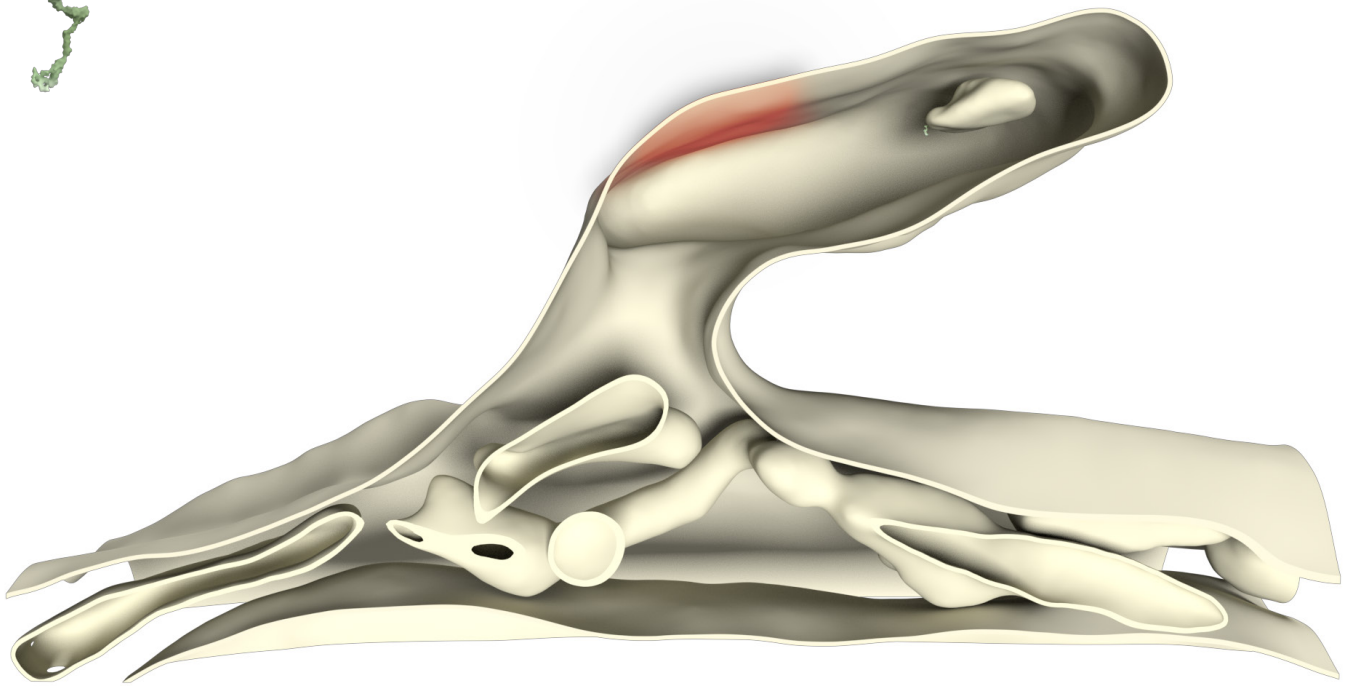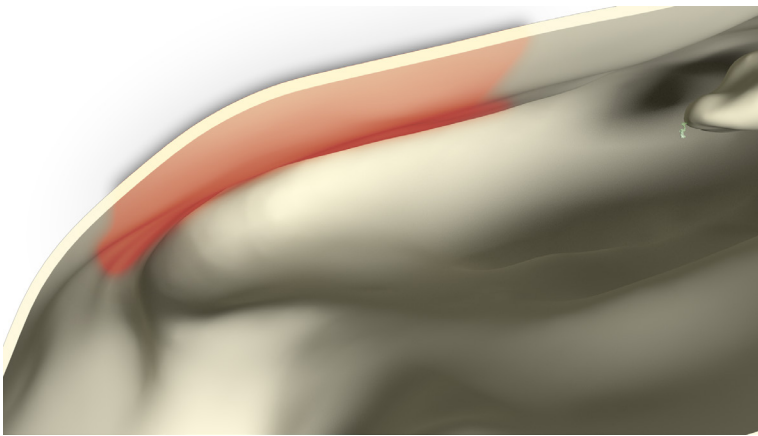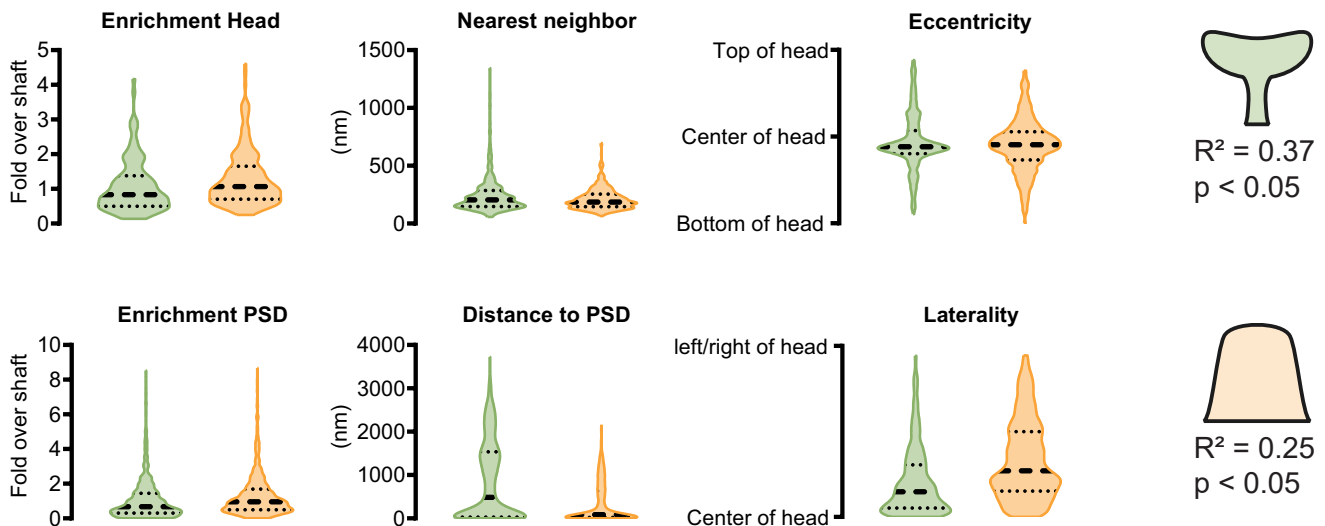

|          | Spine copy number | % of total protein | Molarity ( $\mu\text{M}$ ) | PSD copy number |
|----------|-------------------|--------------------|----------------------------|-----------------|
| Mushroom | $7.1 \pm 1.5$     | $0.0 \pm 0.0\%$    | $0.1 \pm 0.0$              | $0 \pm 0.0$     |
| Stubby   | $14.7 \pm 3.2$    | $0.0 \pm 0.0\%$    | $0.1 \pm 0.0$              | $0 \pm 0.0$     |

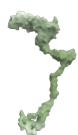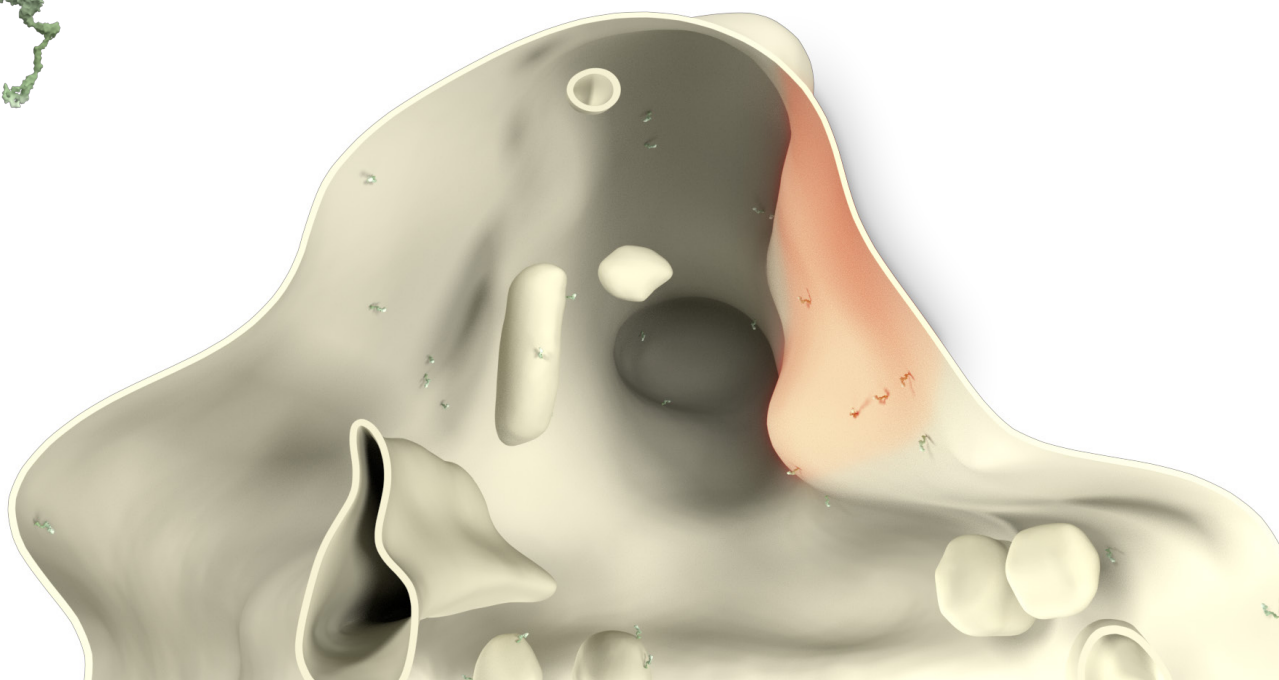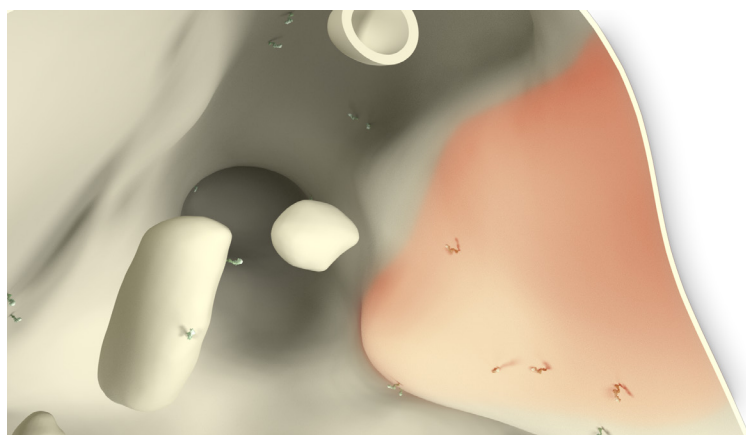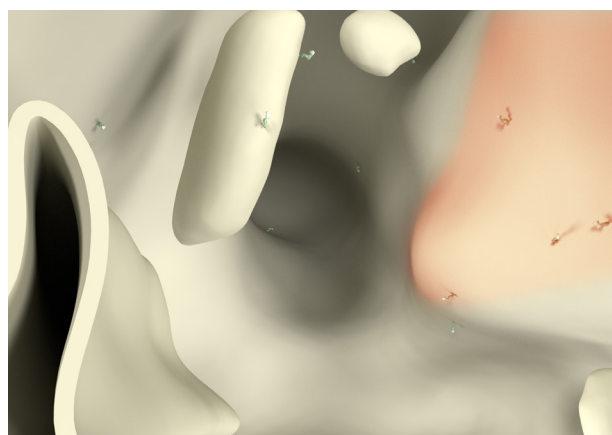

## References

**Antibody:** Synaptic Systems 105 173

**PDB Identifier:** 6ank

### Literature:

Bacaj et al., 2013, Neuron

Bacaj et al., 2015b, PLoS Biol.

Flannery et al., 2010, J. Cell. Biol.

Fukuda and Mikoshiba, 2000, J. Biol. Chem.

Luo et al., 2015, J. Neurosci.

Wen et al., 2010, Proc. Natl. Acad. Sci. U S A

Wu et al., 2017, J. Neurosci.



**SynGAP1 (p135 SynGAP, Gene: Syngap1, Uniprot ID: Q9QUH6)**

**Known function:** RasGAP, Important for plasticity, regulates spine morphology, MAPK and ERK pathways

**Known organization:** In PSD

**Known Interactions:** CaMKII, NMDAR, PSD95

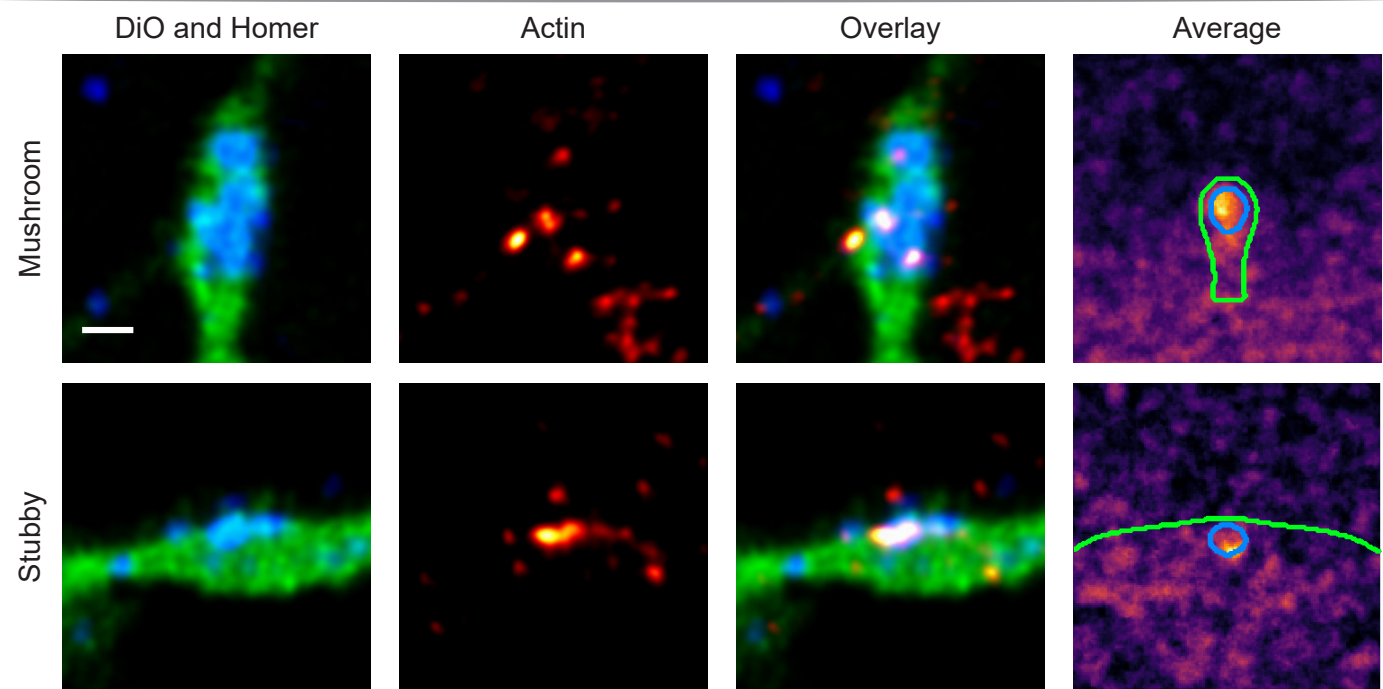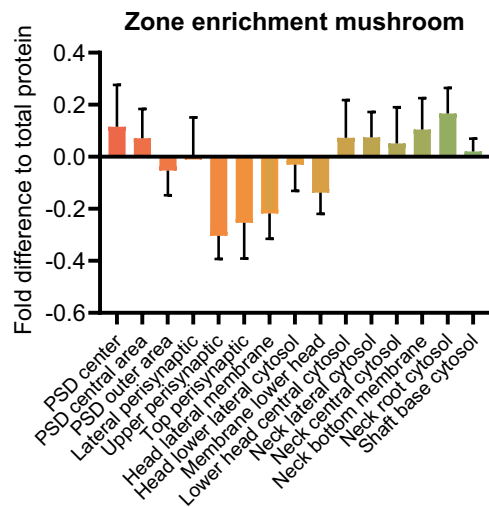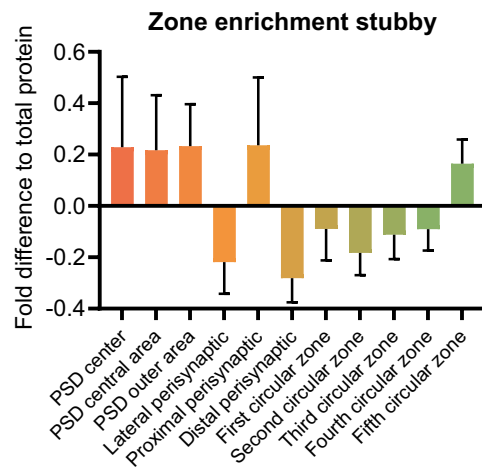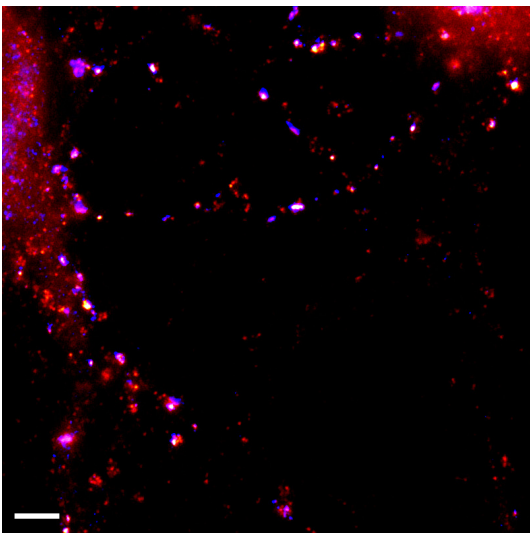

|                        |                    |              |
|------------------------|--------------------|--------------|
| Whole cell copy number | 231547.0 ± 35936.5 |              |
| Spine copy number      | 131.8 ± 25.3       |              |
| Function               | Signaling          |              |
|                        | Mushroom           | Stubby       |
| Spine copy number      | 117.5 ± 22.6       | 131.7 ± 25.3 |
| % of total protein     | 0.1 ± 0.0%         | 0.1 ± 0.0%   |
| Molarity (μM)          | 1.5 ± 0.3          | 1.2 ± 0.2    |
| PSD copy number        | 47 ± 0.9           | 36 ± 6.9     |
| % in PSD               | 40.0 ± 7.7%        | 27.3 ± 5.3%  |

|          | Spine copy number | % of total protein | Molarity ( $\mu\text{M}$ ) | PSD copy number |
|----------|-------------------|--------------------|----------------------------|-----------------|
| Mushroom | $117.5 \pm 22.6$  | $0.1 \pm 0.0\%$    | $1.5 \pm 0.3$              | $47 \pm 0.9$    |
| Stubby   | $131.7 \pm 25.3$  | $0.1 \pm 0.0\%$    | $1.2 \pm 0.2$              | $36 \pm 6.9$    |

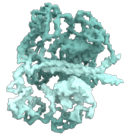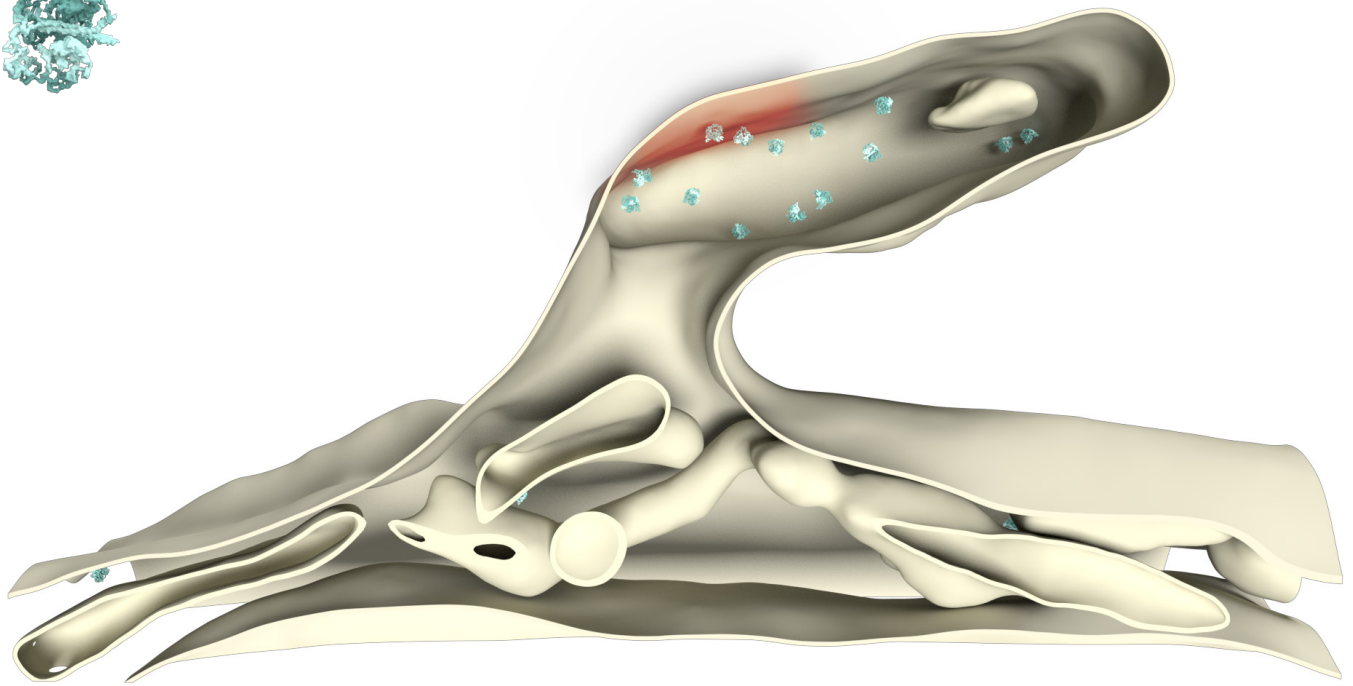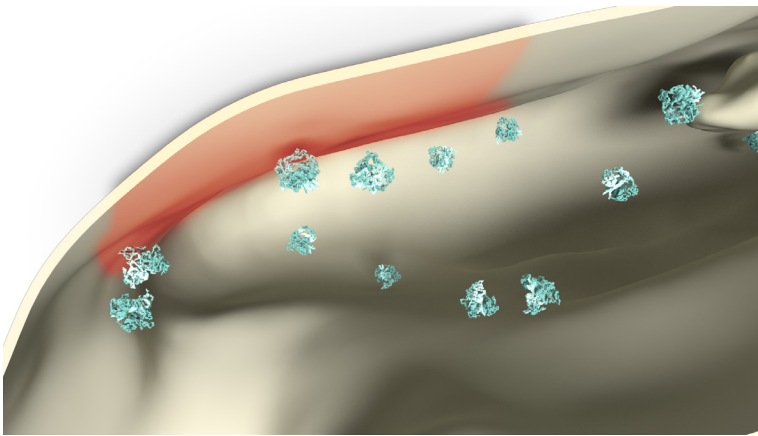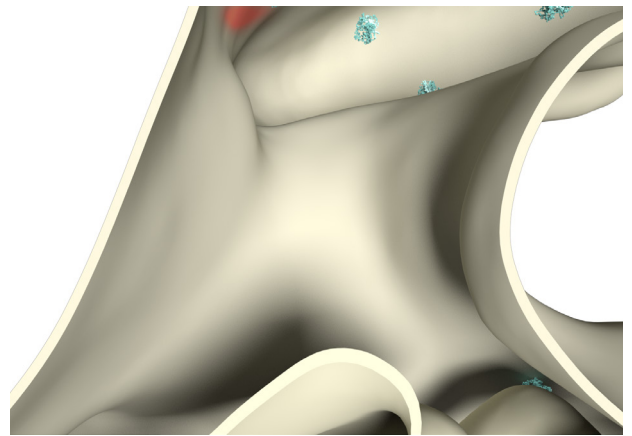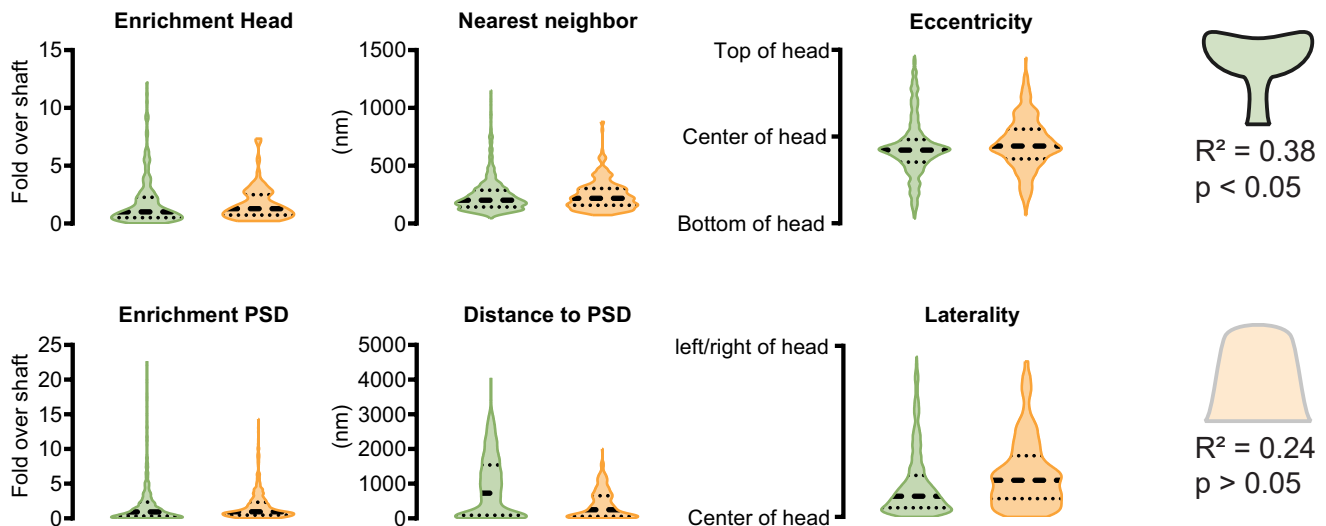

|          | Spine copy number | % of total protein | Molarity ( $\mu\text{M}$ ) | PSD copy number |
|----------|-------------------|--------------------|----------------------------|-----------------|
| Mushroom | $117.5 \pm 22.6$  | $0.1 \pm 0.0\%$    | $1.5 \pm 0.3$              | $47 \pm 0.9$    |
| Stubby   | $131.7 \pm 25.3$  | $0.1 \pm 0.0\%$    | $1.2 \pm 0.2$              | $36 \pm 6.9$    |

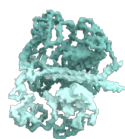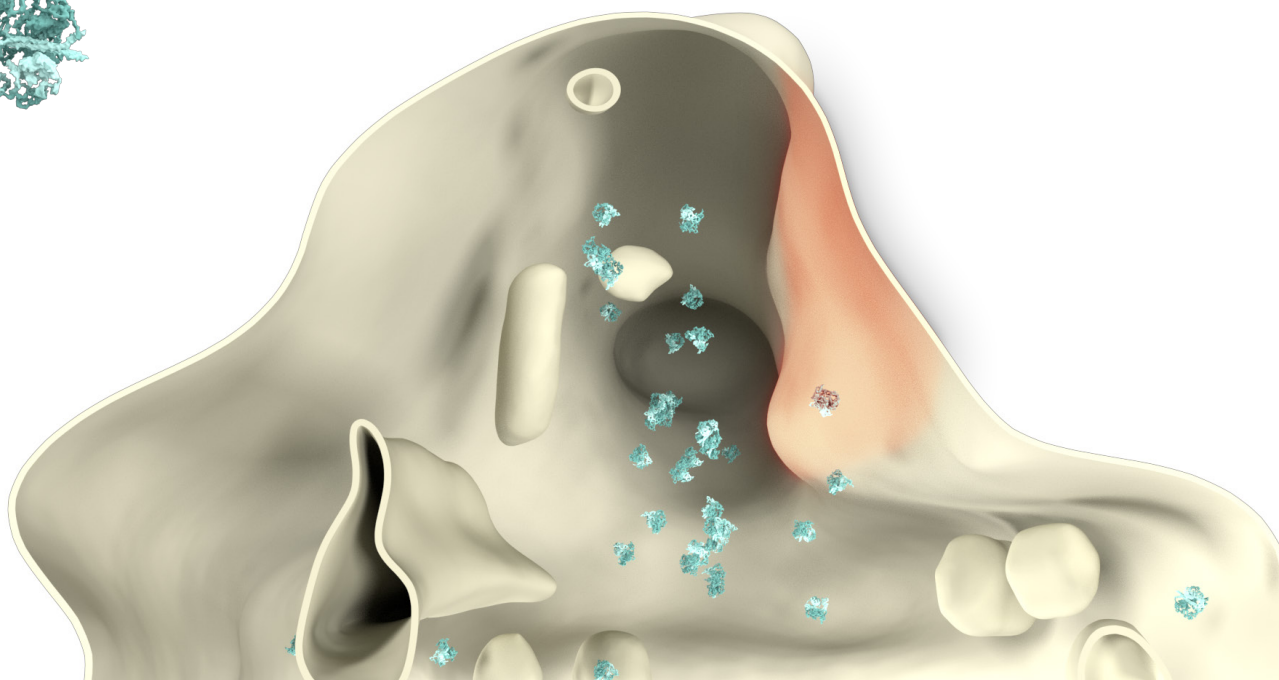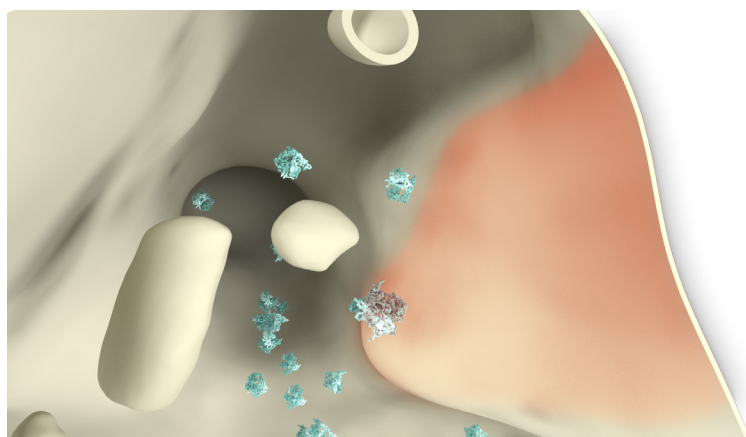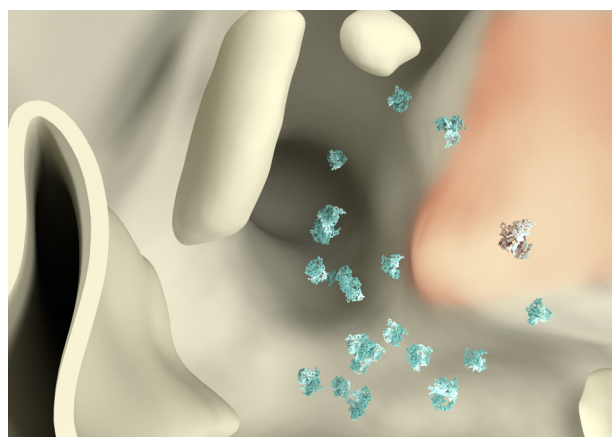

## References

**Antibody:** Thermo Scientific PA1-046

**PDB Identifier:** 5jxb, 5jxc, 3bxj

### Literature:

Chen et al., 1998, Neuron

Clement et al., 2012, Cell

Clement et al., 2013, J. Neurosci.

Grant & O'Dell, 2001, Curr. Opin. Neurobiol.

Grant, 2003, Bioessays

Jeyabalan & Clement, 2016, Front. Cell. Neurosci.

Kim et al., 1998, Neuron

Komiyama et al., 2002, J. Neurosci.

Krapivinsky et al., 2004, Neuron

Pena et al., 2008, EMBO Rep.

Rumbaugh et al., 2006, Proc. Natl. Acad. Sci. U S A



## Syntaxin1a (Gene: Stx1a, Uniprot ID: P32851)

**Known function:** Qa SNARE, SV fusion, Delivery of AMPAR and GABAAR to PM

**Known organization:** Transmembrane protein, On PM, Homooligomeric clusters

**Known Interactions:** VAMP1, VAMP2, SNAP25

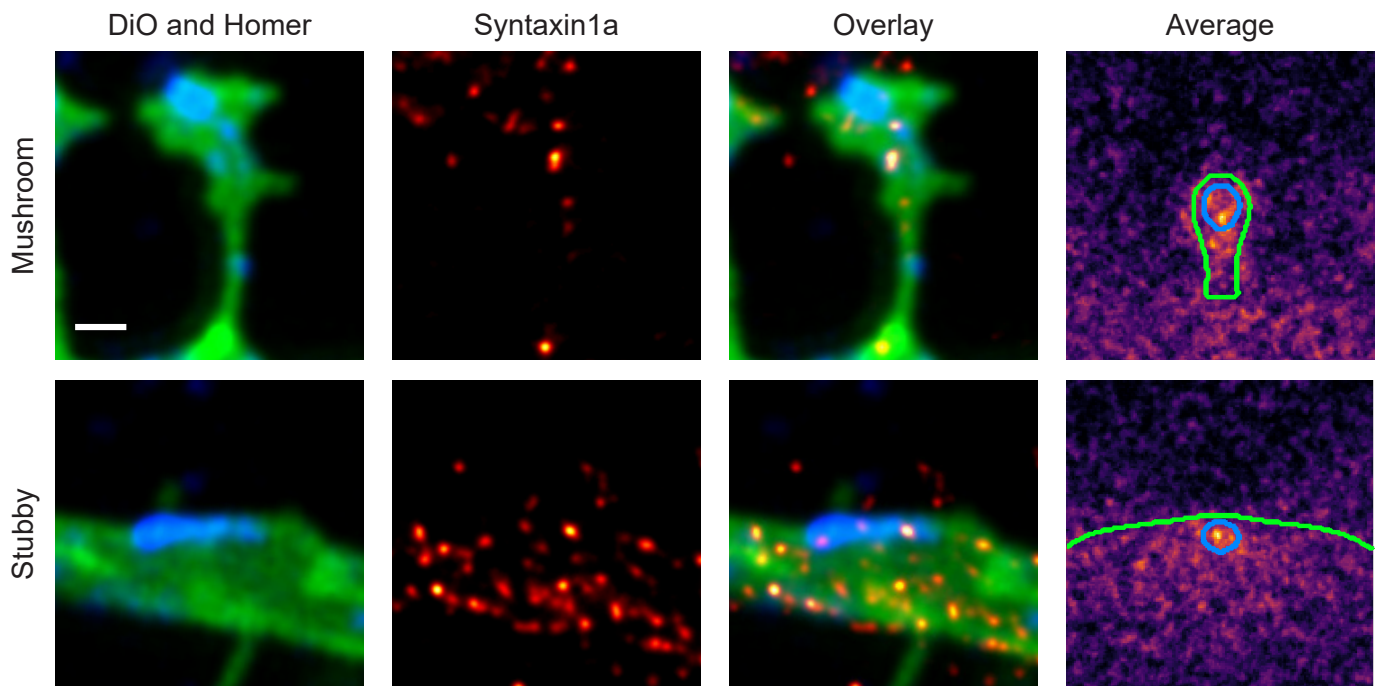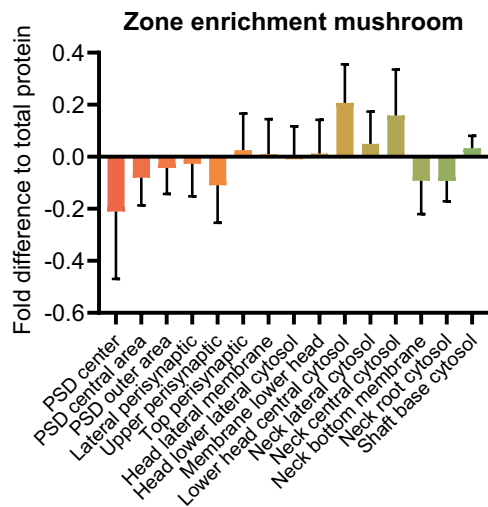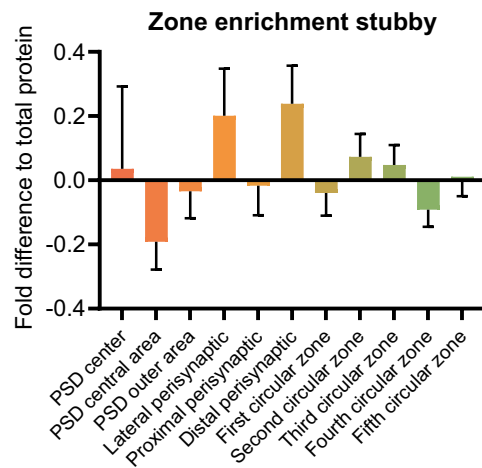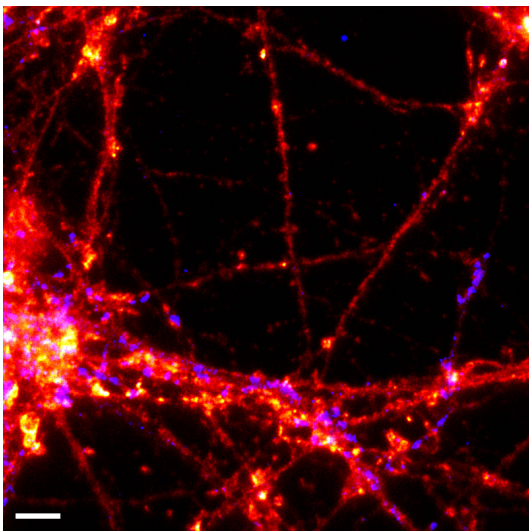

|                        |                            |                |
|------------------------|----------------------------|----------------|
| Whole cell copy number | 16247222.1 ± 2820308.7     |                |
| Spine copy number      | 1806.0 ± 560.8             |                |
| Function               | SNAREs and assoc. proteins |                |
|                        | Mushroom                   | Stubby         |
| Spine copy number      | 1596.2 ± 495.6             | 2149.3 ± 667.3 |
| % of total protein     | 0.3 ± 0.1%                 | 0.3 ± 0.1%     |
| Molarity (μM)          | 20.3 ± 6.3                 | 20.3 ± 6.3     |
| PSD copy number        | 176 ± 54.6                 | 261 ± 81.0     |
| % in PSD               | 11.0 ± 3.4%                | 12.1 ± 3.8%    |

|          | Spine copy number  | % of total protein | Molarity ( $\mu\text{M}$ ) | PSD copy number |
|----------|--------------------|--------------------|----------------------------|-----------------|
| Mushroom | $1596.2 \pm 495.6$ | $0.3 \pm 0.1\%$    | $20.3 \pm 6.3$             | $176 \pm 54.6$  |
| Stubby   | $2149.3 \pm 667.3$ | $0.3 \pm 0.1\%$    | $20.3 \pm 6.3$             | $261 \pm 81.0$  |

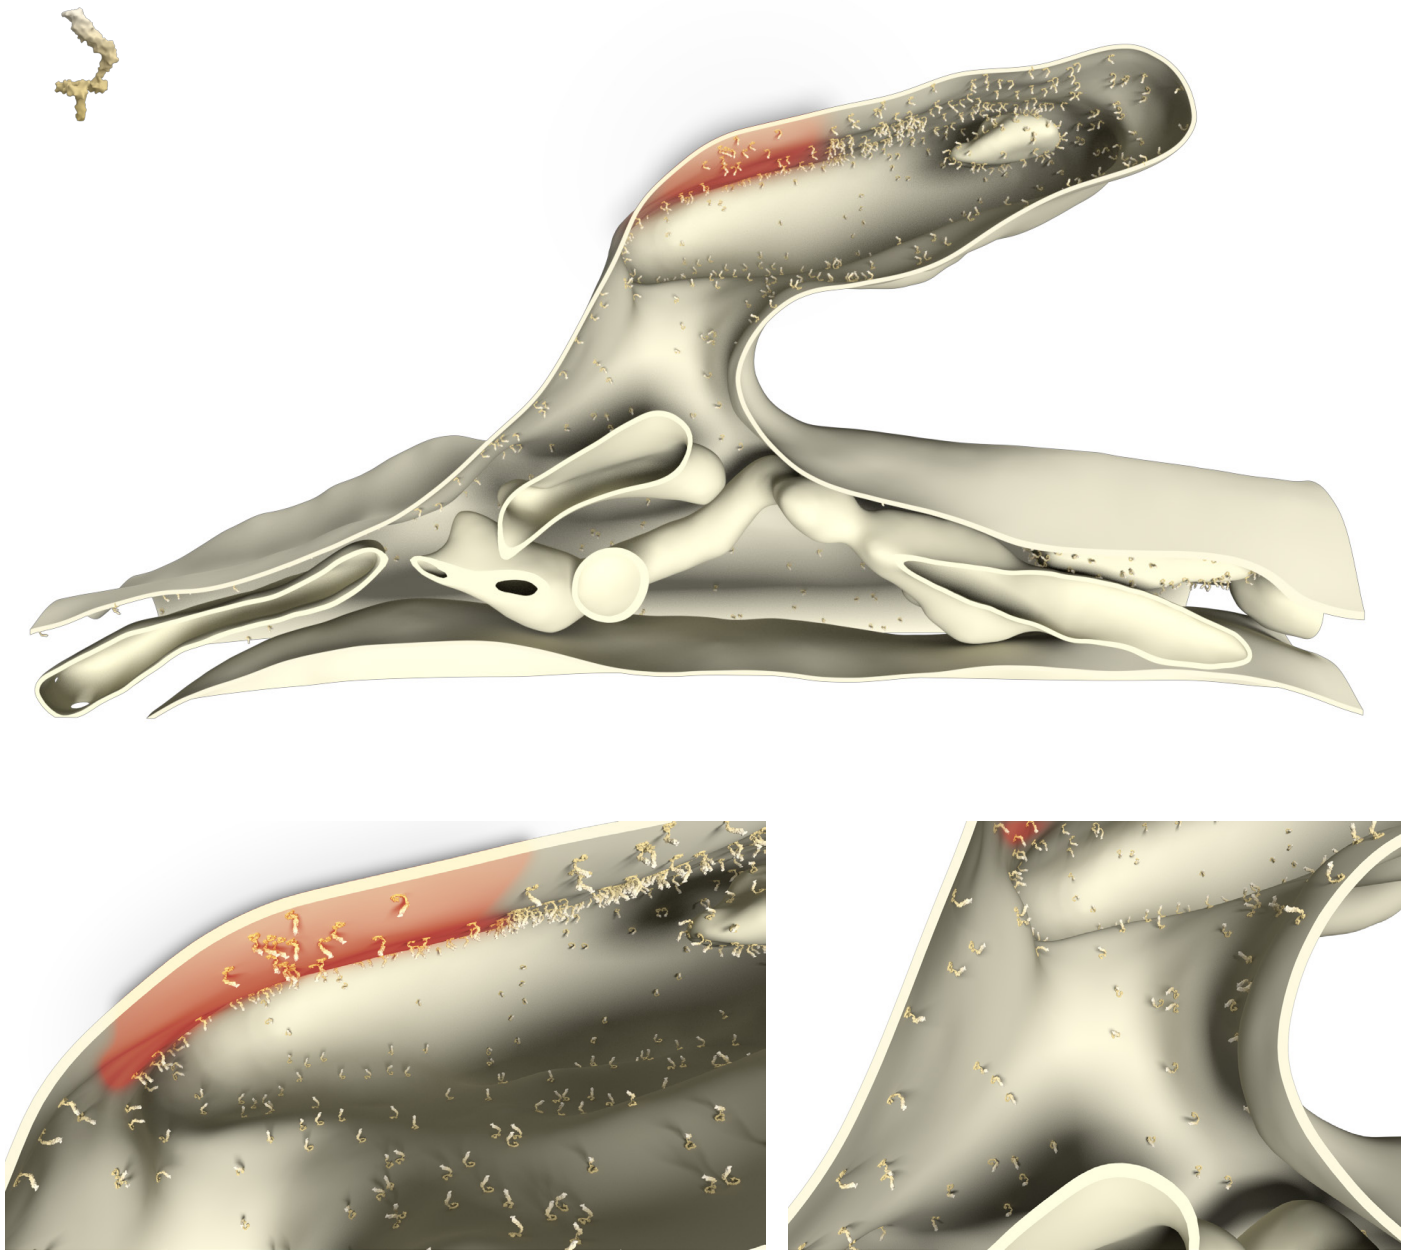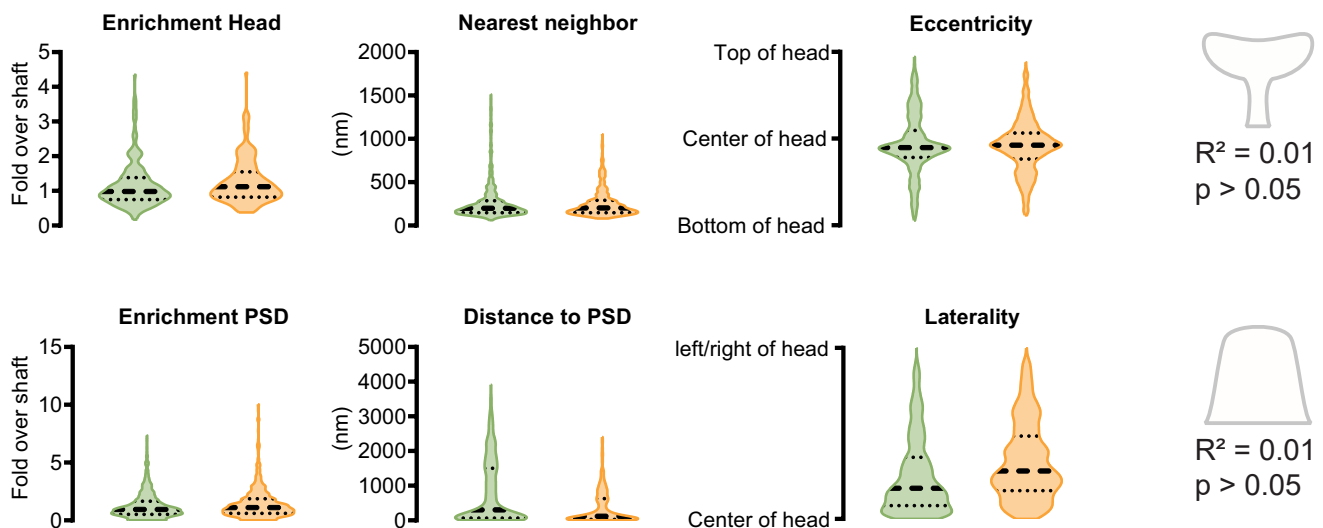

|          | Spine copy number  | % of total protein | Molarity ( $\mu\text{M}$ ) | PSD copy number |
|----------|--------------------|--------------------|----------------------------|-----------------|
| Mushroom | $1596.2 \pm 495.6$ | $0.3 \pm 0.1\%$    | $20.3 \pm 6.3$             | $176 \pm 54.6$  |
| Stubby   | $2149.3 \pm 667.3$ | $0.3 \pm 0.1\%$    | $20.3 \pm 6.3$             | $261 \pm 81.0$  |

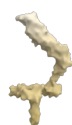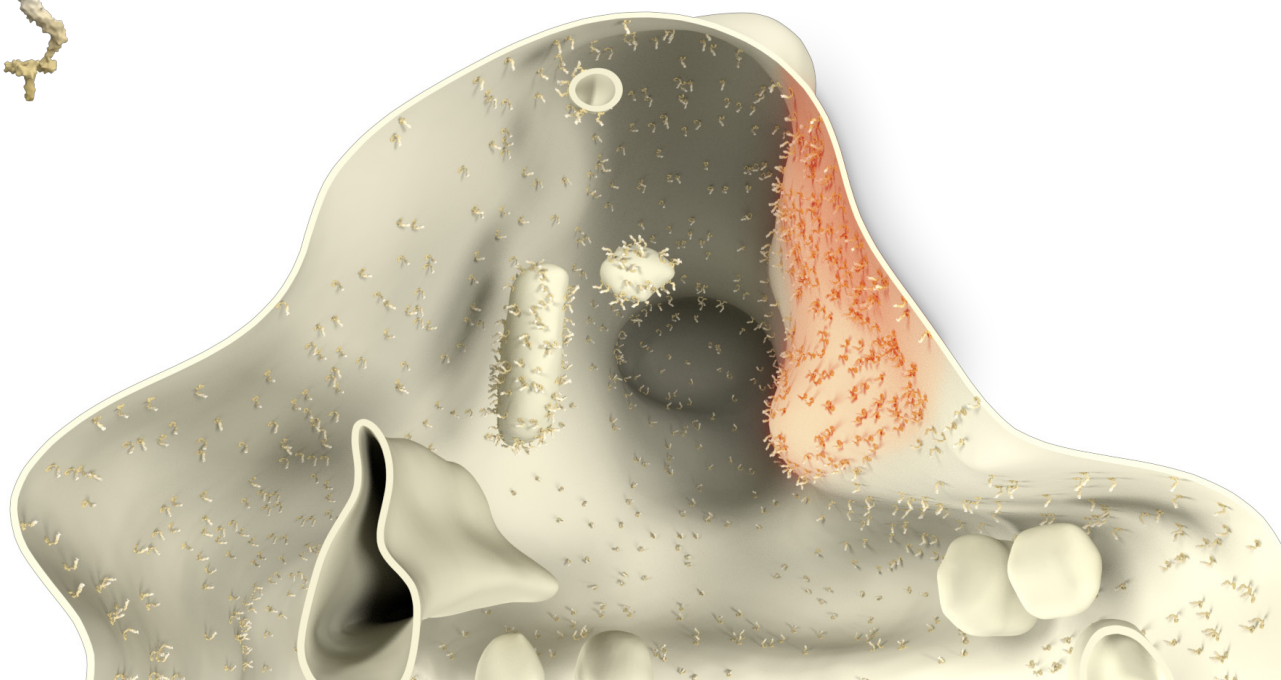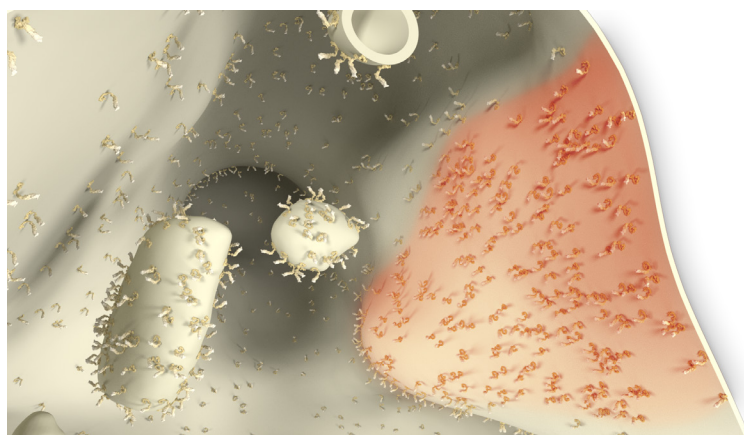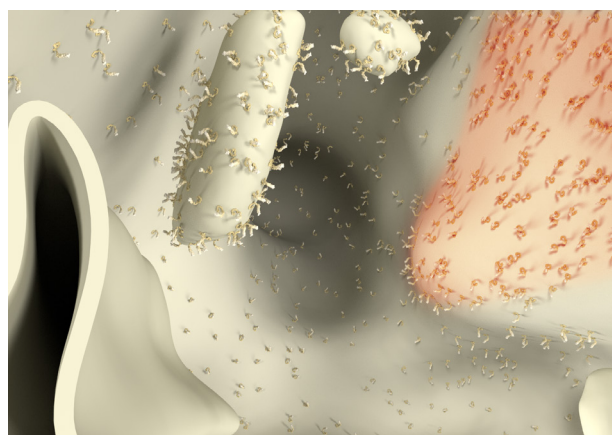

## References

**Antibody:** Synaptic Systems 110 011

**PDB Identifier:** 2m8r, 1bro

### Literature:

Calakos et al., 1994, Science

Hussain et al., 2016, Front. Mol. Neurosci.

Lang et al., 2002, J. Cell. Biol.

Maidorn, 2019, Mabs

Oyler et al., 1989, J. Cell. Biol.

Sieber et al., 2006, Biophys. J.

Sieber et al., 2007, Science

Trimble et al., 1988, Proc. Natl. Acad. Sci. U S A



## Syntaxin2 (Epimorphin, Gene: Stx2, Uniprot ID: P50279)

**Known function:** Qa SNARE, Endosome-Recycling Endosome fusion, LDCV release

**Known organization:** Transmembrane protein, On PM

**Known Interactions:** VAMP1, VAMP2, VAMP7, SNAP23

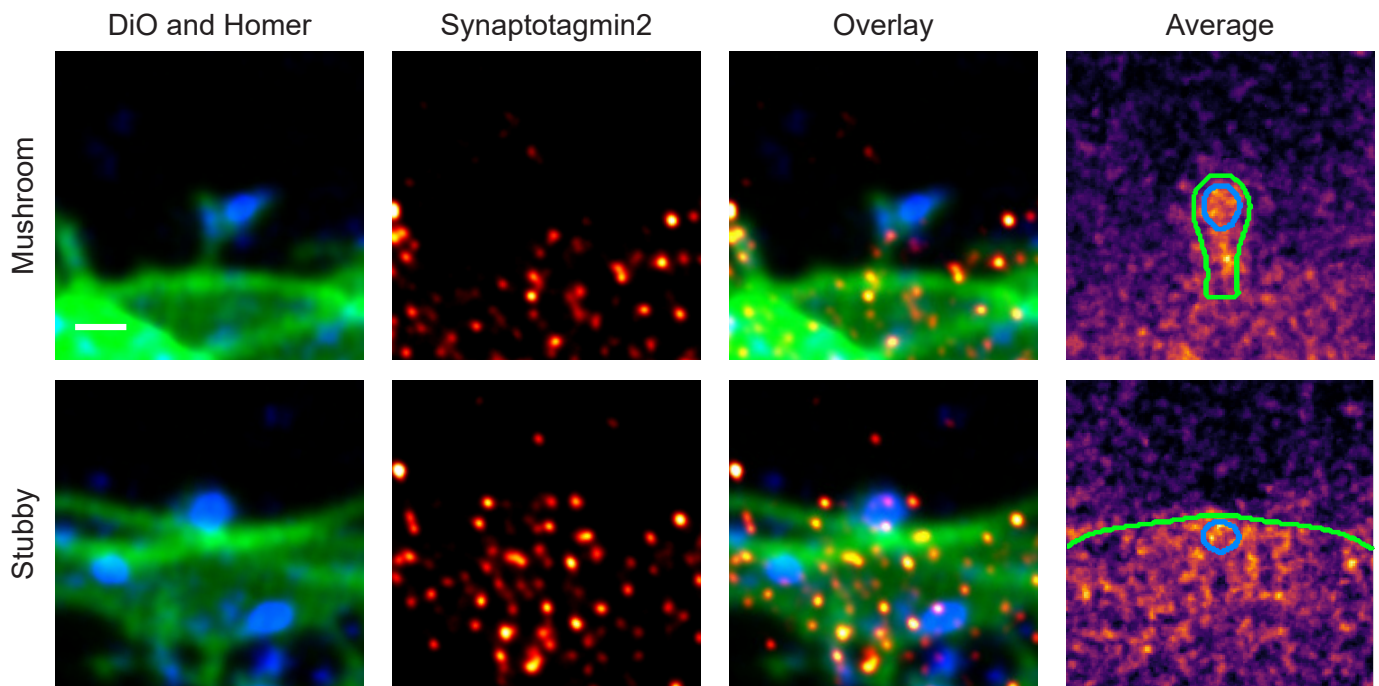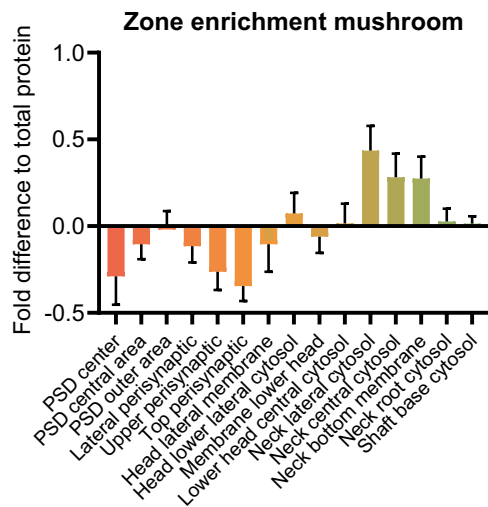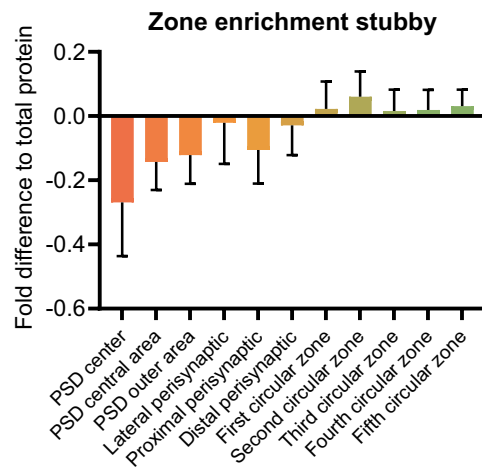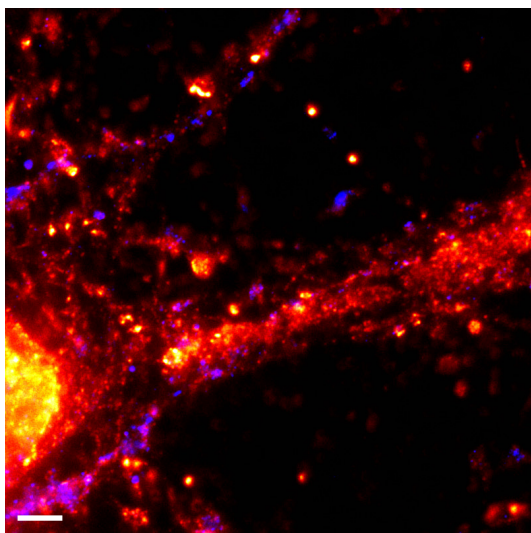

|                        |                            |                |
|------------------------|----------------------------|----------------|
| Whole cell copy number | 3413950.0 ± 588226.1       |                |
| Spine copy number      | 913.5 ± 205.8              |                |
| Function               | SNAREs and assoc. proteins |                |
|                        | Mushroom                   | Stubby         |
| Spine copy number      | 825.5 ± 186.0              | 1114.5 ± 251.1 |
| % of total protein     | 0.1 ± 0.0%                 | 0.2 ± 0.0%     |
| Molarity (μM)          | 10.5 ± 2.4                 | 10.5 ± 2.4     |
| PSD copy number        | 155 ± 34.9                 | 108 ± 24.3     |
| % in PSD               | 18.8 ± 4.2%                | 9.7 ± 2.2%     |

|          | Spine copy number  | % of total protein | Molarity ( $\mu\text{M}$ ) | PSD copy number |
|----------|--------------------|--------------------|----------------------------|-----------------|
| Mushroom | $825.5 \pm 186.0$  | $0.1 \pm 0.0\%$    | $10.5 \pm 2.4$             | $155 \pm 34.9$  |
| Stubby   | $1114.5 \pm 251.1$ | $0.2 \pm 0.0\%$    | $10.5 \pm 2.4$             | $108 \pm 24.3$  |

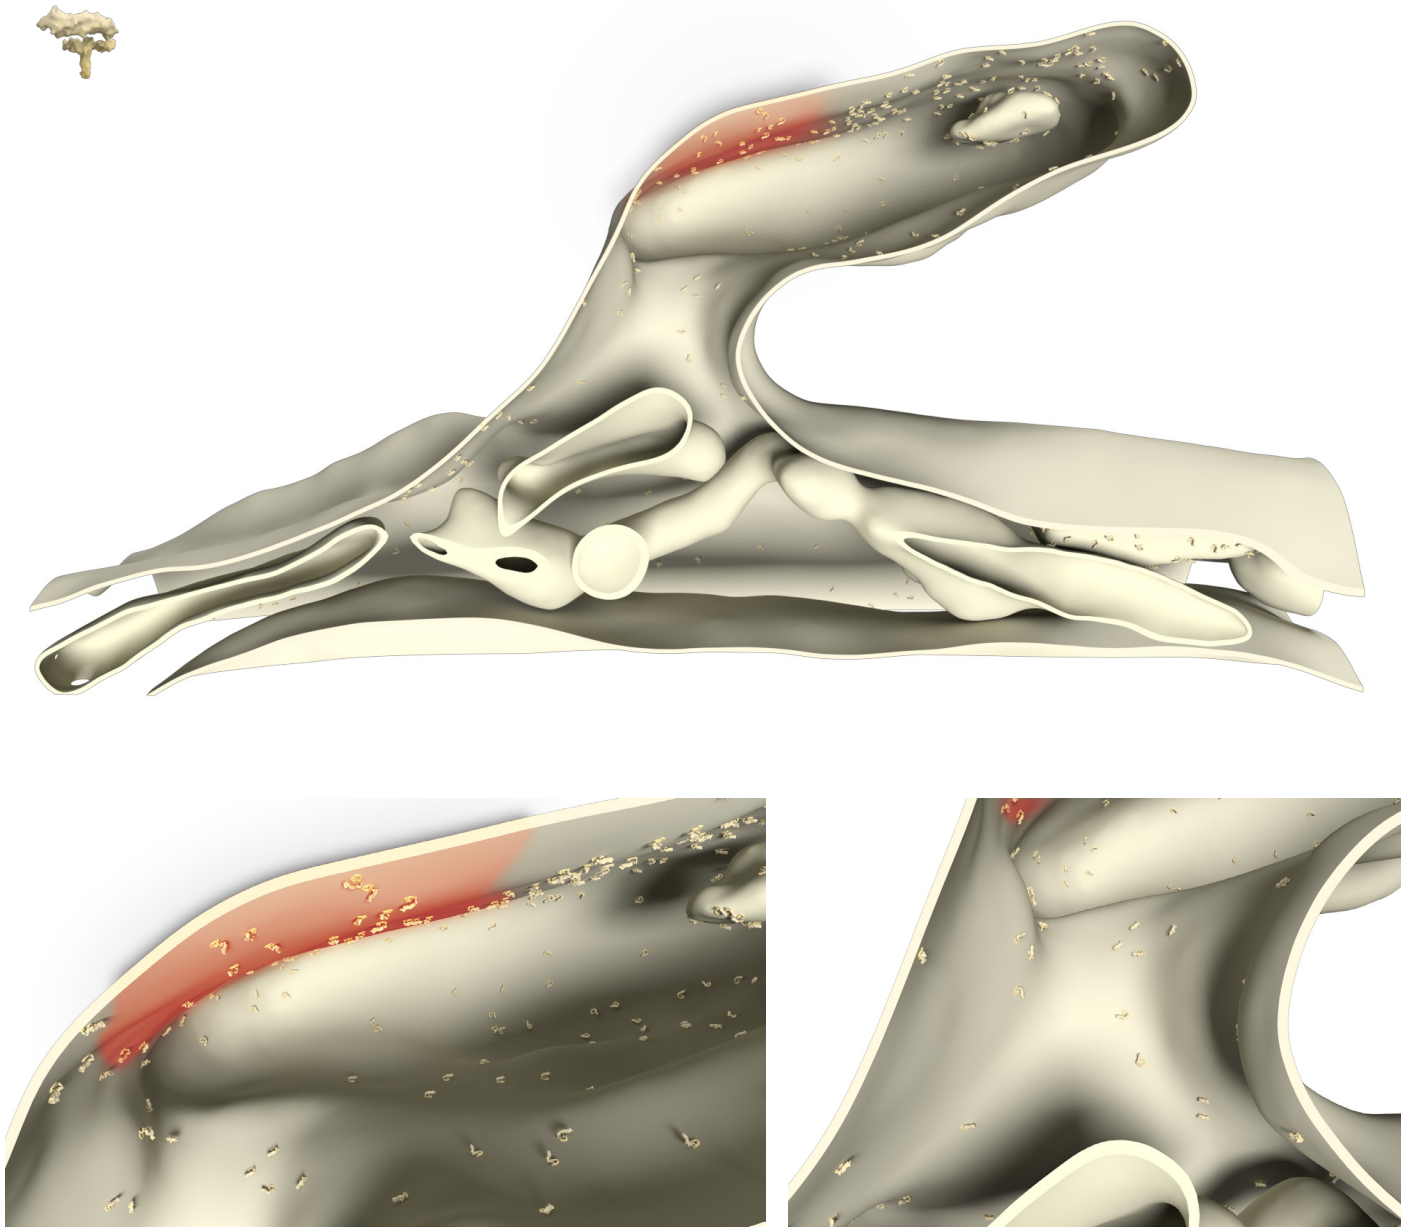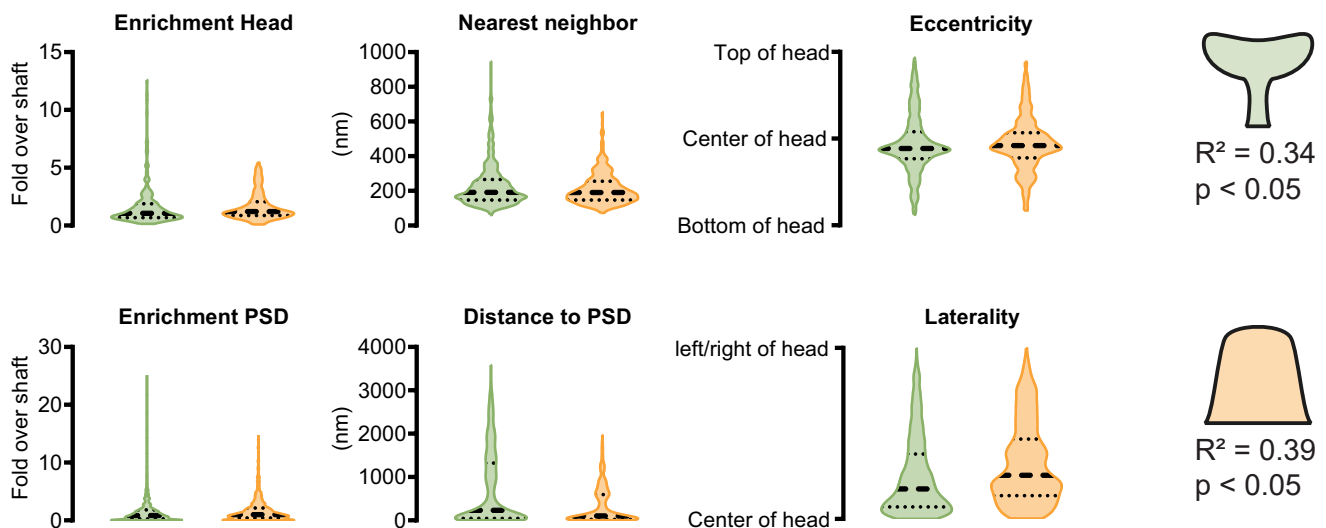

|          | Spine copy number  | % of total protein | Molarity ( $\mu\text{M}$ ) | PSD copy number |
|----------|--------------------|--------------------|----------------------------|-----------------|
| Mushroom | $825.5 \pm 186.0$  | $0.1 \pm 0.0\%$    | $10.5 \pm 2.4$             | $155 \pm 34.9$  |
| Stubby   | $1114.5 \pm 251.1$ | $0.2 \pm 0.0\%$    | $10.5 \pm 2.4$             | $108 \pm 24.3$  |

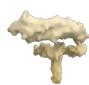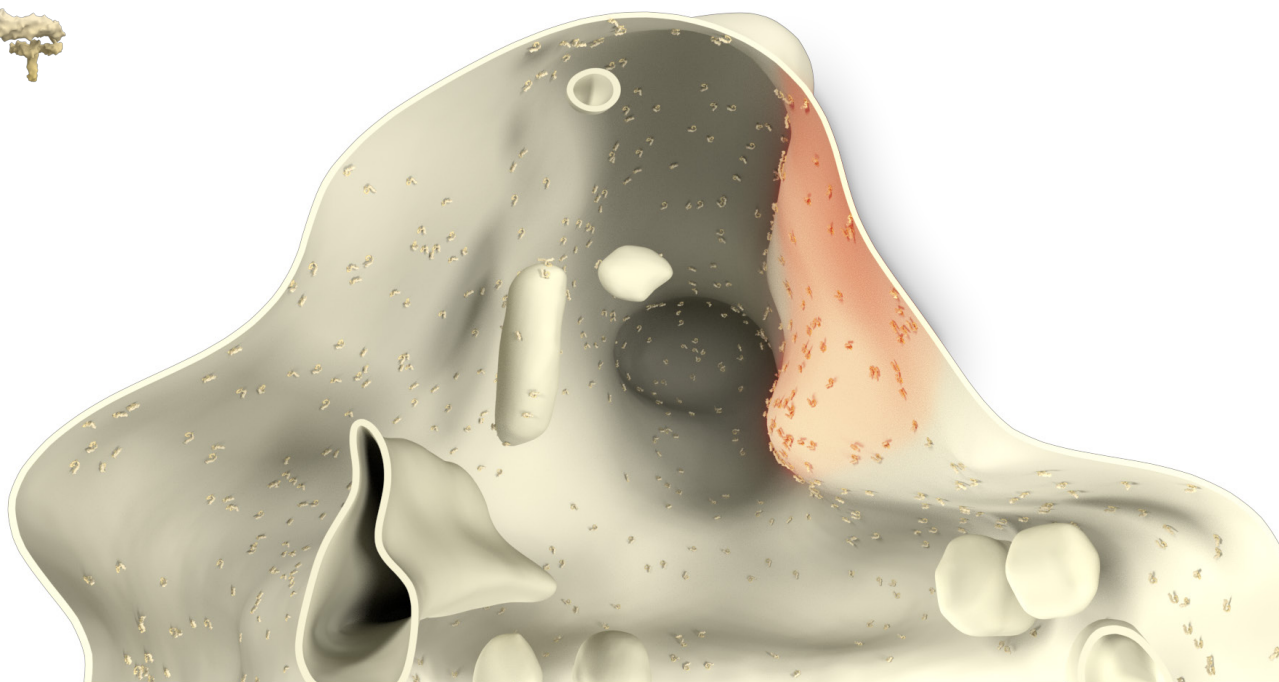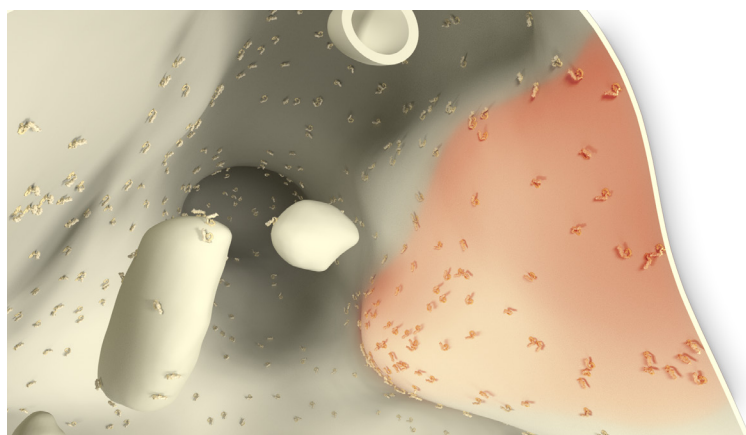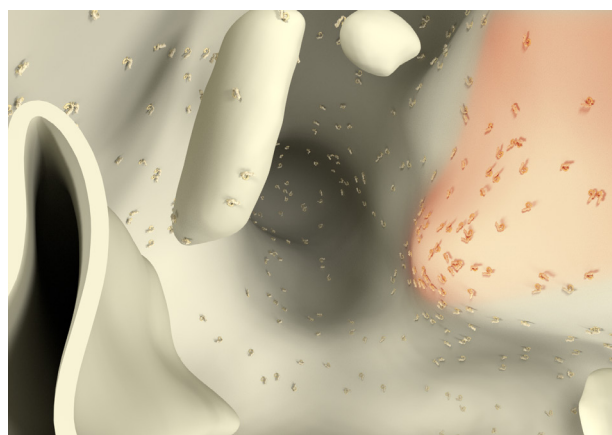

## References

**Antibody:** Synaptic Systems 110 022

**PDB Identifier:** modified Syntaxin1

### Literature:

Calakos et al., 1994, Science

Chen et al., 2000, Blood

Kennedy et al., 2010, Cell



## Syntaxin3 (Gene: Stx3, Uniprot ID: Q08849)

**Known function:** Qa SNARE, Delivery of AMPAR during LTP

**Known organization:** Transmembrane protein, On PM

**Known Interactions:** SNAP47, VAMP2

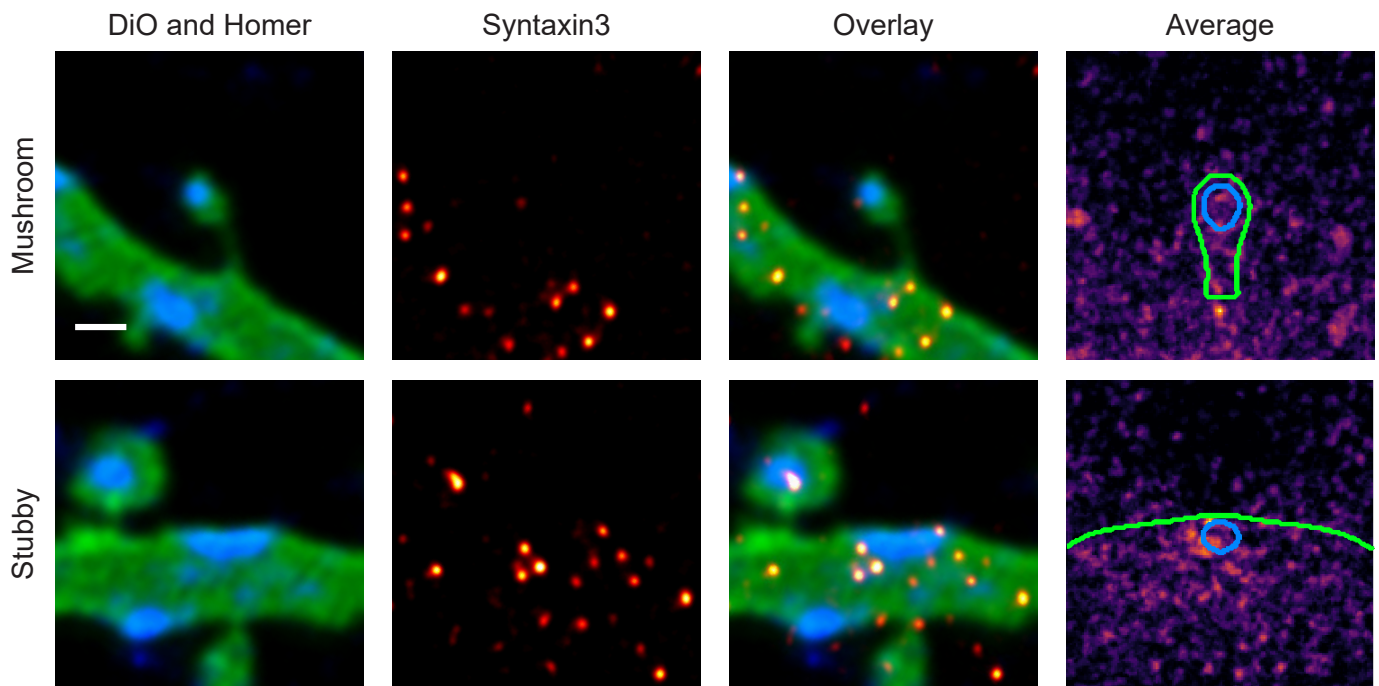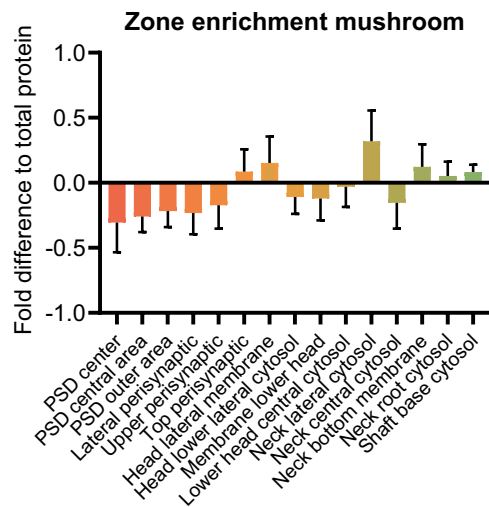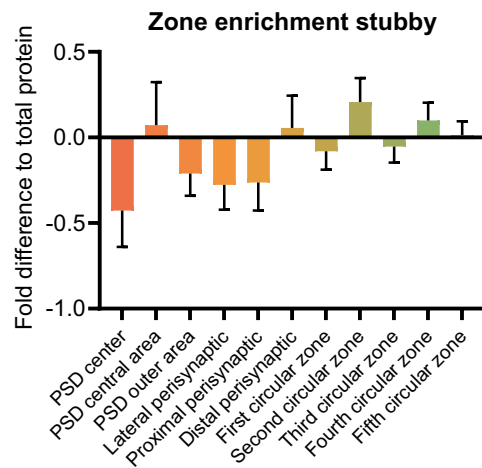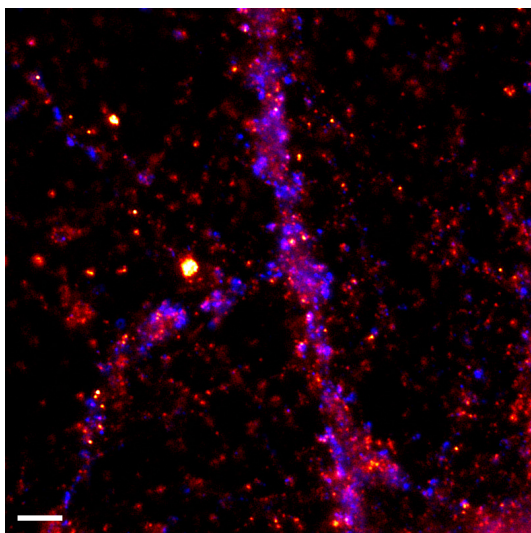

|                        |                                               |            |
|------------------------|-----------------------------------------------|------------|
| Whole cell copy number | 81279.9 ± 0<br>(only detected in 1 replicate) |            |
| Spine copy number      | 13.9 ± 2.5                                    |            |
| Function               | SNAREs and assoc. proteins                    |            |
|                        | Mushroom                                      | Stubby     |
| Spine copy number      | 12.4 ± 2.2                                    | 18 ± 3.3   |
| % of total protein     | 0.0 ± 0.0%                                    | 0.0 ± 0.0% |
| Molarity (μM)          | 0.2 ± 0.0                                     | 0.2 ± 0.0  |
| PSD copy number        | 1 ± 0.0                                       | 1 ± 0.0    |
| % in PSD               | 8.1 ± 0.0%                                    | 5.6 ± 0.0% |

|          | Spine copy number | % of total protein | Molarity ( $\mu\text{M}$ ) | PSD copy number |
|----------|-------------------|--------------------|----------------------------|-----------------|
| Mushroom | $12.4 \pm 2.2$    | $0.0 \pm 0.0\%$    | $0.2 \pm 0.0$              | $1 \pm 0.0$     |
| Stubby   | $18 \pm 3.3$      | $0.0 \pm 0.0\%$    | $0.2 \pm 0.0$              | $1 \pm 0.0$     |

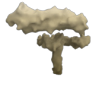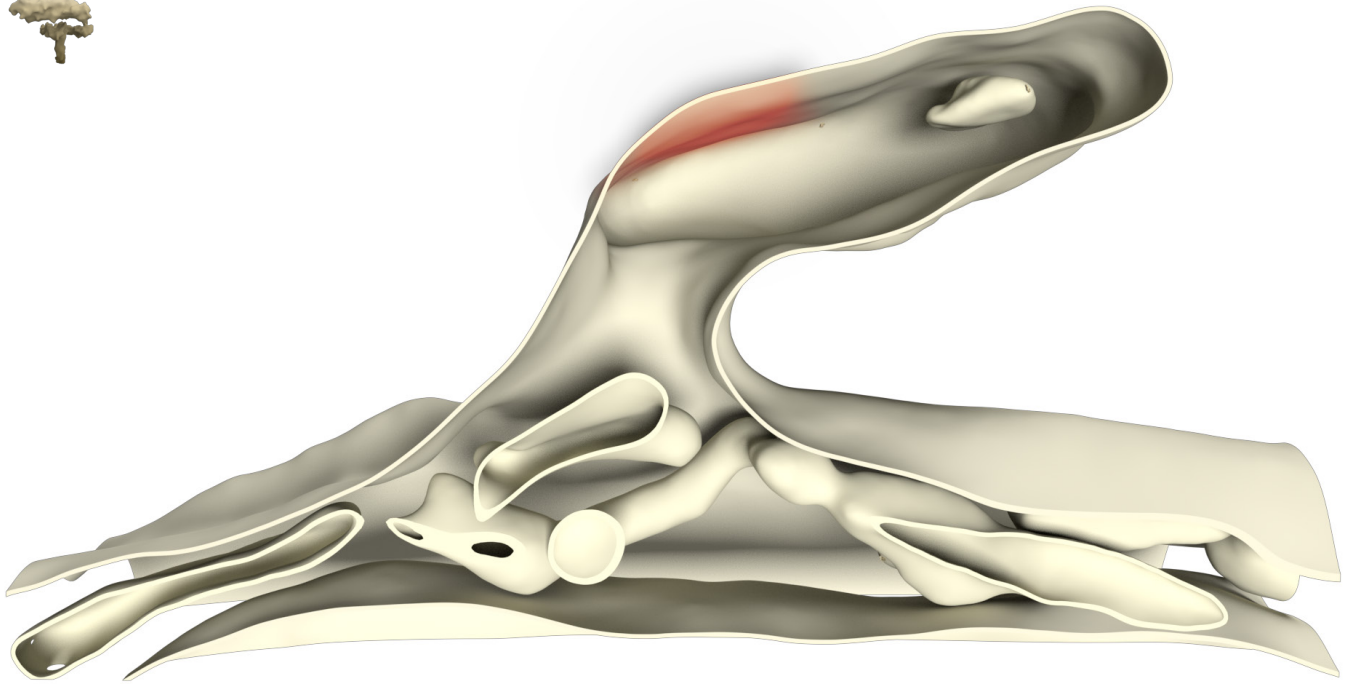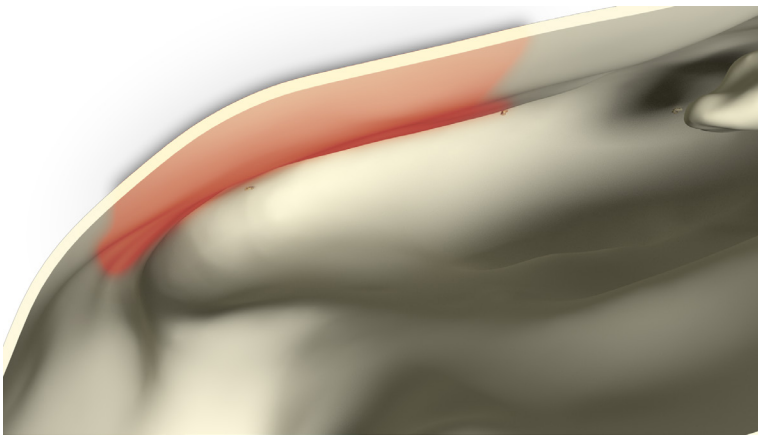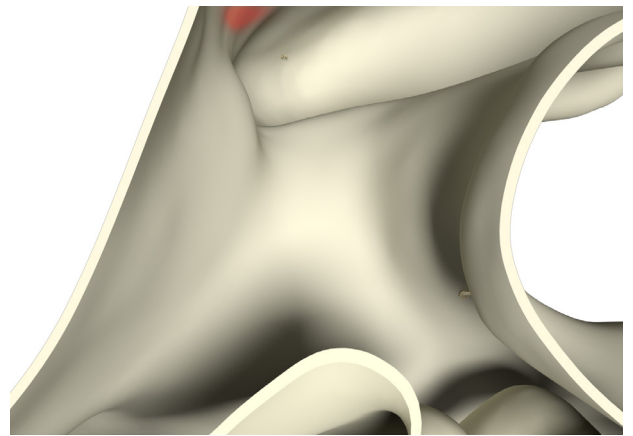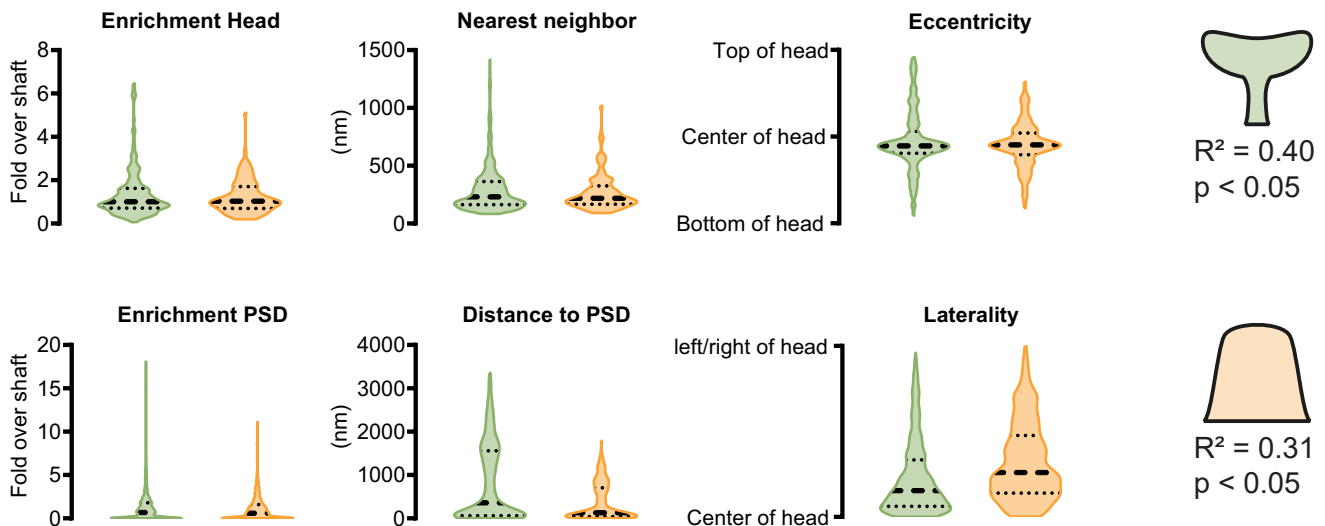

|          | Spine copy number | % of total protein | Molarity ( $\mu\text{M}$ ) | PSD copy number |
|----------|-------------------|--------------------|----------------------------|-----------------|
| Mushroom | $12.4 \pm 2.2$    | $0.0 \pm 0.0\%$    | $0.2 \pm 0.0$              | $1 \pm 0.0$     |
| Stubby   | $18 \pm 3.3$      | $0.0 \pm 0.0\%$    | $0.2 \pm 0.0$              | $1 \pm 0.0$     |

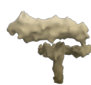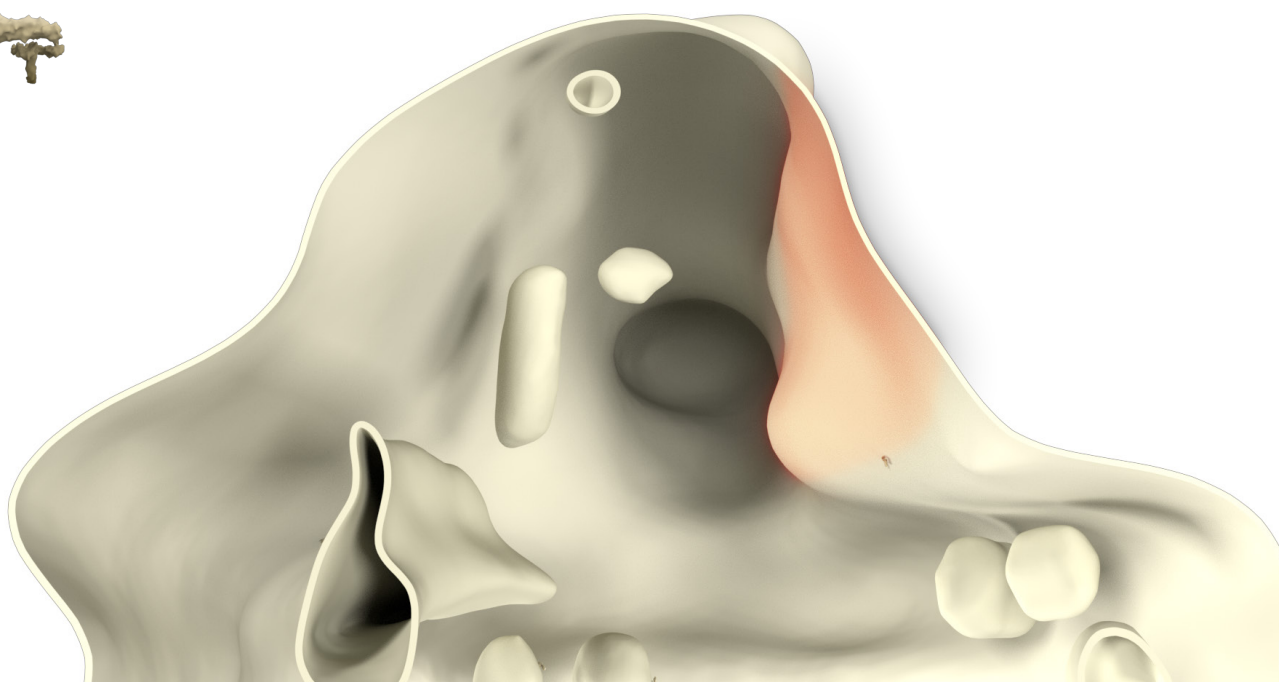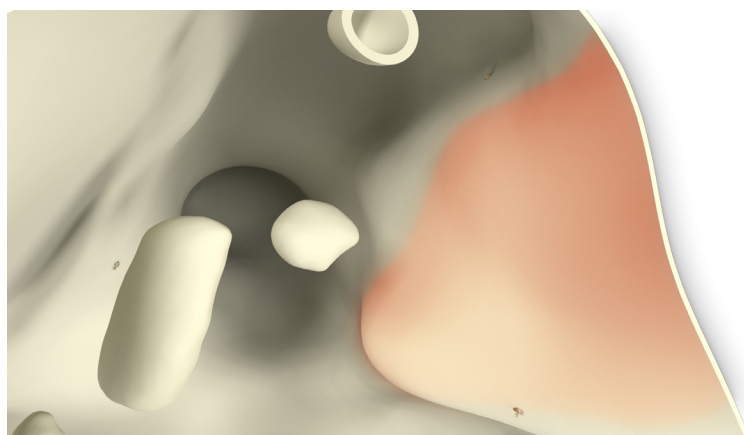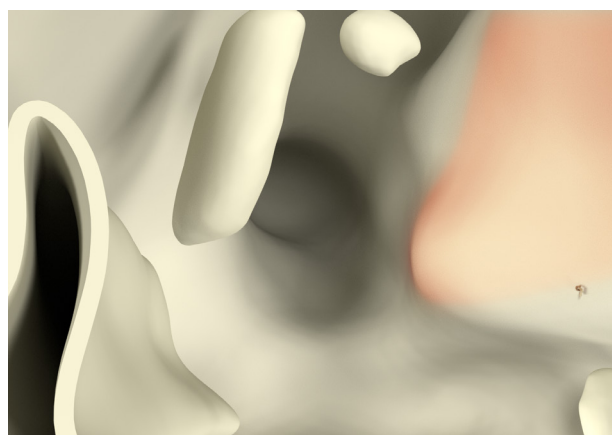

## References

**Antibody:** Synaptic Systems 110 033

**PDB Identifier:** modified Syntaxin1

### Literature:

Arendt et al., 2015, Proc. Natl. Acad. Sci. U S A

Jurado et al., 2013, Neuron



## Syntaxin4 (Gene: Stx4, Uniprot ID: Q08850)

**Known function:** Qa SNARE, Delivery of AMPAR, NMDAR and Nlg1 to PM, Involved in Homeostatic plasticity, Retrograde signaling, Caveolea fusion

**Known organization:** Transmembrane protein, Homooligomeric clusters, Lateral spine head

**Known Interactions:** VAMP1, VAMP2, SNAP23, SNAP47

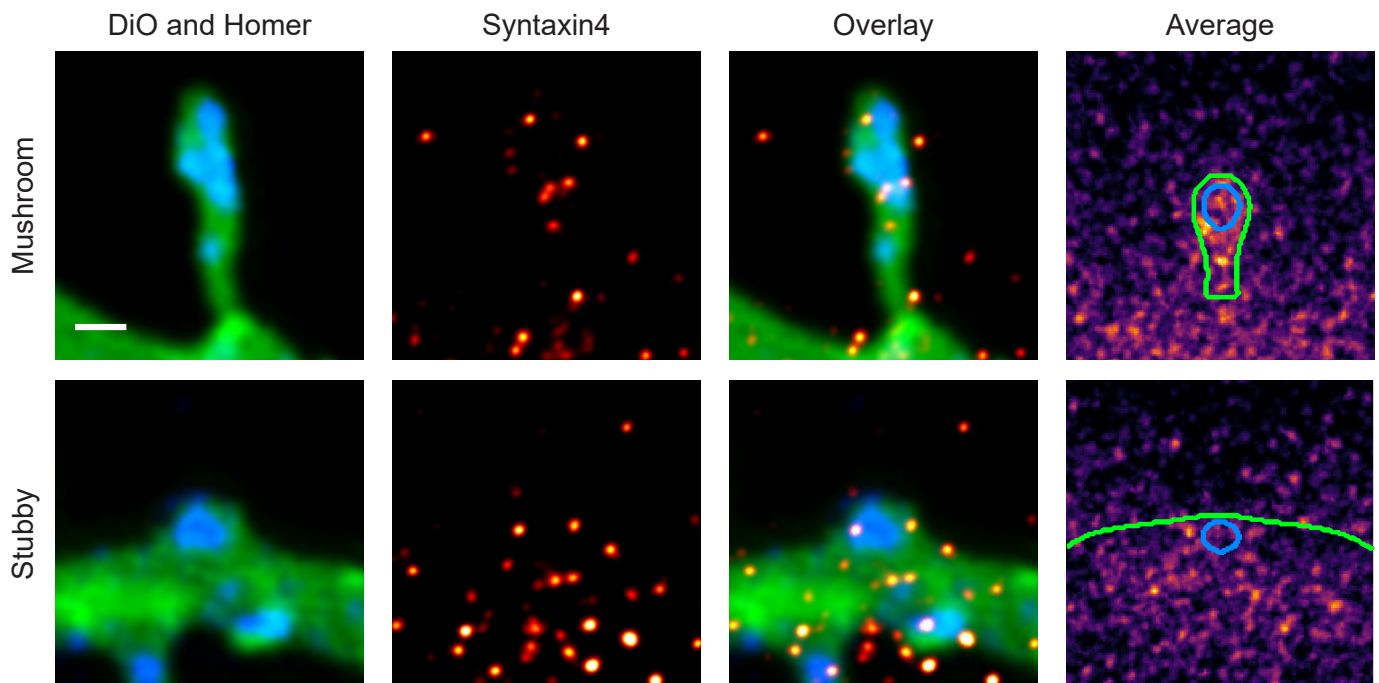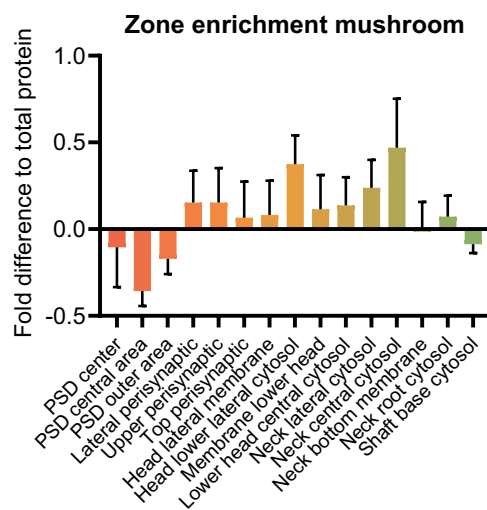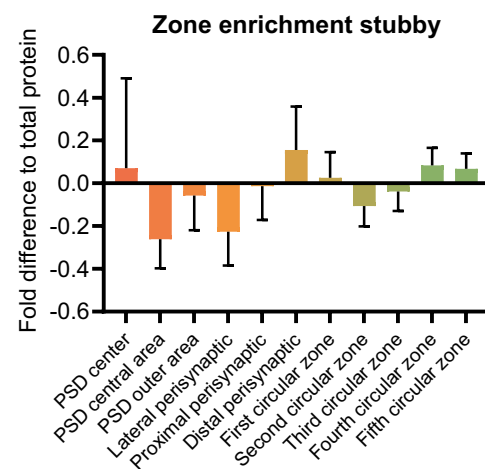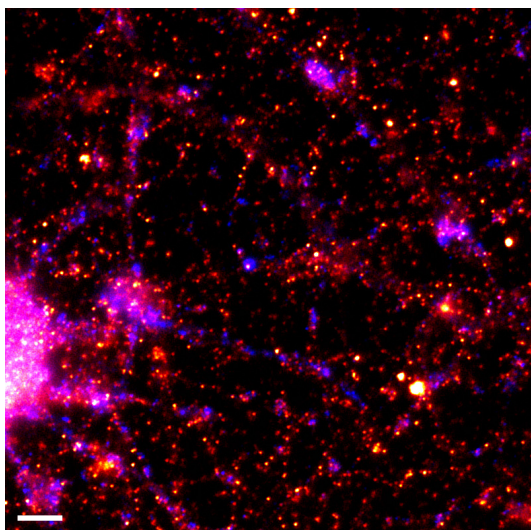

|                        |                                               |            |
|------------------------|-----------------------------------------------|------------|
| Whole cell copy number | 35244.9 ± 0<br>(only detected in 1 replicate) |            |
| Spine copy number      | 7.1                                           |            |
| Function               | SNAREs and assoc. proteins                    |            |
|                        | Mushroom                                      | Stubby     |
| Spine copy number      | 7.4 ± 1.3                                     | 7.6 ± 1.3  |
| % of total protein     | 0.0 ± 0.0%                                    | 0.0 ± 0.0% |
| Molarity (μM)          | 0.1 ± 0.0                                     | 0.1 ± 0.0  |
| PSD copy number        | 0 ± 0.0                                       | 0 ± 0.0    |
| % in PSD               | 0.0 ± 0.0%                                    | 0.0 ± 0.0% |

|          | Spine copy number | % of total protein | Molarity ( $\mu\text{M}$ ) | PSD copy number |
|----------|-------------------|--------------------|----------------------------|-----------------|
| Mushroom | $7.4 \pm 1.3$     | $0.0 \pm 0.0\%$    | $0.1 \pm 0.0$              | $0 \pm 0.0$     |
| Stubby   | $7.6 \pm 1.3$     | $0.0 \pm 0.0\%$    | $0.1 \pm 0.0$              | $0 \pm 0.0$     |

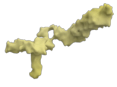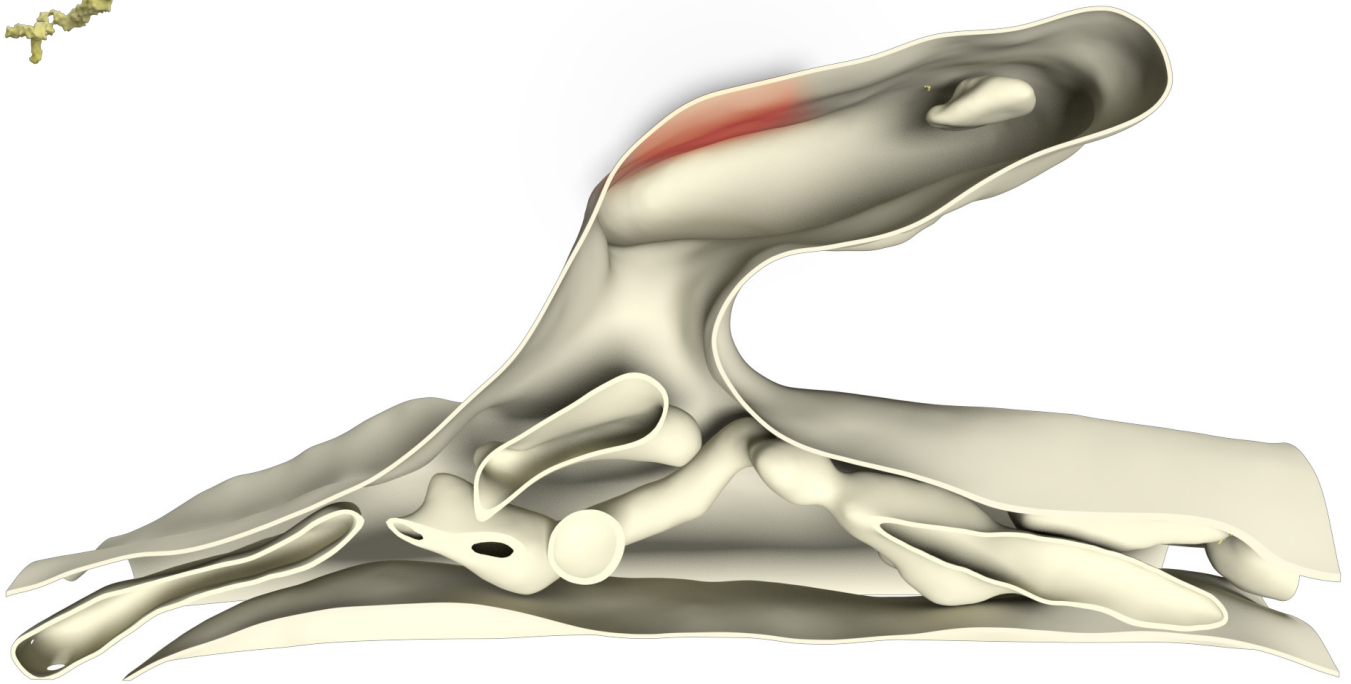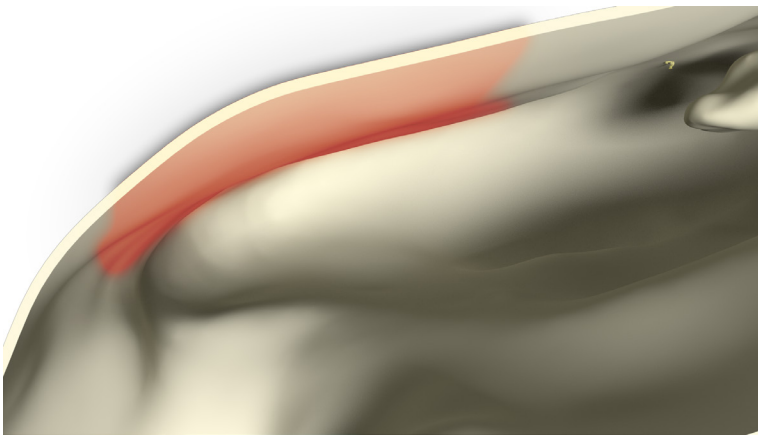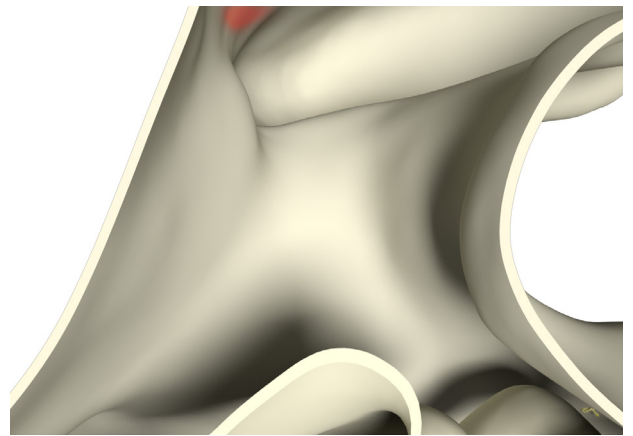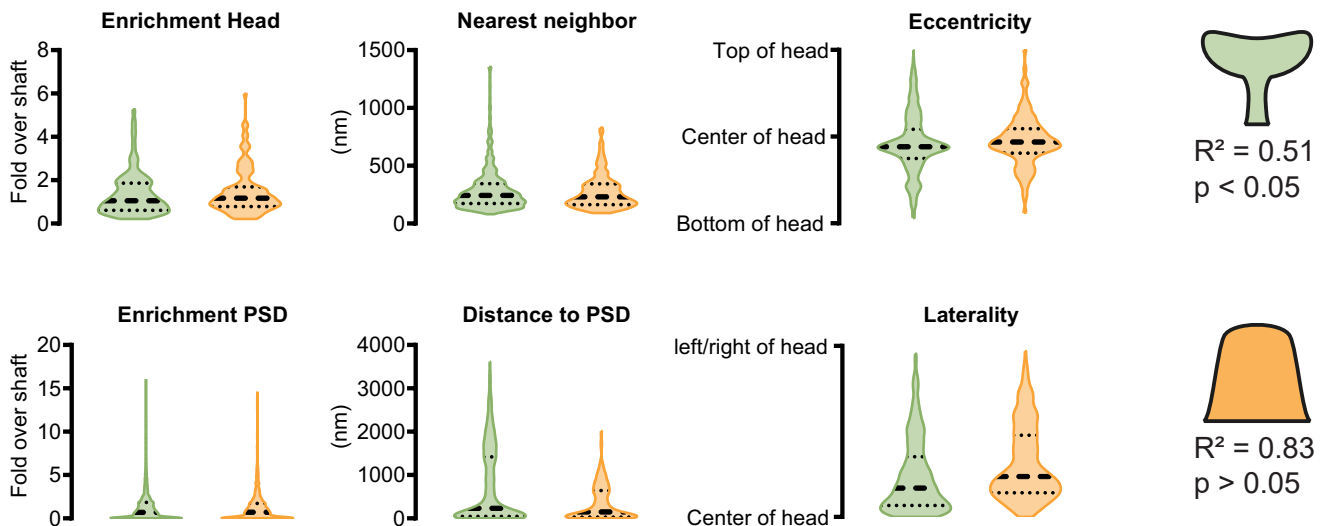

|          | Spine copy number | % of total protein | Molarity ( $\mu\text{M}$ ) | PSD copy number |
|----------|-------------------|--------------------|----------------------------|-----------------|
| Mushroom | $7.4 \pm 1.3$     | $0.0 \pm 0.0\%$    | $0.1 \pm 0.0$              | $0 \pm 0.0$     |
| Stubby   | $7.6 \pm 1.3$     | $0.0 \pm 0.0\%$    | $0.1 \pm 0.0$              | $0 \pm 0.0$     |

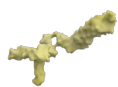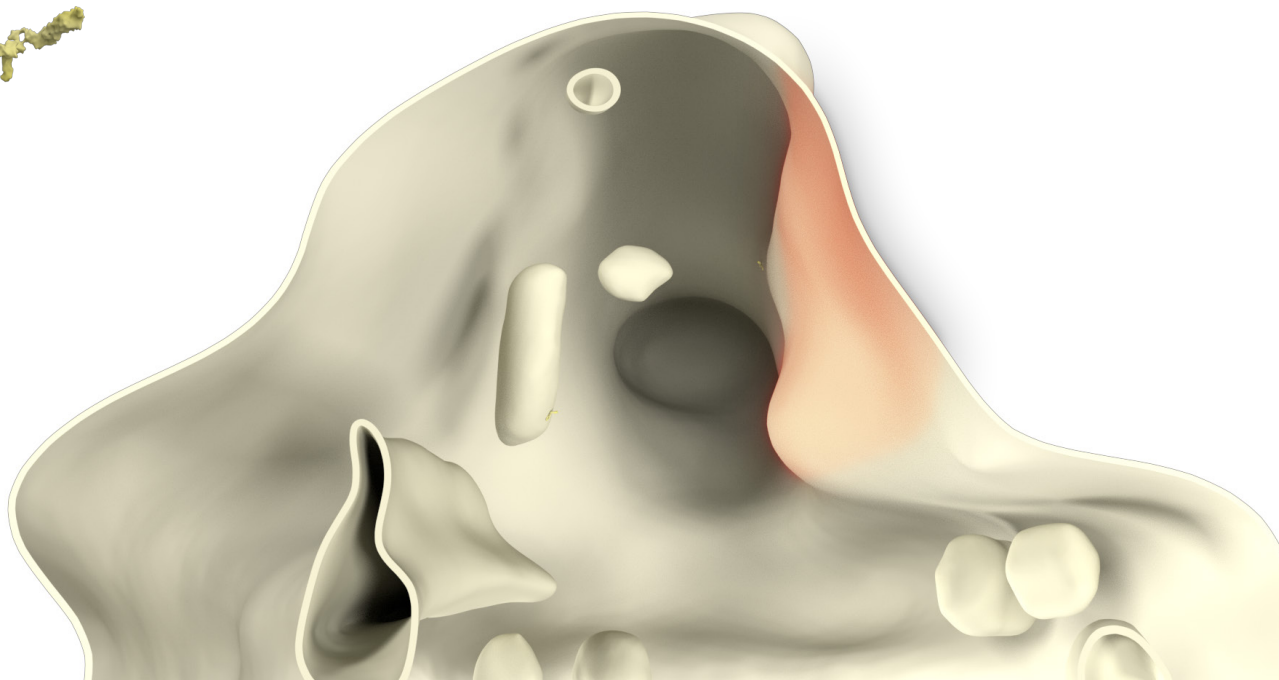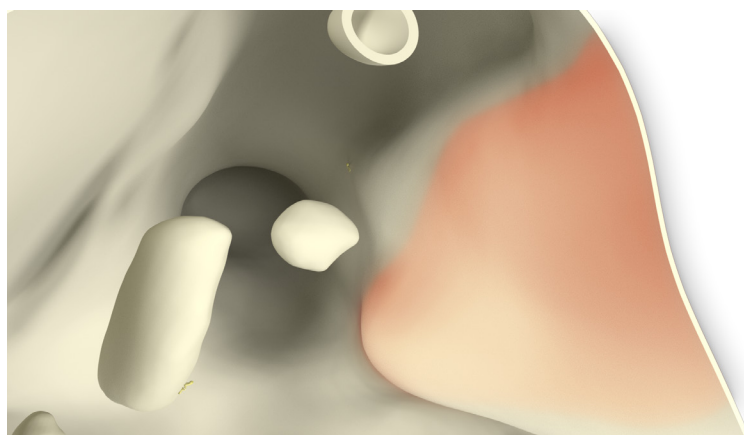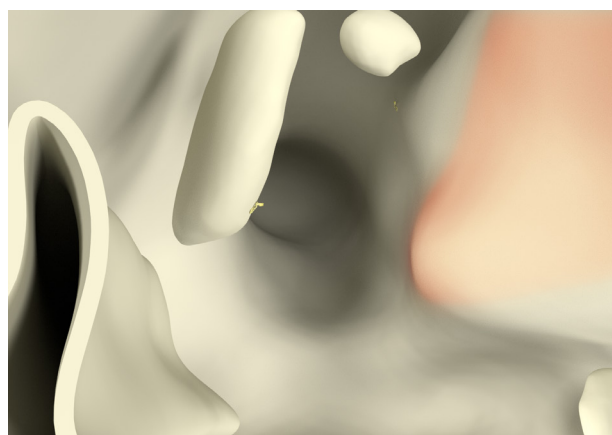

## References

**Antibody:** Synaptic Systems 110 042

**PDB Identifier:** modified Syntaxin1

### Literature:

Bin et al., 2018, Cell Rep.

Bin et al., 2018, Cell Rep.

Gu and Huganir, 2016, Proc. Natl. Acad. Sci. U S A

Harris et al., 2016, Elife

Kennedy et al., 2010, Cell

Predescu et al., 2005, J. Biol. Chem.

Sieber et al., 2006, Biophys. J.



## Syntaxin5 (Gene: Stx5, Uniprot ID: Q08851)

**Known function:** Qa SNARE, ER-Golgi transport

**Known organization:** Transmembrane protein, On Golgi

**Known Interactions:** Sec22b

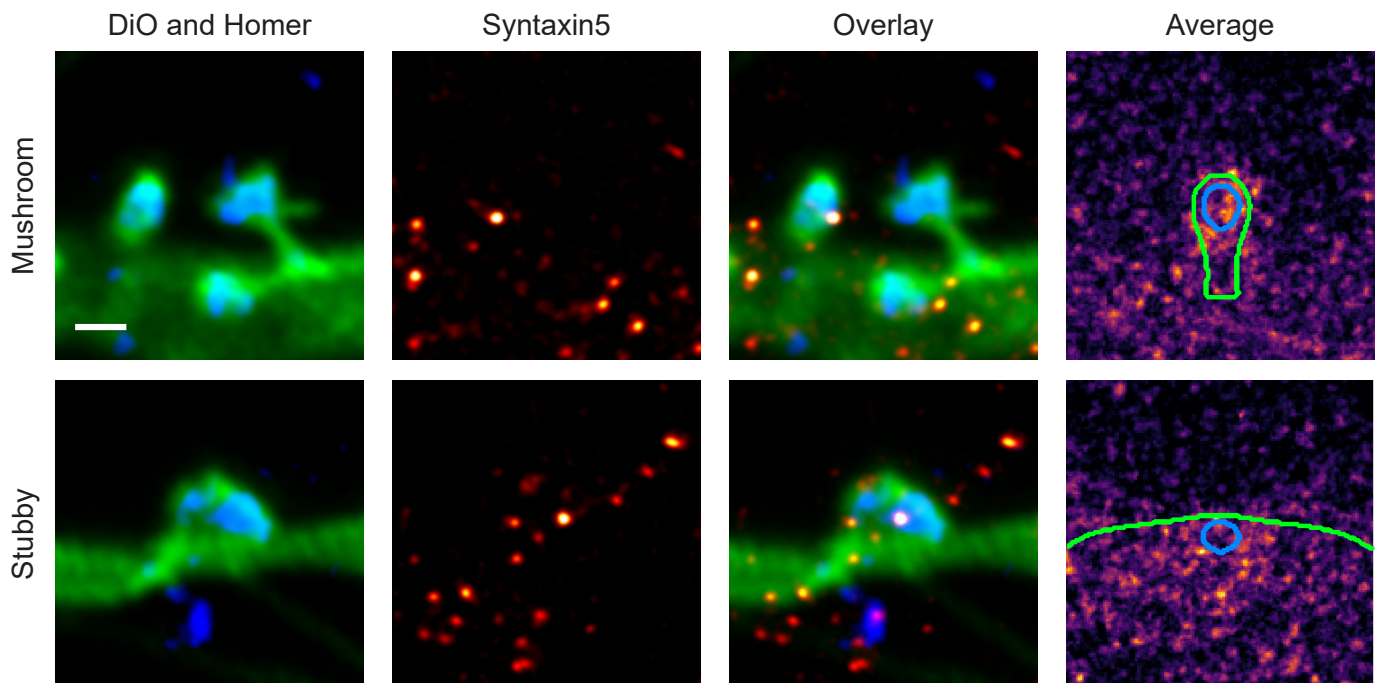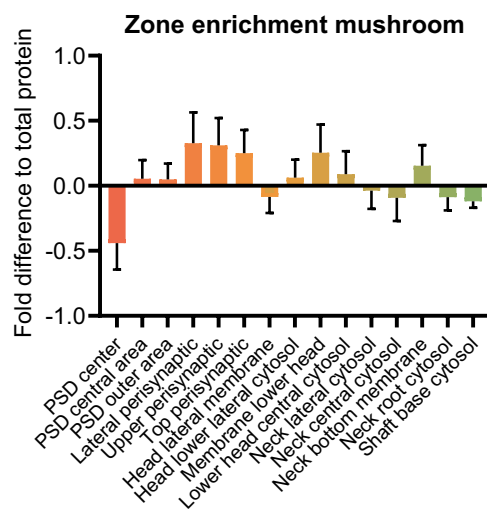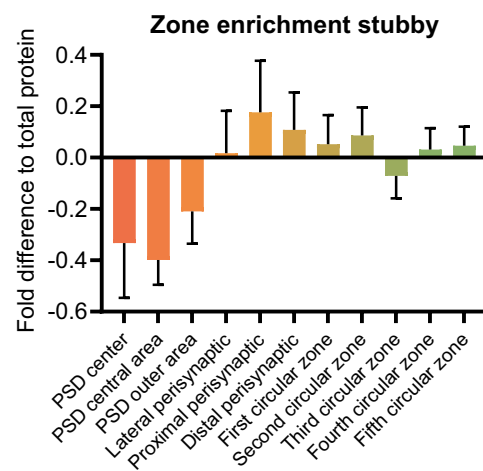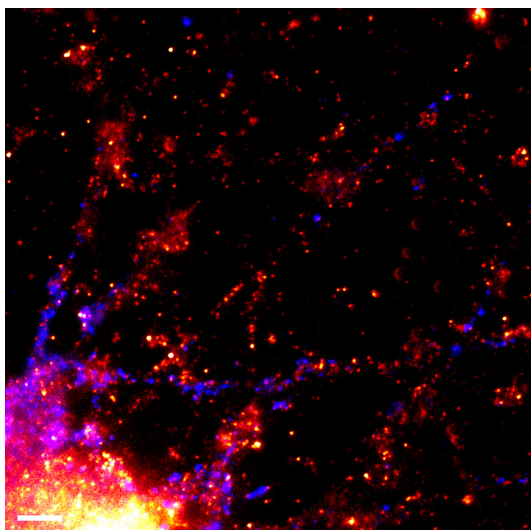

|                        |                            |            |
|------------------------|----------------------------|------------|
| Whole cell copy number | 115366.8 ± 41933.2         |            |
| Spine copy number      | 7.8 ± 3.7                  |            |
| Function               | SNAREs and assoc. proteins |            |
|                        | Mushroom                   | Stubby     |
| Spine copy number      | 7.3 ± 3.5                  | 9.1 ± 4.4  |
| % of total protein     | 0.0 ± 0.0%                 | 0.0 ± 0.0% |
| Molarity (μM)          | 0.1 ± 0.0                  | 0.1 ± 0.0  |
| PSD copy number        | 0 ± 0.0                    | 0 ± 0.0    |
| % in PSD               | 0.0 ± 0.0%                 | 0.0 ± 0.0% |

|          | Spine copy number | % of total protein | Molarity ( $\mu\text{M}$ ) | PSD copy number |
|----------|-------------------|--------------------|----------------------------|-----------------|
| Mushroom | $7.3 \pm 3.5$     | $0.0 \pm 0.0\%$    | $0.1 \pm 0.0$              | $0 \pm 0.0$     |
| Stubby   | $9.1 \pm 4.4$     | $0.0 \pm 0.0\%$    | $0.1 \pm 0.0$              | $0 \pm 0.0$     |

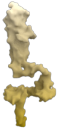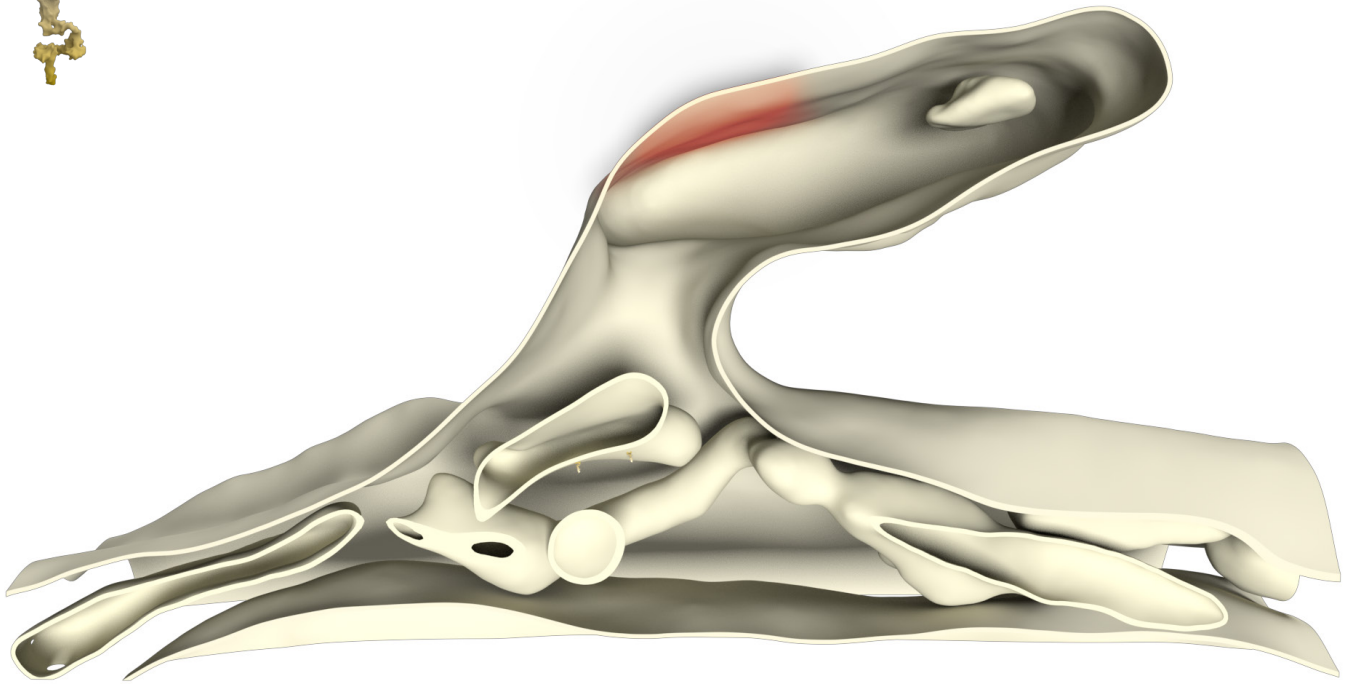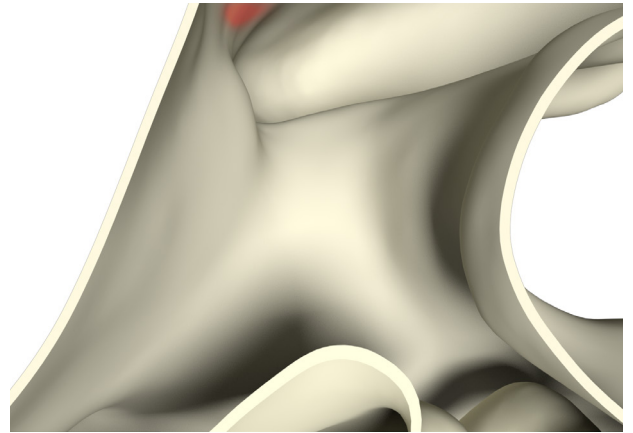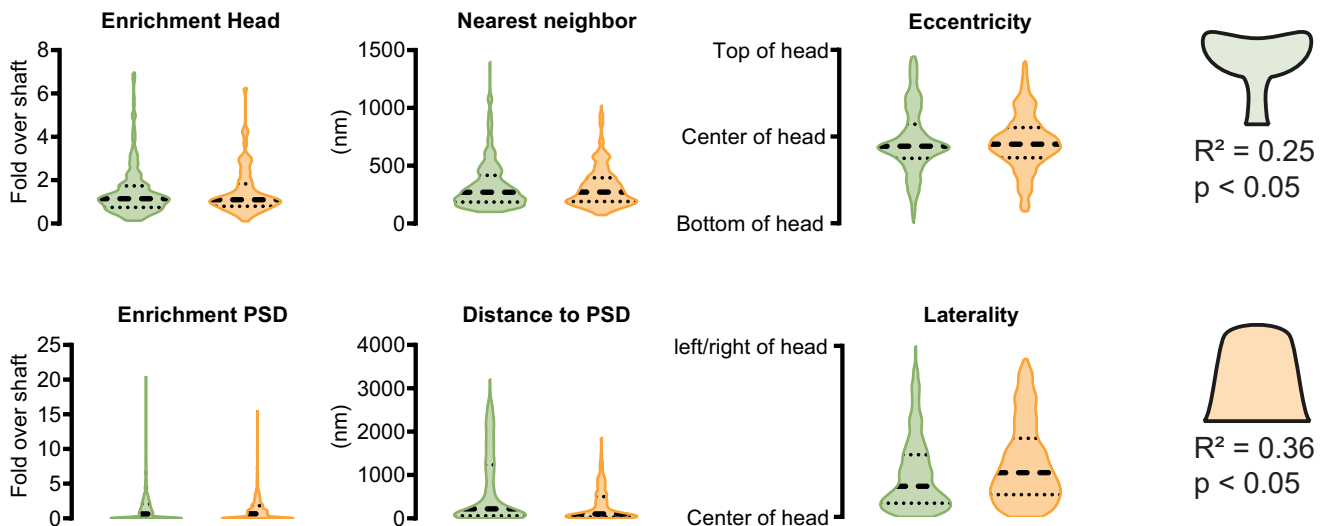

|          | Spine copy number | % of total protein | Molarity ( $\mu\text{M}$ ) | PSD copy number |
|----------|-------------------|--------------------|----------------------------|-----------------|
| Mushroom | $7.3 \pm 3.5$     | $0.0 \pm 0.0\%$    | $0.1 \pm 0.0$              | $0 \pm 0.0$     |
| Stubby   | $9.1 \pm 4.4$     | $0.0 \pm 0.0\%$    | $0.1 \pm 0.0$              | $0 \pm 0.0$     |

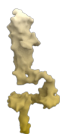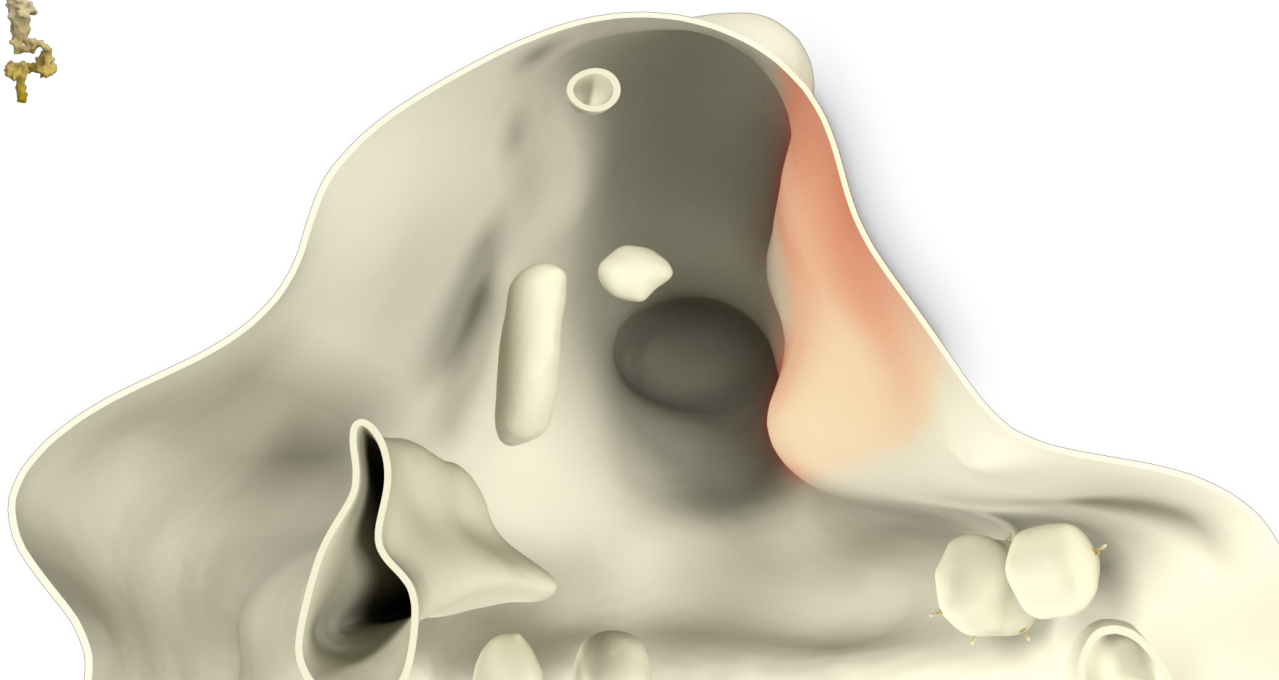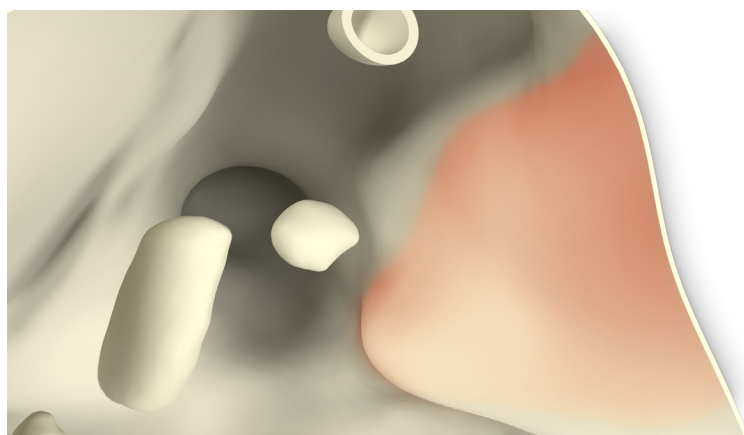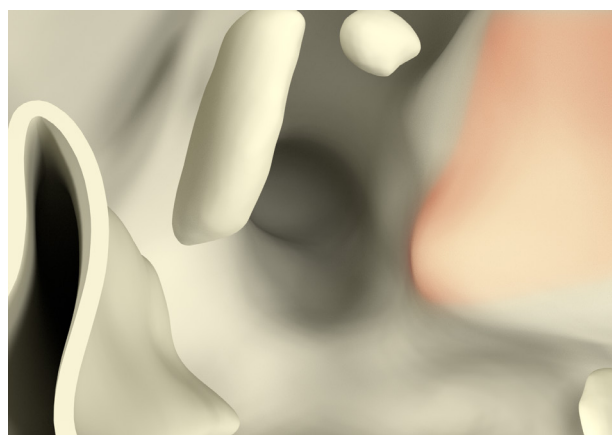

## References

**Antibody:** Synaptic Systems 110 053

**PDB Identifier:** modified Syntaxin1

### Literature:

Hay et al., 1997, Cell

Hong, 2005, Biochim. Biophys. Acta.

Parlati et al., 2000, Nature

Renna et al., 2011, J. Cell. Sci.



## Syntaxin6 (Gene: Stx6, Uniprot ID: Q63635)

**Known function:** Qc SNARE, Late secretory pathway, Various endosomal fusion events

**Known organization:** Transmembrane protein, On TGN and endosomes

**Known Interactions:** Syntaxin4, Syntaxin16, VAMP2, VAMP7, SNAP23, SNAP25, SNAP29, Vti1a

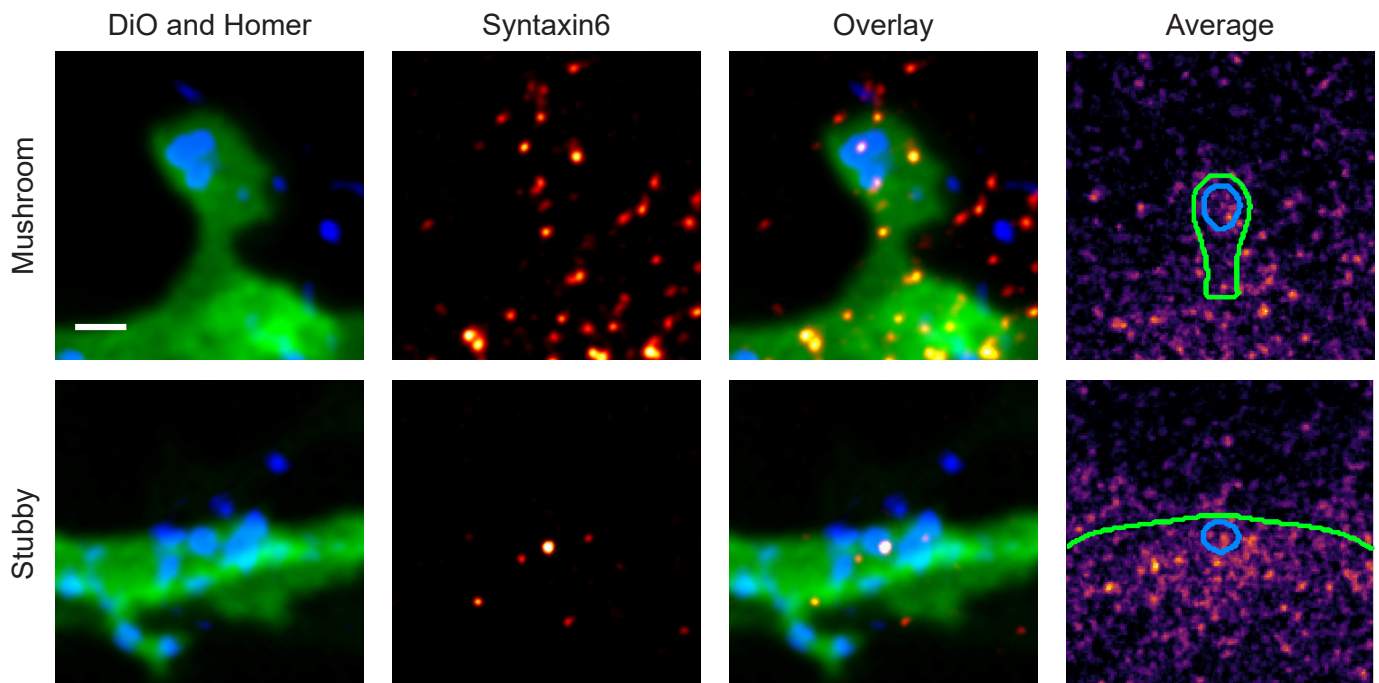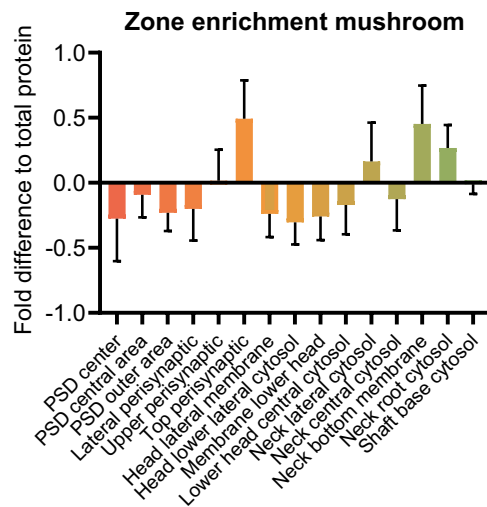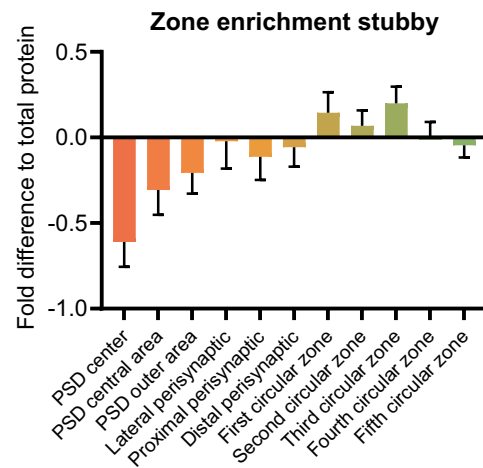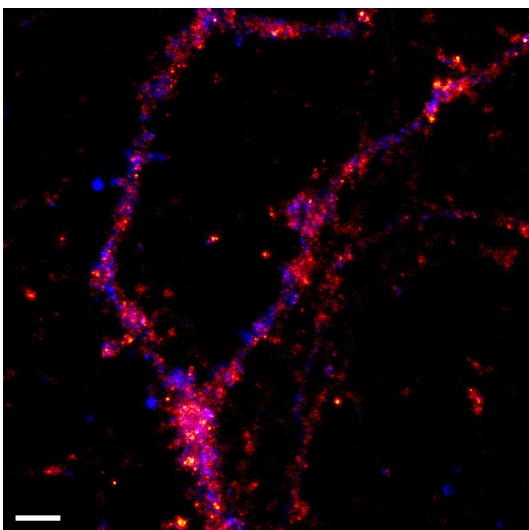

|                        |                            |             |
|------------------------|----------------------------|-------------|
| Whole cell copy number | 724286.9 ± 177387.1        |             |
| Spine copy number      | 38.9 ± 23.5                |             |
| Function               | SNAREs and assoc. proteins |             |
|                        | Mushroom                   | Stubby      |
| Spine copy number      | 33.0 ± 19.9                | 46.8 ± 28.2 |
| % of total protein     | 0.0 ± 0.0%                 | 0.0 ± 0.0%  |
| Molarity (μM)          | 0.4 ± 0.3                  | 0.4 ± 0.3   |
| PSD copy number        | 0 ± 0.0                    | 0 ± 0.0     |
| % in PSD               | 0.0 ± 0.0%                 | 0.0 ± 0.0%  |

|          | Spine copy number | % of total protein | Molarity ( $\mu\text{M}$ ) | PSD copy number |
|----------|-------------------|--------------------|----------------------------|-----------------|
| Mushroom | $33.0 \pm 19.9$   | $0.0 \pm 0.0\%$    | $0.4 \pm 0.3$              | $0 \pm 0.0$     |
| Stubby   | $46.8 \pm 28.2$   | $0.0 \pm 0.0\%$    | $0.4 \pm 0.3$              | $0 \pm 0.0$     |

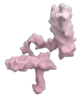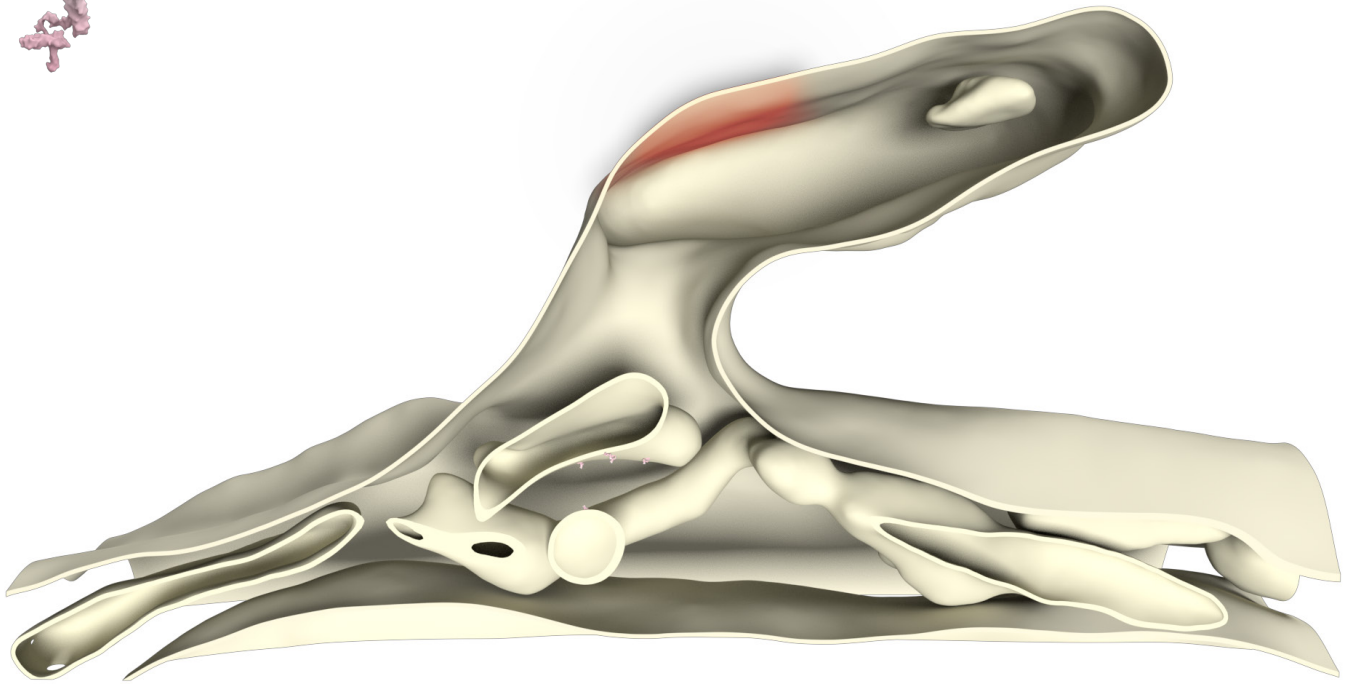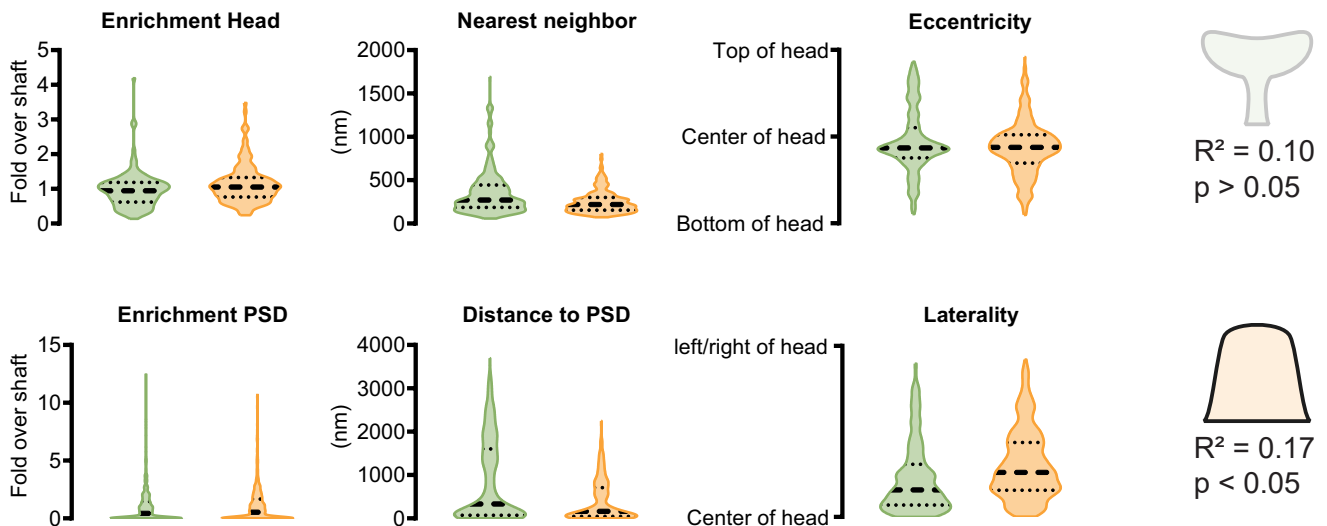

|          | Spine copy number | % of total protein | Molarity ( $\mu\text{M}$ ) | PSD copy number |
|----------|-------------------|--------------------|----------------------------|-----------------|
| Mushroom | $33.0 \pm 19.9$   | $0.0 \pm 0.0\%$    | $0.4 \pm 0.3$              | $0 \pm 0.0$     |
| Stubby   | $46.8 \pm 28.2$   | $0.0 \pm 0.0\%$    | $0.4 \pm 0.3$              | $0 \pm 0.0$     |

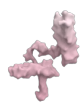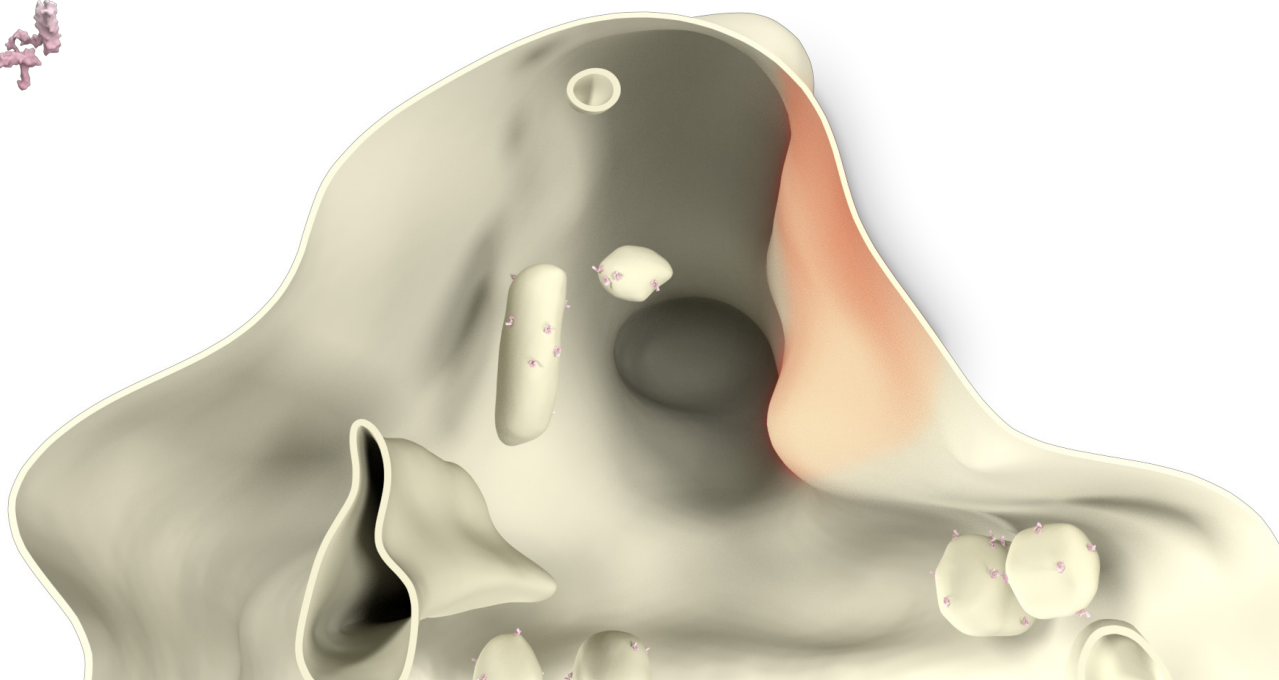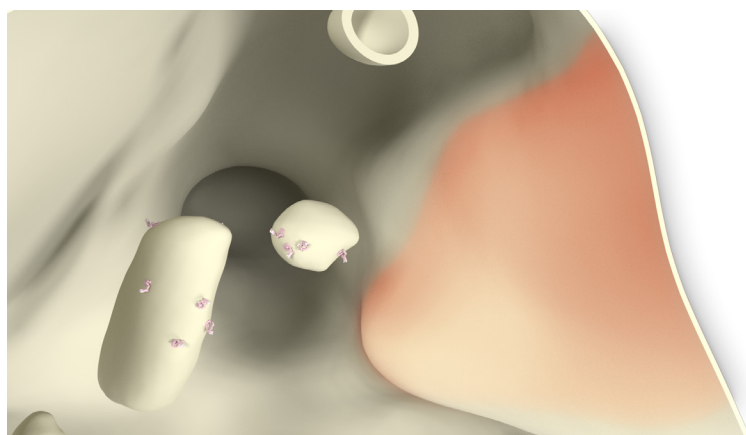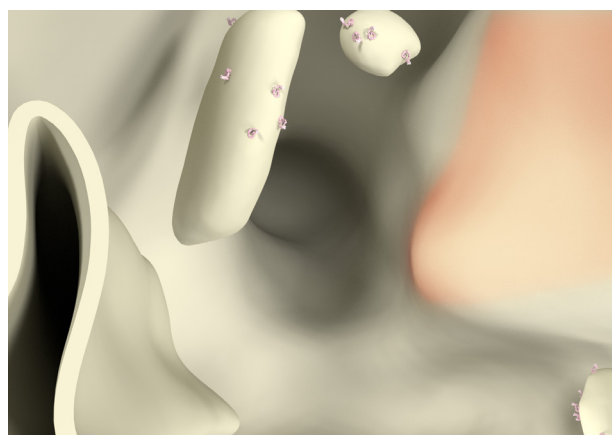

## References

**Antibody:** Cell Signalin 2869

**PDB Identifier:** 1lvf, 4j2c

### Literature:

Antonin et al., 2000, EMBO J.

Gerrard et al., 2000, Traffic

Hanson et al., 1995, J. Biol. Chem.

Hong, 2005, Biochim. Biophys. Acta.

McMahon et al., 1993, Nature

Wade et al., 2001, J. Biol. Chem.

Watson and Pessin, 2000, J. Biol. Chem.

Wendler and Tooze, 2001, Traffic

Wong et al., 1999, Mol. Biol. Cell.



Syntaxin8 (Gene: Stx8, Uniprot ID: Q9Z2Q7)

**Known function:** Qc SNARE, Late endosome fusion, Delivery of TrkA transport to PM

**Known organization:** Transmembrane protein, Also palmitoylated, On Golgi, early and late endosome

**Known Interactions:** None

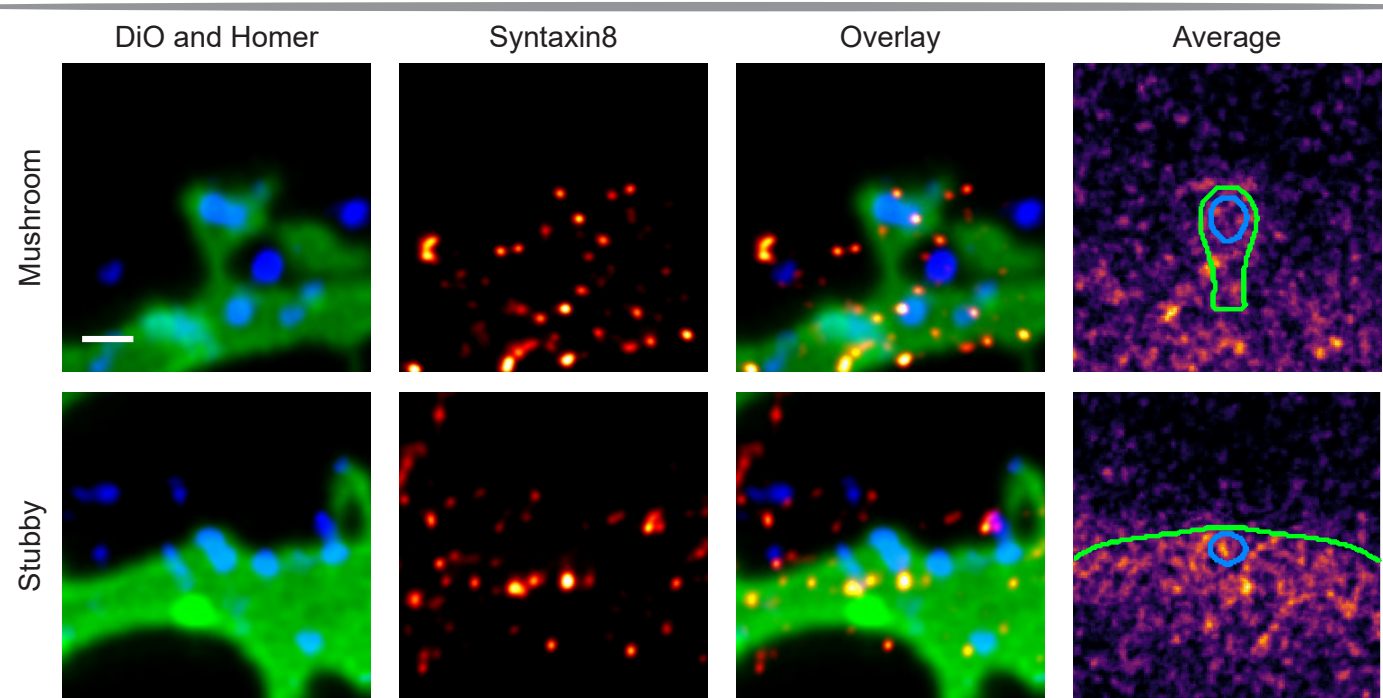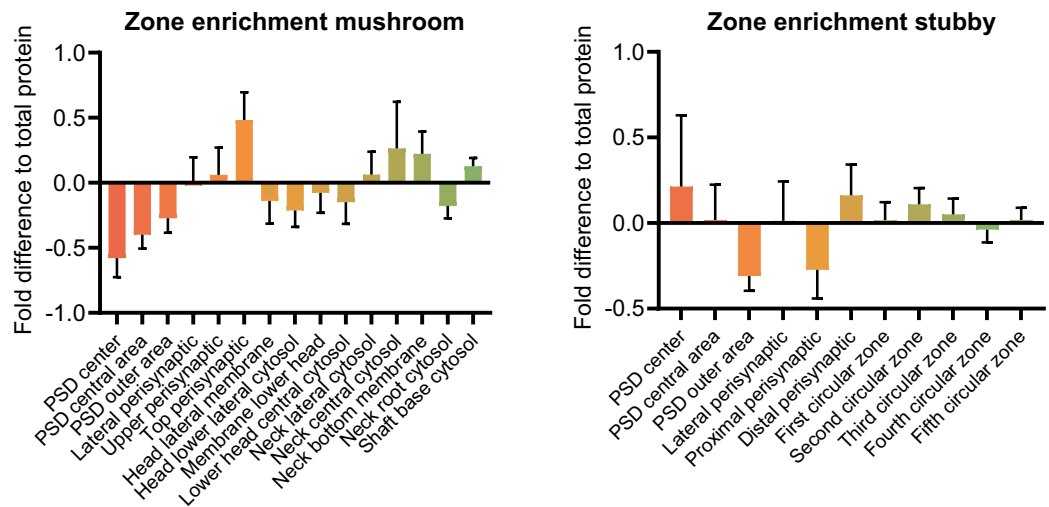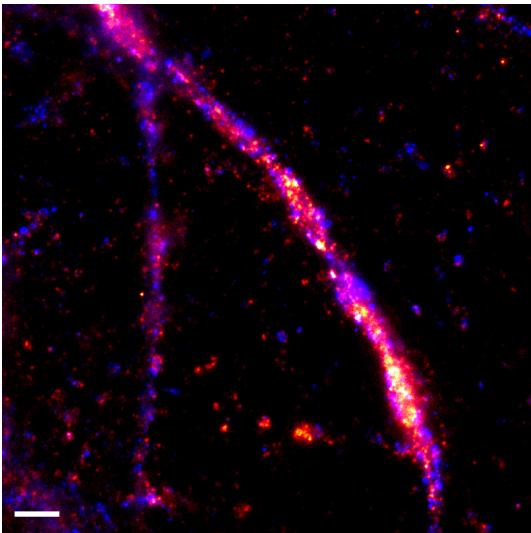

|                        |                            |              |
|------------------------|----------------------------|--------------|
| Whole cell copy number | 736051.6 ± 89670.7         |              |
| Spine copy number      | 114.0 ± 34.5               |              |
| Function               | SNAREs and assoc. proteins |              |
|                        | Mushroom                   | Stubby       |
| Spine copy number      | 85.0 ± 25.7                | 152.4 ± 46.0 |
| % of total protein     | 0.0 ± 0.0%                 | 0.0 ± 0.0%   |
| Molarity (µM)          | 1.1 ± 0.3                  | 1.4 ± 0.4    |
| PSD copy number        | 0 ± 0.0                    | 0 ± 0.0      |
| % in PSD               | 0.0 ± 0.0%                 | 0.0 ± 0.0%   |

|          | Spine copy number | % of total protein | Molarity ( $\mu\text{M}$ ) | PSD copy number |
|----------|-------------------|--------------------|----------------------------|-----------------|
| Mushroom | $85.0 \pm 25.7$   | $0.0 \pm 0.0\%$    | $1.1 \pm 0.3$              | $0 \pm 0.0$     |
| Stubby   | $152.4 \pm 46.0$  | $0.0 \pm 0.0\%$    | $1.4 \pm 0.4$              | $0 \pm 0.0$     |

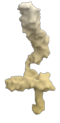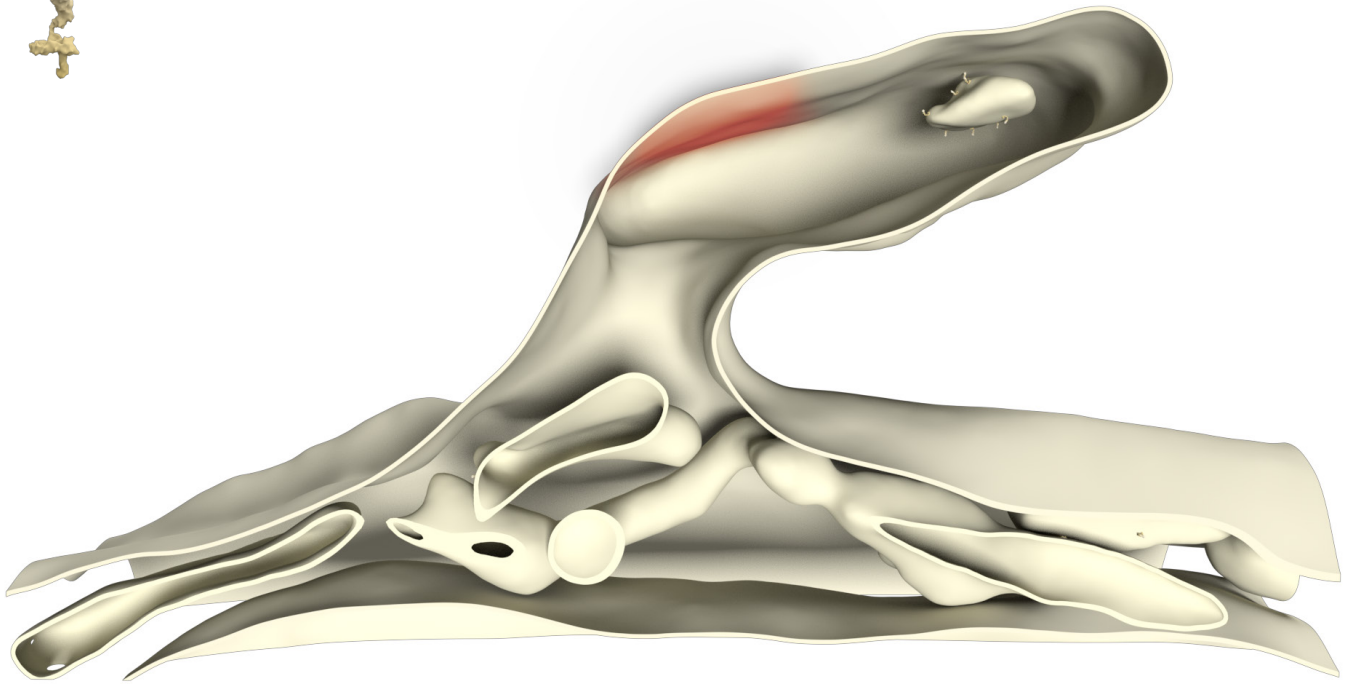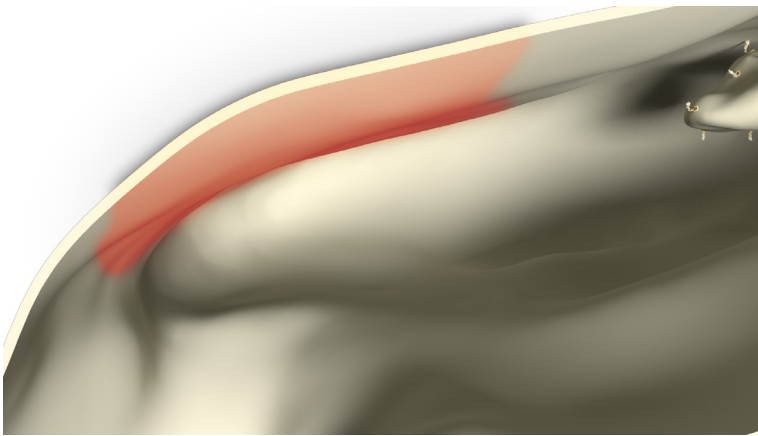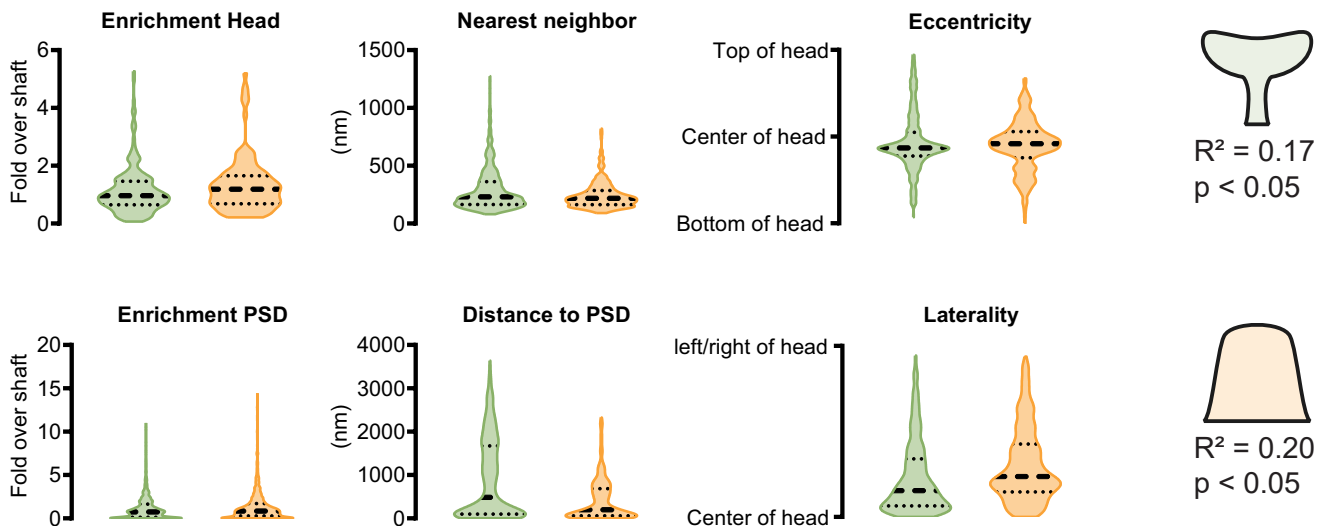

|          | Spine copy number | % of total protein | Molarity ( $\mu\text{M}$ ) | PSD copy number |
|----------|-------------------|--------------------|----------------------------|-----------------|
| Mushroom | $85.0 \pm 25.7$   | $0.0 \pm 0.0\%$    | $1.1 \pm 0.3$              | $0 \pm 0.0$     |
| Stubby   | $152.4 \pm 46.0$  | $0.0 \pm 0.0\%$    | $1.4 \pm 0.4$              | $0 \pm 0.0$     |

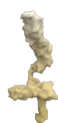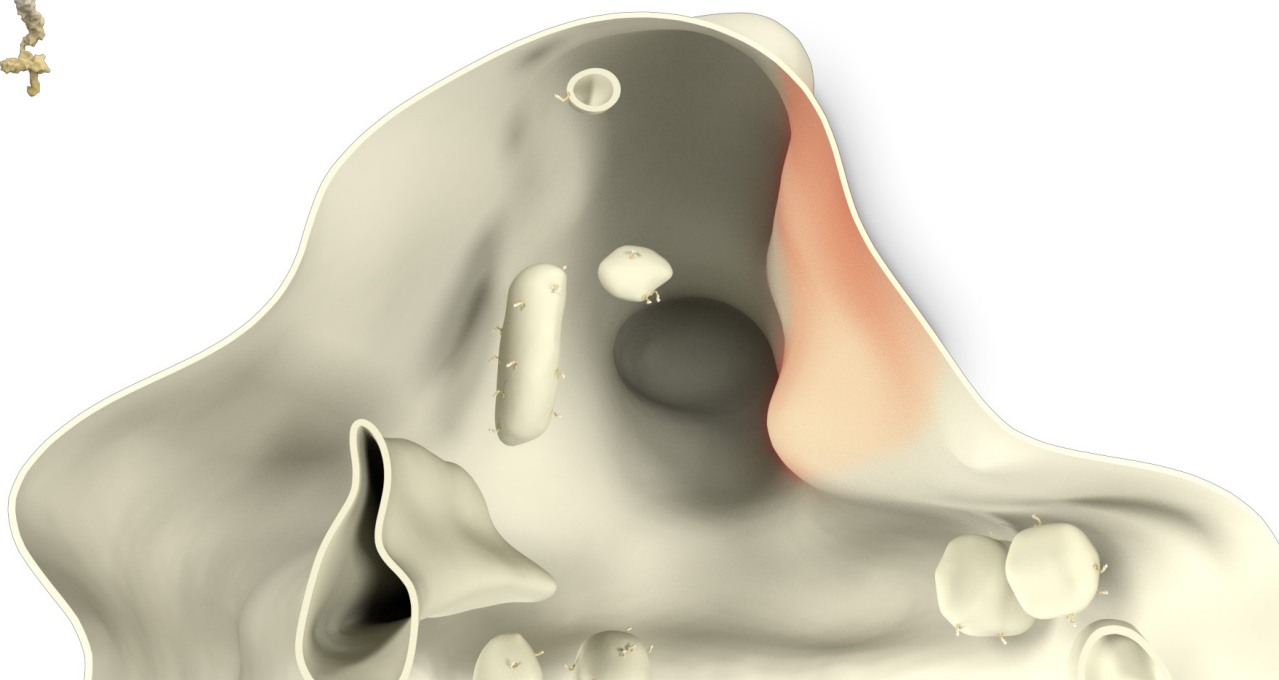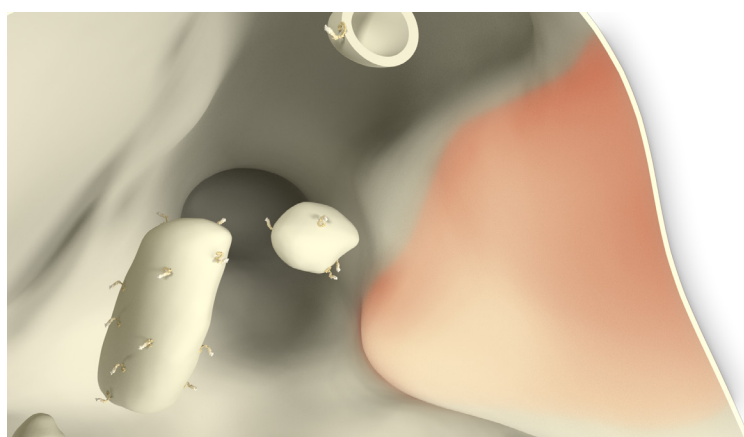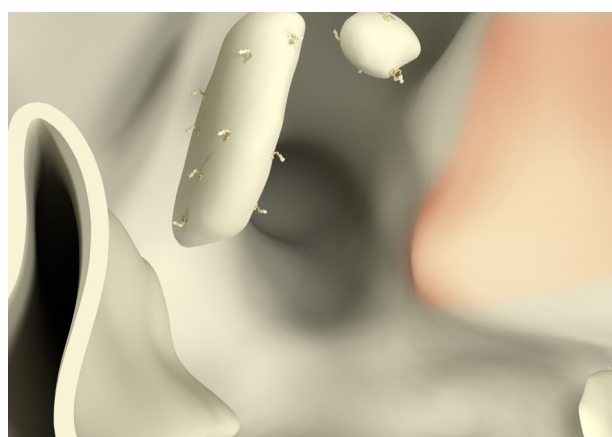

## References

**Antibody:** Synaptic Systems 110 083

**PDB Identifier:** modified Syntaxin1

### Literature:

Antonin et al., 2002, J. Biol. Chem.

Chen et al., 2014, J. Biol. Chem.

He and Linder, 2009, J. Lipid. Res.



## Syntaxin13 (Syntaxin12, Gene: Stx12, Uniprot ID: G3V7P1)

**Known function:** Qa SNARE, Homotypic endosome fusion, Delivery of AMPAR to PM

**Known organization:** Transmembrane protien, On early and sorting endosomes

**Known Interactions:** Syntaxin6, VAMP4, Vti1a

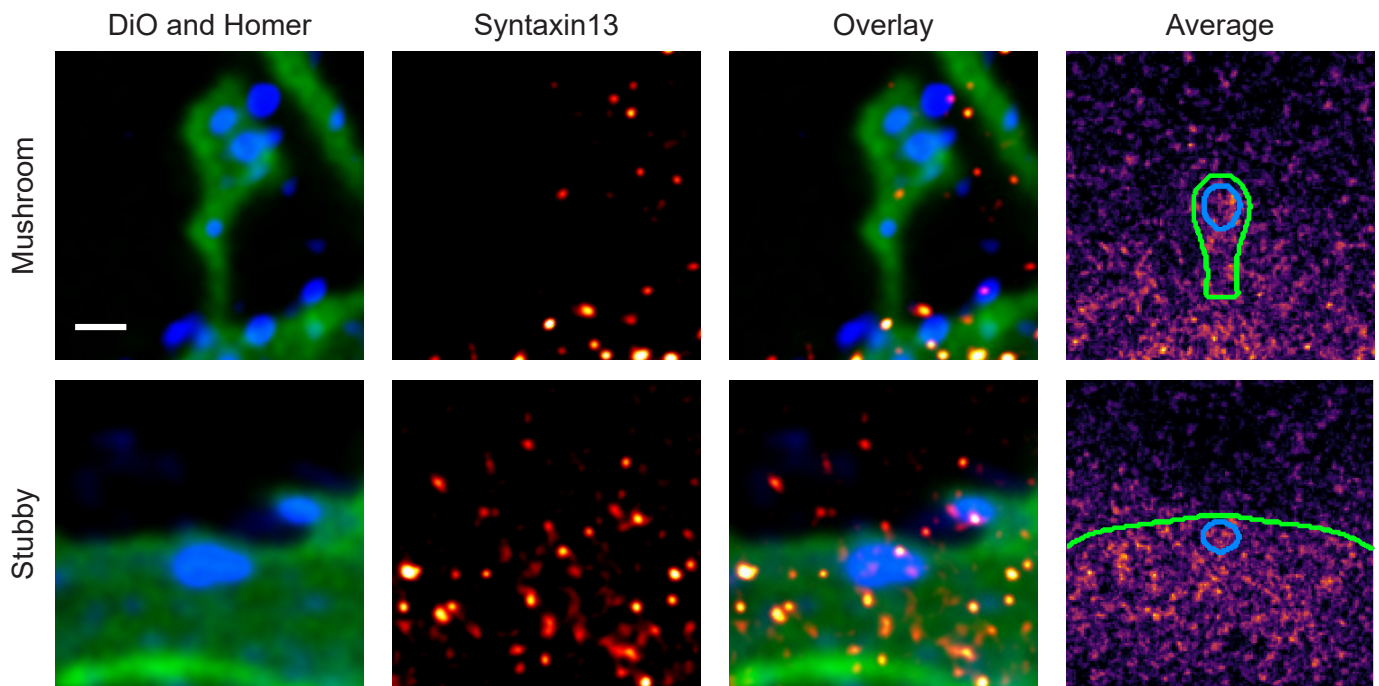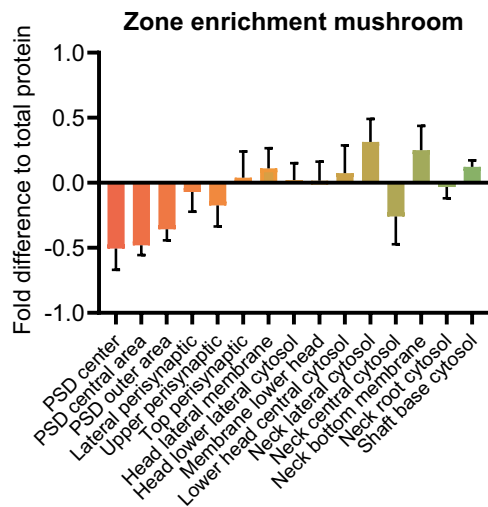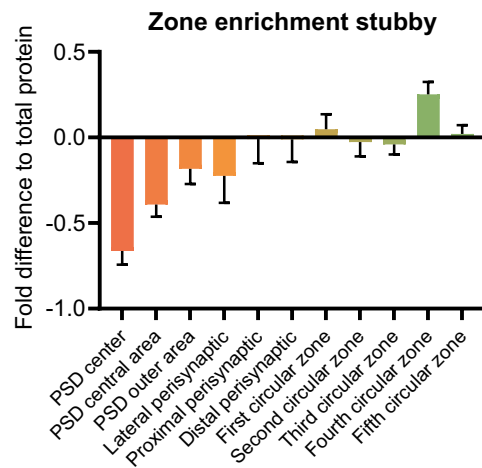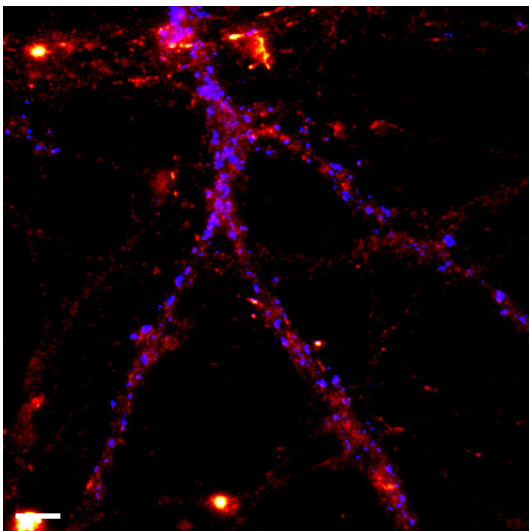

|                        |                            |               |
|------------------------|----------------------------|---------------|
| Whole cell copy number | 3522048.0 ± 551593.1       |               |
| Spine copy number      | 455.7 ± 129.7              |               |
| Function               | SNAREs and assoc. proteins |               |
|                        | Mushroom                   | Stubby        |
| Spine copy number      | 378.4 ± 107.7              | 529.7 ± 150.8 |
| % of total protein     | 0.1 ± 0.0%                 | 0.1 ± 0.0%    |
| Molarity (μM)          | 4.8 ± 1.4                  | 5.0 ± 1.4     |
| PSD copy number        | 0 ± 0.0                    | 0 ± 0.0       |
| % in PSD               | 0.0 ± 0.0%                 | 0.0 ± 0.0%    |

|          | Spine copy number | % of total protein | Molarity ( $\mu\text{M}$ ) | PSD copy number |
|----------|-------------------|--------------------|----------------------------|-----------------|
| Mushroom | $378.4 \pm 107.7$ | $0.1 \pm 0.0\%$    | $4.8 \pm 1.4$              | $0 \pm 0.0$     |
| Stubby   | $529.7 \pm 150.8$ | $0.1 \pm 0.0\%$    | $5.0 \pm 1.4$              | $0 \pm 0.0$     |

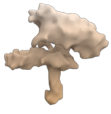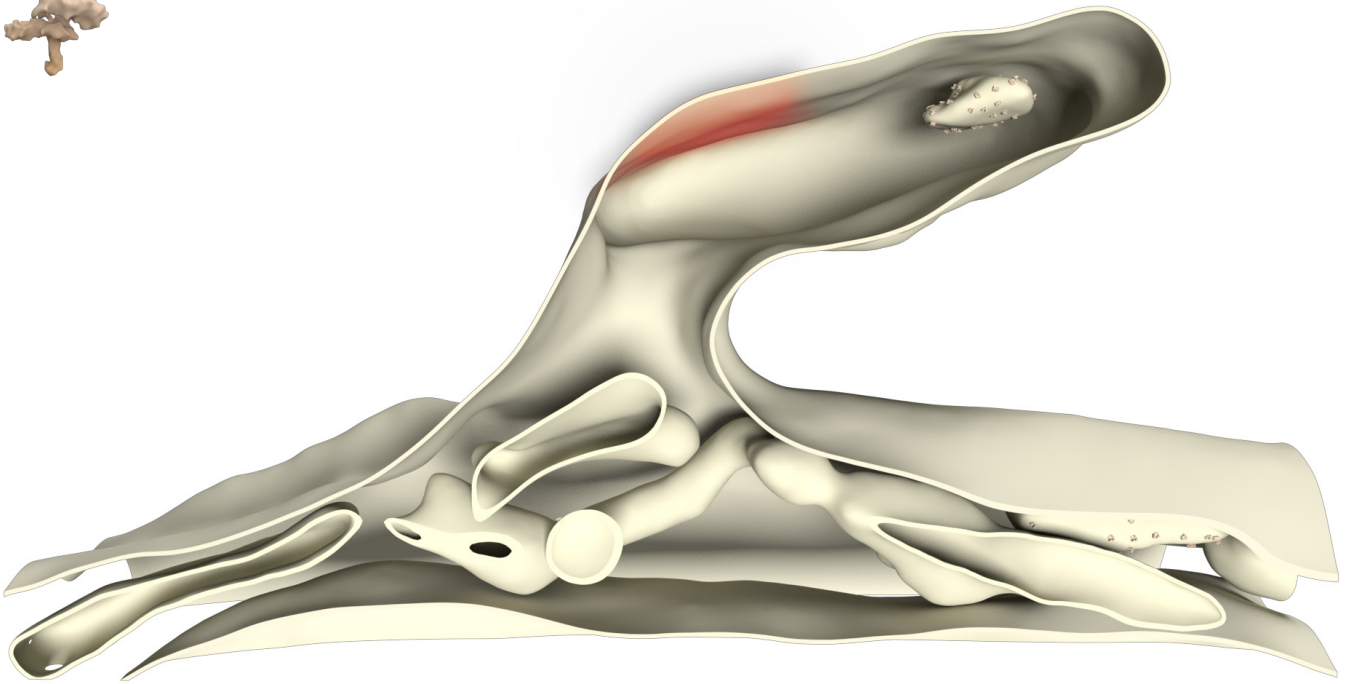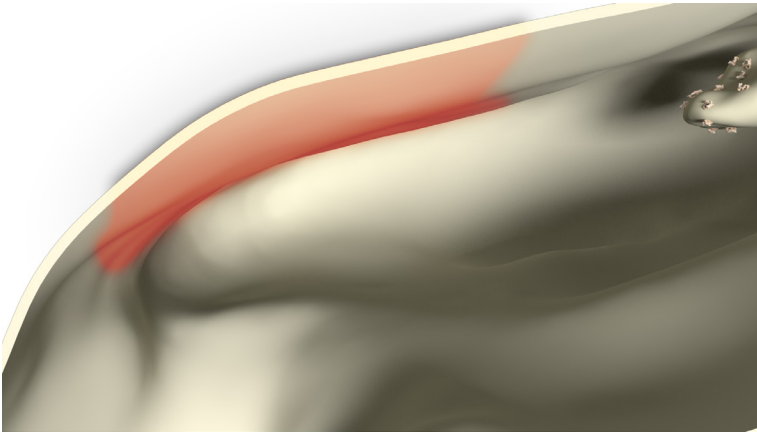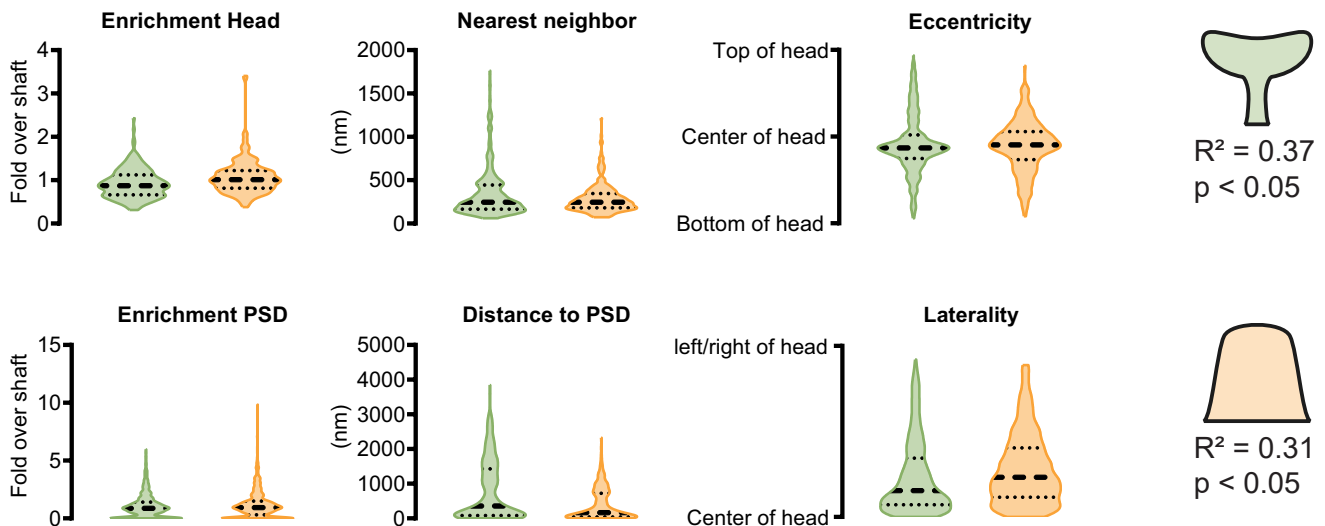

|          | Spine copy number | % of total protein | Molarity ( $\mu\text{M}$ ) | PSD copy number |
|----------|-------------------|--------------------|----------------------------|-----------------|
| Mushroom | $378.4 \pm 107.7$ | $0.1 \pm 0.0\%$    | $4.8 \pm 1.4$              | $0 \pm 0.0$     |
| Stubby   | $529.7 \pm 150.8$ | $0.1 \pm 0.0\%$    | $5.0 \pm 1.4$              | $0 \pm 0.0$     |

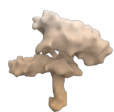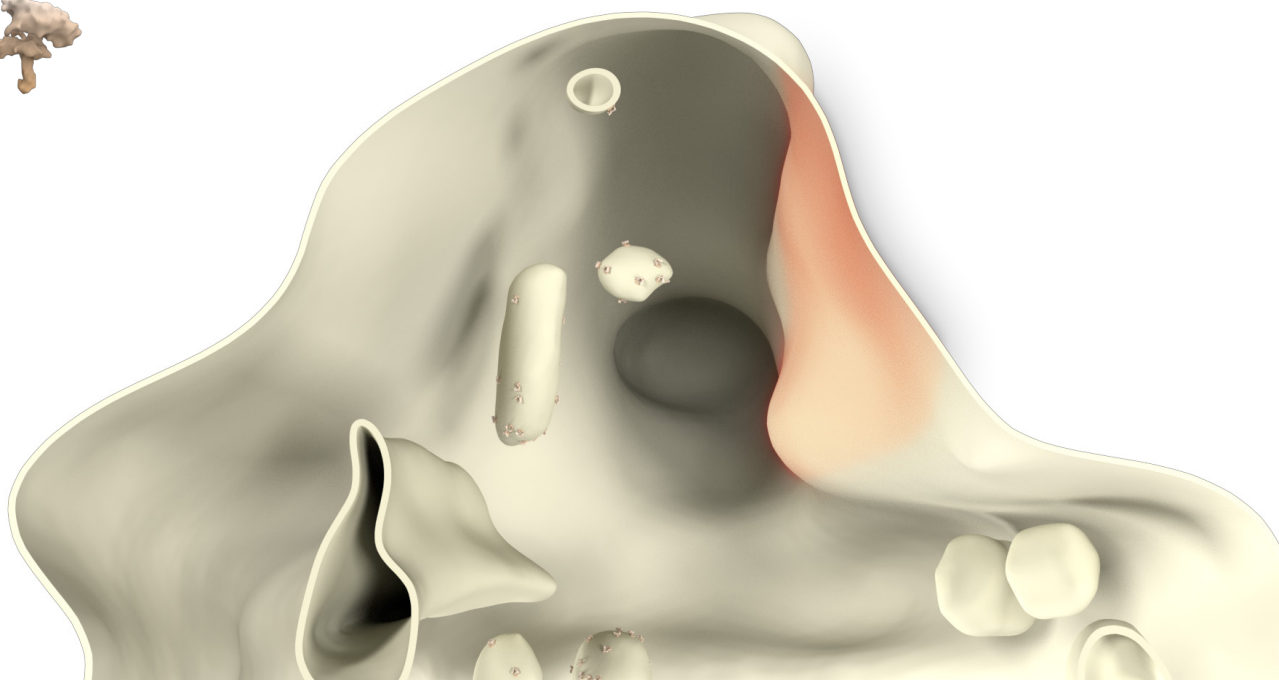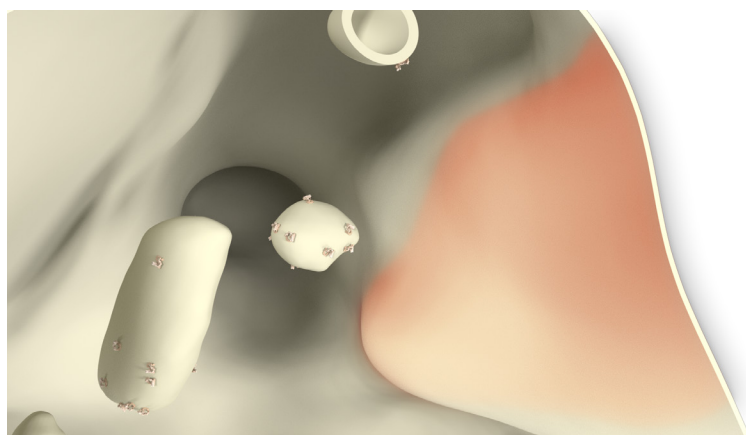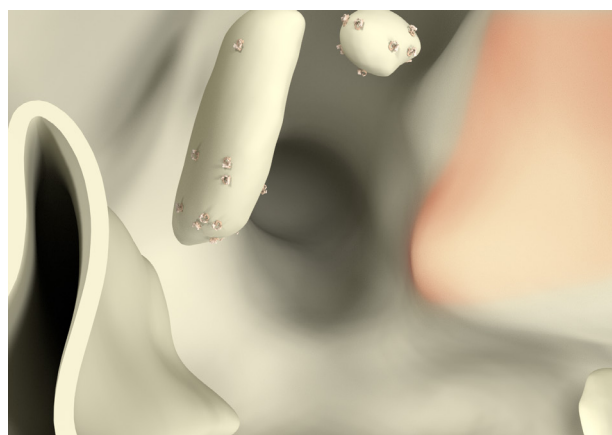

## References

**Antibody:** Reinhardt Jahn laboratory cl. 151.1

**PDB Identifier:** modified Syntaxin1

### Literature:

Aikawa et al., 2006, Mol. Biol. Cell.

Zwilling et al., 2007, EMBO J.

Antonin et al., 2002, J. Biol. Chem.

Brandhorst et al., 2006, Proc. Natl. Acad. Sci. U S A

Hirling et al., 2000, Eur. J. Neurosci.

Hong, 2005, Biochim. Biophys. Acta.

McBride et al., 1999, Cell

Park et al., 2004, Science

Petrini et al., 2009, Neuron



Syntaxin16 (Gene: Stx16, Uniprot ID: D3Z9R7)

**Known function:** Qa SNARE, Homotypic endosome fusion, Endosome-TGN transport, Important for dendritic protein traffic

**Known organization:** Tail-anchored, On Endosomes, TGN

**Known Interactions:** Syntaxin6, VAMP4, Vti1a

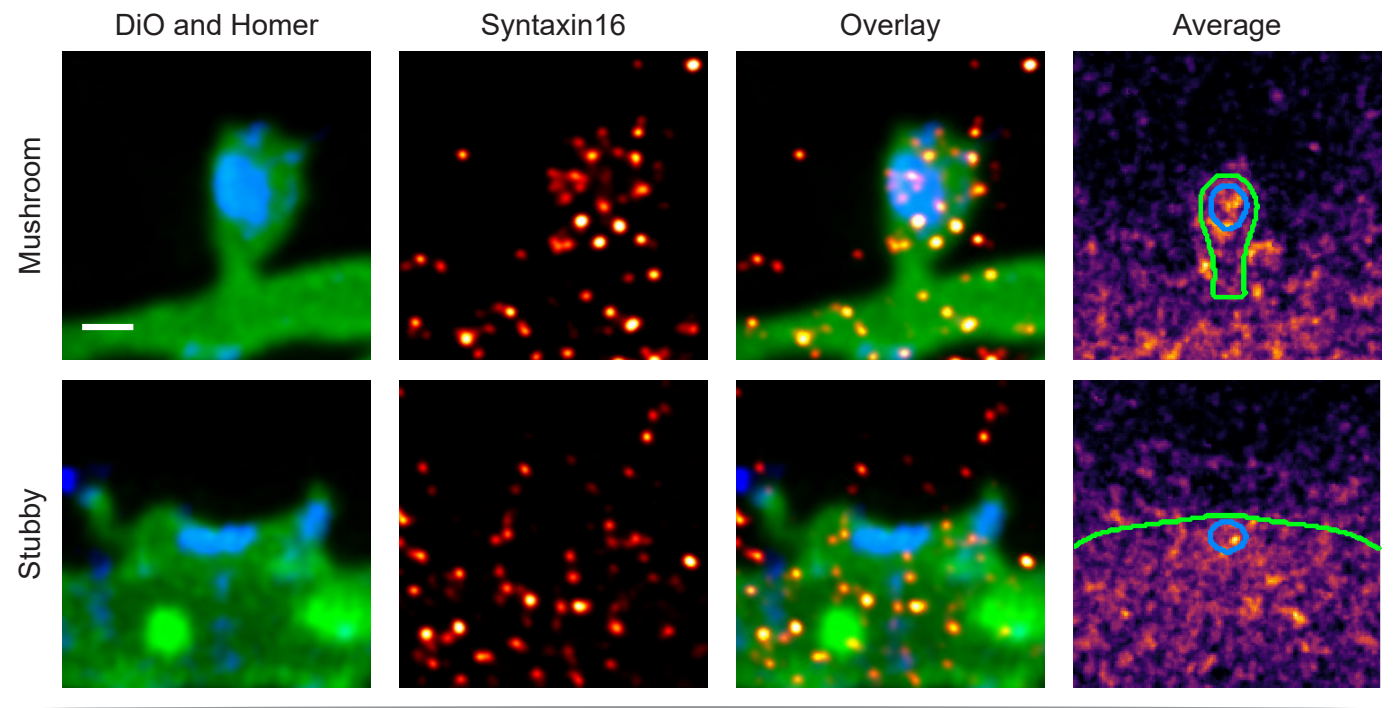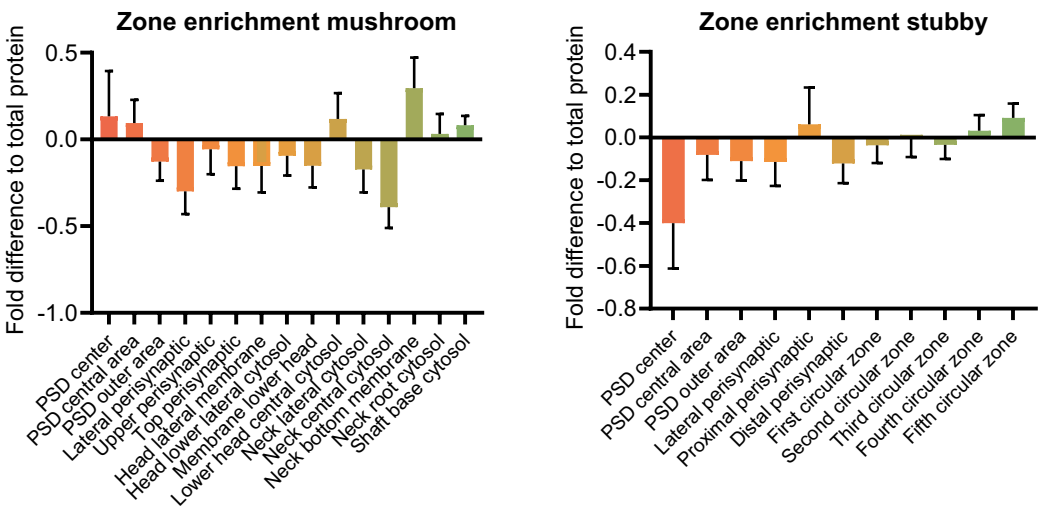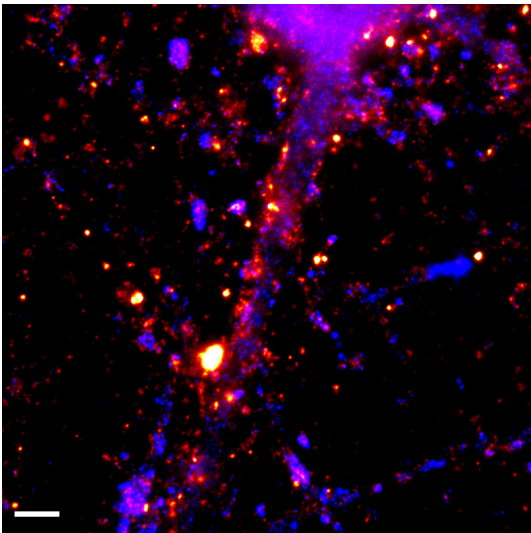

|                        |                            |             |
|------------------------|----------------------------|-------------|
| Whole cell copy number | 184711.4 ± 33565.3         |             |
| Spine copy number      | 54.0 ± 13.0                |             |
| Function               | SNAREs and assoc. proteins |             |
|                        | Mushroom                   | Stubby      |
| Spine copy number      | 45.7 ± 11.0                | 68.0 ± 16.4 |
| % of total protein     | 0.0 ± 0.0%                 | 0.0 ± 0.0%  |
| Molarity (µM)          | 0.6 ± 0.1                  | 0.6 ± 0.2   |
| PSD copy number        | 0 ± 0.0                    | 0 ± 0.0     |
| % in PSD               | 0.0 ± 0.0%                 | 0.0 ± 0.0%  |

|          | Spine copy number | % of total protein | Molarity ( $\mu\text{M}$ ) | PSD copy number |
|----------|-------------------|--------------------|----------------------------|-----------------|
| Mushroom | $45.7 \pm 11.0$   | $0.0 \pm 0.0\%$    | $0.6 \pm 0.1$              | $0 \pm 0.0$     |
| Stubby   | $68.0 \pm 16.4$   | $0.0 \pm 0.0\%$    | $0.6 \pm 0.2$              | $0 \pm 0.0$     |

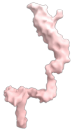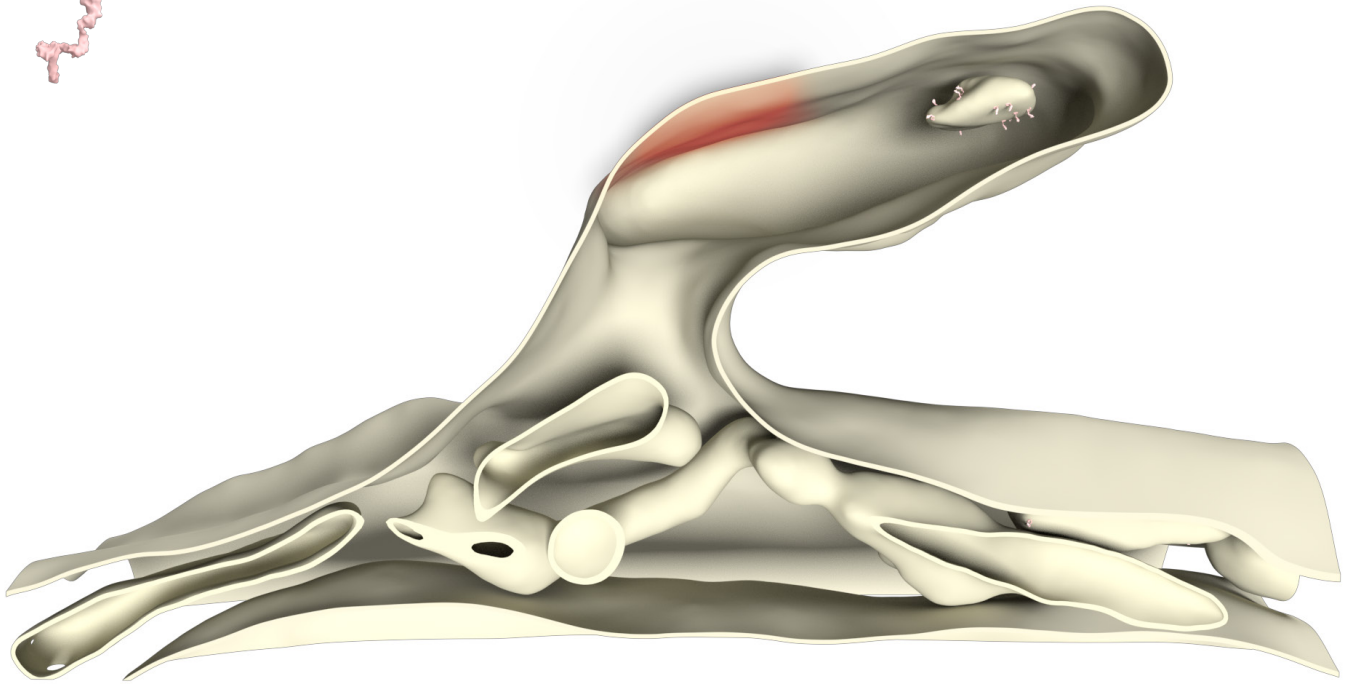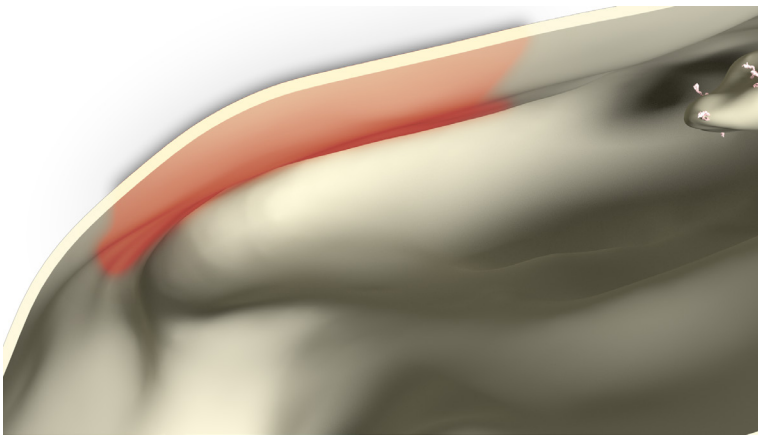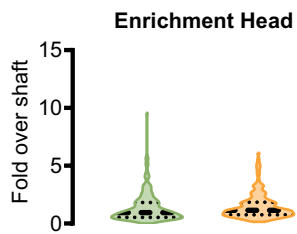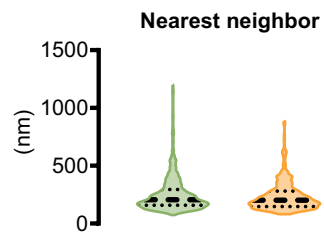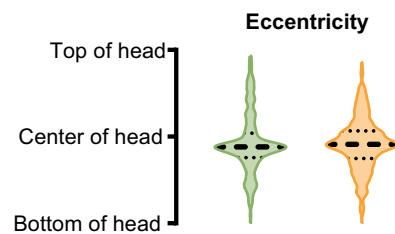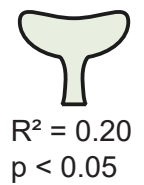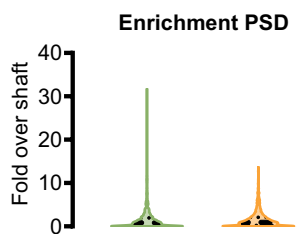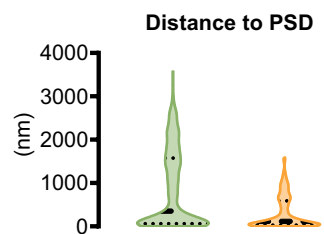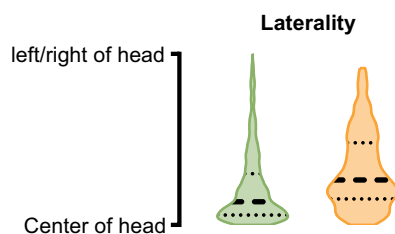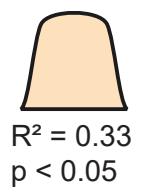

|          | Spine copy number | % of total protein | Molarity ( $\mu\text{M}$ ) | PSD copy number |
|----------|-------------------|--------------------|----------------------------|-----------------|
| Mushroom | $45.7 \pm 11.0$   | $0.0 \pm 0.0\%$    | $0.6 \pm 0.1$              | $0 \pm 0.0$     |
| Stubby   | $68.0 \pm 16.4$   | $0.0 \pm 0.0\%$    | $0.6 \pm 0.2$              | $0 \pm 0.0$     |

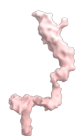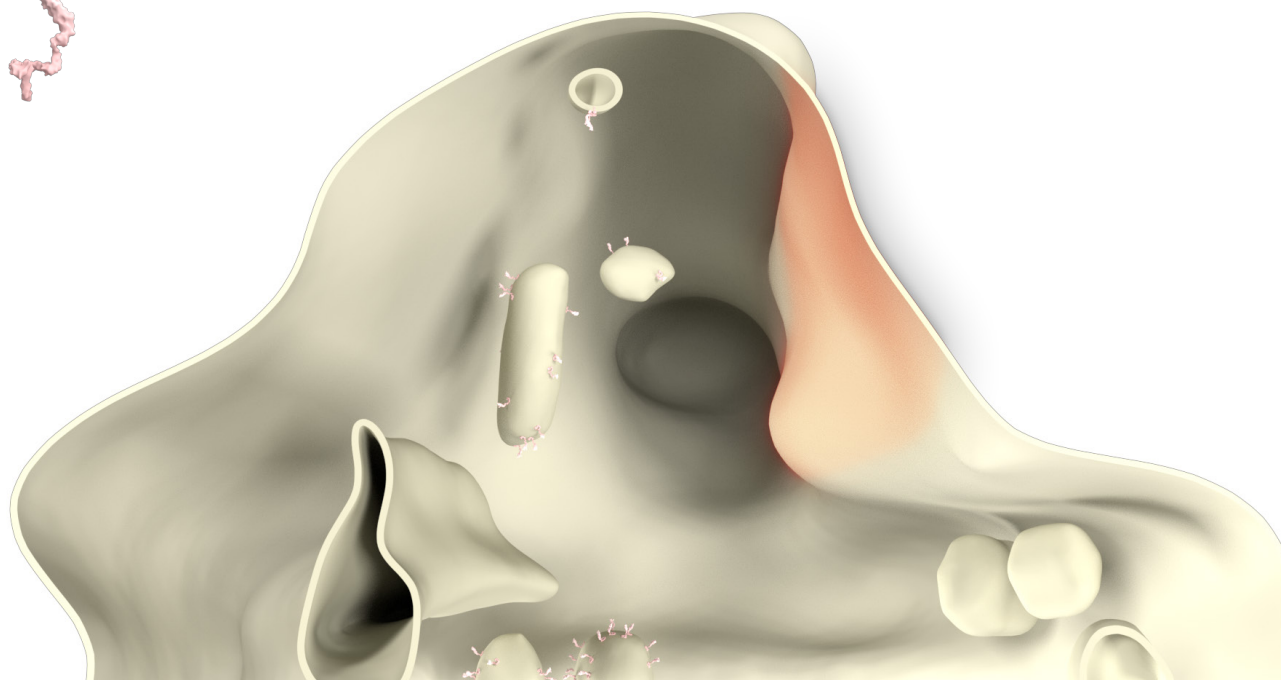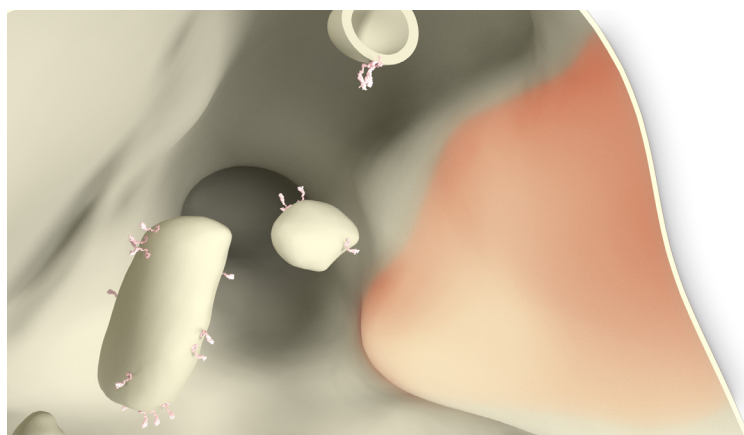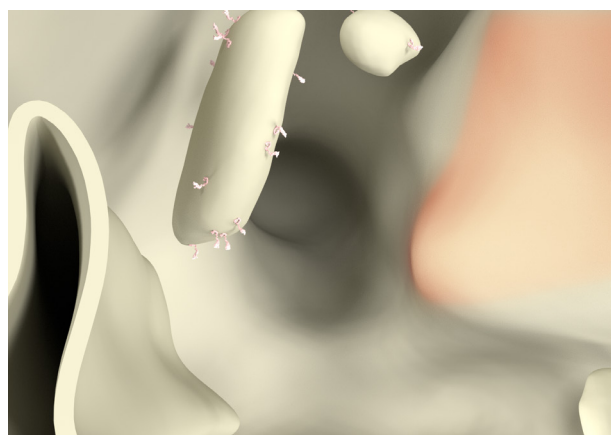

## References

**Antibody:** Synaptic Systems 110 162

**PDB Identifier:** modified Syntaxin1

### Literature:

Amessou et al., 2007, J. Cell. Sci.

Antonin et al., 2002, J. Biol. Chem.

Brandhorst et al., 2006, Proc. Natl. Acad. Sci. U S A

Chua and Tang, 2008, Mol. Membr. Biol.

Fischer von Mollard and Stevens, 1998, J. Biol.

Chem.

Ganley et al., 2008, J. Cell. Biol.

Mallard et al., 2002, J. Cell. Biol.

McBride et al., 1999, Cell

Shitara et al., 2013, Mol. Cell. Biochem.

Simonsen et al., 1998, Eur. J. Cell Biol.

Tang et al., 1998, Biochem. Biophys. Res. Commun.

Tang, 2008, Biochim. Biophys. Acta.

Zwilling et al., 2007, EMBO J.



Transferrin receptor (Gene: Tfrc , Uniprot ID: Q99376)

**Known function:** Iron uptake

**Known organization:** Homodimerizes, on PM and endosomes

**Known Interactions:** None

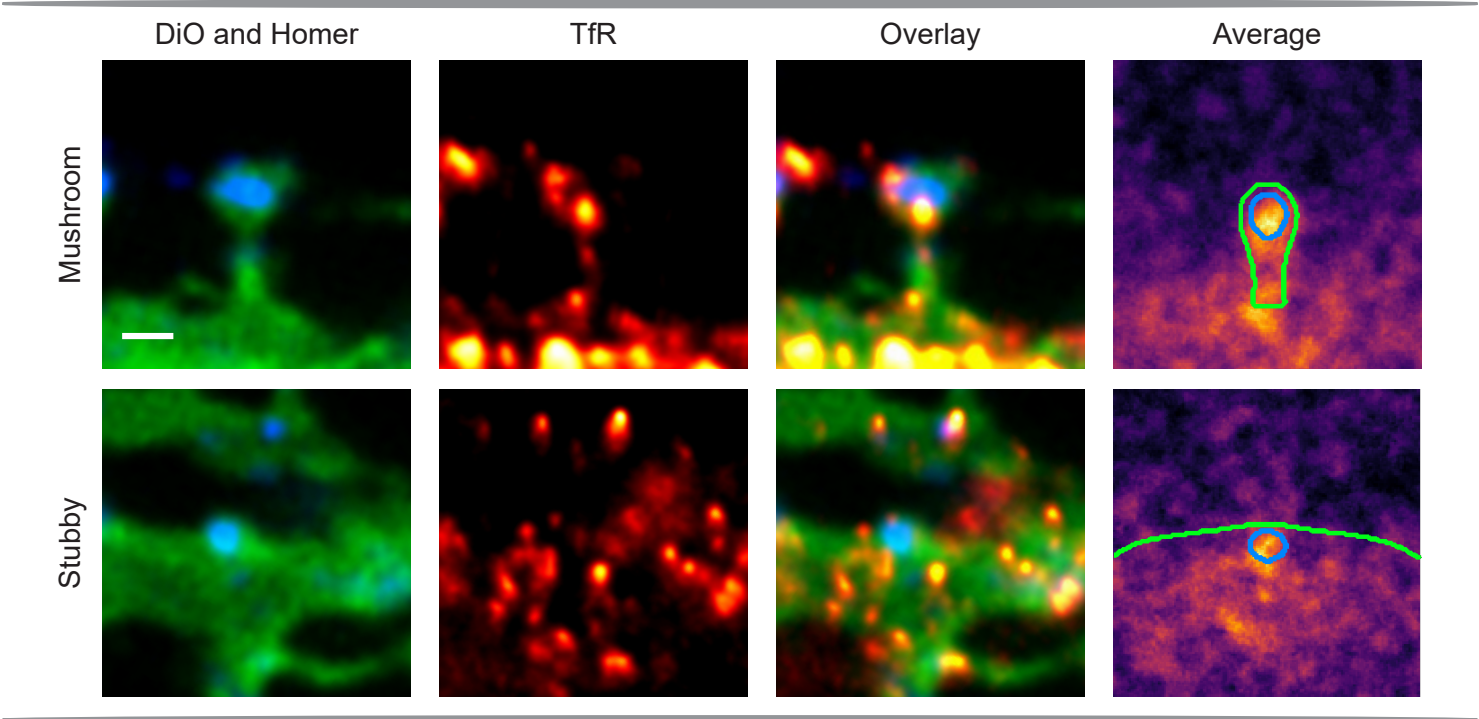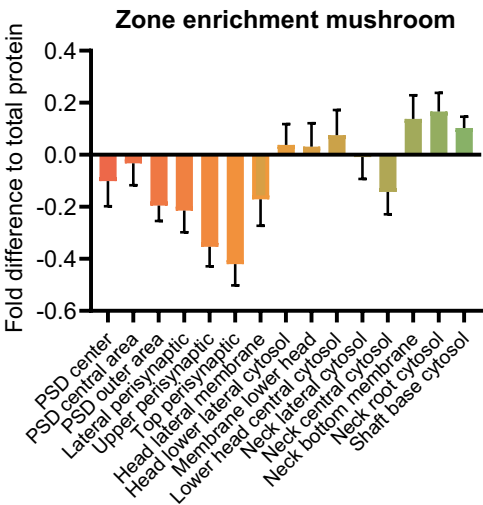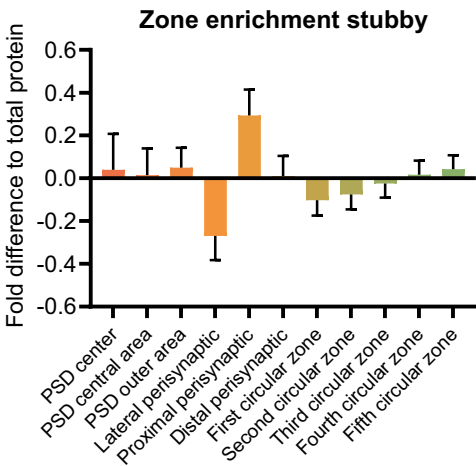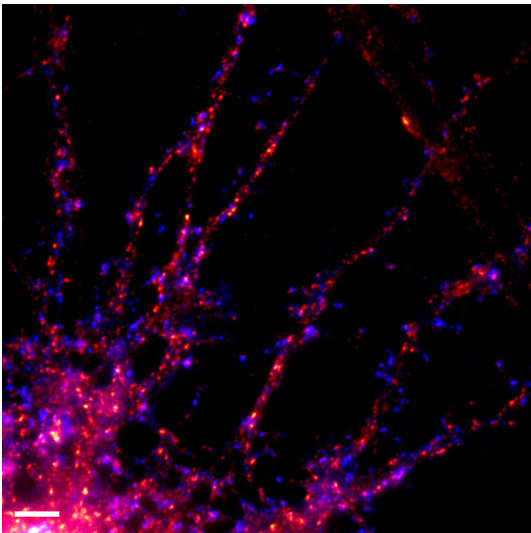

|                        |                            |              |
|------------------------|----------------------------|--------------|
| Whole cell copy number | 840751.3 ± 93924.9         |              |
| Spine copy number      | 397.5 ± 79.4               |              |
| Function               | Exo-/Endocytosis cofactors |              |
|                        | Mushroom                   | Stubby       |
| Spine copy number      | 368.3 ± 73.6               | 419.3 ± 83.8 |
| % of total protein     | 0.2 ± 0.0%                 | 0.2 ± 0.0%   |
| Molarity (µM)          | 4.7 ± 0.9                  | 4.0 ± 0.8    |
| PSD copy number        | 53 ± 10.6                  | 63 ± 12.6    |
| % in PSD               | 14.4 ± 2.9%                | 15.0 ± 3.0%  |

|          | Spine copy number | % of total protein | Molarity ( $\mu\text{M}$ ) | PSD copy number |
|----------|-------------------|--------------------|----------------------------|-----------------|
| Mushroom | $368.3 \pm 73.6$  | $0.2 \pm 0.0\%$    | $4.7 \pm 0.9$              | $53 \pm 10.6$   |
| Stubby   | $419.3 \pm 83.8$  | $0.2 \pm 0.0\%$    | $4.0 \pm 0.8$              | $63 \pm 12.6$   |

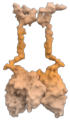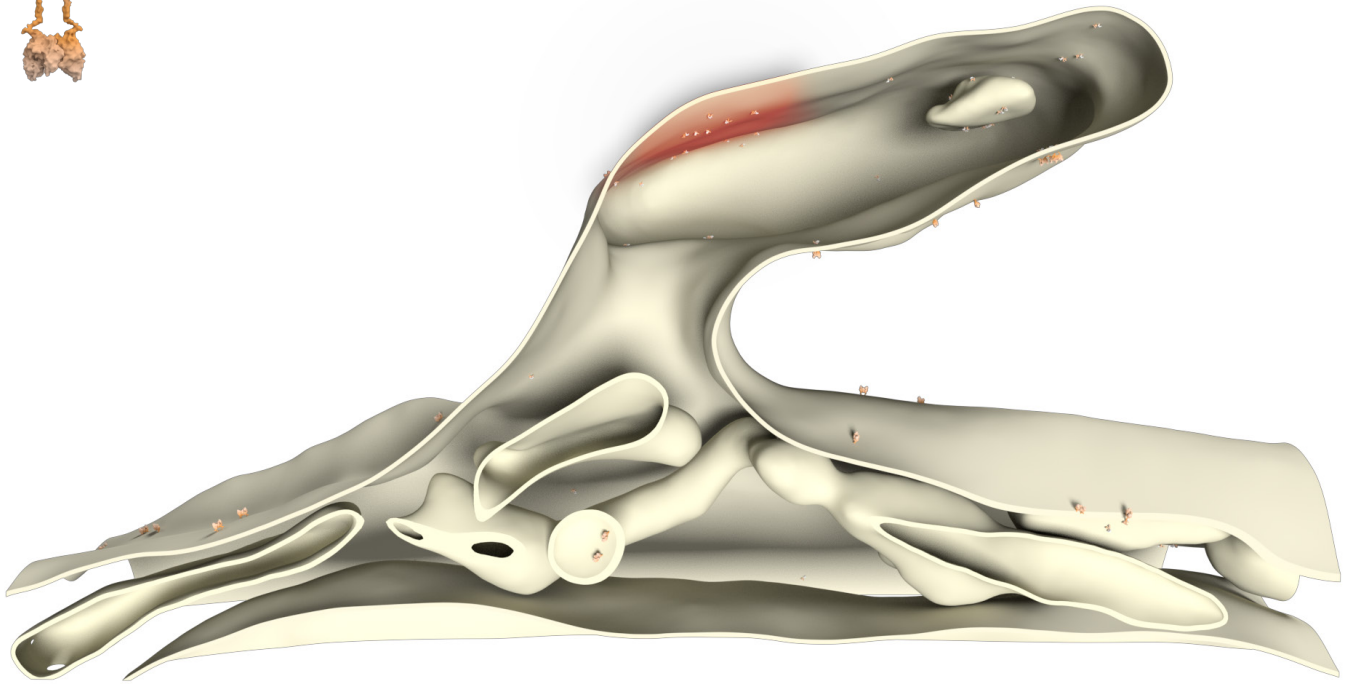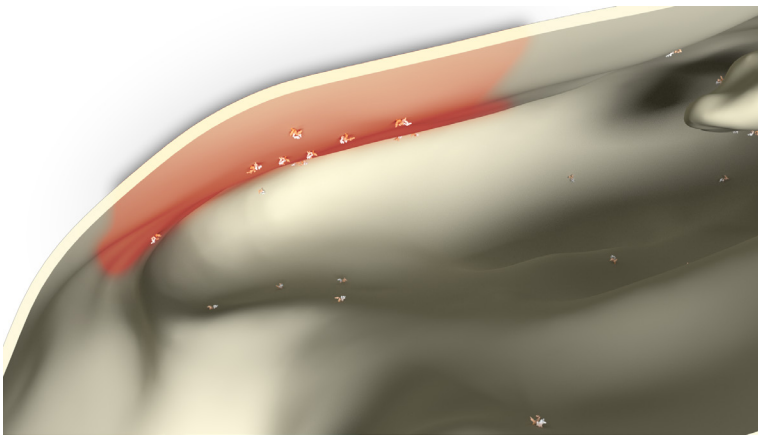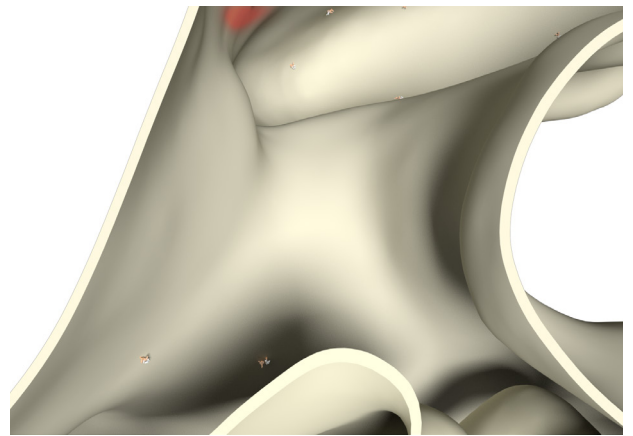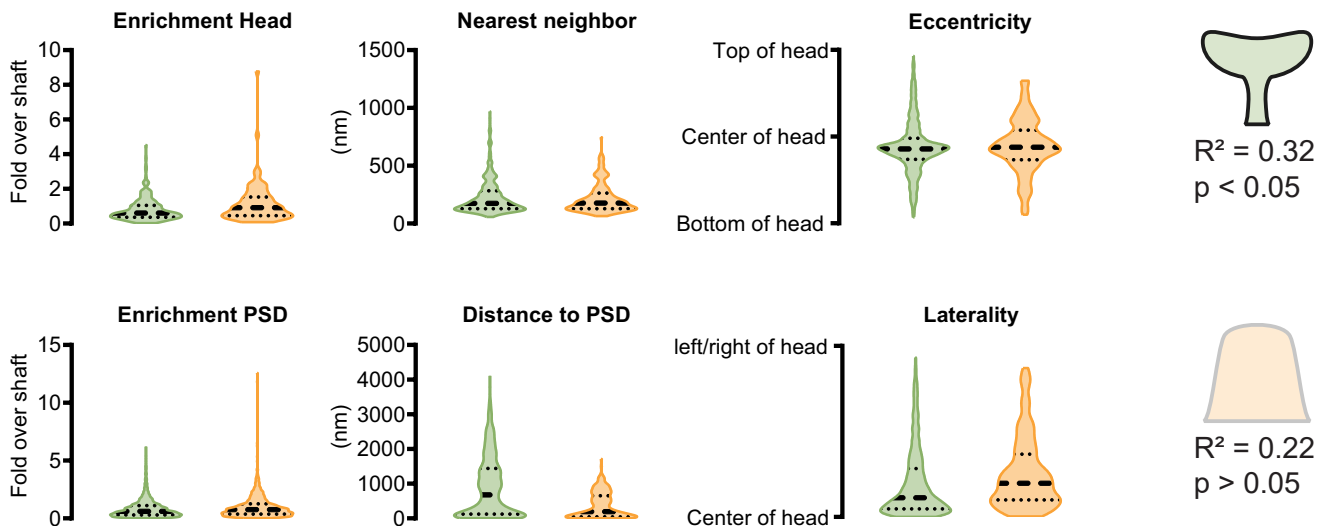

|          | Spine copy number | % of total protein | Molarity ( $\mu\text{M}$ ) | PSD copy number |
|----------|-------------------|--------------------|----------------------------|-----------------|
| Mushroom | $368.3 \pm 73.6$  | $0.2 \pm 0.0\%$    | $4.7 \pm 0.9$              | $53 \pm 10.6$   |
| Stubby   | $419.3 \pm 83.8$  | $0.2 \pm 0.0\%$    | $4.0 \pm 0.8$              | $63 \pm 12.6$   |

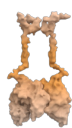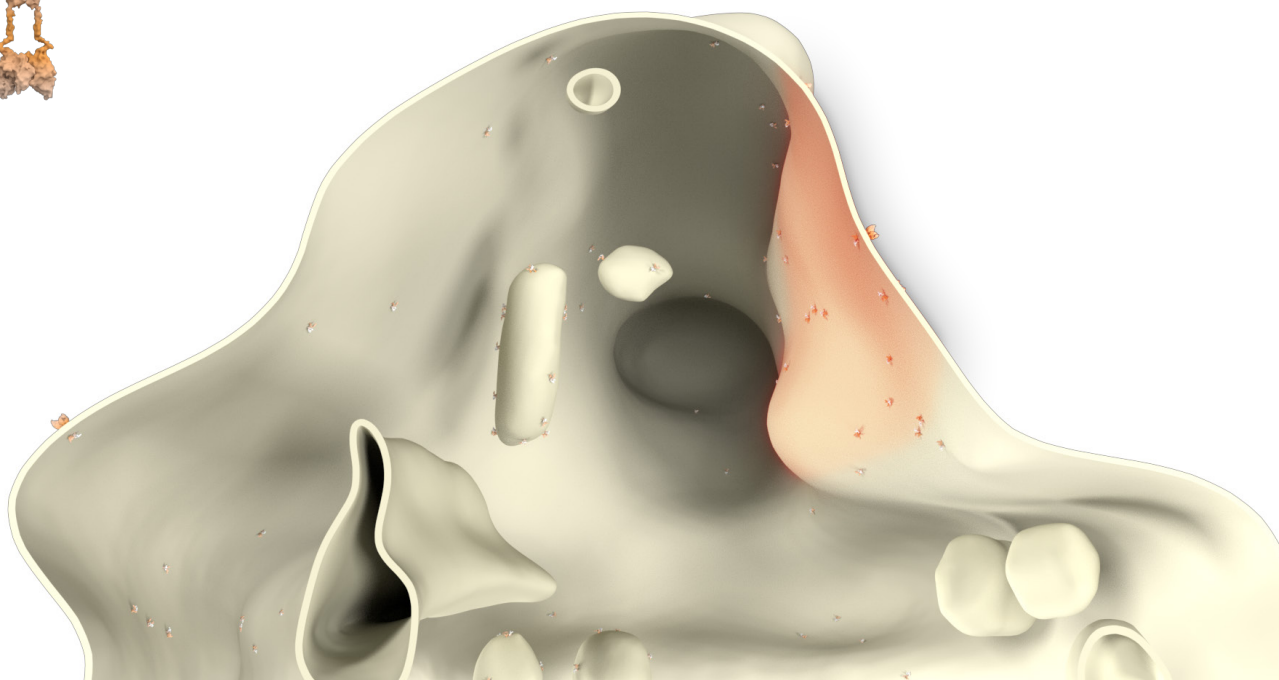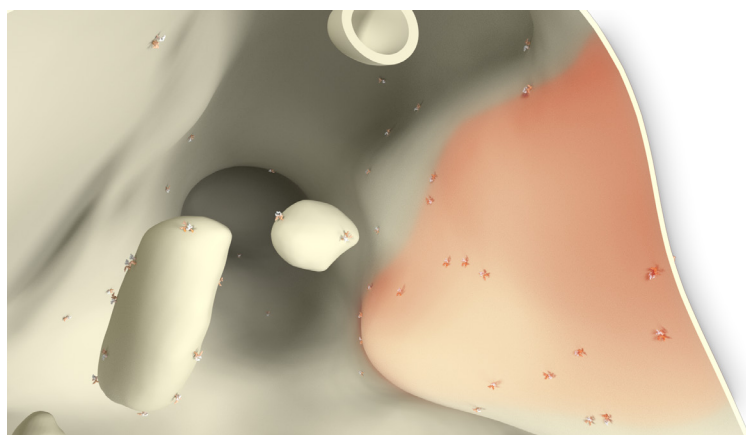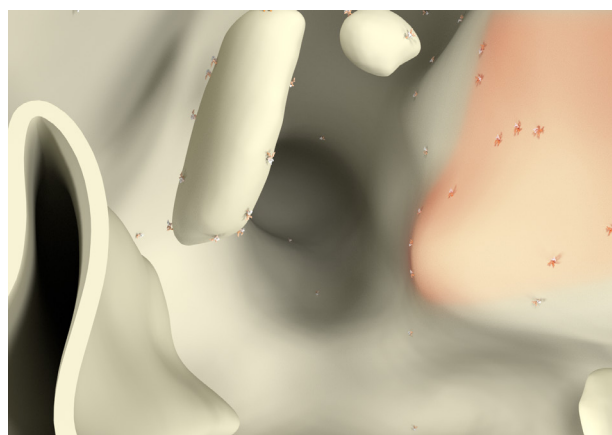

## References

**Antibody:** Abcam ab84036

**PDB Identifier:** 2nsu, 3s9n

### Literature:

Chi et al., 2006, J. Proteome Res.

Qian et al., 2002, Pharmacol. Rev.

Rothenberger et al., 1987, Cell



## TGN38 (Gene: Ttgn1, Uniprot ID: P19814)

**Known function:** TGN-PM cycling

**Known organization:** Transmembrane protein, TGN

**Known Interactions:** None

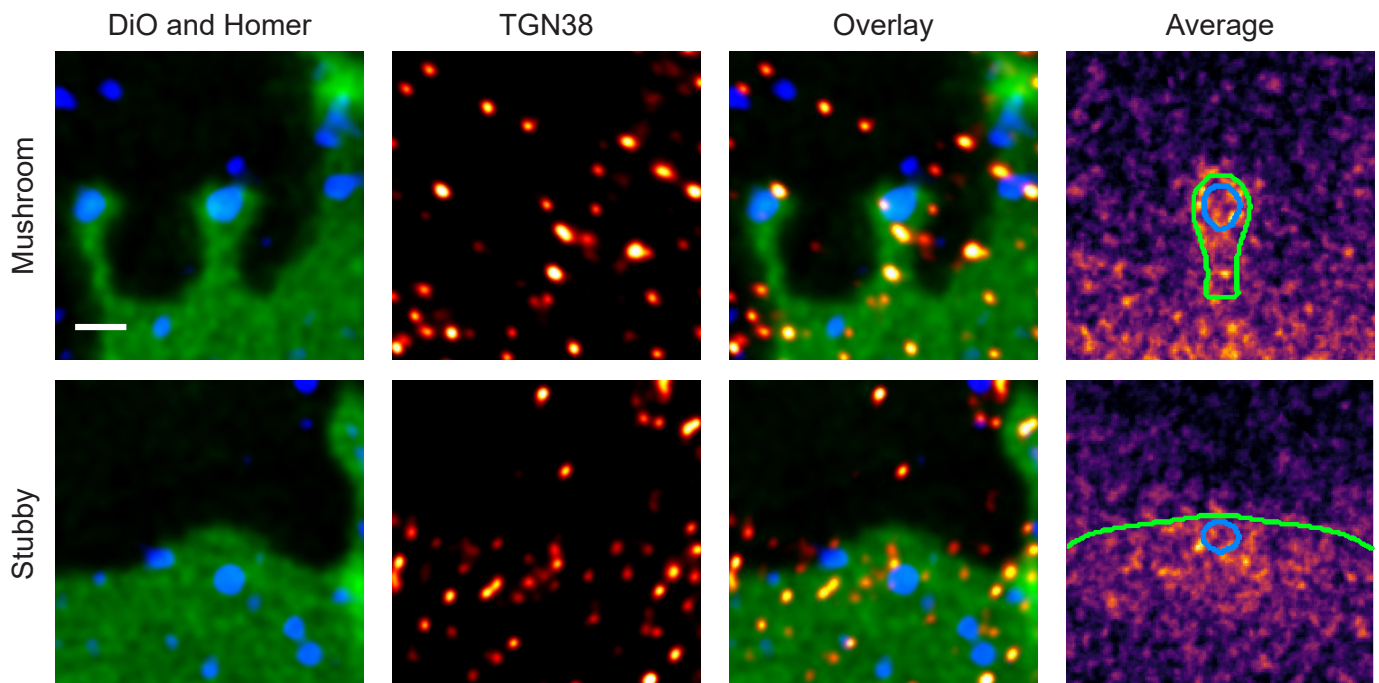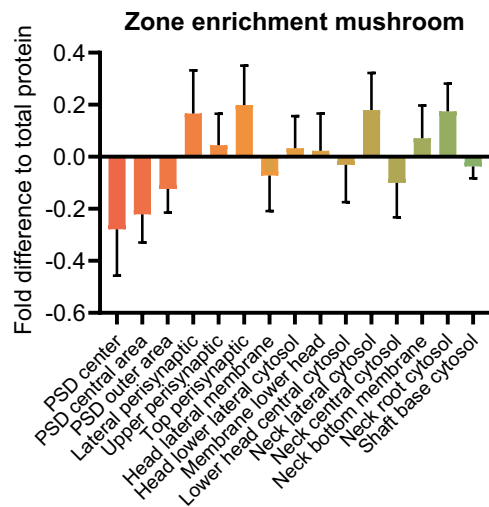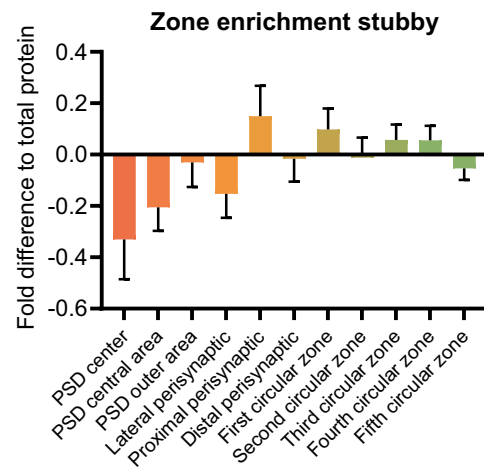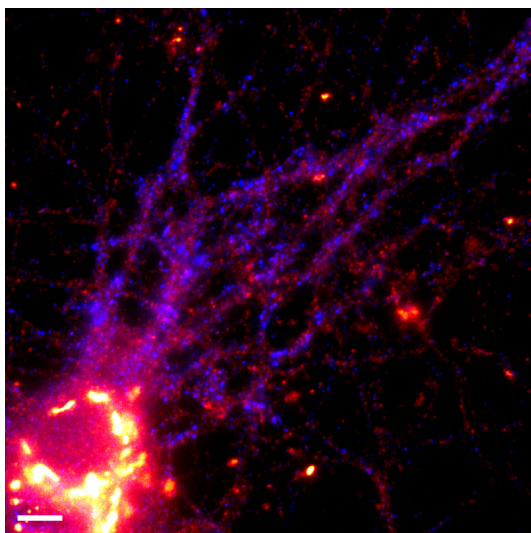

|                        |                  |            |
|------------------------|------------------|------------|
| Whole cell copy number | 63527.0 ± 8730.4 |            |
| Spine copy number      | 1.4 ± 1.7        |            |
| Function               | Organelle        |            |
|                        | Mushroom         | Stubby     |
| Spine copy number      | 1.2 ± 1.4        | 1.6 ± 1.9  |
| % of total protein     | 0.0 ± 0.0%       | 0.0 ± 0.0% |
| Molarity (μM)          | 0.0 ± 0.0        | 0.0 ± 0.0  |
| PSD copy number        | 0 ± 0.0          | 0 ± 0.0    |
| % in PSD               | 0.0 ± 0.0%       | 0.0 ± 0.0% |

|          | Spine copy number | % of total protein | Molarity ( $\mu\text{M}$ ) | PSD copy number |
|----------|-------------------|--------------------|----------------------------|-----------------|
| Mushroom | $1.2 \pm 1.4$     | $0.0 \pm 0.0\%$    | $0.0 \pm 0.0$              | $0 \pm 0.0$     |
| Stubby   | $1.6 \pm 1.9$     | $0.0 \pm 0.0\%$    | $0.0 \pm 0.0$              | $0 \pm 0.0$     |

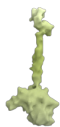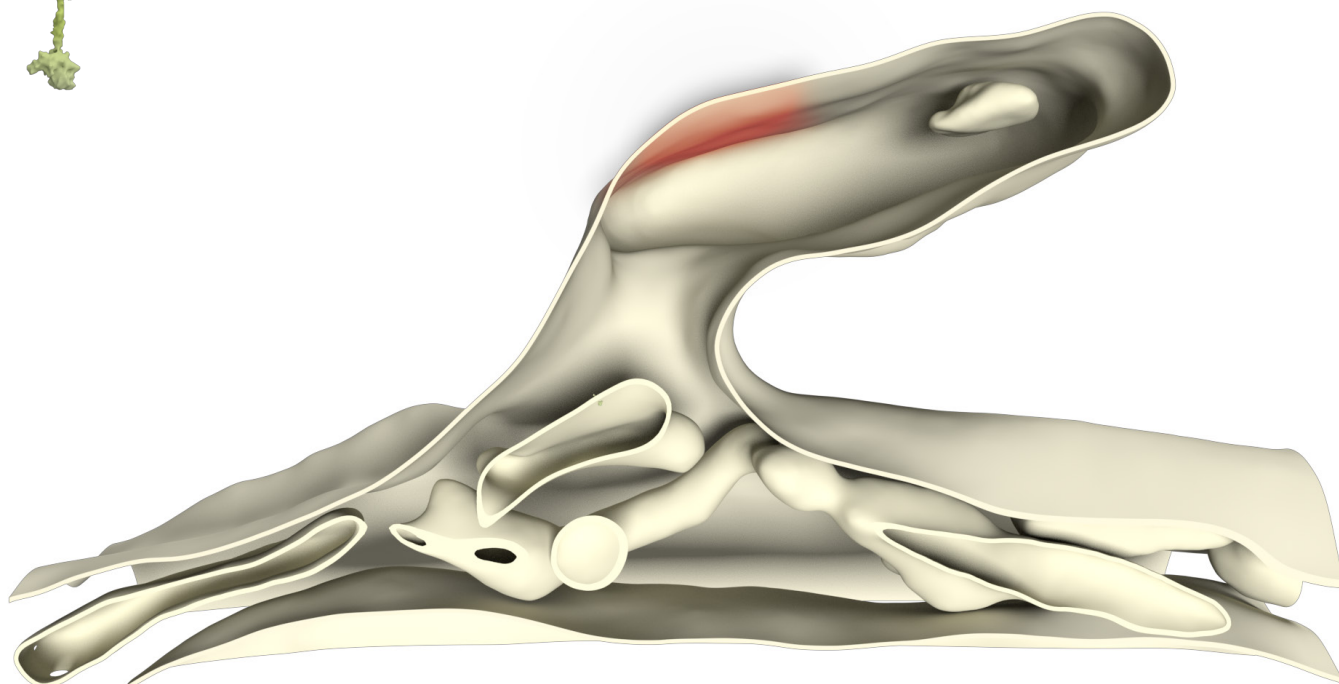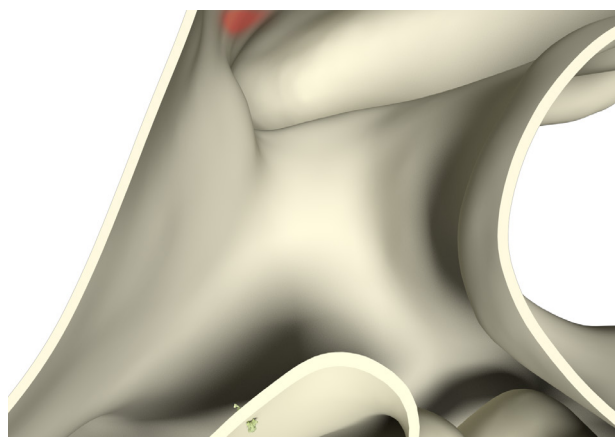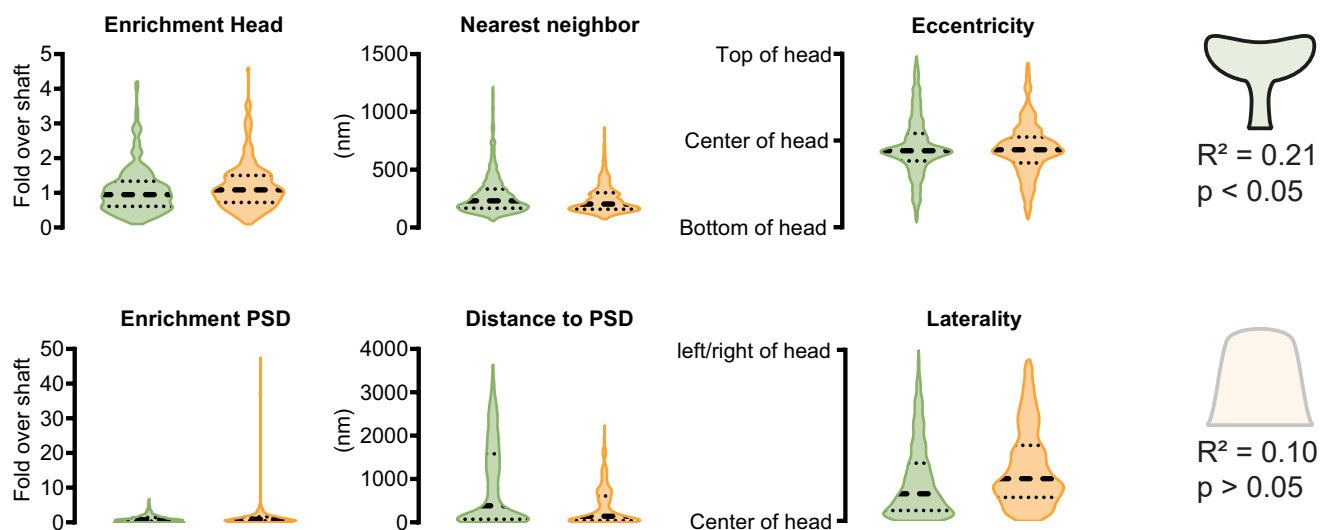

|          | Spine copy number | % of total protein | Molarity ( $\mu\text{M}$ ) | PSD copy number |
|----------|-------------------|--------------------|----------------------------|-----------------|
| Mushroom | $1.2 \pm 1.4$     | $0.0 \pm 0.0\%$    | $0.0 \pm 0.0$              | $0 \pm 0.0$     |
| Stubby   | $1.6 \pm 1.9$     | $0.0 \pm 0.0\%$    | $0.0 \pm 0.0$              | $0 \pm 0.0$     |

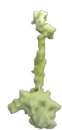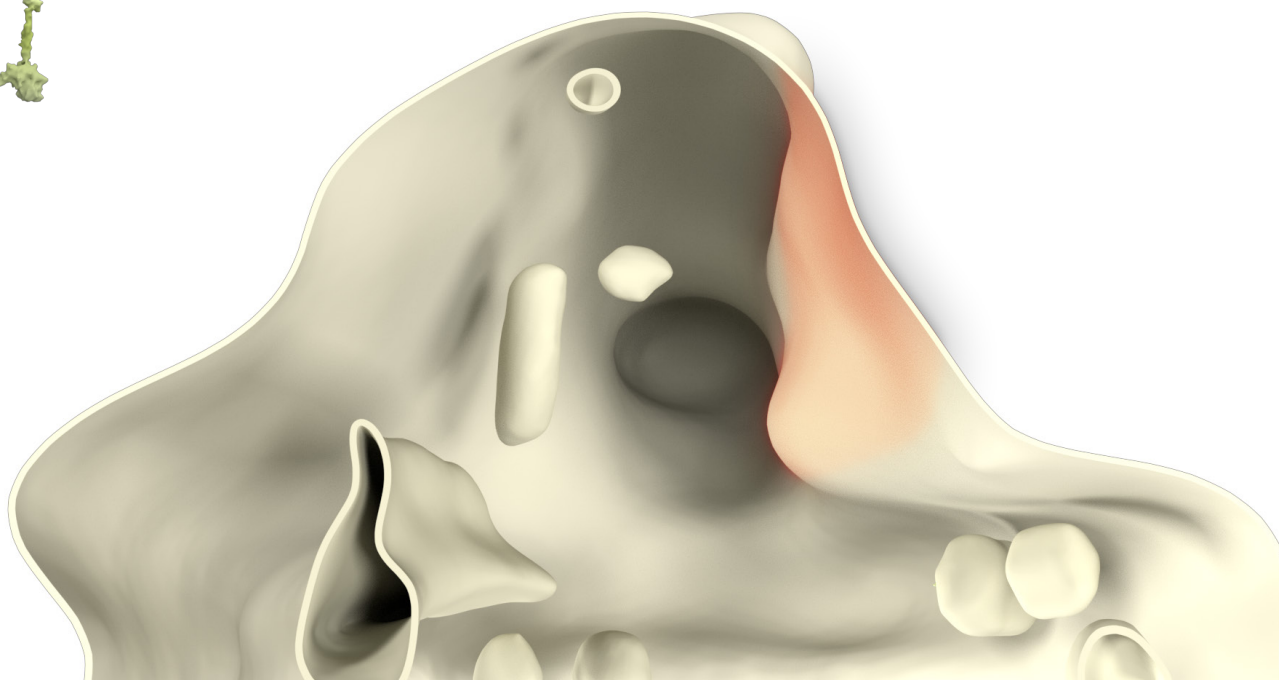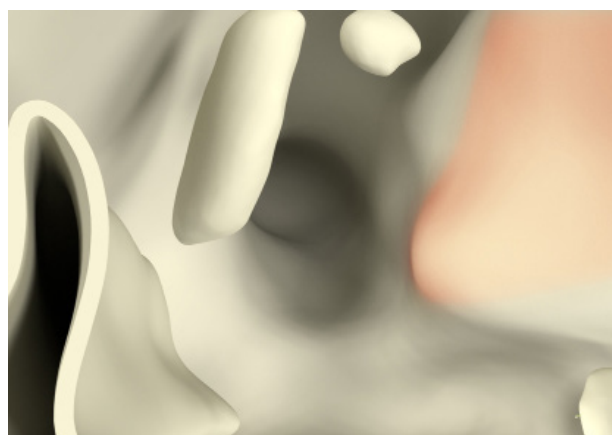

## References

**Antibody:** Sigma Aldrich T9826

### Literature:

Gardiol et al., 1999, J. Neurosci.

Luzio et al., 1990, Biochem. J.

Reaves et al., 1993, Mol. Biol. Cell.

**Structure:** Modelled with I-TASSER



## TOM20 (Gene: Tomm20, Uniprot ID: Q62760)

**Known function:** Part of the translocase of the outer mitochondrial membrane, Recognizes presequence of preproteins

**Known organization:** Transmembrane protein, Mitochondrion, Forms clusters

**Known Interactions:** None

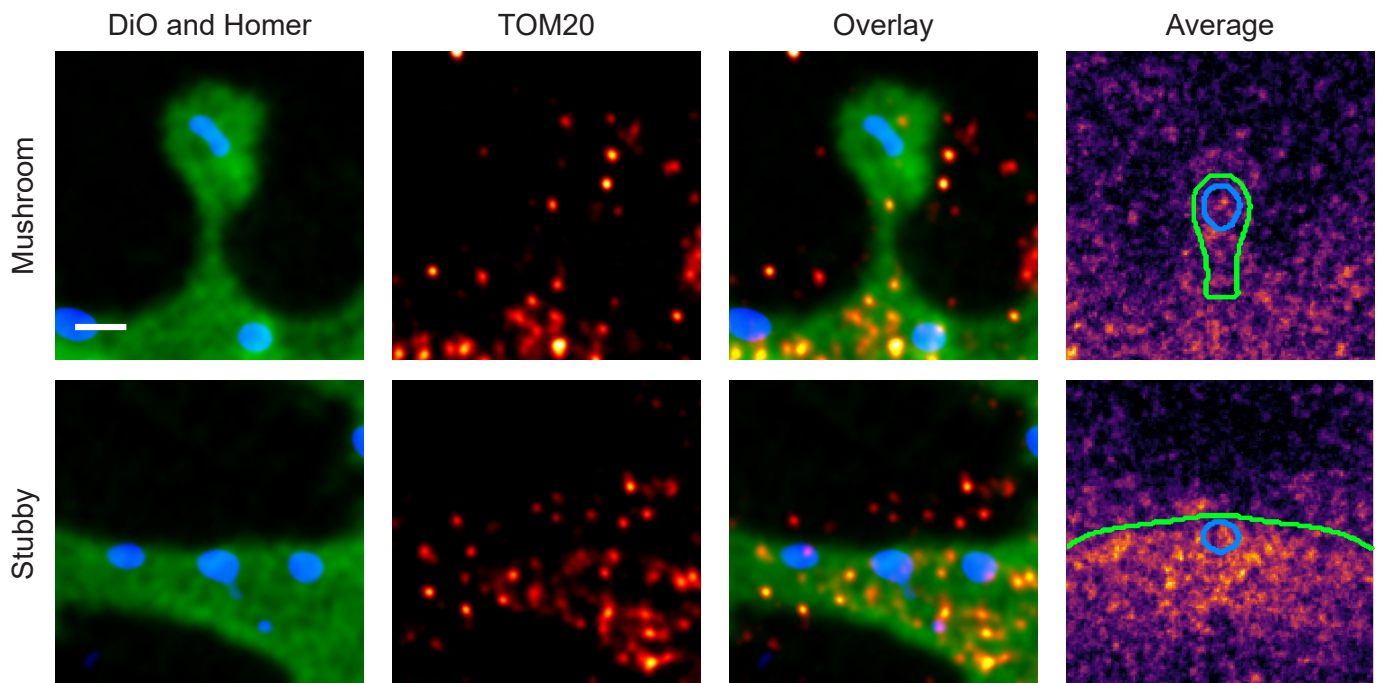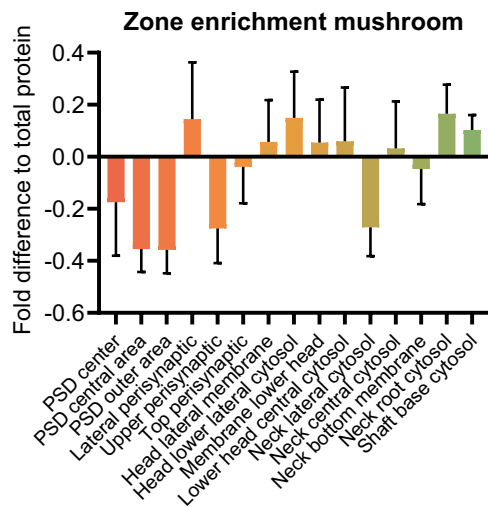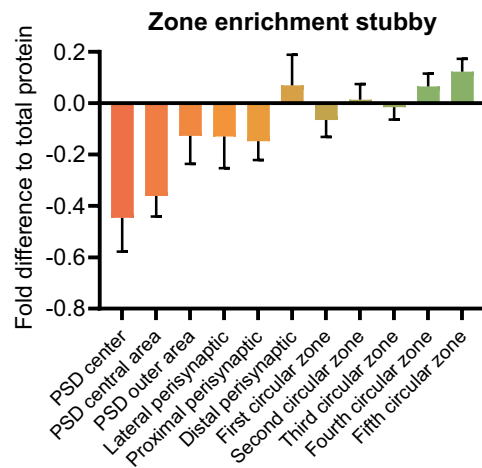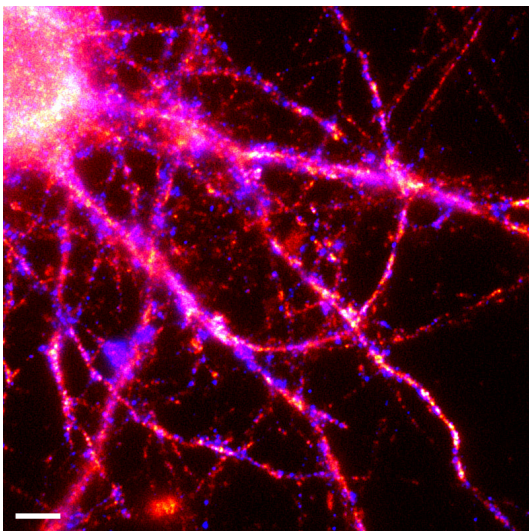

|                        |                       |               |
|------------------------|-----------------------|---------------|
| Whole cell copy number | 5717233.5 ± 1289921.8 |               |
| Spine copy number      | 406.8 ± 224.3         |               |
| Function               | Organelle             |               |
|                        | Mushroom              | Stubby        |
| Spine copy number      | 281.6 ± 155.3         | 544.3 ± 300.1 |
| % of total protein     | 0.0 ± 0.0%            | 0.0 ± 0.0%    |
| Molarity (μM)          | 3.6 ± 2.0             | 5.1 ± 2.8     |
| PSD copy number        | 0 ± 0.0               | 0 ± 0.0       |
| % in PSD               | 0.0 ± 0.0%            | 0.0 ± 0.0%    |

|          | Spine copy number | % of total protein | Molarity ( $\mu\text{M}$ ) | PSD copy number |
|----------|-------------------|--------------------|----------------------------|-----------------|
| Mushroom | $281.6 \pm 155.3$ | $0.0 \pm 0.0\%$    | $3.6 \pm 2.0$              | $0 \pm 0.0$     |
| Stubby   | $544.3 \pm 300.1$ | $0.0 \pm 0.0\%$    | $5.1 \pm 2.8$              | $0 \pm 0.0$     |

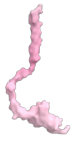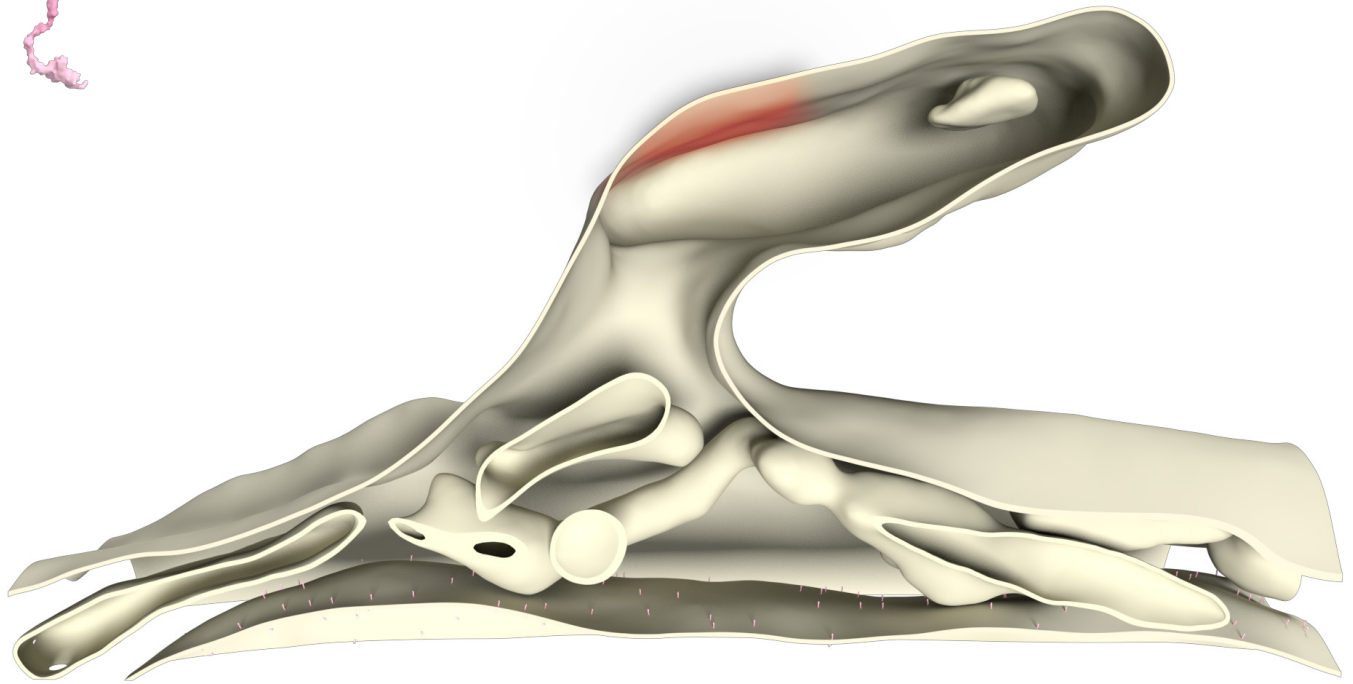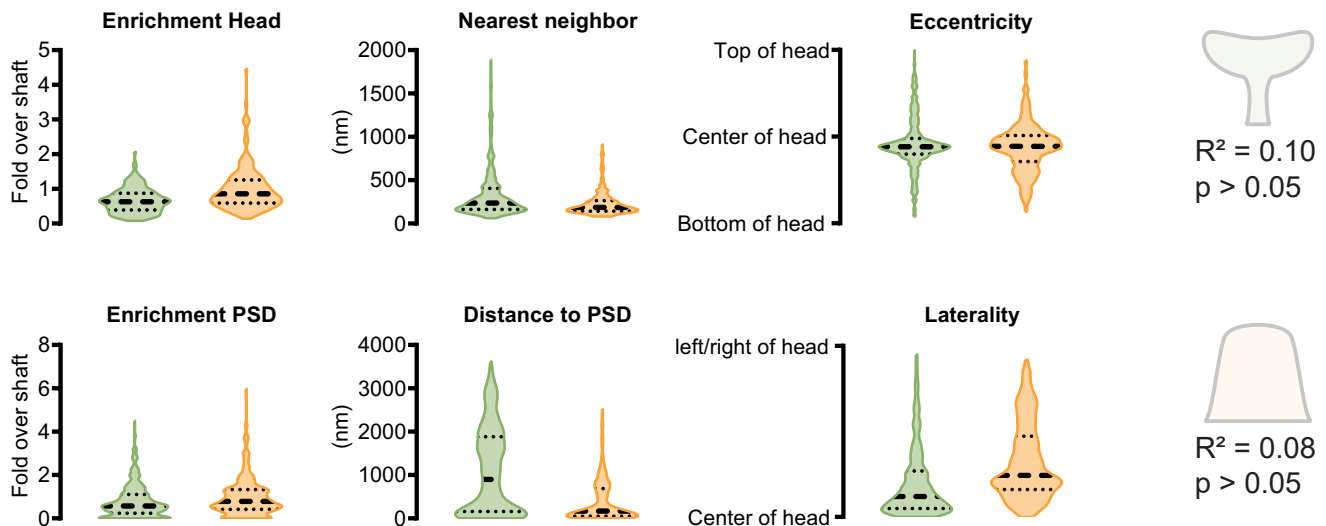

|          | Spine copy number | % of total protein | Molarity ( $\mu\text{M}$ ) | PSD copy number |
|----------|-------------------|--------------------|----------------------------|-----------------|
| Mushroom | $281.6 \pm 155.3$ | $0.0 \pm 0.0\%$    | $3.6 \pm 2.0$              | $0 \pm 0.0$     |
| Stubby   | $544.3 \pm 300.1$ | $0.0 \pm 0.0\%$    | $5.1 \pm 2.8$              | $0 \pm 0.0$     |

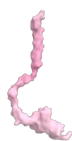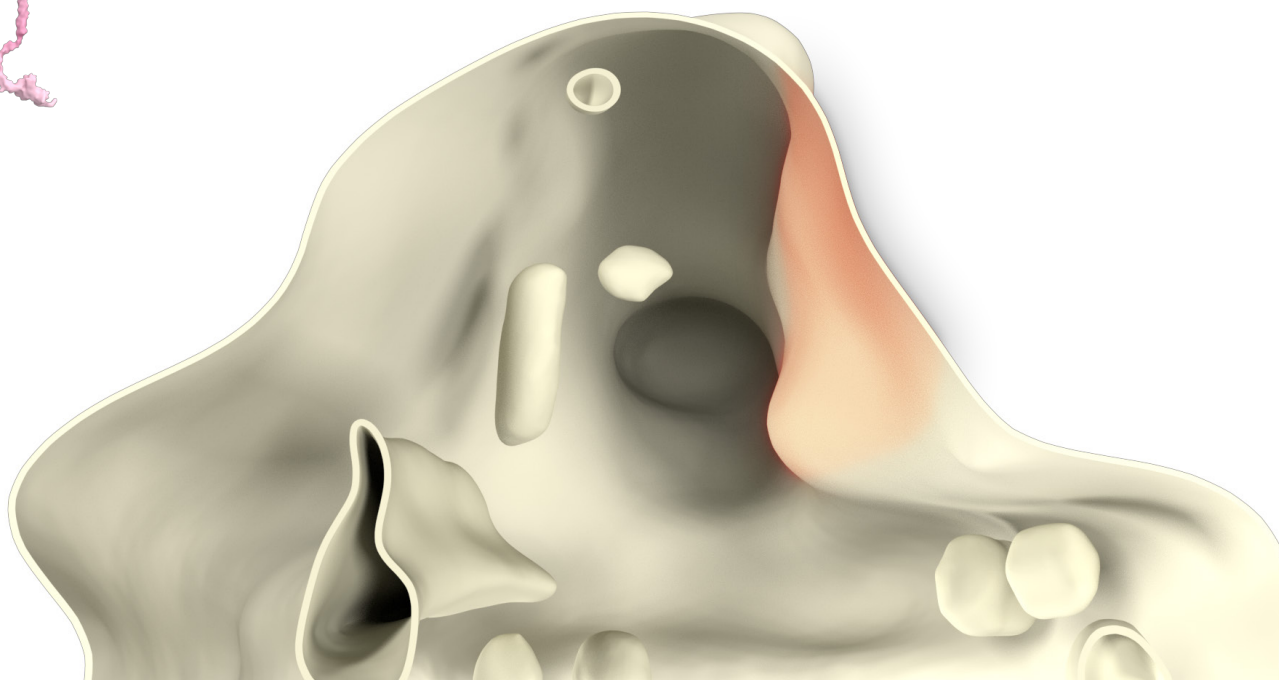

## References

**Antibody:** Sigma Aldrich WH0009804M1

**PDB Identifier:** 1om2

### Literature:

Donnert et al., 2007, Biophys. J.

Saitoh et al., 2007, EMBO J.

Söllner et al., 1989, Cell

Wurm et al., 2011, Proc. Natl. Acad. Sci. U S A



## TrkB (Gene: Ntrk2, Uniprot ID: Q63604)

**Known function:** Activates PI3K, PLC and MAP/ERK pathways, Important for dendritic growth, spine maturation and LTP

**Known organization:** Transmembrane protein, Forms small clusters

**Known Interactions:** BDNF, LNGFR

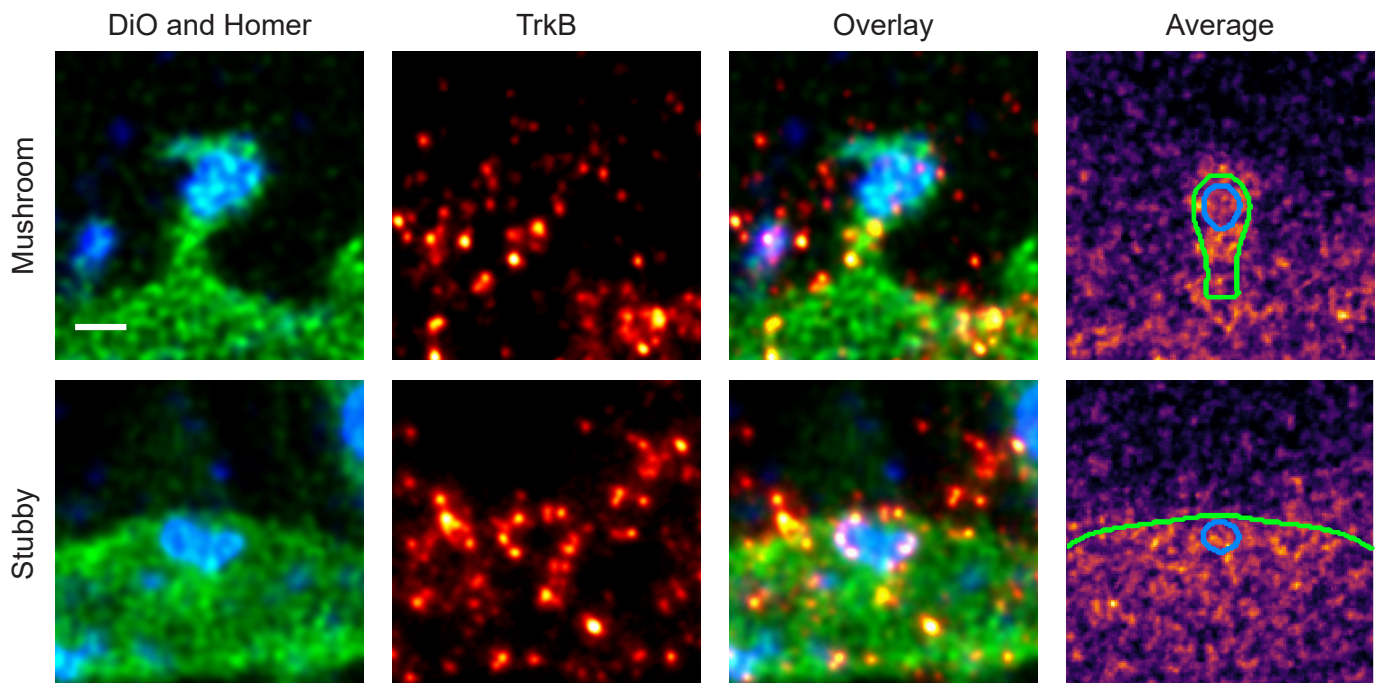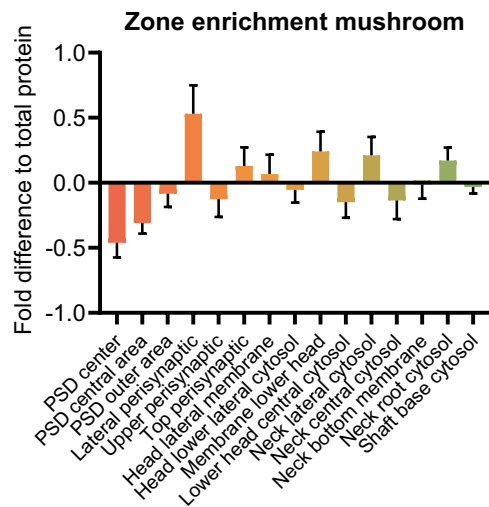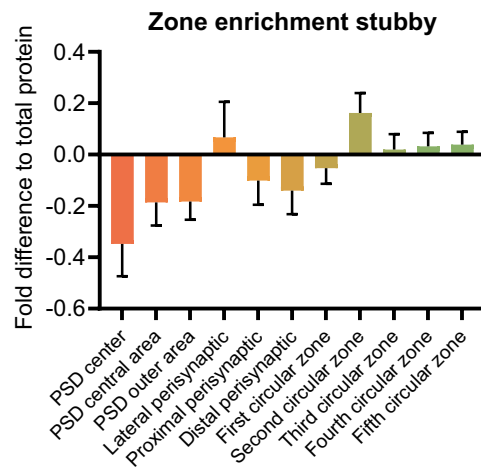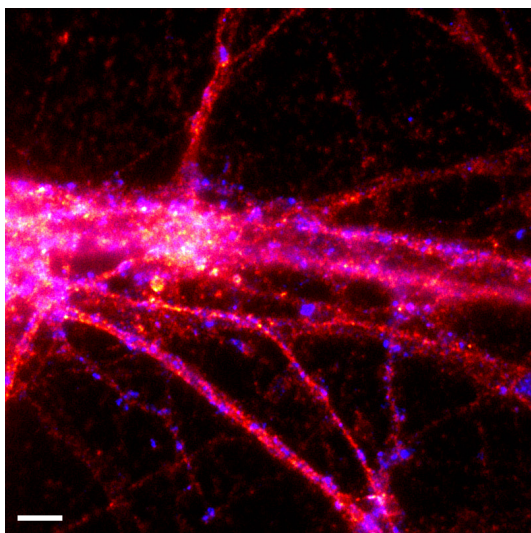

|                        |                    |              |
|------------------------|--------------------|--------------|
| Whole cell copy number | 117879.1 ± 32346.3 |              |
| Spine copy number      | 141.5 ± 52.9       |              |
| Function               | Receptor           |              |
|                        | Mushroom           | Stubby       |
| Spine copy number      | 124.3 ± 46.5       | 140.2 ± 52.4 |
| % of total protein     | 0.1 ± 0.0%         | 0.1 ± 0.0%   |
| Molarity (μM)          | 1.6 ± 0.6          | 1.3 ± 0.5    |
| PSD copy number        | 15 ± 5.6           | 14 ± 5.2     |
| % in PSD               | 12.1 ± 4.5%        | 10.0 ± 3.7%  |

|          | Spine copy number | % of total protein | Molarity ( $\mu\text{M}$ ) | PSD copy number |
|----------|-------------------|--------------------|----------------------------|-----------------|
| Mushroom | $124.3 \pm 46.5$  | $0.1 \pm 0.0\%$    | $1.6 \pm 0.6$              | $15 \pm 5.6$    |
| Stubby   | $140.2 \pm 52.4$  | $0.1 \pm 0.0\%$    | $1.3 \pm 0.5$              | $14 \pm 5.2$    |

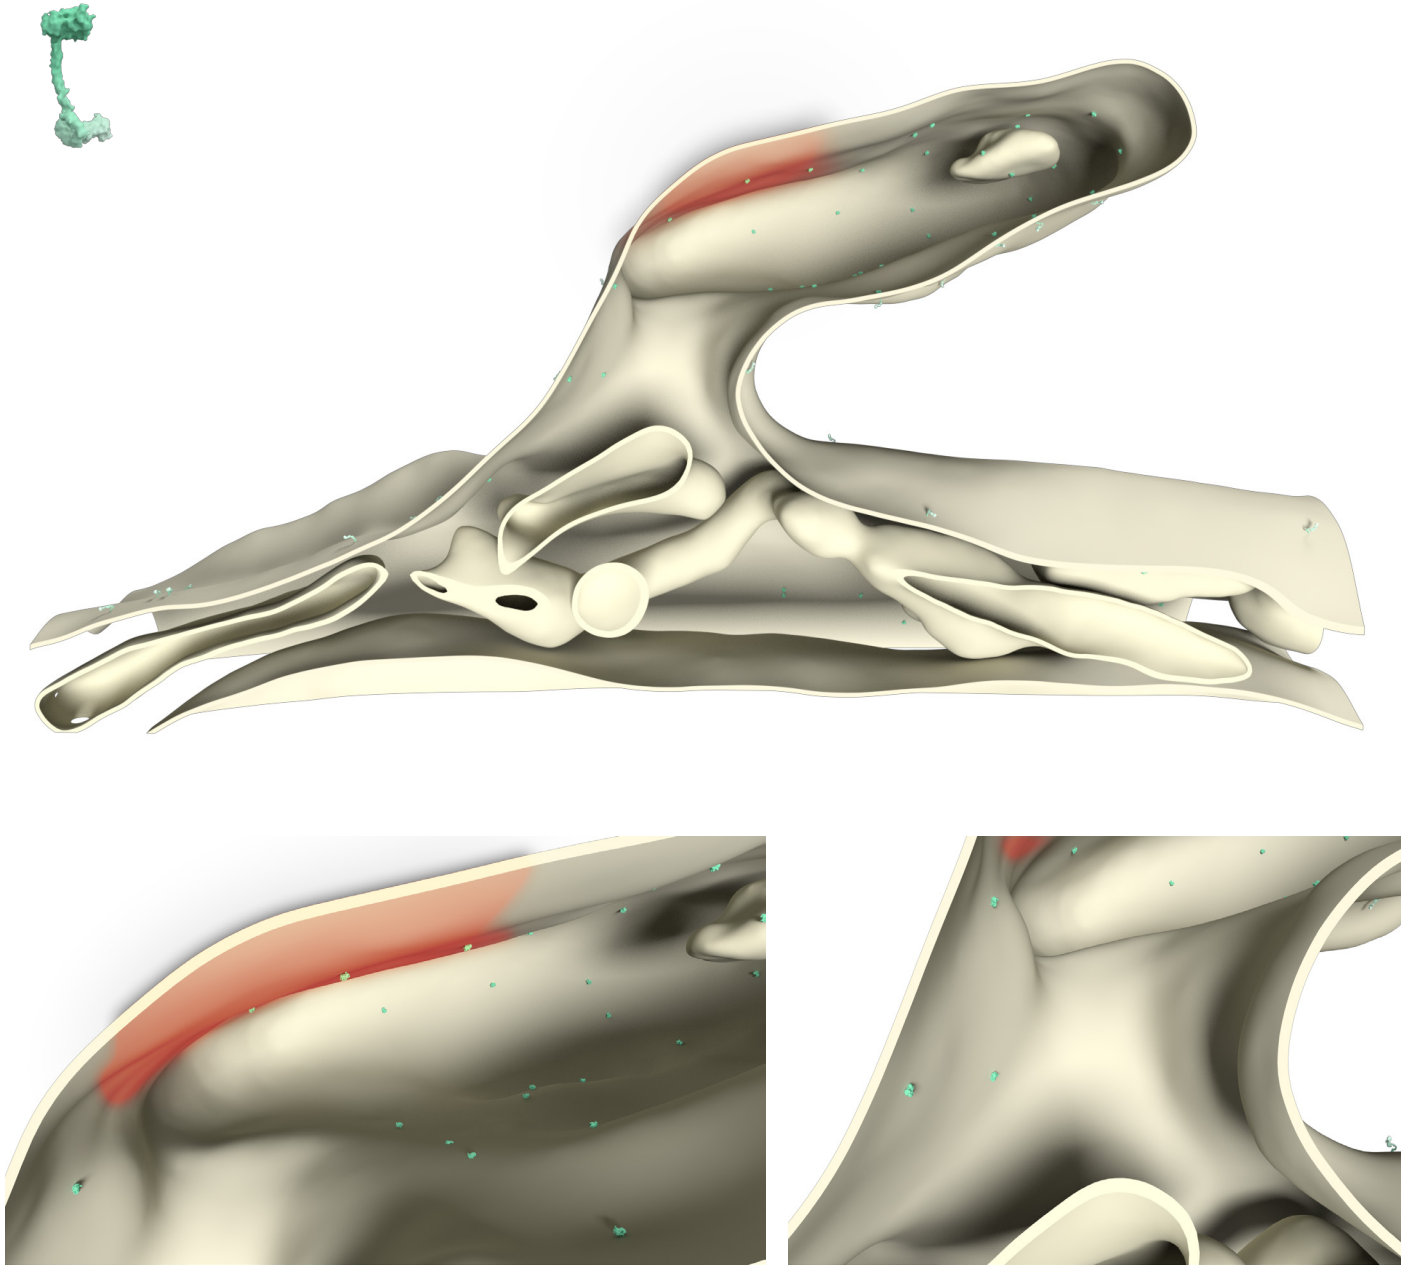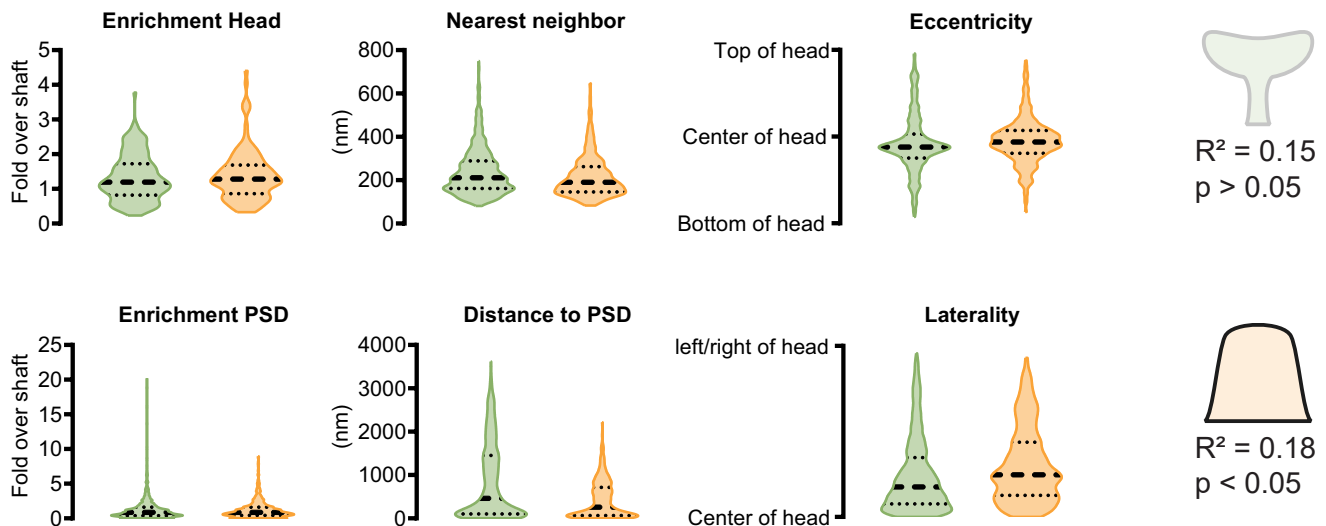

|          | Spine copy number | % of total protein | Molarity ( $\mu\text{M}$ ) | PSD copy number |
|----------|-------------------|--------------------|----------------------------|-----------------|
| Mushroom | $124.3 \pm 46.5$  | $0.1 \pm 0.0\%$    | $1.6 \pm 0.6$              | $15 \pm 5.6$    |
| Stubby   | $140.2 \pm 52.4$  | $0.1 \pm 0.0\%$    | $1.3 \pm 0.5$              | $14 \pm 5.2$    |

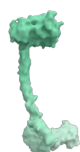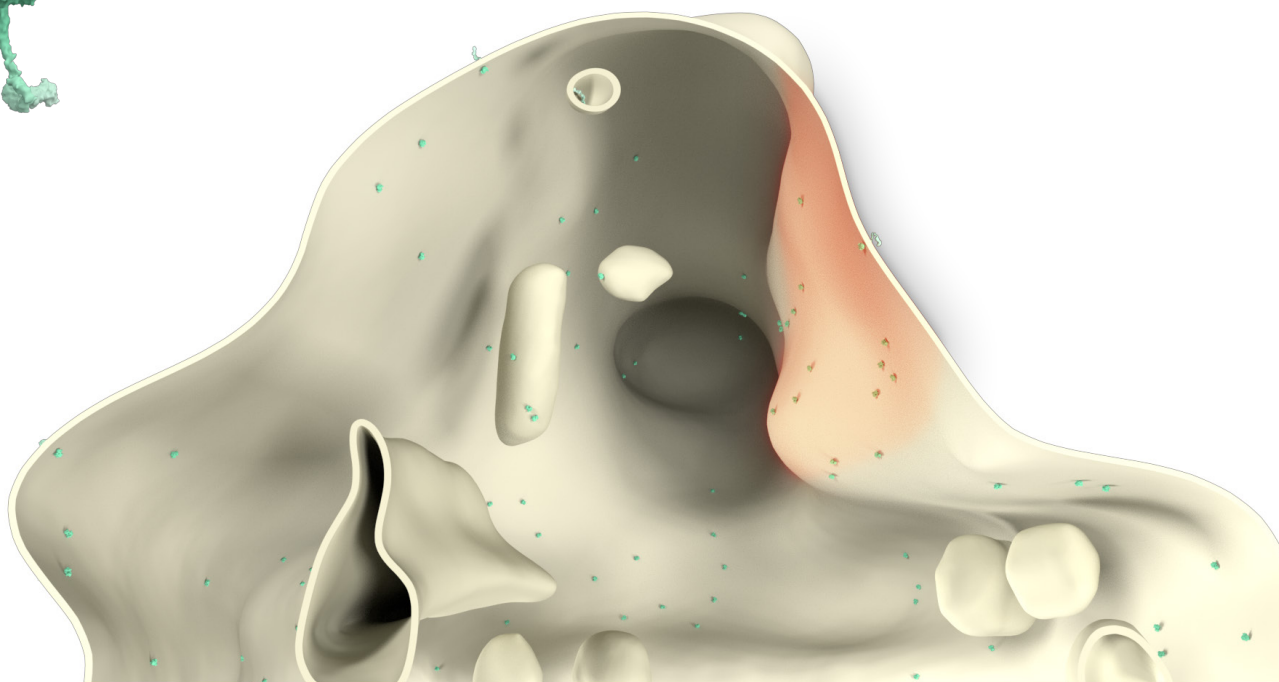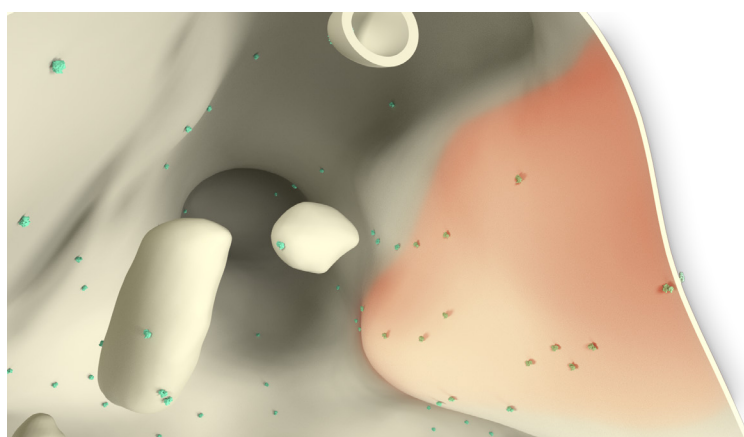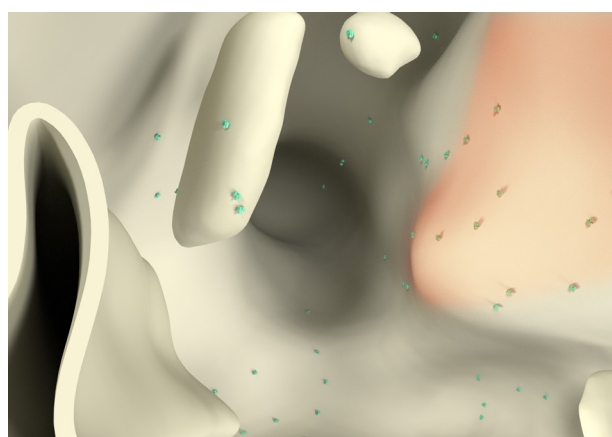

## References

**Antibody:** Abcam ab33655

**PDB Identifier:** 1hcf, 1www, 4asz

### Literature:

Angelov and Angelova, 2017, Nanoscale

Bibel et al., 1999, EMBO J.

Gomes et al., 2006, J. Neurosci.

Gorski et al., 2003, J. Neurosci.

Kang and Schuman, 1995, Science

Soppet et al., 1991, Cell

Tanaka et al., 1997, J. Neurosci.

Wirth et al., 2003, Development

Xu et al., 2000, J. Neurosci.



## VAMP1 (Synaptobrevin1, Gene: Vamp1, Uniprot ID: Q63666)

**Known function:** R-SNARE, SV release, Delivery of NMDAR to PM

**Known organization:** Transmembrane protein, On SV and secretory vesicles

**Known Interactions:** Syntaxin1, Syntaxin4, SNAP25

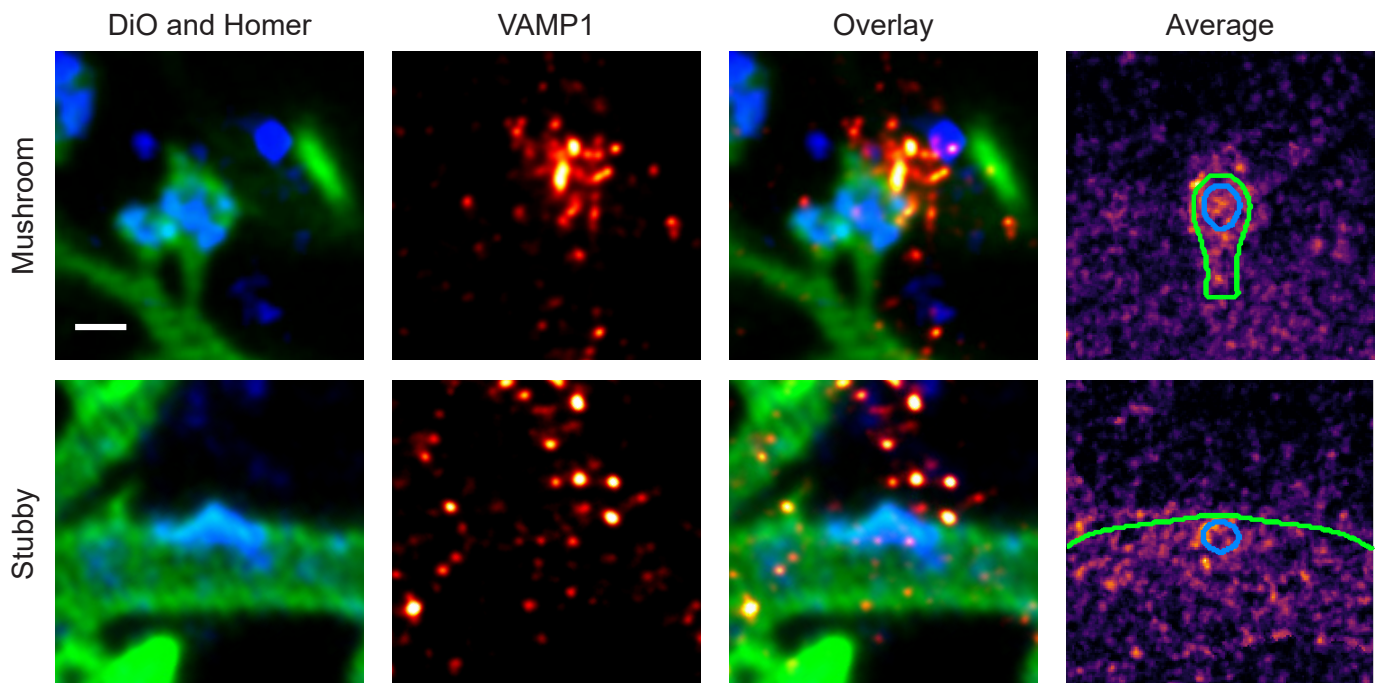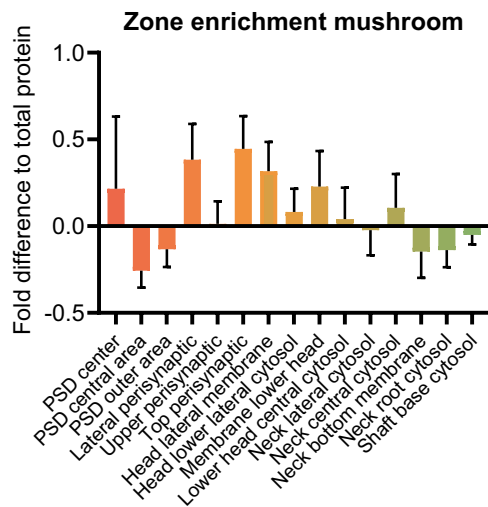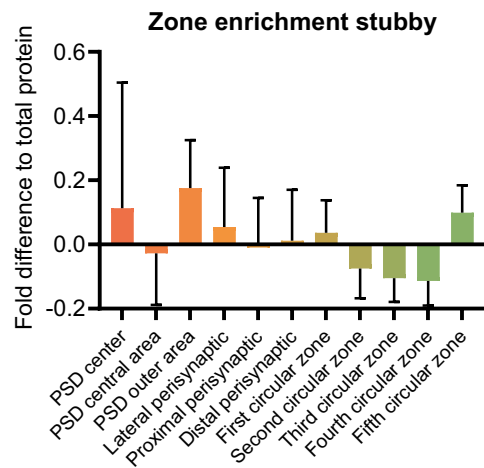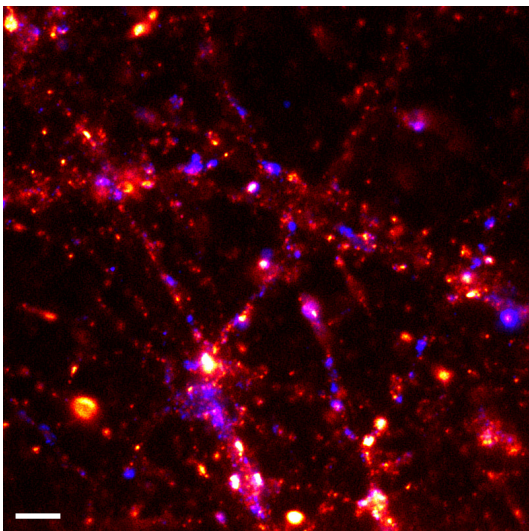

|                        |                            |               |
|------------------------|----------------------------|---------------|
| Whole cell copy number | 2485719.9 ± 722352.8       |               |
| Spine copy number      | 363.4 ± 134.4              |               |
| Function               | SNAREs and assoc. proteins |               |
|                        | Mushroom                   | Stubby        |
| Spine copy number      | 334.3 ± 123.6              | 447.7 ± 165.6 |
| % of total protein     | 0.0 ± 0.0%                 | 0.0 ± 0.0%    |
| Molarity (μM)          | 4.2 ± 1.6                  | 4.2 ± 1.6     |
| PSD copy number        | 0 ± 0.0                    | 0 ± 0.0       |
| % in PSD               | 0.0 ± 0.0%                 | 0.0 ± 0.0%    |

|          | Spine copy number | % of total protein | Molarity ( $\mu\text{M}$ ) | PSD copy number |
|----------|-------------------|--------------------|----------------------------|-----------------|
| Mushroom | $334.3 \pm 123.6$ | $0.0 \pm 0.0\%$    | $4.2 \pm 1.6$              | $0 \pm 0.0$     |
| Stubby   | $447.7 \pm 165.6$ | $0.0 \pm 0.0\%$    | $4.2 \pm 1.6$              | $0 \pm 0.0$     |

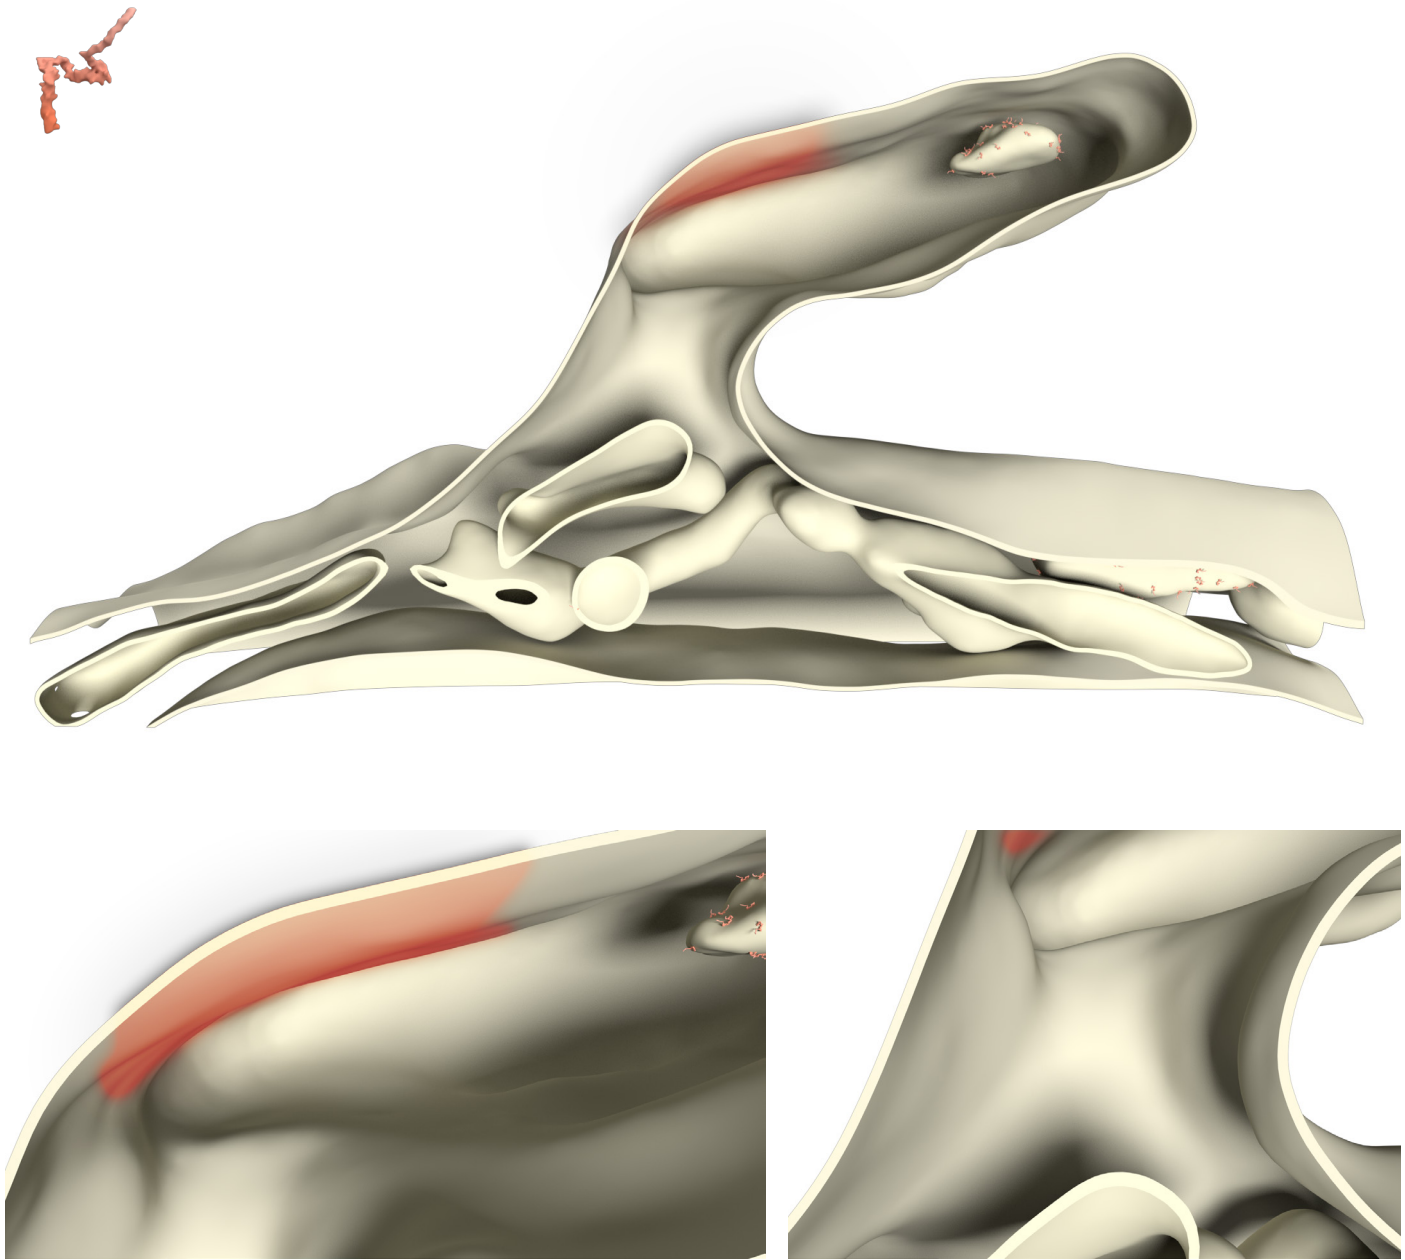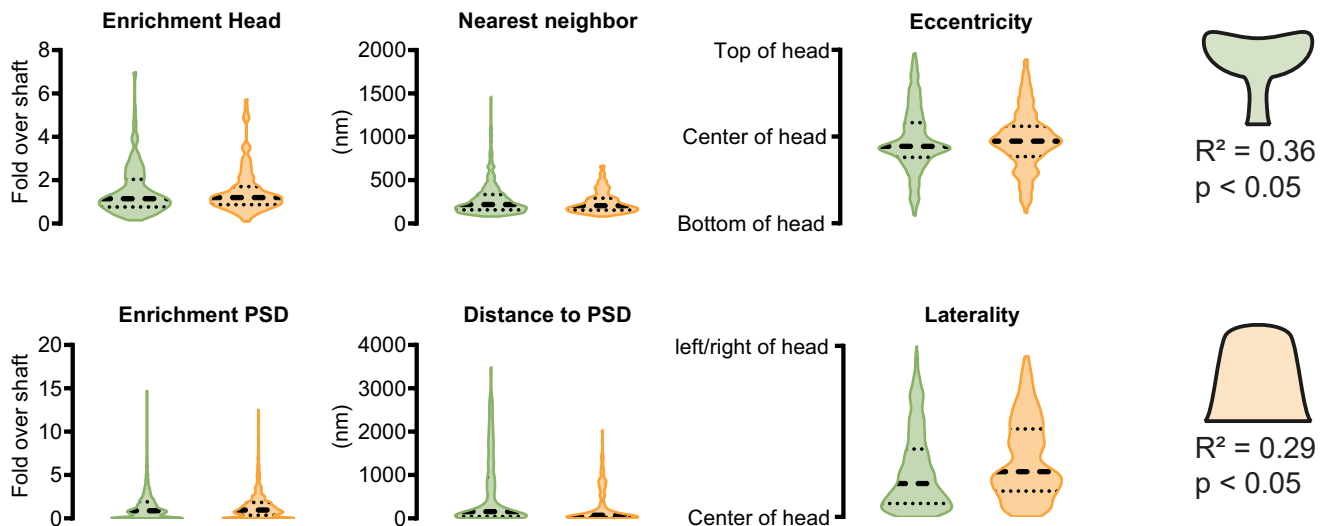

|          | Spine copy number | % of total protein | Molarity ( $\mu\text{M}$ ) | PSD copy number |
|----------|-------------------|--------------------|----------------------------|-----------------|
| Mushroom | $334.3 \pm 123.6$ | $0.0 \pm 0.0\%$    | $4.2 \pm 1.6$              | $0 \pm 0.0$     |
| Stubby   | $447.7 \pm 165.6$ | $0.0 \pm 0.0\%$    | $4.2 \pm 1.6$              | $0 \pm 0.0$     |

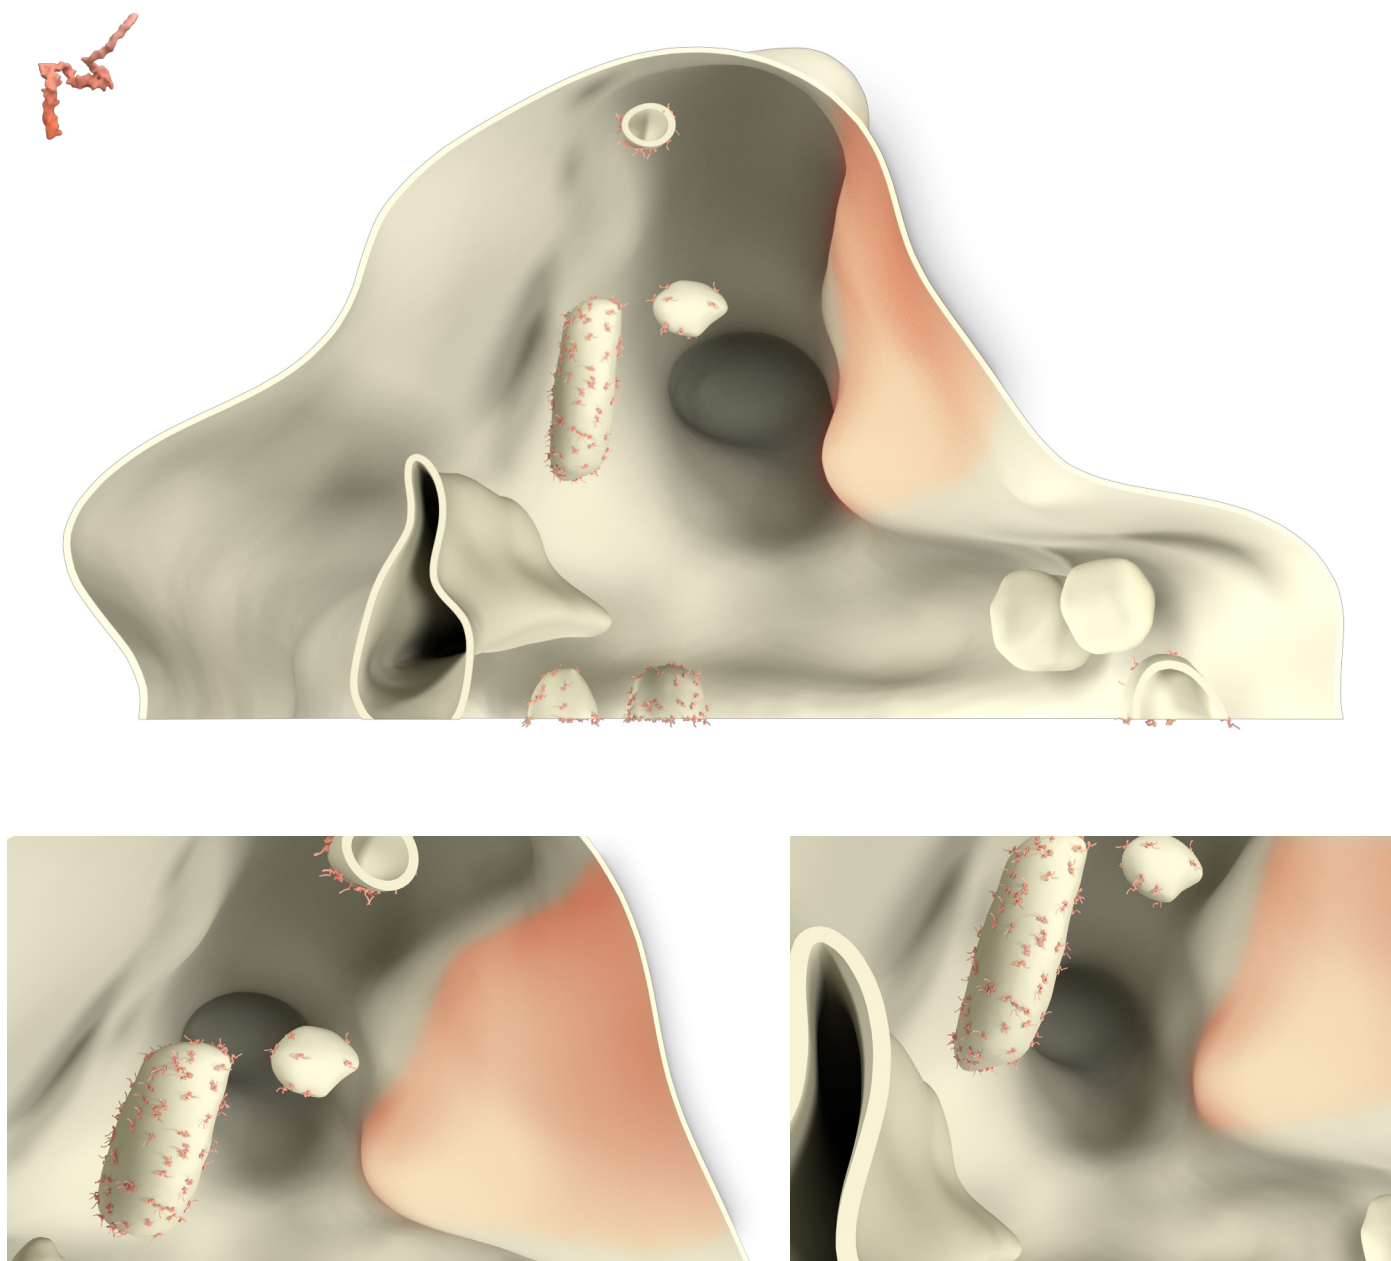

## References

**Antibody:** Synaptic Systems 104 002

**PDB Identifier:** modified VAMP2

### Literature:

Calakos et al., 1994, Science

Gu and Huganir, 2016, Proc. Natl. Acad. Sci. U S A

Trimble et al., 1988, Proc. Natl. Acad. Sci. U S A



## VAMP2 (Synaptobrevin2, Gene: Vamp2, Uniprot ID: P63045)

**Known function:** R SNARE, SV release, Delivery of AMPAR and GABAAR to PM

**Known organization:** Transmembrane protein, On SV and small postsynaptic vesicles close to PSD

**Known Interactions:** Syntaxin1, Syntaxin4, SNAP25, Synaptotagmin1, CDC42

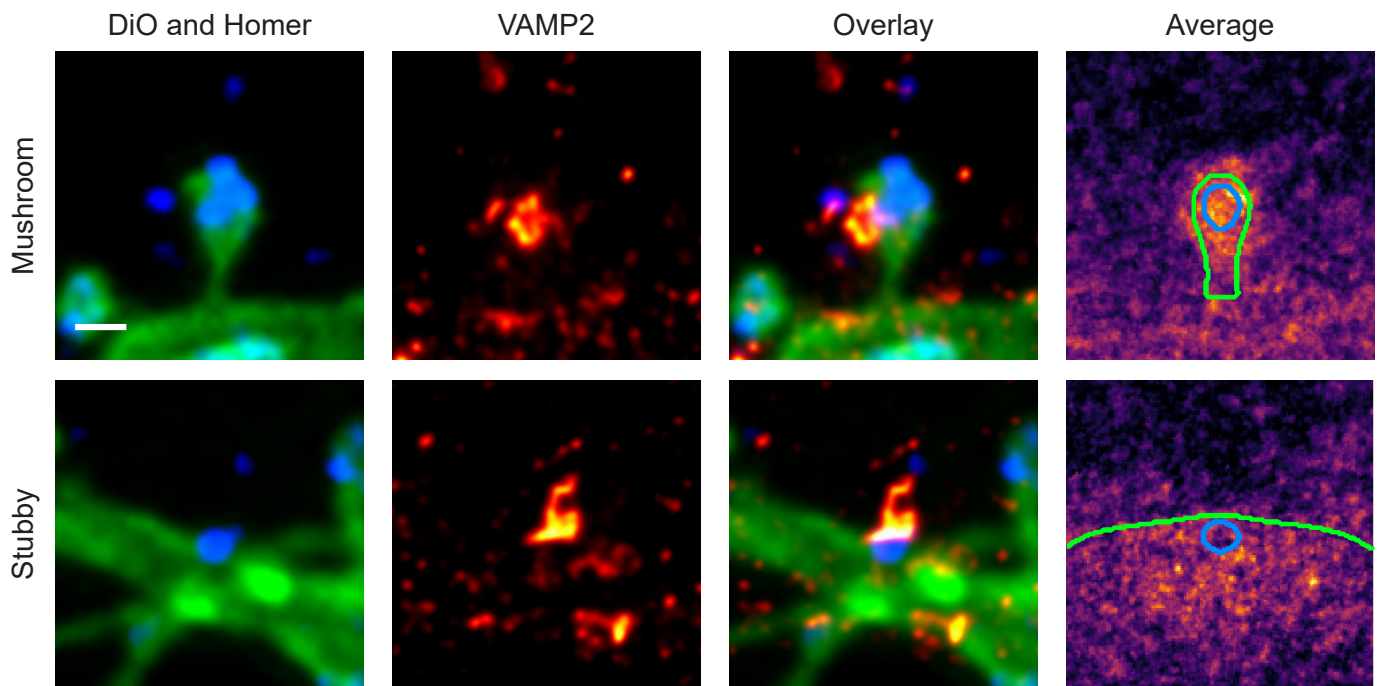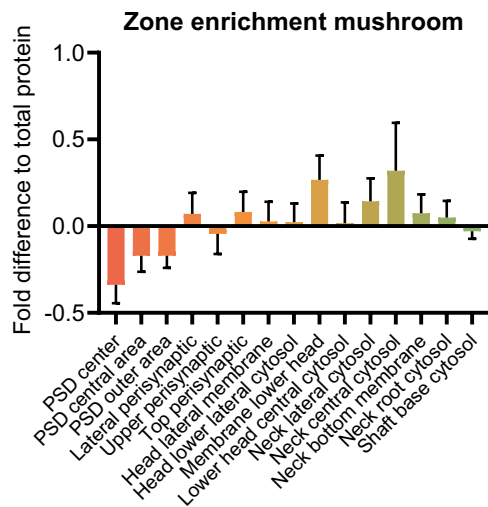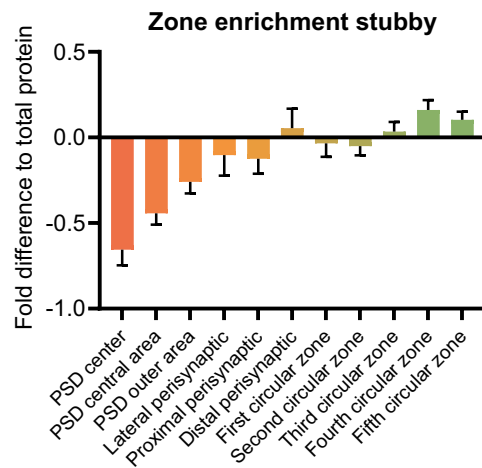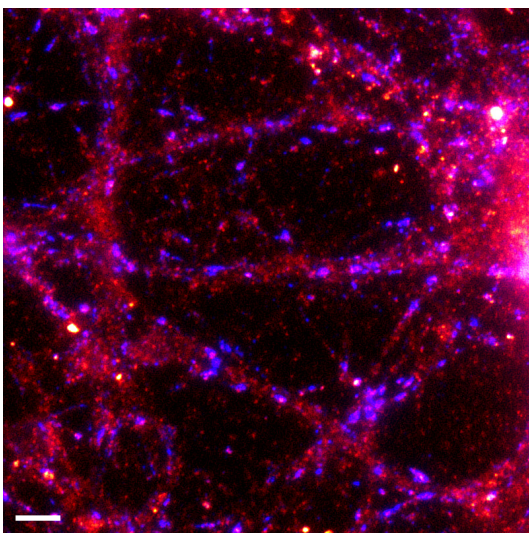

|                        |                            |                 |
|------------------------|----------------------------|-----------------|
| Whole cell copy number | 18720616.2 ± 8591610.7     |                 |
| Spine copy number      | 2045.0 ± 1165.3            |                 |
| Function               | SNAREs and assoc. proteins |                 |
|                        | Mushroom                   | Stubby          |
| Spine copy number      | 2050.9 ± 1168.7            | 2134.7 ± 1216.4 |
| % of total protein     | 0.1 ± 0.1%                 | 0.1 ± 0.1%      |
| Molarity (μM)          | 26.0 ± 14.8                | 20.2 ± 11.5     |
| PSD copy number        | 0 ± 0.0                    | 0 ± 0.0         |
| % in PSD               | 0.0 ± 0.0%                 | 0.0 ± 0.0%      |

|          | Spine copy number   | % of total protein | Molarity ( $\mu\text{M}$ ) | PSD copy number |
|----------|---------------------|--------------------|----------------------------|-----------------|
| Mushroom | $2050.9 \pm 1168.7$ | $0.1 \pm 0.1\%$    | $26.0 \pm 14.8$            | $0 \pm 0.0$     |
| Stubby   | $2134.7 \pm 1216.4$ | $0.1 \pm 0.1\%$    | $20.2 \pm 11.5$            | $0 \pm 0.0$     |

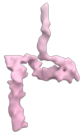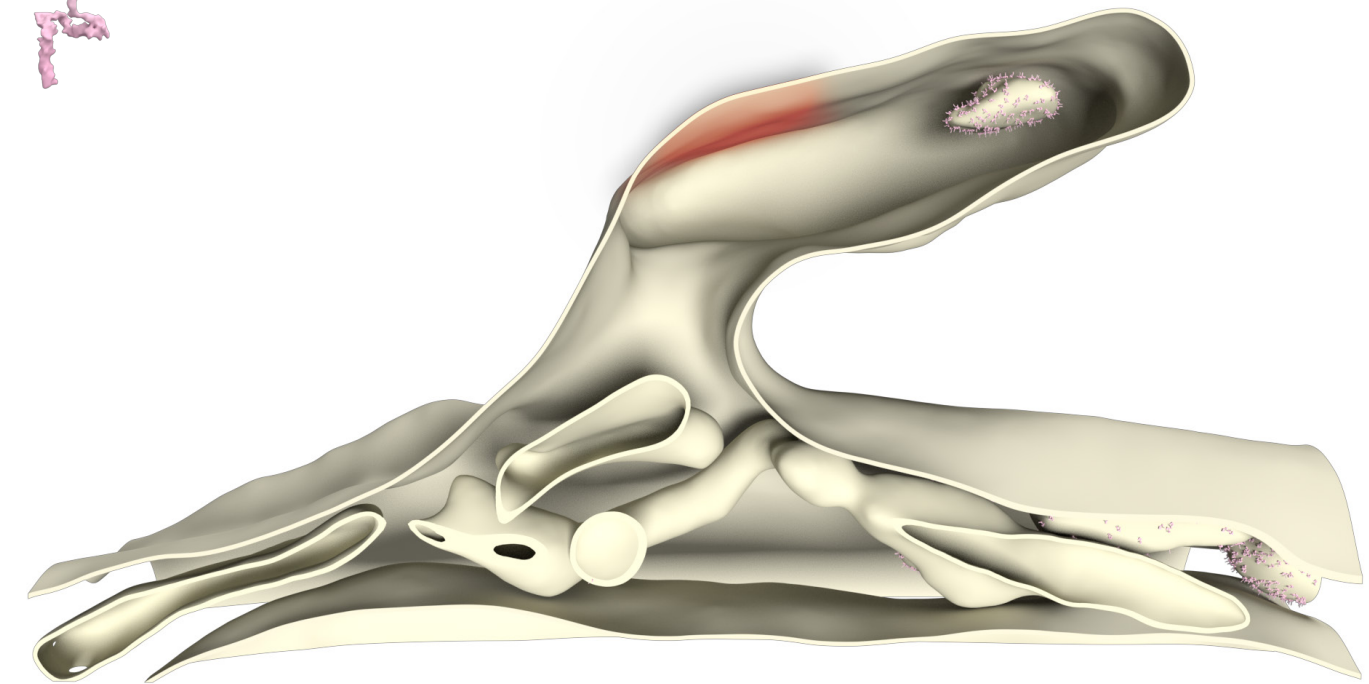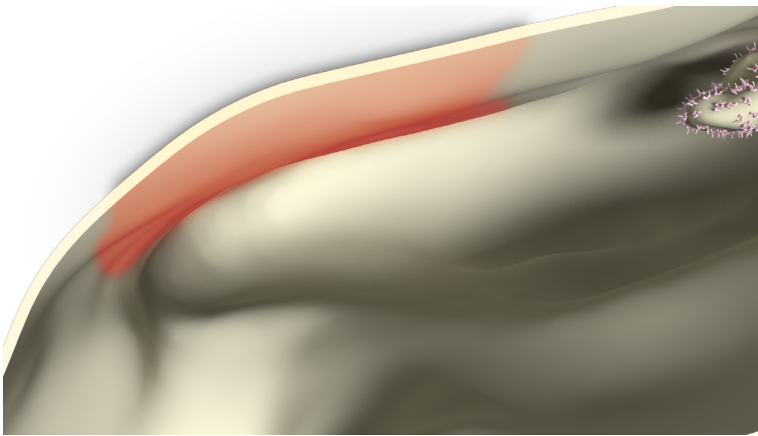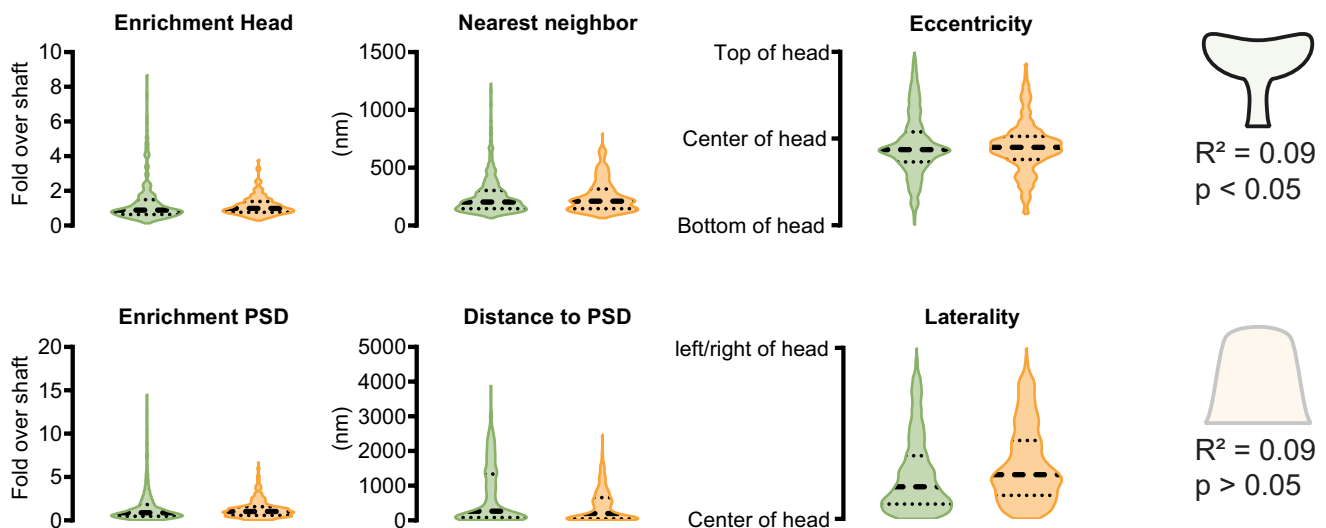

|          | Spine copy number   | % of total protein | Molarity ( $\mu\text{M}$ ) | PSD copy number |
|----------|---------------------|--------------------|----------------------------|-----------------|
| Mushroom | $2050.9 \pm 1168.7$ | $0.1 \pm 0.1\%$    | $26.0 \pm 14.8$            | $0 \pm 0.0$     |
| Stubby   | $2134.7 \pm 1216.4$ | $0.1 \pm 0.1\%$    | $20.2 \pm 11.5$            | $0 \pm 0.0$     |

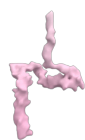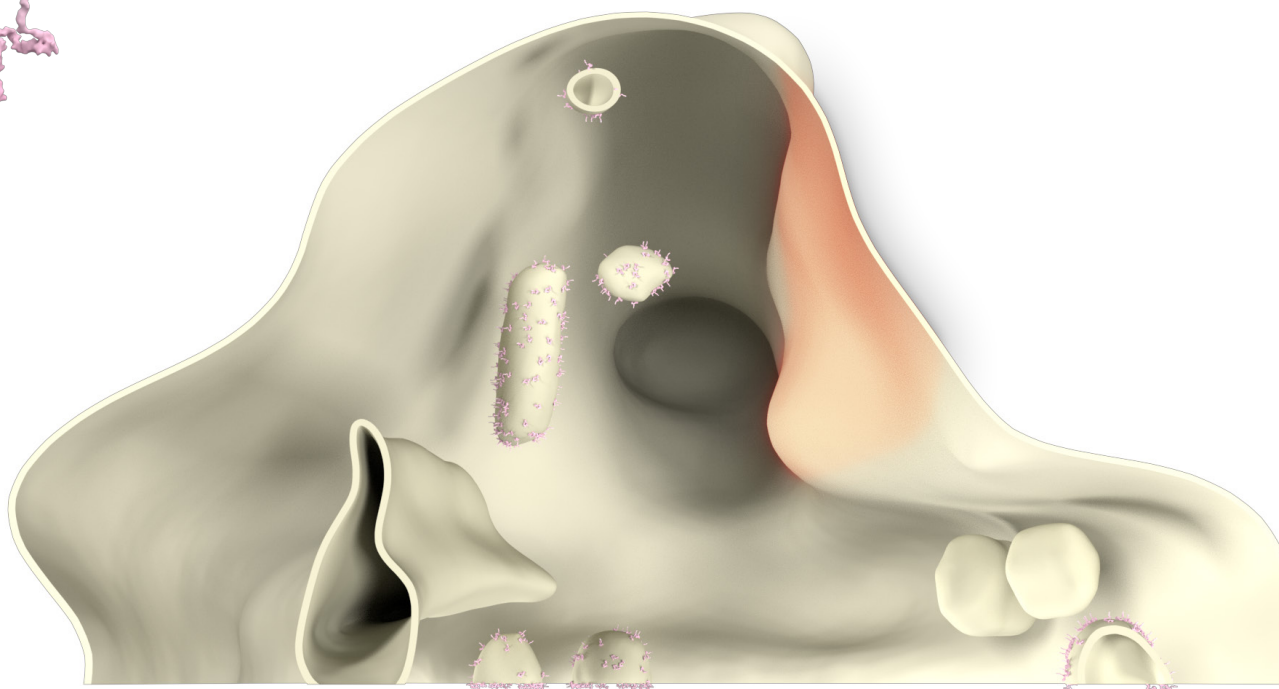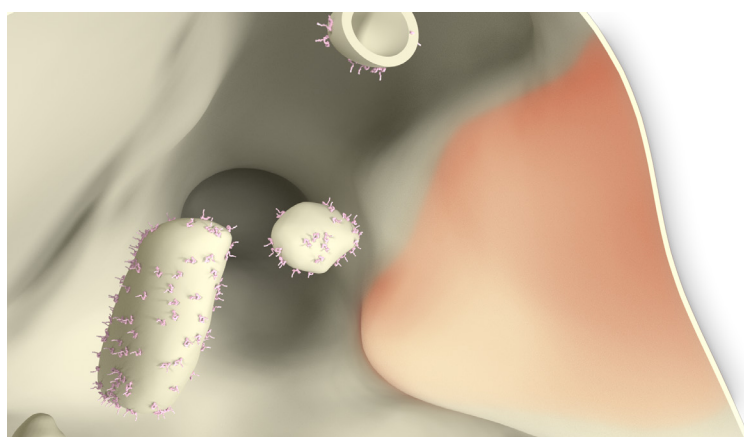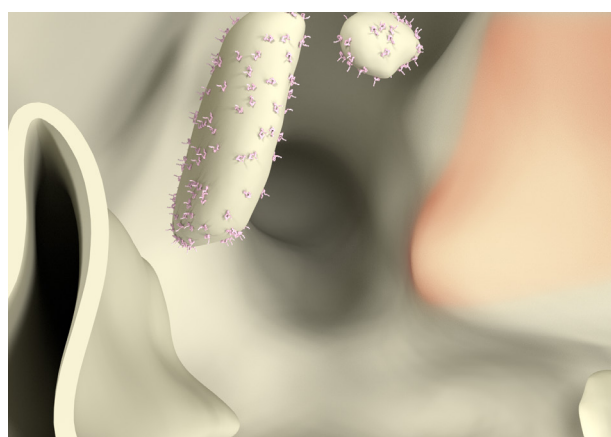

## References

**Antibody:** Synaptic Systems 104 211

**PDB Identifier:** 2kog

### Literature:

Calakos et al., 1994, Science

Gu et al., 2016, Proc. Natl. Acad. Sci. U S A

Hu et al., 2002, Nature

Hussain and Davanger, 2015, PLoS One

Jurado et al., 2013, Neuron

Nevins and Thurmond, 2005, J. Biol. Chem.



**VAMP7 (Sybl1, Ti-VAMP, Gene: Vamp7, Uniprot ID: Q9JHW5)**

**Known function:** R SNARE, Lysosome secretion

**Known organization:** Transmembrane protein, On endosomes, TGN and lysosomes, Extrasynaptic

**Known Interactions:** Syntaxin1, Syntaxin4, SNAP23, SNAP25

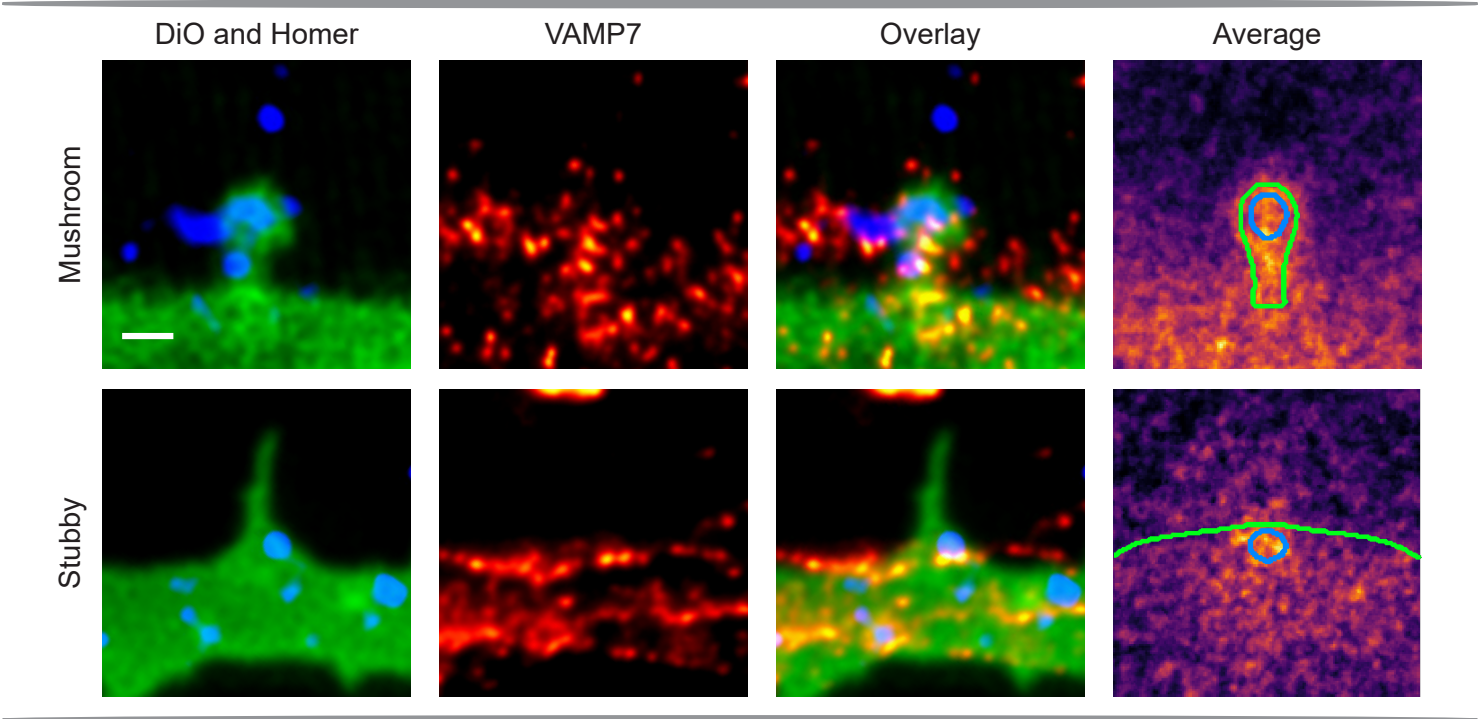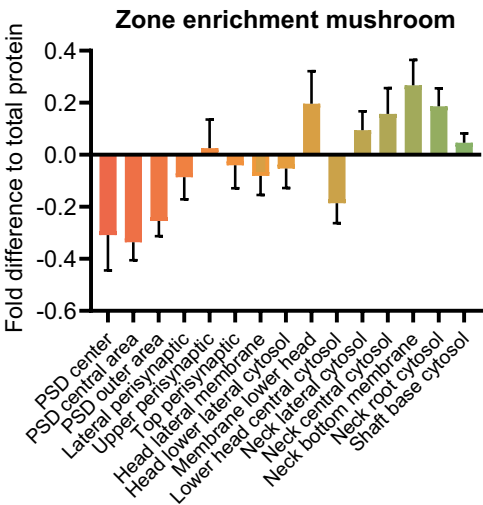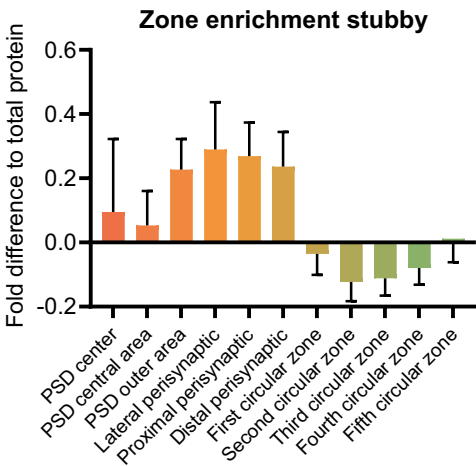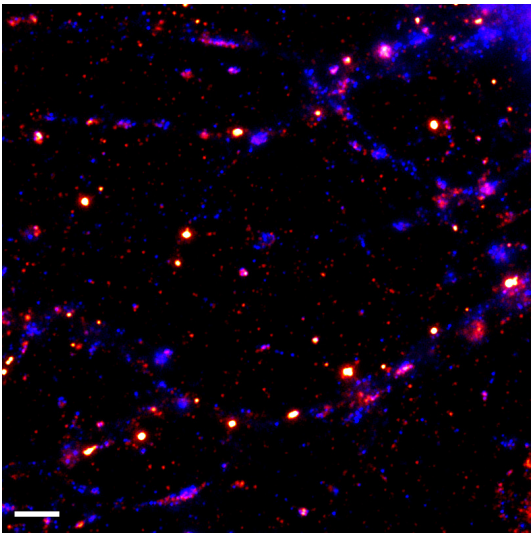

|                        |                            |              |
|------------------------|----------------------------|--------------|
| Whole cell copy number | 798340.7 ± 149212.5        |              |
| Spine copy number      | 109.5 ± 42.8               |              |
| Function               | SNAREs and assoc. proteins |              |
|                        | Mushroom                   | Stubby       |
| Spine copy number      | 97.2 ± 38.0                | 116.2 ± 45.4 |
| % of total protein     | 0.0 ± 0.0%                 | 0.0 ± 0.0%   |
| Molarity (μM)          | 1.2 ± 0.5                  | 1.1 ± 0.4    |
| PSD copy number        | 0 ± 0.0                    | 2 ± 0.8      |
| % in PSD               | 0.0 ± 0.0%                 | 1.7 ± 0.7%   |

|          | Spine copy number | % of total protein | Molarity ( $\mu\text{M}$ ) | PSD copy number |
|----------|-------------------|--------------------|----------------------------|-----------------|
| Mushroom | $97.2 \pm 38.0$   | $0.0 \pm 0.0\%$    | $1.2 \pm 0.5$              | $0 \pm 0.0$     |
| Stubby   | $116.2 \pm 45.4$  | $0.0 \pm 0.0\%$    | $1.2 \pm 0.5$              | $2 \pm 0.8$     |

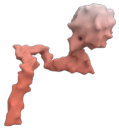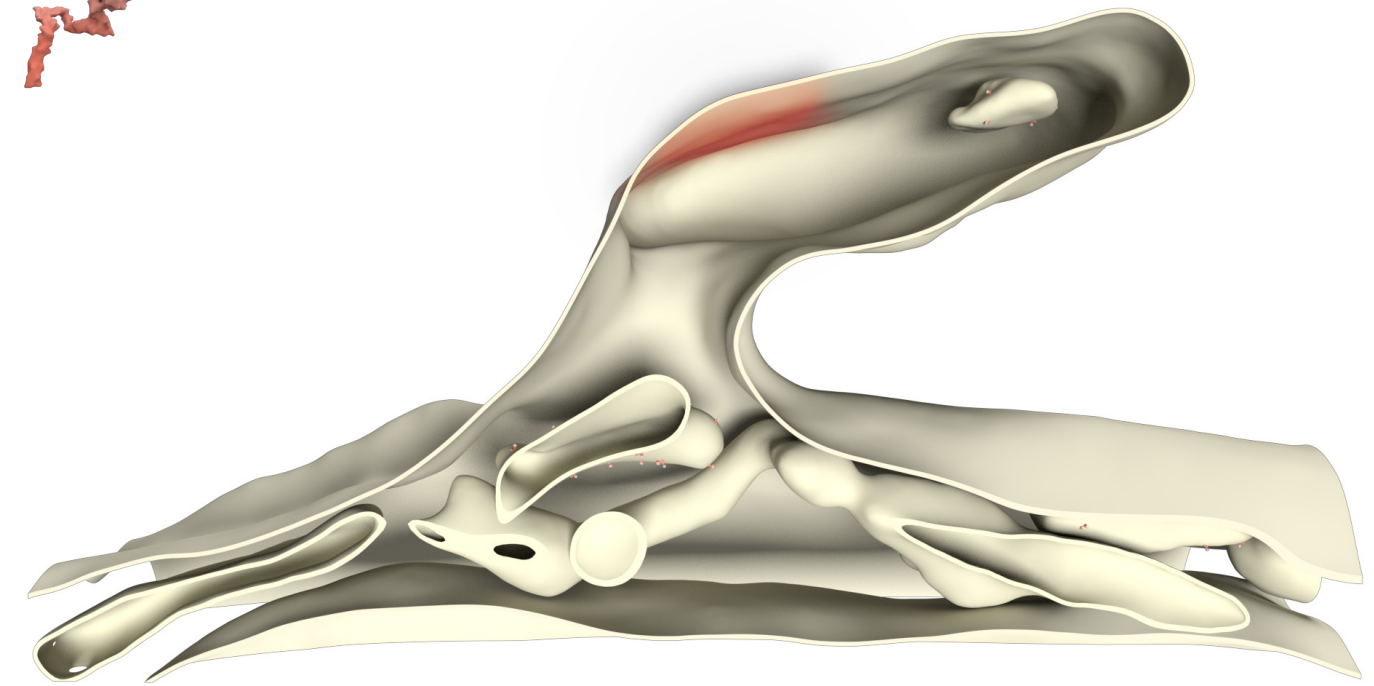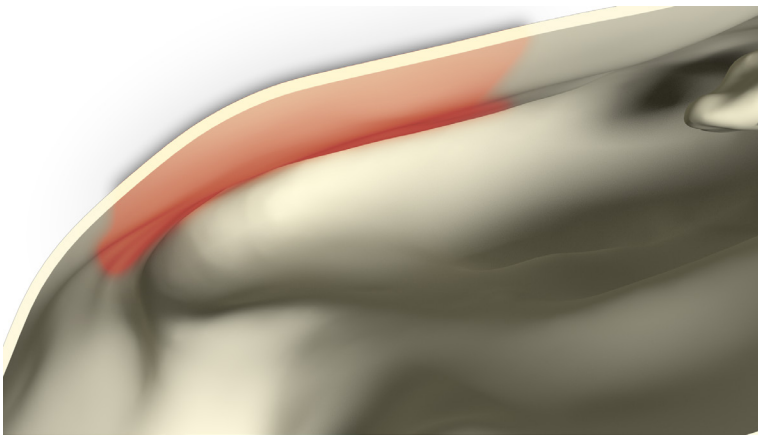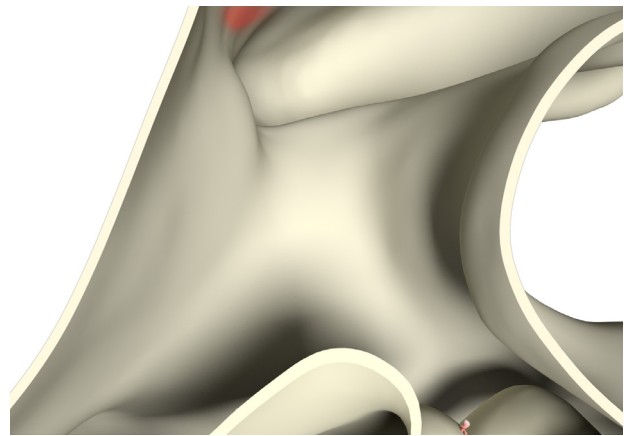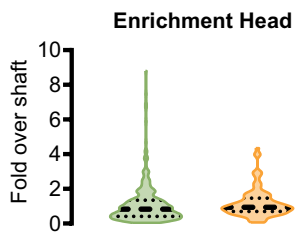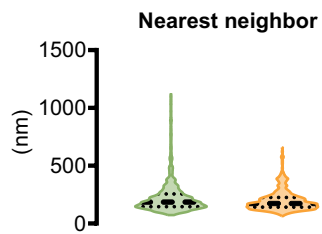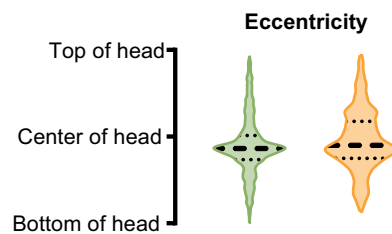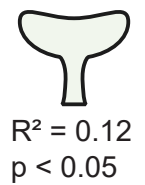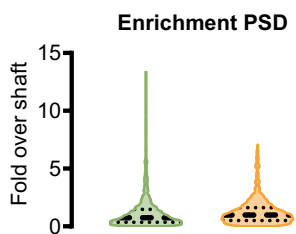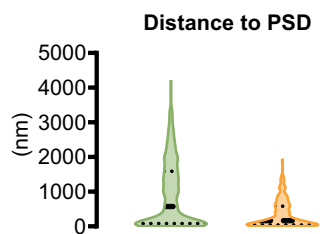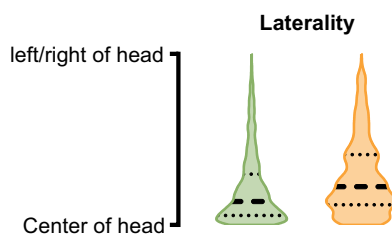

|          | Spine copy number | % of total protein | Molarity ( $\mu\text{M}$ ) | PSD copy number |
|----------|-------------------|--------------------|----------------------------|-----------------|
| Mushroom | $97.2 \pm 38.0$   | $0.0 \pm 0.0\%$    | $1.2 \pm 0.5$              | $0 \pm 0.0$     |
| Stubby   | $116.2 \pm 45.4$  | $0.0 \pm 0.0\%$    | $1.2 \pm 0.5$              | $2 \pm 0.8$     |

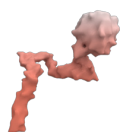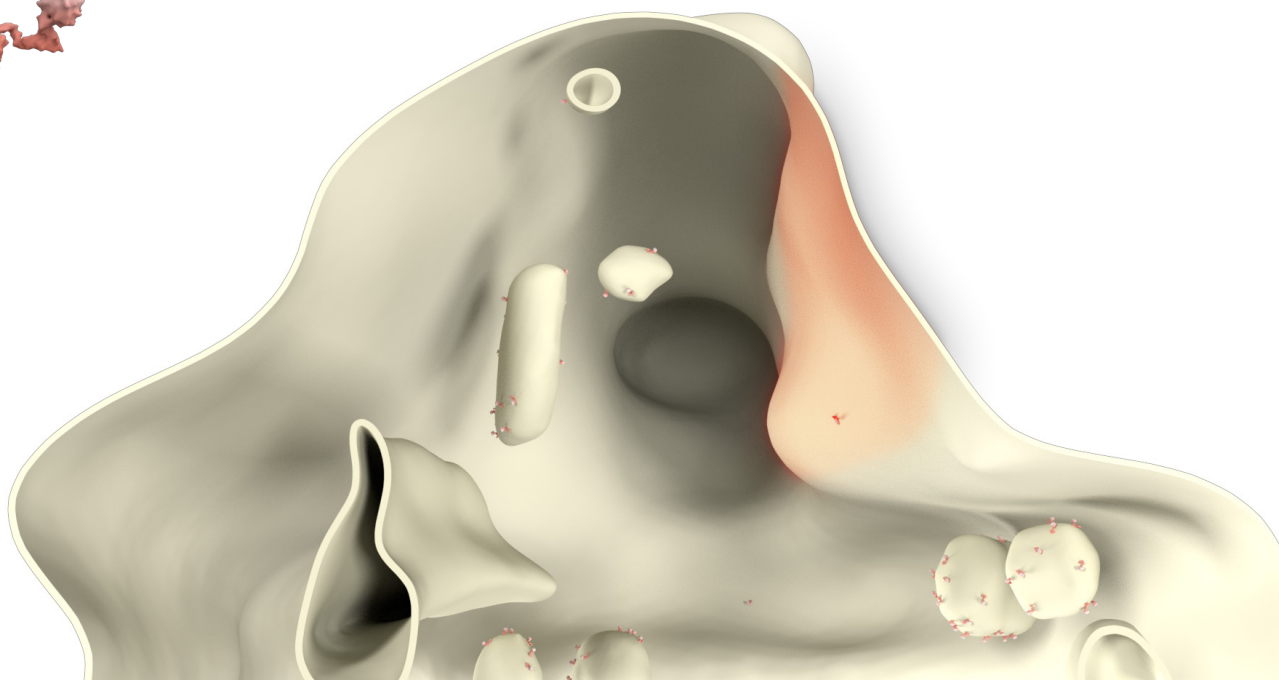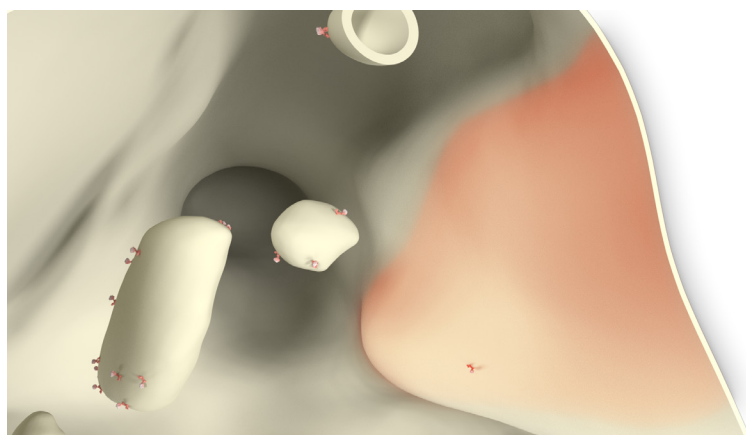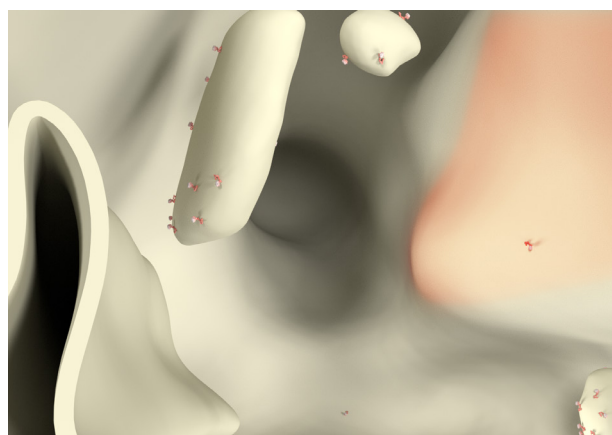

## References

**Antibody:** Abcam ab68776

**PDB Identifier:** 2dmw

### Literature:

Advani et al., 1999, J. Cell. Biol.

Alberts et al., 2003, Mol. Biol. Cell.

Martinez-Arca et al., 2003, Proc. Natl. Acad. Sci. U S A

Rao et al., 2004, J. Biol. Chem.

Scheuber et al., 2006, Proc. Natl. Acad. Sci. U S A



## Vti1a (Vti1l2, Gene: Vti1a, Uniprot ID: Q9JI51)

**Known function:** Qb SNARE, Endosome-TGN transport, Homotypic endosome fusion

**Known organization:** Transmembrane protein, On endosomes, TGN, SV, CCV

**Known Interactions:** Syntaxin6, Syntaxin16, VAMP4

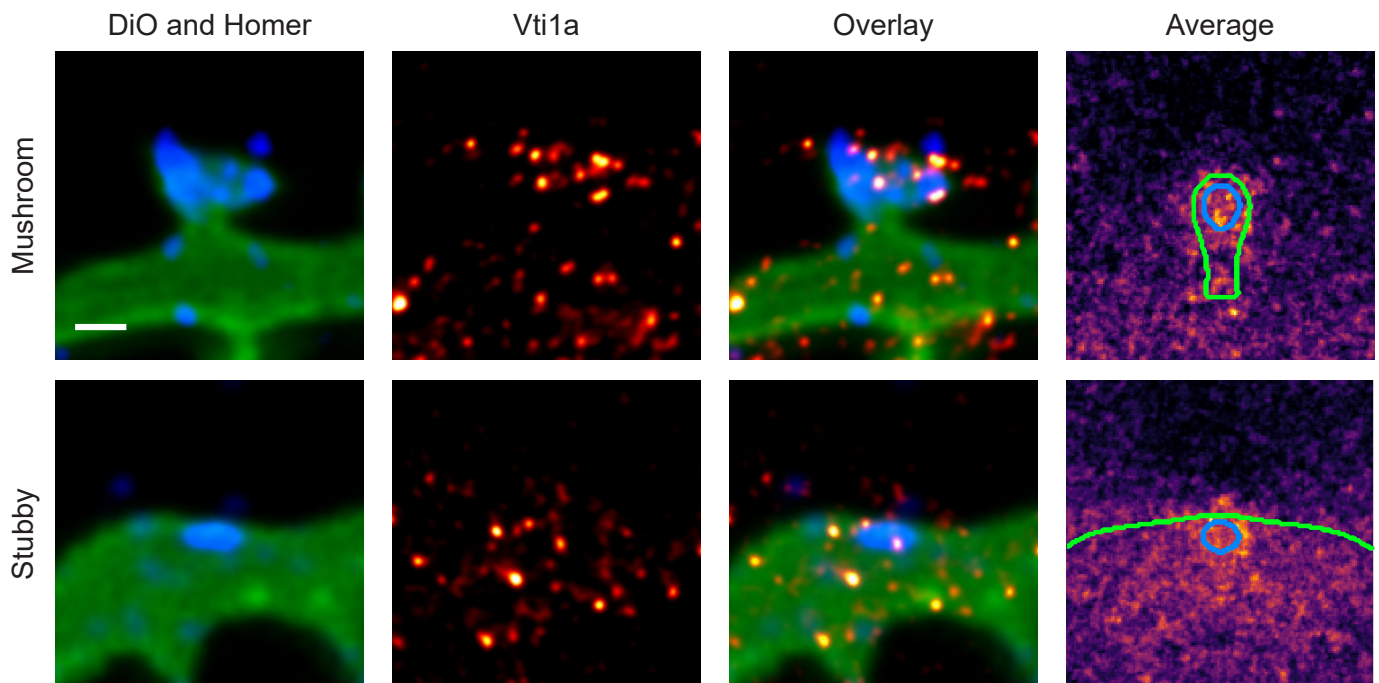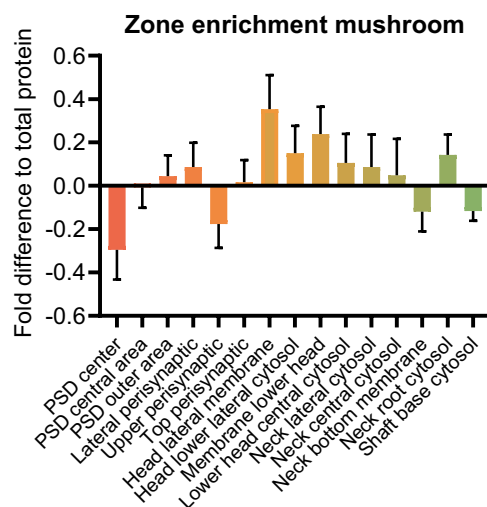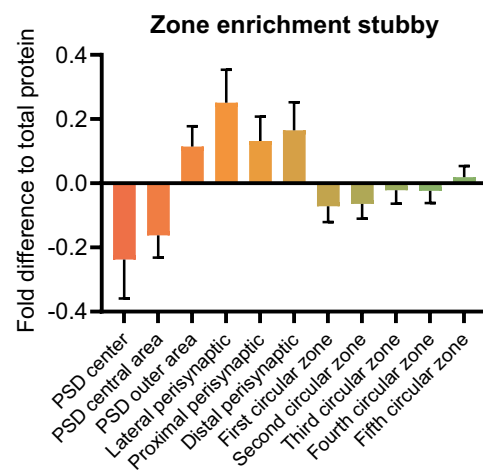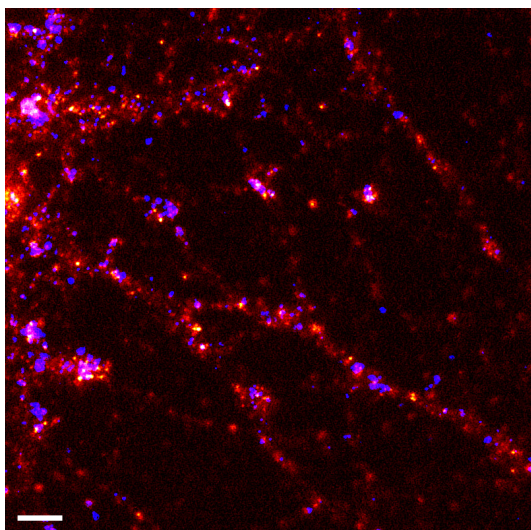

|                        |                            |              |
|------------------------|----------------------------|--------------|
| Whole cell copy number | 952127.0 ± 557332.5        |              |
| Spine copy number      | 119.4 ± 75.5               |              |
| Function               | SNAREs and assoc. proteins |              |
|                        | Mushroom                   | Stubby       |
| Spine copy number      | 104.6 ± 66.2               | 142.4 ± 90.1 |
| % of total protein     | 0.0 ± 0.0%                 | 0.0 ± 0.0%   |
| Molarity (μM)          | 1.3 ± 0.8                  | 1.3 ± 0.9    |
| PSD copy number        | 0 ± 0.0                    | 0 ± 0.0      |
| % in PSD               | 0.0 ± 0.0%                 | 0.0 ± 0.0%   |

|          | Spine copy number | % of total protein | Molarity ( $\mu\text{M}$ ) | PSD copy number |
|----------|-------------------|--------------------|----------------------------|-----------------|
| Mushroom | $104.6 \pm 66.2$  | $0.0 \pm 0.0\%$    | $1.3 \pm 0.8$              | $0 \pm 0.0$     |
| Stubby   | $142.4 \pm 90.1$  | $0.0 \pm 0.0\%$    | $1.3 \pm 0.9$              | $0 \pm 0.0$     |

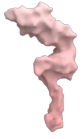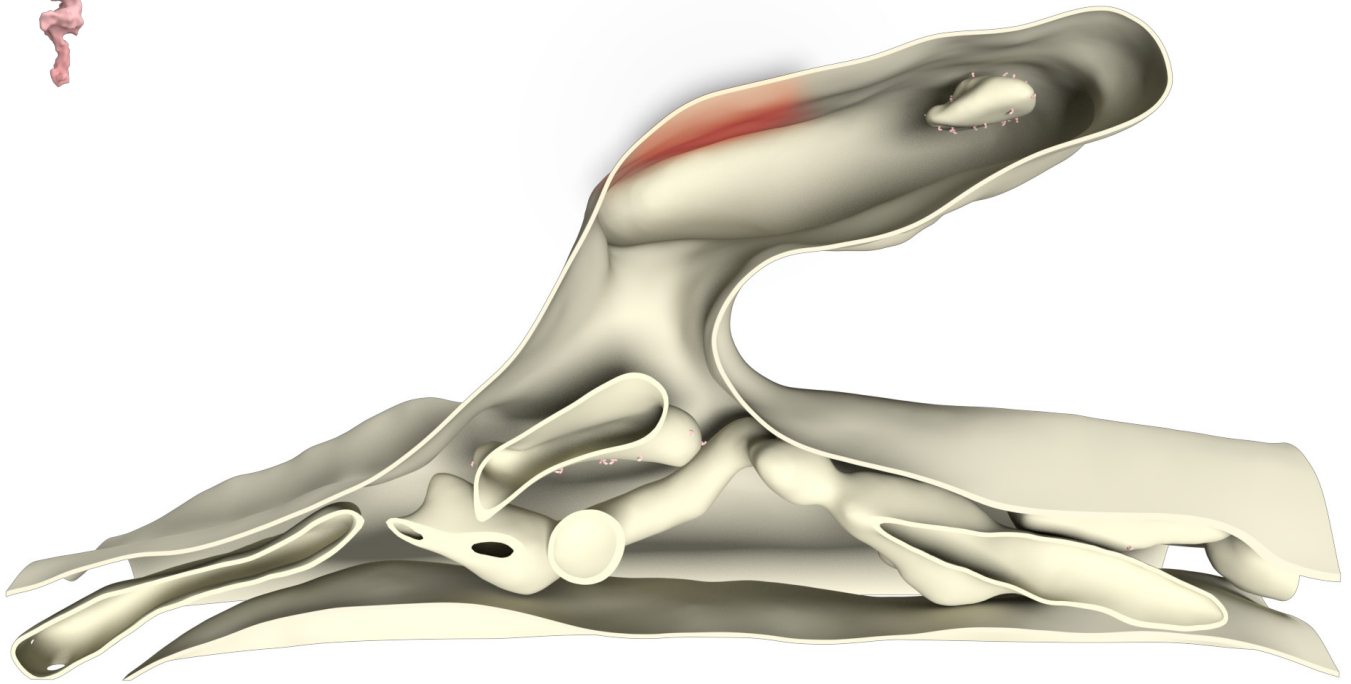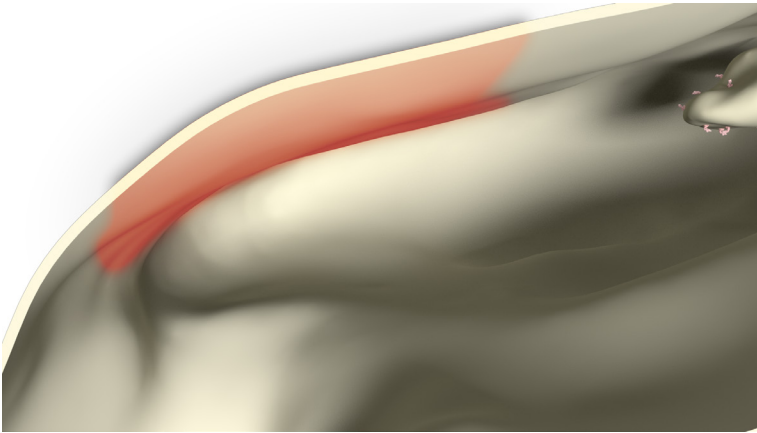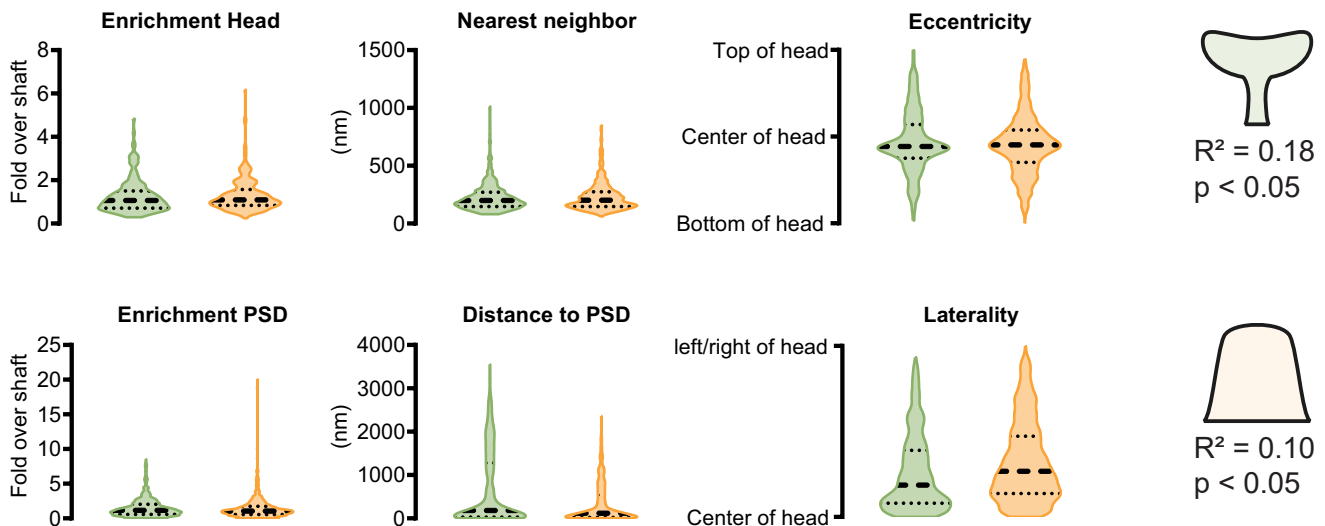

|          | Spine copy number | % of total protein | Molarity ( $\mu\text{M}$ ) | PSD copy number |
|----------|-------------------|--------------------|----------------------------|-----------------|
| Mushroom | $104.6 \pm 66.2$  | $0.0 \pm 0.0\%$    | $1.3 \pm 0.8$              | $0 \pm 0.0$     |
| Stubby   | $142.4 \pm 90.1$  | $0.0 \pm 0.0\%$    | $1.3 \pm 0.9$              | $0 \pm 0.0$     |

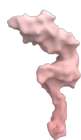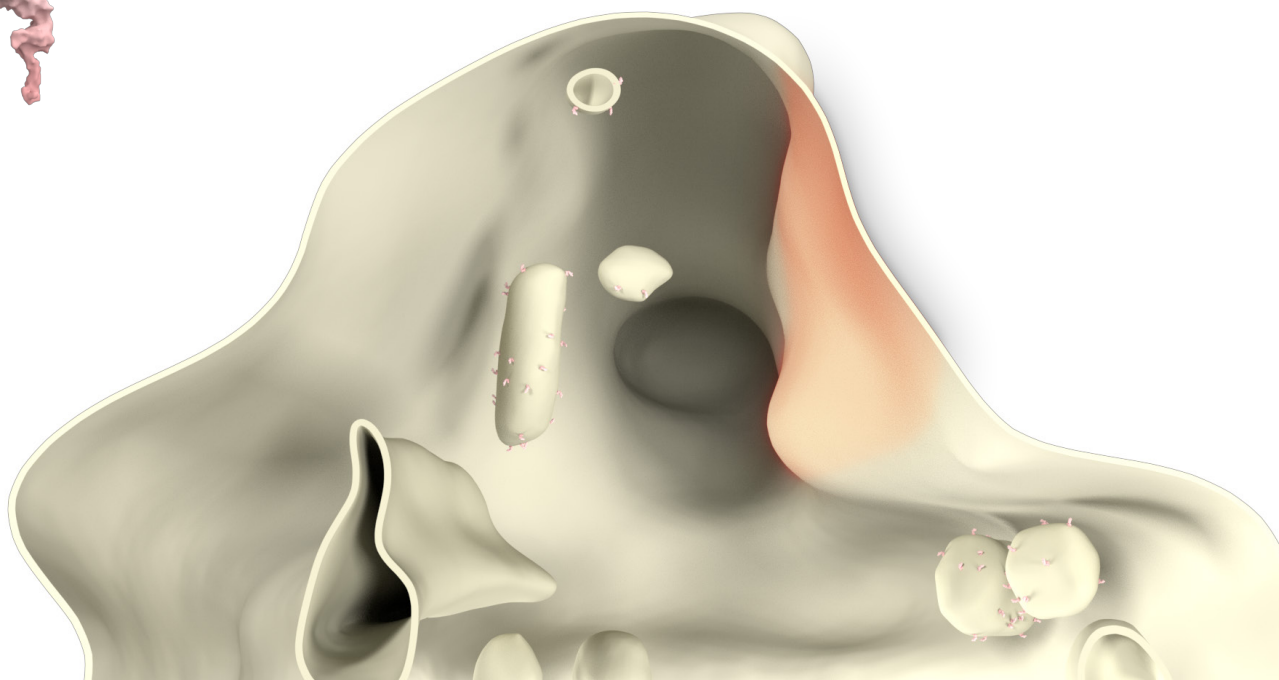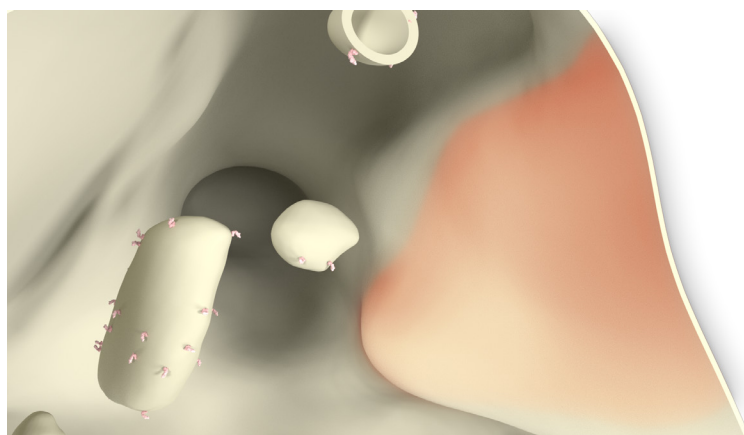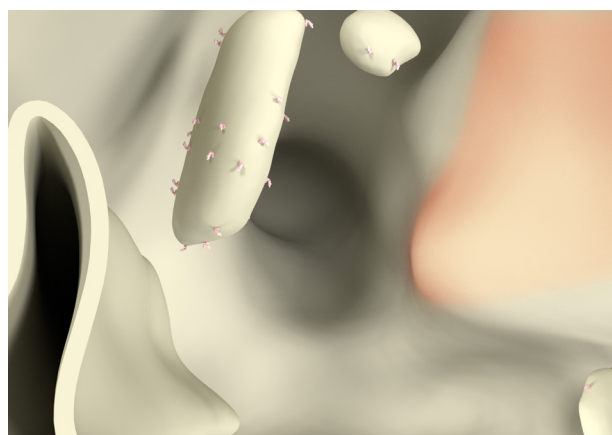

## References

**Antibody:** BD Biosciences 611220

**Structure:** from Takamori et al. 2006

### Literature:

Amessou et al., 2007, J. Cell. Sci.

Antonin et al., 2002, J. Biol. Chem.

Brandhorst et al., 2006, Proc. Natl. Acad. Sci. U S A

Fischer von Mollard and Stevens, 1998, J. Biol. Chem.

Mallard et al., 2002, J. Cell. Biol.

McBride et al., 1999, Cell

Shitara et al., 2013, Mol. Cell. Biochem.

Zwilling et al., 2007, EMBO J.



proteinname

Boxplot depicting mushroom zone enrichment. Shown are 10th - 90th percentile whisker, with quartiles and median boxes.

Boxplot depicting stubby zone enrichment. Shown are 10th - 90th percentile whisker, with quartiles and median boxes.

For sample sizes of each protein, please refer to Supplementary Table 5.

Actin

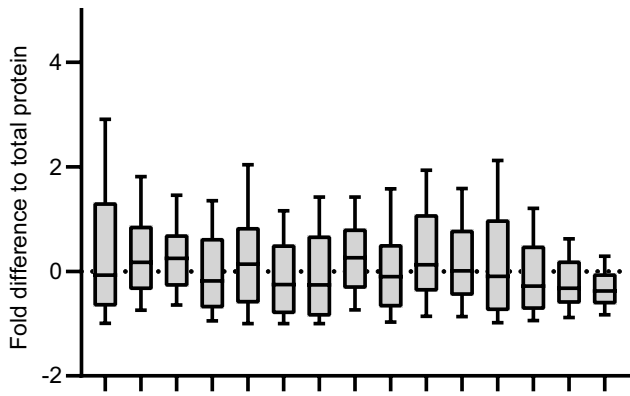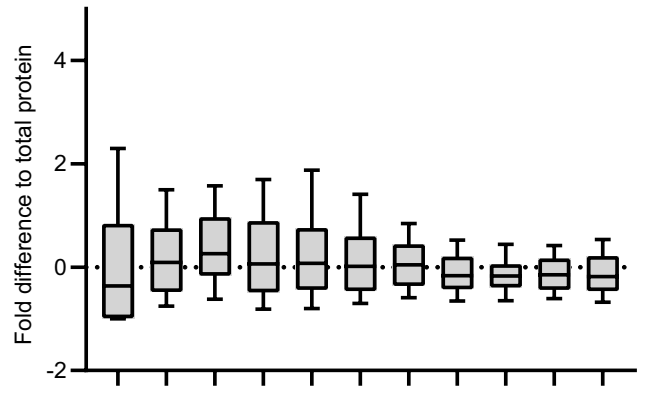

ADAM22

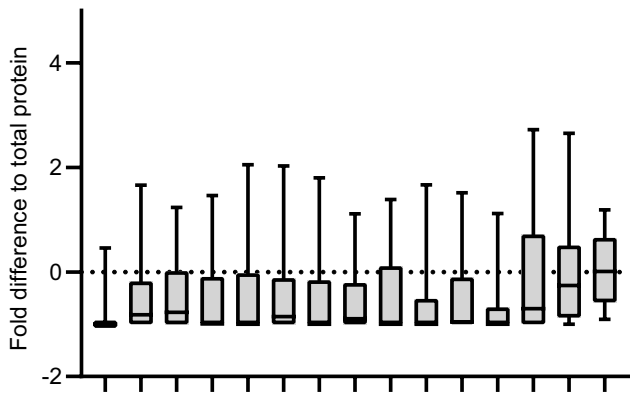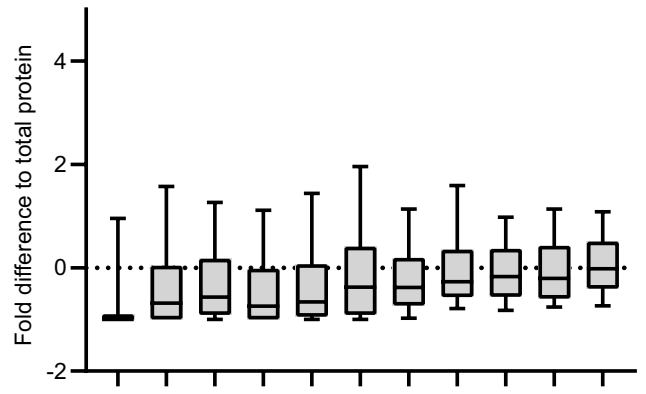

Akt

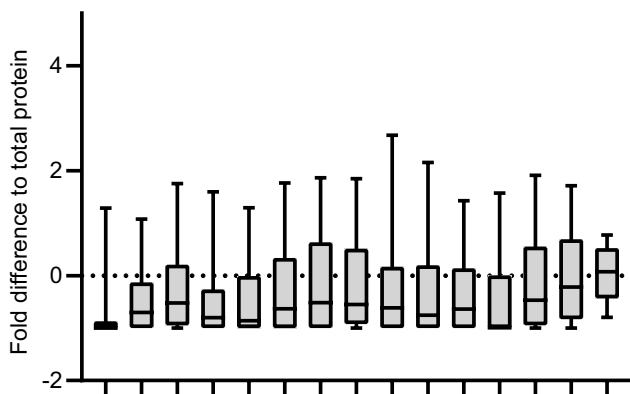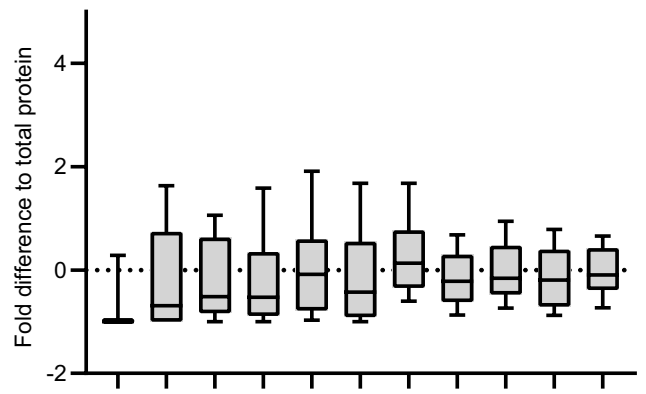

$\alpha/\beta$ -SNAP

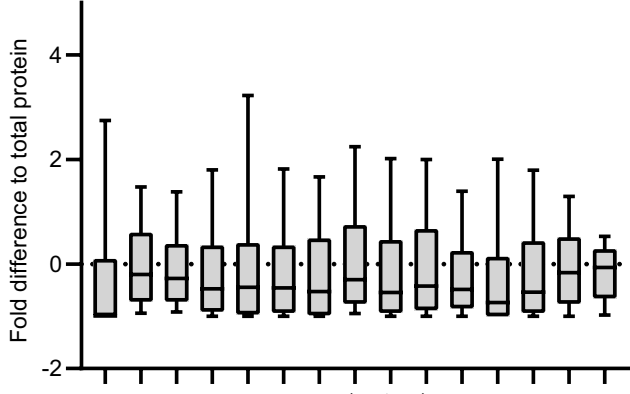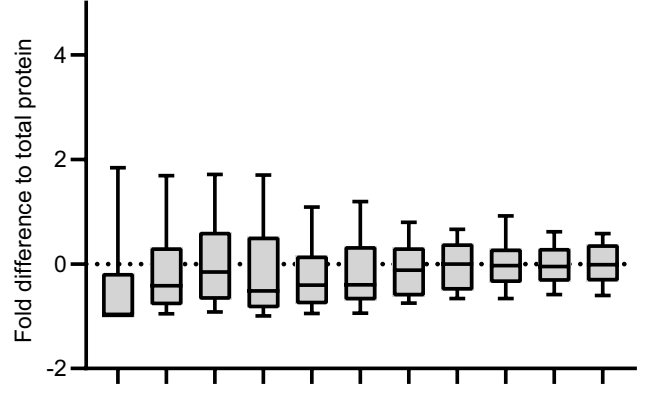

PSD Center  
PSD Central Area  
PSD Outer Area  
Lateral perisynaptic  
Upper perisynaptic  
Top perisynaptic  
Head lateral membrane  
Head lower lateral membrane  
Membrane lower cytosol  
Neck head central cytosol  
Neck lateral cytosol  
Neck central cytosol  
Neck bottom membrane  
Neck root cytosol  
Shaft base cytosol

PSD Center  
PSD Central Area  
PSD Outer Area  
Lateral perisynaptic  
Proximal perisynaptic  
Distal perisynaptic  
First ring  
Second ring  
Third ring  
Fourth ring  
Fifth ring

$\alpha$ -internexin

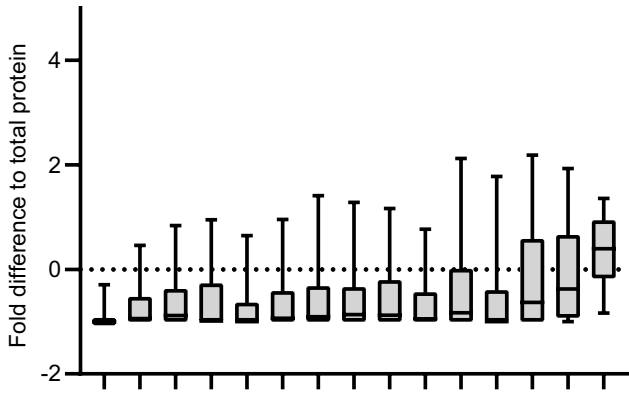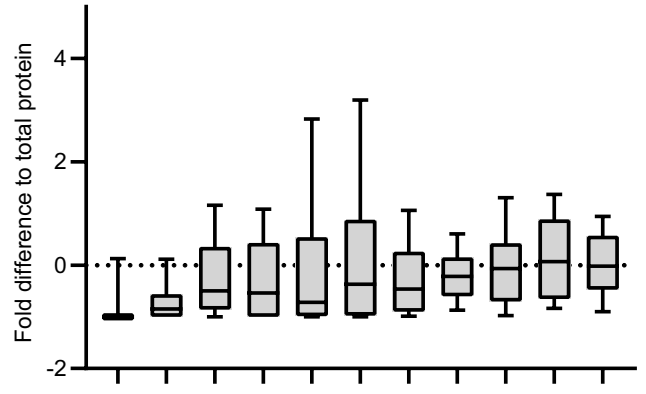

AP180

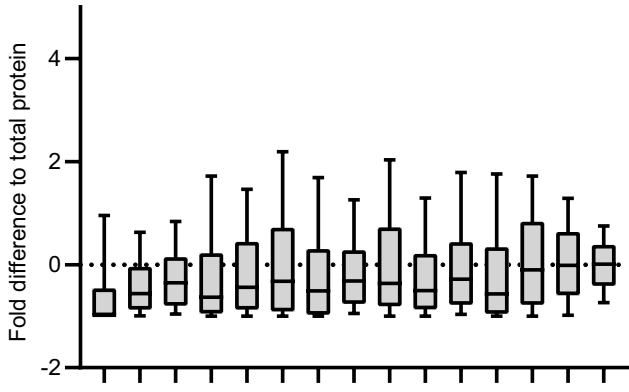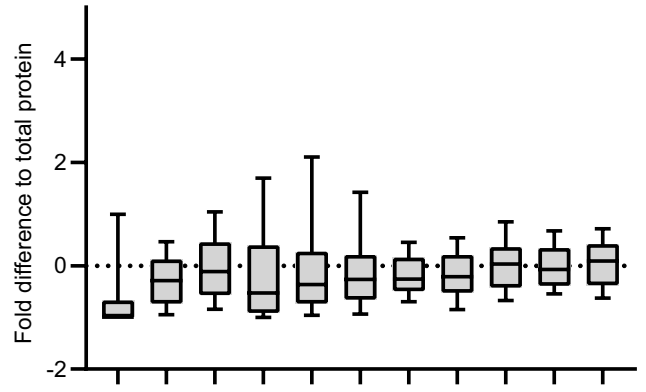

APP

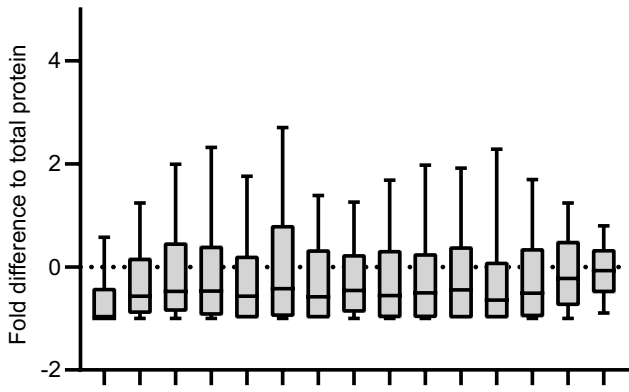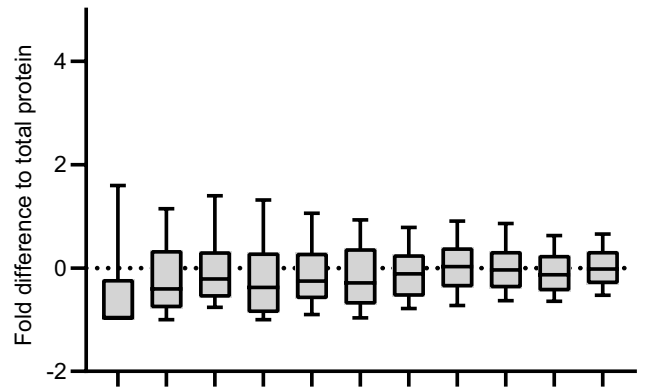

Arc

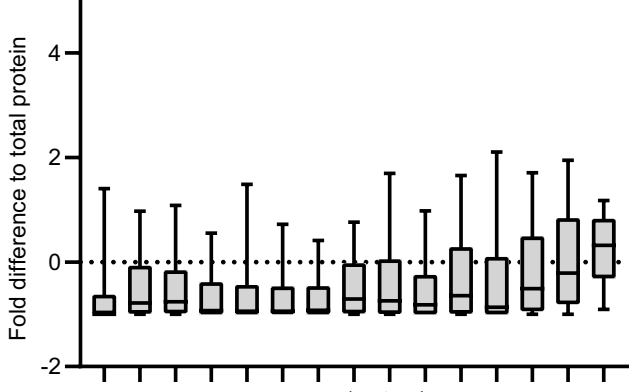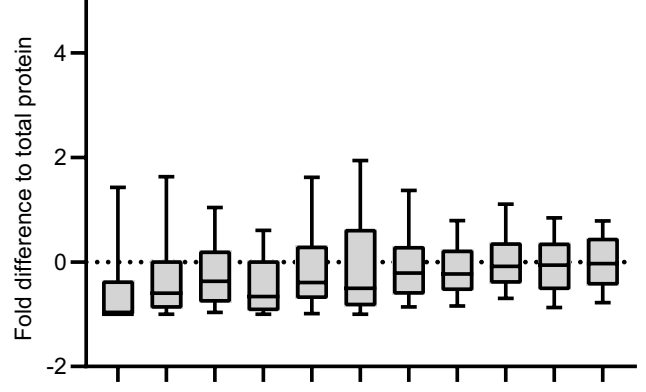

PSD Center  
PSD Central Area  
PSD Outer Area  
Lateral perisynaptic  
Upper perisynaptic  
Top perisynaptic  
Head lateral membrane  
Head lower lateral cytosol  
Membrane lower head  
Neck lateral central head  
Neck lateral cytosol  
Neck central cytosol  
Neck bottom membrane  
Neck root cytosol  
Shaft base cytosol

PSD Center  
PSD Central Area  
PSD Outer Area  
Lateral perisynaptic  
Proximal perisynaptic  
Distal perisynaptic  
First ring  
Second ring  
Third ring  
Fourth ring  
Fifth ring



## BDNF

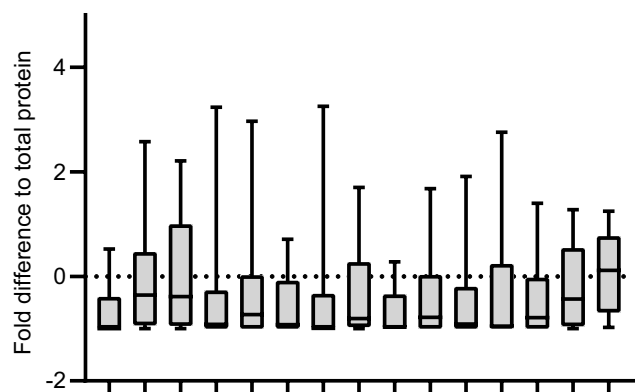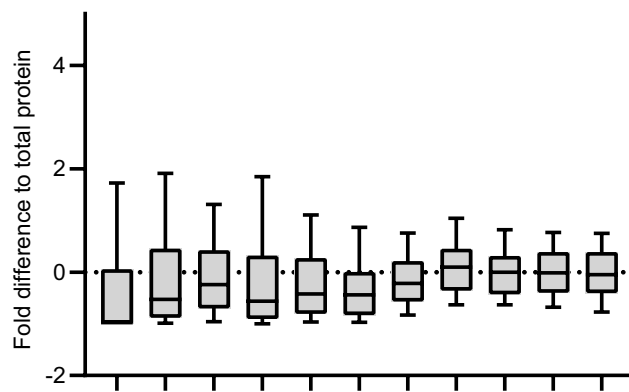

## $\beta$ -2-spectrin

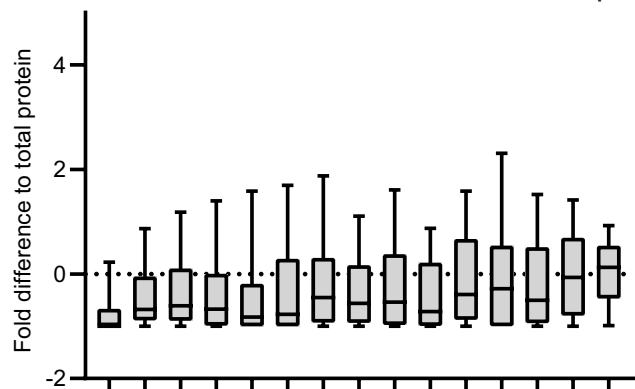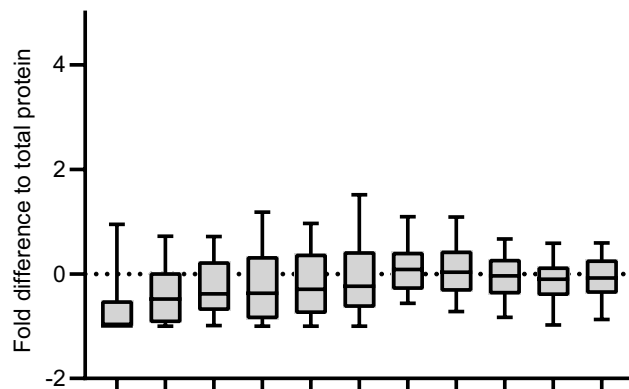

## $\beta$ -3-tubulin

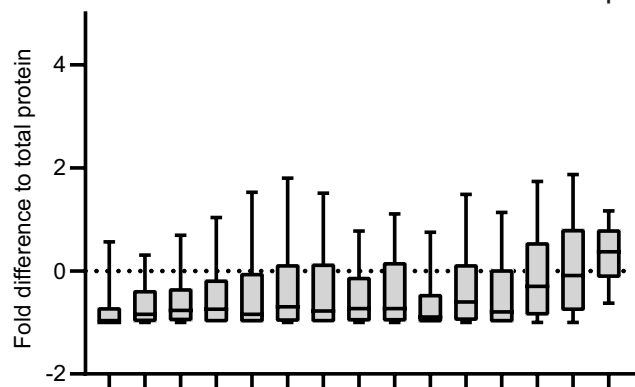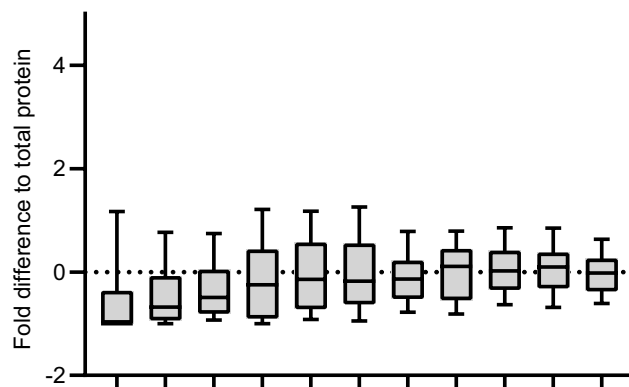

## $\beta$ -tubulin

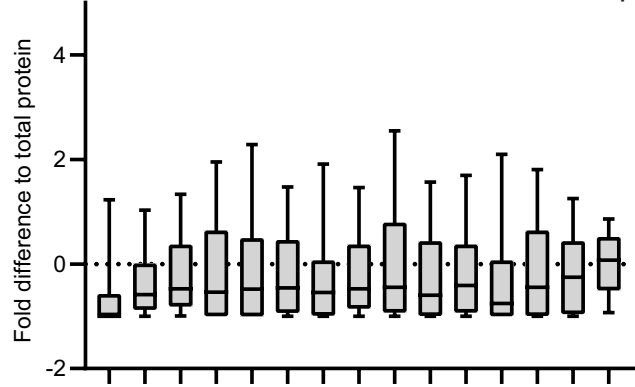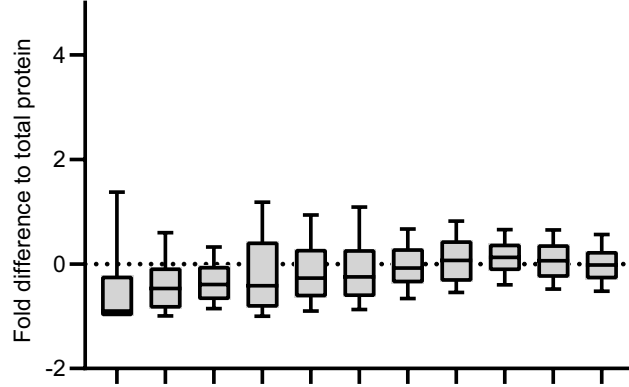

PSD Center  
PSD Central Area  
PSD Outer Area  
Lateral perisynaptic  
Upper perisynaptic  
Top perisynaptic  
Head lateral membrane  
Head lower lateral cytosol  
Membrane lower head  
Neck lateral cytosol  
Neck central cytosol  
Neck bottom membrane  
Neck root cytosol  
Shaft base cytosol  
Shaft base cytosol

PSD Center  
PSD Central Area  
PSD Outer Area  
Lateral perisynaptic  
Proximal perisynaptic  
Distal perisynaptic  
First ring  
Second ring  
Third ring  
Fourth ring  
Fifth ring

Calbindin-D28K

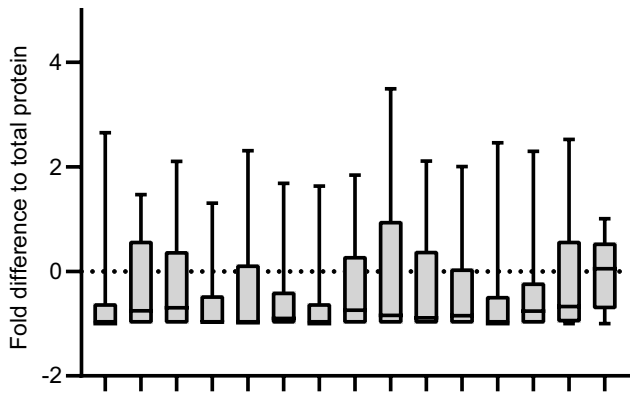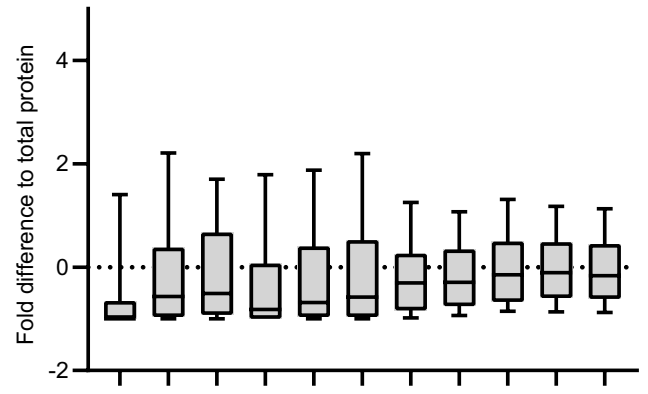

Calcineurin

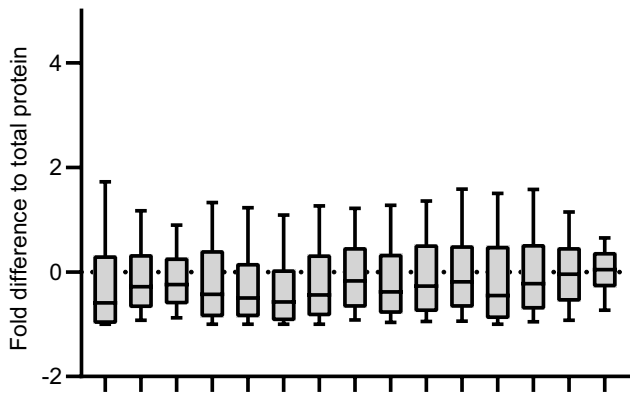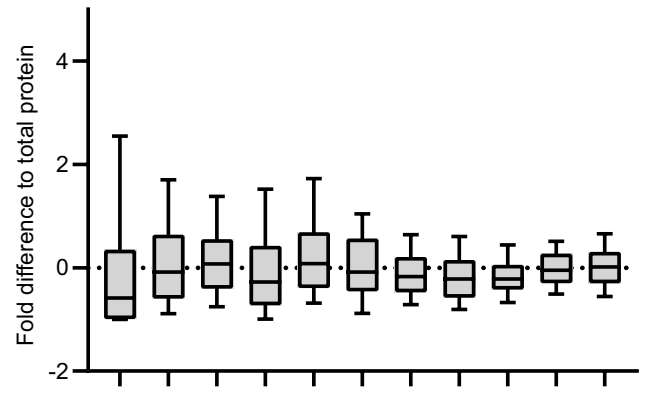

Calmodulin

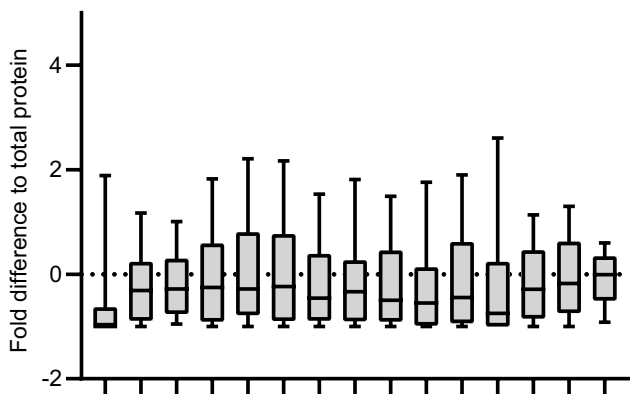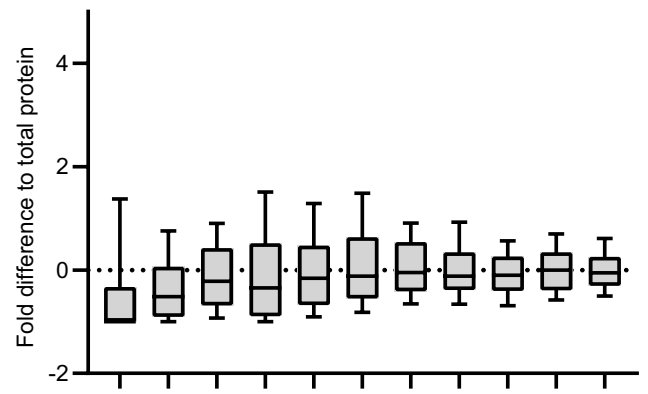

Calreticulin

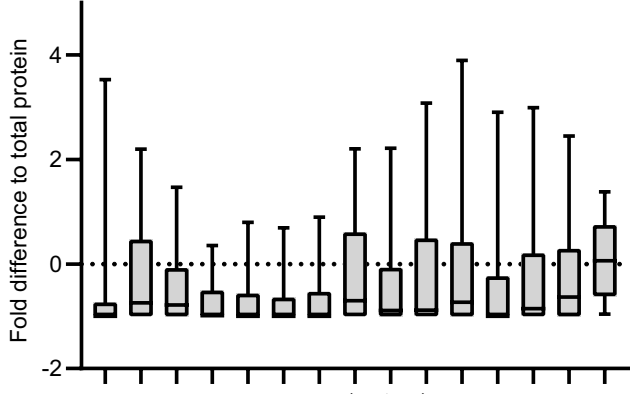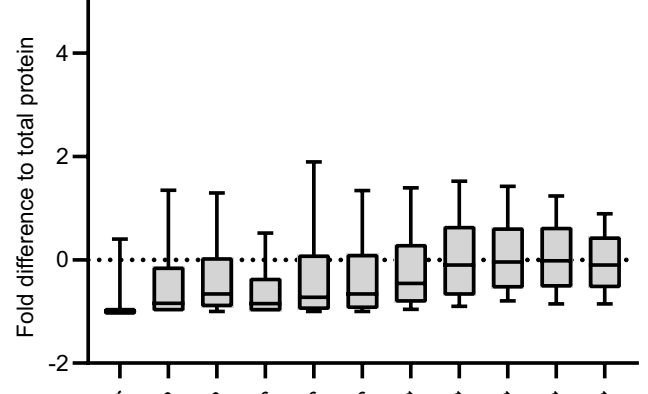

PSD Center  
PSD Central Area  
PSD Outer Area  
Lateral perisynaptic  
Upper perisynaptic  
Top perisynaptic  
Head lateral membrane  
Head lower lateral membrane  
Lower head central cytosol  
Neck lateral cytosol  
Neck central cytosol  
Neck bottom membrane  
Neck root cytosol  
Shaft base cytosol  
Shaft base cytosol

PSD Center  
PSD Central Area  
PSD Outer Area  
Lateral perisynaptic  
Proximal perisynaptic  
Distal perisynaptic  
First ring  
Second ring  
Third ring  
Fourth ring  
Fifth ring

## Calretinin

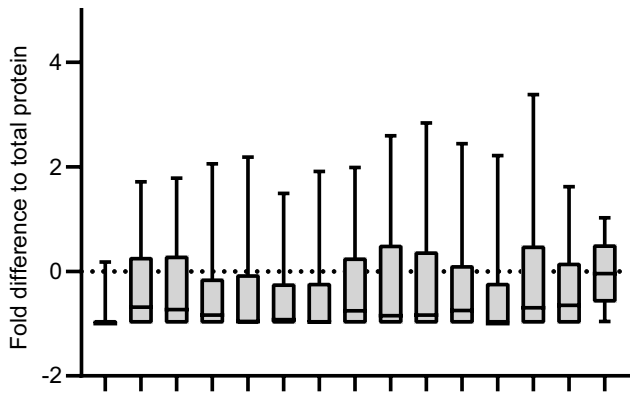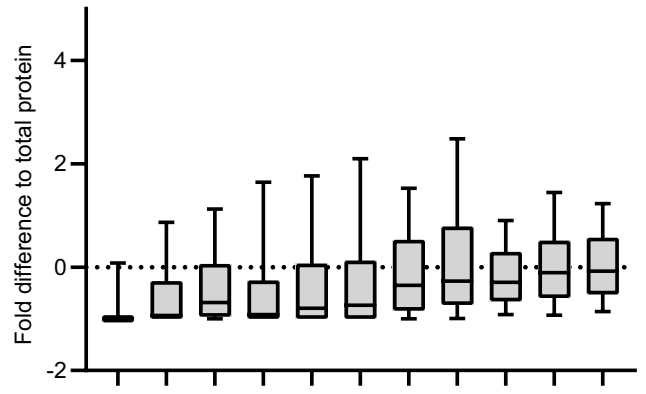CamKII  $\alpha/\beta$ 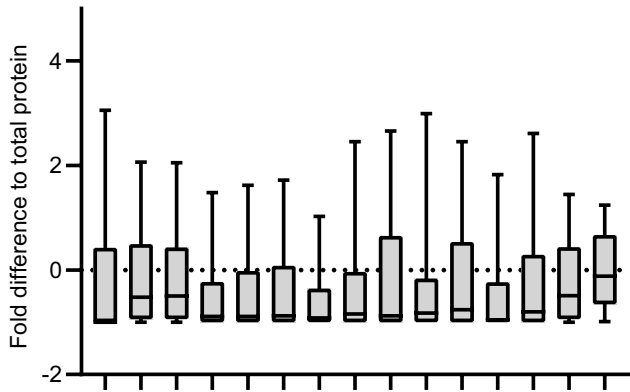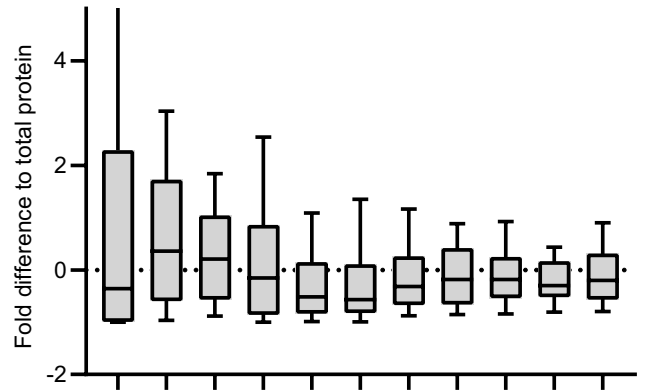

## CAPS1

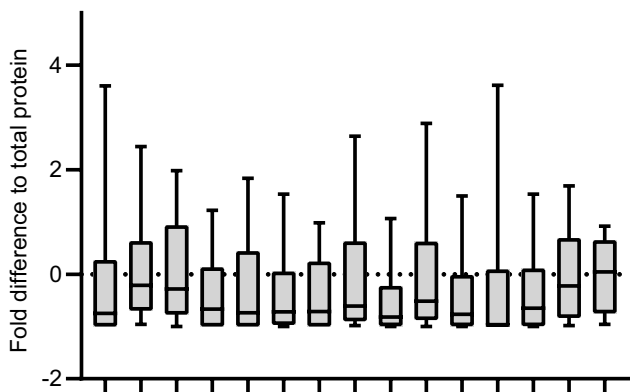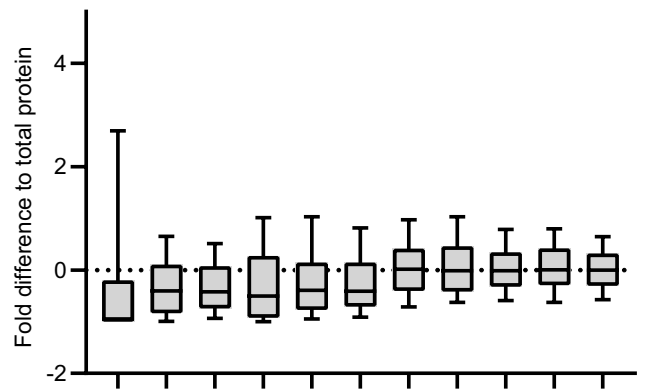

Ca<sub>v</sub>1.3

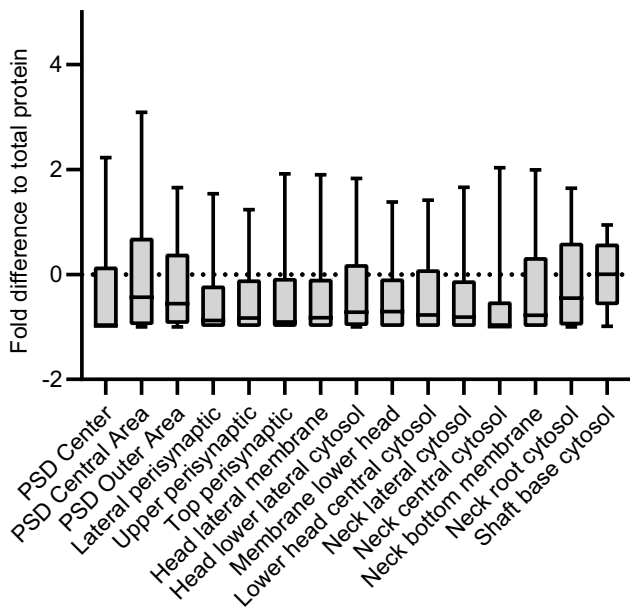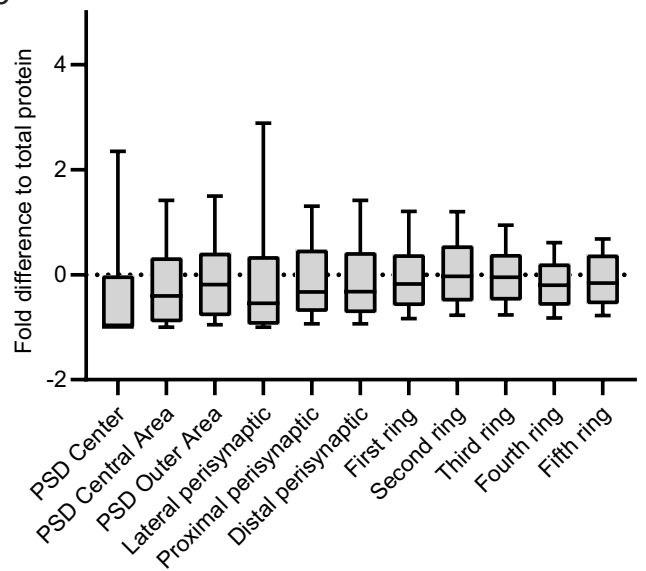



Ca<sub>v</sub>2.1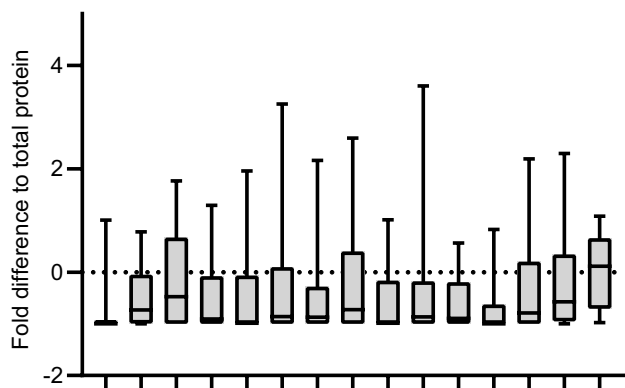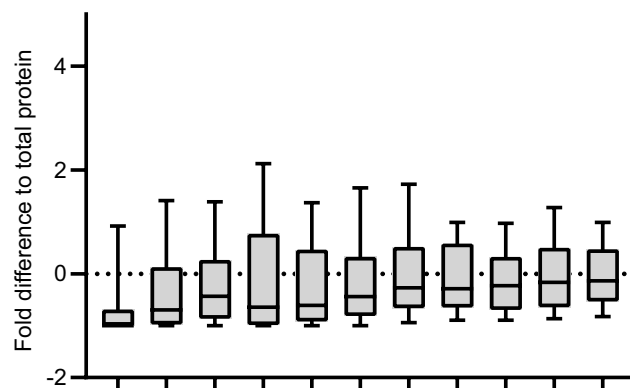

CDC42

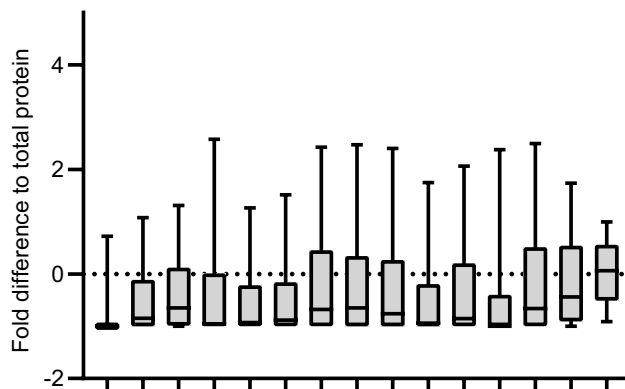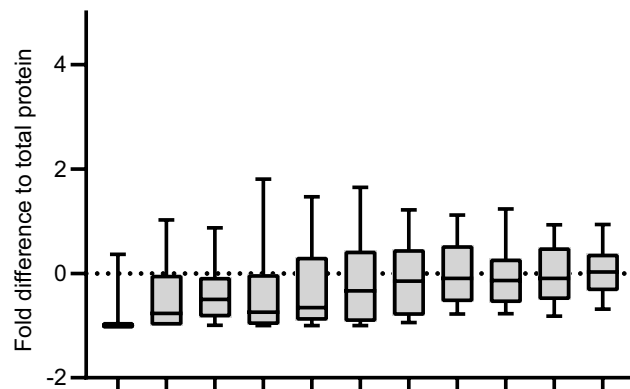

Chromogranin A

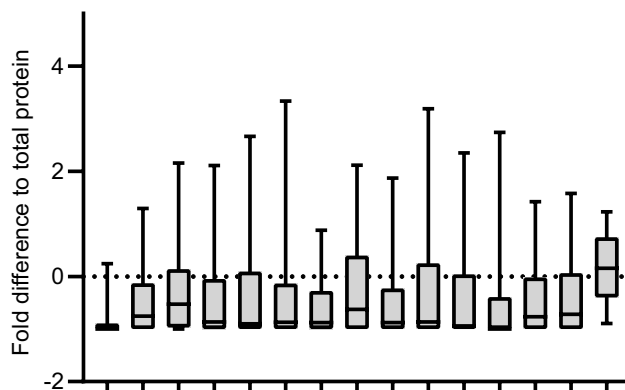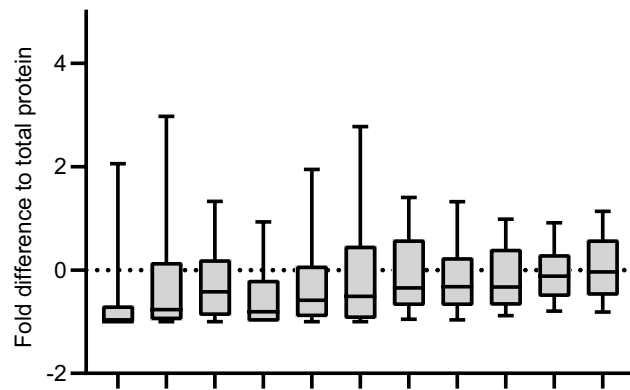

Chromogranin B

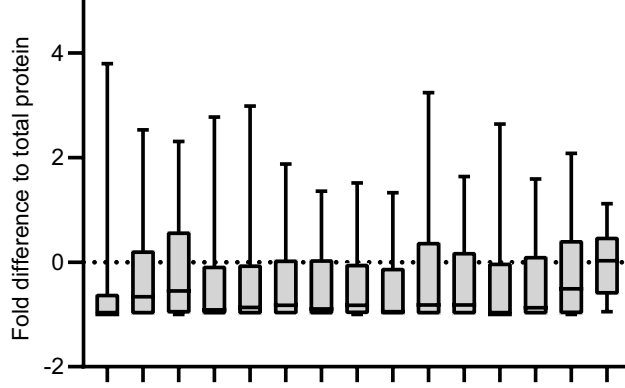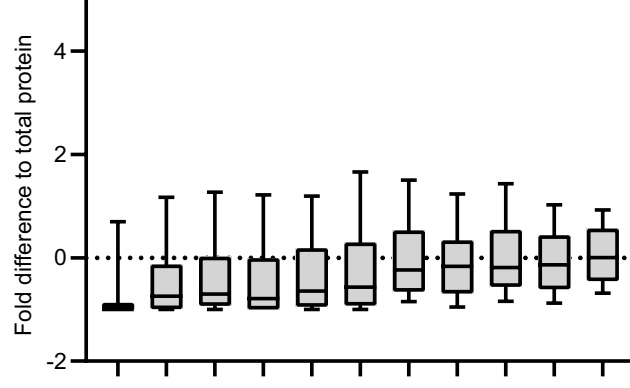

PSD Center  
 PSD Central Area  
 PSD Outer Area  
 Lateral perisynaptic  
 Upper perisynaptic  
 Top lateral membrane  
 Head lower lateral cytosol  
 Head lateral cytosol  
 Membrane lower head  
 Lower head central cytosol  
 Neck lateral cytosol  
 Neck bottom membrane  
 Neck root cytosol  
 Shaft base cytosol

PSD Center  
 PSD Central Area  
 PSD Outer Area  
 Lateral perisynaptic  
 Proximal perisynaptic  
 Distal perisynaptic  
 First ring  
 Second ring  
 Third ring  
 Fourth ring  
 Fifth ring

### Chromogranin C

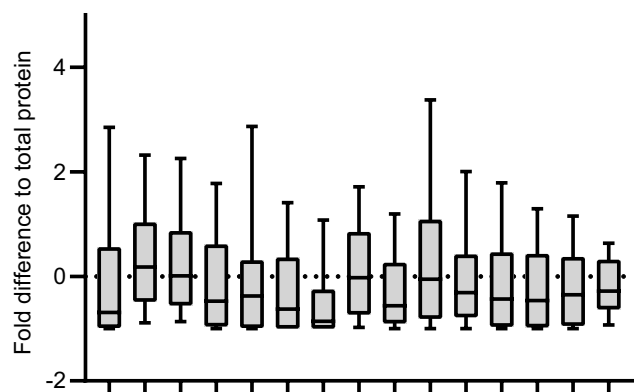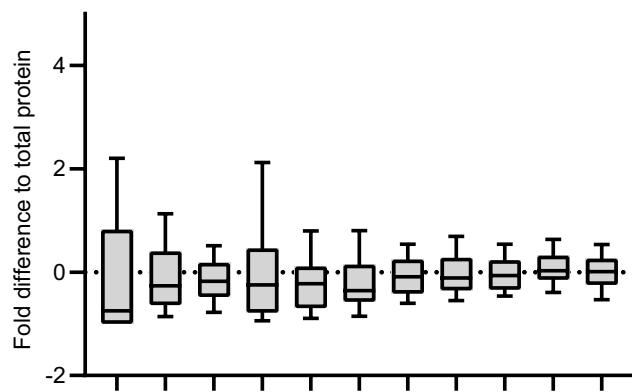

### Clathrin heavy chain

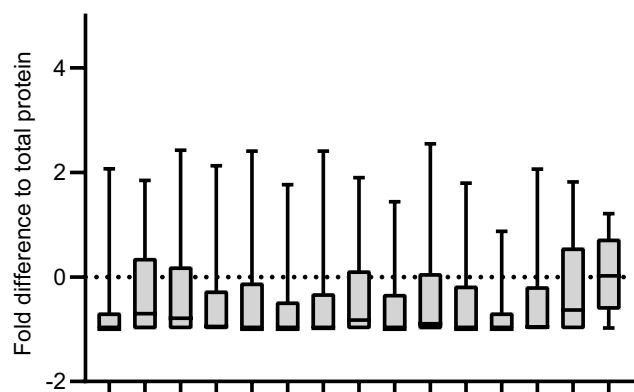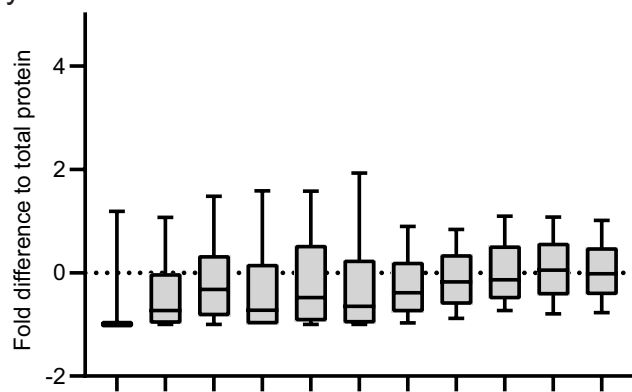

### Clathrin light chain

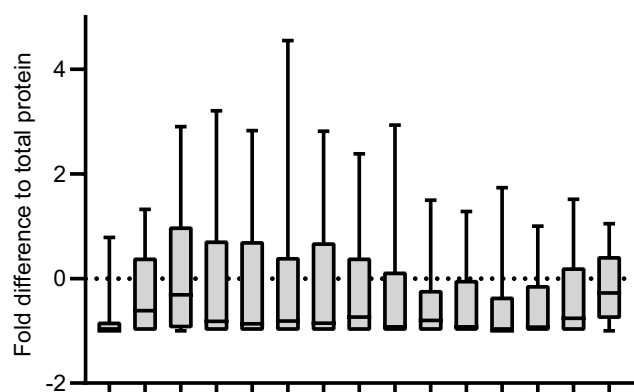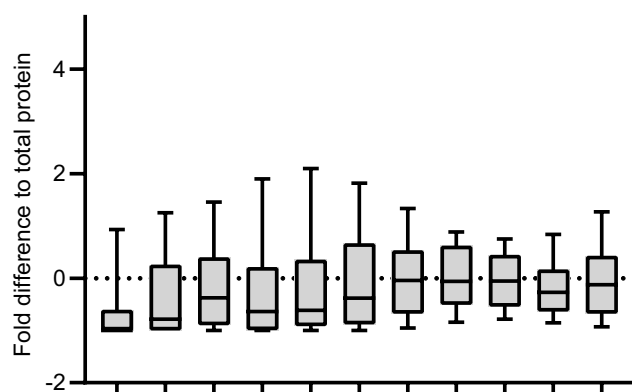

### Cortactin

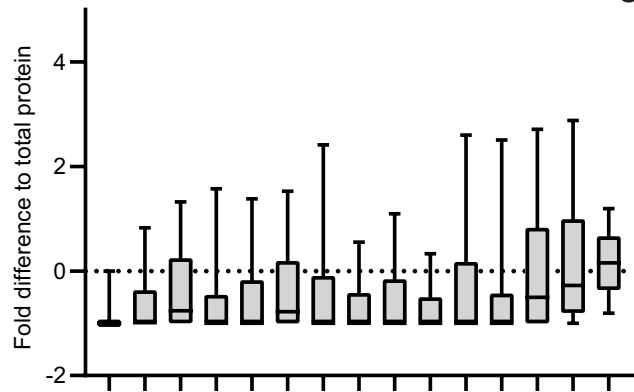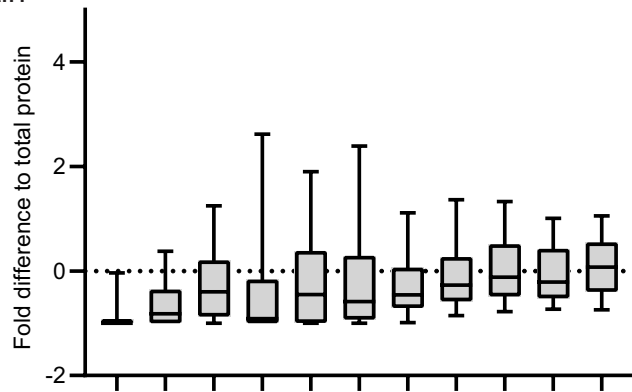

PSD Center  
PSD Central Area  
PSD Outer Area  
Lateral perisynaptic  
Upper perisynaptic  
Top perisynaptic  
Head lateral membrane  
Head lower lateral cytosol  
Membrane lower head  
Neck lateral cytosol  
Neck central cytosol  
Neck bottom cytosol  
Neck root cytosol  
Neck base cytosol  
Shaft base cytosol

PSD Center  
PSD Central Area  
PSD Outer Area  
Lateral perisynaptic  
Upper perisynaptic  
Top perisynaptic  
Head lateral membrane  
Head lower lateral cytosol  
Membrane lower head  
Neck lateral cytosol  
Neck central cytosol  
Neck bottom cytosol  
Neck root cytosol  
Neck base cytosol  
Shaft base cytosol

### DLGAP1

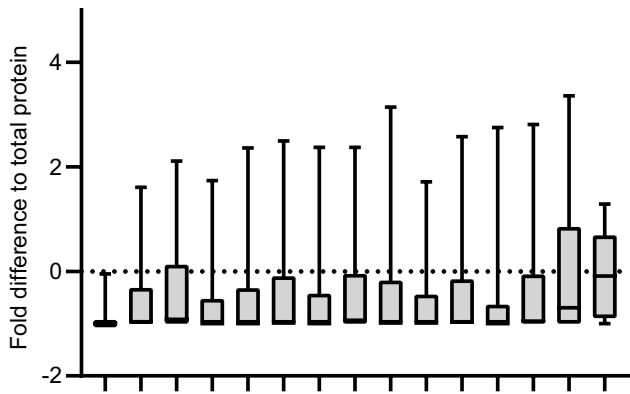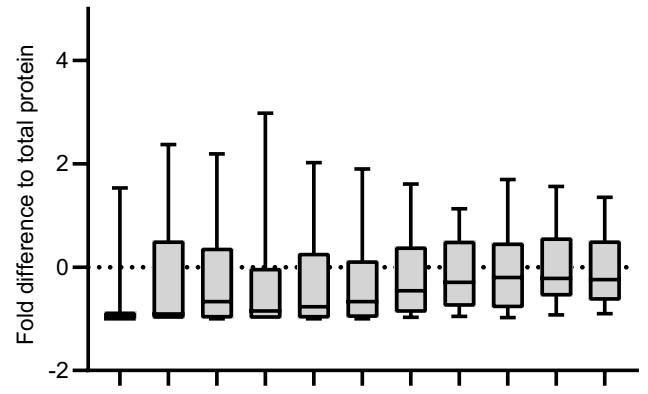

### Dopamine receptor D1

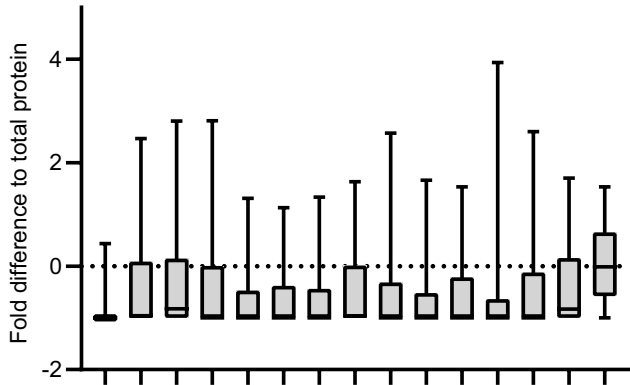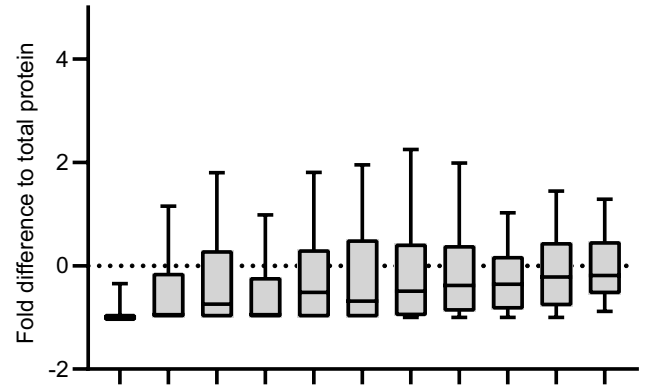

### Dopamine receptor D2

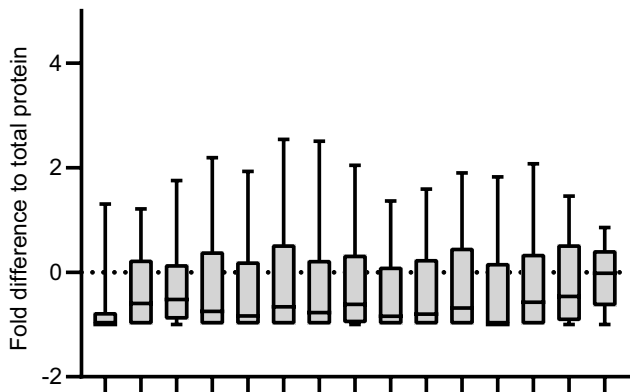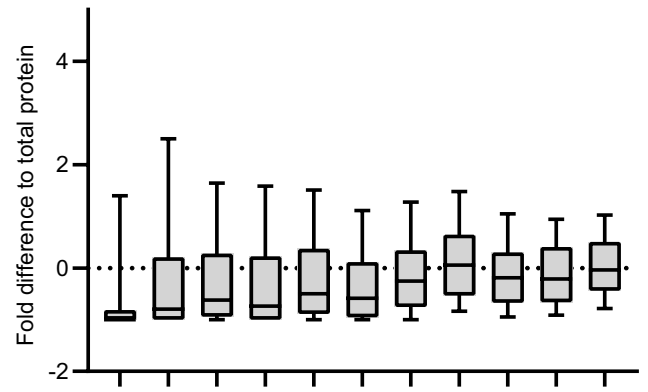

### Drebrin

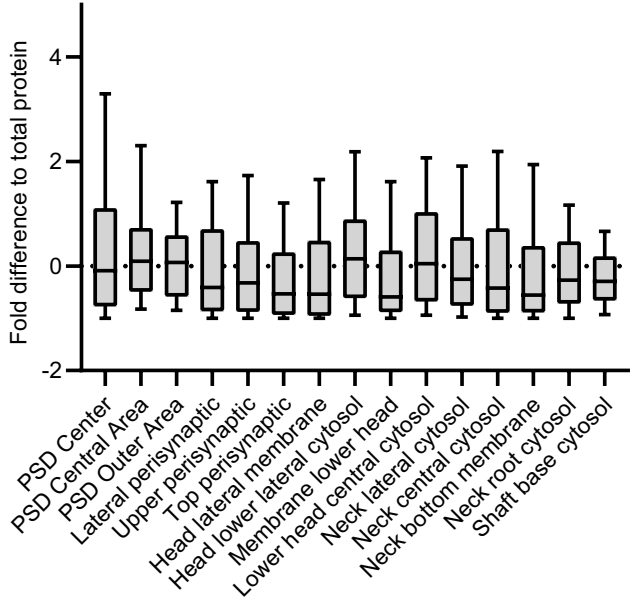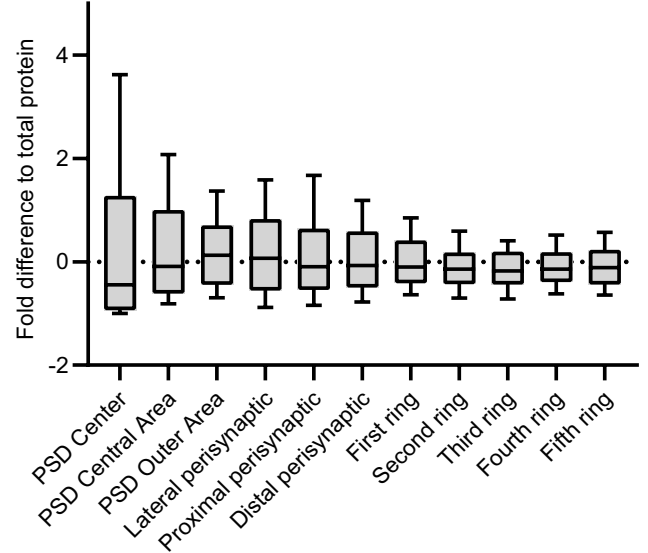



## Dynamin1/2/3

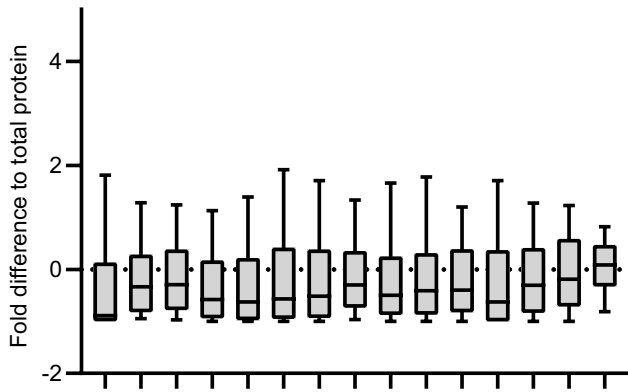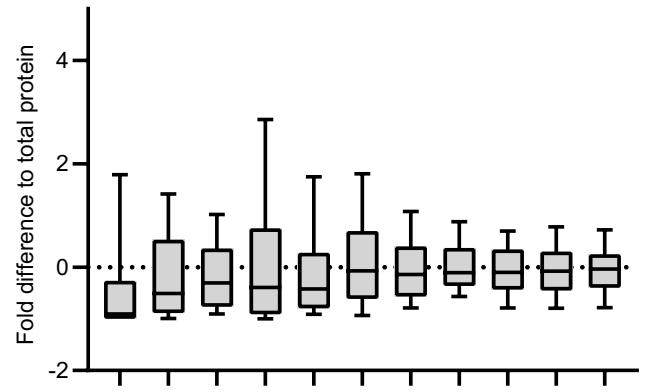

ERp72

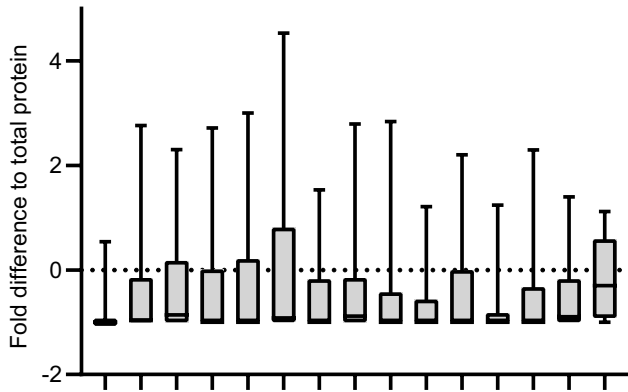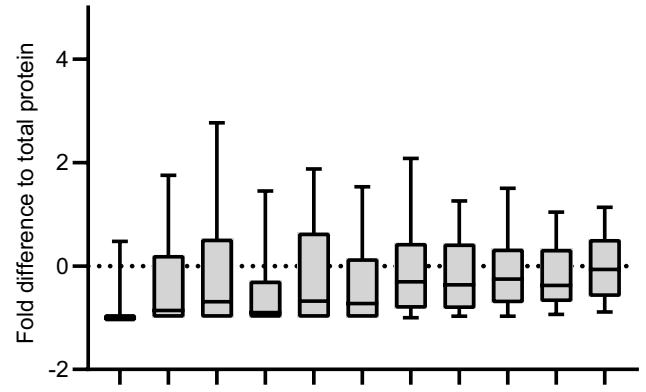

GluK1

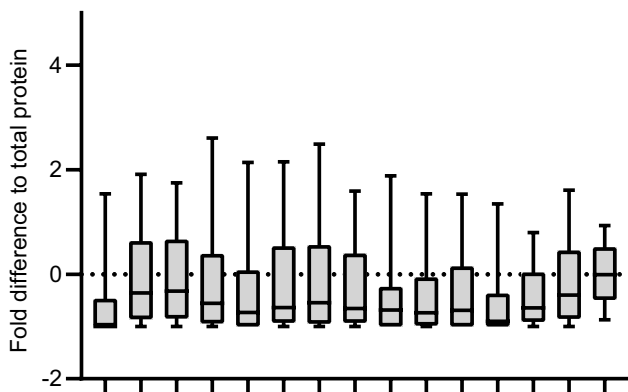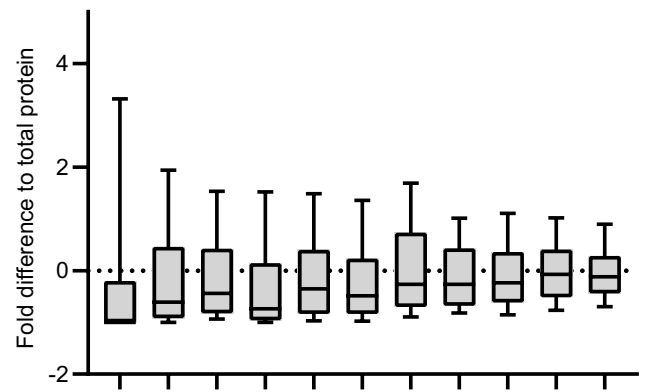

GluN1

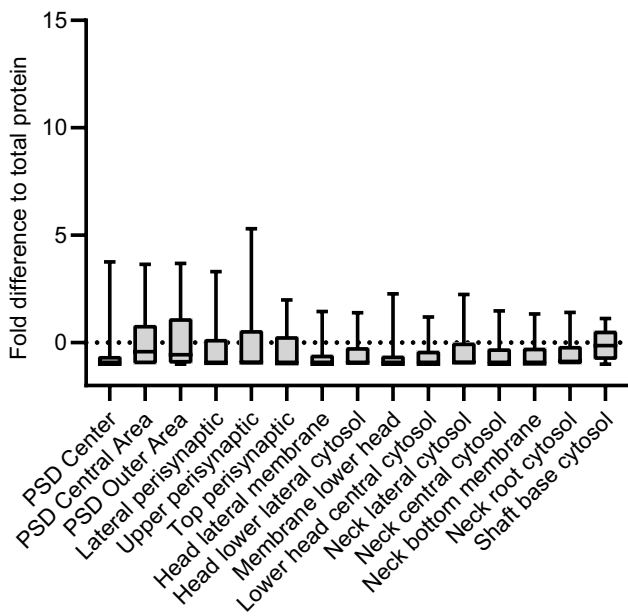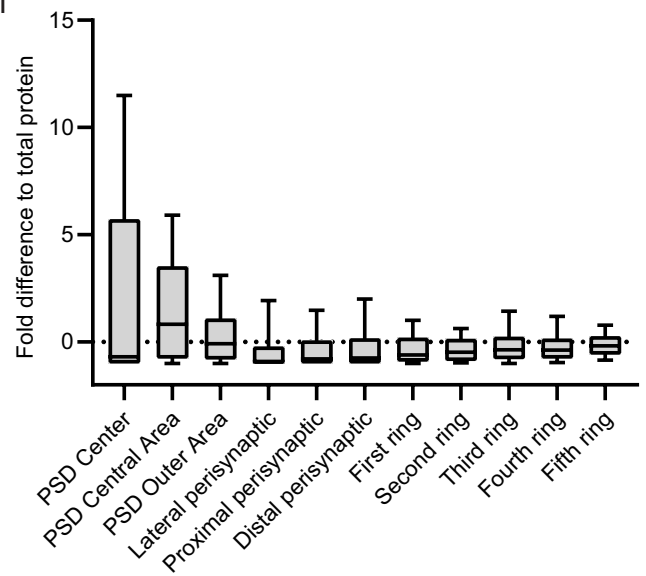

## GluN2A

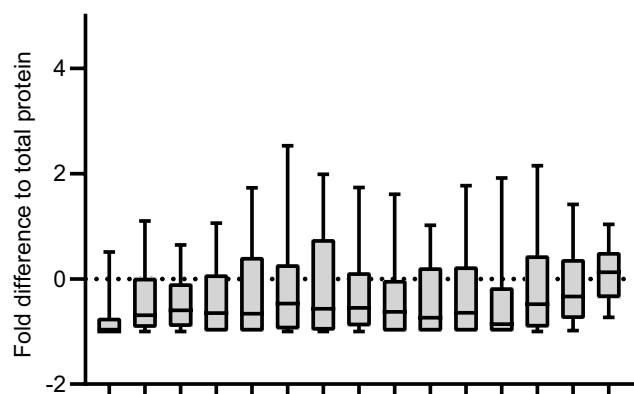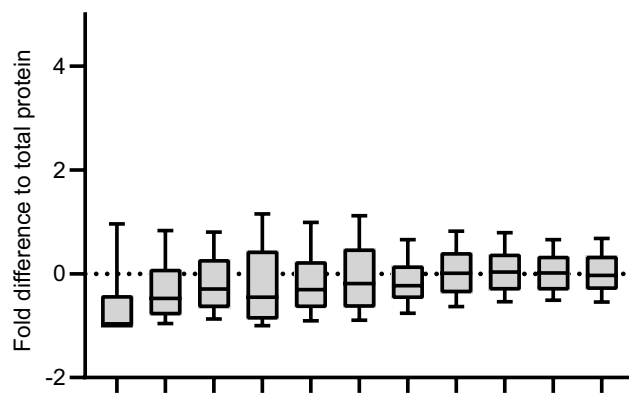

GluN2B

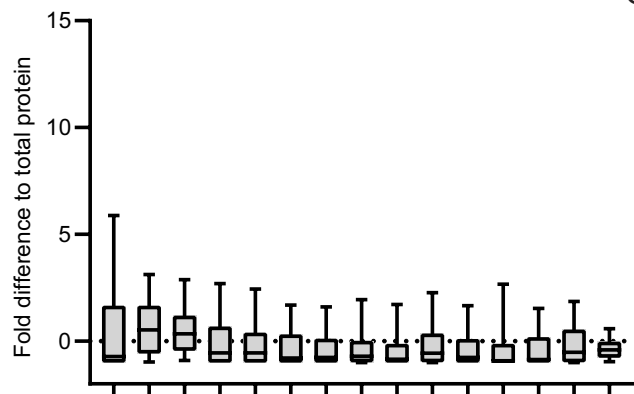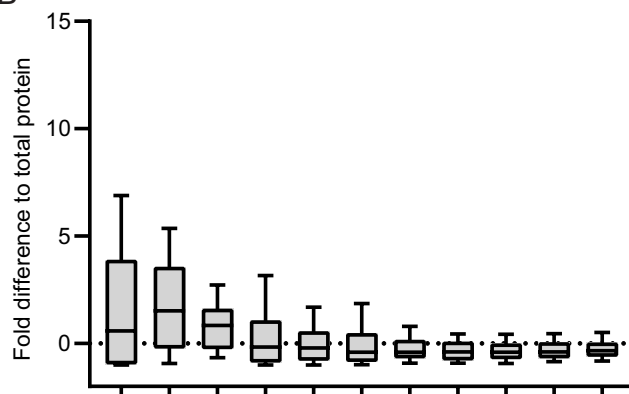

GluR1

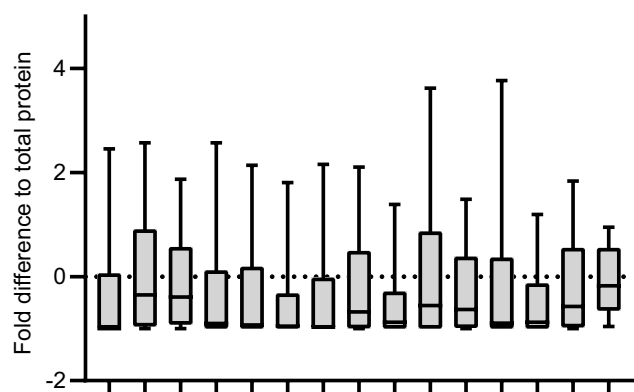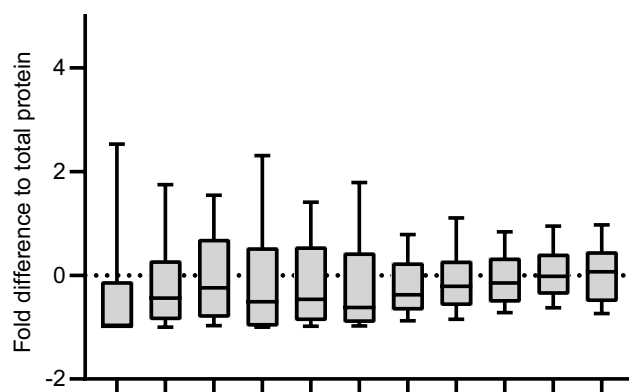

GluR2

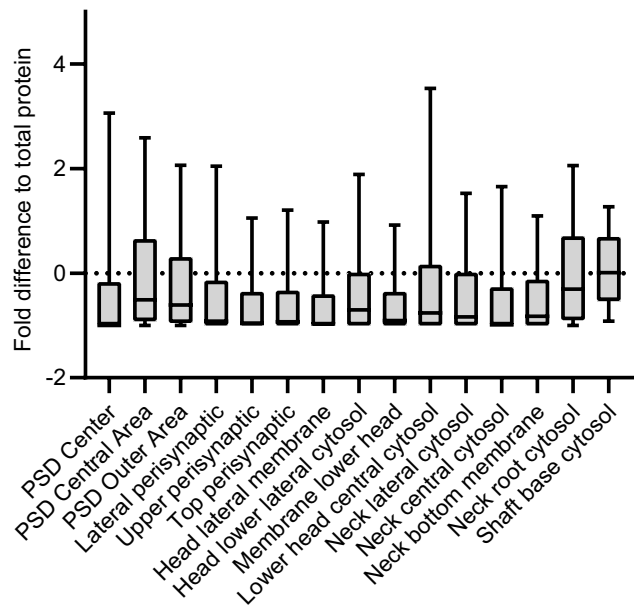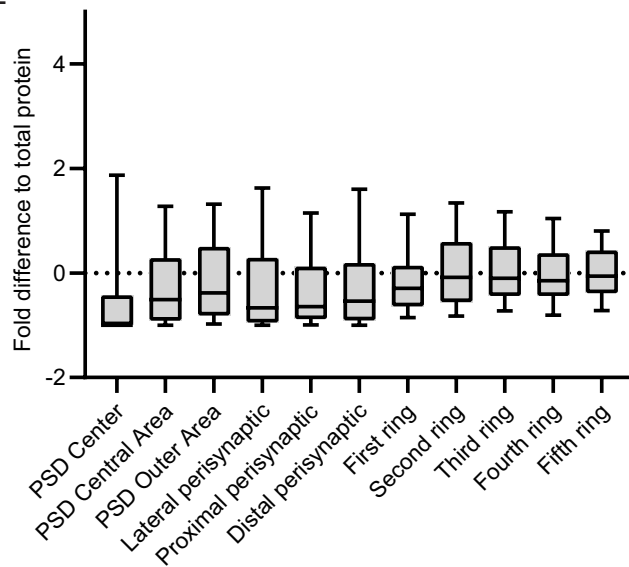

GluR3

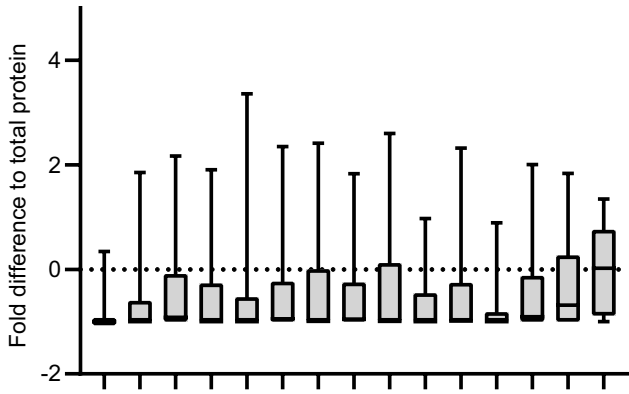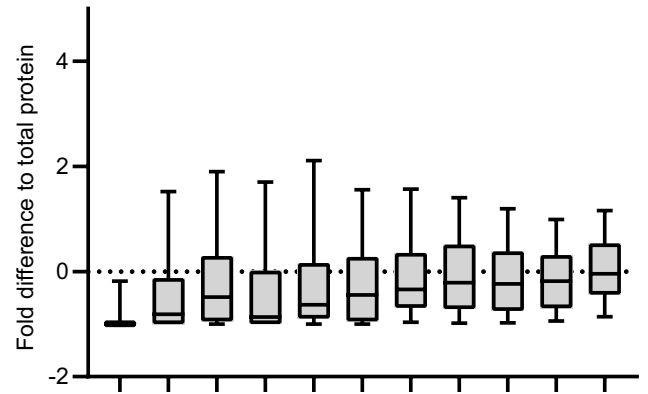

GRIP1/2

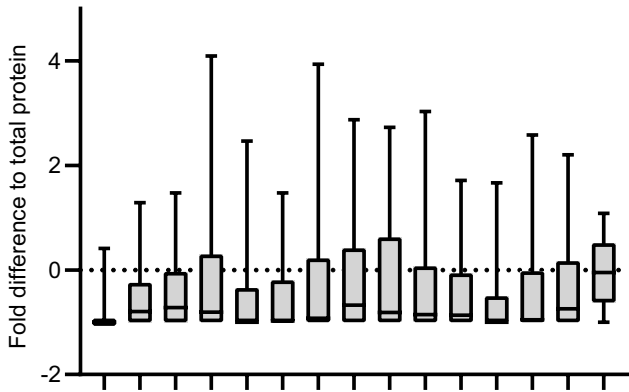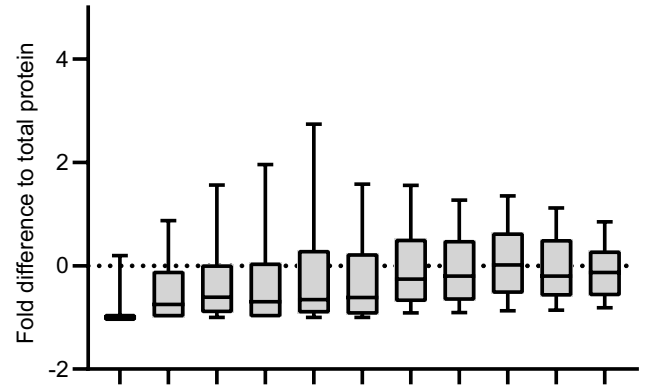

Homer1

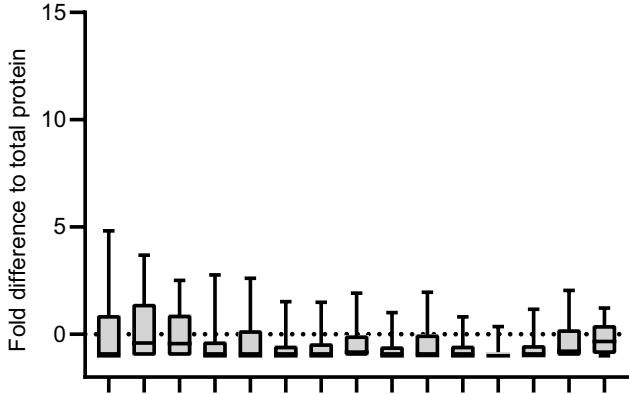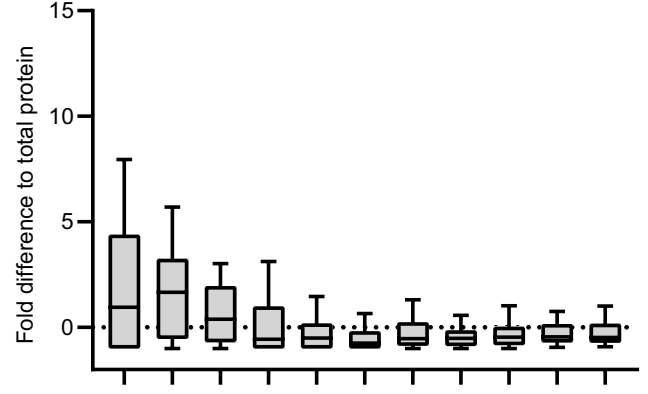

Homer2

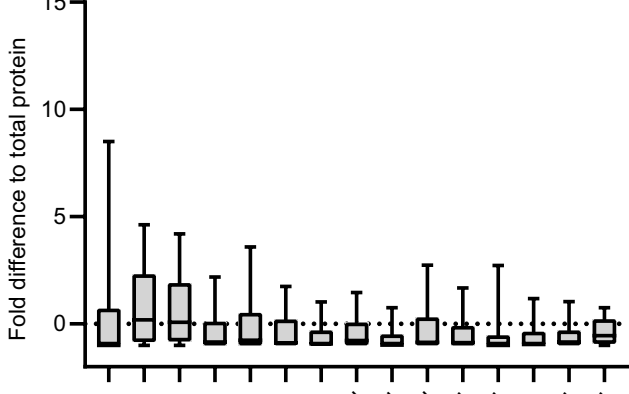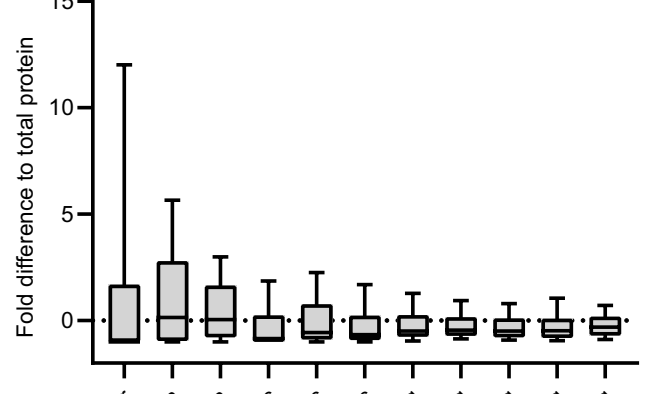

PSD Center  
PSD Central Area  
PSD Outer Area  
Lateral perisynaptic  
Upper perisynaptic  
Top perisynaptic  
Head lateral membrane  
Head lower lateral membrane  
Membrane lower head  
Neck lateral cytosol  
Neck central cytosol  
Neck bottom membrane  
Neck root cytosol  
Shaft base cytosol  
Shaft base cytosol

PSD Center  
PSD Central Area  
PSD Outer Area  
Lateral perisynaptic  
Proximal perisynaptic  
Distal perisynaptic  
First ring  
Second ring  
Third ring  
Fourth ring  
Fifth ring



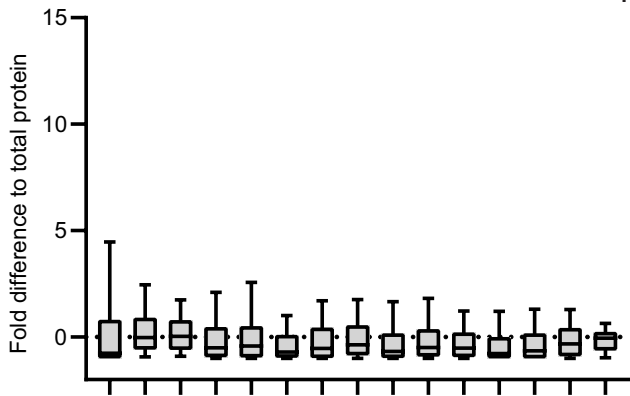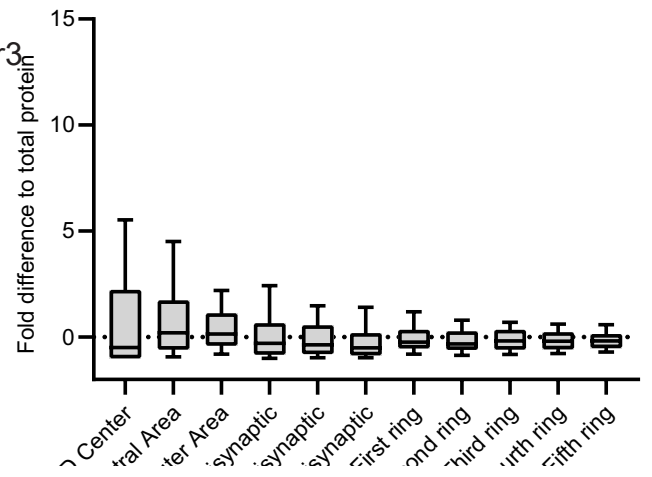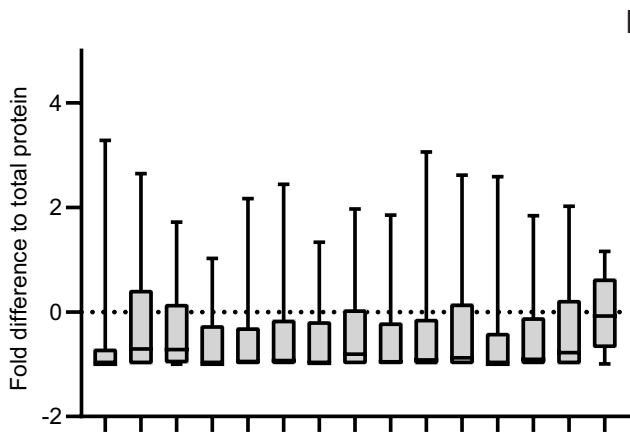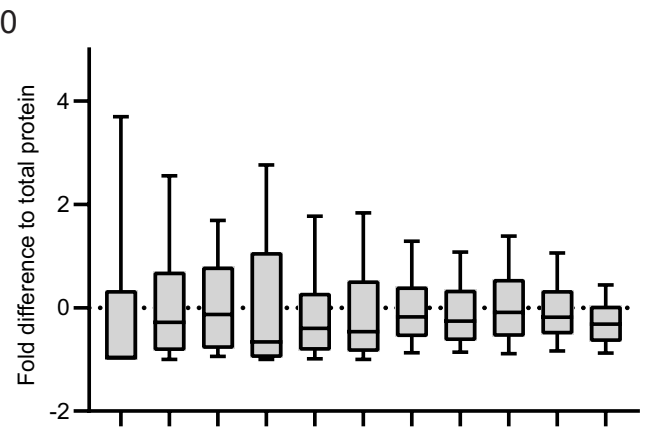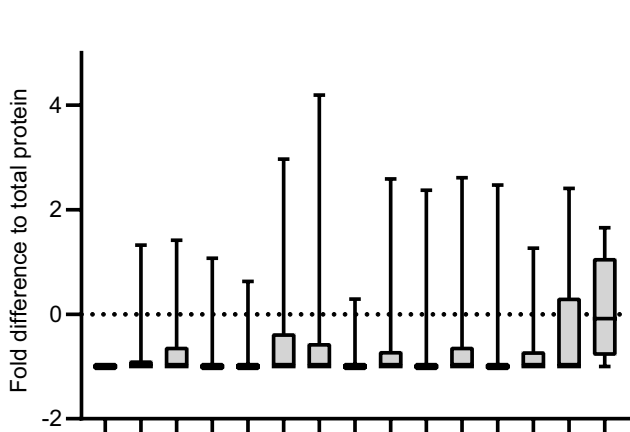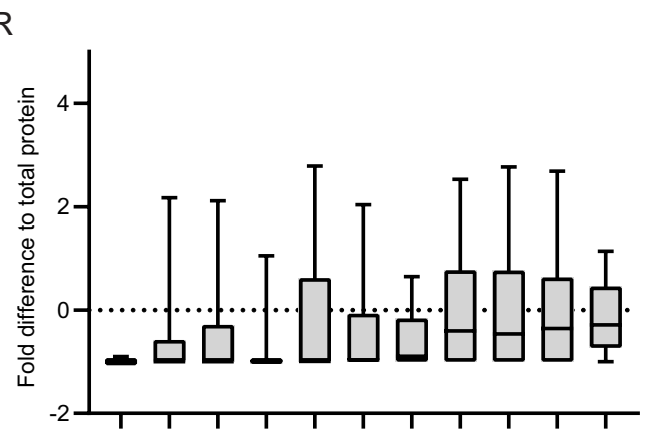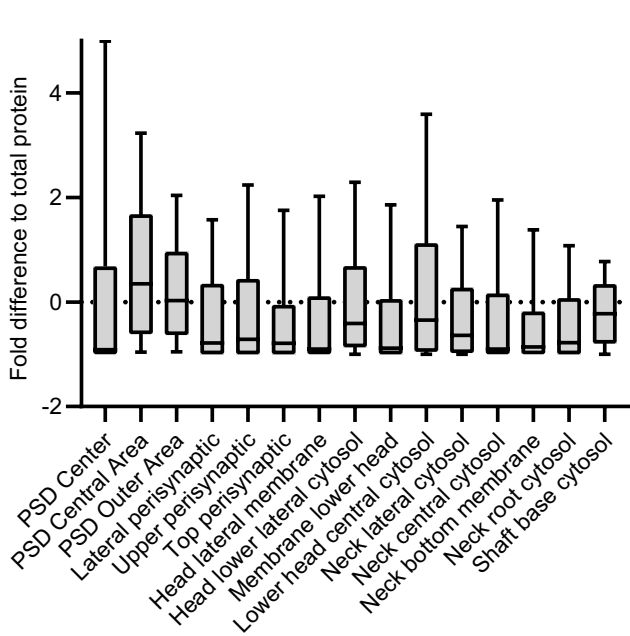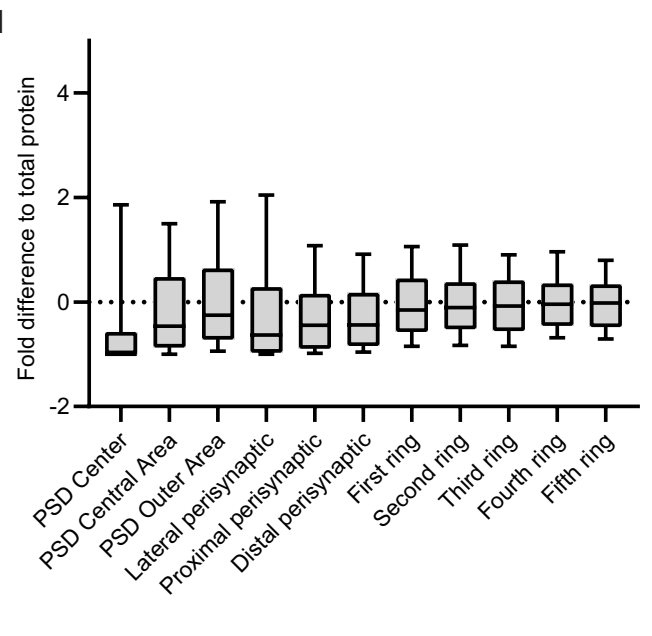

K<sub>v</sub>1.1

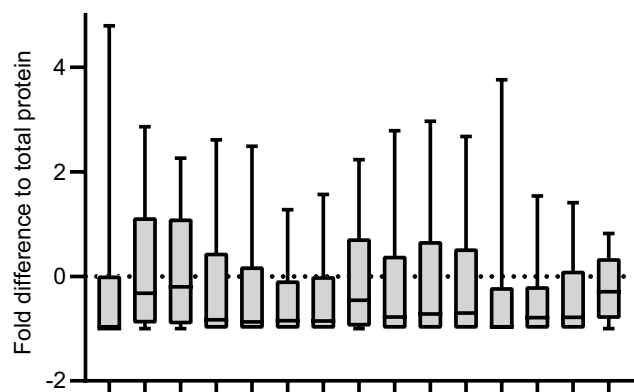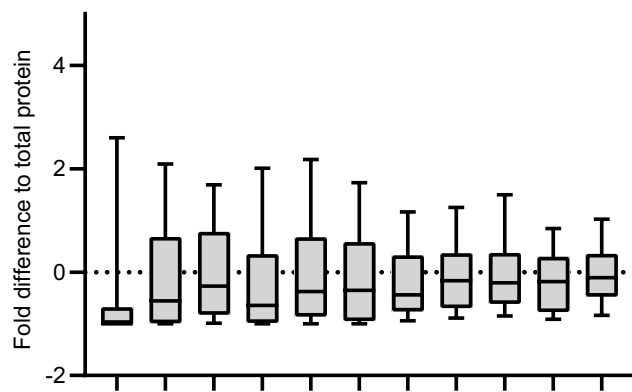

K<sub>v</sub>2.1

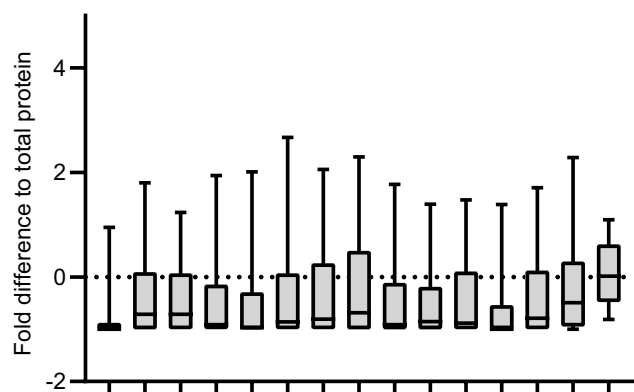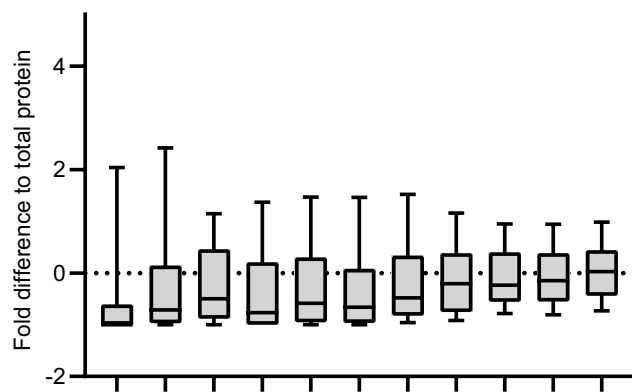

LNGFR

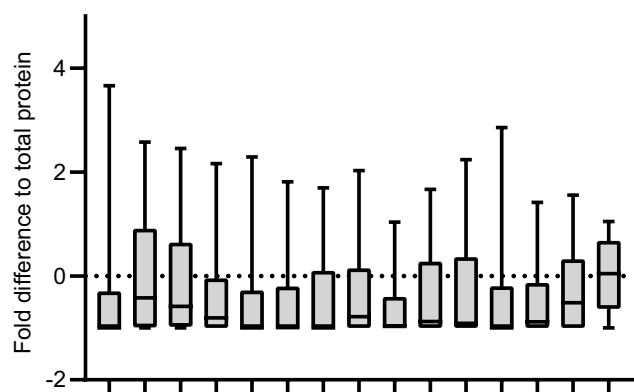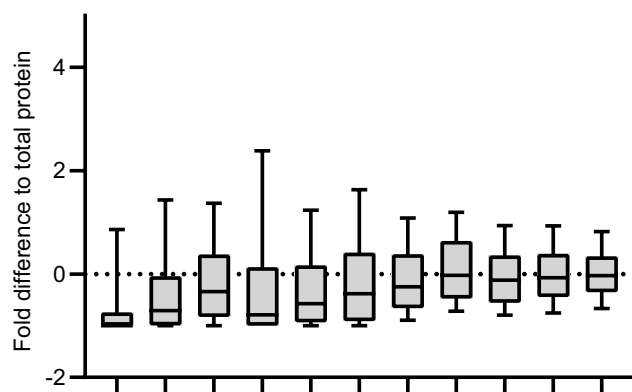

mAChR1

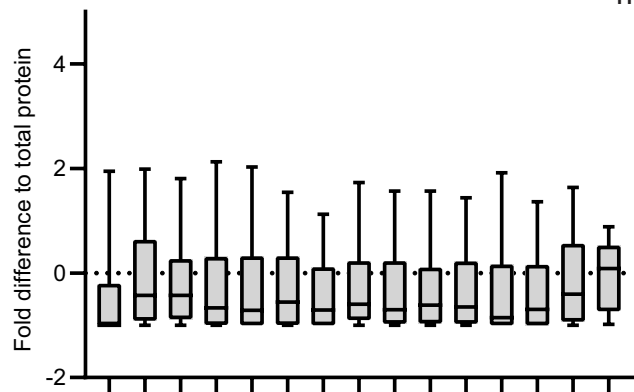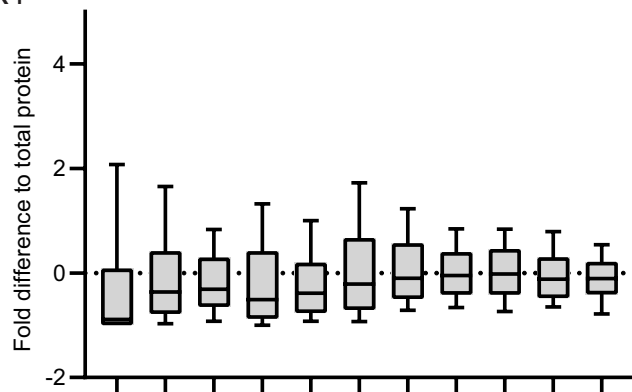

PSD Center  
PSD Central Area  
PSD Outer Area  
Lateral perisynaptic  
Upper perisynaptic  
Top perisynaptic  
Head lateral membrane  
Head lower lateral membrane  
Membrane lower cytosol  
Neck lateral cytosol  
Neck central cytosol  
Neck bottom membrane  
Neck root cytosol  
Shaft root cytosol  
Shaft base cytosol

PSD Center  
PSD Central Area  
PSD Outer Area  
Lateral perisynaptic  
Upper perisynaptic  
Top perisynaptic  
Head lateral membrane  
Head lower lateral membrane  
Membrane lower cytosol  
Neck lateral cytosol  
Neck central cytosol  
Neck bottom membrane  
Neck root cytosol  
Shaft root cytosol  
Shaft base cytosol

## MAP2

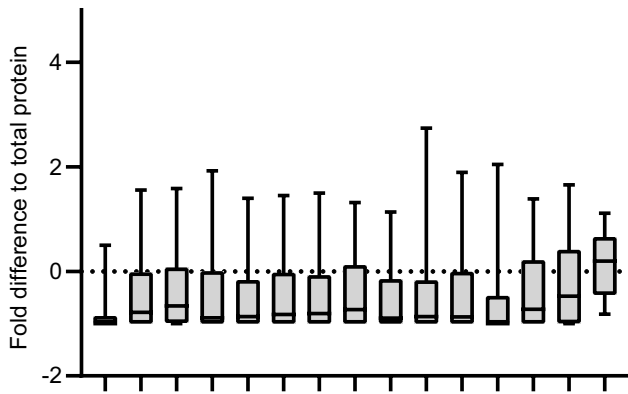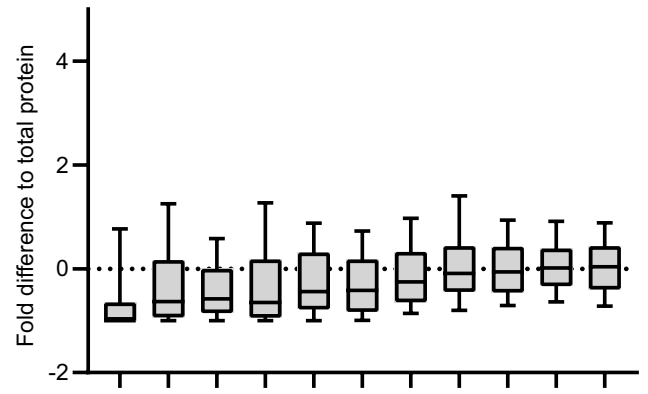

## mGluR1

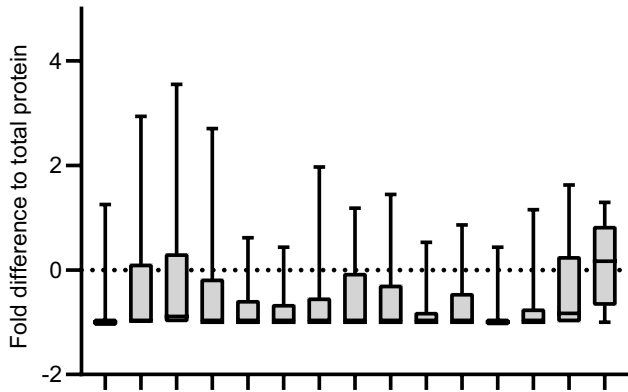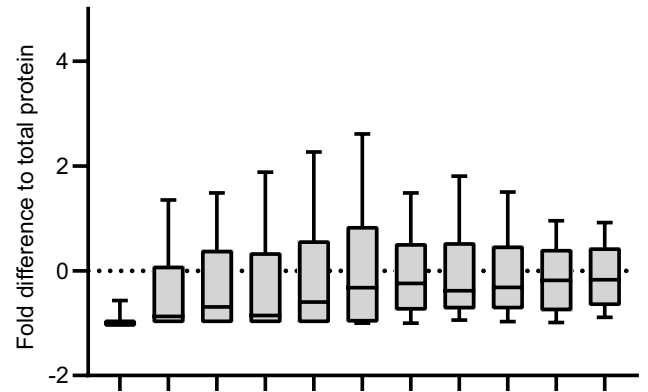

## mGluR2

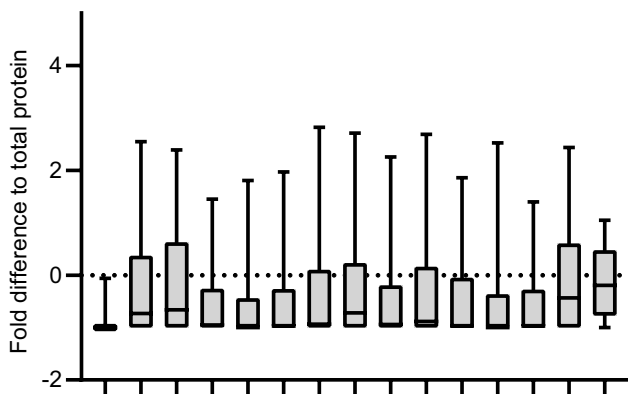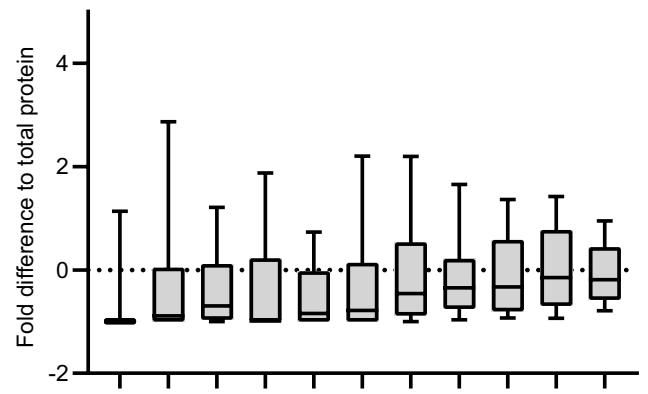

## mGluR5

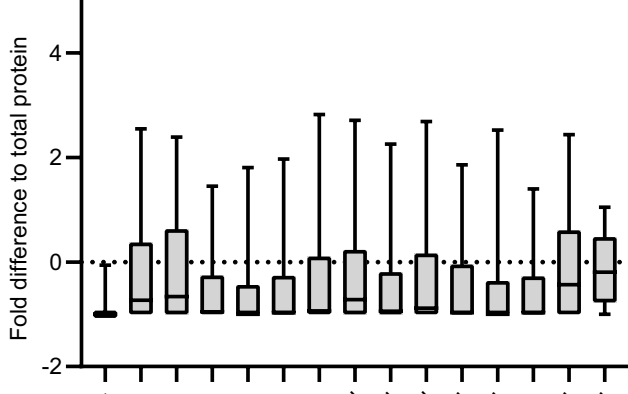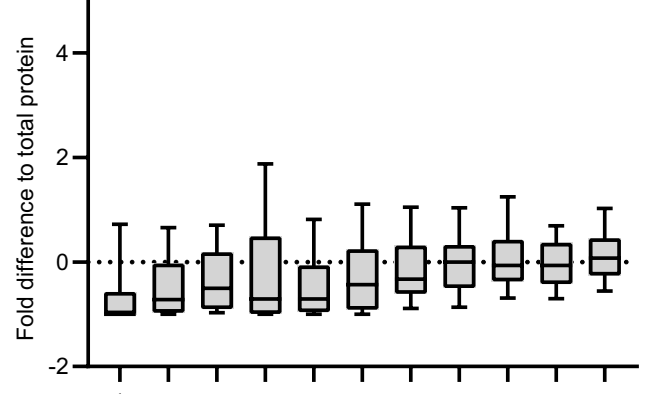

PSD Center  
PSD Central Area  
PSD Outer Area  
Lateral perisynaptic  
Upper perisynaptic  
Head lateral membrane  
Head lower lateral membrane  
Lower head central cytosol  
Neck lateral cytosol  
Neck central cytosol  
Neck bottom membrane  
Neck root cytosol  
Shaft base cytosol

PSD Center  
PSD Central Area  
PSD Outer Area  
Lateral perisynaptic  
Upper perisynaptic  
Head lateral membrane  
Head lower lateral membrane  
Lower head central cytosol  
Neck lateral cytosol  
Neck central cytosol  
Neck bottom membrane  
Neck root cytosol  
Shaft base cytosol  
First ring  
Second ring  
Third ring  
Fourth ring  
Fifth ring



Myosin5a

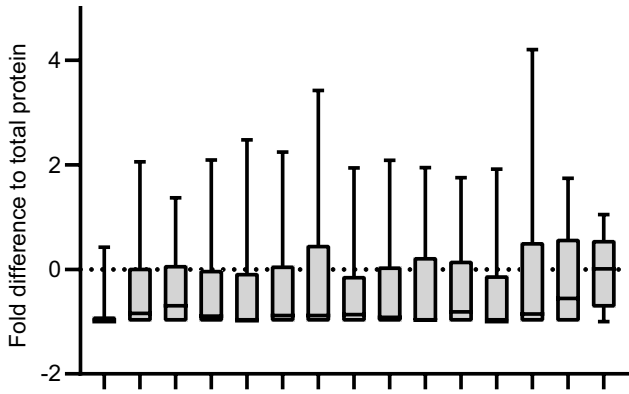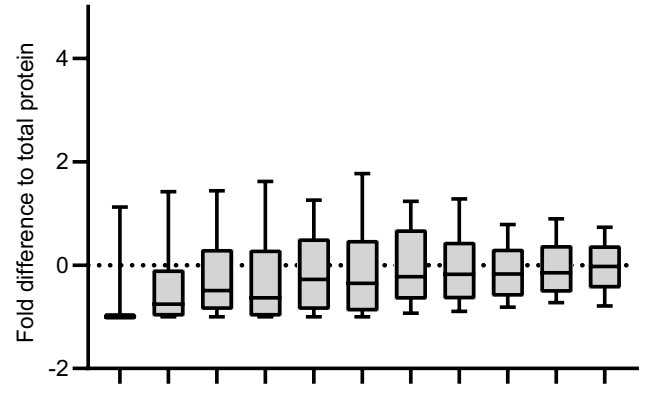

Na  $\beta$  1

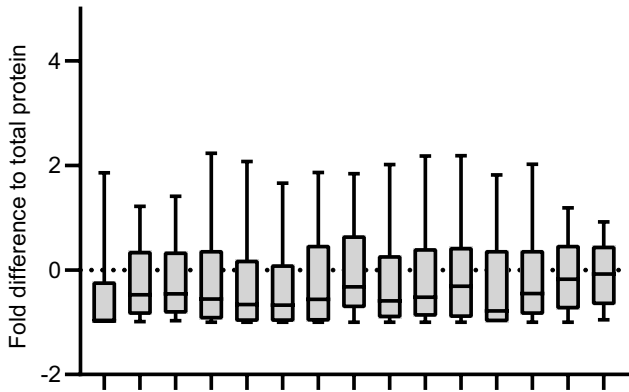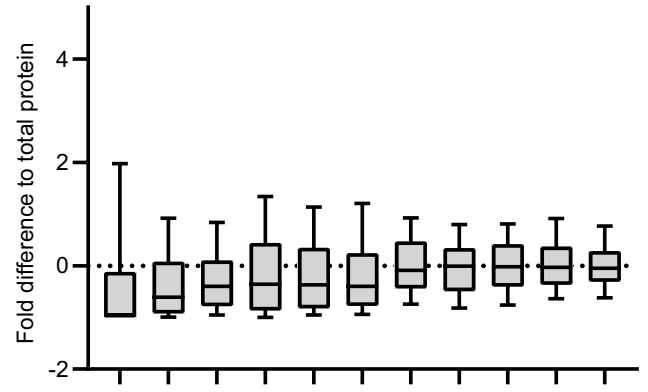

Na<sup>+</sup>/K<sup>+</sup> ATPase

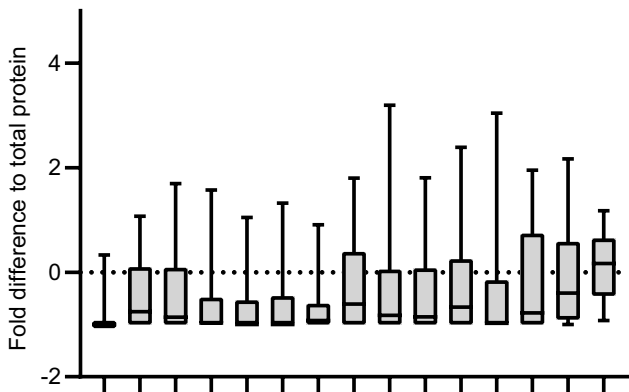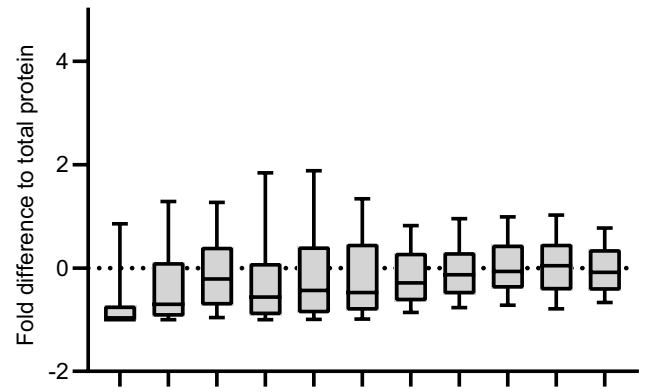

Na<sub>v</sub>1.1

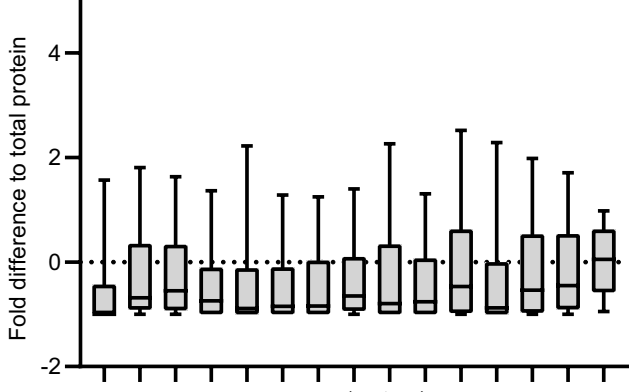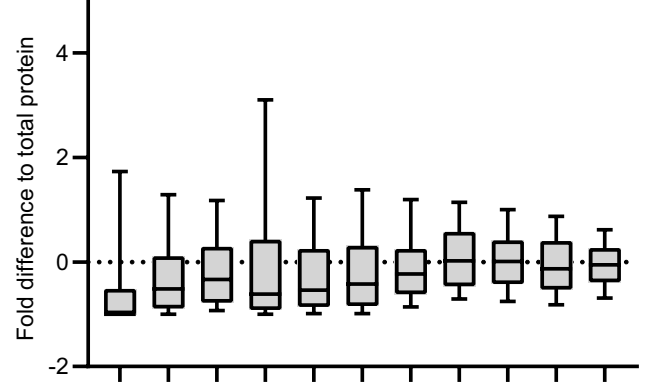

PSD Center  
PSD Central Area  
PSD Outer Area  
Lateral perisynaptic  
Upper perisynaptic  
Top perisynaptic  
Head lateral membrane  
Head lower lateral membrane  
Membrane lower cytosol  
Lower head central cytosol  
Neck lateral cytosol  
Neck central cytosol  
Neck bottom membrane  
Neck root cytosol  
Shaft base cytosol

PSD Center  
PSD Central Area  
PSD Outer Area  
Lateral perisynaptic  
Proximal perisynaptic  
Distal perisynaptic  
First ring  
Second ring  
Third ring  
Fourth ring  
Fifth ring

Na<sub>v</sub>1.3

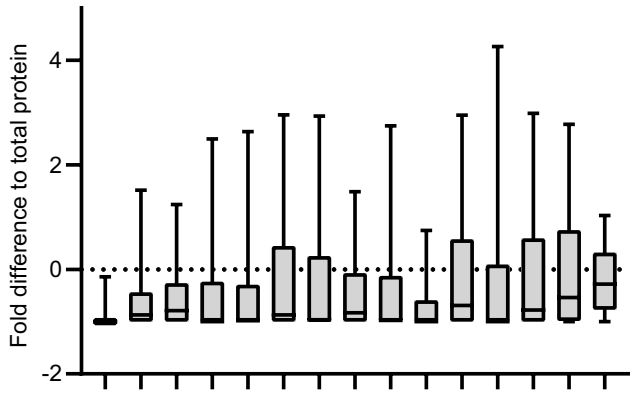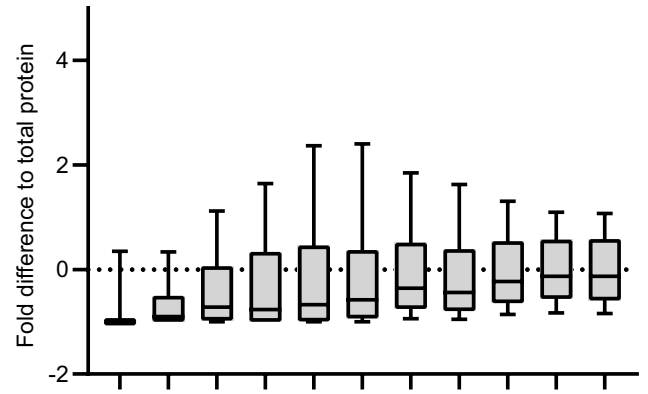

Neurofilament H

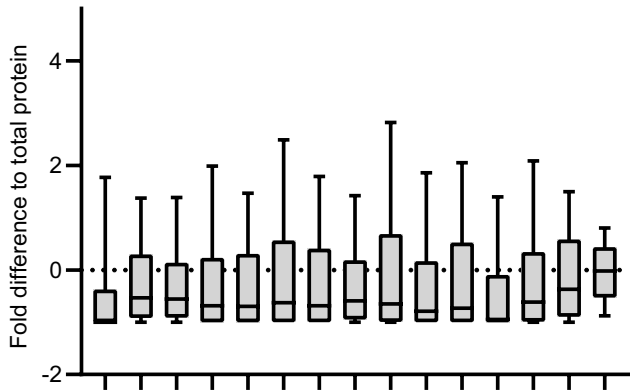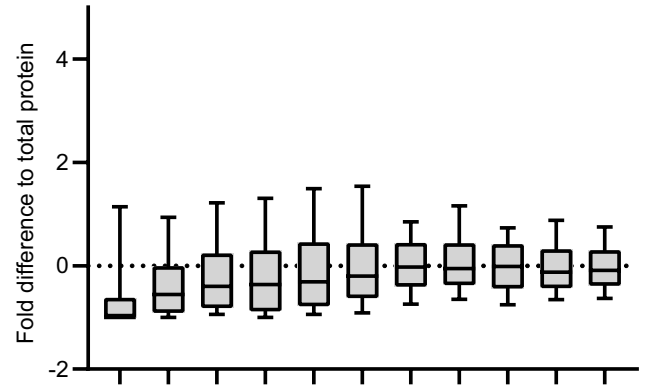

Neurofilament L

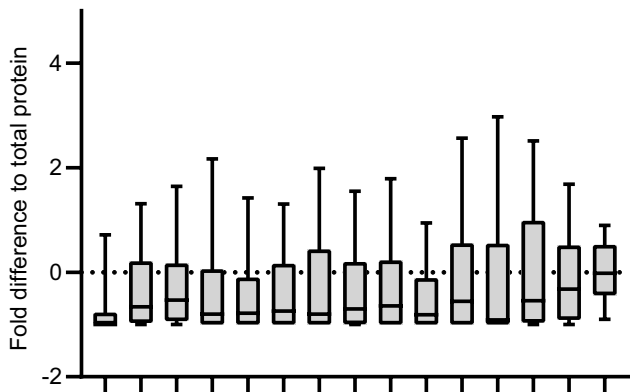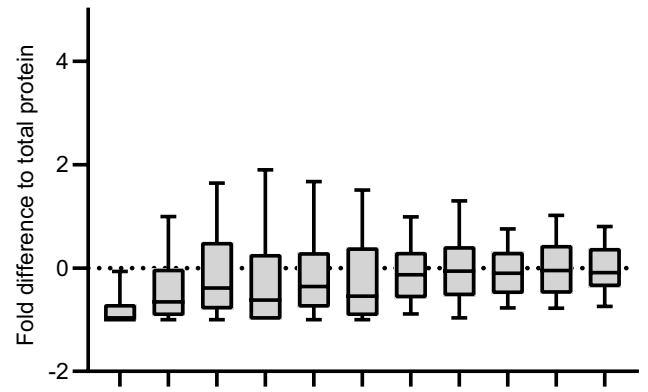

nNOS

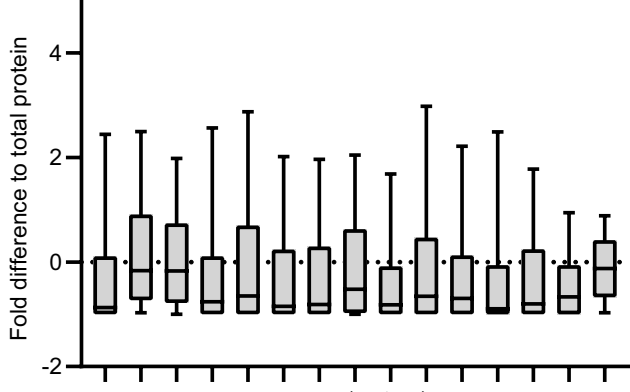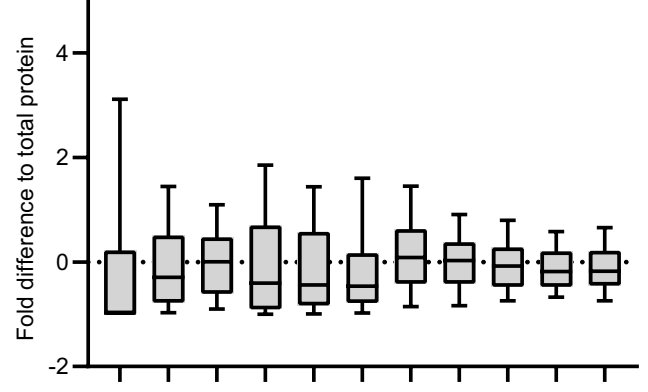

PSD Center  
PSD Central Area  
PSD Outer Area  
Lateral perisynaptic  
Upper perisynaptic  
Top perisynaptic  
Head lateral membrane  
Head lower lateral cytosol  
Head lower central cytosol  
Membrane lower head  
Neck lateral cytosol  
Neck central cytosol  
Neck bottom cytosol  
Neck lateral membrane  
Neck root cytosol  
Shaft base cytosol

PSD Center  
PSD Central Area  
PSD Outer Area  
Lateral perisynaptic  
Upper perisynaptic  
Top perisynaptic  
Head lateral membrane  
Head lower lateral cytosol  
Head lower central cytosol  
Membrane lower head  
Neck lateral cytosol  
Neck central cytosol  
Neck bottom cytosol  
Neck lateral membrane  
Neck root cytosol  
Shaft base cytosol

NSF

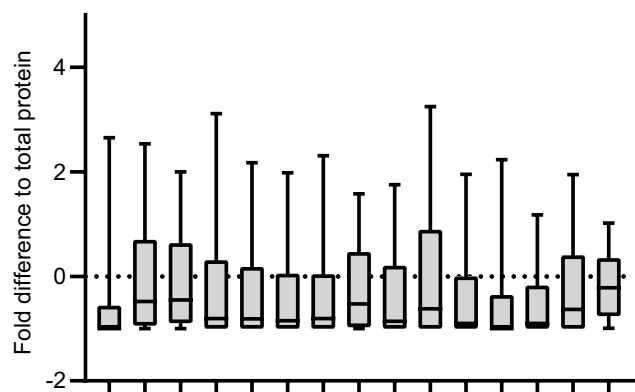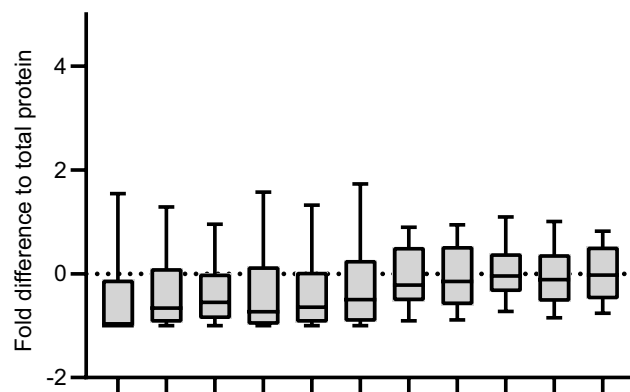

Parvalbumin

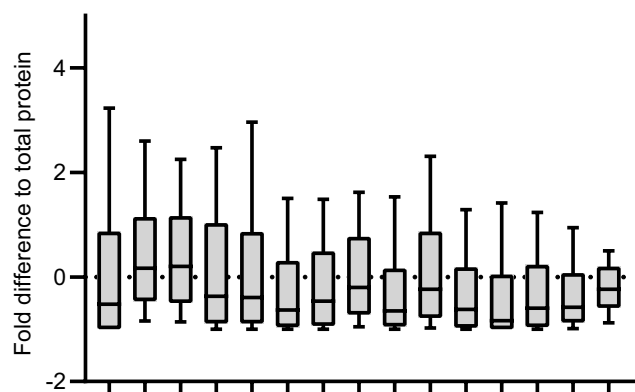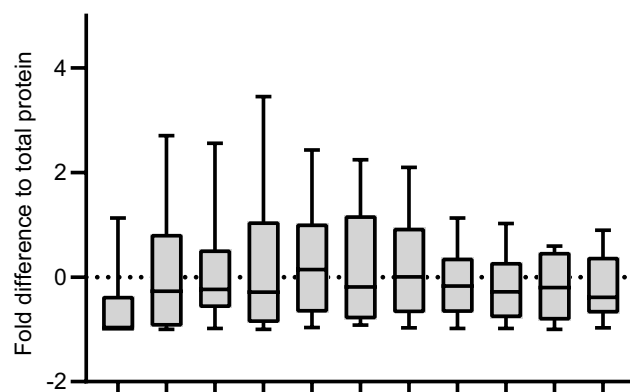

PSD93

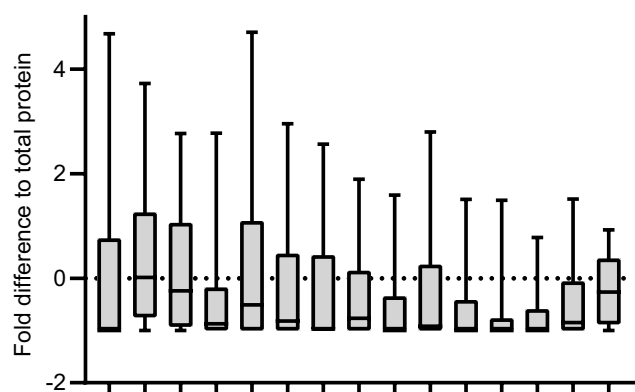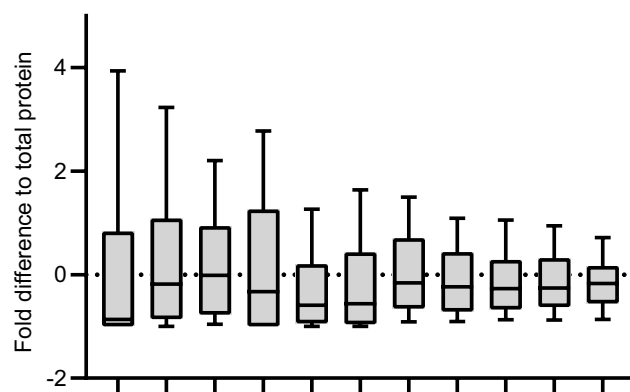

PSD95

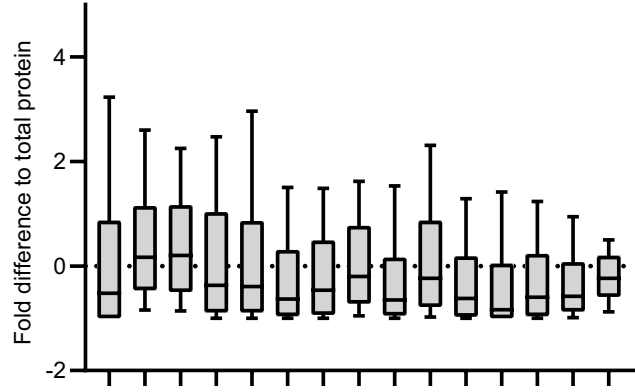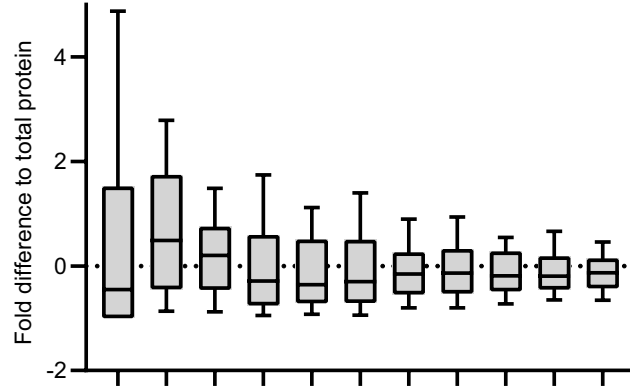

PSD Center  
PSD Central Area  
PSD Outer Area  
Lateral perisynaptic  
Upper perisynaptic  
Top perisynaptic  
Head lateral membrane  
Head lower lateral cytosol  
Head lower central cytosol  
Membrane lower head  
Neck lateral cytosol  
Neck central cytosol  
Neck bottom cytosol  
Neck root cytosol  
Neck base cytosol  
Shaft base cytosol

PSD Center  
PSD Central Area  
PSD Outer Area  
Lateral perisynaptic  
Upper perisynaptic  
Top perisynaptic  
Head lateral membrane  
Head lower lateral cytosol  
Head lower central cytosol  
Membrane lower head  
Neck lateral cytosol  
Neck central cytosol  
Neck bottom cytosol  
Neck root cytosol  
Neck base cytosol  
Shaft base cytosol



Rab3

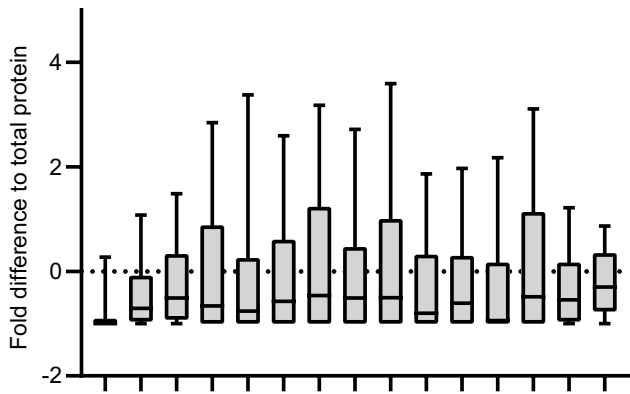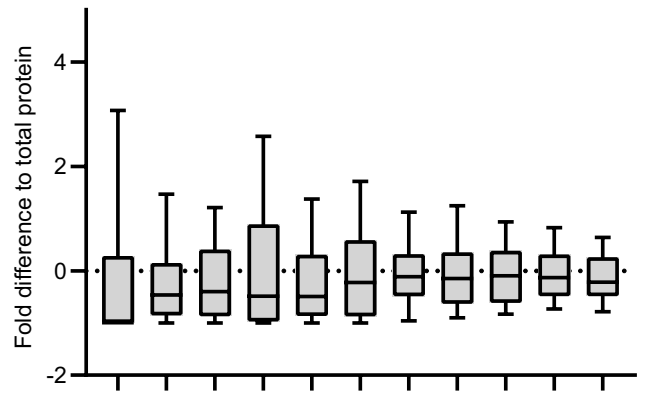

Rab4

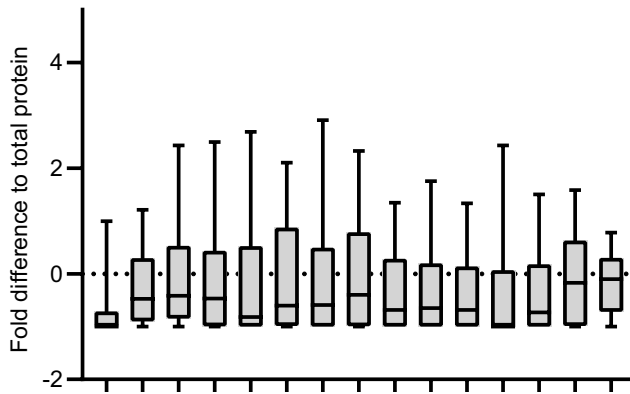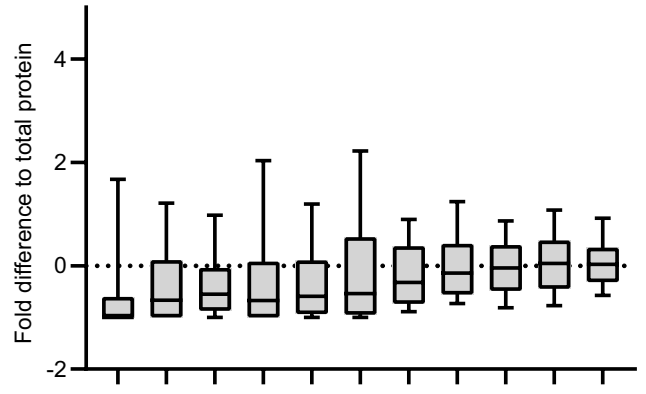

Rab5

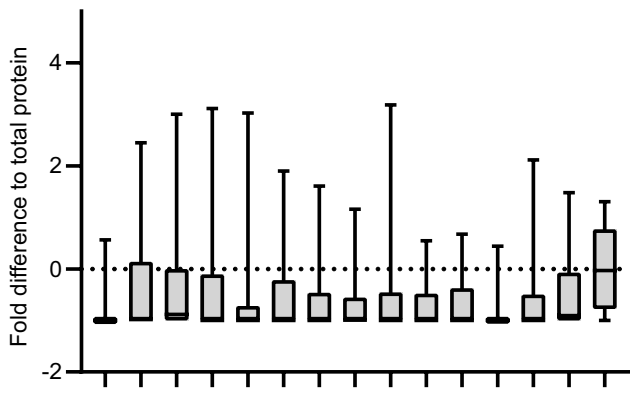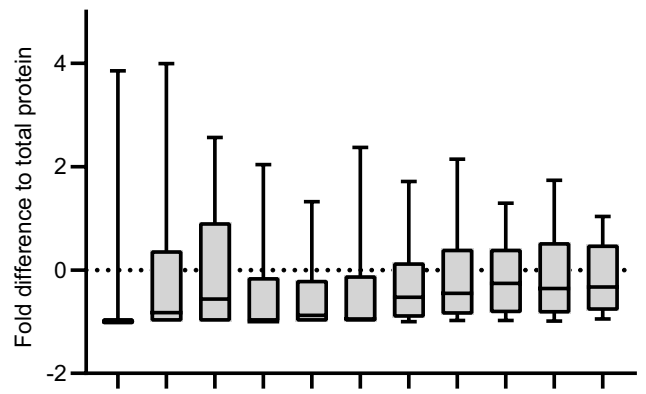

Rab7

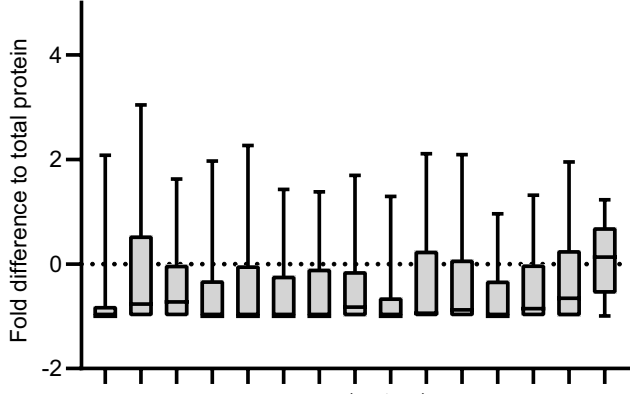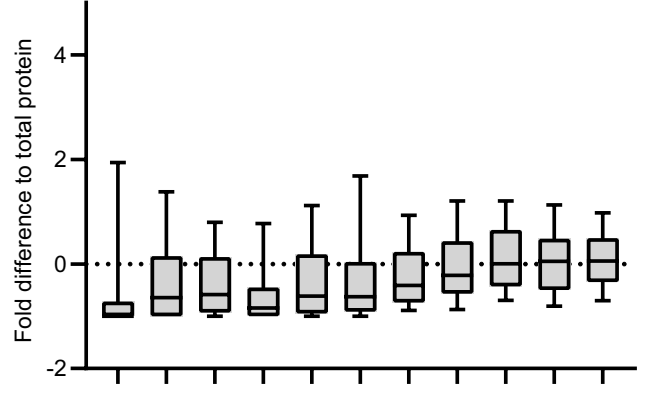

PSD Center  
PSD Central Area  
PSD Outer Area  
Lateral perisynaptic  
Upper perisynaptic  
Top lateral membrane  
Head lower lateral cytosol  
Head lower lateral cytosol  
Membrane lower head  
Lower head central cytosol  
Neck lateral cytosol  
Neck central cytosol  
Neck bottom membrane  
Neck root cytosol  
Shaft base cytosol

PSD Center  
PSD Central Area  
PSD Outer Area  
Lateral perisynaptic  
Upper perisynaptic  
Top lateral membrane  
Head lower lateral cytosol  
Head lower lateral cytosol  
Membrane lower head  
Lower head central cytosol  
Neck lateral cytosol  
Neck central cytosol  
Neck bottom membrane  
Neck root cytosol  
Shaft base cytosol

Rab9

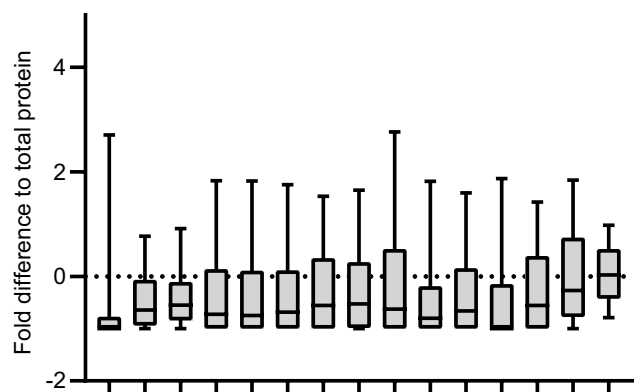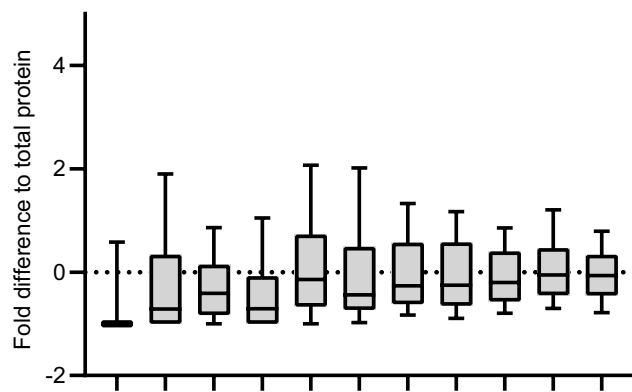

Rab11

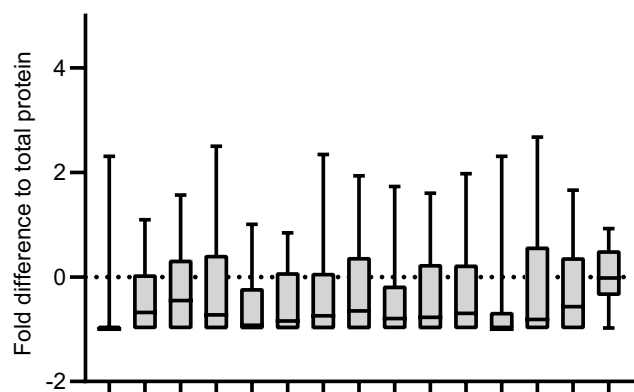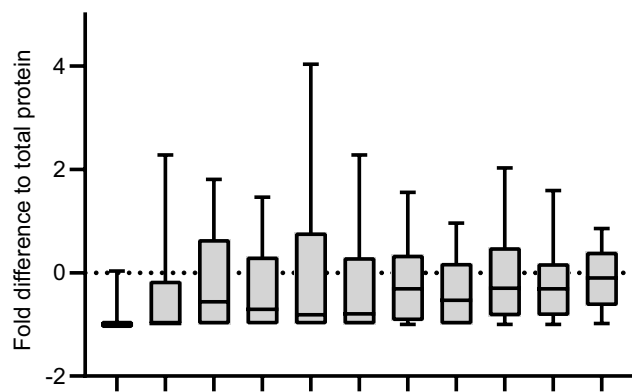

Rapsyn

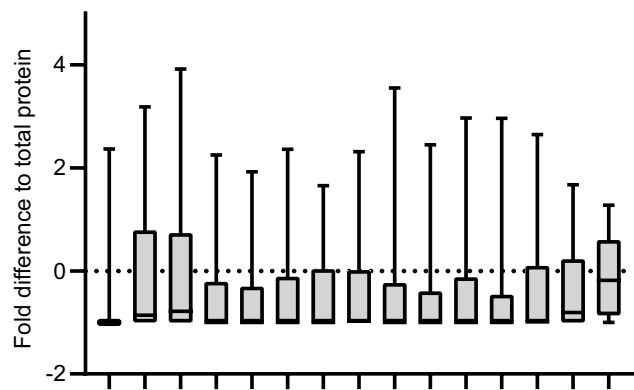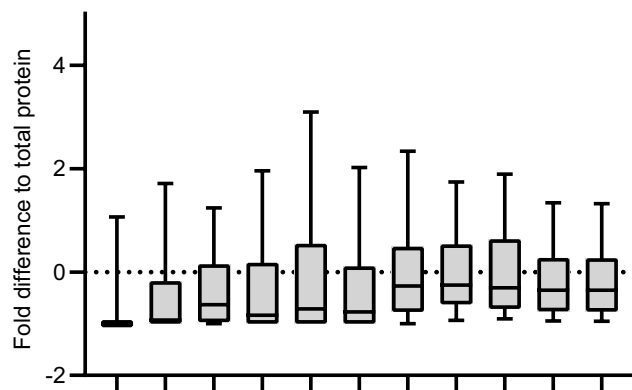

Ribosomal protein L7a

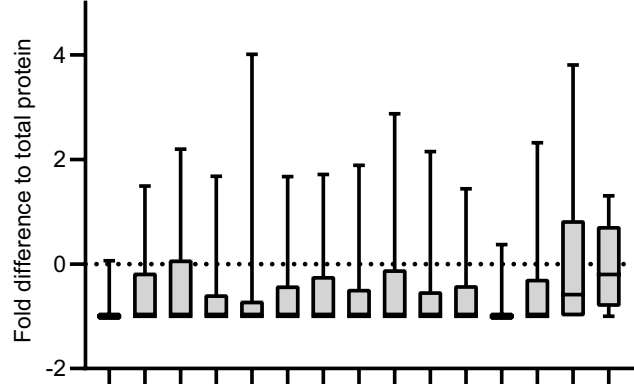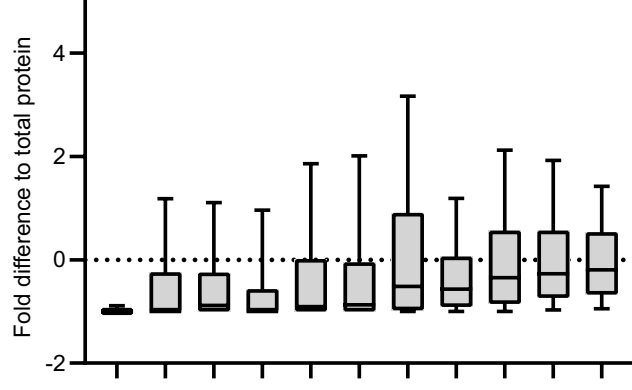

PSD Center  
PSD Central Area  
PSD Outer Area  
Lateral perisynaptic  
Upper perisynaptic  
Top lateral membrane  
Head lower lateral cytosol  
Head lower lateral cytosol  
Membrane lower cytosol  
Neck lateral cytosol  
Neck central cytosol  
Neck bottom membrane  
Neck root cytosol  
Shaft base cytosol  
Shaft base cytosol

PSD Center  
PSD Central Area  
PSD Outer Area  
Lateral perisynaptic  
Proximal perisynaptic  
Distal perisynaptic  
First ring  
Second ring  
Third ring  
Fourth ring  
Fifth ring

Ribosomal protein S3

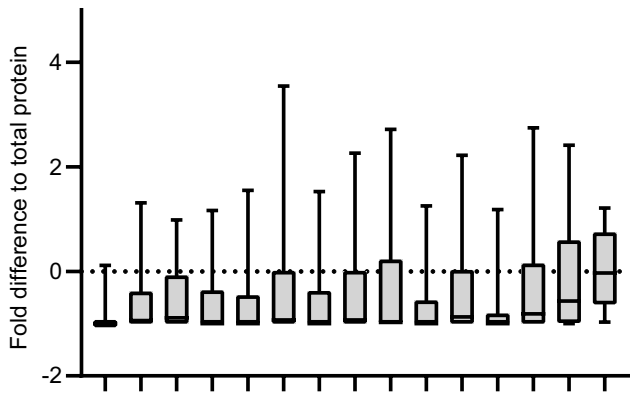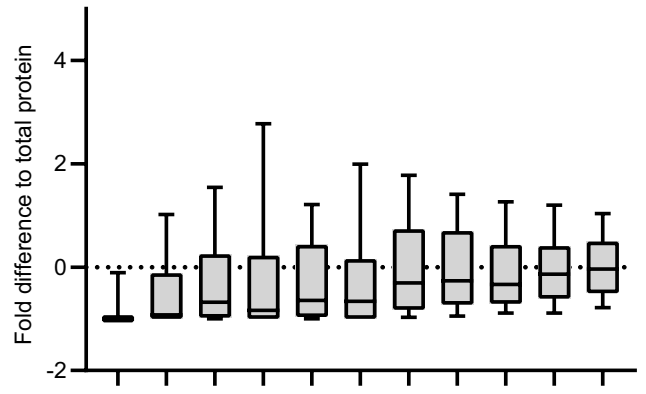

Ribosomal protein S6

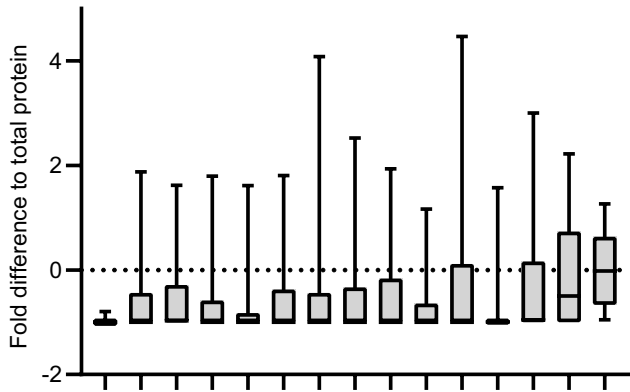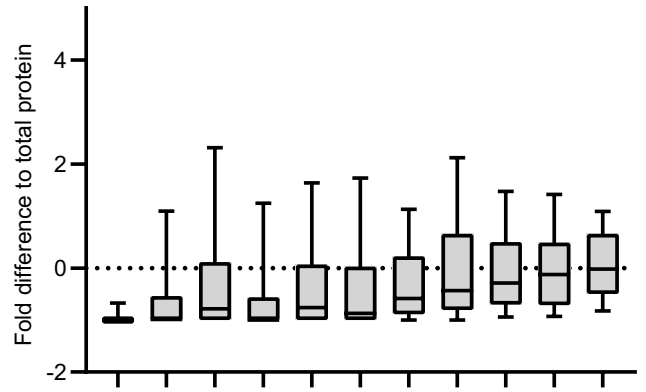

Sec22b

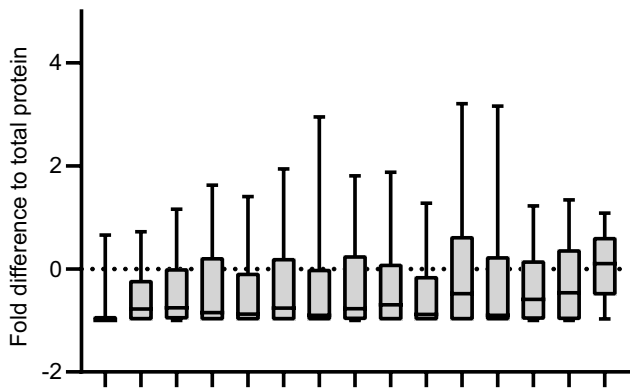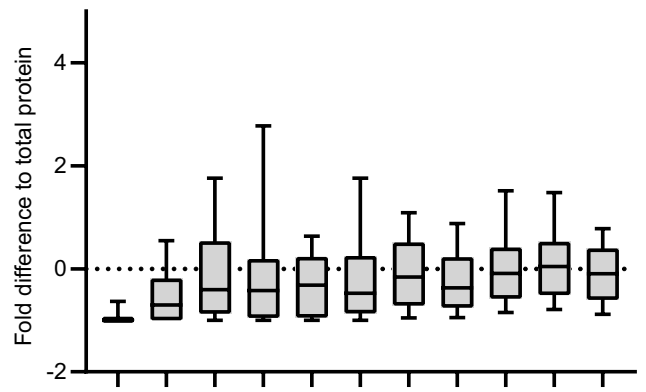

Septin7

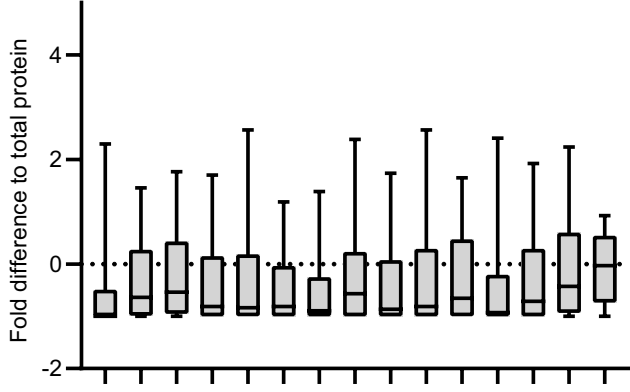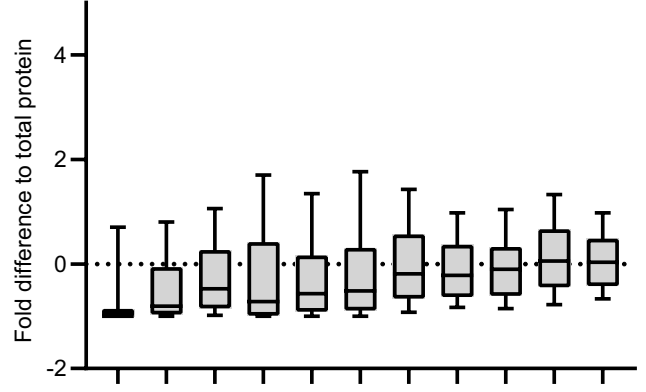

PSD Center  
PSD Central Area  
PSD Outer Area  
Lateral perisynaptic  
Upper perisynaptic  
Top perisynaptic  
Head lateral membrane  
Head lower lateral cytosol  
Membrane lower cytosol  
Neck lateral cytosol  
Neck central cytosol  
Neck bottom membrane  
Neck root cytosol  
Shaft base cytosol

PSD Center  
PSD Central Area  
PSD Outer Area  
Lateral perisynaptic  
Proximal perisynaptic  
Distal perisynaptic  
First ring  
Second ring  
Third ring  
Fourth ring  
Fifth ring



Shank1

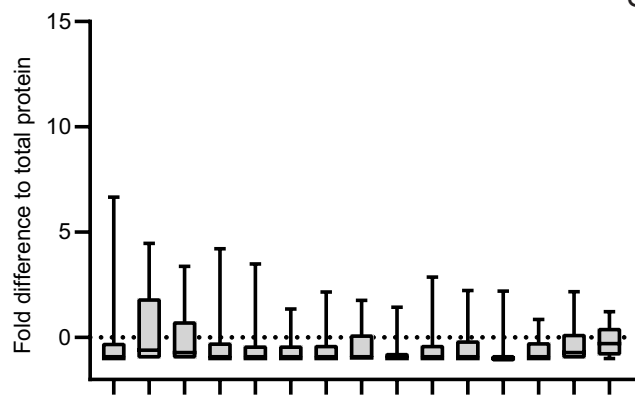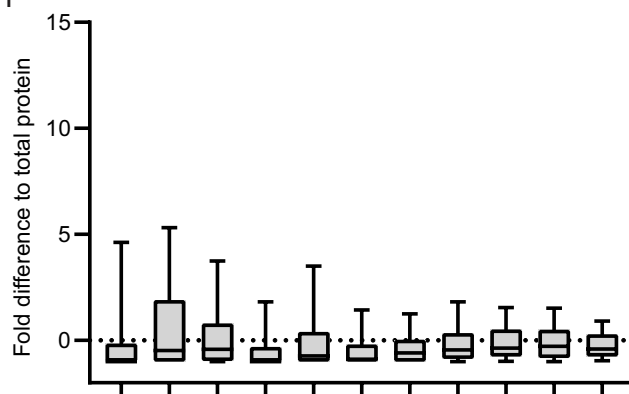

Shank2

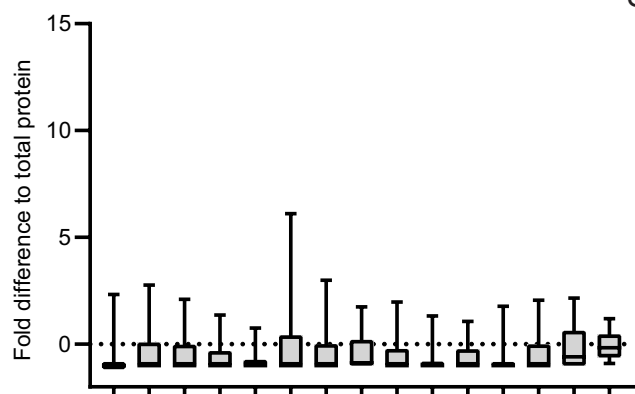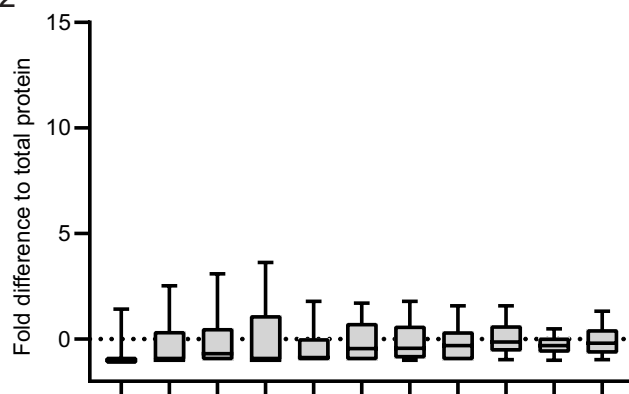

Shank3

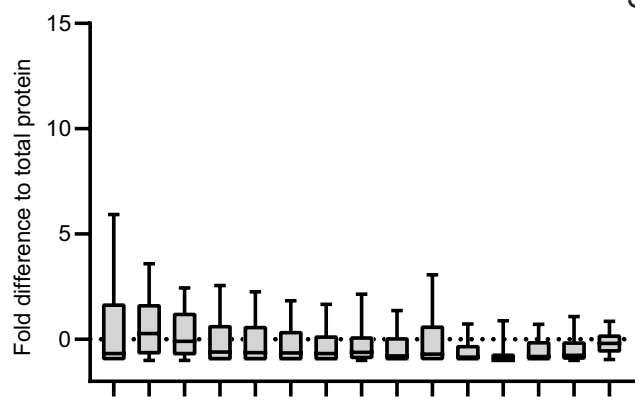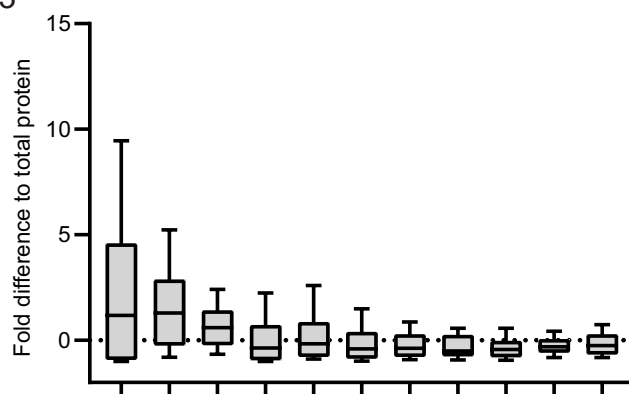

SNAP23

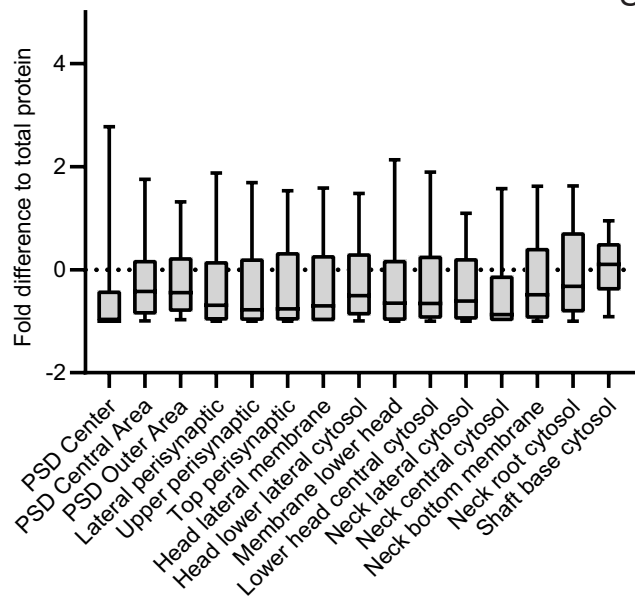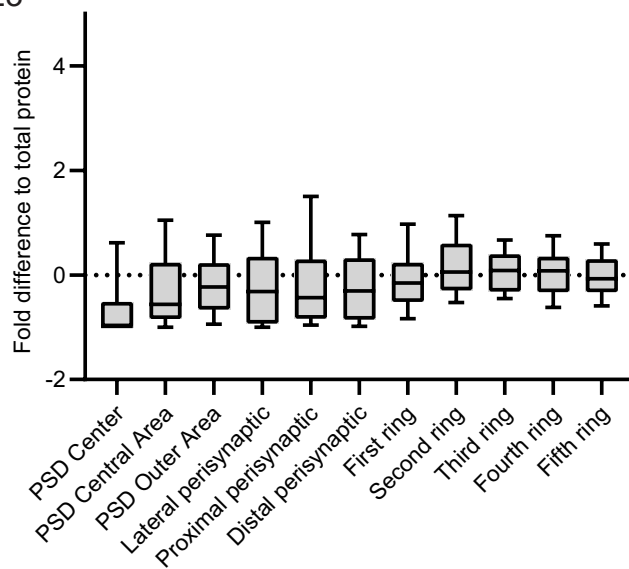

SNAP25

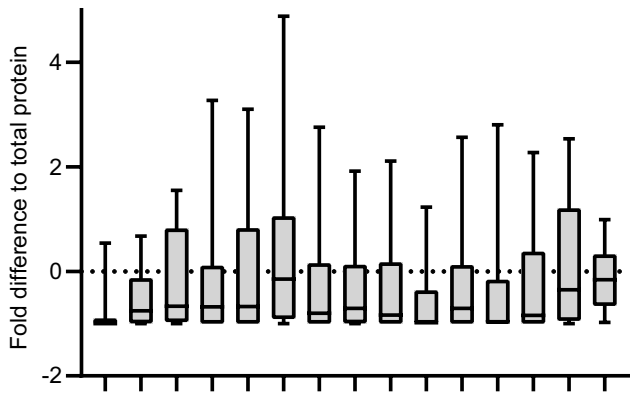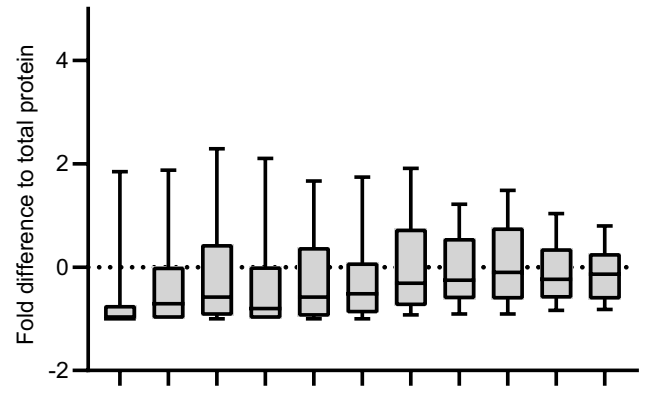

SNAP29

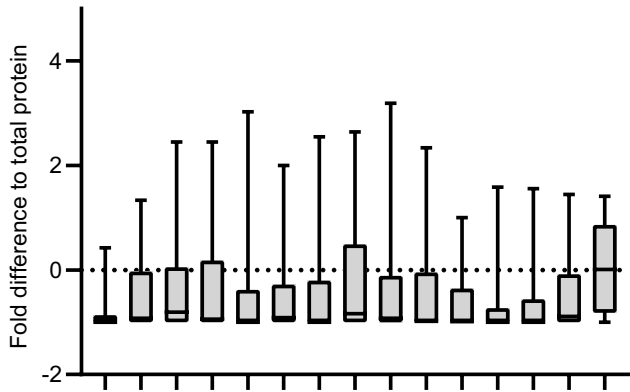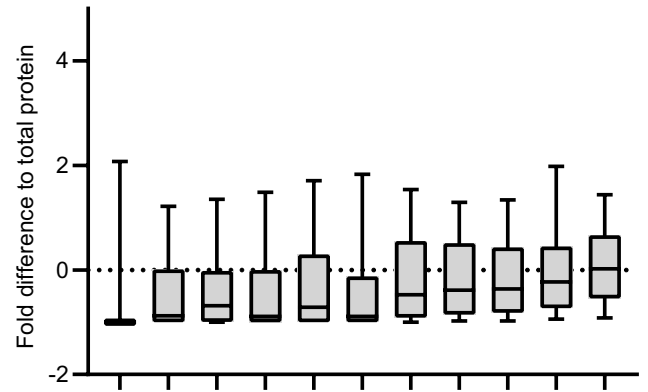

SNAP47

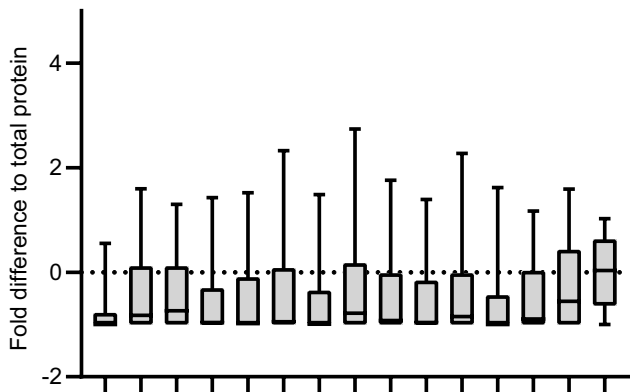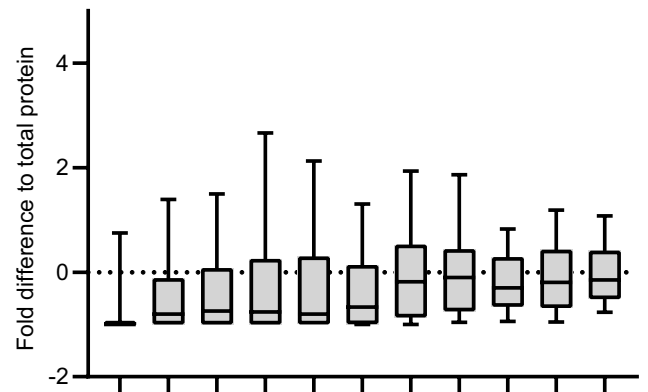

Synaptotagmin4

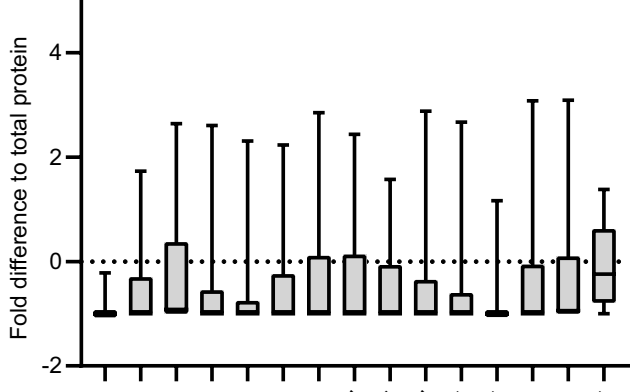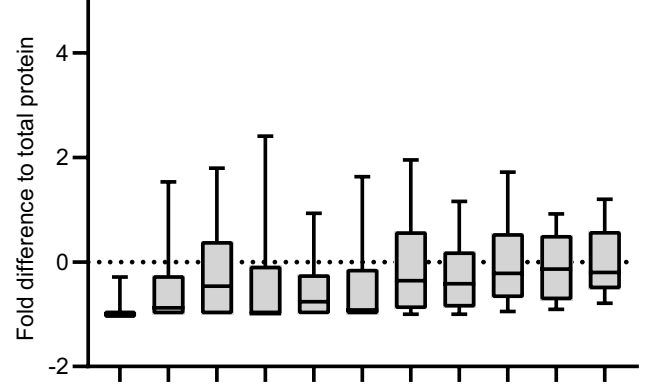

PSD Center  
 PSD Central Area  
 PSD Outer Area  
 Lateral perisynaptic  
 Upper perisynaptic  
 Top lateral membrane  
 Head lower lateral cytosol  
 Membrane lower head  
 Neck lateral cytosol  
 Lower head central cytosol  
 Neck central cytosol  
 Neck bottom membrane  
 Neck root cytosol  
 Neck base cytosol  
 Shaft base cytosol

PSD Center  
 PSD Central Area  
 PSD Outer Area  
 Lateral perisynaptic  
 Proximal perisynaptic  
 Distal perisynaptic  
 First ring  
 Second ring  
 Third ring  
 Fourth ring  
 Fifth ring

## Synaptotagmin5

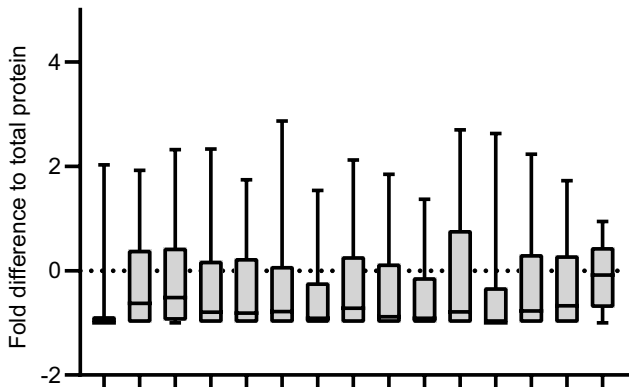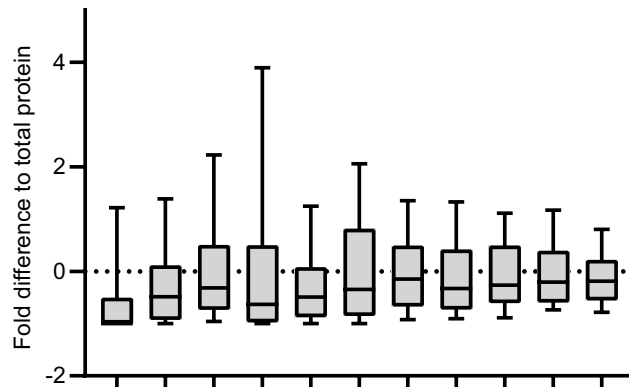

## Synaptotagmin7

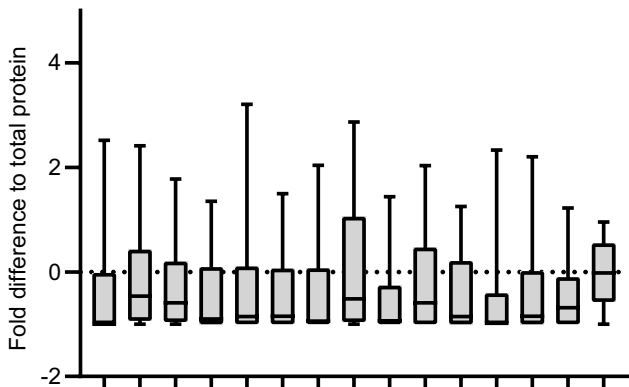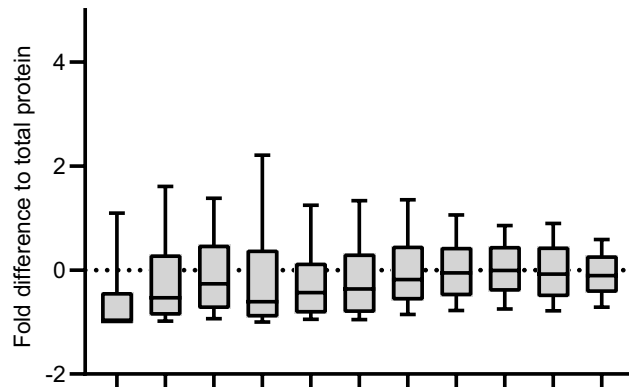

## SynGAP1

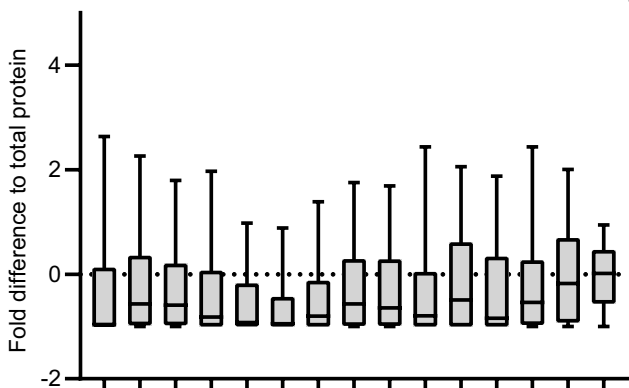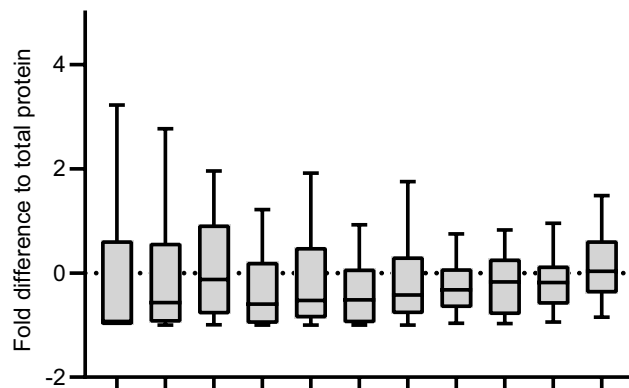

## Syntaxin1a

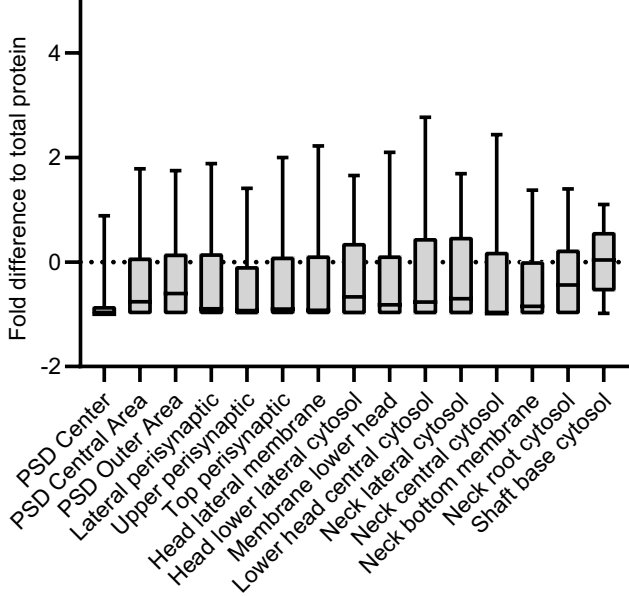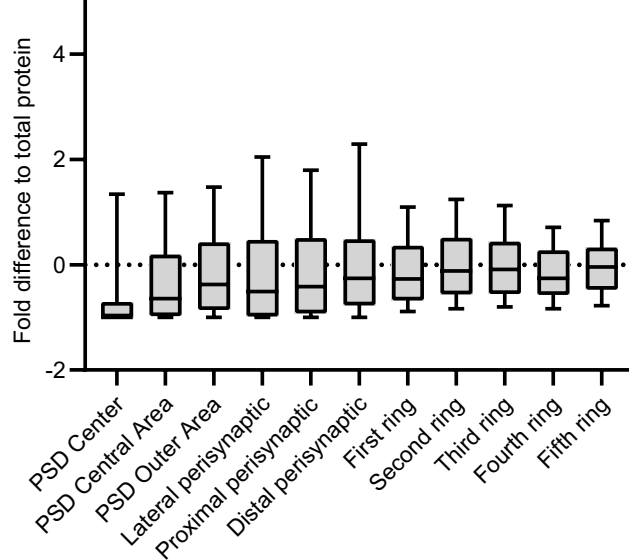



Syntaxin2

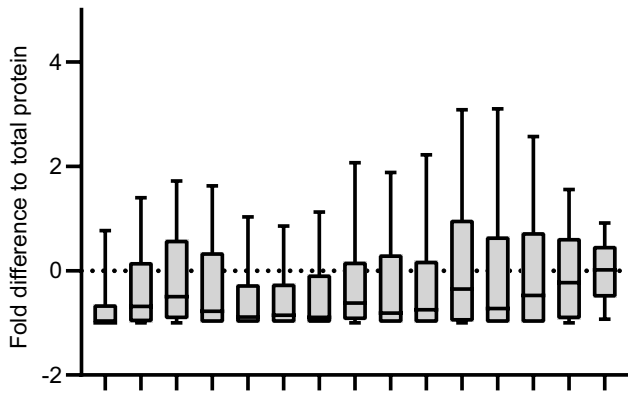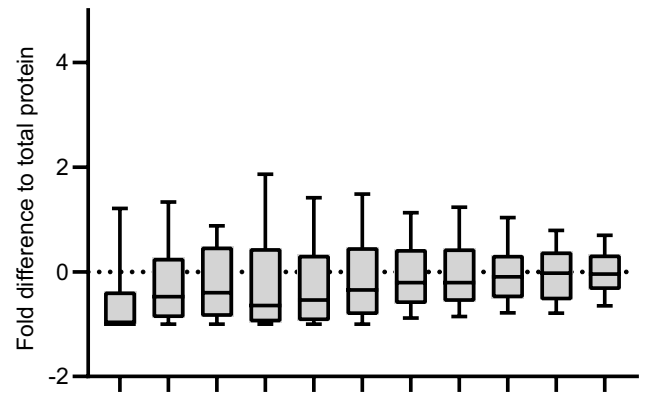

Syntaxin3

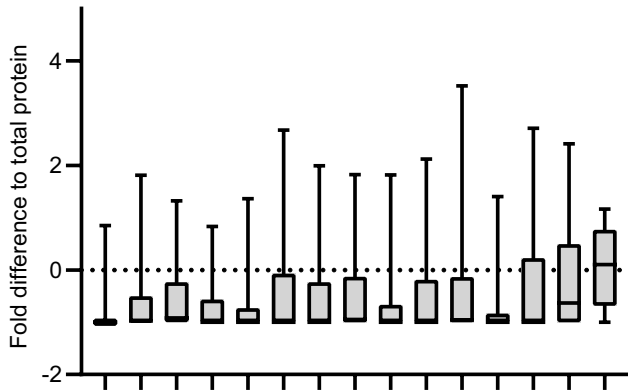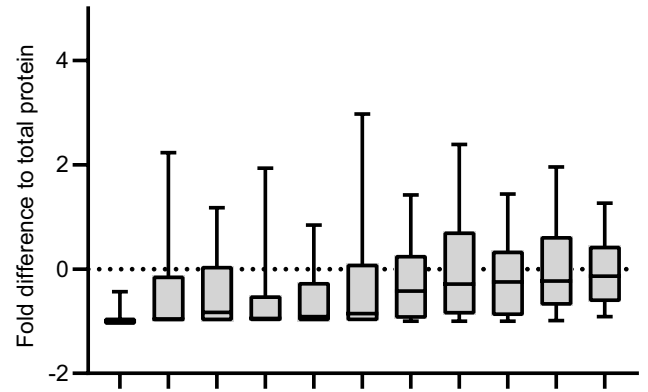

Syntaxin4

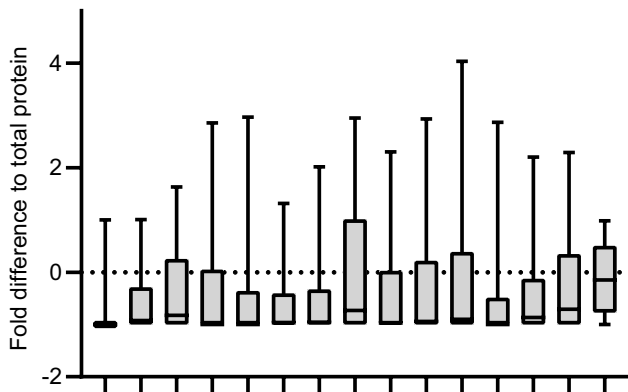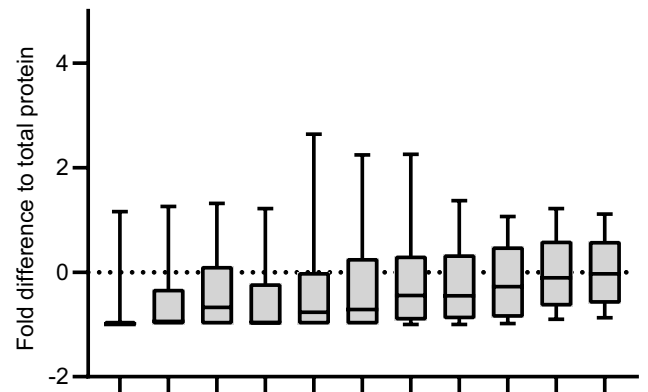

Syntaxin5

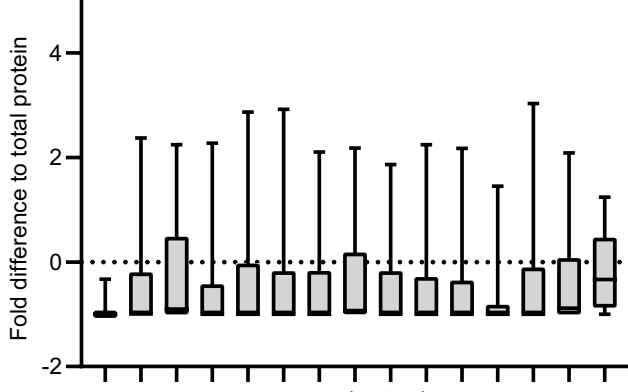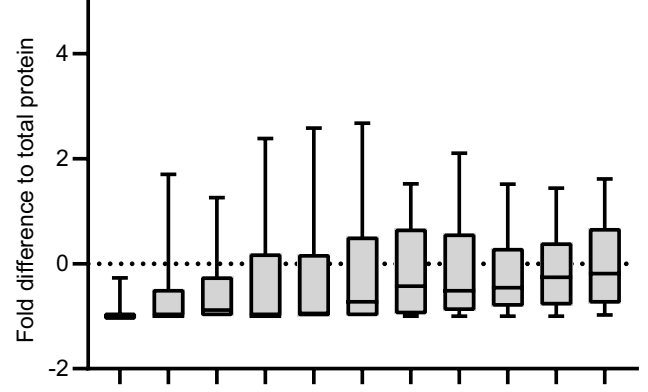

PSD Center  
 PSD Central Area  
 PSD Outer Area  
 Lateral perisynaptic  
 Upper perisynaptic  
 Top lateral membrane  
 Head lower lateral cytosol  
 Head lower lateral membrane  
 Lower head central cytosol  
 Neck lateral cytosol  
 Neck central cytosol  
 Neck bottom membrane  
 Neck root cytosol  
 Shaft base cytosol

PSD Center  
 PSD Central Area  
 PSD Outer Area  
 Lateral perisynaptic  
 Upper perisynaptic  
 Top lateral membrane  
 Head lower lateral cytosol  
 Head lower lateral membrane  
 Lower head central cytosol  
 Neck lateral cytosol  
 Neck central cytosol  
 Neck bottom membrane  
 Neck root cytosol  
 Shaft base cytosol

Syntaxin6

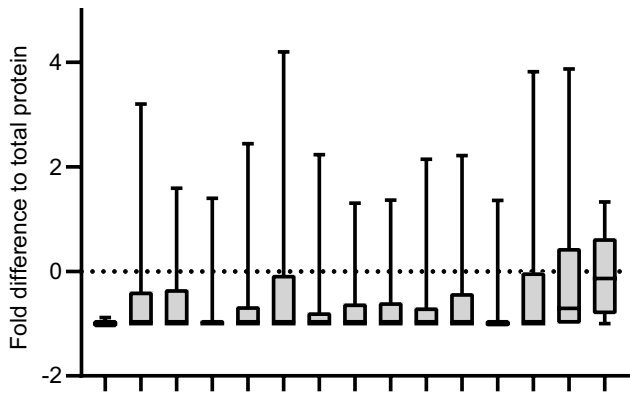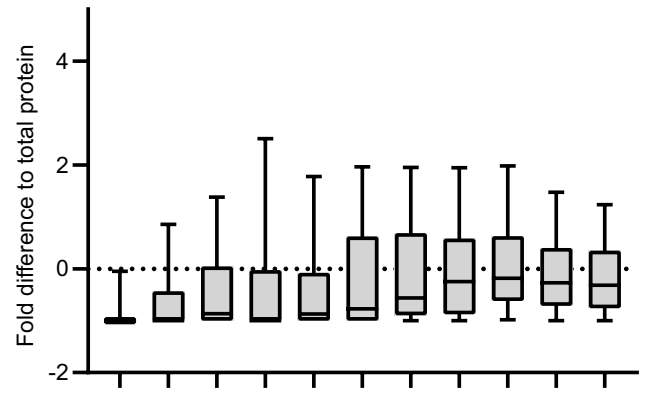

Syntaxin8

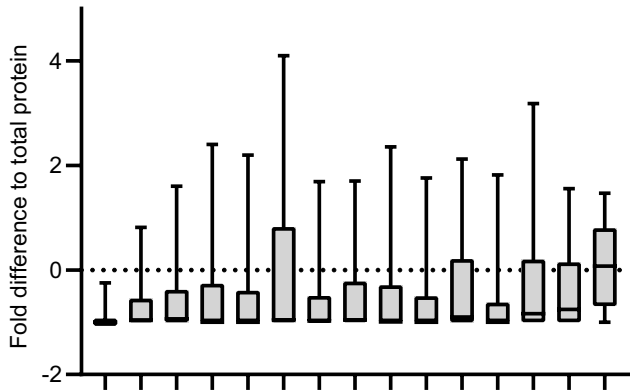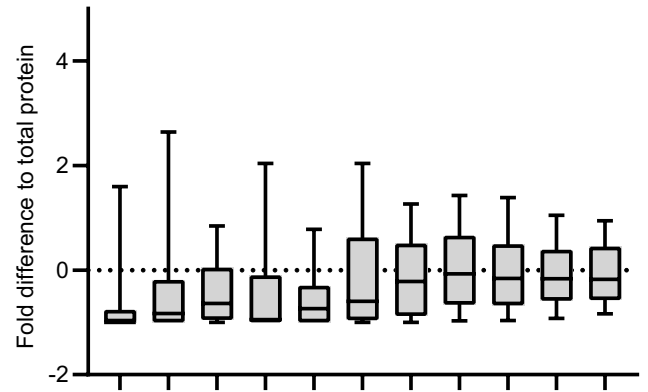

Syntaxin13

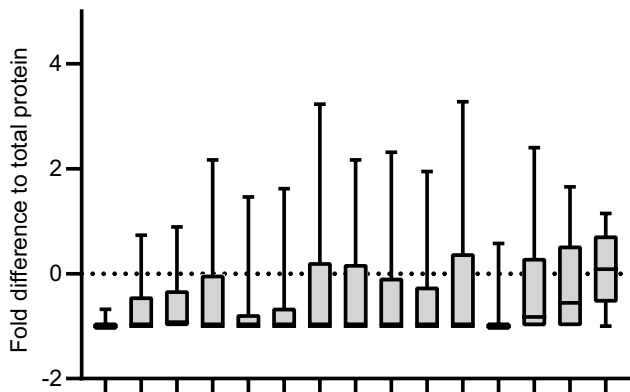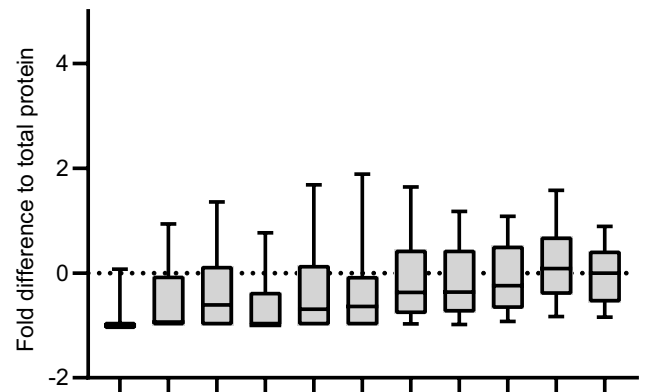

Syntaxin16

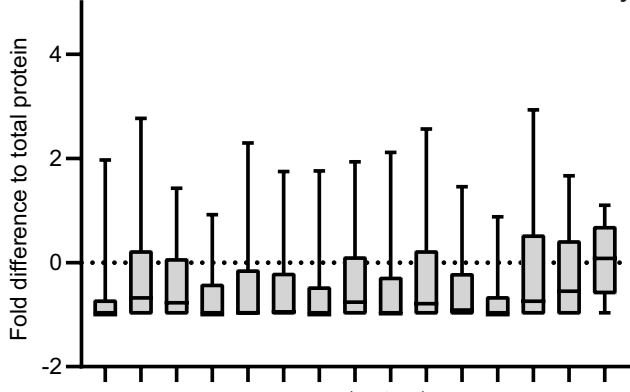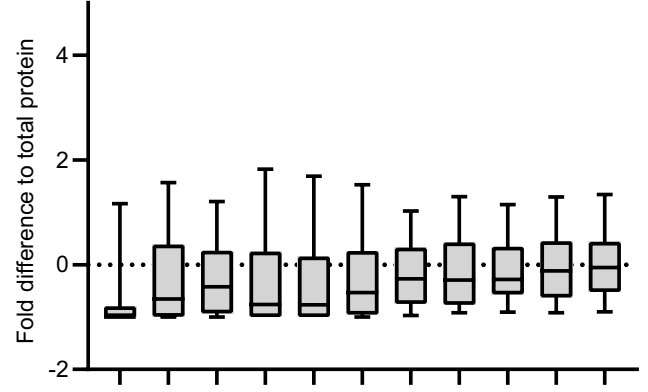

PSD Center  
PSD Central Area  
PSD Outer Area  
Lateral perisynaptic  
Upper perisynaptic  
Top perisynaptic  
Head lateral membrane  
Head lower lateral membrane  
Membrane lower head  
Neck head central cytosol  
Neck lateral cytosol  
Neck central cytosol  
Neck bottom membrane  
Neck root cytosol  
Shaft base cytosol

PSD Center  
PSD Central Area  
PSD Outer Area  
Lateral perisynaptic  
Upper perisynaptic  
Top perisynaptic  
Head lateral membrane  
Head lower lateral membrane  
Membrane lower head  
Neck head central cytosol  
Neck lateral cytosol  
Neck central cytosol  
Neck bottom membrane  
Neck root cytosol  
Shaft base cytosol

Transferrin receptor

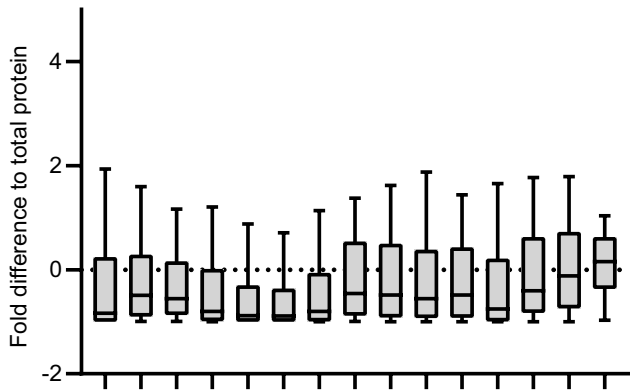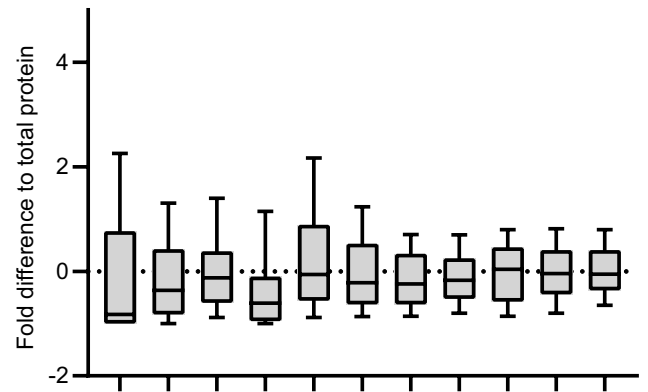

TGN38

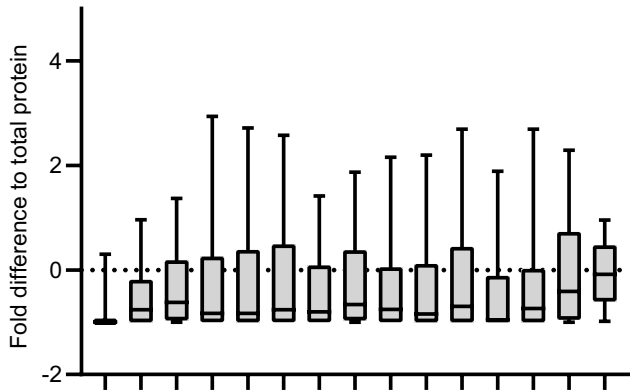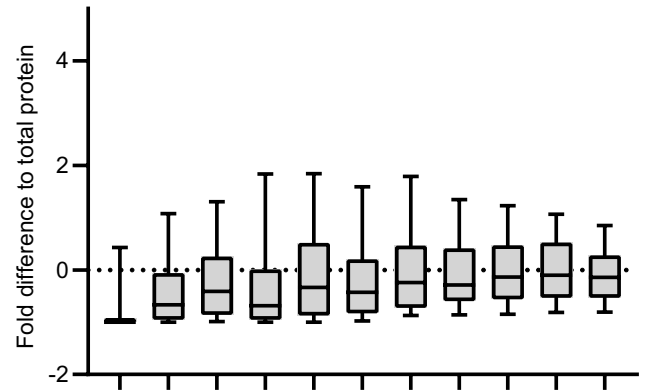

TOM20

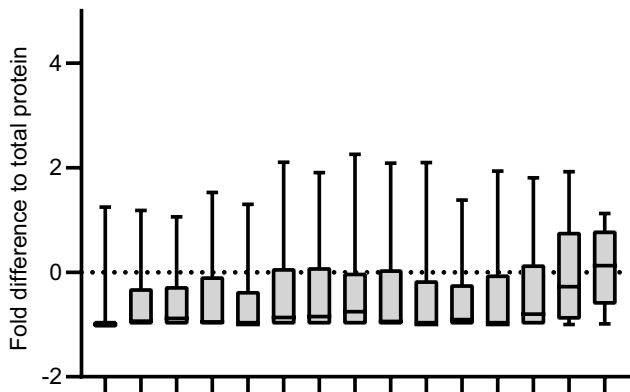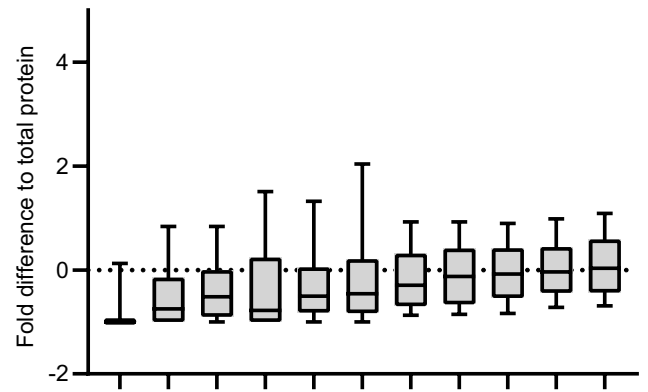

TrkB

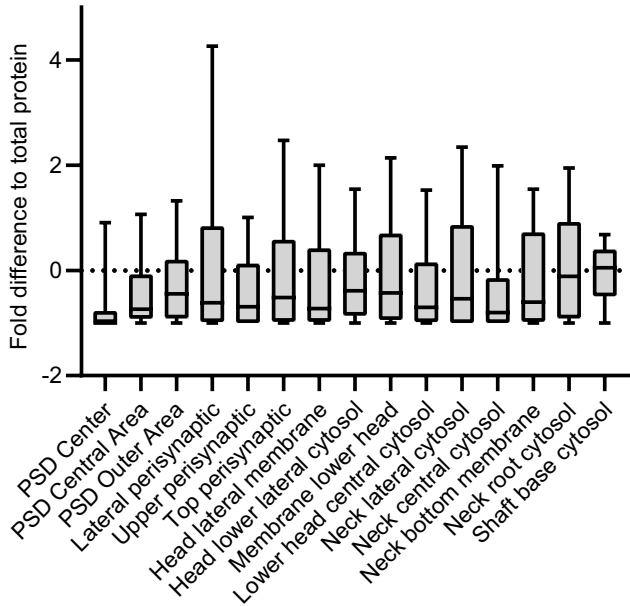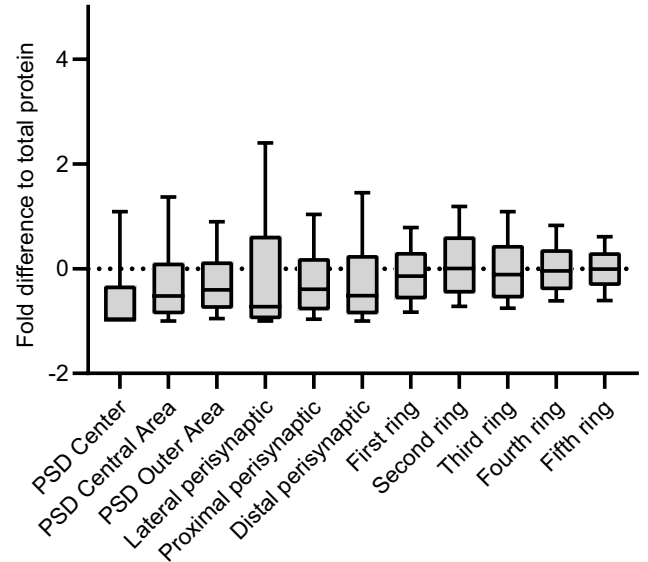



VAMP1

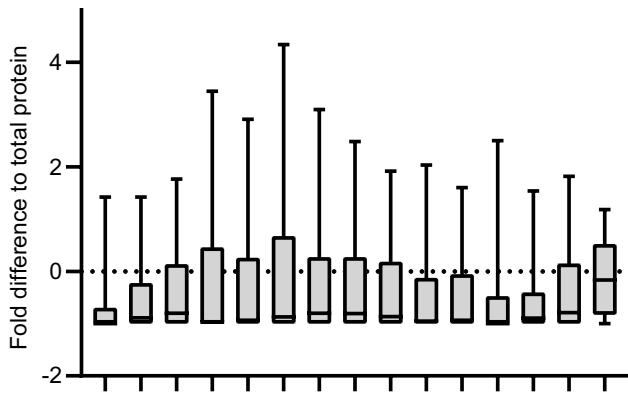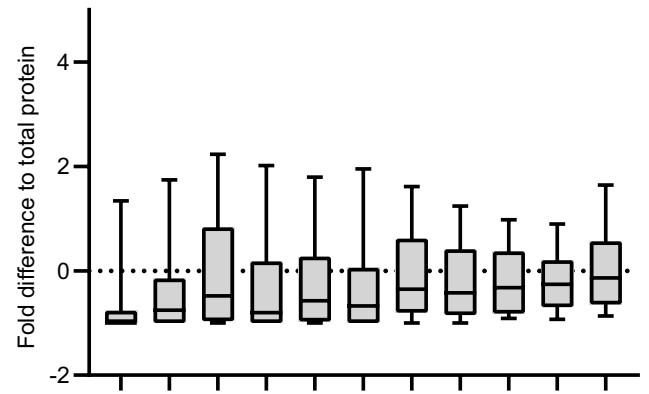

VAMP2

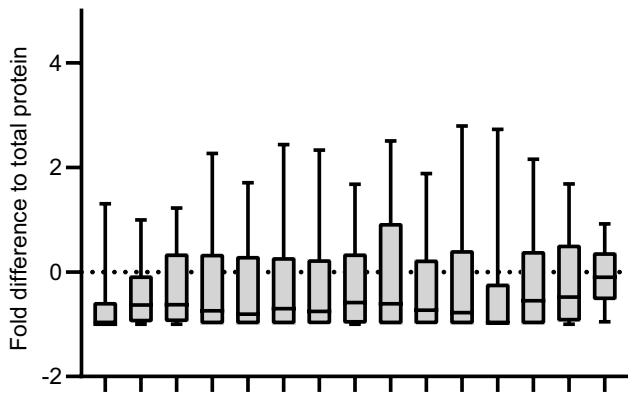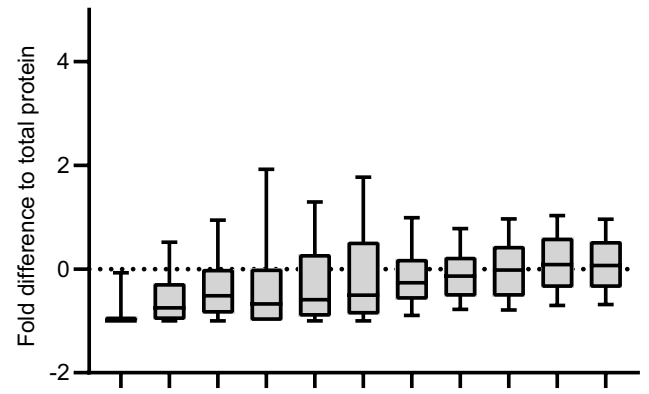

VAMP7

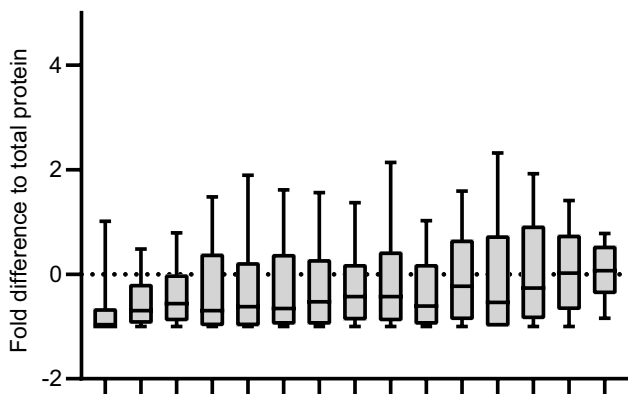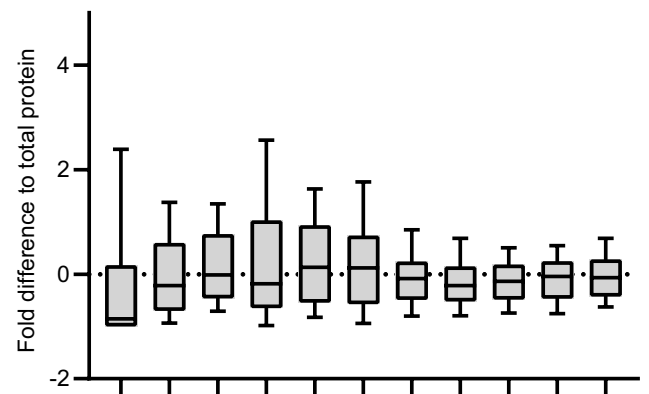

Vti1a

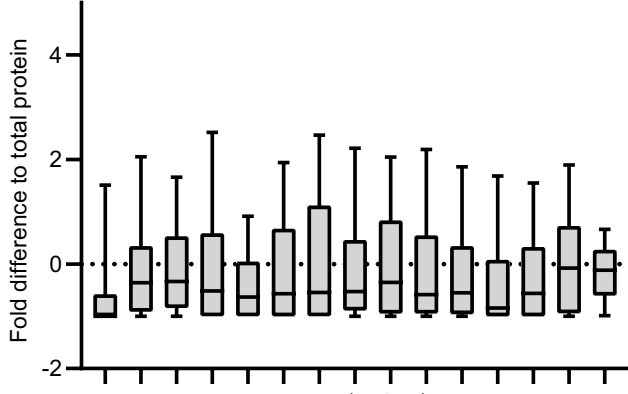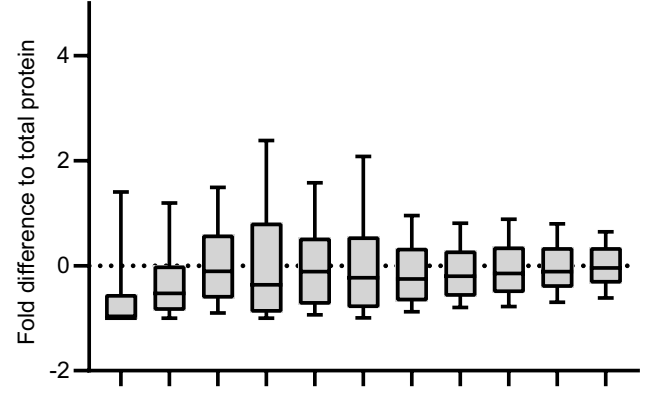

PSD Center  
 PSD Central Area  
 PSD Outer Area  
 Lateral perisynaptic  
 Upper perisynaptic  
 Top lateral membrane  
 Head lower lateral cytosol  
 Head lateral cytosol  
 Membrane lower head  
 Neck lateral cytosol  
 Neck central cytosol  
 Neck bottom membrane  
 Neck root cytosol  
 Shaft base cytosol

PSD Center  
 PSD Central Area  
 PSD Outer Area  
 Lateral perisynaptic  
 Proximal perisynaptic  
 Distal perisynaptic  
 First ring  
 Second ring  
 Third ring  
 Fourth ring  
 Fifth ring
