# Supplementary material for: A large-scale nanoscopy and biochemistry analysis of postsynaptic dendritic spines
Source: Springer Nature journal article supplement (doi:10.1038/s41593-021-00874-w), 2021-06-24
Supplement: MOESM3 [file 41593_2021_874_MOESM3_ESM.xlsx]

## Sheet: Primary antibodies
Primary antibodies
Target protein	Species	Dilution	Manufacturer	Cat. No.	Validation
ADAM22	mouse	500	Novus Biologicals	NBP2-22425	Richter, K. N. et al. Comparative synaptosome imaging: a semi-quantitative method to obtain copy numbers for synaptic and neuronal proteins. Sci. Rep. 8, 14838 (2018).
Akt (pan)	rabbit	400	Cell Signaling	4691	Sourbier, C. et al. Englerin A Stimulates PKCθ to Inhibit Insulin Signaling and to Simultaneously Activate HSF1: Pharmacologically Induced Synthetic Lethality. Cancer Cell 23, 228–237 (2013).
α/β-SNAP	mouse	100	Jahn Laboratory	77.2	Wilhelm, B. G. et al. Composition of isolated synaptic boutons reveals the amounts of vesicle trafficking proteins. Science 344, 1023–8 (2014).
α-internexin	rabbit	500	LSBio	LS-B10413	Clear observation of internexin filaments, as expected from the literature. Low signal outside of filaments. Shown in Supplementary Data File 1.
AP180	rabbit	100	Synaptic Systems	155 003	K.O. validated
Ankyrin-G	mouse	500	Neuromab	AB_10673030, clone N106/36	Galiano, M. R., Jha, S., Ho, T. S., Zhang, C., Ogawa, Y., Chang, K., Stankewich, M. C., Mohler, P. J., and Rasband, M. N. A distal axonal cytoskeleton forms an intra-axonal boundary that controls axon initial segment assembly. Cell 149, 1125-1139 (2012).
APP	mouse	100	Millipore	MAB-348	Wilhelm, B. G. et al. Composition of isolated synaptic boutons reveals the amounts of vesicle trafficking proteins. Science 344, 1023–8 (2014).
Arc	rabbit	1000	Synaptic Systems	156 003	K.O. validated
β-2-spectrin	mouse	100	BDBiosciences	612562	Richter, K. N. et al. Glyoxal as an alternative fixative to formaldehyde in immunostaining and super‐resolution microscopy. EMBO J. e201695709 (2017) doi:10.15252/embj.201695709.
β-tubulin	llama	100	Self-made	See 38	Mikhaylova, M. et al. Resolving bundled microtubules using anti-tubulin nanobodies. Nat. Commun. 6, (2015).
β-3-Tubulin	rabbit	500	Cell Signaling	5568	Lim, M. L. et al. Characterization of stem-like cells in mucoepidermoid tracheal paediatric tumor. PLoS One 9, 1–12 (2014).
BDNF	rabbit	100	Biorbyt	orb38809	Manufacturer, available at antibodypedia.com
Calbindin-D28K	rabbit	500	Synaptic Systems	214 002	Control Antigen
Calcineurin A	rabbit	1000	Synaptic Systems	387 002	Control Antigen
Calmodulin	rabbit	100	Abcam	ab45689	Wilhelm, B. G. et al. Composition of isolated synaptic boutons reveals the amounts of vesicle trafficking proteins. Science 344, 1023–8 (2014).
Calreticulin	rabbit	200	Cell Signaling	12238	Richter, K. N. et al. Glyoxal as an alternative fixative to formaldehyde in immunostaining and super‐resolution microscopy. EMBO J. e201695709 (2017) doi:10.15252/embj.201695709.
Calretinin	rabbit	250	Novus Biologicals	NBP1-88220	K.D. validated
CaMKII (alpha subunit, phosphorylated form)	mouse	500	Abnova	MAB6627	Makhinson, M., Chotiner, J. K., Watson, J. B. & O’Dell, T. J. Adenylyl cyclase activation modulates activity-dependent changes in synaptic strength and Ca2+/calmodulin-dependent kinase II autophosphorylation. J. Neurosci. 19, 2500–2510 (1999).
CAPS1	rabbit	500	Abcam	ab69797	Wilhelm, B. G. et al. Composition of isolated synaptic boutons reveals the amounts of vesicle trafficking proteins. Science 344, 1023–8 (2014).
Cav1.3	rabbit	50	Alomone Labs	ACC-311	Control Antigen
Cav2.1	rabbit	500	Synaptic Systems	152 203	K.O. validated
CDC42	rabbit	100	Thermo Scientific	PA1-092	K.D. validated in Chiang, C. F., Flint, M., Lin, J. M. S. & Spiropoulou, C. F. Endocytic pathways used by andes virus to enter primary human lung endothelial cells. PLoS One 11, 1–19 (2016).
Chromogranin A	rabbit	500	Synaptic Systems	259 003	K.O. validated
Chromogranin B	rabbit	500	Synaptic Systems	259 103	K.O. validated
Chromogranin C	rabbit	250	Abcam	ab12241	Hofsli, E., Wheeler, T. E., Langaas, M., Lægreid, A. & Thommesen, L. Identification of novel neuroendocrine-specific tumour genes. Br. J. Cancer 99, 1330–1339 (2008).
Clathrin heavy chain	mouse	100	BD Biosciences	610499	Wilhelm, B. G. et al. Composition of isolated synaptic boutons reveals the amounts of vesicle trafficking proteins. Science 344, 1023–8 (2014).
Clathrin light chain	mouse	1000	Synaptic Systems	113 011	Wilhelm, B. G. et al. Composition of isolated synaptic boutons reveals the amounts of vesicle trafficking proteins. Science 344, 1023–8 (2014).
Cortactin	mouse	500	Synaptic Systems	313 111	Lai, F. P. L. et al. Cortactin promotes migration and platelet-derived growth factor-induced actin reorganization by signaling to Rho-GTPases. Mol. Biol. Cell 20, 3209–23 (2009).
DLGAP1	rabbit	50	Novus Biologicals	NBP1-76911	Richter, K. N. et al. Comparative synaptosome imaging: a semi-quantitative method to obtain copy numbers for synaptic and neuronal proteins. Sci. Rep. 8, 14838 (2018).
Dopamine receptor 1	rabbit	1000	Abcam	ab40653	Control antigen
Dopamine receptor 2	rabbit	500	Merck	AB5084P	K.O. validated in Stojanovic, T. et al. Validation of dopamine receptor DRD1 and DRD2 antibodies using receptor deficient mice. Amino Acids 49, 1101–1109 (2017).
Drebrin1	mouse	100	Novus Biologicals	NB100-1951	Imamura, K., Shirao, T., Mori, K. & Obata, K. Changes of drebrin expression in the visual cortex of the cat during development. Neurosci. Res. 13, 33–41 (1992).
Dynamin 1/2/3	mouse	100	BDBiosciences	610245	Wilhelm, B. G. et al. Composition of isolated synaptic boutons reveals the amounts of vesicle trafficking proteins. Science 344, 1023–8 (2014).
ERp72	rabbit	100	Cell Signaling	5033	Richter, K. N. et al. Comparative synaptosome imaging: a semi-quantitative method to obtain copy numbers for synaptic and neuronal proteins. Sci. Rep. 8, 14838 (2018).
GAD65	mouse	500	Synaptic Systems	198 111	Control antigen
GFAP	mouse	500	Synaptic Systems	173 011	Control antigen
GluK1	rabbit	100	Alomone	AGC-008	Control antigen
GluN1	mouse	1000	Synaptic Systems	114 011	Wang, S. S. H. et al. Fusion Competent Synaptic Vesicles Persist upon Active Zone Disruption and Loss of Vesicle Docking. Neuron 91, 777–791 (2016).
GluN2A	mouse	100	NeuroMab	75-288	Richter, K. N. et al. Comparative synaptosome imaging: a semi-quantitative method to obtain copy numbers for synaptic and neuronal proteins. Sci. Rep. 8, 14838 (2018).
GluN2B	mouse	100	NeuroMab	75-101	Richter, K. N. et al. Comparative synaptosome imaging: a semi-quantitative method to obtain copy numbers for synaptic and neuronal proteins. Sci. Rep. 8, 14838 (2018).
GluR1	rabbit	500	Synaptic Systems	182 003	K.O. validated
GluR2	rabbit	100	Alomone Labs	AGC-005	Control antigen
GluR3	mouse	100	Invitrogen	32-0400	Richter, K. N. et al. Comparative synaptosome imaging: a semi-quantitative method to obtain copy numbers for synaptic and neuronal proteins. Sci. Rep. 8, 14838 (2018).
GRIP1/2	rabbit	100	Synaptic Systems	151 003	Control antigen
Homer1	mouse	500	Synaptic Systems	160 011	Control antigen
Homer1	rabbit	500	Synaptic Systems	160 003	Control antigen
Homer2	rabbit	500	Synaptic Systems	160 203	Tao-Cheng, J. H., Thein, S., Yang, Y., Reese, T. S. & Gallant, P. E. Homer is concentrated at the postsynaptic density and does not redistribute after acute synaptic stimulation. Neuroscience 266, 80–90 (2014).
Homer3	rabbit	250	Synaptic Systems	160 303	Control antigen
HSC70	mouse	100	Santa Cruz	sc-7298	Control antigen
Iba1	guinea pig	500	Synaptic Systems	234 004	Control antigen
IGF-1 Receptor	rabbit	300	Cell Signaling	3027	Richter, K. N. et al. Comparative synaptosome imaging: a semi-quantitative method to obtain copy numbers for synaptic and neuronal proteins. Sci. Rep. 8, 14838 (2018); Gazit, N. et al. IGF-1 Receptor Differentially Regulates Spontaneous and Evoked Transmission via Mitochondria at Hippocampal Synapses. Neuron 89, 1–15 (2016).
KCNJ2	rabbit	100	Novus Biologicals	NBP1-95482	Richter, K. N. et al. Comparative synaptosome imaging: a semi-quantitative method to obtain copy numbers for synaptic and neuronal proteins. Sci. Rep. 8, 14838 (2018).
Kv1.1	rabbit	100	Thermo Scientific	PA5-19593	Richter, K. N. et al. Comparative synaptosome imaging: a semi-quantitative method to obtain copy numbers for synaptic and neuronal proteins. Sci. Rep. 8, 14838 (2018).
Kv2.1	rabbit	500	Synaptic Systems	231 002	Control antigen
LNGFR	rabbit	1000	Cell Signaling	8238	Yi, T. G. et al. A novel immunomodulatory mechanism dependent on acetylcholine secreted by human bone marrow-derived mesenchymal stem cells. Int. J. Stem Cells 12, 315–330 (2019).
m-AChR-1	rabbit	100	Novus Biologicals	NBP1-87466	Molina, J. et al. Control of insulin secretion by cholinergic signaling in the human pancreatic islet. Diabetes 63, 2714–2726 (2014).
MAP2	rabbit	1000	Synaptic Systems	188 002	Control antigen
mGluR1α	rabbit	250	Abcam	ab51314	Gruol, D. L. et al. Neuroadaptive changes in cerebellar neurons induced by chronic exposure to IL-6. J. Neuroimmunol. 239, 28–36 (2011).
mGluR2	rabbit	100	Abcam	ab150387	Rogers, E. J. et al. An IQSEC2 mutation associated with intellectual disability and autism results in decreased surface AMPA receptors. Front. Mol. Neurosci. 12, 1–18 (2019).
mGluR5	rabbit	100	Abcam	ab76316	Notartomaso, S. et al. mGlu1 Receptors Monopolize the Synaptic Control of Cerebellar Purkinje Cells by Epigenetically Down-Regulating mGlu5 Receptors. Sci. Rep. 8, 1–11 (2018).
myosin5a	rabbit	200	Sigma-Aldrich	M5062	Richter, K. N. et al. Comparative synaptosome imaging: a semi-quantitative method to obtain copy numbers for synaptic and neuronal proteins. Sci. Rep. 8, 14838 (2018).
Na β 1	rabbit	50	Alomone Labs	ASC-041	Control antigen
Na+/K+ ATPase	mouse	1000	Thermo Scientific	MA3-915	Richter, K. N. et al. Comparative synaptosome imaging: a semi-quantitative method to obtain copy numbers for synaptic and neuronal proteins. Sci. Rep. 8, 14838 (2018).
Nav1.1	rabbit	100	Merck	06-811	Yuen, T. J., Browne, K. D., Iwata, A. & Smith, D. H. Sodium channelopathy induced by mild axonal trauma worsens outcome after a repeat injury. J. Neurosci. Res. 87, 3620–5 (2009).
Nav1.3	rabbit	250	Alomone Labs	ASC-004	Control antigen
Neurofilament H	rabbit	1000	LSBio	LS-C143052	Clear observation of filaments, as expected from the literature. Shown in Supplementary Data File 1. Similar pattern to Neurofilament L. Similar STED fluorescence pattern to multiple previous STED publications: Meyer, L. et al. Dual-color STED microscopy at 30-nm focal-plane resolution. Small 4, 1095–1100 (2008); Donnert, G. et al. Macromolecular-scale resolution in biological fluorescence micros…
Neurofilament L	rabbit	500	Synaptic Systems	171 002	Richter, K. N. et al. Glyoxal as an alternative fixative to formaldehyde in immunostaining and super‐resolution microscopy. EMBO J. e201695709 (2017) doi:10.15252/embj.201695709.
nNOS	rabbit	100	Thermo Scientific	PA1-033	Richter, K. N. et al. Comparative synaptosome imaging: a semi-quantitative method to obtain copy numbers for synaptic and neuronal proteins. Sci. Rep. 8, 14838 (2018).
NSF	rabbit	500	Synaptic Systems	123 002	Wilhelm, B. G. et al. Composition of isolated synaptic boutons reveals the amounts of vesicle trafficking proteins. Science 344, 1023–8 (2014).
Olig2	rabbit	500	Synaptic Systems	292 003	Presence only in subset of cells with oligodendrocyte morphology. Missing in all other cells. Data analyzed in Extended Data Fig. 2.
Parvalbumin	rabbit	500	Swant	PV25	K.O. validated
PSD93	rabbit	300	Invitrogen	34-4700	Nonaka, M., Doi, T., Fujiyoshi, Y., Takemoto-Kimura, S. & Bito, H. Essential contribution of the ligand-binding βB/βC loop of PDZ1 and PDZ2 in the regulation of postsynaptic clustering, scaffolding, and localization of postsynaptic density-95. J. Neurosci. 26, 763–774 (2006).
PSD95	rabbit	100	Cell Signaling	3450	Richter, K. N. et al. Glyoxal as an alternative fixative to formaldehyde in immunostaining and super‐resolution microscopy. EMBO J. e201695709 (2017) doi:10.15252/embj.201695709.
Rab11	rabbit	100	Cell Signaling	3539	Richter, K. N. et al. Comparative synaptosome imaging: a semi-quantitative method to obtain copy numbers for synaptic and neuronal proteins. Sci. Rep. 8, 14838 (2018).
Rab3	mouse	100	BD Biosciences	610379	Wilhelm, B. G. et al. Composition of isolated synaptic boutons reveals the amounts of vesicle trafficking proteins. Science 344, 1023–8 (2014).
Rab4	mouse	100	BD Biosciences	610888	Sarkar, S. et al. PKCζ is required for microtubule-based motility of vesicles containing the ntcp transporter. Traffic 7, 1078–1091 (2006).
Rab5	mouse	100	Jahn Laboratory	cl. 621.3	Richter, K. N. et al. Comparative synaptosome imaging: a semi-quantitative method to obtain copy numbers for synaptic and neuronal proteins. Sci. Rep. 8, 14838 (2018).
Rab7	rabbit	100	Cell Signaling	9367	Richter, K. N. et al. Comparative synaptosome imaging: a semi-quantitative method to obtain copy numbers for synaptic and neuronal proteins. Sci. Rep. 8, 14838 (2018).
Rab9	rabbit	100	Cell Signaling	5118	Ma, D. et al. Upon Infection, Cellular WD Repeat-Containing Protein 5 (WDR5) Localizes to Cytoplasmic Inclusion Bodies and Enhances Measles Virus Replication. J. Virol. 92, 1–16 (2018); Chen, D. et al. GILT restricts the cellular entry mediated by the envelope glycoproteins of SARS-CoV, Ebola virus and Lassa fever virus. Emerg. Microbes Infect. 8, 1511–1523 (2019); Want, A. et al. Autophagy and m…
Rapsyn	rabbit	100	Atlas Antibodies	HPA039475	Richter, K. N. et al. Comparative synaptosome imaging: a semi-quantitative method to obtain copy numbers for synaptic and neuronal proteins. Sci. Rep. 8, 14838 (2018).
Ribosomal protein L7a	rabbit	100	Cell Signaling	2403	Willett, M., Pollard, H. J., Vlasak, M. & Morley, S. J. Localization of ribosomes and translation initiation factors to talin/β3-integrin-enriched adhesion complexes in spreading and migrating mammalian cells. Biol. Cell 102, 265–276 (2010).
Ribosomal protein S3	rabbit	50	Cell Signaling	9538	Kobayashi, M. et al. The ubiquitin hybrid gene UBA52 regulates ubiquitination of ribosome and sustains embryonic development. Sci. Rep. 6, 36780 (2016).
Ribosomal protein S6	rabbit	100	Cell Signaling	2217	Tripathi, P. et al. Reactive Astrocytes Promote ALS-like Degeneration and Intracellular Protein Aggregation in Human Motor Neurons by Disrupting Autophagy through TGF-β1. Stem Cell Reports 9, 667–680 (2017).
Sec22b	rabbit	100	Synaptic Systems	186 003	K.D. validated
Septin7	rabbit	50	Atlas Antibodies	HPA029524	Richter, K. N. et al. Comparative synaptosome imaging: a semi-quantitative method to obtain copy numbers for synaptic and neuronal proteins. Sci. Rep. 8, 14838 (2018).
Shank1	rabbit	500	Synaptic Systems	162 013	K.O. validated
Shank2	rabbit	500	Synaptic Systems	162 202	K.O. validated
Shank3	rabbit	500	Synaptic Systems	162 302	K.O. validated
SMI310	mouse	200	Abcam	24570	Torres-Rosas, R. et al. Dopamine mediates vagal modulation of the immune system by electroacupuncture. Nat. Med. 20, 291–5 (2014).
SNAP29	rabbit	500	Synaptic Systems	111 302	K.O. validated
SNAP47	rabbit	200	Synaptic Systems	111 403	Richter, K. N. et al. Comparative synaptosome imaging: a semi-quantitative method to obtain copy numbers for synaptic and neuronal proteins. Sci. Rep. 8, 14838 (2018).
SNAP23	rabbit	100	Synaptic Systems	111 202	K.O. validated
SNAP25	mouse	100	Synaptic Systems	111 011	K.O. validated
Synaptophysin	guinea pig	1000	Synaptic Systems	101 004	Control antigen
Synaptotagmin4	rabbit	1000	Synaptic Systems	105 143	K.O. validated
Synaptotagmin5/9	rabbit	100	Synaptic Systems	105 053	K.O. validated
Synaptotagmin7	rabbit	250	Synaptic Systems	105 173	K.O. validated
SynGAP1	rabbit	1000	Thermo Scientific	PA1-046	Richter, K. N. et al. Comparative synaptosome imaging: a semi-quantitative method to obtain copy numbers for synaptic and neuronal proteins. Sci. Rep. 8, 14838 (2018).
Syntaxin1	mouse	200	Synaptic Systems	110 011	Control antigen
Syntaxin13	mouse	100	Jahn Laboratory	cl. 151.1	Wilhelm, B. G. et al. Composition of isolated synaptic boutons reveals the amounts of vesicle trafficking proteins. Science 344, 1023–8 (2014).
Syntaxin16	rabbit	100	Synaptic Systems	110 162	Control antigen
Syntaxin2	rabbit	100	Synaptic Systems	110 022	Control antigen
Syntaxin3	rabbit	100	Synaptic Systems	110 033	Control antigen
Syntaxin4	rabbit	100	Synaptic Systems	110 042	Control antigen
Syntaxin5	rabbit	100	Synaptic Systems	110 053	K.D. validated
Syntaxin6	rabbit	100	Cell Signaling	2869	Richter, K. N. et al. Comparative synaptosome imaging: a semi-quantitative method to obtain copy numbers for synaptic and neuronal proteins. Sci. Rep. 8, 14838 (2018).
Syntaxin8	rabbit	100	Synaptic Systems	110 083	Control antigen
TGN38	rabbit	100	Sigma-Aldrich	T9826	Cattin-Ortolá, J., Topalidou, I., Dosey, A., Merz, A. J. & Ailion, M. The dense-core vesicle maturation protein CCCP-1 binds RAB-2 and membranes through its C-terminal domain. Traffic 18, 720–732 (2017).
TOM20	mouse	200	Sigma-Aldrich	WH0009804M1	Richter, K. N. et al. Comparative synaptosome imaging: a semi-quantitative method to obtain copy numbers for synaptic and neuronal proteins. Sci. Rep. 8, 14838 (2018).
Transferrin Receptor	rabbit	100	Abcam	ab84036	Connor, M. G. et al. Yersinia pestis targets the host endosome recycling pathway during the biogenesis of the yersinia-containing vacuole to avoid killing by macrophages. MBio 9, 1–19 (2018).
TrkB	rabbit	500	Abcam	ab33655	Osborne, A., Wang, A. X. Z., Tassoni, A., Widdowson, P. S. & Martin, K. R. Design of a Novel Gene Therapy Construct to Achieve Sustained Brain-Derived Neurotrophic Factor Signaling in Neurons. Hum. Gene Ther. 29, 828–841 (2018).
vAChT	rabbit	100	Synaptic Systems	139 103	K.O. validated
Vamp1	rabbit	500	Synaptic Systems	104 002	Control antigen
Vamp2	mouse	1000	Synaptic Systems	104 211	K.O. validated
VAMP7	rabbit	100	Abcam	ab68776	Richter, K. N. et al. Comparative synaptosome imaging: a semi-quantitative method to obtain copy numbers for synaptic and neuronal proteins. Sci. Rep. 8, 14838 (2018).
Vti1a	mouse	100	BDBiosciences	611220	Wilhelm, B. G. et al. Composition of isolated synaptic boutons reveals the amounts of vesicle trafficking proteins. Science 344, 1023–8 (2014).

## Sheet: Secondary antibodies
Secondary antibodies
Target protein	Species	Dilution	Manufacturer	Catalogue Number
Alexa488 anti guinea pig	goat	100	Dianova	A-11073
ATTO647N anti mouse	goat	500	Rockland	610-156-121
ATTO647N anti rabbit	goat	500	Rockland	611-156-122
Cy3 Fab anti mouse (for Homer1)	goat	100	Dianova	715-166-150
Cy3 Fab anti rabbit (for Homer1)	goat	100	Dianova	711-166-152
STAR635P nanobody anti guinea pig	lama	1000	Nanotag	N0602
IRDye680RD anti mouse	donkey	10000	Licor	926-68072
IRDye680RD anti rabbit	donkey	10000	Licor	926-68073

## Sheet: Chemicals
Chemicals
Chemical	Used for	Dilution	Manufacturer	Catalogue Number
Hoechst	nuclei	2000	Thermo Scientific	62249
Phalloidin-ATTO647N	Actin	1000	Sigma-Aldrich	65906-10NMOL

## Sheet: Purified proteins
Purified proteins
Protein	Manufacturer	Catalogue number
Dopamine receptor 1	Abnova	H00001812-G01
Dopamine receptor 2	Abnova	H00001813-G01
LNGFR	Novus Biologicals	NBP2-52198
mGluR2	Abnova	H00002912-G01
Rapsyn	Novus Biologicals	NBP2-23403
VAMP2	Reinhard Jahn (MPI bpc, Göttingen, Germany)	rat, amino acids 1-116
