# Supplementary material for: A large-scale nanoscopy and biochemistry analysis of postsynaptic dendritic spines
Source: Springer Nature journal article supplement (doi:10.1038/s41593-021-00874-w), 2021-06-24
Supplement: MOESM4 [file 41593_2021_874_MOESM4_ESM.xlsx]

## Sheet: Sheet1
Protein	Correlation coefficient stubby to mushroom	Neuron copy number	Percent in synapses	Copy number from synaptosomes	Spine copy number	Mushroom spine copy number	Stubby Spine copy number	Mushroom percentage protein	Stubby percentage protein	Mushroom Molarity	Stubby Molarity	Mushroom PSD number	Stubby PSD number	Mushroom PSD percentage	Stubby PSD percentage	Function	Comment
Actin	0.483	481057719.6 ± 45433802.4	0.0852		213638.4 ± 31711.4	241916.1 ± 35908.8	185822.6 ± 27582.6	49.3 ± 7.3	32.6 ± 4.8	3072.4 ± 456	1756.2 ± 260.7	95755 ± 14213.4	69304 ± 10287.1	39.6 ± 5.9	37.3 ± 37.3	cytoskeleton
ADAM22	0.358	89590 ± 18537.6	0.048		6.1 ± 2.8	5.2 ± 2.4	7.5 ± 3.4	0 ± 0	0 ± 0	0.1 ± 0	0.1 ± 0	1 ± 0.5	0 ± 0	19.1 ± 8.7	0 ± 0	Signaling
Akt	0.871	395481.9 ± 58959.4	0.0518		24.2 ± 11	22.6 ± 10.3	22.3 ± 10.2	0 ± 0	0 ± 0	0.3 ± 0.1	0.2 ± 0.1	5 ± 2.3	0 ± 0	22.2 ± 10.1	0 ± 0	Signaling
alpha-beta SNAP	0.042	9929012.8 ± 386529.3	0.0693		2076.6 ± 354	1948.9 ± 332.2	2351.8 ± 400.9	0.3 ± 0.1	0.3 ± 0.1	24.8 ± 4.2	22.2 ± 3.8	498 ± 84.9	461 ± 78.6	25.6 ± 4.4	19.6 ± 19.6	SNAREs
alpha-internexin	0.681	12483426 ± 1142313.6	0.0558		648.1 ± 722.3	660.1 ± 735.6	469.1 ± 522.8	0.2 ± 0.2	0.1 ± 0.1	8.4 ± 9.3	4.4 ± 4.9	34 ± 37.9	18 ± 20.1	5.2 ± 5.7	3.8 ± 3.8	cytoskeleton
AP180	0.854	195342.7 ± 99496.9	0.0513		15.1 ± 10	14.1 ± 9.3	15 ± 9.9	0 ± 0	0 ± 0	0.2 ± 0.1	0.1 ± 0.1	0 ± 0	2 ± 1.3	0 ± 0	13.3 ± 13.3	Exo-/Endocytosis cofactors
APP	0.09	769809.8 ± 74017.4	0.0615		121.2 ± 29.9	87.5 ± 21.6	152.2 ± 37.6	0 ± 0	0.1 ± 0	1.1 ± 0.3	1.4 ± 0.4	4 ± 1	4 ± 1	4.6 ± 1.1	2.6 ± 2.6	Signaling
Arc	0.57	23101133.8 ± 6022734.4	0.0496		3291.3 ± 0	2885.4 ± 0	3549.6 ± 0	0.6 ± 0	0.7 ± 0	36.6 ± 0	33.5 ± 0	543 ± 0	536 ± 0	18.8 ± 0	15.1 ± 15.1	Signaling	Spine copy number taken from literature. Neuron copy number extrapolated from corrected spine copy number
BDNF	-0.503	316783.2 ± 67934	0.0347		70.9 ± 18.2	52.9 ± 13.6	100.8 ± 25.9	0 ± 0	0 ± 0	0.7 ± 0.2	1 ± 0.2	0 ± 0	0 ± 0	0 ± 0	0 ± 0	Signaling
beta-2-spectrin	0.182	198535936.9 ± 293727058.6	0.0399	649.5	5591.1 ± 3922.8	4937.4 ± 3464.2	6899 ± 4840.5	6.5 ± 4.6	7.8 ± 5.5	62.7 ± 44	65.2 ± 45.7	354 ± 248.4	751 ± 526.9	7.2 ± 5	10.9 ± 10.9	cytoskeleton	Corrected with Synaptosome data. Neuron copy number extrapolated from corrected spine copy number
beta-3-tubulin	0.641	57157820 ± 3311132	0.066		not detected	not detected	not detected	not detected	not detected	not detected	not detected	not detected	not detected	not detected	not detected	cytoskeleton
beta-tubulin	0.735	669979114.3 ± 8363767.6	0.0516		54900.4 ± 22979.8	42095.1 ± 17619.8	75104.1 ± 31436.5	10.5 ± 4.4	16.2 ± 6.8	534.6 ± 223.8	709.8 ± 297.1	4317 ± 1807	6460 ± 2704	10.3 ± 4.3	8.6 ± 8.6	cytoskeleton
Calbindin-D28K	-0.599	5458926.1 ± 584718.7	0.056		785.1 ± 190.9	685.3 ± 166.6	959 ± 233.2	0.1 ± 0	0.1 ± 0	8.7 ± 2.1	9.1 ± 2.2	138 ± 33.6	246 ± 59.8	20.1 ± 4.9	25.7 ± 25.7	Signaling
Calcineurin	-0.54	9397256.7 ± 917478	0.0804		5086.7 ± 660.3	5205 ± 675.6	5090.3 ± 660.7	1.5 ± 0.2	1.2 ± 0.2	66.1 ± 8.6	48.1 ± 6.2	1920 ± 249.2	1797 ± 233.3	36.9 ± 4.8	35.3 ± 35.3	Signaling
Calmodulin	0.713	287210966.5 ± 61193722.7	0.086		36712.8 ± 17167.3	32696.6 ± 15289.2	39629.3 ± 18531	2.7 ± 1.3	2.8 ± 1.3	415.2 ± 194.2	374.5 ± 175.1	6188 ± 2893.6	4793 ± 2241.3	18.9 ± 8.8	12.1 ± 12.1	Signaling
Calreticulin	0.644	24658920.2 ± 2226817.7	0.0408		2222.9 ± 673.6	1479.3 ± 448.3	3126.5 ± 947.4	0.3 ± 0.1	0.6 ± 0.2	18.8 ± 5.7	29.5 ± 9	0 ± 0	0 ± 0	0 ± 0	0 ± 0	Organelles
Calretinin	0.798	914295.6 ± 370757.9	0.045		66.2 ± 34.4	59 ± 30.7	73.2 ± 38.1	0 ± 0	0 ± 0	0.7 ± 0.4	0.7 ± 0.4	12 ± 6.2	4 ± 2.1	20.3 ± 10.6	5.5 ± 5.5	Signaling
CaMKII	0.64	40160274 ± 3071548.5	0.0884		32336.3 ± 4031.2	25863.6 ± 3224.3	42099.6 ± 5248.3	7.9 ± 1	11 ± 1.4	328.5 ± 40.9	397.9 ± 49.6	7337 ± 914.7	19450 ± 2424.7	28.4 ± 3.5	46.2 ± 46.2	Signaling
CAPS1	-0.029	571879.4 ± 18123.2	0.0593		218.8 ± 35.4	179.6 ± 29.1	290.2 ± 47	0.1 ± 0	0.2 ± 0	2.3 ± 0.4	2.7 ± 0.4	52 ± 8.4	35 ± 5.7	29 ± 4.7	12.1 ± 12.1	Signaling
Cav1.3	0.026	1623 ± 491.1	0.0748		0.5 ± 0.2	0.4 ± 0.1	0.6 ± 0.2	0 ± 0	0 ± 0	0 ± 0	0 ± 0	0 ± 0	0 ± 0	0 ± 0	0 ± 0	Ion Channels
Cav2.1	0.809	188693.9 ± 68885.8	0.0788	15.3	42.2 ± 12.4	32.5 ± 9.6	54.8 ± 16.1	0 ± 0	0.1 ± 0	0.4 ± 0.1	0.5 ± 0.2	2 ± 0.6	7 ± 2.1	6.2 ± 1.8	12.8 ± 12.8	Ion Channels	Corrected with Synaptosome data. Neuron copy number extrapolated from corrected spine copy number
CDC42	0.865	19193307.9 ± 1363601	0.0737		897 ± 877.5	727.6 ± 711.8	1139.6 ± 1114.8	0.1 ± 0.1	0.1 ± 0.1	9.2 ± 9	10.8 ± 10.5	75 ± 73.4	67 ± 65.5	10.3 ± 10.1	5.9 ± 5.9	Signaling
ChromograninA	-0.295	23006.7 ± 5194.7	0.0545		3.6 ± 1.2	3.3 ± 1.1	4.1 ± 1.4	0 ± 0	0 ± 0	0 ± 0	0 ± 0	0 ± 0	0 ± 0	0 ± 0	0 ± 0	Signaling
ChromograninB	-0.514	137429.7 ± 19202.2	0.0566		28.1 ± 7	28.3 ± 7	31.4 ± 7.8	0 ± 0	0 ± 0	0.4 ± 0.1	0.3 ± 0.1	0 ± 0	0 ± 0	0 ± 0	0 ± 0	Signaling
ChromograninC	-0.13	163866 ± 29059.1	0.0524		76.1 ± 16.3	65.3 ± 14	97.7 ± 21	0 ± 0	0 ± 0	0.8 ± 0.2	0.9 ± 0.2	0 ± 0	0 ± 0	0 ± 0	0 ± 0	Signaling
Clathrin heavy chain	-0.507	5246065.6 ± 725934	0.0754		1102 ± 239.7	848.5 ± 184.5	1384.3 ± 301.1	0.8 ± 0.2	1.1 ± 0.2	10.8 ± 2.3	13.1 ± 2.8	178 ± 38.7	203 ± 44.2	21 ± 4.6	14.7 ± 14.7	Exo-/Endocytosis cofactors
Clathrin light chain	0.276	37063124.7 ± 3129866.2	0.094		11708.3 ± 2349.5	10105.7 ± 2027.9	13270.1 ± 2662.9	1.2 ± 0.3	1.4 ± 0.3	128.3 ± 25.8	125.4 ± 25.2	2654 ± 532.6	1424 ± 285.7	26.3 ± 5.3	10.7 ± 10.7	Exo-/Endocytosis cofactors
Cortactin	0.781	1298507.4 ± 190151.8	0.0606		121.2 ± 51	101.6 ± 42.8	161.6 ± 68	0 ± 0	0 ± 0	1.3 ± 0.5	1.5 ± 0.6	10 ± 4.2	13 ± 5.5	9.8 ± 4.1	8 ± 8	cytoskeleton
DLGAP1	-0.17	57934.1 ± 13537.9	0.0511		5.3 ± 2.3	3.7 ± 1.6	7.3 ± 3.2	0 ± 0	0 ± 0	0 ± 0	0.1 ± 0	0 ± 0	1 ± 0.4	0 ± 0	13.7 ± 13.7	PSD
DopamineD1	0.494	1688583.2 ± 626867.3	0.0643		not detected	not detected	not detected	not detected	not detected	not detected	not detected	not detected	not detected	not detected	not detected	Receptor	Measured with quantitative dot blot.
DopamineD2	-0.142	618111.3 ± 168121.4	0.0459		66.9 ± 24.1	65.8 ± 23.7	72.2 ± 26	0 ± 0	0 ± 0	0.8 ± 0.3	0.7 ± 0.2	9 ± 3.2	6 ± 2.2	13.7 ± 4.9	8.3 ± 8.3	Receptor	Measured with quantitative dot blot.
Drebrin1	0.548	6331446.3 ± 88419.8	0.1506		5598.9 ± 624.1	5459.6 ± 608.5	6210.3 ± 692.2	2.1 ± 0.2	2 ± 0.2	69.3 ± 7.7	58.7 ± 6.5	2072 ± 230.9	2513 ± 280.1	38 ± 4.2	40.5 ± 40.5	cytoskeleton
Dynamin1/2/3	-0.39	6435888 ± 251140.2	0.079		1495.6 ± 299.5	1355.2 ± 271.3	1525.6 ± 305.5	0.6 ± 0.1	0.6 ± 0.1	17.2 ± 3.4	14.4 ± 2.9	394 ± 78.9	121 ± 24.2	29.1 ± 5.8	7.9 ± 7.9	Exo-/Endocytosis cofactors
ERp72	-0.768	1159270 ± 165411.4	0.0478		97.3 ± 26.5	73.7 ± 20.1	119.6 ± 32.6	0 ± 0	0 ± 0	0.9 ± 0.3	1.1 ± 0.3	0 ± 0	0 ± 0	0 ± 0	0 ± 0	Organelles
GluK1	-0.376	981570 ± 267396.4	0.0634		165.8 ± 55.7	158.9 ± 53.4	179.8 ± 60.4	0.1 ± 0	0.1 ± 0	2 ± 0.7	1.7 ± 0.6	26 ± 8.7	27 ± 9.1	16.4 ± 5.5	15 ± 15	Receptor
GluN1	0.787	602749.5 ± 80650.8	0.0694	138.3	247.5 ± 24.9	214.8 ± 21.6	282.6 ± 28.4	0.1 ± 0	0.1 ± 0	2.7 ± 0.3	2.7 ± 0.3	55 ± 5.5	139 ± 14	25.6 ± 2.6	49.2 ± 49.2	Receptor	Corrected with Synaptosome data. Neuron copy number extrapolated from corrected spine copy number
GluN2A	0.83	20863.6 ± 358.3	0.061		2.2 ± 0.7	1.7 ± 0.6	2.9 ± 0.9	0 ± 0	0 ± 0	0 ± 0	0 ± 0	0 ± 0	0 ± 0	0 ± 0	0 ± 0	Receptor
GluN2B	0.984	757451.7 ± 105875.3	0.0606	83.6	355.2 ± 40.7	319.9 ± 36.7	433.7 ± 49.7	0.3 ± 0	0.3 ± 0	4.1 ± 0.5	4.1 ± 0.5	152 ± 17.4	253 ± 29	47.5 ± 5.4	58.3 ± 58.3	Receptor	Corrected with Synaptosome data. Neuron copy number extrapolated from corrected spine copy number
GluR1	0.599	976411.9 ± 196915.5	0.0656	43.6	279.5 ± 41.8	236.4 ± 35.4	326.9 ± 48.9	0.1 ± 0	0.1 ± 0	3 ± 0.4	3.1 ± 0.5	62 ± 9.3	47 ± 7	26.2 ± 3.9	14.4 ± 14.4	Receptor	Corrected with Synaptosome data. Neuron copy number extrapolated from corrected spine copy number
GluR2	0.186	4227066.8 ± 612238.7	0.0551	229.5	1082.8 ± 98.5	872 ± 79.3	1411 ± 128.3	0.4 ± 0	0.6 ± 0.1	11.1 ± 1	13.3 ± 1.2	204 ± 18.6	230 ± 20.9	23.4 ± 2.1	16.3 ± 16.3	Receptor	Corrected with Synaptosome data. Neuron copy number extrapolated from corrected spine copy number
GluR3	0.107	9500147.4 ± 3457585.3	0.044	173	992.4 ± 198.5	792.2 ± 158.5	1361.1 ± 272.3	0.4 ± 0.1	0.6 ± 0.1	10.1 ± 2	12.9 ± 2.6	56 ± 11.2	101 ± 20.2	7.1 ± 1.4	7.4 ± 7.4	Receptor	Corrected with Synaptosome data. Neuron copy number extrapolated from corrected spine copy number
GRIP	0.9	77266 ± 16985.7	0.0371		5 ± 1.8	4.4 ± 1.5	6.1 ± 2.1	0 ± 0	0 ± 0	0.1 ± 0	0.1 ± 0	0 ± 0	0 ± 0	0 ± 0	0 ± 0	Exo-/Endocytosis cofactors
Homer1	0.958	1523247.1 ± 206153.6	0.1261		1729.9 ± 270.1	1255.4 ± 196	2700.6 ± 421.6	0.3 ± 0	0.5 ± 0.1	15.9 ± 2.5	25.5 ± 4	747 ± 116.6	1879 ± 293.3	59.5 ± 9.3	69.6 ± 69.6	PSD
Homer2	0.978	36366.1 ± 17530.4	0.0732		11.5 ± 5.6	9.7 ± 4.8	14.6 ± 7.2	0 ± 0	0 ± 0	0.1 ± 0.1	0.1 ± 0.1	5 ± 2.5	7 ± 3.4	51.5 ± 25.3	48 ± 48	PSD
Homer3	0.973	265383.1 ± 60615.3	0.0926		169.7 ± 41.2	160.5 ± 39	199.4 ± 48.4	0 ± 0	0 ± 0	2 ± 0.5	1.9 ± 0.5	76 ± 18.4	92 ± 22.3	47.3 ± 11.5	46.1 ± 46.1	PSD
HSC70	0.59	551216.8 ± 107438	0.0754		199.2 ± 44.9	137.3 ± 30.9	276 ± 62.1	0 ± 0	0.1 ± 0	1.7 ± 0.4	2.6 ± 0.6	24 ± 5.4	71 ± 16	17.5 ± 3.9	25.7 ± 25.7	Exo-/Endocytosis cofactors
IGF1R	0.104	-31051615 ± -56346304.2	0.0542		350.2 ± 0	296.2 ± 0	400.8 ± 0	0.2 ± 0	0.3 ± 0	3.8 ± 0	3.8 ± 0	44 ± 0	43 ± 0	14.9 ± 0	10.7 ± 10.7	Receptor	Spine copy number taken from literature. Neuron copy number extrapolated from corrected spine copy number
Kir2.1	0.629	not detected	0.073		not detected	not detected	not detected	not detected	not detected	not detected	not detected	not detected	not detected	not detected	not detected	Ion Channels
Kv1.1	0.367	108526.4 ± 12341.5	0.0742		20.2 ± 4.2	18.5 ± 3.8	23.1 ± 4.8	0 ± 0	0 ± 0	0.2 ± 0	0.2 ± 0	7 ± 1.4	4 ± 0.8	37.8 ± 7.8	17.3 ± 17.3	Ion Channels
Kv2.1	-0.324	3092 ± 886.1	0.07		0.4 ± 0.1	0.3 ± 0.1	0.4 ± 0.2	0 ± 0	0 ± 0	0 ± 0	0 ± 0	0 ± 0	0 ± 0	0 ± 0	0 ± 0	Ion Channels
LNGFR	-0.936	2945133.1 ± 1352814.7	0.0489		535.5 ± 262	437 ± 213.8	692.4 ± 338.7	0.1 ± 0	0.1 ± 0.1	5.5 ± 2.7	6.5 ± 3.2	136 ± 66.5	102 ± 49.9	31.1 ± 15.2	14.7 ± 14.7	Receptor	Measured with quantitative dot blot. Corrected with Synaptosome data. Neuron copy number extrapolated from corrected spine copy number
mAChR1	-0.218	167243.2 ± 38253.7	0.0403		33.9 ± 8.7	25.9 ± 6.6	42.7 ± 10.9	0 ± 0	0 ± 0	0.3 ± 0.1	0.4 ± 0.1	6 ± 1.5	7 ± 1.8	23.2 ± 5.9	16.4 ± 16.4	Receptor
MAP2	0.65	9870823.5 ± 4489022.1	0.0763	431.2	2461.7 ± 991.2	1784.8 ± 718.7	3424.1 ± 1378.7	1.7 ± 0.7	2.8 ± 1.1	22.7 ± 9.1	32.4 ± 13	283 ± 114	399 ± 160.7	15.9 ± 6.4	11.7 ± 11.7	cytoskeleton	Corrected with Synaptosome data. Neuron copy number extrapolated from corrected spine copy number
mGluR1	-0.773	8050.9 ± 4005.3	0.0363		0.4 ± 0.3	0.4 ± 0.2	0.5 ± 0.3	0 ± 0	0 ± 0	0 ± 0	0 ± 0	0 ± 0	0 ± 0	0 ± 0	0 ± 0	Receptor
mGluR2	0.921	741301.6 ± 379907.8	0.0686	78	53.2 ± 16.6	41.9 ± 13.1	67 ± 20.9	0 ± 0	0 ± 0	0.5 ± 0.2	0.6 ± 0.2	8 ± 2.5	6 ± 1.9	19.1 ± 5.9	9 ± 9	Receptor	Measured with quantitative dot blot. Corrected with Synaptosome data. Neuron copy number extrapolated from corrected spine copy number
mGluR5	-0.526	390630.7 ± 122503	0.0781	20.7	108.3 ± 26.7	80.3 ± 19.8	152.7 ± 37.7	0.1 ± 0	0.1 ± 0	1 ± 0.3	1.4 ± 0.4	26 ± 6.4	10 ± 2.5	32.4 ± 8	6.6 ± 6.6	Receptor	Corrected with Synaptosome data. Neuron copy number extrapolated from corrected spine copy number
Myosin5a	0.655	150424230.8 ± 235143509.7	0.0606	157.2	3802.9 ± 3100.7	2986.8 ± 2435.3	4938.1 ± 4026.3	3.1 ± 2.5	4.4 ± 3.6	37.9 ± 30.9	46.7 ± 38.1	382 ± 311.5	576 ± 469.6	12.8 ± 10.4	11.7 ± 11.7	cytoskeleton	Corrected with Synaptosome data. Neuron copy number extrapolated from corrected spine copy number
Na-beta-1	0.885	714636.5 ± 139941.4	0.0909		285.4 ± 71.5	243.6 ± 61	342.1 ± 85.7	0 ± 0	0 ± 0	3.1 ± 0.8	3.2 ± 0.8	41 ± 10.3	33 ± 8.3	16.8 ± 4.2	9.6 ± 9.6	Ion Channels
Na-K-ATPase	0.451	29929991.7 ± 1624205.1	0.0639		6166.8 ± 1477.8	4473.8 ± 1072.1	8111.4 ± 1943.8	2.4 ± 0.6	3.8 ± 0.9	56.8 ± 13.6	76.7 ± 18.4	720 ± 172.5	1705 ± 408.6	16.1 ± 3.9	21 ± 21	Ion Channels
Nav1.1	0.199	81566.9 ± 6386.5	0.0602		17.7 ± 3.1	14.4 ± 2.5	21.7 ± 3.8	0 ± 0	0 ± 0	0.2 ± 0	0.2 ± 0	1 ± 0.2	2 ± 0.3	7 ± 1.2	9.2 ± 9.2	Ion Channels
Nav1.3	0.659	2645.3 ± 454.1	0.0515		0.1 ± 0.1	0.1 ± 0.1	0.1 ± 0.1	0 ± 0	0 ± 0	0 ± 0	0 ± 0	0 ± 0	0 ± 0	0 ± 0	0 ± 0	Ion Channels
Neurofilament H	0.153	428846.5 ± 342726.1	0.0676		48 ± 42.5	37.3 ± 33.1	65.9 ± 58.4	0 ± 0	0 ± 0	0.5 ± 0.4	0.6 ± 0.6	4 ± 3.5	7 ± 6.2	10.7 ± 9.5	10.6 ± 10.6	cytoskeleton
Neurofilament L	0.681	5345200.7 ± 1726386.6	0.0526		428.3 ± 248.4	371.2 ± 215.3	486.4 ± 282.1	0.1 ± 0.1	0.1 ± 0.1	4.7 ± 2.7	4.6 ± 2.7	65 ± 37.7	68 ± 39.4	17.5 ± 10.2	14 ± 14	cytoskeleton
nNOS	0.862	104564.9 ± 28042.5	0.0608		28.1 ± 8.2	23.9 ± 7	33.3 ± 9.7	0 ± 0	0 ± 0	0.3 ± 0.1	0.3 ± 0.1	7 ± 2	5 ± 1.5	29.2 ± 8.5	15 ± 15	Signaling
NSF	-0.787	10485623.2 ± 276848.8	0.0672		2916.4 ± 400.8	2343.6 ± 322.1	3721.2 ± 511.4	0.9 ± 0.1	1.3 ± 0.2	29.8 ± 4.1	35.2 ± 4.8	604 ± 83	451 ± 62	25.8 ± 3.5	12.1 ± 12.1	SNAREs
Parvalbumin	-0.929	891723.7 ± 778526.3	0.0516		74.5 ± 72.2	65.1 ± 63.1	83 ± 80.5	0 ± 0	0 ± 0	0.8 ± 0.8	0.8 ± 0.8	17 ± 16.5	12 ± 11.6	26.1 ± 25.3	14.5 ± 14.5	Signaling
PSD93	0.95	765847.1 ± 25826.4	0.0692		255.8 ± 23.6	220.7 ± 20.4	318.7 ± 29.4	0.1 ± 0	0.1 ± 0	2.8 ± 0.3	3 ± 0.3	72 ± 6.7	88 ± 8.1	32.6 ± 3	27.6 ± 27.6	PSD
PSD95	0.885	1149048 ± 116158.6	0.0864		525.2 ± 76.7	550.3 ± 80.4	539.1 ± 78.8	0.2 ± 0	0.2 ± 0	7 ± 1	5.1 ± 0.7	240 ± 35.1	261 ± 38.1	43.6 ± 6.4	48.4 ± 48.4	PSD
Rab11	0.078	18244831.1 ± 1801809	0.0628		863.5 ± 506.1	1059.3 ± 620.9	749.3 ± 439.2	0.1 ± 0.1	0.1 ± 0	13.5 ± 7.9	7.1 ± 4.2	206 ± 120.8	76 ± 44.5	19.4 ± 11.4	10.1 ± 10.1	Exo-/Endocytosis cofactors
Rab3	0.43	54783683.8 ± 2509720.8	0.0739		7270 ± 2572.7	7012.6 ± 2481.6	8139.6 ± 2880.5	0.9 ± 0.3	0.9 ± 0.3	89.1 ± 31.5	76.9 ± 27.2	543 ± 192.2	954 ± 337.6	7.7 ± 2.7	11.7 ± 11.7	Exo-/Endocytosis cofactors
Rab4	-0.148	2359845.6 ± 220211.7	8.52		212.8 ± 55.2	197.2 ± 51.2	233.3 ± 60.5	0 ± 0	0 ± 0	2.5 ± 0.6	2.2 ± 0.6	10 ± 2.6	14 ± 3.6	5.1 ± 1.3	6 ± 6	Exo-/Endocytosis cofactors
Rab5	0.247	22383583.4 ± 1784814.1	4.8		4850.6 ± 827.7	3574 ± 609.9	6685.3 ± 1140.8	0.4 ± 0.1	0.7 ± 0.1	45.4 ± 7.7	63.2 ± 10.8	439 ± 74.9	1418 ± 242	12.3 ± 2.1	21.2 ± 21.2	Exo-/Endocytosis cofactors
Rab7	0.463	36822225.3 ± 4312935.8	5.18		7539.5 ± 1488.4	5658.7 ± 1117.1	9802.5 ± 1935.2	0.6 ± 0.1	1 ± 0.2	71.9 ± 14.2	92.6 ± 18.3	538 ± 106.2	708 ± 139.8	9.5 ± 1.9	7.2 ± 7.2	Exo-/Endocytosis cofactors
Rab9	0.756	3743037.1 ± 1160145.4	6.93		53.4 ± 104.1	51.5 ± 100.3	56.3 ± 109.7	0 ± 0	0 ± 0	0.7 ± 1.3	0.5 ± 1	0 ± 0	0 ± 0	0 ± 0	0 ± 0	Exo-/Endocytosis cofactors
Rapsyn	0.111	3388460.4 ± 748084.5	5.58		206.5 ± 97.5	207.1 ± 97.7	223.9 ± 105.7	0 ± 0	0 ± 0	2.6 ± 1.2	2.1 ± 1	38 ± 17.9	27 ± 12.7	18.4 ± 8.7	12.1 ± 12.1	PSD	Measured with quantitative dot blot.
Ribosomal protein L7a	0.459	18429434.9 ± 1939750.3	5.13		241.8 ± 290.7	206.7 ± 248.5	292.9 ± 352.1	0 ± 0	0 ± 0	2.6 ± 3.2	2.8 ± 3.3	28 ± 33.7	20 ± 24	13.5 ± 16.3	6.8 ± 6.8	Organelles
Ribosomal protein S3	0.977	22971897.3 ± 2234796	6.15		1675.1 ± 618.7	1272.8 ± 470.2	2221.6 ± 820.6	0.2 ± 0.1	0.2 ± 0.1	16.2 ± 6	21 ± 7.8	140 ± 51.7	235 ± 86.8	11 ± 4.1	10.6 ± 10.6	Organelles
Ribosomal protein S6	0.89	23885770.5 ± 2685969.5	4.96		not detected	not detected	not detected	not detected	not detected	not detected	not detected	not detected	not detected	not detected	not detected	Organelles
Sec22b	0.928	8033640.6 ± 672775.5	3.47		321.1 ± 214.8	304.7 ± 203.9	371.1 ± 248.3	0 ± 0	0 ± 0	3.9 ± 2.6	3.5 ± 2.3	8 ± 5.4	10 ± 6.7	2.6 ± 1.8	2.7 ± 2.7	SNAREs
Septin7	0.564	4149665.7 ± 474108.6	3.99		838.2 ± 231.6	666.1 ± 184.1	986.2 ± 272.6	0.2 ± 0	0.2 ± 0.1	8.5 ± 2.3	9.3 ± 2.6	109 ± 30.1	83 ± 22.9	16.4 ± 4.5	8.4 ± 8.4	cytoskeleton
Shank1	0.985	923695.9 ± 190227.6	6.6	141.3	178.8 ± 27.1	149.3 ± 22.6	214.5 ± 32.5	0.2 ± 0	0.2 ± 0	1.9 ± 0.3	2 ± 0.3	49 ± 7.4	80 ± 12.1	32.8 ± 5	37.3 ± 37.3	PSD	Corrected with Synaptosome data. Neuron copy number extrapolated from corrected spine copy number
Shank2	0.257	10834453.7 ± 7438062.5	5.16	167.9	238.1 ± 79.9	255 ± 85.6	231.6 ± 77.7	0.2 ± 0.1	0.2 ± 0.1	3.2 ± 1.1	2.2 ± 0.7	50 ± 16.8	61 ± 20.5	19.6 ± 6.6	26.3 ± 26.3	PSD	Corrected with Synaptosome data. Neuron copy number extrapolated from corrected spine copy number
Shank3	0.932	283141.9 ± 49736.9	5.6	181.3	124.4 ± 20.1	95.8 ± 15.5	173.8 ± 28.1	0.1 ± 0	0.1 ± 0	1.2 ± 0.2	1.6 ± 0.3	51 ± 8.2	105 ± 17	53.2 ± 8.6	60.4 ± 60.4	PSD	Corrected with Synaptosome data. Neuron copy number extrapolated from corrected spine copy number
SNAP23	0.035	22632.7 ± 0	8.04		6 ± 0.9	4.9 ± 0.7	7.7 ± 1.2	0 ± 0	0 ± 0	0.1 ± 0	0.1 ± 0	1 ± 0	0 ± 0	20.5 ± 0	0 ± 0	SNAREs
SNAP25	0.043	76270019.6 ± 3296093.2	8.6		1966.1 ± 3626	1362.8 ± 2513.3	2922.1 ± 5389.1	0.2 ± 0.3	0.3 ± 0.5	17.3 ± 31.9	27.6 ± 50.9	113 ± 208.4	234 ± 431.6	8.3 ± 15.3	8 ± 8	SNAREs
SNAP29	-0.385	631022.8 ± 160061	4.08		54.7 ± 31.2	47.9 ± 27.3	68.2 ± 38.9	0 ± 0	0 ± 0	0.6 ± 0.3	0.6 ± 0.4	0 ± 0	0 ± 0	0 ± 0	0 ± 0	SNAREs
SNAP47	-0.586	50990.1 ± 15185.5	4.5		10 ± 3.4	10.4 ± 3.5	9.9 ± 3.4	0 ± 0	0 ± 0	0.1 ± 0	0.1 ± 0	0 ± 0	0 ± 0	0 ± 0	0 ± 0	SNAREs
Synaptotagmin4	0.639	96692 ± 19519	8.84		4.2 ± 2.2	3.1 ± 1.6	5.6 ± 2.9	0 ± 0	0 ± 0	0 ± 0	0.1 ± 0	1 ± 0.5	0 ± 0	32.5 ± 17	0 ± 0	SNAREs
Synaptotagmin5/9	0.075	1400586.5 ± 179599.9	5.93		164.4 ± 54.3	135.2 ± 44.7	219.2 ± 72.4	0 ± 0	0 ± 0	1.7 ± 0.6	2.1 ± 0.7	5 ± 1.7	6 ± 2	3.7 ± 1.2	2.7 ± 2.7	SNAREs
Synaptotagmin7	-0.305	35042.4 ± 5109.3	7.48		10.5 ± 2.3	7.1 ± 1.5	14.7 ± 3.2	0 ± 0	0 ± 0	0.1 ± 0	0.1 ± 0	0 ± 0	0 ± 0	0 ± 0	0 ± 0	SNAREs
SynGAP1	0.495	231547 ± 35936.5	7.88		131.8 ± 25.3	117.5 ± 22.6	131.7 ± 25.3	0.1 ± 0	0.1 ± 0	1.5 ± 0.3	1.2 ± 0.2	47 ± 9	36 ± 6.9	40 ± 7.7	27.3 ± 27.3	Signaling
Syntaxin13	0.991	3522048 ± 551593.1	7.37		455.7 ± 129.7	378.4 ± 107.7	529.7 ± 150.8	0.1 ± 0	0.1 ± 0	4.8 ± 1.4	5 ± 1.4	0 ± 0	0 ± 0	0 ± 0	0 ± 0	SNAREs
Syntaxin16	0.042	184711.4 ± 33565.3	5.45		54 ± 13	45.7 ± 11	68 ± 16.4	0 ± 0	0 ± 0	0.6 ± 0.1	0.6 ± 0.2	0 ± 0	0 ± 0	0 ± 0	0 ± 0	SNAREs
Syntaxin1a	0.214	16247222.1 ± 2820308.7	5.66		1806 ± 560.8	1596.2 ± 495.6	2149.3 ± 667.3	0.3 ± 0.1	0.3 ± 0.1	20.3 ± 6.3	20.3 ± 6.3	176 ± 54.6	261 ± 81	11 ± 3.4	12.1 ± 12.1	SNAREs
Syntaxin2	0.55	3413950 ± 588226.1	5.24		913.5 ± 205.8	825.5 ± 186	1114.5 ± 251.1	0.1 ± 0	0.2 ± 0	10.5 ± 2.4	10.5 ± 2.4	155 ± 34.9	108 ± 24.3	18.8 ± 4.2	9.7 ± 9.7	SNAREs
Syntaxin3	0.639	81279.9 ± 0	7.54		13.9 ± 2.5	12.4 ± 2.2	18 ± 3.3	0 ± 0	0 ± 0	0.2 ± 0	0.2 ± 0	1 ± 0	1 ± 0	8.1 ± 0	5.6 ± 5.6	SNAREs
Syntaxin4	0.353	35244.9 ± 0	9.4		7.1 ± 1.3	7.4 ± 1.3	7.6 ± 1.3	0 ± 0	0 ± 0	0.1 ± 0	0.1 ± 0	0 ± 0	0 ± 0	0 ± 0	0 ± 0	SNAREs
Syntaxin5	0.667	115366.8 ± 41933.2	6.06		7.8 ± 3.7	7.3 ± 3.5	9.1 ± 4.4	0 ± 0	0 ± 0	0.1 ± 0	0.1 ± 0	0 ± 0	0 ± 0	0 ± 0	0 ± 0	SNAREs
Syntaxin6	0.351	724286.9 ± 177387.1	5.11		38.9 ± 23.5	33 ± 19.9	46.8 ± 28.2	0 ± 0	0 ± 0	0.4 ± 0.3	0.4 ± 0.3	0 ± 0	0 ± 0	0 ± 0	0 ± 0	SNAREs
Syntaxin8	0.017	736051.6 ± 89670.7	6.43		114 ± 34.5	85 ± 25.7	152.4 ± 46	0 ± 0	0 ± 0	1.1 ± 0.3	1.4 ± 0.4	0 ± 0	0 ± 0	0 ± 0	0 ± 0	SNAREs
TfR	-0.17	840751.3 ± 93924.9	4.59		397.5 ± 79.4	368.3 ± 73.6	419.3 ± 83.8	0.2 ± 0	0.2 ± 0	4.7 ± 0.9	4 ± 0.8	53 ± 10.6	63 ± 12.6	14.4 ± 2.9	15 ± 15	Exo-/Endocytosis cofactors
TGN38	0.797	63527 ± 8730.4	15.06		1.4 ± 1.7	1.2 ± 1.4	1.6 ± 1.9	0 ± 0	0 ± 0	0 ± 0	0 ± 0	0 ± 0	0 ± 0	0 ± 0	0 ± 0	Organelles
TOM20	0.871	5717233.5 ± 1289921.8	7.9		406.8 ± 224.3	281.6 ± 155.3	544.3 ± 300.1	0 ± 0	0 ± 0	3.6 ± 2	5.1 ± 2.8	0 ± 0	0 ± 0	0 ± 0	0 ± 0	Organelles
TrkB	0.772	1995707.5 ± 1446778.7	4.78		141.5 ± 52.9	124.3 ± 46.5	140.2 ± 52.4	0.1 ± 0	0.1 ± 0	1.6 ± 0.6	1.3 ± 0.5	15 ± 5.6	14 ± 5.2	12.1 ± 4.5	10 ± 10	Receptor
VAMP1	-0.214	2485719.9 ± 722352.8	6.34		363.4 ± 134.4	334.3 ± 123.6	447.7 ± 165.6	0 ± 0	0 ± 0	4.2 ± 1.6	4.2 ± 1.6	0 ± 0	0 ± 0	0 ± 0	0 ± 0	SNAREs
VAMP2	0.88	18720616.2 ± 8591610.7	6.94		2045 ± 1165.3	2050.9 ± 1168.7	2134.7 ± 1216.4	0.1 ± 0.1	0.1 ± 0.1	26 ± 14.8	20.2 ± 11.5	0 ± 0	0 ± 0	0 ± 0	0 ± 0	SNAREs	Measured with quantitative dot blot.
VAMP7	-0.556	798340.7 ± 149212.5	6.1		109.5 ± 42.8	97.2 ± 38	116.2 ± 45.4	0 ± 0	0 ± 0	1.2 ± 0.5	1.1 ± 0.4	0 ± 0	2 ± 0.8	0 ± 0	1.7 ± 1.7	SNAREs
Vti1a	0.232	952127 ± 557332.5	6.06		119.4 ± 75.5	104.6 ± 66.2	142.4 ± 90.1	0 ± 0	0 ± 0	1.3 ± 0.8	1.3 ± 0.9	0 ± 0	0 ± 0	0 ± 0	0 ± 0	SNAREs
