# Supplementary material for: A large-scale nanoscopy and biochemistry analysis of postsynaptic dendritic spines
Source: Springer Nature journal article supplement (doi:10.1038/s41593-021-00874-w), 2021-06-24
Supplement: MOESM6 [file 41593_2021_874_MOESM6_ESM.xlsx]

## Sheet: Tabelle1
Protein	Authors	doi	PMID	Function	Location	Interaction
Actin	Bär et al., 2016, Sci. Rep.	10.1038/srep37136	27841352		180 nm rings
Actin	Burette et al., 2012, J. Comp. Neurol.	10.1002/cne.23067	22684938		Mesh structure in head
Actin	Chaezeau et al., 2014, Cell. Mol. Life Sci.	10.1007/s00018-016-2214-1	27105623		Actin nucleation at PSD
Actin	D’Este et al., 2015, Cell Rep.	10.1016/j.celrep.2015.02.007	25732815		180 nm rings	beta-2-spectrin
Actin	D’Este et al., 2016, Sci. Rep.	10.1038/srep22741	26947559
Actin	Korobova and Svitkina, 2010, Mol. Biol. Cell	10.1091/mbc.e09-07-0596	19889835		Mesh structure in head
Actin	Sidenstein et al., 2016, Sci. Rep.	10.1038/srep26725	27220554		180 nm rings
Actin	Xu et al., 2013, Science	10.1126/science.1232251	23239625		180 nm rings	beta-2-spectrin
ADAM22	D’Abaco et al., 2006, Neurosurgery	10.1227/01.NEU.0000192363.84287.8B	16385342	nteracts with integrin alphavbeta3 and integrin dimers containing alpa6 or alpa9
ADAM22	Fukata et al., 2006, Science	10.1126/science.1129947	16990550	Regulates AMPAR through interaction with LGI
ADAM22	Lovero et al., 2015, Proc. Natl. Acad. Sci. U S A	10.1073/pnas.1511910112	26178195			PSD95
ADAM22	Ogawa et al., 2010, J. Neurosci.	10.1523/JNEUROSCI.4661-09.2010	20089912			Kv1 channels and PSD95, although they show exlusion from the dendrites in cultured hippocampal neurons?!
ADAM22	Poindexter et al., 1999, Gene	10.1016/S0378-1119(99)00302-9	10524237	Highly expressed in the brain, one of the three catalytically inactive ADAMS
ADAM22	Sagane et al., 1998, Biochem. J.	10.1042/bj3340093	9693107	Highly expressed in the brain, one of the three catalytically inactive ADAMS
Akt	Dimmeler et al., 1999, Nature	10.1038/21224	10376603	activates nNOs
Akt	Fulton et al., 1999, Nature	10.1038/21218	10376602	activates nNOs
Akt	Gobert et al., 2008, J. Neurochem.	10.1111/j.1471-4159.2008.05470.x	18466337	Regulates AMPAR expression during LTP
Akt	Karpova et al., 2006, J. Neurosci.	10.1016/J.NEUROSCIENCE.2005.10.012	16326012	Mediates downstream effekts of PI3-K, like cell survivla, proliferation. Regulates AMPAR expression during LTP
Akt	Kennedy et al., 1997, Genes & Dev.	10.1101/gad.11.6.701	9087425	Mediates downstream effekts of PI3-K, like cell survivla, proliferation
Akt	Kennedy et al., 1999, Mol. Cell. Biol.	10.1128/MCB.19.8.5800	10409766	Mediates downstream effekts of PI3-K, like cell survivla, proliferation
Akt	Man et al., 2003, Neuron	10.1016/S0896-6273(03)00228-9	12765612	Regulates AMPAR expression during LTP
Akt	Pen et al., 2016, Hippocampus	10.1002/hipo.22597	27068236	Regulates AMPAR expression during LTP
Akt	Qin et al., 2005, Genes & Dev.	10.1101/gad.342205	16107614	Regulates AMPAR expression during LTP
Akt	Schratt et al., 2004, J. Neurosci.	10.1523/JNEUROSCI.1739-04.2004	15317862	Regulates AMPAR expression during LTP
Akt	Wang et al., 2011, Br. J. Pharmacol.	10.1111/j.1476-5381.2010.01143.x	21133890	PI3K/Akt pathway is activated by NMDAR
Akt	Znamensky et al., 2003, J. Neurosci.	10.1523/JNEUROSCI.23-06-02340.2003	12657693		Found in many shafts and sometimes in spines. Associates with Spine apparatus, ER, polyribosomes and PM.
Alpha beta SNAP	Clary et al., 1990, Cell	10.1016/0092-8674(90)90482-T	2111733	Bring SNARE complex to NSF for disassembly
Alpha beta SNAP	Hanson et al., 1995, J. Biol. Chem.	10.1074/jbc.270.28.16955	7622514	Bring SNARE complex to NSF for disassembly
Alpha beta SNAP	Hohl et al., 1998, Mol. Cell	10.1016/s1097-2765(00)80153-7	9844627	Bring SNARE complex to NSF for disassembly
Alpha beta SNAP	Söllner et al., 1993a, Nature	10.1038/362318a0	8455717	Bring SNARE complex to NSF for disassembly
Alpha beta SNAP	Söllner et al., 1993b, Cell	10.1016/0092-8674(93)90376-2	8221884	Bring SNARE complex to NSF for disassembly
Alpha beta SNAP	Weidman et al., 1989, J. Cell. Biol.	10.1083/jcb.108.5.1589	2541136	Bring SNARE complex to NSF for disassembly
Alpha beta SNAP	Whiteheart et al., 1993, Nature	10.1038/362353a0	8455721	Thre isoforms: alpha, beta, gamma
Alpha beta SNAP	Wilson et al., 1989, Nature	10.1038/339355a0	2657434	Bring SNARE complex to NSF for disassembly
Alpha-internexin	Suzuki et al., 1997, Brain Res.	10.1016/S0006-8993(97)00492-7	9310396		In PSD
Alpha-internexin	Suzuki et al., 2018, J. Neurochem.	10.1111/jnc.14254	29134655		Forms lattice with tubulin
Alpha-internexin	Yuan et al., 2006, J. Neurosci.	10.1523/JNEUROSCI.2580-06.2006	17005864	Part of neurofilaments
Alpha-internexin	Yuan et al., 2015a, Mol. Psychiatry	10.1038/mp.2015.45	25869803		Postsynaptic localization
Alpha-internexin	Yuan et al., 2015b, Mol. Psychiatry	10.1038/mp.2015.99	26201270		Postsynaptic localization
AP180	Ahle and Ungewickell, 1986, EMBO J.	10.1002/j.1460-2075.1986.tb04621.x	3816757			Clathrin
AP180	Burbea et al., 2002, Neuron	10.1016/S0896-6273(02)00749-3	12123612	Involved in endocytosis of ubiquitinated AMPAR in c.elegans
AP180	Hering et al., 2003, J. Neurosci.	10.1523/JNEUROSCI.23-08-03262.2003	12716933			Pi(4,5)P2
AP180	Keen, 1987, J. Cell. Biol.	10.1083/jcb.105.5.1989	2890644			Clathrin
AP180	Lindner and Ungewickell, 1992, J. Biol. Chem.	na	1644836	Initiation of Clathrin cage formation
AP180	Murphy et al., 1991, J. Biol. Chem.	na	1999423			Clathrin
AP180	Norris et al., 1995, J. Biol. Chem.	10.1074/jbc.270.1.214	7814377	Initiation of Clathrin cage formation
AP180	Sousa et al., 1992, J. Neurosci.	10.1523/JNEUROSCI.12-06-02130.1992	1607932			Clathrin
AP180	Ye and Lafer, 1995, J. Biol. Chem.	10.1074/jbc.270.18.10933	7738035	Initiation of Clathrin cage formation
AP180	Zhou et al., 1992, J. Neurosci.	10.1523/JNEUROSCI.12-06-02144.1992	1607933			Clathrin
APP	Müller and Zheng, 2012, Cold Spring Harb. Perspect. Med.	10.1101/cshperspect.a006288	22355794	Precursor of Abeta, which is a hallmark of AD
APP	Perez et al., 1997, J. Neurosci.	10.1523/JNEUROSCI.17-24-09407.1997	9390996	Involved in neurite outgrowth
APP	Simons et al., 1996, J. Neurosci.	10.1523/JNEUROSCI.16-03-00899.1996	8558258		Secreted and in PM
APP	Slunt et al., 1994, J. Biol. Chem.	na	8300594		Transmembrane protein
APP	Taylor et al., 2008, Neurobiol. Dis.	10.1016/j.nbd.2008.04.011	18585048	Regulates LTP
APP	Young-Pearse et al., 2008, Neural Dev.	10.1186/1749-8104-3-15	18573216	Involved in neurite outgrowth
Arc	Beique et al., 2011, Proc. Natl. Acad. Sci. U S A	10.1073/pnas.1017914108	21187403	Involved in homeostatic plasticity
Arc	Chowdury et al., 2006, Neuron	10.1016/j.neuron.2006.08.033	17088211	Mediates mGluR dependent LTD through AMPAR endocytosis		Dynamin2
Arc	Guzowski et al., 2000, J. Neurosci.	10.1523/jneurosci.20-11-03993.2000	10818134	Involved in LTP
Arc	Korb and Finkbeiner, 2011, Trends in Neurosci.	10.1016/j.tins.2011.08.007	21963089		mRNA transported to activated synapses
Arc	Korb et al., 2013, Nat. Neurosci.	10.1038/nn.3429	23749147		Nuclear levels are modulated by synaptic activitiy
Arc	Messaoudi et al., 2007, J. Neurosci.	10.1523/JNEUROSCI.2883-07.2007	17898216	Involved in LTP, regulates actin polymerization
Arc	Nair et al., 2017, Front. Synaptic Neurosci.	10.3389/fnsyn.2017.00008	28553222	serves as an inverse synaptic tag		CaMKIIbeta, Drebrin1, PSD95
Arc	Nielsen et al., 2019, Structure	10.1016/j.str.2019.04.001	31080121	Homooligomerization blocked by NMDAR interaction		GluN2A, GluN2B
Arc	Peebles et al., 2010, Proc. Natl. Acad. Sci. U S A	10.1073/pnas.1006546107	20921410	reduces AMPAR surface density
Arc	Plath et al., 2006, Neuron	10.1016/j.neuron.2006.08.024	17088210	Involved in LTP, but only long-term forms, short term are unaffected
Arc	Shepherd & Bear, 2011, Nat. Neursci.	10.1038/nn.2708	21278731		mRNA transported to activated synapses
Arc	Wu et al., 2017, Cell	10.1016/j.cell.2011.09.036	22036569	Regulates APP trafficking
Arc	Zhang et al., 2019, Mol. Cell	10.1016/j.molcel.2019.05.004	31151856	CaMKII prevents oligomerization
BDNF	Adachi et al., 2005, BMC Neurosci.	10.1186/1471-2202-6-42	15969745		In secretory granules in postsynapse
BDNF	Hartmann et al., 2001, EMBO J.	10.1093/emboj/20.21.5887	11689429	Secreted from postsynapse upon Calcium influx	In secretory granules in postsynapse
BDNF	Kohara et al., 2001, Science	10.1126/science.1057415	11264540		In secretory granules in postsynapse
BDNF	Korte et al., 1995, Proc. Natl. Acad. Sci. U S A	10.1073/pnas.92.19.8856	7568031	Involved in LTP
BDNF	Leal et al., 2015, Brain Res.	10.1016/j.brainres.2014.10.019	25451089	gets recognized by LNGFR
BDNF	Minichiello et al., 2002, Neuron	10.1016/S0896-6273(02)00942-X	12367511	Major regulater of LTP in hippocampus and other brain regions
BDNF	Patterson et al., 1996, Neuron	10.1016/S0896-6273(00)80140-3	8663990	Involved in LTP
BDNF	Soppet et al., 1991, Cell	10.1016/0092-8674(91)90396-G	1645620	bound by TrkB
beta-2-spectrin	Bär et al., 2016, Sci. Rep.	10.1038/srep37136	27841352			actin
beta-2-spectrin	Sidenstein et al., 2016, Sci. Rep.	10.1038/srep26725	27220554			actin
beta-2-spectrin	Xu et al., 2013, Science	10.1126/science.1232251	23239625	intersperses actin rings		actin
beta-3-tubulin	Jaworski et al., 2009, Neuron	10.1016/j.neuron.2008.11.013	19146815		Some dynamic MT enter the spine heads
beta-3-tubulin	Kaech et al., 2001, Proc. Natl. Acad. Sci. U S A	10.1073/pnas.111146798	11416192		Mostly as stable bundles in dendrites
beta-3-tubulin	Landis and Reese, 1983, J. Cell. Biol.	10.1083/jcb.97.4.1169	6684661		Mostly as stable bundles in dendrites
beta-3-tubulin	Sullivan and Cleveland, 1986, Proc. Natl. Acad. Sci. U S A	10.1073/pnas.83.12.4327	3459176		Specific for brain and testis
beta-tubulin	Jaworski et al., 2009, Neuron	10.1016/j.neuron.2008.11.013	19146815		Some dynamic MT enter the spine heads
beta-tubulin	Kaech et al., 2001, Proc. Natl. Acad. Sci. U S A	10.1073/pnas.111146798	11416192		Mostly as stable bundles in dendrites
beta-tubulin	Landis and Reese, 1983, J. Cell. Biol.	10.1083/jcb.97.4.1169	6684661		Mostly as stable bundles in dendrites
CalbindinD28K	Berggard et al., 2002, J. Biol. Chem.	10.1074/jbc.M200415200	11872749	Binds 4 Ca2+ ions with Kd of 286-1790 nM (average 400 nM)
CalbindinD28K	Veenstra et al., 1997, Biochemistry	10.1021/bi9628329	9132004	Binds 4 Ca2+ ions with Kd of 286-1790 nM (average 400 nM)
CalbindinD28K	Villa et al., 1994, Eur. J. Neurosci.	10.1111/j.1460-9568.1994.tb01010.x	8000572	Decerases during aging	CA3 pyramidal cells are negative, CA1 pyramidal cells are positive. Granule cells in DT are positive, but these are interneurons!
Calcineurin	Coghlan et al., 1995, Science	10.1126/science.7528941	7528941		PSD	AKAP proteins link it to PSD93 and PSD95
Calcineurin	Dawson et al., 1993, Proc. Natl. Acad. Sci. U S A	10.1073/pnas.90.21.9808	7694293	Activates nNOS		nNOS
Calcineurin	Day et al., 2002, J. Neurosci.	10.1152/jn.00843.2001	11976386	Regulates calcium channel currents (both directions)
Calcineurin	Fraser & Scott, 1999, Neuron	10.1016/S0896-6273(00)80795-3	10433254		PSD	AKAP proteins link it to PSD93 and PSD95
Calcineurin	Goto et al., 1985, J. Neurochem.	10.1111/j.1471-4159.1985.tb05504.x	2987415	Dephosphorylates tubulin, which increases its ability to assemble into MT and affinity to MAP2 and tau		Tubulins
Calcineurin	Groth et al., 2003, Biochem. Biophys. Res. Comm.	10.1016/j.bbrc.2003.09.002	14623302	Phosphatase with narrow substrate specificity. Activated by Calcium and calmodulin.
Calcineurin	Halpain et al., 1998, J. Neurosci.	10.1523/jneurosci.18-23-09835.1998	9822742	Destabilizes F-actin in dendritic spines	PSD
Calcineurin	Hernandez-Lopez et al., 2000, J. Neurosci.	10.1523/jneurosci.20-24-08987.2000	11124974	Regulates calcium channel currents (both directions)
Calcineurin	Liebermann et al., 1994, Nature	10.1038/369235a0	7514273	Reduces NMDAR activity
Calcineurin	Liu et al., 1994, Science	10.1126/science.8052858	8052858	Activates CME through dephosphorylation of Dynamin1		Dynamin1
Calcineurin	Mandelkow et al., 1995, Neurobiol.	10.1016/0197-4580(95)00025-a	7566345	Dephosphorylates tubulin, which increases its ability to assemble into MT and affinity to MAP2 and tau		Tubulins
Calcineurin	Mulkey et al., 1994, Nature	10.1038/369486a0	7515479	Involved in LTD
Calcineurin	Norris et al., 2002, Neuroscience	10.1016/s0306-4522(01)00574-7	11958864	Regulates calcium channel currents (both directions)
Calcineurin	Tong et al., 1995, Science	10.1126/science.7878472	7878472	Reduces NMDAR activity
Calcineurin	Traynelis et al., 1997, J. Physiol.	10.1111/j.1469-7793.1997.513bg.x	9379408	Dephosphorylates AMPAR through its effect on PP1
Calcineurin	Zeng et al., 2001, Cell	10.1016/S0092-8674(01)00585-2	11733061	Involved in LTD
Calmodulin	Bartos et al., 2010, J. Neurosci.	10.1523/JNEUROSCI.4992-08.2010	20071509			PSD95
Calmodulin	Baudier et al., 1991, J. Biol. Chem.	na	1824695		In ca-unbound form it interacts with Neurogranin, which is at the PM in the postsynapse
Calmodulin	Chowdhury et al., 2017, EMBO J.	10.15252/embj.201695829	29118000	Binding to PSD95 is important for homeostatic downscaling
Calmodulin	Fukunaga et al., 2005, J. Biochem	10.1093/jb/mvi107	16091592			PSD95
Calmodulin	Olwin et al., 1984, Adv. Cyclic. Nucleotide Protein Phosphorylation Res.	na	6326526	4 Calcium binding sites with Kd of 15 mM, which is much lower than many other calcium binding proteins
Calmodulin	Prichard et al., 1999, J. Biol. Chem.	10.1074/jbc.274.12.7689	10075657		In ca-unbound form it interacts with Neurogranin, which is at the PM in the postsynapse
Calmodulin	Xia and Storm, 2005, Nat. Rev. Neurosci.	10.1038/nrn1647	15803158	Master regulator, with more than 100 target proteins		Calcineurin, nNOS, Calcium channels, CaMKII
Calmodulin	Zhang et al., 2014, EMBO J.	10.1002/embj.201488126	24705785			PSD95
Calreticulin	Bedard et al., 2005, Int. Rev. Cytol.	10.1016/S0074-7696(05)45004-4	16125546	Chaperones glycoproteins in ER	ER
Calreticulin	Hebert and Molinari, 2007, Physiol Rev.	10.1152/physrev.00050.2006	17928587	Chaperones glycoproteins in ER	ER
Calreticulin	Nakamura et al., 2001, J. Cell. Biol.	10.1083/jcb.200102073	11524434	Over 50%of Ca2+ stored in the ER lumen is bound to calreticulin. Calreticulin has two binding regions: low affinity that 25 mol of Ca2+ per mol of protein (Kd=2mM) and high affinity: 1 mol per mol or protein (Kd=10µM)	ER
Calretinin	Christel et al., 2012, J. Biol. Chem.	10.1074/jbc.M112.406363	23033479			Cav2.1
Calretinin	Dargan et al., 2004, J. Physiol.	10.1113/jphysiol.2003.059204	14755000	Under Basal calcium levels of 50-100 nM, Calretinin behaves like a slow buffer (EDTA); under high Ca levels of 1µM it acts like a fast buffer (BAPTA)
Calretinin	Molgaard et al., 2014, F1000Res.	10.12688/f1000research.5349.2	25469233	Also in excitatory neurons
CaMKII	Barria et al., 1997, Science	10.1126/science.276.5321.2042	9197267			Phosphorylates AMPAR
CaMKII	Braun and Schulman, 1995, Annu. Rev. Physiol.	10.1146/annurev.ph.57.030195.002221	7778873			Calmodulin
CaMKII	Chao et al., 2011, Cell	10.1016/j.cell.2011.07.038	21884935			Dodecamer
CaMKII	Colbran and Brown, 2004, Curr. Opin. Neurobiol.	10.1016/j.conb.2004.05.008	15194112			Dodecamer
CaMKII	Fink et al., 2003, Neuron	10.1016/S0896-6273(03)00428-8	12873385			F-actin
CaMKII	Gardoni et al., 2006, Eur. J. Neurosci.	10.1111/j.1460-9568.2006.05140.x	17156196	Phosphorylates PSD95
CaMKII	Halt et al., 2012, EMBO J.	10.1038/emboj.2011.482	22234183			GluN2B
CaMKII	Hell, 2014, Neuron	10.1016/j.neuron.2013.12.024	24462093	Central kinase of LTP
CaMKII	Jiang et al., 2008,, Proc. Natl. Acad. Sci. U S A	10.1073/pnas.0710213105	18162541			Cav.21
CaMKII	Matsuzaki et al., 2004, Nature	10.1038/nature02617	15190253	Involved in structural LTP
CaMKII	McGlade-McCulloh et al., 1993, Nature	10.1038/362640a0	8385275	Phosphorylates AMPAR, which influences their trafficking and conductance
CaMKII	Mizutani et al., 2008, J. Neurosci.	10.1523/JNEUROSCI.4738-07.2008	18480293	Phosphorylates Homers
CaMKII	Murakoshi et al., 2011, Nature	10.1038/nature09823	21423166	Activates CDC42, which regulates actin
CaMKII	Shen and Meyer, 1999, Science	10.1126/science.284.5411.162	10102820			F-actin
CaMKII	Zhou et al., 2007, J. Neurosci.	10.1523/JNEUROSCI.4486-07.2007	18077696			GluN2B
CAPS1	Eckenstaler et al., 2016, J. Cell. Sci.	10.1242/jcs.178251	26869227	Calcium sensor for secretory granule release
CAPS1	Farina et al., 2015, Elife	10.7554/eLife.05438	25719439	Also for LDCV release in presynapse	In axons and dendrites
CAPS1	Sadakata et al., 2013, J. Neurosci.	10.1523/JNEUROSCI.2777-13.2013	24174665		In axons and dendrites
Cav1.3	Greer and Greenberg, 2008, Neuron	10.1016/j.neuron.2008.09.002	18817726	Involved in synaptic plastcity, scaling and transriptional regulation
Cav1.3	Ibata et al., 2008, Neuron	10.1016/j.neuron.2008.02.031	18367083	Involved in synaptic plastcity, scaling and transriptional regulation
Cav1.3	Jenkins et al., 2010, J. Neurosci.	10.1523/JNEUROSCI.4367-09.2010	20392935	Regulated by Densin
Cav1.3	Moosmang et al., 2005, J. Neurosci.	10.1523/JNEUROSCI.1531-05.2005	16251435	Involved in synaptic plastcity, scaling and transriptional regulation
Cav1.3	Stanika et al., 2016, Sci. Rep.	10.1038/srep34528	27708393	Controls spine morpholog	On dendritic shaft, neck and head
Cav1.3	Wang et al., 2017, J. Neurosci.	10.1523/JNEUROSCI.2583-16.2017	28363979	Regulated by Densin
Cav1.3	Zhang et al., 2005, J. Neurosci.	10.1523/JNEUROSCI.4554-04.2005	15689539	Regulated by Shank1b through PDZ binding domain
Cav2.1	Jiang et al., 2008,, Proc. Natl. Acad. Sci. U S A	10.1073/pnas.0710213105	18162541			CaMKII
Cav2.1	Magupalli et al., 2013, J. Biol. Chem.	10.1074/jbc.M112.369058	23255606	Involved in LTP
Cav2.1	Nanou et al., 2016, Proc. Natl. Acad. Sci. U S A	10.1073/pnas.1616206113	27799552	Involved in LTP
Cav2.1	Westenbroek et al., 1995, J. Neurosci.	10.1523/JNEUROSCI.15-10-06403.1995	7472404		Main presynaptic VGCC, but also on somatodendritic compartment
Cav2.1	Wu et al., 1999, J. Neurosci.	10.1523/JNEUROSCI.19-02-00726.1999	9880593		Main presynaptic VGCC, but also on somatodendritic compartment
CDC42	Choi et al., 2005, J. Neurosci.	10.1523/JNEUROSCI.3212-04.2005	15673667	Regulates Actin cytoskeleton in spines
CDC42	Murakoshi et al., 2011, Nature	10.1038/nature09823	21423166		In spine heads
CDC42	Shiraishi-Yamaguchi et al., 2009, BMC Neurosci.	10.1186/1471-2202-10-25	19309525			Homer2
Chromogranin A	Krömer et al., 1998, J. Cell. Biol.	10.1083/JCB.140.6.1331	9508767	Aggregate cargo of DCV
Chromogranin A	Montero-Hadjadje et al., 2009, J. Biol. Chem.	10.1074/jbc.M805607200	19179339	Aggregate cargo of DCV
Chromogranin A	Natori and Huttner, 1996, Proc. Natl. Acad. Sci. U S A	10.1073/pnas.93.9.4431	8633084	Aggregate cargo of DCV
Chromogranin A	Sun et al., 2013, Traffic	10.1111/tra.12029	23171199	involved in DCV biogenesis. Aggregate cargo of DCV. Chromogranin A and B are very similar
Chromogranin B	Krömer et al., 1998, J. Cell. Biol.	10.1083/JCB.140.6.1331	9508767	Aggregate cargo of DCV
Chromogranin B	Montero-Hadjadje et al., 2009, J. Biol. Chem.	10.1074/jbc.M805607200	19179339	Aggregate cargo of DCV
Chromogranin B	Natori and Huttner, 1996, Proc. Natl. Acad. Sci. U S A	10.1073/pnas.93.9.4431	8633084	Aggregate cargo of DCV
Chromogranin B	Sun et al., 2013, Traffic	10.1111/tra.12029	23171199	involved in DCV biogenesis. Aggregate cargo of DCV. Chromogranin A and B are very similar
Clathrin HC	Blanpied et al., 2002, Neuron	10.1016/S0896-6273(02)00979-0	12408846		Endocytic zones around PSD
Clathrin HC	Boehm et al., 2006, Neuron	10.1016/j.neuron.2006.06.013	16846856	AMPAR trafficking
Clathrin HC	Cheng et al., 2007, J. Mol. Biol.	10.1016/j.jmb.2006.10.036	17095010			Forms coats
Clathrin HC	Cooney et al., 2002, J. Neurosci.	10.1523/JNEUROSCI.22-06-02215.2002	11896161		Endocytosis on neck or shaft
Clathrin HC	Loebrich et al., 2013, Proc. Natl. Acad. Sci. U S A	10.1073/pnas.1318860110	24191017	Actin is involved in AMPAR endocytosis
Clathrin HC	Lu et al., 2007, Neuron	10.1016/j.neuron.2007.06.041	17880892		Endocytic zones around PSD
Clathrin HC	Musacchio et al., 1999, Mol. Cell.	10.1016/S1097-2765(01)80008-3	10394364			Forms coats
Clathrin HC	Park et al., 2006, Neuron	10.1016/j.neuron.2006.09.040	17145503	AMPAR trafficking
Clathrin HC	Rácz et al., 2004, Nat. Neurosci.	10.1038/nn1303	15322548		Endocytic zones around PSD
Clathrin HC	Rosendale et al., 2017, Cell. Rep.	10.1016/j.celrep.2017.01.081	28228251		Endocytic zones around PSD
Clathrin HC	Tao-Cheng et al., 2011, J. Neurosci.	10.1523/JNEUROSCI.4745-10.2011	21451021		Endocytosis on neck or shaft
Clathrin HC	Ungewickell and Branton, 1981, Nature	10.1038/289420a0	7464911		Triskelia
Clathrin HC	Yudowski et al., 2007, J. Neurosci.	10.1523/JNEUROSCI.2465-07.2007	17928453	AMPAR trafficking
Clathrin LC	Blanpied et al., 2002, Neuron	10.1016/S0896-6273(02)00979-0	12408846		Endocytic zones around PSD
Clathrin LC	Boehm et al., 2006, Neuron	10.1016/j.neuron.2006.06.013	16846856	AMPAR trafficking
Clathrin LC	Cheng et al., 2007, J. Mol. Biol.	10.1016/j.jmb.2006.10.036	17095010			Forms coats
Clathrin LC	Cooney et al., 2002, J. Neurosci.	10.1523/JNEUROSCI.22-06-02215.2002	11896161		Endocytosis on neck or shaft
Clathrin LC	Loebrich et al., 2013, Proc. Natl. Acad. Sci. U S A	10.1073/pnas.1318860110	24191017	Actin is involved in AMPAR endocytosis
Clathrin LC	Lu et al., 2007, Neuron	10.1016/j.neuron.2007.06.041	17880892		Endocytic zones around PSD
Clathrin LC	Musacchio et al., 1999, Mol. Cell.	10.1016/S1097-2765(01)80008-3	10394364			Forms coats
Clathrin LC	Park et al., 2006, Neuron	10.1016/j.neuron.2006.09.040	17145503	AMPAR trafficking
Clathrin LC	Rácz et al., 2004, Nat. Neurosci.	10.1038/nn1303	15322548		Endocytic zones around PSD
Clathrin LC	Rosendale et al., 2017, Cell. Rep.	10.1016/j.celrep.2017.01.081	28228251		Endocytic zones around PSD
Clathrin LC	Tao-Cheng et al., 2011, J. Neurosci.	10.1523/JNEUROSCI.4745-10.2011	21451021		Endocytosis on neck or shaft
Clathrin LC	Ungewickell and Branton, 1981, Nature	10.1038/289420a0	7464911		Triskelia
Clathrin LC	Yudowski et al., 2007, J. Neurosci.	10.1523/JNEUROSCI.2465-07.2007	17928453	AMPAR trafficking
Cortactin	Catarino et al., 2013, J. Cell. Sci.	10.1242/jcs.110742	23038781	Clusters PSD95
Cortactin	Du et al., 1998, Mol. Cell. Biol.	10.1128/MCB.18.10.5838	9742101			Shanks
Cortactin	MacGillavry et al., 2016, Eur. J. Neurosci.	10.1111/ejn.13129	26547831		Very enriched at spines
Cortactin	Naisbitt et al., 1999, Neuron	10.1016/S0896-6273(00)80809-0	10433268			Shanks
Cortactin	Ren et al., 2009, J. Biol. Chem.	10.1074/jbc.M109.000307	19457864	Promotes branching and stabilization of actin
Cortactin	Rostaing et al., 2006, Eur. J. Neurosci.	10.1111/j.1460-9568.2006.05234.x	17229095		At edges of PSD
Cortactin	Wu and Parsons, 1993, J. Cell. Biol.	10.1083/jcb.120.6.1417	7680654			Actin
DLGAP1	Boeckers et al., 1999a, J. Neurosci.	10.1523/JNEUROSCI.19-15-06506.1999	10414979			Shanks
DLGAP1	Kim et al., 1997, J. Cell. Biol.	10.1083/jcb.136.3.669	9024696			PSD95
DLGAP1	MacGillavry et al., 2013, Neuron	10.1016/j.neuron.2013.03.009	23719161		80 nm clusters
DLGAP1	Naisbitt et al., 1999, Neuron	10.1016/S0896-6273(00)80809-0	10433268			Shanks
DLGAP1	Satoh et al., 1997, Genes Cells	10.1046/j.1365-2443.1997.1310329.x	9286858			PSD95
DLGAP1	Takeuchi et al., 1997, J. Biol. Chem.	10.1074/jbc.272.18.11943	9115257			PSD95
DLGAP1	Wu et al., 2000, EMBO J.	10.1093/emboj/19.21.5740	11060025			SAP97
DLGAP1	Yao, 1999, J. Biol. Chem.	10.1074/jbc.274.39.27463	10488079			Shanks
Dopamine D1	Agnati et al., 2016, Rev. Neurosci.	10.1515/revneuro-2015-0024	26418645			Form Homodimers with other dopamine isoforms or GPCRs
Dopamine D1	Beaulieu et al., 2015, Br. J. Pharmacol.	10.1111/bph.12906	25671228			Form Homodimers with other dopamine isoforms or GPCRs
Dopamine D1	Ladepeche et al., 2013a, PLoS One	10.1371/journal.pone.0074512	24040266		DRD1 forms clusters. Predominantly on shaft and on perisynaptic regions.	NMDAR
Dopamine D1	Ladepeche et al., 2013b, Proc. Natl. Acad. Sci. U S A	10.1073/pnas.1310145110	24127604			NMDAR
Dopamine D1	Lee et al., 2002, Cell	10.1016/S0092-8674(02)00962-5	12408866			GluN1 and GluN2A
Dopamine D1	Pei, 2004, J. Neurosci.	10.1523/JNEUROSCI.3922-03.2004	14762133			NMDAR
Dopamine D2	Agnati et al., 2016, Rev. Neurosci.	10.1515/revneuro-2015-0024	26418645			Form Homodimers with other dopamine isoforms or GPCRs
Dopamine D2	Beaulieu et al., 2015, Br. J. Pharmacol.	10.1111/bph.12906	25671228			Form Homodimers with other dopamine isoforms or GPCRs
Dopamine D2	Ladepeche et al., 2013a, PLoS One	10.1371/journal.pone.0074512	24040266		DRD1 forms clusters. Predominantly on shaft and on perisynaptic regions.	NMDAR
Dopamine D2	Ladepeche et al., 2013b, Proc. Natl. Acad. Sci. U S A	10.1073/pnas.1310145110	24127604			NMDAR
Dopamine D2	Liu et al., 2006, Neuron	10.1016/j.neuron.2006.10.011	17145509			GluN2B
Dopamine D2	Pei, 2004, J. Neurosci.	10.1523/JNEUROSCI.3922-03.2004	14762133			NMDAR
Dopamine D2	Sun et al., 2005, J. Neurosci.	10.1523/JNEUROSCI.4603-04.2005	16093384	can decrease GluR1
Drebrin	Hayashi et al., 1996, J. Neurosci.	10.1523/JNEUROSCI.16-22-07161.1996	8929425	Binds actin and stabilizes it
Drebrin	Ishikawa et al., 1994, J. Biol. Chem.	na	7961990	Binds actin and stabilizes it
Drebrin	Merriam et al., 2013, J. Neurosci.	10.1523/JNEUROSCI.0661-13.2013	24133252	Interacts with EB1 to cause MT entry into spines
Drebrin	Mikati et al., 2013, J. Biol. Chem.	10.1074/jbc.M113.472647	23696644	Binds actin and stabilizes it
Dynamin	Carroll et al., 1999, Proc. Natl. Acad. Sci. U S A	10.1073/pnas.96.24.14112	10570207	Endocytosis of glutamate (AMPAR and NMDAR) receptors
Dynamin	Damke et al., 1994, J. Cell. Biol.	10.1083/jcb.127.4.915	7962076	Dynamin2 mediated CME uptake of surface receptors
Dynamin	Faelber et al., 2011, Nature	10.1038/nature10369	21927000			Forms dimers and helices
Dynamin	Gray et al., 2003, Curr. Biol.	10.1016/S0960-9822(03)00136-2	12646135		Dynamin1 is presynaptic, Dynamin2 is ubiquitous, Dynamin3 is member of PSD	mGluR5, Homer
Dynamin	Lu et al., 2007, Neuron	10.1016/j.neuron.2007.06.041	17880892			Homers
Dynamin	Pérez-Otaño et al., 2006, Nat. Neurosci.	10.1038/nn1680	16617342	Endocytosis of glutamate (AMPAR and NMDAR) receptors
Dynamin	Raimondi et al., 2011, Neuron	10.1016/j.neuron.2011.04.031	21689597	Dynamin1 and 3 double KO show more severe phenotypes than single KO, suggesting overlapping roles
Dynamin	Takei et al., 1996, J. Cell. Biol.	10.1083/jcb.133.6.1237	8682861	Dynamin1 involved in SV recycling
ERp72	Lièvremont et al., 1997, J. Biol. Chem.	10.1074/jbc.272.49.30873	9388233	Can bin calcium, but this does not affect ist function, nor does the calcium binding seem to be important in general
ERp72	Mazzarella et al., 1990, J. Biol. Chem.	na	2295602		ER lumen
ERp72	Rupp et al., 1994, J. Biol. Chem.	na	8300576	ER chaperone that isomerizes disufilde bonds
GluK1	Contractor et al., 2011, Trends Neurosci.	10.1016/j.tins.2010.12.002	21256604	Affect likelihoof that postsynaptic ell will fire in response to future stimulation. Involved in excitatory postsynaptic transmission, but also presynaptic kainate receptors in inhibitory transmission
GluK1	Hirbec et al., 2003, Neuron	10.1016/S0896-6273(02)01191-1	12597860			PSD95
GluK1	Schmitz et al., 2001, Science	10.1126/science.1057105	11572960	Increaes presynaptic neurotransmitter release
GluK1	Song and Huganir, 2002, Trends Neurosci	10.1016/S0166-2236(02)02270-1	12392933	Limited role in plasticity
GluN1	Dani et al., 2010, Neuron	10.1016/j.neuron.2010.11.021	21144999
GluN1	Frank et al., 2016, Nat. Commun.	10.1038/ncomms11264	27117477			Part of 1.5 MDa supercomplexes
GluN1	Lee et al., 2002, Cell	10.1016/S0092-8674(02)00962-5	12408866			DRD1
GluN1	MacGillavry et al., 2013, Neuron	10.1016/j.neuron.2013.03.009	23719161		not enriched in PSD
GluN1	Pei, 2004, J. Neurosci.	10.1523/JNEUROSCI.3922-03.2004	14762133			DRD1
GluN1	Perroy et al., 2008, J. Biol. Chem.	10.1074/jbc.M705661200	18182392			mGluR5a
GluN2A	Al-Hallaq et al., 2007, J. Neurosci.	10.1523/JNEUROSCI.2155-07.2007	17670980			MAGUKs
GluN2A	Bard et al., 2010, Proc. Natl. Acad. Sci. U S A	10.1073/pnas.1002690107	20974938			PSD95
GluN2A	Ehlers et al., 1996, Cell	10.1016/S0092-8674(00)81052-1	8625412			Calmodulin
GluN2A	Elias and Nicoll, 2007, Trends Cell. Biol.	10.1016/j.tcb.2007.07.005	17644382			MAGUKs
GluN2A	Frank et al., 2016, Nat. Commun.	10.1038/ncomms11264	27117477			Part of 1.5 MDa supercomplexes
GluN2A	Krapivinsky et al., 2003, Neuron	10.1016/S0896-6273(03)00645-7	14622581			Calmodulin
GluN2A	Lee et al., 2002, Cell	10.1016/S0092-8674(02)00962-5	12408866			DRD1
GluN2A	MacGillavry et al., 2013, Neuron	10.1016/j.neuron.2013.03.009	23719161		not enriched in PSD
GluN2A	Pei, 2004, J. Neurosci.	10.1523/JNEUROSCI.3922-03.2004	14762133			Dopamine receptors
GluN2A	Racca et al., 2000, J. Neurosci.	10.1523/JNEUROSCI.20-07-02512.2000	10729331		NMDAR content of synapses is not very variable and is only weakly correlated with synapse size
GluN2A	Sans et al., 2000, J. Neurosci.	10.1016/j.nlm.2011.01.004.Bidirectional	10648730			MAGUKs, except SAP97
GluN2A	Sheng et al., 1994, Nature	10.1038/368144a0	8139656	Influx of calcium trigger PKC, Src and CaMKII
GluN2A	Shinohara et al., 2008, Proc. Natl. Acad. Sci. U S A	10.1073/pnas.0807461105	19052236		PSD95 bound GluN2A NMDAR are more at center of synapse,
GluN2A	Wyszynski et al., 1997, Nature	10.1038/385439a0	9009191			Calmodulin
GluN2B	Al-Hallaq et al., 2007, J. Neurosci.	10.1523/JNEUROSCI.2155-07.2007	17670980			MAGUKs
GluN2B	Bard et al., 2010, Proc. Natl. Acad. Sci. U S A	10.1073/pnas.1002690107	20974938			PSD95
GluN2B	Dani et al., 2010, Neuron	10.1016/j.neuron.2010.11.021	21144999		enriched in center of PSD. roughly 25 nm axially from center of synaptic cleft
GluN2B	Ehlers et al., 1996, Cell	10.1016/S0092-8674(00)81052-1	8625412			Calmodulin
GluN2B	Elias and Nicoll, 2007, Trends Cell. Biol.	10.1016/j.tcb.2007.07.005	17644382			MAGUKs
GluN2B	Halt et al., 2012, EMBO J.	10.1038/emboj.2011.482	22234183			CaMKII
GluN2B	Krapivinsky et al., 2003, Neuron	10.1016/S0896-6273(03)00645-7	14622581			Calmodulin
GluN2B	Liu et al., 2006, Neuron	10.1016/j.neuron.2006.10.011	17145509			Dopamine D2
GluN2B	MacGillavry et al., 2013, Neuron	10.1016/j.neuron.2013.03.009	23719161		enriched in PSD
GluN2B	Racca et al., 2000, J. Neurosci.	10.1523/JNEUROSCI.20-07-02512.2000	10729331		NMDAR content of synapses is not very variable and is only weakly correlated with synapse size
GluN2B	Sans et al., 2000, J. Neurosci.	10.1016/j.nlm.2011.01.004.Bidirectional	10648730			MAGUKs, except SAP97
GluN2B	Sheng et al., 1994, Nature	10.1038/368144a0	8139656	Influx of calcium trigger PKC, Src and CaMKII
GluN2B	Shinohara et al., 2008, Proc. Natl. Acad. Sci. U S A	10.1073/pnas.0807461105	19052236		PSD95 bound GluN2A NMDAR are more at center of synapse,
GluN2B	Wyszynski et al., 1997, Nature	10.1038/385439a0	9009191			Calmodulin
GluN2B	Zhang and Diamond, 2009, J. Neurosci.	10.1523/JNEUROSCI.5602-08.2009	19339621		SAP102 bound GluN2B NMDAR are more peripheral
GluN2B	Zhou et al., 2007, J. Neurosci.	10.1523/JNEUROSCI.4486-07.2007	18077696			CaMKII
GluR1	MacGillavry et al., 2013, Neuron	10.1016/j.neuron.2013.03.009	23719161		Position close to release site is important for synaptic strength
GluR1	Nair et al., 2013, J. Neurosci.	10.1523/JNEUROSCI.2381-12.2013	23926273		70-80 nm clusters containing ~20 receptors
GluR2	Hirbec et al., 2002, J. Biol. Chem.	10.1074/jbc.C200112200	11891216			Pick1, GRIP
GluR2	Kato et al., 2008, Neuron	10.1016/j.neuron.2008.07.034	18817736			TARP gamma 5, TARP gamma 7
GluR2	Lu and Ziff, 2005, Neuron	10.1016/j.neuron.2005.07.006	16055064			GRIP
GluR2	MacGillavry et al., 2013, Neuron	10.1016/j.neuron.2013.03.009	23719161		enriched in PSD
GluR2	Nair et al., 2013, J. Neurosci.	10.1523/JNEUROSCI.2381-12.2013	23926273		70-80 nm clusters containing ~20 receptors
GluR2	Osten et al., 1998, Neuron	10.1016/S0896-6273(00)80518-8	9697855			NSF, alpha-beta SNAP
GluR3	Hirbec et al., 2002, J. Biol. Chem.	10.1074/jbc.C200112200	11891216			Pick1, GRIP
GluR3	MacGillavry et al., 2013, Neuron	10.1016/j.neuron.2013.03.009	23719161		enriched in PSD
GluR3	Nair et al., 2013, J. Neurosci.	10.1523/JNEUROSCI.2381-12.2013	23926273		70-80 nm clusters containing ~20 receptors
GluR3	Xia et al., 1999, Neuron	10.1016/S0896-6273(00)80689-3	10027300			GRIP
GRIP1/2	Braithwaite et al., 2002, Proc. Natl. Acad. Sci. U S A	10.1073/PNAS.102156099	12011465	Controls trafficking of AMPAR
GRIP1/2	Dong et al., 1997, Nature	10.1038/386279a0	9069286	Controls trafficking of AMPAR
GRIP1/2	Dong et al., 1999, Ann. N Y Acad. Sci.	10.1111/j.1749-6632.1999.tb11323.x	10414331	Controls trafficking of AMPAR
GRIP1/2	Hanley and Henley, 2010, Neurosci. Lett.	10.1016/J.NEULET.2010.09.003	20837103	Controls trafficking of AMPAR
Homer1	Dani et al., 2010, Neuron	10.1016/j.neuron.2010.11.021	21144999		Lateral: 65-90 nm from centerl of synaptic cleft -> 50-75 nm from PSD membrane
Homer1	Hayashi et al., 2006, J. Neurosci.	10.1523/JNEUROSCI.2731-06.2006	16914674		Dimer of dimers (disproven by Hayashi 2009)	Multidimensional lattice with Shanks
Homer1	Hayashi et al., 2009, Cell	10.1016/j.cell.2009.01.050	19345194		Tail to tail interaction 2 dimers	Mesh like structure with Shanks
Homer1	Kato et al., 1998, J. Biol. Chem.	10.1074/jbc.273.37.23969	9727012			mGluRs
Homer1	Lu et al., 2007, Neuron	10.1016/j.neuron.2007.06.041	17880892			Dynamin3
Homer1	MacGillavry et al., 2013, Neuron	10.1016/j.neuron.2013.03.009	23719161		80 nm clusters
Homer1	Newpher and Ehlers, 2008, Neuron	10.1016/j.neuron.2008.04.030	18498731			Dynamin3
Homer1	Roche et al., 1999, J. Biol. Chem.	10.1074/jbc.274.36.25953	10464340			mGluRs
Homer1	Tao-Cheng et al., 2014, Neuroscience	10.1016/j.neuroscience.2014.01.066	24530450		Axial 30-100 nm below PSD membrane (PSD core is ~30 nm thick). Lateral: within PSD, not at perisynaptic . Short isoforms dispersed in cytoplasm, long isoforms at PSDsites (area 60 nm next to PSD edge)
Homer1	Tu et al., 1998, Neuron	10.1016/S0896-6273(00)80589-9	9808459			mGluRs, Shanks
Homer1	Xiao et al., 1998, Neuron	10.1016/S0896-6273(00)80588-7	9808458			mGluRs
Homer2	Dani et al., 2010, Neuron	10.1016/j.neuron.2010.11.021	21144999		Lateral: 65-90 nm from centerl of synaptic cleft -> 50-75 nm from PSD membrane
Homer2	Hayashi et al., 2006, J. Neurosci.	10.1523/JNEUROSCI.2731-06.2006	16914674		Dimer of dimers (disproven by Hayashi 2009)	Multidimensional lattice with Shanks
Homer2	Hayashi et al., 2009, Cell	10.1016/j.cell.2009.01.050	19345194		Tail to tail interaction 2 dimers	Mesh like structure with Shanks
Homer2	Kato et al., 1998, J. Biol. Chem.	10.1074/jbc.273.37.23969	9727012			mGluRs
Homer2	Lu et al., 2007, Neuron	10.1016/j.neuron.2007.06.041	17880892			Dynamin3
Homer2	MacGillavry et al., 2013, Neuron	10.1016/j.neuron.2013.03.009	23719161		80 nm clusters
Homer2	Newpher and Ehlers, 2008, Neuron	10.1016/j.neuron.2008.04.030	18498731			Dynamin3
Homer2	Roche et al., 1999, J. Biol. Chem.	10.1074/jbc.274.36.25953	10464340			mGluRs
Homer2	Tao-Cheng et al., 2014, Neuroscience	10.1016/j.neuroscience.2014.01.066	24530450		Axial 30-100 nm below PSD membrane (PSD core is ~30 nm thick). Lateral: within PSD, not at perisynaptic . Short isoforms dispersed in cytoplasm, long isoforms at PSDsites (area 60 nm next to PSD edge)
Homer2	Tu et al., 1998, Neuron	10.1016/S0896-6273(00)80589-9	9808459			mGluRs, Shanks
Homer2	Xiao et al., 1998, Neuron	10.1016/S0896-6273(00)80588-7	9808458			mGluRs
Homer3	Dani et al., 2010, Neuron	10.1016/j.neuron.2010.11.021	21144999		Lateral: 65-90 nm from centerl of synaptic cleft -> 50-75 nm from PSD membrane
Homer3	Hayashi et al., 2006, J. Neurosci.	10.1523/JNEUROSCI.2731-06.2006	16914674		Dimer of dimers (disproven by Hayashi 2009)	Multidimensional lattice with Shanks
Homer3	Hayashi et al., 2009, Cell	10.1016/j.cell.2009.01.050	19345194		Tail to tail interaction 2 dimers	Mesh like structure with Shanks
Homer3	Kato et al., 1998, J. Biol. Chem.	10.1074/jbc.273.37.23969	9727012			mGluRs
Homer3	Lu et al., 2007, Neuron	10.1016/j.neuron.2007.06.041	17880892			Dynamin3
Homer3	MacGillavry et al., 2013, Neuron	10.1016/j.neuron.2013.03.009	23719161		80 nm clusters
Homer3	Newpher and Ehlers, 2008, Neuron	10.1016/j.neuron.2008.04.030	18498731			Dynamin3
Homer3	Roche et al., 1999, J. Biol. Chem.	10.1074/jbc.274.36.25953	10464340			mGluRs
Homer3	Tao-Cheng et al., 2014, Neuroscience	10.1016/j.neuroscience.2014.01.066	24530450		Axial 30-100 nm below PSD membrane (PSD core is ~30 nm thick). Lateral: within PSD, not at perisynaptic . Short isoforms dispersed in cytoplasm, long isoforms at PSDsites (area 60 nm next to PSD edge)
Homer3	Tu et al., 1998, Neuron	10.1016/S0896-6273(00)80589-9	9808459			mGluRs, Shanks
Homer3	Xiao et al., 1998, Neuron	10.1016/S0896-6273(00)80588-7	9808458			mGluRs
HSC70	Eisenberg and Greene, 2007, Traffic	10.1111/j.1600-0854.2007.00568.x	17488288	Clathrin coat disassembly
HSC70	Grove et al., 2011, Mol. Biol. Cell.	10.1091/mbc.E10-09-0760	21148293	Chaperone in ERAD pathway
HSC70	Huang et al., 1993, J Biol Chem.	na	8420978	Chaperone in ERAD pathway
HSC70	Rothnie et al., 2011, Proc. Natl. Acad. Sci. U S A	10.1073/pnas.1018845108	21482805	Clathrin coat disassembly
HSC70	Schlossman et al., 1984, J. Cell. Biol.	10.1083/jcb.99.2.723	6146630	Clathrin coat disassembly
HSC70	Ungewickell et al., 1997, J. Biol. Chem.	10.1074/JBC.272.31.19594	9235966	Clathrin coat disassembly
HSC70	Yamamoto et al., 2010, Cell Struct. Funct.	10.1247/csf.10023	21150129	Chaperone in ERAD pathway	Can be recruited to ER
IGF1R	D’Ercole et al., 1996, Mol. Neurobiol.	10.1007/BF02740625	8989772	KO leads to reduced brain size, Overexpression to brain overgrowth
IGF1R	Gazit et al., 2016, Neuron	10.1016/j.neuron.2015.12.034	26804996	Maintain evoked release probability, supress spontaneous SV release in hippocampus, Regulate Mitochondrion	~75% presynaptic, but rest is postsynaptic
IGF1R	Kenyon, 2010, Ann. N Y Acad. Sci.	10.1111/j.1749-6632.2010.05640.x	20738286	Reduction in signalling leads to extension of lifespan in many species, including human
IGF1R	Lemmon and Schlessinger, 2010, Cell	10.1016/j.cell.2010.06.011	20602996			Homodimers
IGF1R	Ramsey et al., 2005, J. Neurophysiol.	10.1152/jn.00768.2004	15985695	Potentiates excitatory transmission postsynaptic mechanisms (but also through presynaptic mechanisms)
IGF1R	Suh et al., 2008, Proc. Natl. Acad. Sci. U S A	10.1073/pnas.0705467105	18316725	Reduction in signalling leads to extension of lifespan in many species, including human
Kir2.1	Fomina et al., 2011, Biochim. Biophys. Acta.	10.1016/j.bbamem.2011.06.021	21756874			PSD95
Kir2.1	Frank et al., 2016, Nat. Commun.	10.1038/ncomms11264	27117477			Part of 1.5 MDa supercomplexes
Kir2.1	Vikstrom et al., 2009, Am. J. Physiol. Heart Circ. Physiol.	10.1152/ajpheart.00638.2008	19633205			SAP97
Kv1.1	Kim et al., 1995, Nature	10.1038/378085a0	7477295			PSD95
Kv1.1	Tiffany et al., 2000, J. Cell. Biol.	10.1083/jcb.148.1.147	10629225			PSD95
Kv2.1	Du et al., 2000, J Physiol.	10.1111/j.1469-7793.2000.t01-2-00019.xm	10618149	Single channels: regulate high frequency firing
Kv2.1	Feinshreiber et al., 2009, Ann. N Y Acad. Sci.	10.1111/j.1749-6632.2008.03997.x	19161379			Syntaxin1
Kv2.1	Fox et al., 2013, J. Neurosci.	10.1523/JNEUROSCI.3008-12.2013	23325261	Clustered channels: Non conducting, but contribute to excitation-gene transcription coupling
Kv2.1	Lai and Jan, 2006, Nat. Rev. Neurosci.	10.1038/nrn1938	16791144	Forms clusters of 1-2 µm on soma and proximal dendrites
Kv2.1	Leung et al., 2007, Endocr. Rev.	10.1210/er.2007-0010	17878408			Syntaxin1
Kv2.1	Misonou et al., 2005, Neurotoxicology	10.1016/j.neuro.2005.02.003	15950285	Single channels: regulate high frequency firing
Kv2.1	Murakoshi and Trimmer, 1999, J. Neurosci.	10.1523/JNEUROSCI.19-05-01728.1999	10024359	Dominant delayed rectifyer potassium channel in hippocampus
Kv2.1	O’Connell et al., 2010, Proc. Natl. Acad. Sci. U S A	10.1073/pnas.1003028107	20566856	Clustered channels: Non conducting, but contribute to excitation-gene transcription coupling
Kv2.1	Scannevin et al., 1996, J. Cell. Biol.	10.1083/jcb.135.6.1619	8978827	Forms clusters of 1-2 µm on soma and proximal dendrites
Kv2.1	Trimmer, 1991, Proc. Natl. Acad. Sci. U S A	10.1073/PNAS.88.23.10764	1961744	Forms clusters of 1-2 µm on soma and proximal dendrites
LNGFR	Barker, 1998, Cell Death Differ.	10.1038/sj.cdd.4400375	10200483	Binds neurotrophins with low affinity, whereas Trk receptors bind them with high affinity
LNGFR	Ernfors et al., 1990, Proc. Natl. Acad. Sci. U S A	10.1073/pnas.87.14.5454	2164684	Binds neurotrophins with low affinity, whereas Trk receptors bind them with high affinity
LNGFR	Leal et al., 2015, Brain Res.	10.1016/j.brainres.2014.10.019	25451089	Recognizes all 4 neurotrophins
LNGFR	Rodriguez-Tébar et al., 1990, Neuron	10.1016/0896-6273(90)90107-Q	2157470	Binds neurotrophins with low affinity, whereas Trk receptors bind them with high affinity
LNGFR	Yang et al., 2009, Na. Neurosci.	10.1038/nn.2244	19136973	Involved in LTD
LNGFR	Yang et al., 2014, Cell Rep.	10.1016/j.celrep.2014.03.040	24746813	Involved in LTD
mAChR1	Egorov et al., 2002, Nature	10.1038/nature01171	12432392	Slow EPSP
mAChR1	Hersch et al., 1994, J. Neurosci.	10.1523/JNEUROSCI.14-05-03351.1994	8182478		Enriched at spine dendrites and at PSDs in Striatum
mAChR1	Smith and Araneda, 2010, J. Neurophysiol.	10.1152/jn.00446.2010	20861438	Slow EPSP
mAChR1	Uchimura and North, 1990, J. Physiol.	10.1113/jphysiol.1990.sp017989	1693682	Decreased potassium conductance
MAP2	Farah and Leclerc, 2008, Cell Motil. Cytoskeleton.	10.1002/cm.20284	18473367	Stabilizes MT by crosslinking adjacent microtubules
MAP2	Frappier et al., 1991, Biochem. J.	10.1042/bj2750521	1902666	Crosslinks MT with NF
MAP2	Hirokawa et al., 1996, J. Cell. Biol.	10.1083/jcb.132.4.667	8647897	Crosslinks MT with NF
mGluR1	Feng et al., 2002, J. Biol. Chem.	10.1074/jbc.M207675200	12223488	Control release of Ca2+ from intracellular stores
mGluR1	Hu et al., 2010, Neuron	10.1016/j.neuron.2010.11.008	21172614	Homeostatic scaling is dependent on group1 mGluRs, mediated by Homer1
mGluR1	Kato et al., 2008, Neuron	10.1016/j.neuron.2008.07.034	18817736			Homers
mGluR1	Kitano et al., 2003, J. Biol. Chem.	10.1074/jbc.M303266200	12704197	Modulate VSCC
mGluR1	Maejima et al., 2001, Neuron	10.1016/S0896-6273(01)00375-0	11516402	Activate endogenous Cannabinoid synthesis
mGluR1	Mansouri et al., 2015, Eur. J. Neurosci.	10.1111/ejn.12779	25377770		Perisynaptic localization of mGluR1
mGluR1	Pandya et al., 2016, Proteomics	10.1002/pmic.201500400	27392515			This can be either mGluR1a with mGluR1b or mGluR1 with mGluR5
mGluR1	Park et al., 2008, Neuron	10.1016/j.neuron.2008.05.023	18614030	Activate ERK and PI3K signalling
mGluR1	Roche et al., 1999, J. Biol. Chem.	10.1074/jbc.274.36.25953	10464340			Homers
mGluR1	Skeberdis et al., 2001, Neuropharmacology	10.1016/S0028-3908(01)00005-3	11378156	Activate NMDAR
mGluR1	Techlovská et al., 2014, Neuropharmacology	10.1016/j.neuropharm.2014.08.011	25158311		In the perisynaptic regions of spines.	Need to form dimeric complexes to be active. This can be either mGluR1a with mGluR1b or mGluR1 with mGluR5
mGluR1	Tu et al., 1998, Neuron	10.1016/S0896-6273(00)80589-9	9808459			Homers
mGluR1	Xiao et al., 1998, Neuron	10.1016/S0896-6273(00)80588-7	9808458			Homers
mGluR1	Yuan et al., 2003, Cell	10.1016/S0092-8674(03)00716-5	14505576	Control release of Ca2+ from intracellular stores. Regulate influce of Ca2+ through TRPC channels
mGluR2	Ambrosini et al., 1995, Mol. Pharmacol.	na	7746273	Inhibit PLC etc, -> decrease NMDAR activity
mGluR2	Cai et al., 2001, J Neurochem.	10.1046/j.1471-4159.2001.00468.x	11520896			PKA
mGluR2	Hirbec et al., 2002, J. Biol. Chem.	10.1074/jbc.C200112200	11891216			Pick1, GRIP
mGluR2	Jin et al., 2017, Mol. Psychiatry.	10.1038/mp.2016.129	27502475		Postsynaptic, but also presynaptic (Shigemoto 1997) also probably from the postsynaptic interaction partners mentioned above, PICK1 and GRIP,
mGluR2	Kato et al., 2008, Neuron	10.1016/j.neuron.2008.07.034	18817736			Homers
mGluR2	Roche et al., 1999, J. Biol. Chem.	10.1074/jbc.274.36.25953	10464340			Homers
mGluR2	Schaffhauser et al., 2000, J. Neurosci.	10.1523/JNEUROSCI.20-15-05663.2000	10908604			PKA
mGluR2	Tu et al., 1998, Neuron	10.1016/S0896-6273(00)80589-9	9808459			Homers
mGluR2	Xiao et al., 1998, Neuron	10.1016/S0896-6273(00)80588-7	9808458			Homers
mGluR5	Feng et al., 2002, J. Biol. Chem.	10.1074/jbc.M207675200	12223488	Control release of Ca2+ from intracellular stores
mGluR5	Hu et al., 2010, Neuron	10.1016/j.neuron.2010.11.008	21172614	Homeostatic scaling is dependent on group1 mGluRs, mediated by Homer1
mGluR5	Kato et al., 1998, J. Biol. Chem.	10.1074/jbc.273.37.23969	9727012			Homers
mGluR5	Kitano et al., 2003, J. Biol. Chem.	10.1074/jbc.M303266200	12704197	Modulate VSCC
mGluR5	Maejima et al., 2001, Neuron	10.1016/S0896-6273(01)00375-0	11516402	Activate endogenous Cannabinoid synthesis
mGluR5	Mansouri et al., 2015, Eur. J. Neurosci.	10.1111/ejn.12779	25377770		Perisynaptic localization of mGluR1
mGluR5	Pandya et al., 2016, Proteomics	10.1002/pmic.201500400	27392515			This can be either mGluR1a with mGluR1b or mGluR1 with mGluR5
mGluR5	Pandya et al., 2016, Proteomics	10.1002/pmic.201500400	27392515			mGluR1
mGluR5	Park et al., 2008, Neuron	10.1016/j.neuron.2008.05.023	18614030	Activate ERK and PI3K signalling
mGluR5	Roche et al., 1999, J. Biol. Chem.	10.1074/jbc.274.36.25953	10464340			Homers
mGluR5	Skeberdis et al., 2001, Neuropharmacology	10.1016/S0028-3908(01)00005-3	11378156	Activate NMDAR
mGluR5	Techlovská et al., 2014, Neuropharmacology	10.1016/j.neuropharm.2014.08.011	25158311		In the perisynaptic regions of spines.	Need to form dimeric complexes to be active. This can be either mGluR1a with mGluR1b or mGluR1 with mGluR5
mGluR5	Tu et al., 1998, Neuron	10.1016/S0896-6273(00)80589-9	9808459			Homer, Shanks
mGluR5	Xiao et al., 1998, Neuron	10.1016/S0896-6273(00)80588-7	9808458			Homers
mGluR5	Yuan et al., 2003, Cell	10.1016/S0092-8674(03)00716-5	14505576	Control release of Ca2+ from intracellular stores. Regulate influce of Ca2+ through TRPC channels
Myosin5a	Correia et al., 2008, Nat. Neurosci.	10.1038/nn2063	18311135	GluR1 and GluR2 transport during LTP
Myosin5a	Lisé et al., 2006, J. Biol. Chem.	10.1074/jbc.M511725200	16338934	coimmunoprecipitates with Rab11	coimmunoprecipitates with Rab11
Myosin5a	Miyata et al., 2000, Neuron	10.1016/S0896-6273(00)00099-4	11086997	Regulates ER localization
Myosin5a	Rudolf et al., 2011, J. Neurochem.	10.1111/j.1471-4159.2010.07110.x	21077886	Regulates ER localization
Na beta 1	Kazarinova-Noyes et al., 2001, J. Neurosci.	10.1523/JNEUROSCI.21-19-07517.2001	11567041	Also acts as adhesion molecules by binding to spectrin and Cortactin		Nav1.1 to Nav1.7
Na beta 1	Malhotra et al., 2000, J. Biol. Chem.	10.1074/jbc.275.15.11383	10753953	Also acts as adhesion molecules by binding to spectrin and Cortactin		Nav1.1 to Nav1.7
Na+/K+ ATPase	Blom et al., 2011, BMC Neurosci.	10.1186/1471-2202-12-16	21272290		On spine heads, necks and shaft.
Na+/K+ ATPase	Blom et al., 2012, Microsc. Res. Tech.	10.1002/jemt.21046	21809413		On spine heads, necks and shaft.
Na+/K+ ATPase	Blom et al., 2016, Neurophotonics	10.1117/1.NPh.3.4.041803.Downloaded	27175374		On spine heads, necks and shaft.
Na+/K+ ATPase	Skou, 1957, Biochim. Biophys. Acta.	10.1016/0006-3002(57)90343-8	13412736	Pumps three sodium ions out and 2 potassium ions in per ATP.
Nav1.1	Westenbroek et al., 1989, Neuron	10.1016/0896-6273(89)90238-9	2561976		Dominantly on cell body and dendrites
Nav1.3	Westenbroek et al., 1989, Neuron	10.1016/0896-6273(89)90238-9	2561976		Somatodendritic and axon
Nav1.3	Whitaker et al., 2001, Brain Res. Mol. Brain Res.	10.1016/S0169-328X(00)00289-8	11295230		In humans highly expressed in somatodendritic compartments
Neurofilament H	Hirao et al., 2000, Genes Cells	10.1046/j.1365-2443.2000.00318.x	10759891			DLGAP1
Neurofilament H	Rao et al., 2011, PLoS One	10.1371/journal.pone.0017087	21359212			Myosin5a
Neurofilament H	Yuan et al., 2012, J. Cell. Sci.	10.1242/jcs.104729	22956720	Forms triplet with alpha internexin and other proteins
Neurofilament H	Yuan et al., 2015a, Mol. Psychiatry	10.1038/mp.2015.45	25869803		Postsynaptic localization
Neurofilament H	Yuan et al., 2015b, Mol. Psychiatry	10.1038/mp.2015.99	26201270		Postsynaptic localization
Neurofilament L	Hirao et al., 2000, Genes Cells	10.1046/j.1365-2443.2000.00318.x	10759891			DLGAP1
Neurofilament L	Rao et al., 2011, PLoS One	10.1371/journal.pone.0017087	21359212			Myosin5a
Neurofilament L	Yuan et al., 2012, J. Cell. Sci.	10.1242/jcs.104729	22956720	Forms triplet with alpha internexin and other proteins
Neurofilament L	Yuan et al., 2015a, Mol. Psychiatry	10.1038/mp.2015.45	25869803		Postsynaptic localization
Neurofilament L	Yuan et al., 2015b, Mol. Psychiatry	10.1038/mp.2015.99	26201270		Postsynaptic localization
nNOS	Aarts et al., 2002, Science	10.1126/science.1072873	12399596			NMDAR, PSD95
nNOS	Aoki et al., 1997, Brain Res.	10.1016/S0006-8993(96)01147-X	9098526			PSD95
nNOS	Arnold et al., 1977, Proc. Natl. Acad. Sci. U S A	10.1073/pnas.74.8.3203	20623	Activates cyclic GMP production
nNOS	Bon and Garthwaite, 2003, J. Neurosci.	10.1523/JNEUROSCI.23-05-01941.2003	12629199	Retrograde signalling in hippocampus LTP
nNOS	Brenman et al., 1996b, Cell	10.1016/S0092-8674(00)81053-3	8625413			PSD93
nNOS	Calabrese et al., 2007, Nat. Rev. Neurosci.	10.1038/nrn2214	17882254	Activated by calmodulin. Also involved in stress regulation
nNOS	Choi et al., 2000, Nat. Neurosci.	10.1038/71090	10607390	Acts neuroprotective: Inhibits NMDAR Ca2+ influx by S-nitrosylating them
nNOS	Getting et al., 1996, Brain Res.	10.1016/0006-8993(96)00127-8	8738273	Acts neuroprotective: High concentrations of NOS increase GABA release
nNOS	Hopper et al., 2004, Eur. J. Neurosci.	10.1111/j.1460-9568.2004.03306.x	15078541			PSD95
nNOS	Jaffrey et al., 1998, Neuron	10.1016/S0896-6273(00)80439-0	9459447	Acts neuroprotective: Inhibits NMDAR Ca2+ influx by S-nitrosylating them
nNOS	Lonart et al., 1992, Eur. J. Pharmacol.	10.1016/0014-2999(92)90759-W	1425999	Stimulates glutamate release inhippocampus
nNOS	Ohkuma et al., 1996, Brain Res. Mol. Brain Res.	10.1016/0169-328X(95)00256-R	9011749	Acts neuroprotective: High concentrations of NOS increase GABA release
nNOS	Riccio et al., 2006, Mol. Cell.	10.1016/j.molcel.2005.12.006	16427017	Activates Akt
NSF	Block et al., 1988, Proc. Natl. Acad. Sci. U S A	10.1073/PNAS.85.21.7852	3186695	Vesicle fusion
NSF	Clary et al., 1990, Cell	10.1016/0092-8674(90)90482-T	2111733			alpha-beta SNAP
NSF	Evers et al., 2010, Nat. Neurosci.	10.1038/nn.2624	20802490			GluR2
NSF	Hanson et al., 1995, J. Biol. Chem.	10.1074/jbc.270.28.16955	7622514			alpha-beta SNAP
NSF	Hohl et al., 1998, Mol. Cell	10.1016/s1097-2765(00)80153-7	9844627			alpha-beta SNAP
NSF	Söllner et al., 1993a, Nature	10.1038/362318a0	8455717			alpha-beta SNAP
NSF	Söllner et al., 1993b, Cell	10.1016/0092-8674(93)90376-2	8221884			alpha-beta SNAP
NSF	Wilson et al., 1989, Nature	10.1038/339355a0	2657434			alpha-beta SNAP
Parvalbumin	Cates et al., 2002, Biophys. J.	10.1016/S0006-3495(02)75472-6	11867433	Binds calcium and magnesium
Parvalbumin	Klausberger et al., 2005, J. Neurosci.	10.1523/JNEUROSCI.3269-05.2005	16237182		Mostly in inhibitory interneurons
Parvalbumin	Verret et al., 2012, Cell	10.1016/j.cell.2012.02.046	22541439	Involved in Alzheimers disease
PSD93	Brenman et al., 1996a, J. Neurosci.	10.1523/JNEUROSCI.16-23-07407.1996	8922396			nNOS
PSD93	Dakoji et al., 2003, Neuropharmacology	10.1016/S0028-3908(03)00267-3	14529722			TARPs
PSD93	Frank et al., 2016, Nat. Commun.	10.1038/ncomms11264	27117477			Part of 1.5 MDa supercomplexes
PSD93	Leyland and Dart, 2004, J. Biol. Chem.	10.1074/jbc.M407575200	15304517			Kir2.1
PSD93	Niethammer et al., 1996, J. Neurosci.	10.1523/JNEUROSCI.16-07-02157.1996	8601796			GluN2 isoforms
PSD93	Parker, 2004, J. Neurosci.	10.1523/JNEUROSCI.3865-03.2004	14724236			nAChR
PSD95	Bhattacharyya et al., 2009, Na. Neurosci.	10.1038/nn.2249	19169250			Calcineurin
PSD95	Broadhead et al., 2016, Sci. Rep.	10.1038/srep24626	27109929		80 nm nanodomain
PSD95	Dani et al., 2010, Neuron	10.1016/j.neuron.2010.11.021	21144999		30-60 nm deep in tissue
PSD95	Frank et al., 2017, J. Neurochem.	10.1111/jnc.14056	28452394			Part of 1.5 MDa supercomplexes
PSD95	Garner et al., 2000, J. Neurochem.	10.1016/S0962-8924(00)01783-9	10856930			x
PSD95	Hruska et al., 2018, Nat. Neurosci.	10.1038/s41593-018-0138-9	29686261		nanodomain
PSD95	Inagaki et al., 2001, J. Biol. Chem.	10.1074/jbc.M009051200	11134026		Semaphorins
PSD95	Kim et al., 1997, J. Cell. Biol.	10.1083/jcb.136.3.669	9024696			DLGAP1
PSD95	MacGillavry et al., 2013, Neuron	10.1016/j.neuron.2013.03.009	23719161		80 nm clusters
PSD95	Nair et al., 2013, J. Neurosci.	10.1523/JNEUROSCI.2381-12.2013	23926273		150 nm clusters in palmytoylated form
PSD95	Niethammer et al., 1996, J. Neurosci.	10.1523/JNEUROSCI.16-07-02157.1996	8601796			GluN2 isoforms
PSD95	Schultze et al., 2001, J. Neurochem.	10.1046/j.1471-4159.2001.00447.x	11483650		Semaphorins
PSD95	Sheng and Sala, 2001, Annu. Rev. Neurosci.	10.1146/annurev.neuro.24.1.1	11283303	PDZ domains and binding partners
PSD95	Takeuchi et al., 1997, J. Biol. Chem.	10.1074/jbc.272.18.11943	9115257			DLGAP1
PSD95	Tang et al., 2016, Nature	10.1038/nature19058	27462810	Transsynaptic nanocolumn
Rab11	Bacaj et al., 2015a, J. Neurosci.	10.1523/JNEUROSCI.1581-14.2015	25972173	LTD through interaction with Rab11-Fip5
Rab11	Brown et al., 2007, J. Neurosci.	10.1523/JNEUROSCI.4258-07.2007	18045925	AMPAR delivery during LTP
Rab11	Chen et al., 1998, Mol. Biol. Cell.	10.1091/mbc.9.11.3241	9802909	TGN to PM transport
Rab11	Gu et al., 2016, Proc. Natl. Acad. Sci. U S A	10.1073/pnas.1525726113	26839408	Involved in basal GluR2 trafficking from early endosomes and recycling endosomes to PM		Recycling endosome
Rab11	Huang et al., 2013, J. Neurosci.	10.1523/JNEUROSCI.3256-12.2013	23699532	Controls Trkb translocation to PSD during LTP
Rab11	Khvotchev et al., 2003, J. Neurosci.	10.1523/JNEUROSCI.23-33-10531.2003	14627637	SV exocytosis
Rab11	Lazo et al., 2013, J. Neurosci.	10.1523/JNEUROSCI.4630-12.2013	23554492	Controls TrkB trafficking through MyoVb interaction
Rab11	Shirane and Nakayama, 2006, Science	10.1126/science.1134027	17082457	Controls neurite growth through interaction with protrudin
Rab3	Fischer von Mollard et al., 1990, Proc. Natl. Acad. Sci. U S A	10.1073/pnas.87.5.1988	2155429	SV exocytosis	Membrane associated an cytosolic
Rab3	Schlüter et al., 2002, J. Biol. Chem.	10.1074/jbc.M203704200	12167638	Neuroendocrine vesicles
Rab3	von Mollard et al., 1991, Nature	10.1038/349079a0	1845915	SV exocytosis
Rab4	Brown et al., 2007, J. Neurosci.	10.1523/JNEUROSCI.4258-07.2007	18045925	Constitutive AMPAR trafficking to spines
Rab4	de Wit et al., 2001, Mol. Biol. Cell.	10.1091/mbc.12.11.3703	11694600		Early and recycling endosomes and recycling vesicles
Rab4	Gu and Huganir, 2016, Proc. Natl. Acad. Sci. U S A	10.1073/pnas.1614042113	27791016	Involved in GluR2 trafficking from early and recycling endosomes to PM
Rab4	Hoogenraad et al., 2010, PLoS Biol.	10.1371/journal.pbio.1000283	20098723		recycling endosomes
Rab4	Mohrmann et al., 2002, J. Biol. Chem.	10.1074/jbc.M203064200	12036958	Early and recycling endosomes to PM traffic
Rab5	Brown et al., 2005, Neuron	10.1016/J.NEURON.2004.12.023	15629704	Activation by NMDAR triggers AMPAR removal during LTD
Rab5	Bucci et al., 1992, Cell	10.1016/0092-8674(92)90306-W	1516130	Early endosome fusion
Rab5	Deinhardt et al., 2006, Neuron	10.1016/J.NEURON.2006.08.018	17046692		Early endosome
Rab5	Fischer von Mollard et al., 1994, Eur J Cell Biol.	na	7720727	Involved in SV recycling
Rab5	Gu et al., 2016, Proc. Natl. Acad. Sci. U S A	10.1073/pnas.1525726113	26839408	Involved in GluR2 trafficking from early endosomes and recycling endosomes to PM
Rab5	McBride et al., 1999, Cell	10.1016/S0092-8674(00)81966-2	10458612		Early endosome	Interact with Stx13 and EEA1
Rab5	Szíber et al., 2017, Mol. Biol. Cell.	10.1091/mbc.E16-07-0526	27852895	Basal AMPAR trafficking via interaction with RIN1
Rab7	Deinhardt et al., 2006, Neuron	10.1016/J.NEURON.2006.08.018	17046692	Axon retrograde transport
Rab7	Gutierrez et al., 2004, J. Cell. Sci.	10.1242/jcs.01114	15138286	Late endosome to lysosomes	Late endosomes
Rab7	Lee et al., 2013, Mol. Cells.	10.1007/s10059-013-0147-1	23812537	TBC1d15 normale postsynaptic GluR levels
Rab9	Díaz et al., 1997, J. Cell. Biol.	10.1083/jcb.138.2.283	9230071	Regulates late endosome to TGN traffic	TGN
Rab9	Ganley et al., 2004, Mol. Biol. Cell.	10.1091/mbc.e04-08-0747	15456905	Regulates late endosome to TGN traffic	TGN
Rab9	Lombardi et al., 1993, EMBO J.	na	8440258	Regulates late endosome to TGN traffic	TGN
Rapsyn	Bruneau and Akaaboune, 2010, J. Neurosci.	10.1523/JNEUROSCI.4595-09.2010	20071525		PSD (very dynamic)
Rapsyn	Burden et al., 1983, Cell	10.1016/0092-8674(83)90101-0	6652683			nAChR
Rapsyn	Gautam et al., 1995, Nature	10.1038/377232a0	7675108	Anchors nAChR to the PSD
Rapsyn	LaRochelle and Froehner, 1986, J. Biol. Chem.	n.a.	3597369			nAChR
Rapsyn	Li et al., 2016, Neuron	10.1016/j.neuron.2016.10.023	27839998	E3 ligase
Rapsyn	Walker et al., 1984, EMBO J.	10.1002/j.1460-2075.1984.tb02127.x	6389118			Actin
Ribosomal protein L7a	Ban et al., 2014, Curr. Opin. Struct. Biol.	10.1016/j.sbi.2014.01.002	24524803			In 60S subunit
Ribosomal protein L7a	de la Cruz et al., 2015, Annu. Rev. Biochem.	10.1146/annurev-biochem-060614-033917	25706898	Translation
Ribosomal protein S3	Ban et al., 2014, Curr. Opin. Struct. Biol.	10.1016/j.sbi.2014.01.002	24524803			In 60S subunit
Ribosomal protein S3	de la Cruz et al., 2015, Annu. Rev. Biochem.	10.1146/annurev-biochem-060614-033917	25706898	Translation
Ribosomal protein S6	Ban et al., 2014, Curr. Opin. Struct. Biol.	10.1016/j.sbi.2014.01.002	24524803			In 60S subunit
Ribosomal protein S6	de la Cruz et al., 2015, Annu. Rev. Biochem.	10.1146/annurev-biochem-060614-033917	25706898	Translation
Sec22b	Burri et al., 2003, Proc. Natl. Acad. Sci. U S A	10.1073/pnas.1734000100	12893879	Anterograde and retrograde transport between ER and Golgi
Sec22b	Gu et al., 2016, Proc. Natl. Acad. Sci. U S A	10.1073/pnas.1525726113	26839408	GABAA insertion into PM
Sec22b	Hay et al., 1997, Cell	10.1016/S0092-8674(00)80191-9	9094723		ER
Sec22b	Lewis et al., 1997, EMBO J.	10.1093/emboj/16.11.3017	9214619	Anterograde and retrograde transport between ER and Golgi
Sec22b	McNew et al., 2000, Nature	10.1038/35025000	11001046	Anterograde and retrograde transport between ER and Golgi
Sec22b	Washbourne, 2004, J. Neurosci.	10.1523/JNEUROSCI.2555-04.2004	15385609	Involved in delivery of NMDAR from ER to PM
Sec22b	Zhang et al., 1997, J. Cell. Biol.	10.1083/jcb.139.5.1157	9382863	Homotypic fusion of ER-derived COPII vesicles
Sec22b	Zhang et al., 1999, Mol. Biol. Cell.	10.1091/mbc.10.2.435	9950687	Homotypic fusion of ER-derived COPII vesicles
Secretogranin II	Courel et al., 2010, J. Biol. Chem.	10.1074/jbc.M109.064196	20061385	involved in DCV biogenesis
Secretogranin II	Fischer-Colbrie et al., 1995, Prog. Neurobiol.	10.1016/0301-0082(94)00060-U	7568909	Precursor to Secretoneurin
Septin7	Brand et al., 2012, Mol. Cell. Biol.	10.1128/MCB.06633-11	22508986	Regulates dendritic morphology and maturation
Septin7	Ewers et al., 2014, PLoS One	10.1371/journal.pone.0113916	25494357	Restricts diffusion at spine neck	Arc like structures, but not rings. At the base of dendrites. (At DIV14 over 80% of spines have Sept7)
Septin7	Kinoshita et al., 2002, Dev. Cell	10.1016/S1534-5807(02)00366-0	12479805		Cytoplasmic rings
Septin7	Yadav et al., 2017, Neuron	10.1016/j.neuron.2016.12.006	22222912	Regulates dendritic morphology and maturation
Shank1	Boeckers et al., 1999b, Biochem. Biophys. Res. Commun.	10.1006/bbrc.1999.1489	10527873			Shanks
Shank1	Dani et al., 2010, Neuron	10.1016/j.neuron.2010.11.021	21144999		45-80nm axially from center of synaptic cleft
Shank1	Hayashi et al., 2006, J. Neurosci.	10.1523/JNEUROSCI.2731-06.2006	16914674		Dimer of dimers (disproven by Hayashi 2009)	Multidimensional lattice with Homers
Shank1	Hayashi et al., 2009, Cell	10.1016/j.cell.2009.01.050	19345194		Tail to tail interaction 2 dimers	Mesh like structure with Homers
Shank1	MacGillavry et al., 2013, Neuron	10.1016/j.neuron.2013.03.009	23719161		80 nm clusters
Shank1	Naisbitt et al., 1999, Neuron	10.1016/S0896-6273(00)80809-0	10433268			DLGAP1
Shank1	Tao-Cheng et al., 2015, PLoS One	10.1371/journal.pone.0118750	25775468		Up to 120 nm away from postsynaptic membrane; Two pools: One closer to PSD and more stable; one more distal and dynamic
Shank1	Tu et al., 1998, Neuron	10.1016/S0896-6273(00)80589-9	9808459			mGluRs, Homers
Shank1	Uchino et al., 2006, J. Neurochem.	10.1111/j.1471-4159.2006.03831.x	16606358			GluR1
Shank1	Valtschanoff and Weinberg, 2001, J. Neurosci.	10.1523/JNEUROSCI.21-04-01211.2001	11160391		Deeper parts of PSD compared to PSD95 and GKAP
Shank2	Boeckers et al., 1999b, Biochem. Biophys. Res. Commun.	10.1006/bbrc.1999.1489	10527873			Shanks
Shank2	Dani et al., 2010, Neuron	10.1016/j.neuron.2010.11.021	21144999		45-80nm axially from center of synaptic cleft
Shank2	Du et al., 1998, Mol. Cell. Biol.	10.1128/MCB.18.10.5838	9742101			Cortactin
Shank2	Hayashi et al., 2006, J. Neurosci.	10.1523/JNEUROSCI.2731-06.2006	16914674		Dimer of dimers (disproven by Hayashi 2009)	Multidimensional lattice with Homers
Shank2	Hayashi et al., 2009, Cell	10.1016/j.cell.2009.01.050	19345194		Tail to tail interaction 2 dimers	Mesh like structure with Homers
Shank2	MacGillavry et al., 2013, Neuron	10.1016/j.neuron.2013.03.009	23719161		80 nm clusters
Shank2	Naisbitt et al., 1999, Neuron	10.1016/S0896-6273(00)80809-0	10433268			DLGAP1
Shank2	Tao-Cheng et al., 2015, PLoS One	10.1371/journal.pone.0118750	25775468		Up to 120 nm away from postsynaptic membrane; Two pools: One closer to PSD and more stable; one more distal and dynamic
Shank2	Tu et al., 1998, Neuron	10.1016/S0896-6273(00)80589-9	9808459			mGluRs, Homers
Shank2	Uchino et al., 2006, J. Neurochem.	10.1111/j.1471-4159.2006.03831.x	16606358			GluR1
Shank2	Valtschanoff and Weinberg, 2001, J. Neurosci.	10.1523/JNEUROSCI.21-04-01211.2001	11160391		Deeper parts of PSD compared to PSD95 and GKAP
Shank3	Boeckers et al., 1999b, Biochem. Biophys. Res. Commun.	10.1006/bbrc.1999.1489	10527873			Shanks
Shank3	Dani et al., 2010, Neuron	10.1016/j.neuron.2010.11.021	21144999		45-80nm axially from center of synaptic cleft
Shank3	Du et al., 1998, Mol. Cell. Biol.	10.1128/MCB.18.10.5838	9742101			Cortactin
Shank3	Hayashi et al., 2006, J. Neurosci.	10.1523/JNEUROSCI.2731-06.2006	16914674		Dimer of dimers (disproven by Hayashi 2009)	Multidimensional lattice with Homers
Shank3	Hayashi et al., 2009, Cell	10.1016/j.cell.2009.01.050	19345194		Tail to tail interaction 2 dimers	Mesh like structure with Homers
Shank3	MacGillavry et al., 2013, Neuron	10.1016/j.neuron.2013.03.009	23719161		80 nm clusters
Shank3	Naisbitt et al., 1999, Neuron	10.1016/S0896-6273(00)80809-0	10433268			DLGAP1
Shank3	Tao-Cheng et al., 2015, PLoS One	10.1371/journal.pone.0118750	25775468		Up to 120 nm away from postsynaptic membrane; Two pools: One closer to PSD and more stable; one more distal and dynamic
Shank3	Tu et al., 1998, Neuron	10.1016/S0896-6273(00)80589-9	9808459			mGluRs, Homers
Shank3	Uchino et al., 2006, J. Neurochem.	10.1111/j.1471-4159.2006.03831.x	16606358			GluR1
Shank3	Valtschanoff and Weinberg, 2001, J. Neurosci.	10.1523/JNEUROSCI.21-04-01211.2001	11160391		Deeper parts of PSD compared to PSD95 and GKAP
SNAP23	Flaumenhaft et al., 1999, J. Biol. Chem.	10.1074/jbc.274.4.2492	9891020	Release of zymogen granules from pancreatic cells		Stx4, VAMP8
SNAP23	Rao et al., 2004, J. Biol. Chem.	10.1074/jbc.M400798200	14993220	Secretory lysosomes		Stx4, VAMP7
SNAP23	Suh et al., 2010, Na. Neurosci.	10.1038/nn.2488	20118925	NMDA receptor transport to PM	Enriched in dendritic spines, perisynaptic at PSD.
SNAP23	Weber et al., 2014, PLoS One	10.1371/journal.pone.0114033	25422940	Asynchronous release		Syt7
SNAP25	Aikawa et al., 2006, Mol. Biol. Cell.	10.1091/mbc.e05-05-0382	16314394		Roughly 20% on endosomes and TGN
SNAP25	Gu and Huganir, 2016, Proc. Natl. Acad. Sci. U S A	10.1073/pnas.1614042113	27791016	Constitutive exocytosis of NMDA receptors
SNAP25	Gu et al., 2016, Proc. Natl. Acad. Sci. U S A	10.1073/pnas.1525726113	26839408	AMPA insertion into PM
SNAP25	Lau et al., 2010, J. Neurosci.	10.1523/JNEUROSCI.4933-08.2010	20053906	NMDA insertion into PM upon getting phosphorylated by PKC
SNAP25	McMahon and Südhof, 1995, J. Biol. Chem.	10.1074/jbc.270.5.2213	7836452			Alpha-SNAP
SNAP25	Söllner et al., 1993a, Nature	10.1038/362318a0	8455717			Alpha-SNAP, Stx1, VAMP2
SNAP25	Veit et al., 1996, FEBS Lett.	10.1016/0014-5793(96)00362-6	8641455		Membrane associated
SNAP29	Pan et al., 2005, J. Biol. Chem.	10.1074/jbc.M502356200	15890653	nhibits disassembly of SNARE complexes by competing with alpha-SNAP
SNAP29	Steegmaier et al., 1998, J. Biol. Chem.	10.1074/jbc.273.51.34171	9852078			Stx3
SNAP29	Su et al., 2001, Proc. Natl. Acad. Sci. U S A	10.1073/pnas.251532398	11707603	Inhibits disassembly of SNARE complexes by competing with alpha-SNAP
SNAP29	Wang et al., 2016, Mol. Cell	10.1016/j.molcel.2016.08.021	27588602	Autophagosome-late endosome/lysosome fusion		VAMP7
SNAP29	Wong et al., 1999, Mol. Biol. Cell.	10.1091/mbc.10.1.119	9880331			Stx6
SNAP47	Holt et al., 2006, J. Biol. Chem.	10.1074/jbc.M513838200	16621800		In neuronal cell bodies and processes. Also cytosolic	Stx1, VAMP2
SNAP47	Jurado et al., 2013, Neuron	10.1016/j.neuron.2012.11.029	23395379	AMPAR surface delivery during LTP, not basally	In neuronal cell bodies and processes
SNAP47	Münster-Wandowski et al., 2017	10.3389/fnana.2017.00056	28751858		Perisynaptic
SNAP47	Shimojo et al., 2015, Front. Neuroanat.	10.1016/j.celrep.2015.04.032	25792328	BDNF release from presynapse		VAMP2
Stx1	Calakos et al., 1994, Science	10.1126/science.8108733	8108733			VAMP1, VAMP2
Stx1	Hussain et al., 2016, Front. Mol. Neurosci.	10.3389/fnmol.2016.00010	26903802		More presynaptically, but also high signal in postsynapse. Colocalizes with GluN2B in postsynapse in hippocampus. Associated with PSD, postsynaptic vesicles, dendritic shaft.
Stx1	Lang et al., 2002, J. Cell. Biol.	10.1083/jcb.200203088	12177041	Most likely constitutively active
Stx1	Maidorn, 2019, Mabs	10.1080/19420862.2018.1551675	30466346			The clustering might be not as strong as thought, as nanobodies show much more smooth distribution
Stx1	Oyler et al., 1989, J. Cell. Biol.	10.1083/JCB.109.6.3039	2592413	SV fusion
Stx1	Sieber et al., 2006, Biophys. J.	10.1529/biophysj.105.079574	16443657			Forms clusters by homooligomerization
Stx1	Sieber et al., 2007, Science	10.1126/science.1141727	17717182			Forms clusters by homooligomerization
Stx1	Trimble et al., 1988, Proc. Natl. Acad. Sci. U S A	10.1073/pnas.85.12.4538	3380805	SV fusion
Stx13	Aikawa et al., 2006, Mol. Biol. Cell.	10.1091/mbc.e05-05-0382	16314394		Sorting endosome
Stx13	Antonin et al., 2002, J. Biol. Chem.	10.1074/jbc.M204369200	12114520	Involved in fusion of late endosomes		Vti1a
Stx13	Brandhorst et al., 2006, Proc. Natl. Acad. Sci. U S A	10.1073/pnas.0511138103	16469845	Homotypic fusion of early endosomes		Vti1a
Stx13	Hirling et al., 2000, Eur. J. Neurosci.	10.1046/j.1460-9568.2000.00076.x	10886332		Early endosome
Stx13	Hong, 2005, Biochim. Biophys. Acta.	10.1016/j.bbamcr.2005.03.014	15893389		Early endosome
Stx13	McBride et al., 1999, Cell	10.1016/S0092-8674(00)81966-2	10458612		Early endosome	Interact with Rab5 and EEA1
Stx13	Park et al., 2004, Science	10.1126/science.1102026	15448273	Blocking recycling endosomes with Stx13 impairs AMPAR targeting and potentiation
Stx13	Petrini et al., 2009, Neuron	10.1016/j.neuron.2009.05.025	19607795	Blocking recycling endosomes with Stx13 impairs AMPAR targeting and potentiation
Stx13	Zwilling et al., 2007, EMBO J.	10.1038/sj.emboj.7601467	17159904	Homotypic fusion of early endosomes		Vti1a
Stx16	Amessou et al., 2007, J. Cell. Sci.	10.1242/jcs.03436	17389686	Early/recycling endosome to TGN		Stx6, Vti1a
Stx16	Antonin et al., 2002, J. Biol. Chem.	10.1074/jbc.M204369200	12114520	Homotypic fusion of early endosomes
Stx16	Brandhorst et al., 2006, Proc. Natl. Acad. Sci. U S A	10.1073/pnas.0511138103	16469845	Homotypic fusion of early endosomes		Vti1a, Stx6
Stx16	Chua and Tang, 2008, Mol. Membr. Biol.	10.1080/09687680701504649	17852734	Dendritic protein traffic
Stx16	Fischer von Mollard and Stevens, 1998, J. Biol. Chem.	10.1074/jbc.273.5.2624	9446565	Early/recycling endosome to TGN		Stx6, Vti1a
Stx16	Ganley et al., 2008, J. Cell. Biol.	10.1083/jcb.200707136	18195106	Late endosome to TGN fusion
Stx16	Mallard et al., 2002, J. Cell. Biol.	10.1083/jcb.200110081	11839770	Early/recycling endosome to TGN		Stx6, Vti1a
Stx16	McBride et al., 1999, Cell	10.1016/S0092-8674(00)81966-2	10458612	Homotypic fusion of early endosomes
Stx16	Shitara et al., 2013, Mol. Cell. Biochem.	10.1007/s11010-013-1652-4	23677696	Early/recycling endosome to TGN		Stx6, Vti1a
Stx16	Simonsen et al., 1998, Eur. J. Cell Biol.	10.1016/S0171-9335(98)80116-7	9587053		TGN
Stx16	Tang et al., 1998, Biochem. Biophys. Res. Commun.	10.1006/bbrc.1997.8029	9464276		TGN
Stx16	Tang, 2008, Biochim. Biophys. Acta.	10.1016/j.bbamcr.2007.11.011	18155172		TGN
Stx16	Zwilling et al., 2007, EMBO J.	10.1038/sj.emboj.7601467	17159904	Homotypic fusion of early endosomes		Vti1a
Stx2	Calakos et al., 1994, Science	10.1126/science.8108733	8108733			VAMP1, VAMP2
Stx2	Chen et al., 2000, Blood	na	10648404	Involved in dense core release		SNAP23
Stx2	Kennedy et al., 2010, Cell	10.1016/j.cell.2010.02.042	20434989	Ratio of 1.5:1 Post/pre
Stx3	Arendt et al., 2015, Proc. Natl. Acad. Sci. U S A	10.1073/pnas.1510239112	26443861	Regulated AMPAR delivery during LTP
Stx3	Jurado et al., 2013, Neuron	10.1016/j.neuron.2012.11.029	23395379	AMPAR surface delivery during LTP, not basally	In neuronal cell bodies and processes	SNAP47, VAMP2
Stx4	Bin et al., 2018, Cell Rep.	10.1016/j.celrep.2018.05.026	29874582	mportant for basal transmission and synaptic plasticity in postsynapse of hippocampus
Stx4	Bin et al., 2018, Cell Rep.	10.1016/j.celrep.2018.05.026	29874582	Important for basal transmission and synaptic plasticity in postsynapse of hippocampus
Stx4	Gu and Huganir, 2016, Proc. Natl. Acad. Sci. U S A	10.1073/pnas.1614042113	27791016	Constitutive exocytosis of NMDA receptors		SNAP25, VAMP1
Stx4	Harris et al., 2016, Elife	10.7554/eLife.13881	27223326	Retrograde signaling in drosophila
Stx4	Kennedy et al., 2010, Cell	10.1016/j.cell.2010.02.042	20434989	Mediates AMPAR exocytosis
Stx4	Predescu et al., 2005, J. Biol. Chem.	10.1074/jbc.M505659200	16118213	Stx4 is docking site for caveolea fusion		SNAP23
Stx4	Sieber et al., 2006, Biophys. J.	10.1529/biophysj.105.079574	16443657			Forms clusters by homooligomerization
Stx5	Hay et al., 1997, Cell	10.1016/S0092-8674(00)80191-9	9094723		Cis-Golgi
Stx5	Hong, 2005, Biochim. Biophys. Acta.	10.1016/j.bbamcr.2005.03.014	15893389		Golgi
Stx5	Parlati et al., 2000, Nature	10.1038/35025076	11001058	ER to Golgi transport
Stx5	Renna et al., 2011, J. Cell. Sci.	10.1242/jcs.076489	21242315	ER to Golgi transport		Sec22b
Stx6	Antonin et al., 2000, EMBO J.	10.1093/emboj/19.23.6453	11101518			VAMP4, SNAP25, SNAP29
Stx6	Gerrard et al., 2000, Traffic	10.1034/j.1600-0854.2000.010308.x	11208109			VAMP2
Stx6	Hanson et al., 1995, J. Biol. Chem.	10.1074/jbc.270.28.16955	7622514			VAMP7 or VAMP8
Stx6	Hong, 2005, Biochim. Biophys. Acta.	10.1016/j.bbamcr.2005.03.014	15893389	TGN and late endosome
Stx6	McMahon et al., 1993, Nature	10.1038/364346a0	8332193			SNAP23
Stx6	Wade et al., 2001, J. Biol. Chem.	10.1074/jbc.M010838200	11278762			Vti1a
Stx6	Watson and Pessin, 2000, J. Biol. Chem.	10.1074/jbc.275.2.1261	10625671			VAMP4
Stx6	Wendler and Tooze, 2001, Traffic	10.1034/j.1600-0854.2001.20903.x	11555414			Stx4
Stx6	Wong et al., 1999, Mol. Biol. Cell.	10.1091/mbc.10.1.119	9880331			SNAP29
Stx8	Antonin et al., 2002, J. Biol. Chem.	10.1074/jbc.M204369200	12114520	Involved in fusion of late endosomes
Stx8	Chen et al., 2014, J. Biol. Chem.	10.1074/jbc.M114.567925	24872407	Facilitates TrkA transport from Golgi to PM, but not TrkB
Stx8	He and Linder, 2009, J. Lipid. Res.	10.1194/jlr.M800360-JLR200	18980942		Late endosomes
Synaptotagmin4	Harris et al., 2016, Elife	10.7554/eLife.13881	27223326	Retrograde signaling in drosophila
Synaptotagmin4	Korkut et al., 2013, Neuron	10.1016/j.neuron.2013.01.013	23522040	Retrograde signaling in drosophila
Synaptotagmin4	Yoshihara et al., 2005, Science	10.1126/science.1117541	16272123	Retrograde signaling in drosophila
Synaptotagmin5	Hudson and Birnbaum, 1995, Proc. Natl. Acad. Sci. U S A	10.1073/pnas.92.13.5895	7597049	Identification
Synaptotagmin5	Iezzi et al., 2004, J. Cell. Sci.	10.1242/jcs.01179	15190121	Insulin exocytosis
Synaptotagmin5	Saegusa et al., 2002, J. Biol. Chem.	10.1074/jbc.M202767200	12006594	Involved in dense-core vesicle exocytosis
Synaptotagmin7	Bacaj et al., 2013, Neuron	10.1016/j.neuron.2013.10.026	24267651	Dominant calcium sensor for slower exocytosis forms	SV
Synaptotagmin7	Bacaj et al., 2015b, PLoS Biol.	10.1371/journal.pbio.1002267	26437117	Dominant calcium sensor for slower exocytosis forms	SV
Synaptotagmin7	Flannery et al., 2010, J. Cell. Biol.	10.1083/jcb.201003021	21041449		Lysosomes
Synaptotagmin7	Fukuda and Mikoshiba, 2000, J. Biol. Chem.	10.1074/jbc.M100851200	11011146			Homo- and Heterodimers (with Syt6, Syt5, Syt10)
Synaptotagmin7	Luo et al., 2015, J. Neurosci.	10.1523/JNEUROSCI.0759-15.2015	26245964	essential for asynchronous releas	SV
Synaptotagmin7	Wen et al., 2010, Proc. Natl. Acad. Sci. U S A	10.1073/pnas.1008598107	20643933	Dominant calcium sensor for slower exocytosis forms	SV
Synaptotagmin7	Wu et al., 2017, J. Neurosci.	10.1523/JNEUROSCI.3885-16.2017	25246403	Postsynaptic AMPAR exocytosis during LTP	Endosomes
SynGAP1	Chen et al., 1998, Neuron	10.1016/s0896-6273(00)80471-7	9620694	RasGAP, activity inhibited by phosphorylation through CaMKII	in PSD	PSD95, NMDAR
SynGAP1	Clement et al., 2012, Cell	10.1016/j.cell.2012.08.045	23141534	Regulates spine morphology. Heterozygous KO mice have more mushroom shaped spines
SynGAP1	Clement et al., 2013, J. Neurosci.	10.1523/JNEUROSCI.0765-13.2013	23785156	Regulates spine morphology. Heterozygous KO mice have more mushroom shaped spines
SynGAP1	Grant & O'Dell, 2001, Curr. Opin. Neurobiol.	10.1016/s0959-4388(00)00220-8	11399436	Translation of electrical into biochemical signalling
SynGAP1	Grant, 2003, Bioessays	10.1002/bies.10381	14635258	Translation of electrical into biochemical signalling
SynGAP1	Jeyabalan & Clement, 2016, Front. Cell. Neurosci.	10.3389/fncel.2016.00032	26912996	Important for plasticity
SynGAP1	Kim et al., 1998, Neuron	10.1016/S0896-6273(00)81008-9	9581761	RasGAP	PSD	PSD95, NMDAR
SynGAP1	Komiyama et al., 2002, J. Neurosci.	10.1523/jneurosci.22-22-09721.2002	12427827	Regulates ERK/MAPK pathway		PSD95, NMDAR
SynGAP1	Krapivinsky et al., 2004, Neuron	10.1016/j.neuron.2004.08.003	15312654			CaMKII
SynGAP1	Pena et al., 2008, EMBO Rep.	10.1038/embor.2008.20	18323856	RasGap activity
SynGAP1	Rumbaugh et al., 2006, Proc. Natl. Acad. Sci. U S A	10.1073/pnas.0600084103	16537406	Regulates synaptic strength and MAPK pathway
TGN38	Gardiol et al., 1999, J. Neurosci.	10.1523/JNEUROSCI.19-01-00168.1999	9870948		n soma and in dendrites. Continous labeling with the soma, or also small uncta in dendrites
TGN38	Luzio et al., 1990, Biochem. J.	10.1042/bj2700097	2204342		Membrane protein in TGN
TGN38	Reaves et al., 1993, Mol. Biol. Cell.	10.1091/mbc.4.1.93	8443412	Cycles between TGN and PM
TOM20	Donnert et al., 2007, Biophys. J.	10.1529/biophysj.107.104497	17307826		Forms clusters
TOM20	Saitoh et al., 2007, EMBO J.	10.1038/sj.emboj.7601888	17948058	Part of the translocase in outer mitochondrial membrane. It is the initial recognition site for preproteins with presequences
TOM20	Söllner et al., 1989, Cell	10.1016/0092-8674(89)90762-9	2557158	Part of the translocase in outer mitochondrial membrane. It is the initial recognition site for preproteins with presequences
TOM20	Wurm et al., 2011, Proc. Natl. Acad. Sci. U S A	10.1073/pnas.1107553108	21799113		Median diameter of clusters is ~30-40 nm. Density of clusters is lower the further away from nucleus
Transferrin Receptor	Chi et al., 2006, J. Proteome Res.	10.1021/pr060363j	17081065		PM and secreted
Transferrin Receptor	Qian et al., 2002, Pharmacol. Rev.	10.1124/pr.54.4.561	12429868	Iron uptake	Endosomes
Transferrin Receptor	Rothenberger et al., 1987, Cell	10.1016/0092-8674(87)90295-9	3568132	Iron uptake
TrkB	Angelov and Angelova, 2017, Nanoscale	10.1039/c7nr03454g	28682396		Forms small clusters. But images are baaaad.
TrkB	Bibel et al., 1999, EMBO J.	10.1093/emboj/18.3.616	9927421			LNGFR
TrkB	Gomes et al., 2006, J. Neurosci.	10.1523/JNEUROSCI.2364-06.2006	17079678		Puncta on dendrites as well as intracellularly, as well as on axons. At DIV16 it is very localized to synapses.
TrkB	Gorski et al., 2003, J. Neurosci.	10.1523/JNEUROSCI.23-17-06856.2003	12890780	Regulates spine maturation and stabilization
TrkB	Kang and Schuman, 1995, Science	10.1126/science.7886457	7886457	Regulates LTP
TrkB	Soppet et al., 1991, Cell	10.1016/0092-8674(91)90396-G	1645620			BDNF, NTF4
TrkB	Tanaka et al., 1997, J. Neurosci.	10.1523/JNEUROSCI.17-09-02959.1997	9096132	Regulates spine maturation and stabilization
TrkB	Wirth et al., 2003, Development	10.1242/dev.00826	14573511	Regulates spine maturation and stabilization
TrkB	Xu et al., 2000, J. Neurosci.	10.1523/JNEUROSCI.20-18-06888.2000	10995833	Regulates dendritic growth
VAMP1	Calakos et al., 1994, Science	10.1126/science.8108733	8108733			Stx1, VAMP2
VAMP1	Gu and Huganir, 2016, Proc. Natl. Acad. Sci. U S A	10.1073/pnas.1614042113	27791016	Involved in GluR2 trafficking from early and recycling endosomes to PM		SNAP25, Stx4
VAMP1	Trimble et al., 1988, Proc. Natl. Acad. Sci. U S A	10.1073/pnas.85.12.4538	3380805	Identification
VAMP2	Calakos et al., 1994, Science	10.1126/science.8108733	8108733			Stx1, VAMP1
VAMP2	Gu et al., 2016, Proc. Natl. Acad. Sci. U S A	10.1073/pnas.1525726113	26839408	GABAA and AMPAR insertion into PM
VAMP2	Hu et al., 2002, Nature	10.1038/415646a	11832947			Synaptotagmin
VAMP2	Hussain and Davanger, 2015, PLoS One	10.1371/journal.pone.0140868	26488171	AMPAR insertion into PM	On postsynaptic small vesicles, often close to PSD and PM
VAMP2	Jurado et al., 2013, Neuron	10.1016/j.neuron.2012.11.029	23395379	AMPAR insertion basally and during regulated exocytosis	In neuronal cell bodies and processes	SNAP47, Stx3
VAMP2	Nevins and Thurmond, 2005, J. Biol. Chem.	10.1074/jbc.M409528200	15537656			CDC42
VAMP7	Advani et al., 1999, J. Cell. Biol.	10.1083/jcb.146.4.765	10459012		Late endosome 50%, TGN 30%, Early endosomes 5%, Lysosome 5%
VAMP7	Alberts et al., 2003, Mol. Biol. Cell.	10.1091/mbc.e03-03-0147	14517330			Stx1 and SNAP25
VAMP7	Martinez-Arca et al., 2003, Proc. Natl. Acad. Sci. U S A	10.1073/pnas.1431910100	12853575	Exocytosis of lysosomes	Late endosome 50%	Stx4 and SNAP23 and Syt7, Stx1 and SNAP25
VAMP7	Rao et al., 2004, J. Biol. Chem.	10.1074/jbc.M400798200	14993220	Secretory lysosomes		SNAP23, Stx4
VAMP7	Scheuber et al., 2006, Proc. Natl. Acad. Sci. U S A	10.1073/pnas.0603511103	17056716		At extrasynaptic sites in somatodendritic compartment of pyramidal cells
Vti1a	Amessou et al., 2007, J. Cell. Sci.	10.1242/jcs.03436	17389686	Early/recycling endosome to TGN		Stx6, Stx16
Vti1a	Antonin et al., 2002, J. Biol. Chem.	10.1074/jbc.M204369200	12114520	Involved in fusion of late endosomes		Stx13
Vti1a	Brandhorst et al., 2006, Proc. Natl. Acad. Sci. U S A	10.1073/pnas.0511138103	16469845	Homotypic fusion of early endosomes		Stx13
Vti1a	Fischer von Mollard and Stevens, 1998, J. Biol. Chem.	10.1074/jbc.273.5.2624	9446565	Early/recycling endosome to TGN		Stx6, Stx16
Vti1a	Mallard et al., 2002, J. Cell. Biol.	10.1083/jcb.200110081	11839770	Early/recycling endosome to TGN		Stx6, Stx16
Vti1a	McBride et al., 1999, Cell	10.1016/S0092-8674(00)81966-2	10458612		Early endosome	Interact with Rab5 and EEA1
Vti1a	Shitara et al., 2013, Mol. Cell. Biochem.	10.1007/s11010-013-1652-4	23677696	Early/recycling endosome to TGN		Stx6, Stx16
Vti1a	Zwilling et al., 2007, EMBO J.	10.1038/sj.emboj.7601467	17159904	Homotypic fusion of early endosomes		Stx13
