# Supplementary material for: A large-scale nanoscopy and biochemistry analysis of postsynaptic dendritic spines
Source: Springer Nature journal article supplement (doi:10.1038/s41593-021-00874-w), 2021-06-24
Supplement: MOESM7 [file 41593_2021_874_MOESM7_ESM.xlsx]

## Sheet: Sheet1
Protein	number of analyzed spines (= n)
alpha-internexin_Stubby	44
alpha-internexin_Mushroom	202
alpha-internexin_Other	209
ADAM22_Stubby	129
ADAM22_Mushroom	174
ADAM22_Other	34
Akt_Stubby	50
Akt_Mushroom	174
Akt_Other	264
alpha-beta-SNAP_Stubby	132
alpha-beta-SNAP_Mushroom	200
alpha-beta-SNAP_Other	83
AP180_Stubby	61
AP180_Mushroom	261
AP180_Other	259
APP_Stubby	184
APP_Mushroom	146
APP_Other	65
Arc_Stubby	120
Arc_Mushroom	308
Arc_Other	192
BDNF_Stubby	136
BDNF_Mushroom	72
BDNF_Other	15
beta-2-spectrin_Stubby	122
beta-2-spectrin_Mushroom	121
beta-2-spectrin_Other	48
beta-tubulin_Stubby	149
beta-tubulin_Mushroom	187
beta-tubulin_Other	73
beta-3-tubulin_Stubby	76
beta-3-tubulin_Mushroom	248
beta-3-tubulin_Other	265
Calbindin_Stubby	157
Calbindin_Mushroom	97
Calbindin_Other	63
Calcineurin_Stubby	120
Calcineurin_Mushroom	403
Calcineurin_Other	273
Calmodulin_Stubby	140
Calmodulin_Mushroom	150
Calmodulin_Other	96
Calreticulin_Stubby	187
Calreticulin_Mushroom	141
Calreticulin_Other	74
Calretinin_Stubby	141
Calretinin_Mushroom	165
Calretinin_Other	72
CamKII_Stubby	132
CamKII_Mushroom	113
CamKII_Other	59
CAPS1_Stubby	138
CAPS1_Mushroom	84
CAPS1_Other	36
Cav1.3_Stubby	159
Cav1.3_Mushroom	127
Cav1.3_Other	54
Cav2.1_Stubby	139
Cav2.1_Mushroom	106
Cav2.1_Other	50
CDC42_Stubby	84
CDC42_Mushroom	195
CDC42_Other	87
CgA_Stubby	122
CgA_Mushroom	124
CgA_Other	48
CgB_Stubby	129
CgB_Mushroom	127
CgB_Other	62
CgC_Stubby	107
CgC_Mushroom	87
CgC_Other	40
Clathrin-heavy-chain_Stubby	147
Clathrin-heavy-chain_Mushroom	272
Clathrin-heavy-chain_Other	89
Clathrin-light-chain_Stubby	119
Clathrin-light-chain_Mushroom	161
Clathrin-light-chain_Other	63
Cortactin_Stubby	93
Cortactin_Mushroom	176
Cortactin_Other	163
DLGAP1_Stubby	94
DLGAP1_Mushroom	195
DLGAP1_Other	74
DopamineD1_Stubby	134
DopamineD1_Mushroom	138
DopamineD1_Other	48
DopamineD2_Stubby	149
DopamineD2_Mushroom	190
DopamineD2_Other	52
Drebrin1_Stubby	129
Drebrin1_Mushroom	155
Drebrin1_Other	45
Dynamin_Stubby	54
Dynamin_Mushroom	276
Dynamin_Other	191
ERp72_Stubby	180
ERp72_Mushroom	165
ERp72_Other	112
GluK1_Stubby	187
GluK1_Mushroom	158
GluK1_Other	36
GluN1_Stubby	125
GluN1_Mushroom	125
GluN1_Other	75
GluN2A_Stubby	248
GluN2A_Mushroom	165
GluN2A_Other	48
GluN2B_Stubby	113
GluN2B_Mushroom	182
GluN2B_Other	78
GluR1_Stubby	113
GluR1_Mushroom	149
GluR1_Other	46
GluR2_Stubby	160
GluR2_Mushroom	198
GluR2_Other	100
GluR3_Stubby	126
GluR3_Mushroom	150
GluR3_Other	65
GRIP_Stubby	158
GRIP_Mushroom	191
GRIP_Other	72
Homer1_Stubby	127
Homer1_Mushroom	156
Homer1_Other	72
Homer2_Stubby	105
Homer2_Mushroom	242
Homer2_Other	112
Homer3_Stubby	142
Homer3_Mushroom	240
Homer3_Other	88
HSC70_Stubby	155
HSC70_Mushroom	192
HSC70_Other	67
IGF1R_Stubby	77
IGF1R_Mushroom	134
IGF1R_Other	45
Kir2.1_Stubby	151
Kir2.1_Mushroom	173
Kir2.1_Other	62
Kv1.1_Stubby	121
Kv1.1_Mushroom	194
Kv1.1_Other	58
Kv2.1_Stubby	143
Kv2.1_Mushroom	259
Kv2.1_Other	71
LNGFR_Stubby	214
LNGFR_Mushroom	140
LNGFR_Other	59
mAChR1_Stubby	131
mAChR1_Mushroom	208
mAChR1_Other	51
MAP2_Stubby	148
MAP2_Mushroom	237
MAP2_Other	82
mGluR1alpha_Stubby	102
mGluR1alpha_Mushroom	149
mGluR1alpha_Other	60
mGluR2_Stubby	130
mGluR2_Mushroom	177
mGluR2_Other	57
mGluR5_Stubby	84
mGluR5_Mushroom	194
mGluR5_Other	59
Myosin5a_Stubby	158
Myosin5a_Mushroom	170
Myosin5a_Other	55
Na_Stubby	194
Na_Mushroom	156
Na_Other	85
Na_Stubby	172
Na_Mushroom	154
Na_Other	81
Nav1.1_Stubby	159
Nav1.1_Mushroom	208
Nav1.1_Other	101
Nav1.3_Stubby	179
Nav1.3_Mushroom	128
Nav1.3_Other	58
NF_Stubby	149
NF_Mushroom	162
NF_Other	55
NF_Stubby	124
NF_Mushroom	177
NF_Other	56
nNOS_Stubby	98
nNOS_Mushroom	208
nNOS_Other	62
NSF_Stubby	88
NSF_Mushroom	199
NSF_Other	64
Actin_Stubby	154
Actin_Mushroom	160
Actin_Other	55
PSD93_Stubby	141
PSD93_Mushroom	164
PSD93_Other	60
PSD95_Stubby	123
PSD95_Mushroom	226
PSD95_Other	70
PVA_Stubby	34
PVA_Mushroom	221
PVA_Other	226
Rab11_Stubby	47
Rab11_Mushroom	127
Rab11_Other	40
Rab3_Stubby	142
Rab3_Mushroom	135
Rab3_Other	71
Rab4_Stubby	157
Rab4_Mushroom	165
Rab4_Other	100
Rab5_Stubby	169
Rab5_Mushroom	159
Rab5_Other	76
Rab7_Stubby	150
Rab7_Mushroom	167
Rab7_Other	87
Rab9_Stubby	97
Rab9_Mushroom	151
Rab9_Other	41
Rapsyn_Stubby	139
Rapsyn_Mushroom	134
Rapsyn_Other	65
RibosomeL7a_Stubby	203
RibosomeL7a_Mushroom	250
RibosomeL7a_Other	66
RibosomeS3_Stubby	201
RibosomeS3_Mushroom	213
RibosomeS3_Other	52
RibosomeS6_Stubby	162
RibosomeS6_Mushroom	200
RibosomeS6_Other	59
Sec22b_Stubby	85
Sec22b_Mushroom	127
Sec22b_Other	42
Septin7_Stubby	117
Septin7_Mushroom	204
Septin7_Other	63
Shank1_Stubby	119
Shank1_Mushroom	107
Shank1_Other	67
Shank2_Stubby	66
Shank2_Mushroom	81
Shank2_Other	46
Shank3_Stubby	81
Shank3_Mushroom	164
Shank3_Other	38
SNAP23_Stubby	94
SNAP23_Mushroom	250
SNAP23_Other	91
SNAP25_Stubby	108
SNAP25_Mushroom	76
SNAP25_Other	47
SNAP29_Stubby	108
SNAP29_Mushroom	157
SNAP29_Other	73
SNAP47_Stubby	106
SNAP47_Mushroom	219
SNAP47_Other	106
Synaptophysin_Stubby	156
Synaptophysin_Mushroom	164
Synaptophysin_Other	66
Synaptotagmin4_Stubby	94
Synaptotagmin4_Mushroom	140
Synaptotagmin4_Other	55
Synaptotagmin5_Stubby	122
Synaptotagmin5_Mushroom	205
Synaptotagmin5_Other	81
Synaptotagmin7_Stubby	194
Synaptotagmin7_Mushroom	112
Synaptotagmin7_Other	63
SynGAP1_Stubby	73
SynGAP1_Mushroom	212
SynGAP1_Other	406
Syntaxin13_Stubby	180
Syntaxin13_Mushroom	218
Syntaxin13_Other	86
Syntaxin16_Stubby	147
Syntaxin16_Mushroom	186
Syntaxin16_Other	73
Syntaxin1a_Stubby	168
Syntaxin1a_Mushroom	223
Syntaxin1a_Other	113
Syntaxin2_Stubby	122
Syntaxin2_Mushroom	242
Syntaxin2_Other	66
Syntaxin3_Stubby	110
Syntaxin3_Mushroom	198
Syntaxin3_Other	54
Syntaxin4_Stubby	115
Syntaxin4_Mushroom	212
Syntaxin4_Other	57
Syntaxin5_Stubby	162
Syntaxin5_Mushroom	260
Syntaxin5_Other	90
Syntaxin6_Stubby	158
Syntaxin6_Mushroom	135
Syntaxin6_Other	38
Syntaxin8_Stubby	109
Syntaxin8_Mushroom	181
Syntaxin8_Other	60
TfR_Stubby	89
TfR_Mushroom	256
TfR_Other	146
TGN38_Stubby	188
TGN38_Mushroom	212
TGN38_Other	63
TOM20_Stubby	183
TOM20_Mushroom	181
TOM20_Other	63
TrkB_Stubby	123
TrkB_Mushroom	133
TrkB_Other	36
vAChT_Stubby	106
vAChT_Mushroom	180
vAChT_Other	70
VAMP1_Stubby	123
VAMP1_Mushroom	216
VAMP1_Other	80
VAMP2_Stubby	149
VAMP2_Mushroom	234
VAMP2_Other	58
VAMP7_Stubby	91
VAMP7_Mushroom	271
VAMP7_Other	304
Vti1a_Stubby	243
Vti1a_Mushroom	163
Vti1a_Other	46
