# Supplementary material for: A large-scale nanoscopy and biochemistry analysis of postsynaptic dendritic spines
Source: Springer Nature journal article supplement (doi:10.1038/s41593-021-00874-w), 2021-06-24
Supplement: MOESM8 [file 41593_2021_874_MOESM8_ESM.xlsx]

## Sheet: summary of protein amounts
	neuron	mushroom	stubby	presynapse
				calculated from: Wilhelm, B. G. et al. Composition of isolated synaptic boutons reveals the amounts of vesicle trafficking proteins. Science 344, 1023–8 (2014).
number	3.60 ± 0.54 x 1010	4.27 ± 1.00 x 105	4.62 ± 1.22 x 105	2.90 ± 0.20 x 105
total molarity (mM)	11.95 ± 1.88	5.42 ± 1.26	4.37 ± 1.16	2.13 ± 0.15
soluble molarity (mM)	nd	5.21 ± 1.17	4.13 ± 1.05	1.19 ± 0.10
concentration (% wt/v)	24.34 ± 3.84	26.11 ± 6.77	22.58 ± 6.71	8.85 ± 0.57
occupied volume (%)	24.12 ± 3.80	20.54 ± 6.42	17.96 ± 6.40	13
number in PSD	nd	129398 ± 23542	119357 ± 22537	nd
% quantified proteins	nd	40.135	53.93	40.5

## Sheet: protein calculator
Select spine size	very small
Result Copy number per spine	Mushroom	Stubby	Other
Actin	120980	60871.7	135632
ADAM22	4.39144	6.56459	5.57808
Akt	16.437	15.4102	21.4928
alpha beta snap	906.322	1625.39	906.508
alpha-internexin	444.584	139.638	363.672
AP180	8.74458	8.03548	14.9792
APP	43.7182	87.4684	39.0016
Arc	1916.96	2799.21	3609.73
BDNF	21.2772	62.7572	12.7405
beta-2-spectrin	4868.06	5962.46	4926.82
beta-3-tubulin	0	0	0
beta-tubulin	29490.2	59070.8	30082.1
Calbindin	476.286	808.917	456.467
Calcineurin	3140.5	3182.86	2971.99
Calmodulin	26813.5	34375.9	24760.7
Calreticulin	507.88	1609.32	1427.47
Calretinin	47.6358	56.4699	13.3519
CamKII	13761.1	29930	15423.6
CAPS1	26.358	175.491	137.447
Cav1.3	0.21833	0.277344	0.272623
Cav2.1	18.6135	27.8411	33.8539
CDC42	440.634	780.707	638.257
ChromograninA	0.946208	3.00279	0.579147
ChromograninB	19.672	20.0637	19.5898
ChromograninC	47.5252	62.8506	37.7132
Clathrin heavy chain	7279.25	14059.6	5387.76
Clathrin light chain	3190.36	-2809.1	5903.59
Cortactin	55.1271	111.282	71.454
DLGAP1	1.83512	2.86875	3.33606
DopamineD1	0	0	0
DopamineD2	37.697	21.5167	32.6754
Drebrin1	3185.36	4067.29	2277.99
Dynamin	966.704	1146.58	1265.32
ERp72	-3.25039	18.7612	3.8042
GluK1	139.231	123.772	84.4764
GluN1	135.618	169.954	152.587
GluN2A	1.2053	1.9721	1.4713
GluN2B	145.723	170.193	123.666
GluR1	-23.9711	61.0203	108.473
GluR2	447.047	937.404	617.701
GluR3	461.409	941.908	603.625
GRIP	3.15957	4.11583	3.22216
Homer1	2.3531	1.97173	3.18129
Homer2	97.1522	147.944	92.6506
Homer3	39.4609	62.4555	65.6359
HSC70	832.991	2339.13	1040.08
IGF1R	262.787	287.106	400.89
Kir2.1	0	0	0
Kv1.1	13.6667	14.2667	8.80167
Kv2.1	0.0697505	0.339887	0.22021
LNGFR	322.495	480.185	234.371
mAChR1	13.4718	21.2612	26.7264
MAP2	1020.99	1321.49	1794.04
mGluR1alpha	0.245642	0.177912	0.305146
mGluR2	2.93955	3.41946	4.53196
mGluR5	55.9616	117.736	73.749
Myosin5a	1180.98	2622.65	770.752
Na	2468.43	5516.85	5338.77
Na	104.31	190.738	161.027
Nav1.1	8.34054	12.9937	9.44059
Nav1.3	0.0434382	0.0718551	0.0484051
NF	19.5715	57.8656	26.1325
NF	273.589	510.242	354.624
nNOS	13.4399	11.1635	11.7162
NSF	944.73	1632.76	1713.56
Parvalbumin	46.4038	70.2894	66.9178
PSD93	56.6336	109.345	127.105
PSD95	210.192	295.445	230.777
Rab11	517.485	618.056	433.224
Rab3	3573.47	3227.53	3300.72
Rab4	71.7796	125.354	115.444
Rab5	2452.05	2757.48	1309.8
Rab7	3575.88	6532.96	4739.15
Rab9	37.2931	47.0682	27.0224
Rapsyn	114.894	123.109	73.3732
RibosomeL7a	131.372	184.047	157.989
RibosomeS3	897.773	2033.44	866.591
RibosomeS6	0	0	0
Sec22b	184.693	205.666	38.9375
Septin7	289.808	670.509	442.918
Shank1	52.5081	57.5262	39.4132
Shank2	277.512	131.897	211.631
Shank3	16.5405	38.1486	32.3736
SNAP23	3.70448	4.95203	3.37566
SNAP25	1255.49	2477	1548.74
SNAP29	27.9996	42.5243	19.7988
SNAP47	4.80168	4.77864	3.73165
Synaptophysin	0	0	0
Synaptotagmin4	2.89145	4.25375	2.83694
Synaptotagmin5	53.4482	69.6277	44.2818
Synaptotagmin7	1.53102	6.40103	3.67001
SynGAP1	53.8449	62.7044	22.8327
Syntaxin13	180.357	252.611	344.409
Syntaxin16	31.6701	32.6245	33.0655
Syntaxin1a	1482.38	1947.64	1214.94
Syntaxin2	502.008	420.197	386.169
Syntaxin3	4.70076	4.60864	4.33983
Syntaxin4	4.61065	2.68614	5.25121
Syntaxin5	4.39801	4.18218	5.73558
Syntaxin6	25.2771	25.1009	13.0986
Syntaxin8	57.4739	98.4043	99.2104
TfR	227.255	301.128	377.724
TGN38	0.543312	1.06061	1.26744
TOM20	202.573	359.244	223.298
TrkB	109.427	85.2576	189.059
vAChT	0	0	0
VAMP1	171.945	216.884	150.644
VAMP2	1156.15	811.517	1529.65
VAMP7	59.9837	103.429	98.9125
Vti1a	75.644	103.438	27.3454

## Sheet: protein calculator plasticity
Select spine size	large
Result Copy number per spine	Mushroom Untreated	Mushroom Bicuculline	Mushroom TTX	Mushroom CNQXAP5	Stubby Untreated	Stubby Bicuculline	Stubby TTX	Stubby CNQXAP5
Clathrin light chain	29841.3	34582.1	46002.2	146526	30712.1	53374.9	76257	73055.9
GluN2B	839.439	1524.22	651.86	605.323	2328.84	3158.98	981.981	1342.9
GluR1	1083.56	2427.46	2676.09	1992.38	750.772	715.87	915.913	960.94
GluR2	4227.44	4007.79	5803.87	4032.22	8479.72	13013.9	4412.27	8303.77
Phalloidin	1.56099e+06	1.24017e+06	1.95834e+06	160806	956604	691011	911917	724308
SNAP47	54.7548	53.5361	37.7978	30.7224	45.9115	46.263	44.1173	38.2085
Tubulin	254343	260762	124718	159537	524380	309701	341372	150927
mGluR5	757.146	1242.1	695.933	570.647	460.102	1145.68	71.1107	1029.57

## Sheet: fits
Protein_Mush	Slope_Mush	Intercept_Mush	Rsquared_Mush	Protein_Stubby	Slope_Stubby	Intercept_Stubby	Rsquared_Stubby	Protein_Other	Slope_Other	Intercept_Other	Rsquared_Other
ADAM22-PFA_UID-Adam22_Mush	0.014341	1068.86	0.0338612	ADAM22-PFA_UID-Adam22_Flat	0.0118774	1563.7	0.0233598	ADAM22-PFA_UID-Adam22_Other	-0.000736975	1223.27	0.0295133
AP180-PFA_UID-Snap91_Mush	0.179733	4430.7	0.181912	AP180-PFA_UID-Snap91_Flat	0.338997	2037.03	0.202797	AP180-PFA_UID-Snap91_Other	0.07793	7030.44	0.0367218
APP-PFA_UID-App_Mush	0.0628333	1966.61	0.302802	APP-PFA_UID-App_Flat	0.0581203	3674.62	0.280425	APP-PFA_UID-App_Other	0.0887293	1237.52	0.551297
Akt-PFA_UID-MHakt123_Mush	0.0899146	2909.46	0.166085	Akt-PFA_UID-MHakt123_Flat	0.0863158	2165.89	0.172883	Akt-PFA_UID-MHakt123_Other	0.114129	2636.08	0.155816
Arc-PFA_UID-Arc_Mush	0.0757332	1732.78	0.0687345	Arc-PFA_UID-Arc_Flat	0.0782112	3114.98	0.0606071	Arc-PFA_UID-Arc_Other	0.01835	5439.02	0.00698198
BDNF_UID-Bdnf_Mush	0.07297	1389.82	0.251232	BDNF_UID-Bdnf_Flat	0.0681095	4278.99	0.138607	BDNF_UID-Bdnf_Other	0.162098	47.0292	0.645016
CAPS1_UID-Cadps_Mush	0.233018	-120.658	0.670323	CAPS1_UID-Cadps_Flat	0.183815	6277.32	0.109869	CAPS1_UID-Cadps_Other	0.126562	5982.41	0.0729121
CDC42-PFA_UID-Cdc42_Mush	0.0390536	1249.64	0.139204	CDC42-PFA_UID-Cdc42_Flat	0.0420212	1761.6	0.0687497	CDC42-PFA_UID-Cdc42_Other	0.0291523	1836.02	0.0894179
Calbindin_UID-Calb1_Mush	0.0393539	1681.91	0.0923511	Calbindin_UID-Calb1_Flat	0.0216744	2981.32	0.0230368	Calbindin_UID-Calb1_Other	0.0292485	1523.98	0.0959947
Calcineurin-PFA_UID-Ppp3ca_Mush	0.419589	8662.43	0.158915	Calcineurin-PFA_UID-Ppp3ca_Flat	0.402784	6607.82	0.192008	Calcineurin-PFA_UID-Ppp3ca_Other	0.370567	5699.04	0.0799716
Calmodulin-PFA_UID-Calm1_Mush	0.0634166	5050.62	0.0531497	Calmodulin-PFA_UID-Calm1_Flat	0.0413658	6444.77	0.0257419	Calmodulin-PFA_UID-Calm1_Other	0.195668	3257.38	0.142941
Calreticulin_UID-Calr_Mush	0.0465795	330.279	0.184872	Calreticulin_UID-Calr_Flat	0.0458109	959.567	0.0617192	Calreticulin_UID-Calr_Other	0.0300142	983.81	0.123148
Calretinin_UID-Calb2_Mush	0.0201971	1369.1	0.045529	Calretinin_UID-Calb2_Flat	0.0195789	1118.11	0.0260125	Calretinin_UID-Calb2_Other	0.0750421	-161.599	0.346102
CamKII_UID-MHcamk2ab_Mush	0.165261	3364.28	0.180674	CamKII_UID-MHcamk2ab_Flat	0.118367	9554.81	0.0561664	CamKII_UID-MHcamk2ab_Other	0.189893	3937.62	0.201475
Cav1.3_UID-Cacna1d_Mush	0.0978215	2177.98	0.219239	Cav1.3_UID-Cacna1d_Flat	0.115589	2101.43	0.219483	Cav1.3_UID-Cacna1d_Other	0.112767	2680.53	0.197213
Cav2.1_UID-Cacna1a_Mush	0.0388213	1299.21	0.101157	Cav2.1_UID-Cacna1a_Flat	0.0503587	1370.19	0.0846349	Cav2.1_UID-Cacna1a_Other	0.0172602	1756.3	0.0438243
CgA_UID-Chga_Mush	0.0771029	342.362	0.178812	CgA_UID-Chga_Flat	0.0302662	1919.12	0.048895	CgA_UID-Chga_Other	0.0764324	-76.3501	0.141217
CgB_UID-Chgb_Mush	0.0433628	1855.11	0.0279618	CgB_UID-Chgb_Flat	0.0409014	1286.46	0.0743222	CgB_UID-Chgb_Other	0.0157435	1927.78	0.0290123
CgC_UID-Scg2_Mush	0.295127	10676.9	0.12697	CgC_UID-Scg2_Flat	0.327845	10840.7	0.124594	CgC_UID-Scg2_Other	0.183591	6150.35	0.237244
Clathrin-HC-BDBiosciences_UID-Cltc_Mush	0.052723	719.65	0.182731	Clathrin-HC-BDBiosciences_UID-Cltc_Flat	0.0361722	1390.24	0.0826041	Clathrin-HC-BDBiosciences_UID-Cltc_Other	0.0765912	160.309	0.30604
ClathrinLC-PFA_UID-MHcltab_Mush	0.241144	1135.17	0.11963	ClathrinLC-PFA_UID-MHcltab_Flat	0.255711	-2954.84	0.458269	ClathrinLC-PFA_UID-MHcltab_Other	0.120502	2085.94	0.149181
Cortactin-PFA_UID-Cttn_Mush	0.0469734	1103.43	0.146897	Cortactin-PFA_UID-Cttn_Flat	0.0450247	1879.88	0.134794	Cortactin-PFA_UID-Cttn_Other	0.0350329	1616.03	0.095202
DLGAP1-PFA_UID-Dlgap1_Mush	0.170165	1615.24	0.143174	DLGAP1-PFA_UID-Dlgap1_Flat	0.202861	2391.23	0.124857	DLGAP1-PFA_UID-Dlgap1_Other	0.123521	4135.94	0.103813
DopamineD1-PFA_UID-Drd1_Mush	0.0259464	1087.32	0.056849	DopamineD1-PFA_UID-Drd1_Flat	0.0534791	734.044	0.225898	DopamineD1-PFA_UID-Drd1_Other	0.0436974	1024.79	0.316954
DopamineD2-PFA_UID-Drd2_Mush	0.108019	1509.86	0.335018	DopamineD2-PFA_UID-Drd2_Flat	0.177385	115.525	0.584333	DopamineD2-PFA_UID-Drd2_Other	0.104834	782.871	0.534743
Drebrin1-PFA_UID-Dbn1_Mush	0.76285	6473.34	0.37755	Drebrin1-PFA_UID-Dbn1_Flat	0.589524	8352.21	0.178097	Drebrin1-PFA_UID-Dbn1_Other	1.0358	-5.76043	0.305298
Dynamin-PFA_UID-MHdnm123_Mush	0.16332	4629.3	0.165365	Dynamin-PFA_UID-MHdnm123_Flat	0.196824	3717.67	0.185452	Dynamin-PFA_UID-MHdnm123_Other	0.132162	5822	0.164907
ERp72-PFA_UID-Pdia4_Mush	0.0641864	-494.911	0.183435	ERp72-PFA_UID-Pdia4_Flat	0.0641499	-94.3846	0.292594	ERp72-PFA_UID-Pdia4_Other	0.0653631	-324.56	0.369467
GRIP_UID-Grip1_Mush	0.0147436	810.641	0.105924	GRIP_UID-Grip1_Flat	0.0186263	860.708	0.10202	GRIP_UID-Grip1_Other	0.0247837	722.677	0.109477
GluK1-PFA_UID-Grik1_Mush	0.0266706	3352.76	0.0145945	GluK1-PFA_UID-Grik1_Flat	0.0700407	2038.98	0.0784331	GluK1-PFA_UID-Grik1_Other	0.112247	779.853	0.203882
GluN1_UID-Grin1_Mush	0.0349361	831.928	0.240752	GluN1_UID-Grin1_Flat	0.0425935	1297.59	0.150572	GluN1_UID-Grin1_Other	0.058062	883.09	0.229698
GluN2A-PFA_UID-Grin2a_Mush	0.0384106	2843.03	0.112021	GluN2A-PFA_UID-Grin2a_Flat	0.0438128	4264.44	0.193907	GluN2A-PFA_UID-Grin2a_Other	0.0278989	2200.51	0.127091
GluN2B_UID-Grin2b_Mush	0.183213	2435.24	0.479786	GluN2B_UID-Grin2b_Flat	0.26661	2877.85	0.414385	GluN2B_UID-Grin2b_Other	0.215287	1624.38	0.387334
GluR1_UID-Gria1_Mush	0.244696	-2072.61	0.431428	GluR1_UID-Gria1_Flat	0.152601	-52.3716	0.38322	GluR1_UID-Gria1_Other	0.123657	863.798	0.351897
GluR2_UID-Gria2_Mush	0.0397662	1422.98	0.233685	GluR2_UID-Gria2_Flat	0.0380687	2387.75	0.0921806	GluR2_UID-Gria2_Other	0.0355083	1841.28	0.260596
GluR3-PFA_UID-Gria3_Mush	0.0267087	543.622	0.124184	GluR3-PFA_UID-Gria3_Flat	0.019213	1434.78	0.0656904	GluR3-PFA_UID-Gria3_Other	0.0194539	1089.9	0.0570235
HSC70_UID-Hspa1a_Mush	0.032693	1248.71	0.101328	HSC70_UID-Hspa1a_Flat	0.02596	3866.5	0.0281539	HSC70_UID-Hspa1a_Other	0.0345248	2716.23	0.0366611
Homer1_UID-Homer1_Mush	0.598806	-909.717	0.724017	Homer1_UID-Homer1_Flat	0.978201	-2355.76	0.733085	Homer1_UID-Homer1_Other	1.05059	-2705.35	0.861225
Homer2_UID-Homer2_Mush	0.0953684	1627.65	0.285099	Homer2_UID-Homer2_Flat	0.0845198	2720.47	0.109681	Homer2_UID-Homer2_Other	0.122737	1152.33	0.227774
Homer3_UID-Homer3_Mush	0.160036	1877.48	0.338142	Homer3_UID-Homer3_Flat	0.31083	336.726	0.447552	Homer3_UID-Homer3_Other	0.198315	491.493	0.333849
IGF1R-PFA_UID-Igf1r_Mush	0.0330686	594.286	0.0849707	IGF1R-PFA_UID-Igf1r_Flat	0.0476191	675.706	0.154245	IGF1R-PFA_UID-Igf1r_Other	0.0565484	447.441	0.115112
Kir2.1_UID-Kcnj2_Mush	0.130825	1566.77	0.345659	Kir2.1_UID-Kcnj2_Flat	0.0571964	2269.54	0.114029	Kir2.1_UID-Kcnj2_Other	0.0757124	1487.85	0.221691
Kv1.1_UID-Kcna1_Mush	0.0480843	3131.58	0.0277421	Kv1.1_UID-Kcna1_Flat	0.0657287	2044.34	0.122502	Kv1.1_UID-Kcna1_Other	0.123064	1201.08	0.149398
Kv2.1-PFA_UID-Kcnb1_Mush	0.0410349	132.047	0.208635	Kv2.1-PFA_UID-Kcnb1_Flat	0.0188819	1505.88	0.0213751	Kv2.1-PFA_UID-Kcnb1_Other	0.0238175	1093.59	0.0693088
LNGFR_UID-Ngfr_Mush	0.0320273	1524.52	0.0431526	LNGFR_UID-Ngfr_Flat	0.0331911	1718.52	0.0752058	LNGFR_UID-Ngfr_Other	0.0772148	818.928	0.20837
MAP2-PFA_UID-Map2_Mush	0.0470249	1340.76	0.117969	MAP2-PFA_UID-Map2_Flat	0.145441	1536.04	0.182789	MAP2-PFA_UID-Map2_Other	0.0462807	2680.99	0.0327184
Myosin5a-PFA_UID-Myo5a_Mush	0.042062	625.676	0.422759	Myosin5a-PFA_UID-Myo5a_Flat	0.0382653	1305.38	0.159434	Myosin5a-PFA_UID-Myo5a_Other	0.0620206	46.5327	0.325755
NF-H-PFA_UID-Nefh_Mush	0.0675661	1664.64	0.107704	NF-H-PFA_UID-Nefh_Flat	0.0220176	4650.6	0.0114462	NF-H-PFA_UID-Nefh_Other	0.0489191	1527.3	0.104218
NF-L-PFA_UID-Nefl_Mush	0.0781576	4878.38	0.0414935	NF-L-PFA_UID-Nefl_Flat	-0.0146696	7873.22	0.00900059	NF-L-PFA_UID-Nefl_Other	0.114522	5431.89	0.0403399
NSF_UID-Nsf_Mush	0.0877799	759.449	0.240476	NSF_UID-Nsf_Flat	0.0718456	692.299	0.162471	NSF_UID-Nsf_Other	0.0518839	1329.93	0.155257
Na-K-ATPase-PFA_UID-Atp1a3_Mush	0.0664564	1440.18	0.108123	Na-K-ATPase-PFA_UID-Atp1a3_Flat	0.0597616	3051.7	0.0692717	Na-K-ATPase-PFA_UID-Atp1a3_Other	0.0291404	3870.17	0.0334816
Na-beta-1-PFA_UID-Scn1b_Mush	0.218814	2796.89	0.137075	Na-beta-1-PFA_UID-Scn1b_Flat	0.162779	3904.99	0.0836382	Na-beta-1-PFA_UID-Scn1b_Other	0.194829	4362.76	0.125002
Nav1.1-PFA_UID-Scn2a_Mush	0.0690609	1773.5	0.207	Nav1.1-PFA_UID-Scn2a_Flat	0.0932782	1985.45	0.23022	Nav1.1-PFA_UID-Scn2a_Other	0.0840633	1507.47	0.301916
Nav1.3-PFA_UID-Scn3a_Mush	0.0214781	1713.53	0.0538696	Nav1.3-PFA_UID-Scn3a_Flat	0.0367809	1698.71	0.0768058	Nav1.3-PFA_UID-Scn3a_Other	0.0589911	1232.32	0.0953743
PSD93_UID-Dlg2_Mush	0.0903252	465.29	0.348512	PSD93_UID-Dlg2_Flat	0.106803	960.331	0.152719	PSD93_UID-Dlg2_Other	0.0663319	1878.74	0.285126
PSD95-CellSignaling_UID-Dlg4_Mush	0.223764	4123.35	0.466228	PSD95-CellSignaling_UID-Dlg4_Flat	0.15877	4926.39	0.249557	PSD95-CellSignaling_UID-Dlg4_Other	0.215951	2822.16	0.200367
PVA-PFA_UID-Pvalb_Mush	0.0750381	5102.37	0.0983973	PVA-PFA_UID-Pvalb_Flat	0.0580077	8278.2	0.0566578	PVA-PFA_UID-Pvalb_Other	0.0644848	8582.18	0.0437903
Phalloidin-PFA_UID-MHphallo_Mush	0.796143	13957.4	0.197886	Phalloidin-PFA_UID-MHphallo_Flat	0.721354	4297.44	0.134977	Phalloidin-PFA_UID-MHphallo_Other	0.358554	15978.7	0.0747365
Rab11_UID-Rab11b_Mush	0.0980091	836.742	0.403896	Rab11_UID-Rab11b_Flat	0.0235277	1125.88	0.150224	Rab11_UID-Rab11b_Other	0.0575026	674.217	0.306433
Rab3_UID-MHrab3_Mush	0.162547	2183.71	0.269257	Rab3_UID-MHrab3_Flat	0.155906	1396.5	0.240583	Rab3_UID-MHrab3_Other	0.100048	1606.36	0.276063
Rab4_UID-Rab4b_Mush	0.0985293	431.968	0.445787	Rab4_UID-Rab4b_Flat	0.0493308	806.346	0.166437	Rab4_UID-Rab4b_Other	0.0616419	843.695	0.2075
Rab5_UID-MHrab5_Mush	0.00918382	613.783	0.0852891	Rab5_UID-MHrab5_Flat	0.0288725	723.573	0.110397	Rab5_UID-MHrab5_Other	0.0352891	254.277	0.12743
Rab7_UID-Rab7a_Mush	0.0363678	1171.57	0.124165	Rab7_UID-Rab7a_Flat	0.0361329	1727.39	0.0974431	Rab7_UID-Rab7a_Other	0.0375151	1415.85	0.267728
Rab9-PFA_UID-MHrab9_Mush	0.0267268	1483.38	0.0781903	Rab9-PFA_UID-MHrab9_Flat	0.00827044	1743.93	0.0200226	Rab9-PFA_UID-MHrab9_Other	0.0555789	732.235	0.234864
Rapsyn_UID-Rapsn_Mush	0.0563649	461.223	0.158509	Rapsyn_UID-Rapsn_Flat	0.0398691	531.334	0.0538735	Rapsyn_UID-Rapsn_Other	0.0698911	38.3089	0.328539
RibosomeL7a-PFA-5BSA_UID-Rpl7a_Mush	0.0143066	563.532	0.0649021	RibosomeL7a-PFA-5BSA_UID-Rpl7a_Flat	0.0187786	466.849	0.0519714	RibosomeL7a-PFA-5BSA_UID-Rpl7a_Other	0.022018	553.83	0.094483
RibosomeS3-PFA-5BSA_UID-Rps3_Mush	0.0103364	1019.73	0.0622609	RibosomeS3-PFA-5BSA_UID-Rps3_Flat	0.00476202	1889.96	0.0096033	RibosomeS3-PFA-5BSA_UID-Rps3_Other	0.0236889	586.983	0.20198
RibosomeS6-PFA-5BSA_UID-Rps6_Mush	0.0196772	132.389	0.197209	RibosomeS6-PFA-5BSA_UID-Rps6_Flat	0.00594553	658.303	0.0319901	RibosomeS6-PFA-5BSA_UID-Rps6_Other	0.00435315	731.033	0.0407041
SNAP23_UID-Snap23_Mush	0.0456494	3577.94	0.0901135	SNAP23_UID-Snap23_Flat	0.0768909	3950.46	0.175696	SNAP23_UID-Snap23_Other	0.0796209	2655.16	0.234778
SNAP25_UID-Snap25_Mush	0.0322858	1753.25	0.0380748	SNAP25_UID-Snap25_Flat	0.0278889	3657.54	0.0159638	SNAP25_UID-Snap25_Other	0.0400202	1633.83	0.0808551
SNAP29_UID-Snap29_Mush	0.0807274	728.566	0.139347	SNAP29_UID-Snap29_Flat	0.0492483	937.809	0.0953448	SNAP29_UID-Snap29_Other	0.0998751	309.6	0.319116
SNAP47_UID-Snap47_Mush	0.0890342	579.048	0.442764	SNAP47_UID-Snap47_Flat	0.0856261	464.639	0.286857	SNAP47_UID-Snap47_Other	0.13694	299.948	0.513063
Sec22b_UID-Sec22b_Mush	0.160031	1190.65	0.167648	Sec22b_UID-Sec22b_Flat	0.167771	847.775	0.266235	Sec22b_UID-Sec22b_Other	0.227435	-982.072	0.684892
Septin7_UID-Sept7_Mush	0.0814388	966.993	0.290822	Septin7_UID-Sept7_Flat	0.0402517	2311.89	0.0786967	Septin7_UID-Sept7_Other	0.105119	1763.81	0.255694
Shank1_UID-Shank1_Mush	0.0774339	324.735	0.327846	Shank1_UID-Shank1_Flat	0.0642076	345.611	0.403139	Shank1_UID-Shank1_Other	0.0748123	9.30471	0.319637
Shank2-rb_UID-Shank2_Mush	0.165527	461.561	0.212886	Shank2-rb_UID-Shank2_Flat	0.206149	15.7853	0.151533	Shank2-rb_UID-Shank2_Other	0.208203	-109.447	0.309187
Shank3-rb-PFA_UID-Shank3_Mush	0.278181	-464.15	0.282702	Shank3-rb-PFA_UID-Shank3_Flat	0.413301	488.745	0.374662	Shank3-rb-PFA_UID-Shank3_Other	0.260105	84.4767	0.492292
SynGAP1-PFA_UID-Syngap1_Mush	0.211439	2830.07	0.272595	SynGAP1-PFA_UID-Syngap1_Flat	0.153781	2061.21	0.173433	SynGAP1-PFA_UID-Syngap1_Other	0.423863	-694.157	0.431646
Synaptophysin-nanobody-PFA_UID-Syp_Mush	0.0199157	2195.08	0.0126278	Synaptophysin-nanobody-PFA_UID-Syp_Flat	0.167936	-359.474	0.101619	Synaptophysin-nanobody-PFA_UID-Syp_Other	0.25089	-1384.87	0.144128
Synaptotagmin4_UID-Syt4_Mush	0.0417999	943.572	0.104343	Synaptotagmin4_UID-Syt4_Flat	0.0222709	1284.08	0.0823101	Synaptotagmin4_UID-Syt4_Other	0.0452073	549.206	0.283009
Synaptotagmin5-PFA_UID-Syt5_Mush	0.0689818	816.1	0.273107	Synaptotagmin5-PFA_UID-Syt5_Flat	0.101376	617.663	0.177539	Synaptotagmin5-PFA_UID-Syt5_Other	0.0788168	313.988	0.237779
Synaptotagmin7_UID-Syt7_Mush	0.0658825	661.468	0.268266	Synaptotagmin7_UID-Syt7_Flat	0.0736993	2965.95	0.181209	Synaptotagmin7_UID-Syt7_Other	0.0851059	1670.92	0.202808
Syntaxin13-PFA_UID-Stx12_Mush	0.0456497	395.892	0.264904	Syntaxin13-PFA_UID-Stx12_Flat	0.0463739	705.524	0.226797	Syntaxin13-PFA_UID-Stx12_Other	0.0405603	1165.92	0.104248
Syntaxin16_UID-Stx16_Mush	0.0627755	1378.04	0.14205	Syntaxin16_UID-Stx16_Flat	0.116857	623.381	0.242994	Syntaxin16_UID-Stx16_Other	0.0961349	671.657	0.224966
Syntaxin1a-PFA_UID-Stx1a_Mush	0.00776026	3031.24	0.00671732	Syntaxin1a-PFA_UID-Stx1a_Flat	0.00948887	3350.79	0.0108464	Syntaxin1a-PFA_UID-Stx1a_Other	0.0247917	1824.72	0.0577075
Syntaxin2_UID-Stx2_Mush	0.0918179	2320.53	0.24822	Syntaxin2_UID-Stx2_Flat	0.170267	850.839	0.287485	Syntaxin2_UID-Stx2_Other	0.162168	552.622	0.255613
Syntaxin3_UID-Stx3_Mush	0.0794584	89.3289	0.286172	Syntaxin3_UID-Stx3_Flat	0.116977	-122.573	0.228516	Syntaxin3_UID-Stx3_Other	0.147929	-394.017	0.391689
Syntaxin4_UID-Stx4_Mush	0.0573963	1064.68	0.371683	Syntaxin4_UID-Stx4_Flat	0.0917998	73.4379	0.60669	Syntaxin4_UID-Stx4_Other	0.0991751	376.104	0.341613
Syntaxin5_UID-Stx5_Mush	0.0423622	663.299	0.178454	Syntaxin5_UID-Stx5_Flat	0.0673145	350.477	0.2655	Syntaxin5_UID-Stx5_Other	0.0284634	657.973	0.0896966
Syntaxin6-PFA-CellSignaling_UID-Stx6_Mush	0.0157122	776.139	0.0724979	Syntaxin6-PFA-CellSignaling_UID-Stx6_Flat	0.0359257	651.41	0.128257	Syntaxin6-PFA-CellSignaling_UID-Stx6_Other	0.0617576	95.6215	0.462385
Syntaxin8-PFA_UID-Stx8_Mush	0.0537697	718.247	0.123051	Syntaxin8-PFA_UID-Stx8_Flat	0.0747953	1229.05	0.147269	Syntaxin8-PFA_UID-Stx8_Other	0.022139	1247.27	0.0441316
TGN38-PFA_UID-Ttgn1_Mush	0.0473071	973.338	0.154251	TGN38-PFA_UID-Ttgn1_Flat	0.036718	2029.64	0.0730885	TGN38-PFA_UID-Ttgn1_Other	0.0424643	1908.07	0.0590715
TOM20-PFA_UID-Tomm20_Mush	0.0359935	961.316	0.0715055	TOM20-PFA_UID-Tomm20_Flat	0.0575188	1515.94	0.0613157	TOM20-PFA_UID-Tomm20_Other	0.128406	334.987	0.156926
TfR-PFA_UID-Tfrc_Mush	0.465853	6895.67	0.231993	TfR-PFA_UID-Tfrc_Flat	0.40112	10974.4	0.159083	TfR-PFA_UID-Tfrc_Other	0.184274	18525.9	0.0247856
TrkB_UID-Ntrk2_Mush	0.0513782	2454.01	0.107583	TrkB_UID-Ntrk2_Flat	0.0897769	1920.2	0.12884	TrkB_UID-Ntrk2_Other	-0.024449	4526.14	0.0315145
VAMP1_UID-Vamp1_Mush	0.141153	535.449	0.258045	VAMP1_UID-Vamp1_Flat	0.0903967	889.046	0.215308	VAMP1_UID-Vamp1_Other	0.142544	74.3146	0.243185
VAMP2-PFA_UID-Vamp2_Mush	0.12088	2873.8	0.0639644	VAMP2-PFA_UID-Vamp2_Flat	0.0856642	972.652	0.0647629	VAMP2-PFA_UID-Vamp2_Other	0.0451487	3253.38	0.034674
VAMP7-PFA_UID-Vamp7_Mush	0.163909	6091.56	0.0840738	VAMP7-PFA_UID-Vamp7_Flat	0.0736529	10973.3	0.0234481	VAMP7-PFA_UID-Vamp7_Other	0.158755	11045.4	0.0341441
Vti1a-PFA_UID-Vti1a_Mush	0.0328786	2805.98	0.128635	Vti1a-PFA_UID-Vti1a_Flat	0.0352693	3217.18	0.0735586	Vti1a-PFA_UID-Vti1a_Other	0.131133	81.4558	0.281722
a-Internexin-PFA_UID-Ina_Mush	0.0248075	834.91	0.0415912	a-Internexin-PFA_UID-Ina_Flat	0.0393201	-0.182565	0.298875	a-Internexin-PFA_UID-Ina_Other	0.122263	862.741	0.117477
alpha-beta-SNAP_UID-MHsnapab_Mush	0.0754835	1294	0.322063	alpha-beta-SNAP_UID-MHsnapab_Flat	0.0445568	2046.85	0.123738	alpha-beta-SNAP_UID-MHsnapab_Other	0.0727493	902.536	0.259272
beta-2-spectrin-PFA_UID-Sptbn2_Mush	0.0625331	4212.48	0.0129353	beta-2-spectrin-PFA_UID-Sptbn2_Flat	0.153337	5768.4	0.0487952	beta-2-spectrin-PFA_UID-Sptbn2_Other	0.023511	5328.19	0.0217676
beta-tubulin-nanobody-PFA_UID-MHbetatub_Mush	0.0552074	4120.24	0.0608116	beta-tubulin-nanobody-PFA_UID-MHbetatub_Flat	0.0431945	6015.69	0.0513578	beta-tubulin-nanobody-PFA_UID-MHbetatub_Other	0.0849623	3105.8	0.106225
beta3-tubulin-PFA_UID-Tubb3_Mush	0.0332571	3841.29	0.00875387	beta3-tubulin-PFA_UID-Tubb3_Flat	0.0187564	4926.95	0.0149703	beta3-tubulin-PFA_UID-Tubb3_Other	0.0863298	8069.67	0.0198302
mAChR1_UID-Chrm1_Mush	0.0609894	1801.18	0.217336	mAChR1_UID-Chrm1_Flat	0.13058	2741.38	0.187162	mAChR1_UID-Chrm1_Other	0.0589063	4992.2	0.08443
mGluR1alpha_UID-Grm1_Mush	0.0141928	644.913	0.0953118	mGluR1alpha_UID-Grm1_Flat	0.0271279	288.669	0.170412	mGluR1alpha_UID-Grm1_Other	0.0186212	717.851	0.0683486
mGluR2_UID-Grm2_Mush	0.0243611	735.815	0.106698	mGluR2_UID-Grm2_Flat	0.0337532	482.502	0.131567	mGluR2_UID-Grm2_Other	0.0162803	994.83	0.0405728
mGluR5_UID-Grm5_Mush	0.0568872	1670.29	0.132041	mGluR5_UID-Grm5_Flat	0.0418061	2199.36	0.0742038	mGluR5_UID-Grm5_Other	0.053444	2044.3	0.164601
nNOS_UID-Nos1_Mush	0.0869928	2602.36	0.113442	nNOS_UID-Nos1_Flat	0.219792	773.518	0.327879	nNOS_UID-Nos1_Other	0.191227	1316.56	0.309619
vAChT_UID-Slc18a3_Mush	0.053433	525.524	0.128856	vAChT_UID-Slc18a3_Flat	0.111427	-49.4438	0.249251	vAChT_UID-Slc18a3_Other	0.074151	945.69	0.0778891

## Sheet: fits plasticity
Row	Mush_Untreated_slope	Mush_Untreated_intercept	Mush_Untreated_R2	Mush_Bic_slope	Mush_Bic_intercept	Mush_Bic_R2	Mush_TTX_slope	Mush_TTX_intercept	Mush_TTX_R2	Mush_CNQXAP5_slope	Mush_CNQXAP5_intercept	Mush_CNQXAP5_R2	Flat_Untreated_slope	Flat_Untreated_intercept	Flat_Untreated_R2	Flat_Bic_slope	Flat_Bic_intercept	Flat_Bic_R2	Flat_TTX_slope	Flat_TTX_intercept	Flat_TTX_R2	Flat_CNQXAP5_slope	Flat_CNQXAP5_intercept	Flat_CNQXAP5_R2
ClathrinLC	0.0410176	500.234	0.288885	0.0882594	826.218	0.431099	0.0483934	902.113	0.15898	0.0307385	219.919	0.262144	0.0204779	615.667	0.199358	0.123574	47.8967	0.499235	0.108432	66.0137	0.329471	0.0876979	214.559	0.163686
GluN2B	0.0225925	994.222	0.122138	0.0444652	696.02	0.29219	0.0216128	1681.77	0.0598508	0.156096	1648.87	0.332483	0.0896599	862.725	0.592837	0.0821578	384.989	0.209821	0.0359339	1837.11	0.177877	0.0945266	2291.74	0.410736
GluR1-rabbit	0.0575214	733.076	0.298666	0.107879	365.775	0.342586	0.10124	171.034	0.369012	0.0799438	438.631	0.611842	0.0426357	1950.89	0.179124	0.0164012	1111.27	0.0625794	0.0462985	1255.83	0.254977	0.057101	1605.84	0.1539
GluR2	0.0372729	967.384	0.047142	0.0432296	968.632	0.124936	0.0502598	541.075	0.22497	0.0392619	889.861	0.243416	0.0599551	846.972	0.139813	0.121888	149.899	0.306119	0.0341164	1529.33	0.17416	0.0812995	430.582	0.34621
Phalloidin	0.290906	4527.53	0.130035	0.0412411	956.019	0.159242	0.594712	4885.76	0.276009	0.846763	3912.43	0.688195	0.312962	4104.97	0.700892	0.135141	1581.69	0.178325	0.222019	1797.69	0.696049	0.524479	6057.87	0.763365
SNAP47	0.0675912	1004	0.224958	0.0586824	766.151	0.194091	0.0495732	1331.07	0.108477	0.081136	1611.37	0.175627	0.0734153	1061.73	0.151531	0.0787453	193.12	0.639934	0.0824679	1067	0.205523	0.119811	918.892	0.519459
Tubulin	0.129915	1960.31	0.124869	0.119105	458.165	0.575409	0.0707702	2795.18	0.157394	0.0933482	2645.15	0.295978	0.36256	-3338.53	0.445263	0.130749	1077.76	0.434371	0.253017	2832.33	0.602882	0.11943	4686.74	0.358549
mGluR5	0.0643608	262.158	0.464133	0.113432	159.166	0.317973	0.130426	517.869	0.518034	0.15205	683.284	0.430717	0.0208499	940.137	0.0752467	0.120209	9.32974	0.6696	-0.0155676	3426.28	0.0538987	0.133109	737.598	0.448285

## Sheet: MeanSTEDSignal
Row	MeanSTEDIntensity_Mush	MeanSTEDIntensity_Stubby	MeanSTEDIntensity_Other
ADAM22_PFA_UID_Adam22	1371.06	1867.97	1210.53
AP180_PFA_UID_Snap91	9022.42	7643.27	8776.08
APP_PFA_UID_App	4726.24	7022.41	6613.29
Akt_PFA_UID_MHakt123	4808.59	3873.68	4847.94
Arc_PFA_UID_Arc	3316.2	4566.12	5773.05
BDNF_UID_Bdnf	4579.07	7564.15	5232.62
CAPS1_UID_Cadps	8710.6	12466.1	9787.87
CDC42_PFA_UID_Cdc42	2474.18	2928.2	2794.98
Calbindin_UID_Calb1	2777.03	3686.3	2703.92
Calcineurin_PFA_UID_Ppp3ca	18421.1	14363.3	13432.5
Calmodulin_PFA_UID_Calm1	6704.61	7894.6	7181.53
Calreticulin_UID_Calr	1746.38	2425.5	1967.79
Calretinin_UID_Calb2	1874.02	1601.75	1605.29
CamKII_UID_MHcamk2ab	7929.56	14283.7	10429.8
Cav1_3_UID_Cacna1d	5621.37	5993.86	6379.8
Cav2_1_UID_Cacna1a	2729.27	3298.71	2323.61
CgA_UID_Chga	2883.15	2903.4	2450.91
CgB_UID_Chgb	3032.11	2419.62	2339.12
CgC_UID_Scg2	17360.4	19994.9	12130.5
Clathrin_HC_BDBiosciences_UID_Cltc	2042.95	2697.86	2266.23
ClathrinLC_PFA_UID_MHcltab	8373.88	6647.56	5988.26
Cortactin_PFA_UID_Cttn	2532.92	3164.43	2486.88
DLGAP1_PFA_UID_Dlgap1	5468.35	9109.23	7809.59
DopamineD1_PFA_UID_Drd1	1704.12	2243.06	2415.02
DopamineD2_PFA_UID_Drd2	3805.37	4085.42	2663.35
Drebrin1_PFA_UID_Dbn1	19191.7	18269.2	13956.9
Dynamin_PFA_UID_MHdnm123	7778.61	6697.89	9106.67
ERp72_PFA_UID_Pdia4	2182.67	1951.54	2394.33
GRIP_UID_Grip1	1242.41	1441.94	1278.84
GluK1_PFA_UID_Grik1	4009.51	3597.31	2770.36
GluN1_UID_Grin1	1659.84	2587.83	2138.11
GluN2A_PFA_UID_Grin2a	4375.8	6709.3	3451.86
GluN2B_UID_Grin2b	7820.3	11546.7	7266.18
GluR1_UID_Gria1	5500.17	4747.82	4401.41
GluR2_UID_Gria2	3223.32	3970.99	3482.97
GluR3_PFA_UID_Gria3	1209.84	2228.52	1736.29
HSC70_UID_Hspa1a	2205.22	4645.8	3483.94
Homer1_UID_Homer1	11598	27538.8	12545.3
Homer2_UID_Homer2	3531.62	4312.12	3009.61
Homer3_UID_Homer3	9899.12	10070.8	5586.33
IGF1R_PFA_UID_Igf1r	907.943	1334.56	816.5
Kir2_1_UID_Kcnj2	5167.71	3868.3	3330.71
Kv1_1_UID_Kcna1	4543.45	3999.39	4246.81
Kv2_1_PFA_UID_Kcnb1	1636.55	2136.12	1885.69
LNGFR_UID_Ngfr	2363.66	2761.24	2759.02
MAP2_PFA_UID_Map2	2865.03	6288.85	3973.76
Myosin5a_PFA_UID_Myo5a	2234.46	2914.44	2111.53
NF_H_PFA_UID_Nefh	3950.86	5423.72	2985.84
NF_L_PFA_UID_Nefl	7270.75	7405.41	7972.08
NSF_UID_Nsf	3228.52	2655.82	2799.94
Na_K_ATPase_PFA_UID_Atp1a3	3366.35	5018.87	4940.56
Na_beta_1_PFA_UID_Scn1b	9540.67	8769.45	9868.05
Nav1_1_PFA_UID_Scn2a	3792.65	4280.92	3945.65
Nav1_3_PFA_UID_Scn3a	2531.29	2574.92	2671.1
PSD93_UID_Dlg2	3911.43	4814.29	4253.98
PSD95_CellSignaling_UID_Dlg4	14406.9	10908.4	8755.57
PVA_PFA_UID_Pvalb	7842.98	10210.6	10958.6
Phalloidin_PFA_UID_MHphallo	38027	26454.3	25955.4
Rab11_UID_Rab11b	2907.38	1572.67	1515.26
Rab3_UID_MHrab3	6268.42	5905.84	4336.38
Rab4_UID_Rab4b	2861.16	2075.83	2265.16
Rab5_UID_MHrab5	980.153	2186.41	1691.72
Rab7_UID_Rab7a	2143.27	2930	2874.41
Rab9_PFA_UID_MHrab9	2296.04	1996.16	2167.09
Rapsyn_UID_Rapsn	1292.56	1442.91	955.354
RibosomeL7a_PFA_5BSA_UID_Rpl7a	1019.8	929.646	1037.24
RibosomeS3_PFA_5BSA_UID_Rps3	1527.09	2097.06	1403.46
RibosomeS6_PFA_5BSA_UID_Rps6	896.575	859.502	867.491
SNAP23_UID_Snap23	5094.43	6885.52	5332.14
SNAP25_UID_Snap25	2210.84	4425.6	2233.16
SNAP29_UID_Snap29	2105.36	1996.87	2259.8
SNAP47_UID_Snap47	2460	2047.35	2921.49
Sec22b_UID_Sec22b	3592.67	3406.82	3075.04
Septin7_UID_Sept7	3397.33	3753.44	5276.37
Shank1_UID_Shank1	2199.81	2714.69	2305.75
Shank2_rb_UID_Shank2	1371.67	2268.17	1187.14
Shank3_rb_PFA_UID_Shank3	7370.85	13896.8	5709.64
SynGAP1_PFA_UID_Syngap1	9234.14	6362.59	13768
Synaptophysin_nanobody_PFA_UID_Syp	2767.57	4990.26	4268.35
Synaptotagmin4_UID_Syt4	1302.07	1833.75	1298.31
Synaptotagmin5_PFA_UID_Syt5	3146.88	3919.96	2566.14
Synaptotagmin7_UID_Syt7	4968.86	7890.42	6467.24
Syntaxin13_PFA_UID_Stx12	1429.67	2074.81	2088.71
Syntaxin16_UID_Stx16	2541.54	2800.48	1926.65
Syntaxin1a_PFA_UID_Stx1a	3361.06	3840.8	2819.41
Syntaxin2_UID_Stx2	4749.14	5066.33	3196.58
Syntaxin3_UID_Stx3	1610.02	2397.77	1208.3
Syntaxin4_UID_Stx4	2252.71	1813.89	1172.56
Syntaxin5_UID_Stx5	1485.03	1646.83	985.548
Syntaxin6_PFA_CellSignaling_UID_Stx6	1140.83	1629.27	1428.14
Syntaxin8_PFA_UID_Stx8	1541.23	2627.19	1641.97
TGN38_PFA_UID_Ttgn1	2800.27	3353.65	2808.87
TOM20_PFA_UID_Tomm20	1656.61	2839.68	2325.86
TfR_PFA_UID_Tfrc	15867.8	18727.4	22109.7
TrkB_UID_Ntrk2	3168.86	4006.91	4235.75
VAMP1_UID_Vamp1	2784.88	2856.39	2013.65
VAMP2_PFA_UID_Vamp2	6413.04	3993.68	4391.2
VAMP7_PFA_UID_Vamp7	11415.9	12890.6	15321
Vti1a_PFA_UID_Vti1a	4183.08	4701.32	3745.55
a_Internexin_PFA_UID_Ina	1446.68	832.267	3971.43
alpha_beta_SNAP_UID_MHsnapab	3829.57	3431.03	2830.73
beta_2_spectrin_PFA_UID_Sptbn2	4691.45	7669.85	5526.86
beta_tubulin_nanobody_PFA_UID_MHbetatub	6465.13	7882.39	6088.11
beta3_tubulin_PFA_UID_Tubb3	4708.93	5284.54	10017.8
mAChR1_UID_Chrm1	4134.01	7300.17	7385.32
mGluR1alpha_UID_Grm1	1108.57	1229.24	1166.42
mGluR2_UID_Grm2	1260.95	1323.08	1340.98
mGluR5_UID_Grm5	2891.9	3183.51	3186.18
nNOS_UID_Nos1	5279.1	6774.02	6377.27
vAChT_UID_Slc18a3	1242.47	1549.77	2125.85

## Sheet: MeanSTEDSignal plasticity
Row	MeanSTEDIntensity_Mush_Untreated	MeanSTEDIntensity_Mush_Bic	MeanSTEDIntensity_Mush_TTX	MeanSTEDIntensity_Mush_CNQXAP5	MeanSTEDIntensity_Flat_Untreated	MeanSTEDIntensity_Flat_Bic	MeanSTEDIntensity_Flat_TTX	MeanSTEDIntensity_Flat_CNQXAP5
ClathrinLC	1919.37	3490.43	1537.75	823.789	1417.87	3983.8	2451.02	2099.38
GluN2B	1454.43	1312.73	2149.17	3305.5	2253.86	1466.91	2800.41	4566.83
GluR1-rabbit	1752.43	1367.77	1148.97	1666.46	3144.22	1431.48	2494.16	2951.15
GluR2	1151.88	1376.17	1017.86	1367.83	1399.94	1683.13	1867.67	1815.92
Phalloidin	6395.69	1202.91	9879.03	9277.06	8315.17	4919.98	5963.79	18196.2
SNAP47	1806.91	1583.9	2083.9	2760.06	2196.22	2137.12	2539.4	4097.66
Tubulin	3066.73	2523	3998.49	4123.81	5955.72	4182.5	7504.89	9657.04
mGluR5	880.523	926.47	1939.77	2016.6	1178	2007.66	3157.4	2581.5

## Sheet: Copy numbers
	Mushroom	Stubby	Other		Spine classes	corresponding Homer intensity	values are based on HomerArea.*HomerMeanIntensity of both mushroom and stubby spines. The resulting lognormal distribution was log-transformed, median +- 1 or 2 SD was calculated and retransformed into linear scale. This was then normalized so that the medium value gives rise to my median copy number
ADAM22-PFA_UID-Adam22	5.1995	7.48849	5.54075		very small	6214.31			425.812	375.519		81.8949	50.1462	168.306
AP180-PFA_UID-Snap91	14.2218	14.822	17.4935		smaller	16921.4			2204.01	5101.95		154.974	344.214
APP-PFA_UID-App	87.6602	152.198	144.182		medium	46076.2			9074.1	9848.12		103.514	64.7061
Akt-PFA_UID-MHakt123	22.7895	22.0902	31.1469		large	125464			3318.42	3829.54		145.612	173.359
Arc-PFA_UID-Arc	2885.09	3549.42	3752.74		very large	341634			512461	473894		177.624	133.513
BDNF_UID-Bdnf	52.8569	100.953	63.2295						6548.04	7106.36		123.882	70.3928
CAPS1_UID-Cadps	172.967	294.852	198.75						35879.9	33864.1		207.438	114.851
CDC42-PFA_UID-Cdc42	730.541	1130.19	884.363						89792.4	126455		122.912	111.889
Calbindin_UID-Calb1	686.574	956.966	723.585						75867.9	44408.5		110.502	46.4055
Calcineurin-PFA_UID-Ppp3ca	5133.3	5017.79	4989.01						909149	1.09352e+06		177.108	217.928
Calmodulin-PFA_UID-Calm1	33018.1	40493.9	39751.1						2.44679e+06	1.67848e+06		74.1044	41.4502
Calreticulin_UID-Calr	1431.17	3137.15	2400.15						296293	460736		207.029	146.864
Calretinin_UID-Calb2	59.7284	72.9574	70.3351						5035.6	6966.68		84.3083	95.4896
CamKII_UID-MHcamk2ab	24849.1	41544.8	31433.3						4.02669e+06	2.69762e+06		162.046	64.933
Cav1.3_UID-Cacna1d	0.440548	0.589545	0.514382						59.6222	88.3733		135.336	149.901
Cav2.1_UID-Cacna1a	32.9781	54.5647	42.2112						3653.4	6482.46		110.783	118.803
CgA_UID-Chga	3.32081	4.13738	3.56085						689.086	337.201		207.505	81.5012
CgB_UID-Chgb	28.0751	31.5108	22.6217						3130.84	4147.5		111.517	131.622
CgC_UID-Scg2	65.9471	97.5846	62.744						8734.58	12461		132.448	127.695
Clathrin-HC-BDBiosciences_UID-Cltc	14199.7	23486.2	19189.8						2.84683e+06	2.45409e+06		200.485	104.491
ClathrinLC-PFA_UID-MHcltab	10143.8	13672.6	12470.9						2.26668e+06	4.07255e+06		223.455	297.863
Cortactin-PFA_UID-Cttn	100.071	163.054	96.9048						14435.3	18088.2		144.252	110.934
DLGAP1-PFA_UID-Dlgap1	3.75467	7.15581	5.31315						907.18	1237.69		241.614	172.963
DopamineD1-PFA_UID-Drd1	0	0	0						0	0		#DIV/0!	#DIV/0!
DopamineD2-PFA_UID-Drd2	65.7694	72.1802	60.6731						14503.9	24305.9		220.527	336.739
Drebrin1-PFA_UID-Dbn1	5451.49	6184.1	4943.79						1.68226e+06	1.55034e+06		308.587	250.698
Dynamin-PFA_UID-MHdnm123	1332.27	1554.34	1734.5						217716	355075		163.417	228.441
ERp72-PFA_UID-Pdia4	73.8729	120.334	111.587						16830.1	30669.2		227.825	254.867
GRIP_UID-Grip1	4.35069	6.07786	4.70022						403.222	612.473		92.68	100.771
GluK1-PFA_UID-Grik1	158.661	179.953	158.407						8317.1	27273.1		52.4206	151.557
GluN1_UID-Grin1	214.583	281.52	262.276						35132.8	36074.1		163.726	128.14
GluN2A-PFA_UID-Grin2a	1.71143	2.91652	2.13942						117.613	149.549		68.7221	51.2764
GluN2B_UID-Grin2b	318.878	433.369	303.345						58033.4	77706.4		181.993	179.308
GluR1_UID-Gria1	238.853	323.363	292.501						82315.7	80595.5		344.63	249.241
GluR2_UID-Gria2	862.809	1418.43	1043.4						82928.1	106305		96.114	74.9453
GluR3-PFA_UID-Gria3	786.688	1350.59	865.603						135033	91167.9		171.648	67.5023
HSC70_UID-Hspa1a	1265.21	2698.02	1236.39						146176	119159		115.535	44.1655
Homer1_UID-Homer1	9.70719	14.5844	10.4386						3885.86	4016.18		400.308	275.376
Homer2_UID-Homer2	154.531	196.553	145.605						32432.3	30000.2		209.876	152.631
Homer3_UID-Homer3	136.013	277.288	212.696						17077.9	66378.3		125.561	239.384
IGF1R-PFA_UID-Igf1r	298.324	394.349	409.747						84455.5	109319		283.099	277.214
Kir2.1_UID-Kcnj2	0	0	0						0	0		#DIV/0!	#DIV/0!
Kv1.1_UID-Kcna1	18.1011	23.2624	19.0143						1498.07	2976.68		82.7611	127.961
Kv2.1-PFA_UID-Kcnb1	0.294923	0.447285	0.334446						57.3706	30.9759		194.527	69.2532
LNGFR_UID-Ngfr	442.266	688.861	497.886						46757.8	64642.2		105.723	93.8393
MAP2-PFA_UID-Map2	1791.3	3406.2	2401.5						228843	611722		127.752	179.591
Myosin5a-PFA_UID-Myo5a	2974.81	4953.15	3767.74						435097	506541		146.26	102.266
NF-H-PFA_UID-Nefh	37.0946	65.5566	42.6076						4935.17	2120.01		133.043	32.3386
NF-L-PFA_UID-Nefl	370.836	485.546	460.171						31162.6	-6942.73		84.0332	-14.2988
NSF_UID-Nsf	2337.33	3807.91	2903.66						493370	799840		211.082	210.047
Na-K-ATPase-PFA_UID-Atp1a3	4484.01	8088.74	6510.69						688386	751839		153.52	92.9488
Na-beta-1-PFA_UID-Scn1b	239.419	340.211	285.104						42652.6	49124		178.151	144.393
Nav1.1-PFA_UID-Scn2a	14.3611	21.6851	18.3506						2034.66	3674.28		141.678	169.438
Nav1.3-PFA_UID-Scn3a	0.0595314	0.096001	0.0808642						3.95751	10.6977		66.4777	111.433
PSD93_UID-Dlg2	215.779	324.142	236.017						38667.6	55829.8		179.2	172.239
PSD95-CellSignaling_UID-Dlg4	549.197	545.038	485.232						66306.7	61765.6		120.734	113.324
PVA-PFA_UID-Pvalb	65.3556	83.0791	81.6354						4891.61	3727.56		74.8461	44.8676
Phalloidin-PFA_UID-MHphallo	243350	183404	193353						3.95994e+07	3.88125e+07		162.726	211.623
Rab11_UID-Rab11b	1040.62	764.1	636.366						272340	89195.1		261.709	116.732
Rab3_UID-MHrab3	7013.52	8058.54	6423.99						1.41282e+06	1.65164e+06		201.442	204.955
Rab4_UID-Rab4b	196.669	233.814	213.163						52550.9	43180.6		267.205	184.679
Rab5_UID-MHrab5	3582.56	6676.65	4678.93						262559	685945		73.2881	102.738
Rab7_UID-Rab7a	5483.87	9806.47	8261.01						724609	943614		132.135	96.2236
Rab9-PFA_UID-MHrab9	51.9117	52.3336	54.3419						4719.61	1727.2		90.9162	33.0036
Rapsyn_UID-Rapsn	183.005	228.002	148.312						61952	48939.3		338.527	214.644
RibosomeL7a-PFA-5BSA_UID-Rpl7a	205.342	293.206	237.271						22453.1	46077.1		109.345	157.149
RibosomeS3-PFA-5BSA_UID-Rps3	1264.78	2221.48	1656.55						67233.9	41122.1		53.1584	18.5112
RibosomeS6-PFA-5BSA_UID-Rps6	0	0	0						0	0		#DIV/0!	#DIV/0!
SNAP23_UID-Snap23	4.88712	7.6999	5.71422						343.034	671.225		70.1915	87.1732
SNAP25_UID-Snap25	1420.6	2861.57	1837.2						162007	142208		114.041	49.6958
SNAP29_UID-Snap29	47.9172	68.2678	48.0959						14264.9	13088.8		297.699	191.728
SNAP47_UID-Snap47	10.4317	9.81548	9.47231						2930.33	3185.71		280.907	324.559
Sec22b_UID-Sec22b	303.661	370.654	277.626						104995	141643		345.765	382.144
Septin7_UID-Sept7	668.379	982.315	966.881						124439	82297.6		186.181	83.7793
Shank1_UID-Shank1	143.322	209.726	191.638						39144.4	38494.4		273.123	183.546
Shank2-rb_UID-Shank2	255.439	230.685	212.122						239133	162594		936.165	704.831
Shank3-rb-PFA_UID-Shank3	96.4119	173.412	108.676						28211.3	40001.3		292.613	230.672
SynGAP1-PFA_UID-Syngap1	119.983	132.244	162.054						21342	24829.8		177.875	187.757
Synaptophysin-nanobody-PFA_UID-Syp	0	0	0						0	0		#DIV/0!	#DIV/0!
Synaptotagmin4_UID-Syt4	3.1287	5.48359	4.43687						781.172	520.305		249.679	94.884
Synaptotagmin5-PFA_UID-Syt5	135.121	218.762	141.374						23004.7	43908.1		170.252	200.712
Synaptotagmin7_UID-Syt7	7.1039	14.7511	10.7896						731.389	1074.02		102.956	72.8094
Syntaxin13-PFA_UID-Stx12	379.43	527.44	507.322						94058.3	91600		247.894	173.669
Syntaxin16_UID-Stx16	45.5226	67.6989	50.1986						8744.29	21922		192.087	323.815
Syntaxin1a-PFA_UID-Stx1a	1617.93	2193.85	1731.06						30428.4	43945.6		18.807	20.0313
Syntaxin2_UID-Stx2	824.633	1115.21	791.1						124040	290837		150.419	260.791
Syntaxin3_UID-Stx3	12.9792	18.2846	9.98318						4968.19	6916.67		382.78	378.277
Syntaxin4_UID-Stx4	7.30745	7.56686	6.20444						1447.3	2970.07		198.058	392.51
Syntaxin5_UID-Stx5	7.04889	8.95866	6.77087						1562.49	2841.66		221.665	317.197
Syntaxin6-PFA-CellSignaling_UID-Stx6	33.0025	46.7564	39.0207						3547.28	8013.92		107.485	171.397
Syntaxin8-PFA_UID-Stx8	84.1712	152.626	117.631						22811.7	33768.3		271.015	221.248
TGN38-PFA_UID-Ttgn1	1.2005	1.57539	1.63911						157.695	134.713		131.357	85.5112
TOM20-PFA_UID-Tomm20	283.196	544.543	458.417						47880.8	85827		169.073	157.613
TfR-PFA_UID-Tfrc	368.315	418.75	424.55						84015.2	69800.4		228.107	166.687
TrkB_UID-Ntrk2	125.035	137.856	183.075						15818	24018.8		126.509	174.232
VAMP1_UID-Vamp1	338.978	427.01	315.944						133305	104930		393.255	245.732
VAMP2-PFA_UID-Vamp2	2045.37	2153.45	1900.71						299896	358735		146.621	166.586
VAMP7-PFA_UID-Vamp7	96.3087	116.636	125.952						10774.8	5267.32		111.878	45.1605
Vti1a-PFA_UID-Vti1a	105.114	141.515	114.266						6477.51	8329.83		61.6237	58.8617
a-Internexin-PFA_UID-Ina	650.279	475.975	890.158						86849.5	174386		133.557	366.377
alpha-beta-SNAP_UID-MHsnapab	1968.61	2399.9	1894.31						301577	243122		153.193	101.305
beta-2-spectrin-PFA_UID-Sptbn2	4963.67	6803.93	4974.12						517534	1.05998e+06		104.264	155.79
beta-tubulin-nanobody-PFA_UID-MHbetatub	42716.6	74094.7	50400.1						2.85597e+06	3.20527e+06		66.8585	43.2591
beta3-tubulin-PFA_UID-Tubb3	0	0	0						0	0		#DIV/0!	#DIV/0!
mAChR1_UID-Chrm1	25.5449	43.6862	36.8371						2933.69	6076.33		114.845	139.09
mGluR1alpha_UID-Grm1	0.371447	0.478286	0.426992						37.0949	81.9669		99.866	171.376
mGluR2_UID-Grm2	4.17787	6.53548	5.54494						628.377	1295.34		150.406	198.201
mGluR5_UID-Grm5	79.9658	152.416	98.879						12244.9	15627		153.126	102.529
nNOS_UID-Nos1	22.5744	35.3477	29.8284						2895.94	8898.18		128.284	251.733
vAChT_UID-Slc18a3	0	0	0						0	0		#DIV/0!	#DIV/0!
